# Supplementary material
Source: Research Square preprint supplement (doi:10.21203/rs.3.rs-9011993/v1)
Supplement: Supplementary file 1 [file 0b5951e7080f39e64d36d44c.xlsx]

## Sheet: GWAS
First Author	Paper	File Link	Filename	Info
Trubetskoy	PMID:35396580	https://figshare.com/ndownloader/files/34517828	PGC3_SCZ_wave3.european.autosome.public.v3.vcf.tsv.gz	Schizophrenia GWAS sumstats
O'Connell	PMID:39843750	https://figshare.com/ndownloader/files/49760772	bip2024_eur_no23andMe.gz	Bipolar Disorder GWAS sumstats
Adams	PMID:39814019	https://figshare.com/ndownloader/files/51487022	pgc-mdd2025_no23andMe-noUKBB_eur_v3-49-24-11.tsv.gz	Major depressive disorder GWAS sumstats
Demontis	PMID:36702997	https://figshare.com/ndownloader/files/40036684	ADHD2022_iPSYCH_deCODE_PGC.meta.gz	ADHD GWAS sumstats
Strom	PMID:40360802	https://figshare.com/ndownloader/files/53357735	daner_OCD_full_wo23andMe_190522.gz	Obsessive-compulsive disorder GWAS sumstats

## Sheet: Functional genomic data
First Author	Paper	File Link	Info
Ziffra	PMID:38781368	https://static-content.springer.com/esm/art%3A10.1038%2Fs41586-021-03209-8/MediaObjects/41586_2021_3209_MOESM4_ESM.xlsx	Human fetal brain snATAC-seq data.
Fujita	PMID: 38514782	https://www.synapse.org/Synapse:syn52363777	Human adult cortex eQTL data from Synapse repository. Personal access token required.

## Sheet: Software
Name	Version	Link / PMID	Description
split-pipe	1.3.1	https://www.parsebiosciences.com/	Proprietary Parse scRNAseq software suite
Scanpy	1.10.4	PMID:29409532	scRNAseq software suite
Scrublet	0.2.3	PMID:30954476	scRNAseq doublet removal tool
GenotypeQCtoHRC	2	PMID:36752340	Software suite for pre-imputation genotype QC
Minimac	4.1.6	PMID:25338720	Genotype imputation tool
Eagle	2.4	PMID:27694958	Reference-based halotype phasing tool
Plink	1.9	PMID:17701901	Command-line toolkit for population genetics
Plink	2	PMID:25722852	Command-line toolkit for population genetics
TensorQTL	1.0.8	PMID:33658504	GPU-enabled QTL mapper
EdgeR	4.2.2	PMID:19910308	Package for differential expression analysis of gene expression data (used for TMM nromalisation)
cellSNP-lite	1.2.2	PMID:33963851	cellSNP-lite piles up reads at known SNPs in the single-cell BAM (using a whitelist + variant VCF) to generate per-cell allelic counts/genotypes
Vireo	0.5.9	PMID:31836005	Vireo uses cell-specific cellSNP-lite derived pile ups together with a donor/reference genotype VCF to deconvolute and assign cells to original samples
susieR	0.11.92	PMID:37220626	R package to run to define the 95% credible set of SNPs containing the causal eQTL for identified eGenes
LDSC	1.0.1	PMID:26414678	Python package that estimates SNP heritability, genetic correlations between traits, and functional enrichments directly from GWAS summary statistics
Genotype Harmonizer	1.4.28	PMID:25495213	Java tool that aligns and harmonizes genotype datasets (used to prepare genotype data for imputation on TopMed site)
biomaRt	2.60.1	PMID:19617889	R/Bioconductor package used to query Ensembl databases to fetch gene annotations
q-value	2.36.0	http://github/jdstorey/qvalue	q-value R package used for π1 calulations
GenomicRanges	1.56.2	PMID:23950696	Bioconductor package (R) that provides efficient, memory-optimized interval-based data structures for representing and manipulating genomic coordinates
nullranges	1.10.0	PMID:37042725	R package used to create bootstrapped null OCR sets
SMR	1.4.0	PMID:27019110	Tool for running summary-data-based Mendelian randomization
FUSION	N/A	PMID:26854917	Suite of tools for performing transcriptome-wide and regulome-wide association studies (used to generate TWAS weights)
cTWAS	0.5.36	PMID:38279041	Package to run Causal transcriptome-wide association studies (cTWAS) a Bayesian fine-mapping framework that jointly models imputed gene expression and direct SNP effects within LD blocks
Harmony	0.1	PMID:30547121	Python algorithm for batch-effect correction in single-cell RNA-seq data
bcftools	1.9	PMID:21903627	Utilities for variant calling and manipulating VCFs and BCFs
