# Supplementary material
Source: Research Square preprint supplement (doi:10.21203/rs.3.rs-9011993/v1)
Supplement: Supplementary file 2 [file 30920761423180a2edf40e51.xlsx]

## Sheet: Schizophrenia
Cell type	Gene symbol	Ensembl ID	Z-score	P (uncorrected)	Bonferroni P	PIP	CS	Type	Chr
Glu-UL-1	ANKRD45	ENSG00000183831	-5.04	4.7e-07	0.0004	0.95	L1	protein_coding	1
GABA-1	ANKRD45	ENSG00000183831	-5.21	1.9e-07	0.00016	0.89	L1	protein_coding	1
Glu-UL-0	NA	ENSG00000296616	-4.83	1.4e-06	0.0017	0.88	L1	lncRNA	1
GABA	SLC9C2	ENSG00000162753	-5.28	1.3e-07	0.00016	0.88	L1	protein_coding	1
GABA-0	ST3GAL3	ENSG00000126091	7.06	1.7e-12	1.2e-09	0.98	L1	protein_coding	1
GABA	ACYP2	ENSG00000170634	-5.01	5.5e-07	0.00071	0.86	L1	protein_coding	2
Glu-UL-2	ACYP2	ENSG00000170634	-5.28	1.3e-07	0.00014	0.91	L1	protein_coding	2
Glu-UL-1	FOXN2	ENSG00000170802	-4.15	3.3e-05	0.028	0.99	L1	protein_coding	2
Glu-DL-1	FOXN2	ENSG00000170802	-5.39	7.2e-08	5e-05	0.98	L1	protein_coding	2
GABA-1	FOXN2	ENSG00000170802	-4.89	1e-06	0.00087	0.9	L1	protein_coding	2
GABA-1	PRKD3	ENSG00000115825	-5.5	3.7e-08	3.1e-05	0.82	L1	protein_coding	2
Glu-DL-1	BBS12	ENSG00000181004	4.81	1.5e-06	0.0011	0.98	L1	protein_coding	4
Glu-UL	CXXC5	ENSG00000171604	-5.72	1e-08	1.7e-05	0.92	L2	protein_coding	5
Glu-UL	NA	ENSG00000287862	4.55	5.3e-06	0.0089	1	L1	lncRNA	5
MG	NA	ENSG00000287862	4.31	1.6e-05	0.0061	0.96	L3	lncRNA	5
Glu-UL-1	NA	ENSG00000287862	4.23	2.3e-05	0.02	1	L2	lncRNA	5
Glu-UL-2	NA	ENSG00000287862	5.26	1.4e-07	0.00015	1	L2	lncRNA	5
GABA-1	NA	ENSG00000287862	4.74	2.2e-06	0.0018	1	L1	lncRNA	5
NPC-0	NA	ENSG00000287862	3.98	7e-05	0.043	0.98	L3	lncRNA	5
NPC-1	NA	ENSG00000287862	4.11	4e-05	0.03	0.98	L2	lncRNA	5
NPC	PCDHB15	ENSG00000113248	6.19	6.1e-10	7.6e-07	0.99	L1	protein_coding	5
GABA	SLCO4C1	ENSG00000173930	-6.38	1.8e-10	2.2e-07	0.95	L1	protein_coding	5
Glu-UL	C6orf47	ENSG00000204439	-4.91	9.1e-07	0.0015	1	L4	protein_coding	6
Glu-UL-1	HMGN4	ENSG00000182952	12.99	1.3e-38	1.1e-35	1	L1	protein_coding	6
Glu-UL-0	LINC03003	ENSG00000290496	9.43	4.2e-21	5.1e-18	0.99	L2	lncRNA	6
Glu-UL	MSH5	ENSG00000204410	9.03	1.8e-19	3e-16	1	L1	protein_coding	6
Glu-UL-2	MSH5	ENSG00000204410	8.04	9.3e-16	1e-12	1	L2	protein_coding	6
GABA	NA	ENSG00000290870	5.66	1.5e-08	2e-05	1	L2	lncRNA	6
NPC	NA	ENSG00000290870	5.92	3.2e-09	4e-06	1	L4	lncRNA	6
Glu-DL-1	NA	ENSG00000290870	6.62	3.7e-11	2.6e-08	0.96	L3	lncRNA	6
Glu-DL	POU5F1	ENSG00000204531	-5.73	1e-08	1.4e-05	0.99	L2	protein_coding	6
NPC-1	TAP2	ENSG00000204267	-4.96	7.2e-07	0.00054	0.98	L3	protein_coding	6
GABA-0	VWA7	ENSG00000204396	-9	2.3e-19	1.6e-16	1	L2	protein_coding	6
Glu-DL	ZKSCAN8	ENSG00000198315	-13.16	1.5e-39	2e-36	1	L1	protein_coding	6
Glu-UL-1	ZSCAN26	ENSG00000197062	13.54	9e-42	7.7e-39	1	L1	protein_coding	6
GABA-1	ZSCAN26	ENSG00000197062	13.82	2e-43	1.6e-40	1	L1	protein_coding	6
Glu-DL-1	NA	ENSG00000228944	-6.7	2.1e-11	1.5e-08	1	L1	lncRNA	7
Glu-UL-0	IQANK1	ENSG00000203499	6.13	8.8e-10	1.1e-06	0.99	L1	protein_coding	8
Glu-DL	NA	ENSG00000235007	4.66	3.2e-06	0.0043	0.92	L1	protein_coding	9
GABA	NA	ENSG00000235007	4.95	7.4e-07	0.00095	0.98	L1	protein_coding	9
NPC	NA	ENSG00000235007	5.15	2.6e-07	0.00032	0.99	L1	protein_coding	9
OPC	NA	ENSG00000235007	5.25	1.5e-07	6.5e-05	0.99	L1	protein_coding	9
Glu-UL-0	NA	ENSG00000235007	5.26	1.5e-07	0.00018	0.99	L1	protein_coding	9
Glu-UL-1	NA	ENSG00000235007	5.14	2.8e-07	0.00023	0.99	L1	protein_coding	9
Glu-DL-0	NA	ENSG00000235007	4.85	1.2e-06	0.00095	0.97	L1	protein_coding	9
GABA-0	NA	ENSG00000235007	4.93	8.4e-07	0.00059	0.98	L1	protein_coding	9
NPC-1	NA	ENSG00000235007	4.85	1.2e-06	0.00092	0.97	L1	protein_coding	9
GABA-1	ARL3	ENSG00000138175	-8.16	3.5e-16	2.9e-13	1	L1	protein_coding	10
NPC-1	AS3MT	ENSG00000214435	7.51	5.9e-14	4.4e-11	0.96	L4	protein_coding	10
GABA-1	LINC02755	ENSG00000254530	4.03	5.5e-05	0.046	0.96	L1	lncRNA	11
Glu-DL	SNX19	ENSG00000120451	5.8	6.7e-09	9e-06	0.91	L1	protein_coding	11
NPC-1	SNX19	ENSG00000120451	5.82	5.9e-09	4.4e-06	0.86	L1	protein_coding	11
Glu-UL-1	NA	ENSG00000257681	-5.03	4.9e-07	0.00042	0.96	L2	lncRNA	12
GABA	LINC00382	ENSG00000229175	-6.84	7.9e-12	1e-08	0.92	L1	lncRNA	13
Glu-DL-1	NA	ENSG00000285902	-6.85	7.5e-12	5.2e-09	0.91	L1	lncRNA	13
NPC-1	NA	ENSG00000285902	-7	2.5e-12	1.9e-09	0.98	L1	lncRNA	13
GABA-0	CCDC175	ENSG00000151838	5.08	3.8e-07	0.00026	0.98	L1	protein_coding	14
NPC-0	PYGL	ENSG00000100504	-4.42	9.7e-06	0.006	0.97	L1	protein_coding	14
Glu-UL-1	NA	ENSG00000259713	-5.49	4.1e-08	3.5e-05	0.99	L1	lncRNA	15
Glu-DL	INO80E	ENSG00000169592	7.52	5.3e-14	7.1e-11	0.81	L1	protein_coding	16
NPC-0	NA	ENSG00000275734	5.89	4e-09	2.4e-06	0.9	L1	lncRNA	16
NPC-1	BAIAP2	ENSG00000175866	4.99	6.2e-07	0.00046	1	L1	protein_coding	17
NPC-0	APC2	ENSG00000115266	4.58	4.5e-06	0.0028	0.97	L1	protein_coding	19
Glu-DL-1	NA	ENSG00000286100	4.82	1.5e-06	0.001	0.98	L1	lncRNA	20
GABA-0	NA	ENSG00000286100	4.95	7.3e-07	0.00052	0.98	L1	lncRNA	20

## Sheet: Bipolar disorder
Cell type	Gene symbol	Ensembl ID	Z-score	P (uncorrected)	Bonferroni P	PIP	CS	Type	Chr
GABA-0	ST3GAL3	ENSG00000126091	5.25	1.5e-07	0.0001	0.92	L1	protein_coding	1
Glu-DL-2	NA	ENSG00000279983	4.33	1.5e-05	0.0099	0.97	L1	protein_coding	5
Glu-UL-1	HMGN4	ENSG00000182952	8.34	7.5e-17	6.4e-14	1	L1	protein_coding	6
Glu-UL	MSH5	ENSG00000204410	5.5	3.8e-08	6.5e-05	0.97	L1	protein_coding	6
Glu-UL	NA	ENSG00000299747	5.08	3.7e-07	0.00063	0.96	L1	lncRNA	6
Glu-UL-0	POLR1HASP	ENSG00000293508	4.83	1.4e-06	0.0017	1	L2	lncRNA	6
GABA-1	ZSCAN26	ENSG00000197062	6.33	2.5e-10	2.1e-07	1	L1	protein_coding	6
Glu-UL-2	GIGYF1	ENSG00000146830	4.68	2.8e-06	0.0031	1	L1	protein_coding	7
GABA-1	NA	ENSG00000292277	4.42	9.8e-06	0.0083	0.97	L1	protein_coding	7
Glu-UL	ERI1	ENSG00000104626	4.62	3.7e-06	0.0063	0.95	L1	protein_coding	8
Glu-DL	PLEC	ENSG00000178209	-5.3	1.1e-07	0.00015	0.9	L1	protein_coding	8
GABA-1	PLEC	ENSG00000178209	-5.29	1.2e-07	0.0001	0.94	L1	protein_coding	8
GABA-0	SNX16	ENSG00000104497	5.44	5.3e-08	3.7e-05	0.95	L1	protein_coding	8
Glu-UL-2	ARL3	ENSG00000138175	-5.07	4e-07	0.00044	0.95	L1	protein_coding	10
GABA-1	ARL3	ENSG00000138175	-4.66	3.1e-06	0.0026	0.98	L1	protein_coding	10
GABA	NA	ENSG00000285902	-6.49	8.4e-11	1.1e-07	0.94	L1	lncRNA	13
GABA-0	NA	ENSG00000285902	-6.6	4.1e-11	2.9e-08	0.98	L1	lncRNA	13
GABA	NA	ENSG00000259683	-7.26	4e-13	5.1e-10	0.93	L1	pseudogene	15
GABA-1	NA	ENSG00000259683	-7.05	1.8e-12	1.5e-09	0.83	L1	pseudogene	15
NPC-2	NA	ENSG00000285942	-4.89	1e-06	0.00046	0.95	L1	protein_coding	15
Glu-DL	INO80E	ENSG00000169592	5.7	1.2e-08	1.6e-05	0.91	L1	protein_coding	16
Glu-UL-2	NA	ENSG00000250917	-4.84	1.3e-06	0.0014	1	L1	lncRNA	20

## Sheet: Major depressive disorder
Cell type	Gene symbol	Ensembl ID	Z-score	P (uncorrected)	Bonferroni P	PIP	CS	Type	Chr
NPC	NEGR1	ENSG00000172260	8.51	1.8e-17	2.3e-14	1	L2	protein_coding	1
OPC	PTGER3	ENSG00000050628	-4.41	1.1e-05	0.0047	0.97	L1	protein_coding	1
NPC-0	NA	ENSG00000294474	-4.98	6.4e-07	0.00039	0.82	L1	lncRNA	2
Glu-DL	GRAMD1C	ENSG00000178075	4.89	1e-06	0.0014	0.85	L1	protein_coding	3
NPC	IHO1	ENSG00000173421	-4.11	4e-05	0.05	1	L3	protein_coding	3
NPC-1	UBA7	ENSG00000182179	-8.49	2e-17	1.5e-14	0.94	L1	protein_coding	3
Glu-UL-0	WDR6	ENSG00000178252	8.54	1.3e-17	1.6e-14	1	L1	protein_coding	3
Glu-DL-1	CLOCK	ENSG00000134852	5.61	2.1e-08	1.4e-05	0.95	L1	protein_coding	4
Glu-DL	LINC00504	ENSG00000248360	4.51	6.4e-06	0.0086	0.97	L1	lncRNA	4
Glu-UL-1	HMGN4	ENSG00000182952	7.48	7.7e-14	6.5e-11	1	L1	protein_coding	6
Glu-DL	NA	ENSG00000290474	4.78	1.7e-06	0.0023	1	L2	lncRNA	6
NPC	NA	ENSG00000291112	-7.51	6e-14	7.4e-11	1	L1	lncRNA	6
Glu-UL-0	POLR1HASP	ENSG00000293508	5.31	1.1e-07	0.00013	1	L2	lncRNA	6
Glu-UL-2	LINC00174	ENSG00000179406	-4.84	1.3e-06	0.0014	0.96	L1	lncRNA	7
Glu-UL	NA	ENSG00000286474	-7.48	7.4e-14	1.2e-10	1	L1	lncRNA	9
Glu-DL	NA	ENSG00000286474	-6.53	6.4e-11	8.6e-08	0.97	L1	lncRNA	9
Glu-DL-2	NA	ENSG00000286474	-6.71	2e-11	1.3e-08	0.95	L1	lncRNA	9
MG	BLNK	ENSG00000095585	-5.06	4.3e-07	0.00016	0.97	L1	protein_coding	10
Glu-DL	INA	ENSG00000148798	-5.4	6.7e-08	9e-05	0.99	L2	protein_coding	10
Glu-UL-0	SPPL3	ENSG00000157837	-4.01	6.1e-05	0.075	0.86	L1	protein_coding	12
Glu-UL-1	CCDC32	ENSG00000128891	-5.59	2.3e-08	2e-05	0.88	L1	protein_coding	15
NPC-2	DISP2	ENSG00000140323	-5.86	4.5e-09	2e-06	0.99	L1	protein_coding	15

## Sheet: ADHD
Cell type	Gene symbol	Ensembl ID	Z-score	P (uncorrected)	Bonferroni P	PIP	CS	Type	Chr
GABA	ST3GAL3	ENSG00000126091	7.46	9e-14	1.1e-10	0.98	L1	protein_coding	1

## Sheet: Obsessive-compulsive disorder
Cell type	Gene symbol	Ensembl ID	Z-score	P (uncorrected)	Bonferroni P	PIP	CS	Type	Chr
Glu-DL	ZKSCAN8	ENSG00000198315	-5.38	7.4e-08	0.0001	0.98	L1	protein_coding	6
