# Supplementary material
Source: Research Square preprint supplement (doi:10.21203/rs.3.rs-9011993/v1)
Supplement: Supplementary file 3 [file 41364ad034e0bd41ca4c6464.xlsx]

## Sheet: Glu-UL
gene	logfoldchange	pval	pval_adj	score
PLXNA4	2.46604	0	0	475.152
SATB2	2.40872	0	0	443.834
CUX2	2.548	0	0	437.705
EPHA3	2.25443	0	0	384
TENM4	1.56802	0	0	366.647
SLC44A5	1.7453	0	0	357.763
NKAIN2	1.79698	0	0	351.74
LRRC7	1.32605	0	0	346.369
LDLRAD4	1.57992	0	0	336.943
FRMD4B	1.63451	0	0	318.7
MLLT3	1.36659	0	0	303.481
CACNA2D1	1.52282	0	0	301.417
MN1	1.6878	0	0	300.487
TTC28	1.17127	0	0	298.544
UNC5D	1.71891	0	0	292.771
PANTR1	1.55785	0	0	284.397
MYT1L	1.01254	0	0	282.828
SLA	1.60219	0	0	273.392
TAFA1	1.81639	0	0	272.956
SLC22A23	1.40071	0	0	270.559
PTPRD	0.876485	0	0	260.152
ITPR1	1.88013	0	0	251.334
CLMP	1.46968	0	0	240.884
NHSL1	1.40959	0	0	234.65
RBFOX1	0.886499	0	0	234.198
CDH4	1.39668	0	0	231.754
ANKS1B	0.822923	0	0	228.353
RUNX1T1	1.24372	0	0	223.562
TMOD1	2.14211	0	0	222.51
NELL2	1.05471	0	0	220.596
CHN2	1.3259	0	0	220.559
DISP3	1.60654	0	0	220.319
SRGAP1	1.0265	0	0	219.866
DOK5	1.49759	0	0	217.084
DLGAP1	0.661714	0	0	216.726
AUTS2	0.512701	0	0	214.752
SORBS1	0.955963	0	0	213.956
DLGAP2	1.41109	0	0	212.763
MPPED1	1.12915	0	0	212.149
SEMA3C	1.50016	0	0	211.492
CCBE1	1.54211	0	0	211.377
CELF2	0.786167	0	0	208.568
PPFIA2	0.872729	0	0	200.46
TCF4	0.916389	0	0	200.054
DPY19L1	1.72394	0	0	198.798
FRMD4A	0.738695	0	0	198.613
RIMBP2	1.19916	0	0	197.703
GRAMD1B	1.11207	0	0	196.819
KCNK2	1.58498	0	0	195.226
SLC8A1	1.01258	0	0	194.265
SCHIP1	1.28423	0	0	194.012
PDE4D	0.832109	0	0	193.235
NCALD	1.18803	0	0	192.951
TIAM2	0.9003	0	0	191.776
KLHL29	1.12417	0	0	190.289
LINC01102	1.45877	0	0	189.41
GPM6A	0.806654	0	0	187.673
PTPRK	1.22828	0	0	186.036
LHX2	1.40604	0	0	185.373
PTPRO	0.914062	0	0	185.345
WWC1	1.2603	0	0	182.902
MIR3659HG	1.79527	0	0	182.644
ARPP21	0.946883	0	0	178.731
CCSER1	0.857006	0	0	178.014
RGL1	1.07914	0	0	177.966
FGF13	0.864048	0	0	175.289
ZSWIM6	0.896114	0	0	174.131
NTM	0.728607	0	0	171.655
PRSS12	1.95136	0	0	170.021
STMN2	1.01644	0	0	169.565
EXOC4	0.829002	0	0	169.357
NRP1	1.36224	0	0	168.89
GRM7	1.11974	0	0	167.514
ZNF804A	1.005	0	0	167.334
RBFOX3	0.834994	0	0	165.959
NEO1	1.00558	0	0	165.843
AFF2	1.03421	0	0	165.228
ENSG00000293110	1.56907	0	0	164.412
CORO2B	0.919861	0	0	163.45
LRP8	0.924529	0	0	162.96
EPS8	1.08239	0	0	162.486
FLRT2	0.958395	0	0	161.79
EPHA5	0.877165	0	0	161.204
ANK2	0.583614	0	0	160.808
SYBU	1.20408	0	0	158.462
B3GALT1	0.829138	0	0	158.037
MEIS2	0.854933	0	0	156.717
SORBS2	0.811036	0	0	156.572
KIF26B	1.00617	0	0	156.252
ENSG00000310368	2.11504	0	0	156.231
HIVEP2	0.894778	0	0	155.591
ADAMTSL3	1.31674	0	0	155.537
DNAH10	1.75039	0	0	155.108
PRKG2	1.46725	0	0	154.659
MCTP1	0.886353	0	0	154.109
ENSG00000303638	2.14026	0	0	153.961
CASC15	0.765685	0	0	153.599
ENSG00000296396	1.07572	0	0	153.583
RNF182	1.48835	0	0	152.56
AKT3	0.641126	0	0	150.184
NOL4	0.889153	0	0	148.062
ELAPOR1	1.12337	0	0	147.712
SHTN1	0.780915	0	0	147.565
LIMCH1	0.781217	0	0	147.251
MAPK8	0.704406	0	0	145.554
AFF3	0.55787	0	0	145.236
ADAMTS7	1.33745	0	0	144.008
PHACTR3	0.677593	0	0	142.069
ZEB2	0.727986	0	0	141.665
PAK5	0.771207	0	0	140.388
WDR86	1.05207	0	0	140.285
NDST3	1.28159	0	0	140.015
TMEM108	0.600771	0	0	139.885
TRPC5	1.33422	0	0	139.881
ST8SIA2	0.764921	0	0	138.65
HIVEP3	0.660351	0	0	138.256
CNR1	1.03247	0	0	137.717
SHB	0.944206	0	0	136.614
FAM13A	0.918589	0	0	136.083
HYCC1	1.16046	0	0	135.388
DOP1B	0.844361	0	0	135.293
ENSG00000236141	1.51767	0	0	134.248
DPYD	0.802596	0	0	134.052
ANKH	0.836362	0	0	133.378
ACTN2	1.40697	0	0	133.132
EML1	0.753385	0	0	133.097
CRMP1	0.681095	0	0	132.967
SNTG2	1.11965	0	0	132.852
NEDD4L	0.564589	0	0	132.65
PID1	0.893348	0	0	132.455
ST6GAL1	0.830647	0	0	131.924
SEMA6D	0.650254	0	0	131.33
ZBTB18	1.00255	0	0	130.928
SEZ6L	0.80079	0	0	130.86
PLXNA2	0.66892	0	0	130.639
KCNQ3	0.646775	0	0	129.618
TLE3	1.05978	0	0	129.36
MAN1C1	1.16873	0	0	129.323
CDH11	0.796615	0	0	128.603
ZNF608	0.806088	0	0	128.283
KCNQ5	0.861221	0	0	128.187
BCL6	1.43287	0	0	128.014
SH3PXD2A	0.734322	0	0	126.947
SOX11	0.842232	0	0	126.22
CAP2	0.845574	0	0	126.111
KALRN	0.418314	0	0	125.119
DRAXIN	1.12047	0	0	124.941
KLHL4	1.2978	0	0	124.277
HUNK	0.954253	0	0	124.119
POU3F2	1.14757	0	0	123.873
NFIX	0.633497	0	0	122.112
ADD2	0.669037	0	0	122.012
C1orf21	0.752018	0	0	120.798
ARHGAP21	0.573189	0	0	120.588
R3HDM1	0.700953	0	0	120.218
MEF2C	0.704648	0	0	119.364
GNAI1	0.876628	0	0	119.105
PTPRS	0.479225	0	0	118.339
NKAIN1	0.751521	0	0	118.243
ARL15	0.700385	0	0	117.976
CNTN4	0.821109	0	0	117.504
KCNQ2	0.676604	0	0	117.039
WNT5B	0.847032	0	0	116.533
PRSS23-AS1	1.2967	0	0	116.418
FMNL2	0.537392	0	0	116.073
DYNC1I1	0.693409	0	0	115.728
PALMD	1.19822	0	0	115.387
NFASC	0.563556	0	0	115.116
RAB12	1.08921	0	0	114.821
ZNF462	0.613505	0	0	113.621
CSRP2	1.22781	0	0	113.25
SORL1	0.825007	0	0	113.176
MB21D2	0.895526	0	0	112.366
THBS1	1.60084	0	0	112.155
SATB2-AS1	1.45565	0	0	110.514
LINC02197	1.53112	0	0	110.375
FGF12	0.657063	0	0	110.354
CEP85L	0.734443	0	0	109.654
STK32B	0.864356	0	0	109.26
SYT1	0.508253	0	0	108.972
CDH12	0.822223	0	0	108.503
RNF150	0.659137	0	0	108.079
KIF16B	0.824714	0	0	107.968
RTN4RL1	0.803686	0	0	107.648
MIR9-2HG	0.461561	0	0	107.225
CRACD	0.483651	0	0	107.214
MIR181A1HG	0.653829	0	0	106.565
ASXL3	0.593735	0	0	106.471
FAM149A	1.22518	0	0	106.255
TDRD7	1.1301	0	0	106.097
PCLO	0.564158	0	0	104.797
SH3RF3	0.606925	0	0	104.433
ST6GAL2	0.727559	0	0	104.385
HS3ST1	1.51718	0	0	103.533
RSPO3	1.51318	0	0	103.405
CAMK4	0.648388	0	0	103.4
SRRM4	0.519497	0	0	103.014
INHBA	2.05523	0	0	102.92
CPE	0.640736	0	0	102.351
DAB1	0.496179	0	0	102.294
KCTD16	0.836396	0	0	101.973
DPYSL2	0.484793	0	0	100.835
MIAT	0.519471	0	0	100.817
TNPO1	0.596053	0	0	100.447
CNKSR2	0.590757	0	0	100.225
PGAP1	0.641709	0	0	100.196
CEP170	0.517829	0	0	100.083
RASGEF1C	0.79896	0	0	99.5001
DLG2	0.41456	0	0	98.3449
ENSG00000259200	1.21512	0	0	98.3158
ENOX1	0.443967	0	0	98.1962
GRIA3	0.597487	0	0	97.841
HERC3	0.66849	0	0	97.5477
CTNNA2	0.416989	0	0	97.543
NWD2	0.953407	0	0	96.9871
ERICH1	0.668213	0	0	96.5735
ENSG00000271860	0.663511	0	0	96.4985
SH3GL3	0.602576	0	0	96.1961
LNX1	0.958525	0	0	96.1331
ZC2HC1A	0.640357	0	0	96.0742
ROBO2	0.40585	0	0	96.0251
PTPN2	0.825243	0	0	95.5901
ST3GAL6	0.911867	0	0	94.4778
ATP8A2	0.529942	0	0	94.2717
RALGPS1	0.474261	0	0	94.0541
ENSG00000306888	2.12515	0	0	93.9278
GRIA1	0.458597	0	0	93.8389
PTPN4	0.557386	0	0	93.7307
ELL2	1.0569	0	0	93.3047
ENSG00000253901	1.61646	0	0	93.281
PLCL1	0.570673	0	0	93.2197
APP	0.489982	0	0	92.7553
IGF1R	0.393667	0	0	92.3112
SNX7	0.761205	0	0	92.2918
BASP1	0.5031	0	0	92.1917
PPP2R2B	0.454214	0	0	91.2605
MDGA1	0.806004	0	0	91.0459
TOP6BL	0.512763	0	0	91.0069
TNIK	0.456566	0	0	89.7105
GPR158	0.929687	0	0	89.6654
SMPD3	0.60339	0	0	89.5666
SRGAP3	0.417699	0	0	89.4675
LINC01551	0.692169	0	0	89.4514
NRG1	0.489355	0	0	89.3104
NEUROD6	0.92298	0	0	88.6502
DIP2C	0.315447	0	0	88.5046
PPP1R14C	0.934023	0	0	88.4219
MACO1	0.579877	0	0	88.3277
NCOA1	0.442549	0	0	88.1904
MIRLET7BHG	0.521717	0	0	87.9645
DPP6	0.465658	0	0	87.9223
ZNF124	0.651538	0	0	87.4338
RNF130	0.358937	0	0	87.2646
CRHR1	1.21867	0	0	87.0695
VSTM2B-DT	0.8086	0	0	87.0258
UNC5A	0.755691	0	0	86.849
ENSG00000286375	1.78259	0	0	86.5454
HECTD4	0.40915	0	0	86.2422
ENSG00000294998	0.950266	0	0	86.1562
ITPRID1	1.62438	0	0	85.8546
MAPT	0.424525	0	0	85.8356
KREMEN1	1.02914	0	0	85.65
LINC02885	1.13977	0	0	85.4839
DSCAM	0.430791	0	0	85.454
ENC1	0.764188	0	0	85.4438
EPHB6	1.03831	0	0	85.4378
CACNA1I	1.08622	0	0	85.1724
EDIL3	0.699982	0	0	84.9017
MYO1D	0.526484	0	0	84.7819
GLRA2	0.637893	0	0	84.6212
PDE10A	0.463939	0	0	84.5853
TSPAN14	0.618217	0	0	84.534
FSD1L	0.507287	0	0	84.5193
PPFIBP1	0.683754	0	0	84.3987
JMJD1C	0.339154	0	0	84.3127
SETD7	0.82557	0	0	84.0034
CERS6	0.40549	0	0	83.9121
CCDC88C	0.730752	0	0	83.7467
MITA1	1.64785	0	0	83.4394
CBLN2	1.3058	0	0	83.279
PHACTR1	0.348604	0	0	83.1674
NCK2	0.530736	0	0	83.0835
PGBD5	0.660048	0	0	82.927
KIAA1549L	0.446035	0	0	82.9222
HSP90AA1	0.5079	0	0	82.8666
LINC01122	0.425889	0	0	82.7987
IGDCC3	0.688188	0	0	82.5015
SLC38A1	0.481576	0	0	82.2588
MTCL3	0.521949	0	0	82.251
INPP5F	0.591422	0	0	82.2234
ENSG00000257522	0.759746	0	0	82.0843
ADGRL3	0.408469	0	0	82.0639
MIR100HG	0.430084	0	0	81.9754
SEMA3A	0.590907	0	0	81.9453
ENSG00000231557	1.54334	0	0	81.8414
FRMPD4	0.53459	0	0	81.7597
POU3F3	0.642136	0	0	81.417
ENSG00000258107	1.64052	0	0	81.2894
ZNF423	0.587006	0	0	81.2316
TTLL7	0.458178	0	0	81.1632
FRMD5	0.453198	0	0	81.141
DPYSL3	0.425717	0	0	81.0723
SH3BGRL2	0.511499	0	0	80.9166
KDM4B	0.433273	0	0	80.8819
TRIM2	0.390314	0	0	80.6327
RNF24	0.508302	0	0	80.3746
CACNA1B	0.391131	0	0	80.1579
ERC2	0.360284	0	0	79.5546
ESYT2	0.546236	0	0	79.5483
LMO4	0.794116	0	0	79.5161
CHD3	0.433617	0	0	79.1328
RFX3	0.454932	0	0	78.9632
MAP4K4	0.363825	0	0	78.6918
PLPPR1	0.418874	0	0	78.4138
ENSG00000287120	2.18909	0	0	78.2713
KIAA0319	0.57717	0	0	78.1206
PBX1	0.31022	0	0	77.9612
ENSG00000254599	1.44109	0	0	77.9262
OSBPL5	0.57275	0	0	77.7897
HS6ST3	0.558698	0	0	77.0192
CTTNBP2	0.419092	0	0	76.9865
ENSG00000225421	1.52108	0	0	76.6075
PLPPR5	0.605949	0	0	76.4608
SLC2A13	0.595006	0	0	76.1102
WNK2	0.419692	0	0	75.8865
CBLB	0.467216	0	0	75.8733
FDFT1	0.616918	0	0	75.4876
HECW1	0.379659	0	0	75.3895
CBFA2T2	0.446791	0	0	75.2827
ENSG00000297398	1.29092	0	0	75.2447
FTX	0.266276	0	0	75.2262
SRM	1.01985	0	0	75.0409
LRFN2	0.541629	0	0	74.8735
NTF3	1.43316	0	0	74.8274
PLPPR4	0.531659	0	0	74.63
LEMD1	0.699097	0	0	74.573
GPR137B	0.61485	0	0	74.5215
WDR20	0.563769	0	0	74.3747
RTN4	0.405186	0	0	74.3217
LETR1	0.95487	0	0	74.1791
SLC17A6	1.17523	0	0	74.0798
NEUROD2	0.74599	0	0	74.0577
ENSG00000287249	1.26974	0	0	74.0539
EPCAM-DT	0.561867	0	0	74.0271
FNBP1L	0.319605	0	0	73.979
GLIS3	0.760137	0	0	73.9344
SHC3	0.522523	0	0	73.7846
PSMG2	0.619309	0	0	73.4126
PALS2	0.501724	0	0	73.3221
JAK1	0.501707	0	0	73.176
PKIA	0.574798	0	0	72.798
TMTC1	0.597483	0	0	72.7641
SCRT2	0.83465	0	0	72.6242
PTPRN2	0.305962	0	0	72.4424
RTN4RL2	1.31485	0	0	72.1136
MIR124-1HG	0.481554	0	0	72.098
ADCY1	0.471247	0	0	71.9544
SHANK2	0.352458	0	0	71.847
DPYSL5	0.405453	0	0	71.7906
MIR124-2HG	0.528725	0	0	71.7887
MMP17	0.768344	0	0	71.6655
STXBP5	0.421188	0	0	71.5798
NALF1	0.330072	0	0	71.4535
EPHA6	0.492893	0	0	71.4455
PCDHA6	0.464843	0	0	71.4198
STXBP1	0.409091	0	0	71.336
RASSF2	0.755423	0	0	71.3242
ENSG00000233891	1.21685	0	0	70.9651
CTIF	0.347115	0	0	70.9556
NECAB1	0.835218	0	0	70.8475
KIF5C	0.355781	0	0	70.5143
NBEA	0.272474	0	0	70.0691
BHLHE22	1.19757	0	0	70.0353
ATP11C	0.521203	0	0	70.0029
MAP1B	0.282465	0	0	70.0007
NRXN1	0.240653	0	0	69.9288
SLCO3A1	0.444875	0	0	69.8872
VSTM2L	0.619456	0	0	69.6676
TTC3	0.278071	0	0	69.4267
ENSG00000297299	1.5303	0	0	69.268
OBSCN	0.474381	0	0	68.7724
ANKRD44	0.377566	0	0	68.7581
UST	0.623275	0	0	68.5803
DYNC1H1	0.375866	0	0	68.5539
CELF2-DT	1.05287	0	0	68.5415
PPFIBP2	0.910264	0	0	68.3913
MCF2L	0.405158	0	0	68.1299
DOK6	0.371303	0	0	67.8891
NOL4L	0.458883	0	0	67.5992
SMARCC1	0.345601	0	0	67.5218
MAP6	0.422916	0	0	67.2644
ENSG00000302630	2.37964	0	0	67.0588
EPHA4	0.556474	0	0	66.7811
ENSG00000305466	1.21477	0	0	66.6578
TMEM72-AS1	0.621549	0	0	66.5465
MARK1	0.345183	0	0	66.4076
GPC2	0.711786	0	0	66.3171
KLHL8	0.717679	0	0	66.2846
FAM117B	0.422364	0	0	66.0688
KIAA0408	0.445003	0	0	65.9018
PLCB1	0.353269	0	0	65.8959
FGD4	0.433182	0	0	65.7881
INPP4A	0.367683	0	0	65.6553
DTNA	0.468078	0	0	65.5553
RORB	0.557638	0	0	65.5473
ENSG00000309730	1.97976	0	0	65.5331
SSX2IP	0.586156	0	0	65.2457
ENSG00000295078	0.843361	0	0	65.1918
MACF1	0.186939	0	0	65.1135
QSOX1	0.630044	0	0	64.9983
SPTAN1	0.314692	0	0	64.8748
KCND2	0.434415	0	0	64.7638
RAPGEF2	0.35756	0	0	64.3806
UBA6-DT	0.3931	0	0	64.3404
LPL	0.958751	0	0	64.163
VLDLR-AS1	0.416736	0	0	64.0539
ARHGEF3	0.596832	0	0	64.003
MIR137HG	0.453971	0	0	63.8394
KLF7	0.382551	0	0	63.7994
BCL11A	0.351759	0	0	63.7264
GAB2	0.400978	0	0	63.6752
PREX1	0.501403	0	0	63.6397
ENSG00000289363	1.34969	0	0	63.5943
SCUBE1	0.432179	0	0	63.3909
MAP3K13	0.438296	0	0	63.3295
CYRIB	0.394548	0	0	62.9873
CDKL5	0.413897	0	0	62.8166
RERE	0.234577	0	0	62.5606
UBR5	0.318818	0	0	62.5089
IL7	1.07748	0	0	62.4749
GPR137C	0.417106	0	0	62.4675
MYO16	0.395737	0	0	62.3516
TGFBR1	0.540106	0	0	62.2659
CAMK1D	0.32624	0	0	62.0713
SLC4A7	0.45456	0	0	62.0701
ARFGEF3	0.425996	0	0	62.0178
ENSG00000227486	0.382126	0	0	62.0162
BSN	0.450099	0	0	61.7942
KCNH5	0.754161	0	0	61.7445
CRIM1	0.47209	0	0	61.6998
EZR	0.545319	0	0	61.4293
ZBTB46	0.503564	0	0	61.2414
ENSG00000100101	0.430397	0	0	61.164
NLGN4X	0.39425	0	0	61.0589
SCN3A	0.353559	0	0	60.8413
ENSG00000286044	0.845174	0	0	60.7646
L3MBTL3	0.696259	0	0	60.527
GTDC1	0.380623	0	0	60.4785
ZNF337	0.472019	0	0	60.4349
SNCA	0.606454	0	0	60.4254
ADCYAP1R1	0.481895	0	0	60.3858
RAI2	0.669639	0	0	60.3678
SLC19A4P-1	1.78117	0	0	60.1897
TMEM150C	0.514108	0	0	60.1357
MAST1	0.37367	0	0	60.1256
SDCBP	0.720197	0	0	60.1098
SERPINE2	0.854342	0	0	60.1047
PDE7A	0.398448	0	0	59.7797
NPSR1-AS1	1.25707	0	0	59.7761
ENSG00000264449	0.549219	0	0	59.661
BCL9	0.452887	0	0	59.5325
RANBP9	0.460465	0	0	59.4972
FOXN3	0.291079	0	0	59.4553
PPP2R5E	0.36261	0	0	59.3565
ZC4H2	0.373168	0	0	59.0122
SPTBN2	0.448662	0	0	58.9279
GPR85	1.02822	0	0	58.9171
CLVS1	0.357676	0	0	58.8116
APC2	0.404209	0	0	58.7615
GFOD1	0.422445	0	0	58.7317
ENSG00000299250	0.365393	0	0	58.6892
DYNC1I2	0.361286	0	0	58.5357
EVL	0.29346	0	0	58.439
KLHL25	0.483509	0	0	58.4336
LYPD6	0.630045	0	0	58.3752
LAMB1	0.660921	0	0	58.1538
TUBA1C	0.750915	0	0	58.1281
CCNT2-AS1	0.555277	0	0	58.0556
SESN1	0.500439	0	0	57.9048
MTCL1	0.433946	0	0	57.7269
KIDINS220	0.300738	0	0	57.6044
LINC03022	0.528172	0	0	57.389
PTBP2	0.31292	0	0	57.2329
FBXL2	0.355034	0	0	57.1848
ENSG00000296329	0.544485	0	0	57.1005
ANTXR2	0.648612	0	0	57.0827
EMID1	0.428943	0	0	57.0328
CERK	0.479332	0	0	57.0305
RSU1	0.465845	0	0	56.993
ZNF254	0.338067	0	0	56.8939
NSG1	0.528591	0	0	56.8716
CELF3	0.506191	0	0	56.7949
ELF2	0.342421	0	0	56.7567
SNCAIP	0.403915	0	0	56.7154
TAFA5	0.310372	0	0	56.6608
MYO5B	0.41767	0	0	56.6207
PLPPR5-AS1	0.468307	0	0	56.6144
BICD1	0.266028	0	0	56.5487
FAM124A	0.563662	0	0	56.5458
ENSG00000289328	1.45734	0	0	56.5209
DCX	0.353561	0	0	56.4532
LSS	0.424604	0	0	56.4391
RNF144A	0.366175	0	0	56.4238
KIF21B	0.377838	0	0	56.3733
PRDM8	0.640859	0	0	56.3408
KIF3C	0.358005	0	0	56.2831
GPR173	0.414011	0	0	56.2777
FHDC1	0.838644	0	0	56.2743
L1CAM	0.432963	0	0	56.0812
ENSG00000258077	0.964179	0	0	55.9321
ANTXR1	0.346156	0	0	55.8849
ENSG00000253577	1.31373	0	0	55.7478
FOXG1	0.400348	0	0	55.699
PPP2R3A	0.353465	0	0	55.6438
AFAP1	0.360329	0	0	55.5616
TBL1XR1	0.31672	0	0	55.4757
YWHAZ	0.435832	0	0	55.4335
RFLNA	0.340345	0	0	55.3721
DCLK3	1.31187	0	0	55.2029
NEUROG2-AS1	0.636059	0	0	55.1405
ENSG00000289217	1.13188	0	0	55.1162
CLIP2	0.290614	0	0	55.1128
CCDC3	0.461361	0	0	55.0182
JAKMIP1	0.409042	0	0	55.0108
KIAA0513	0.507032	0	0	54.9376
SEMA6C	0.605776	0	0	54.8699
ST3GAL1	0.368315	0	0	54.8378
DTNB	0.325116	0	0	54.748
CATSPERG	0.457925	0	0	54.7145
KHDRBS2	0.302973	0	0	54.685
MYL2	1.17054	0	0	54.5629
SEZ6	0.36172	0	0	54.5422
CACNA1H	0.530049	0	0	54.4708
SNX25	0.417255	0	0	54.4574
DUBR	0.481298	0	0	54.4334
MICAL3	0.26066	0	0	54.4185
CELF5	0.307705	0	0	54.3689
ENSG00000287045	0.585304	0	0	54.2799
KLHL24	0.43758	0	0	54.2582
SREBF2	0.303194	0	0	54.256
ENSG00000296415	0.982338	0	0	54.1612
REEP1	0.329621	0	0	54.1339
CSNK1A1	0.351928	0	0	54.1159
ICA1L	0.349044	0	0	54.0655
CCND3	0.783807	0	0	53.7132
ENSG00000259543	0.415863	0	0	53.6274
GPR161	0.384585	0	0	53.5989
ENSG00000266302	0.481977	0	0	53.5964
SYNE1	0.315919	0	0	53.5647
B4GALT5	0.454191	0	0	53.492
LINC01606	0.746162	0	0	53.4232
SVIL-AS1-1	0.346523	0	0	53.2858
TUBA1A	0.449243	0	0	52.7742
MICAL1	0.42132	0	0	52.7728
ENSG00000288591	0.593566	0	0	52.7492
DTD1	0.405183	0	0	52.6726
FGF9	0.735155	0	0	52.4517
SEC63	0.336289	0	0	52.3659
CASTOR3P-1	0.291515	0	0	52.3421
ENSG00000296764	1.53346	0	0	52.2749
SYT4	0.757895	0	0	52.1729
LRGUK	0.601115	0	0	52.159
TMEFF1	0.338673	0	0	52.0483
TRIO	0.192407	0	0	51.9998
APBA2	0.296241	0	0	51.9453
PITPNM2	0.409649	0	0	51.926
SGPL1	0.51561	0	0	51.915
ADGRG2	1.153	0	0	51.8718
ENSG00000255330	0.560434	0	0	51.85
ATP9A	0.292063	0	0	51.6977
IGFBPL1	0.71348	0	0	51.4079
GFRA2	0.574711	0	0	51.2662
TMEM185A	0.673629	0	0	51.2208
PHF14	0.270338	0	0	51.2137
ELMOD1	0.395151	0	0	51.1472
FHOD3	0.252053	0	0	51.1022
MAGI3	0.301623	0	0	51.0737
LINC01440	1.17242	0	0	50.9505
CPNE8	0.636452	0	0	50.8919
BACH1	0.365511	0	0	50.8759
SLCO5A1	0.361071	0	0	50.704
CHRDL1	0.723788	0	0	50.7028
RBFOX2	0.23661	0	0	50.6961
ENSG00000261451	0.5595	0	0	50.3589
DNAAF9	0.245322	0	0	50.3581
MARCHF1	0.308209	0	0	50.2891
MYO10	0.409123	0	0	50.2593
LIN7A	0.420558	0	0	50.1229
FBN3	0.308694	0	0	49.8535
MEX3A	0.451102	0	0	49.8035
NTSR1	0.639708	0	0	49.7608
KDM5B	0.331363	0	0	49.6912
CDK19	0.322359	0	0	49.6433
ZNF33A	0.382839	0	0	49.5666
SMYD2	0.563731	0	0	49.5245
OLFM2	0.283412	0	0	49.4942
ZNF286A	0.579938	0	0	49.4756
OSBP2	0.295421	0	0	49.4687
PRKX	0.470956	0	0	49.4076
FAM228B	0.338775	0	0	49.2962
FOXP4	0.55489	0	0	49.0664
BMPR2	0.225636	0	0	48.8336
ZNF69	0.329746	0	0	48.8244
EXOC2	0.347212	0	0	48.6685
HERC1	0.231447	0	0	48.5596
ENSG00000294893	0.966075	0	0	48.4671
ZNF292	0.252326	0	0	48.372
CLASP2	0.216083	0	0	48.3618
ITPR2	0.427461	0	0	48.3271
TSPAN18	0.337471	0	0	48.283
GSK3B	0.265154	0	0	48.2656
FGFR2	0.397321	0	0	48.1663
CCNG2	0.499718	0	0	48.1124
RAB33B-AS1	0.366829	0	0	48.0281
ABCB9	0.472233	0	0	47.9611
UNC13A	0.328688	0	0	47.9332
MSMO1	0.461822	0	0	47.8519
CEP95	0.295884	0	0	47.8473
COTL1	0.510804	0	0	47.7944
KLHL35	0.830862	0	0	47.7831
SH2D4B	0.773086	0	0	47.7643
ENSG00000255872	0.542013	0	0	47.7029
NMNAT2	0.258062	0	0	47.5233
TMEM135	0.381915	0	0	47.5048
PRAG1	0.475417	0	0	47.5044
ENSG00000269707	0.496591	0	0	47.4626
MOK	0.367005	0	0	47.4408
ARHGEF26-AS1	0.716624	0	0	47.2542
HMGCR	0.495818	0	0	47.1996
LRCH1	0.287572	0	0	47.1744
SRGAP2C	0.373758	0	0	47.0577
SMARCD3	0.355403	0	0	47.0083
KCNN3	0.347355	0	0	46.9437
USP46	0.519753	0	0	46.9225
ENSG00000229588	0.554786	0	0	46.9133
ELOVL6	0.372835	0	0	46.8878
TNRC6B	0.230891	0	0	46.8812
COL9A2	0.862045	0	0	46.7712
SPATS2	0.302771	0	0	46.7251
NEFM	0.591804	0	0	46.7179
SRGAP2	0.278744	0	0	46.6758
CCDC112	0.357148	0	0	46.5597
ENSG00000300769	1.36612	0	0	46.4544
ENSG00000256218	1.59402	0	0	46.3992
ATP6V0A2	0.447514	0	0	46.3607
CELSR2	0.444355	0	0	46.3558
NAV1	0.236156	0	0	46.2538
ENSG00000289420	1.26527	0	0	46.2338
ENSG00000287636	1.0384	0	0	46.1867
FNBP1	0.276641	0	0	46.1415
ZNF91	0.255944	0	0	46.1195
BRSK2	0.360326	0	0	46.0306
ANO10	0.30455	0	0	45.919
EXTL3	0.389326	0	0	45.8915
FOXP1	0.284457	0	0	45.8793
KIF21A	0.240693	0	0	45.8277
SHF	0.433908	0	0	45.8135
CELSR3	0.416262	0	0	45.7372
LPP	0.322418	0	0	45.7346
ARK2C	0.299814	0	0	45.6792
FERMT2	0.434694	0	0	45.6088
GNG2	0.302998	0	0	45.4866
JPT1	0.40155	0	0	45.4478
HEATR1	0.411133	0	0	45.2951
ENSG00000277855	0.861729	0	0	45.2616
STK40	0.492848	0	0	45.256
VLDLR	0.531163	0	0	45.2175
FAM78B	0.419695	0	0	45.1781
ACAP3	0.324014	0	0	45.1156
DENND1A	0.244302	0	0	45.0695
PTPN13	0.380048	0	0	45.0204
SNAP91	0.246987	0	0	44.9936
KDM6B	0.375555	0	0	44.9507
BEGAIN	0.439337	0	0	44.9206
FOXO3	0.362192	0	0	44.9017
IRS1	0.577425	0	0	44.6484
SLK	0.445882	0	0	44.6406
RBM24	1.24257	0	0	44.6385
KCNN1	0.544463	0	0	44.6071
OTULINL	0.836117	0	0	44.6048
DGCR5	0.271688	0	0	44.5728
FOXG1-AS1	0.435984	0	0	44.4239
SLC1A2	0.285933	0	0	44.4213
RETREG1	0.333941	0	0	44.3447
SPTBN1	0.226177	0	0	44.2628
AHDC1	0.286215	0	0	44.2423
MRTFA	0.260345	0	0	44.2243
TTYH2	0.679982	0	0	44.1507
CTBP2	0.240612	0	0	44.0803
ENSG00000306749	0.382699	0	0	44.0487
SMAD2	0.324939	0	0	43.9923
SHANK1	0.278216	0	0	43.9568
PSD3	0.242737	0	0	43.9394
ASAP2	0.248898	0	0	43.9147
GAL3ST4	0.807179	0	0	43.8757
FNIP2	0.370226	0	0	43.701
B3GAT1-DT	0.364276	0	0	43.6799
DBN1	0.347815	0	0	43.645
MGAT5	0.27123	0	0	43.5765
PTPRE	0.372878	0	0	43.5005
GCNT1	0.742929	0	0	43.4869
CLASP1	0.201042	0	0	43.4789
PNPLA3	0.581243	0	0	43.3926
CLVS2	0.373886	0	0	43.3723
ENSG00000298336	1.16126	0	0	43.2674
ZNF33B	0.359752	0	0	43.2498
MVD	0.475344	0	0	43.2406
PUM1	0.249434	0	0	43.1437
RAP1GDS1	0.293977	0	0	43.1401
KIF5A	0.316214	0	0	43.1092
FYN	0.220678	0	0	43.0733
YEATS2	0.243895	0	0	43.0661
USP31	0.372943	0	0	43.0531
FZD4	1.08183	0	0	43.0222
LINC02177	0.506857	0	0	43.016
FAM110B	0.283686	0	0	42.9478
HEBP2	0.797507	0	0	42.9259
PAK3	0.229363	0	0	42.9059
CHN1	0.349718	0	0	42.8783
BRAF	0.244888	0	0	42.8641
TOP2B	0.269305	0	0	42.8628
LRP12	0.374499	0	0	42.8391
ENSG00000309565	1.28187	0	0	42.8075
LINC00951	0.664455	0	0	42.6567
NRN1	0.662328	0	0	42.6365
PTPN12	0.282009	0	0	42.6178
PCDH11X	0.268991	0	0	42.5985
TRIOBP	0.311867	0	0	42.4546
DNER	0.290824	0	0	42.4472
MAD2L2	0.434144	0	0	42.4366
LINC02975	0.825735	0	0	42.4363
EPC1	0.259614	0	0	42.3599
CAMK2B	0.323631	0	0	42.2664
GATAD2B	0.23707	0	0	42.2443
CCSER2	0.264385	0	0	42.2265
GJC1	0.371771	0	0	42.1658
AKAIN1	1.52464	0	0	42.163
DLG3	0.321786	0	0	42.0262
AP3S1	0.372053	0	0	41.9725
IQGAP1	0.356324	0	0	41.9521
ABHD6	0.411624	0	0	41.948
PUM2	0.241652	0	0	41.9427
UGGT2	0.268992	0	0	41.925
RTN2	0.457257	0	0	41.9228
IRS2	0.464959	0	0	41.9047
ENSG00000254706	0.743798	0	0	41.7926
ENSG00000204422	0.991841	0	0	41.7503
FRMD3	0.26565	0	0	41.7111
ACVR1C	0.784236	0	0	41.6659
EPB41	0.309485	0	0	41.5559
FBXO11	0.226433	0	0	41.4828
AP3B2	0.266285	0	0	41.4442
ENSG00000253452	0.970751	0	0	41.442
ZSCAN2	0.540385	0	0	41.3252
NKAIN3	0.215134	0	0	41.2875
UNC79	0.220038	0	0	41.2689
NUMBL	0.410314	0	0	41.2598
WDR47	0.323118	0	0	41.2273
ENSG00000288061	0.78107	0	0	41.1721
BTBD10	0.334443	0	0	41.0947
STMN4	0.425505	0	0	40.9021
ENAH	0.253395	0	0	40.8206
HPCAL1	0.415354	0	0	40.794
FAM13A-AS1	0.515914	0	0	40.7528
ENSG00000309946	0.468719	0	0	40.7474
PFKFB3	0.366464	0	0	40.6538
SLCO5A1-AS1	0.427243	0	0	40.6248
ENSG00000285253	0.33327	0	0	40.6149
HDAC5	0.314953	0	0	40.6042
CELF2-AS2	0.714878	0	0	40.5911
GPM6B	0.252967	0	0	40.5882
ENSG00000223726	1.57994	0	0	40.5187
MED27	0.311828	0	0	40.5132
CHST8	0.529121	0	0	40.5037
IL12RB2	1.02431	0	0	40.4924
SULT4A1	0.376538	0	0	40.4327
NIBAN2	0.449999	0	0	40.4288
ENSG00000285755	0.568942	0	0	40.4243
GAP43	0.284103	0	0	40.3775
ENSG00000270207	0.707347	0	0	40.3389
JUP	0.443459	0	0	40.2946
MCM3AP-AS1	0.325152	0	0	40.2784
GPHN	0.180663	0	0	40.2619
ENSG00000304495	1.23654	0	0	40.2351
AGAP3	0.296645	0	0	40.2192
SLAIN2	0.342975	0	0	40.2154
NTNG2	0.589889	0	0	40.1415
TG	0.668612	0	0	40.0798
ENSG00000304623	1.39202	0	0	40.0128
MED13L	0.194103	0	0	39.9972
TCF12	0.211742	0	0	39.8146
PANK3	0.363694	0	0	39.6907
ARFGEF1	0.242479	0	0	39.674
DCDC2C	0.735478	0	0	39.6301
LINC02938	1.09098	0	0	39.5769
RHOU	0.91069	0	0	39.345
VEZT	0.250737	0	0	39.2118
ATP7B	0.445926	0	0	39.2042
PRDM8-AS1	0.631504	0	0	39.1777
PGM2L1	0.33471	0	0	39.1525
BTBD8	0.364517	0	0	39.1467
IL17RD	0.401318	0	0	39.0778
TMEM120B	0.314079	0	0	39.0633
EML6	0.35241	0	0	39.0168
ENSG00000298702	0.392634	0	0	38.9413
TBC1D30	0.384695	0	0	38.7325
BMAL2	0.446584	0	0	38.6997
PRSS23	0.492443	0	0	38.6844
MATCAP2	0.59066	0	0	38.5874
ISLR2	0.447117	0	0	38.5472
MCHR2	1.22128	0	0	38.5316
LINC02930	0.610138	0	0	38.5166
KLHL23	0.286304	0	0	38.4937
VASH1	0.331037	0	0	38.4112
TULP4	0.199458	0	0	38.3967
BMT2	0.301336	0	0	38.3269
EFCAB6-AS1	0.884203	0	0	38.2964
LINC01923	1.38203	0	0	38.2778
RALGDS	0.269742	0	0	38.273
ANO3	0.67322	0	0	38.1684
OPTN	0.386081	0	0	38.1174
ENSG00000225689	0.2498	0	0	38.1059
ENSG00000297805	0.509009	0	0	38.0987
ZFP90	0.264184	0	0	38.0144
ZFAND5	0.424817	0	0	38.0058
ATP1B3	0.305807	0	0	37.9775
CELF2-AS1	0.5552	0	0	37.8993
ALPK1	0.543893	0	0	37.891
ADAMTS10	0.270299	0	0	37.8895
CORO1C	0.308887	0	0	37.885
EMX1	0.493965	0	0	37.8654
ENSG00000287117	0.366607	0	0	37.8132
GTF2I	0.228041	0	0	37.7479
VSTM2B	0.401643	0	0	37.7154
CEP126	0.340126	0	0	37.6848
FAM107B	0.302517	0	0	37.6175
KIAA1549	0.223969	1.70703e-307	1.25782e-306	37.5079
LOXL3	0.4669	5.51641e-307	4.05955e-306	37.477
ZBED4	0.308874	6.75305e-307	4.96642e-306	37.4713
SOX5	0.163602	6.49354e-306	4.76794e-305	37.4115
TXK	1.14469	9.79306e-306	7.17919e-305	37.4026
LRRN3	0.536865	9.2818e-306	6.80873e-305	37.4016
JARID2	0.242064	1.13158e-305	8.29281e-305	37.3957
MYLIP	0.792277	5.34158e-305	3.90838e-304	37.3554
ENSG00000286775	1.31477	8.34141e-305	6.09944e-304	37.3468
NR2F1-AS1	0.244085	1.20879e-303	8.80817e-303	37.2703
CTTNBP2NL	0.329824	1.41697e-303	1.03218e-302	37.2662
NETO2	0.260172	2.12623e-303	1.54786e-302	37.2552
CCDC144A	0.447151	5.05452e-302	3.66338e-301	37.1704
GREM1	1.75832	8.03968e-302	5.8251e-301	37.164
PLPP4	0.620419	1.16639e-301	8.44831e-301	37.1482
GRID1	0.212309	1.73652e-301	1.257e-300	37.1365
KCNMB4	0.329127	5.71272e-301	4.1313e-300	37.1046
LGALS8	0.56721	7.39164e-301	5.3421e-300	37.0981
PHACTR4	0.219838	2.34614e-300	1.69241e-299	37.0663
GALNT2	0.25232	1.32117e-298	9.50956e-298	36.9572
ENSG00000198211	0.41708	2.4697e-298	1.77487e-297	36.9406
ENSG00000285955	1.25585	1.26363e-297	9.07552e-297	36.9002
GRP	1.32205	1.52194e-297	1.09273e-296	36.8946
BACH2	0.177047	7.11212e-297	5.09684e-296	36.849
ENSG00000300731	1.25878	1.56274e-295	1.11679e-294	36.7686
CNTN3	0.277438	1.38077e-295	9.87362e-295	36.7684
GPRIN1	0.385334	1.60634e-293	1.14404e-292	36.6387
BZW2	0.372538	5.29614e-292	3.75911e-291	36.543
ENSG00000296852	0.64625	6.6067e-291	4.6749e-290	36.4745
CYRIA	0.249897	4.38523e-289	3.09347e-288	36.3581
ZFAND3	0.175988	5.06651e-289	3.57297e-288	36.3541
ACAT2	0.381994	1.26746e-287	8.90827e-287	36.2656
DISP1	0.276478	3.80222e-287	2.66991e-286	36.235
MEIS3	0.281119	4.48836e-285	3.13735e-284	36.1029
DHCR24	0.458011	4.91613e-284	3.42595e-283	36.0368
CNKSR3	0.361159	6.62887e-282	4.59723e-281	35.9
RP9P	0.367367	4.937e-281	3.41771e-280	35.8439
AACS	0.308266	7.42328e-281	5.13732e-280	35.8324
FOXO3B	0.654499	1.40256e-280	9.70359e-280	35.8155
SCNN1G	1.52211	2.90695e-280	2.00875e-279	35.7997
IGSF3	0.277922	1.20534e-279	8.32408e-279	35.7544
PALM	0.255742	2.15398e-279	1.48575e-278	35.7381
ADAM22	0.266219	1.05471e-278	7.26854e-278	35.6935
LRRN1	0.328761	5.00669e-277	3.43288e-276	35.5851
RALYL	0.20892	8.54832e-277	5.85599e-276	35.5699
HDX	0.307402	2.80173e-276	1.91817e-275	35.5367
ATXN1	0.193934	3.01956e-276	2.06669e-275	35.5344
MIR17HG	0.519341	1.83101e-275	1.25023e-274	35.4841
LINC01503	1.14167	5.10195e-275	3.48262e-274	35.4577
MYCN	0.669156	1.96902e-274	1.34128e-273	35.4174
NPY1R	0.856756	2.48843e-273	1.69009e-272	35.3461
HMGCS1	0.318064	3.24388e-273	2.20187e-272	35.3372
ANKRD13B	0.302633	1.1357e-272	7.69749e-272	35.3017
CSGALNACT2	0.304524	2.6506e-272	1.79493e-271	35.2777
GPR153	0.493923	2.01571e-271	1.36179e-270	35.2205
FAM241A	0.575011	4.17513e-271	2.81818e-270	35.1998
TFDP2	0.226004	4.35473e-271	2.93855e-270	35.198
PTK2B	0.493537	4.52811e-271	3.05465e-270	35.1973
ENSG00000259460	0.355879	9.60224e-271	6.46815e-270	35.1757
ARHGEF2	0.289847	2.81398e-270	1.89331e-269	35.145
ELAVL3	0.190793	5.12328e-270	3.44503e-269	35.1278
FCHO2	0.250253	9.32819e-268	6.25242e-267	34.9791
BCAP29	0.403493	1.33907e-267	8.97279e-267	34.969
EPB41L5	0.236394	2.21422e-266	1.47981e-265	34.8884
REEP3	0.373678	2.83835e-266	1.89638e-265	34.8814
MEGF9	0.238513	4.94463e-266	3.30269e-265	34.8653
PRKAG2	0.258988	7.73032e-266	5.15885e-265	34.8525
RYR2	0.23794	2.21383e-265	1.47655e-264	34.8222
ATF7	0.281075	2.36898e-265	1.57957e-264	34.8203
SGCG	0.94656	1.40245e-264	9.32143e-264	34.7707
DDAH2	0.518238	3.20012e-264	2.12574e-263	34.7459
MAP2	0.133805	5.13769e-264	3.40985e-263	34.7316
MAPRE2	0.234363	8.71488e-264	5.78068e-263	34.7164
PPEF1	0.627775	1.0693e-263	7.08663e-263	34.7112
CDK5R1	0.483078	2.14295e-263	1.41899e-262	34.6908
NPTXR	0.413279	2.53673e-262	1.67443e-261	34.6193
PDE9A	0.196922	2.63742e-262	1.7404e-261	34.6179
ASNS	0.397155	9.57141e-262	6.31241e-261	34.5809
SLITRK5	0.392936	2.78248e-261	1.83349e-260	34.5499
ENSG00000273209	0.693466	3.28951e-261	2.16697e-260	34.5461
UACA	0.370928	6.56483e-261	4.31964e-260	34.5248
SEMA7A	0.532313	1.38339e-260	9.09229e-260	34.5037
PIK3CA	0.271814	2.37976e-260	1.56274e-259	34.4875
CAMSAP1	0.217808	4.5243e-260	2.96933e-259	34.4688
ERC1	0.16319	3.5814e-259	2.34648e-258	34.4086
PPP1R17	0.745583	4.66009e-259	3.05235e-258	34.4025
SIPA1L3	0.196917	6.552e-258	4.27936e-257	34.3239
SBK1	0.264676	1.12266e-257	7.32834e-257	34.3082
LCOR	0.198734	2.25684e-257	1.47235e-256	34.2878
PRKCZ	0.264364	1.304e-256	8.49037e-256	34.2366
STRBP	0.201649	1.7879e-256	1.16312e-255	34.2273
FADS1	0.312685	2.2137e-256	1.43931e-255	34.2212
EXOC6B	0.154339	3.69501e-256	2.4004e-255	34.2061
STMN1	0.269236	7.05271e-255	4.5765e-254	34.1197
GNB1	0.17827	4.56798e-254	2.95748e-253	34.0647
ZNF782	0.284482	1.12182e-252	7.23663e-252	33.9707
ZNF609	0.171729	6.00834e-252	3.87042e-251	33.921
UBR5-DT	1.01658	1.12404e-250	7.21452e-250	33.8364
ENSG00000291061	0.458816	1.24076e-250	7.96146e-250	33.832
ENSG00000309586	1.57126	1.79879e-250	1.15389e-249	33.8247
CAMKK1	0.428811	8.03284e-250	5.14428e-249	33.7766
FADS2	0.251808	1.05055e-249	6.72592e-249	33.7683
KDM7A	0.370589	1.73974e-248	1.11043e-247	33.6852
DTX4	0.32219	2.95258e-247	1.87933e-246	33.6008
ANKIB1	0.197033	6.30377e-247	4.00796e-246	33.5781
SEPTIN3	0.252722	6.03563e-246	3.83006e-245	33.5107
SERGEF	0.22966	6.73588e-246	4.27207e-245	33.5074
ENSG00000228957	1.678	1.28801e-245	8.16438e-245	33.4933
PTPRZ1	0.185258	2.11614e-244	1.33916e-243	33.4044
TSPAN13	0.484539	6.19224e-244	3.91539e-243	33.3725
SLC38A9	0.299362	9.12164e-244	5.76292e-243	33.3605
TTC39C	0.268609	1.1137e-243	7.03233e-243	33.3545
PHF20L1	0.249887	1.1852e-243	7.48178e-243	33.3526
ADCY9	0.263337	3.13031e-243	1.97226e-242	33.3234
ENSG00000297774	0.709157	1.12189e-242	7.0627e-242	33.2861
ENSG00000306370	1.33902	3.32479e-242	2.09079e-241	33.2562
RBM33	0.193877	3.14357e-242	1.97737e-241	33.254
HDGFL3	0.209243	2.43314e-241	1.52715e-240	33.1923
HDAC2	0.28006	4.71435e-241	2.95734e-240	33.1724
KDM1A	0.230094	3.93775e-240	2.46412e-239	33.1083
LINGO1	0.149803	1.88376e-239	1.17624e-238	33.0609
ENSG00000287488	1.38851	3.42732e-239	2.13773e-238	33.0464
RHOF	0.346148	7.24334e-239	4.513e-238	33.0202
ATXN7L1	0.190982	8.50335e-239	5.2952e-238	33.0152
SSBP2	0.165628	1.45698e-238	9.07042e-238	32.9989
EPHA5-AS1	0.412616	4.59381e-238	2.85601e-237	32.9643
ENSG00000289498	0.811962	5.71582e-238	3.55166e-237	32.9585
SMPDL3A	0.833796	6.98111e-237	4.33202e-236	32.8824
TAS2R14	0.166282	9.72828e-237	6.03022e-236	32.8712
NCS1	0.249917	9.534e-236	5.89074e-235	32.8016
SC5D	0.472604	1.55905e-235	9.62507e-235	32.787
PENK-AS1	0.887442	3.2382e-235	1.99863e-234	32.7658
SOS1	0.183048	4.96993e-235	3.06663e-234	32.7512
USP49	0.259626	1.54341e-234	9.51322e-234	32.7166
TMEM200C	0.880407	4.86184e-234	2.99351e-233	32.6828
ARPC5	0.634743	6.31234e-234	3.88453e-233	32.6741
ZNF117	0.24343	9.55537e-234	5.87553e-233	32.6607
ZNF706	0.328339	3.13196e-233	1.92171e-232	32.6244
TNFRSF21	0.342193	4.44356e-233	2.7243e-232	32.6137
TMEM200A	0.588505	9.45756e-233	5.79679e-232	32.5908
UCK2	0.267606	1.28803e-231	7.88629e-231	32.5101
GNAQ	0.170572	1.83463e-231	1.123e-230	32.4991
RAI14	0.206324	2.09989e-231	1.28502e-230	32.495
COG5	0.223475	2.66146e-231	1.62824e-230	32.4877
ENSG00000284707	0.199688	2.93828e-231	1.79712e-230	32.4846
ATP2B1	0.234823	3.52723e-231	2.15504e-230	32.479
DAAM1	0.180511	1.69382e-230	1.03323e-229	32.4306
ENSG00000308378	1.13639	2.66393e-230	1.62328e-229	32.419
JADE3	0.345274	4.85202e-230	2.95503e-229	32.3983
MIR4500HG	0.379377	1.84567e-229	1.12258e-228	32.3569
ACSL4	0.314029	2.55286e-229	1.55107e-228	32.3469
RPS6KA5	0.225946	5.58655e-229	3.38981e-228	32.3225
FABP7	0.572747	1.1101e-228	6.73053e-228	32.3016
DCHS1	0.262891	1.5093e-228	9.14606e-228	32.2918
NCAM1	0.108751	2.7545e-228	1.66742e-227	32.2731
ANKRD27	0.290864	1.38948e-227	8.40451e-227	32.2229
AGTPBP1	0.204627	1.89382e-227	1.14491e-226	32.2132
PRKACB	0.202058	2.84482e-227	1.71893e-226	32.2006
TRPC4AP	0.199654	3.72827e-227	2.25214e-226	32.1922
CACNB3	0.422272	2.03613e-226	1.22739e-225	32.1396
IGFBP2	0.371046	2.3131e-226	1.39398e-225	32.1355
PROM1	0.384138	5.0927e-226	3.06508e-225	32.1109
ABHD16A	0.463131	5.55441e-226	3.34209e-225	32.1085
ENSG00000299982	0.980633	2.43572e-224	1.46022e-223	31.9921
QKILA	0.662104	8.35978e-224	5.00651e-223	31.9523
FEZ2	0.30296	1.43184e-223	8.56829e-223	31.9346
VASH2	0.287907	5.39181e-223	3.22233e-222	31.893
SLC16A7	0.282588	7.21746e-223	4.31117e-222	31.8839
ZSWIM4	0.290091	1.53455e-222	9.16385e-222	31.8602
CREB1	0.257842	2.54113e-222	1.5167e-221	31.8443
UBE2H	0.204844	3.21663e-222	1.91888e-221	31.8369
GALNT10	0.310706	8.77893e-222	5.23164e-221	31.8054
CCDC50	0.275009	1.44487e-221	8.60155e-221	31.7896
RBBP4	0.226073	4.82378e-221	2.87018e-220	31.7516
MAPK4	0.293215	1.08202e-220	6.4298e-220	31.7262
CNTN2	0.404135	1.33618e-220	7.93395e-220	31.7198
PUM3	0.233761	9.53791e-220	5.65755e-219	31.6574
ENSG00000286552	1.72665	2.27297e-219	1.3472e-218	31.6343
BLACAT1	0.566774	6.68645e-219	3.95698e-218	31.5963
TACC2	0.222843	8.88826e-219	5.25864e-218	31.5868
LRRC7-AS1	0.885835	3.24696e-218	1.9161e-217	31.5469
TMEM151B	0.365801	1.11912e-217	6.59568e-217	31.5066
MASP1	0.400691	7.65306e-217	4.50236e-216	31.4455
PREP	0.286592	1.50976e-216	8.87524e-216	31.4237
EXD3	0.229292	8.17567e-216	4.80245e-215	31.3698
ENSG00000287559	1.18111	1.24818e-215	7.33002e-215	31.3582
SCFD2	0.210227	1.78359e-214	1.04503e-213	31.2713
APLP1	0.343178	1.80876e-214	1.0595e-213	31.271
ZNRF1	0.196424	2.00286e-214	1.1729e-213	31.2676
ATCAY	0.22345	2.26098e-214	1.32372e-213	31.2637
CHST15	0.292946	4.3065e-214	2.52001e-213	31.2431
GDAP1L1	0.294021	1.92234e-213	1.12403e-212	31.1952
NANOS3	0.335873	2.21128e-213	1.29265e-212	31.1908
AP1AR	0.361017	2.22037e-213	1.29763e-212	31.1906
ENSG00000272371	0.355243	1.99681e-212	1.16402e-211	31.1201
GABRB3	0.166452	3.1417e-212	1.83003e-211	31.1053
QSER1	0.243736	1.03682e-211	6.02878e-211	31.067
ENSG00000285837	0.531877	2.16012e-211	1.25477e-210	31.0436
LINC02476	1.02435	1.67336e-210	9.70551e-210	30.9795
POU6F1	0.305367	2.33709e-210	1.35414e-209	30.9665
SEMA4D	0.267295	3.73962e-210	2.16352e-209	30.9513
ATP6V0E2	0.401179	5.27642e-210	3.05186e-209	30.9403
ENSG00000287020	1.30214	7.41958e-210	4.28822e-209	30.9318
ENSG00000300022	0.447503	1.81933e-209	1.05097e-208	30.9003
ENSG00000298391	0.939992	7.16651e-209	4.13053e-208	30.8569
BTBD9	0.176647	4.60921e-208	2.65393e-207	30.7951
YWHAG	0.248557	4.76298e-208	2.74178e-207	30.7941
TTC7B	0.176911	9.14358e-208	5.26082e-207	30.7729
ZBTB34	0.618703	1.3707e-207	7.87854e-207	30.7602
ENSG00000250195	0.35468	3.50039e-207	2.00995e-206	30.7294
SMS	0.316025	1.73004e-206	9.90929e-206	30.6772
ENSG00000272505	0.534462	1.92961e-206	1.10441e-205	30.6739
TRIM36	0.240918	2.26668e-206	1.29701e-205	30.6683
ENSG00000290945	0.254417	3.28966e-206	1.88096e-205	30.6562
MYO9B	0.191113	4.66236e-206	2.66386e-205	30.6448
LINC01248	0.680167	7.99593e-206	4.56624e-205	30.6279
ENSG00000299960	0.990259	2.52559e-205	1.44086e-204	30.5908
RC3H1	0.211412	2.72735e-205	1.55558e-204	30.5871
ENSG00000288921	0.850561	1.11966e-204	6.36873e-204	30.5422
SCD	0.392625	3.36041e-204	1.91002e-203	30.5049
ENSG00000294028	0.896948	4.99145e-204	2.83638e-203	30.4928
TUBB3	0.453286	5.44234e-204	3.09184e-203	30.4893
MMP24	0.295769	7.90937e-204	4.49005e-203	30.4768
PLXNA3	0.292131	2.52377e-203	1.43059e-202	30.4386
PCSK6	0.368255	5.54945e-203	3.14336e-202	30.4127
ADAMTS9-AS1	1.69284	1.74289e-202	9.85522e-202	30.3782
NT5C3A	0.325437	1.82708e-202	1.03262e-201	30.3735
IQCJ	0.350313	8.99763e-202	5.07776e-201	30.3211
GPM6A-DT	0.836587	9.94517e-202	5.61112e-201	30.3186
RRM2B	0.703816	3.90227e-201	2.19737e-200	30.2731
EFNB2	0.22727	8.37184e-201	4.70957e-200	30.2471
ZSWIM5	0.187959	2.16815e-200	1.2185e-199	30.2156
MTMR12	0.27722	2.58033e-200	1.44944e-199	30.21
ARRB1	0.206867	8.20405e-200	4.60392e-199	30.1716
ENSG00000288597	0.201858	9.20124e-200	5.16226e-199	30.1678
ADRA2A	0.816094	1.70617e-199	9.56527e-199	30.1483
YWHAQ	0.233962	4.18782e-199	2.3461e-198	30.1175
RGS17	0.22811	5.12059e-199	2.86726e-198	30.1108
RALY	0.223597	1.27434e-198	7.12869e-198	30.0805
FBLN1	0.275362	2.17437e-198	1.21546e-197	30.0627
MBTPS1	0.2572	2.22342e-198	1.24258e-197	30.062
PTCHD1	0.488372	2.98109e-198	1.6656e-197	30.0525
SQLE	0.35549	3.44123e-198	1.92223e-197	30.0475
FAM20C	0.247465	4.25726e-198	2.37689e-197	30.0403
ZNF506	0.24743	1.42225e-197	7.93677e-197	30.0002
ENSG00000287987	1.5771	3.10782e-197	1.73262e-196	29.9774
NEBL	0.232093	4.96132e-197	2.76394e-196	29.9584
ENSG00000286677	0.335315	8.12482e-197	4.52194e-196	29.942
DNAJC6	0.242788	4.19807e-196	2.33139e-195	29.887
GNG4	0.23399	5.96464e-196	3.31086e-195	29.8753
ENSG00000242540	0.698024	7.01425e-196	3.8916e-195	29.8705
ENSG00000295854	1.06679	7.3671e-196	4.08638e-195	29.8698
GAREM1	0.191621	8.24903e-196	4.57446e-195	29.8644
CASTOR2	0.218346	2.92941e-194	1.61941e-193	29.7446
GTF2IRD2B	0.299814	1.22485e-193	6.76298e-193	29.6965
MTMR3	0.194704	1.37874e-193	7.60904e-193	29.6924
ATL1	0.250488	4.3552e-193	2.39953e-192	29.6537
NCAN	0.182514	8.42006e-193	4.63799e-192	29.6313
SOBP	0.15871	3.63751e-192	1.99837e-191	29.5819
ENSG00000286458	0.343052	4.08129e-192	2.24164e-191	29.5782
SPIN1	0.197545	5.4142e-192	2.97303e-191	29.5685
ENSG00000285789	1.5309	1.98702e-191	1.08981e-190	29.5276
ZNF253	0.33489	2.54245e-191	1.39377e-190	29.5162
ANK1	0.320906	9.89775e-191	5.41691e-190	29.4701
POU3F1	1.34937	1.07269e-190	5.8693e-190	29.4696
PLCH2	0.496291	1.28806e-190	7.04603e-190	29.4614
RASA1	0.188311	3.4168e-190	1.86686e-189	29.4279
PRMT2	0.181672	3.59256e-190	1.96242e-189	29.4262
FRG1HP	0.237367	2.14698e-189	1.17167e-188	29.3654
HDAC8	0.179984	2.57863e-189	1.40657e-188	29.3591
PHKA2	0.322425	2.8391e-189	1.54828e-188	29.3559
MINK1	0.220621	3.6767e-189	2.00458e-188	29.347
SUN2	0.279922	8.00525e-189	4.36042e-188	29.3205
EIF1B	0.774288	8.70633e-189	4.74117e-188	29.3185
TNKS1BP1	0.363824	3.77992e-188	2.05598e-187	29.2676
IFI44	0.439509	4.62999e-188	2.51775e-187	29.2607
ENSG00000298549	0.689022	4.92548e-188	2.67717e-187	29.2591
DACT1	0.404344	7.78051e-188	4.22798e-187	29.2429
ENSG00000241489	0.332675	8.96174e-188	4.86757e-187	29.2381
LINC02605	1.75946	1.20273e-187	6.52954e-187	29.2311
GNAZ	0.315053	2.62217e-187	1.42222e-186	29.2013
OSBPL8	0.175901	2.76569e-187	1.49971e-186	29.1993
XKR7	0.303668	1.5892e-186	8.59722e-186	29.1395
ACTL6B	0.272825	3.31744e-186	1.79424e-185	29.1142
ENSG00000304216	1.51521	2.57621e-185	1.38585e-184	29.0462
RNF217-AS1	0.449418	5.01218e-185	2.69374e-184	29.0208
PAK2	0.210094	6.77929e-185	3.6409e-184	29.0103
ENSG00000295602	0.482863	7.01861e-185	3.76855e-184	29.0093
ENSG00000225144	1.48633	1.22159e-184	6.55303e-184	28.9925
ENSG00000294384	0.519441	2.89431e-184	1.55153e-183	28.9605
ENSG00000234504	0.709439	3.33554e-184	1.78722e-183	28.956
AMN1	0.267573	4.82877e-184	2.58501e-183	28.9425
TDRP	0.256105	7.48978e-184	4.00471e-183	28.9273
SRGAP2B	0.242554	7.65113e-184	4.09003e-183	28.9266
ENSG00000289885	0.828824	3.38739e-183	1.80658e-182	28.8758
MIR2052HG	0.393534	3.4992e-183	1.86578e-182	28.8741
BCR	0.199542	5.97587e-182	3.17384e-181	28.7754
ENSG00000253678	0.389969	6.56107e-182	3.48384e-181	28.7723
ENSG00000240291	0.342061	6.95766e-182	3.69357e-181	28.7703
ABLIM1	0.200402	8.12909e-182	4.31444e-181	28.7648
TMEM196	0.350546	2.51089e-181	1.33171e-180	28.7257
ABRACL	0.463676	1.18173e-180	6.25605e-180	28.6718
SLC13A3	0.223844	1.83658e-180	9.71384e-180	28.6561
ENSG00000223751	0.712817	2.43572e-180	1.28798e-179	28.6469
MLXIP	0.259316	6.43113e-180	3.3968e-179	28.6124
ZNF821	0.242335	7.89849e-179	4.1556e-178	28.5246
NDRG1	0.243137	4.92005e-178	2.58384e-177	28.4603
CMIP	0.133189	6.68897e-178	3.51121e-177	28.4495
UCHL1	0.282394	1.08637e-177	5.69614e-177	28.4325
ENSG00000255723	0.754254	1.32408e-177	6.93936e-177	28.4262
ENSG00000224905	0.168471	1.86291e-177	9.75882e-177	28.4135
SILC1	0.296997	2.89929e-177	1.51706e-176	28.398
ENSG00000285756	0.31873	1.02976e-176	5.37481e-176	28.3533
GLRX	0.563773	4.5919e-176	2.39401e-175	28.3008
SH3BP5	0.249338	2.97984e-175	1.54969e-174	28.2343
ENSG00000303941	1.80726	3.44964e-175	1.79361e-174	28.2319
FLRT1	0.262972	1.15393e-174	5.99029e-174	28.1863
WDFY2	0.218179	1.68231e-174	8.72535e-174	28.1729
ENSG00000310335	1.02807	1.80793e-174	9.37474e-174	28.1714
NDEL1	0.314989	1.05258e-173	5.44449e-173	28.1078
KANSL1	0.140682	1.53726e-173	7.94792e-173	28.0942
VTA1	0.272986	2.39032e-173	1.23501e-172	28.0786
SAMD3	0.383787	2.50931e-173	1.2962e-172	28.0769
ENSG00000294080	0.784947	9.59733e-173	4.94533e-172	28.0298
ENSG00000272209	1.43603	2.36702e-172	1.21777e-171	27.9991
PIN4	0.314412	2.33738e-172	1.20306e-171	27.9973
PCDHA10	0.396971	2.46878e-172	1.26984e-171	27.9954
ENSG00000293626	0.322788	3.2106e-172	1.65067e-171	27.9859
BMS1P1-1	0.368821	4.9126e-172	2.52402e-171	27.9708
LINC01831	1.05451	3.12239e-171	1.60102e-170	27.9056
GRB2	0.234294	3.13746e-171	1.60838e-170	27.9043
LINC02055	0.470311	4.03669e-171	2.06891e-170	27.8956
SERINC2	0.403395	1.71936e-170	8.79844e-170	27.8434
AGFG1	0.240798	2.78402e-170	1.42339e-169	27.8259
CDK2AP1	0.445373	2.92205e-170	1.49363e-169	27.8243
ZNF704	0.164574	1.70254e-169	8.68145e-169	27.7607
DOCK7	0.168104	2.40887e-169	1.22722e-168	27.7482
SLC17A7	0.299404	4.1865e-169	2.13191e-168	27.7283
BCLAF3	0.201084	1.44316e-168	7.33606e-168	27.6836
TMEM38B	0.382326	1.59288e-168	8.09354e-168	27.6802
ENSG00000251680	0.213661	2.6236e-168	1.3319e-167	27.662
UVRAG	0.187121	7.53991e-168	3.82602e-167	27.6238
MLLT11	0.439926	1.82541e-167	9.25463e-167	27.592
MPZL1	0.222387	1.9693e-164	9.91637e-164	27.3375
MARCHF6	0.17342	7.63336e-164	3.83536e-163	27.2879
BAZ1A	0.247346	8.42589e-164	4.23264e-163	27.2843
ITGA9-AS1	0.238107	1.35961e-163	6.82386e-163	27.2667
KBTBD2	0.339414	3.20649e-163	1.60793e-162	27.2354
LHFPL4	0.19269	4.86424e-163	2.43604e-162	27.2199
ZNF280D	0.202983	9.9903e-163	4.99993e-162	27.1935
SMARCA4	0.144072	2.7791e-162	1.38846e-161	27.1558
LMBR1L	0.248186	4.17151e-162	2.08277e-161	27.1409
CAMSAP3	0.297033	5.64927e-162	2.81814e-161	27.1297
DCC	0.159629	5.73134e-162	2.85846e-161	27.1291
NARF	0.206295	8.32285e-162	4.14826e-161	27.1154
L3MBTL4	0.215729	8.96949e-162	4.46958e-161	27.1126
RENO1	0.460683	1.51633e-160	7.51532e-160	27.0084
LINC01821	0.808686	2.9611e-160	1.46633e-159	26.9841
MATK	0.605346	5.94731e-160	2.9413e-159	26.9579
NUTM2A-AS1	0.193211	9.22627e-160	4.55999e-159	26.9412
ENSG00000227307	1.15832	5.24579e-159	2.58768e-158	26.8782
NUP93	0.206493	5.18592e-159	2.55869e-158	26.8771
CTDSPL	0.19574	6.14524e-159	3.03071e-158	26.8707
TAFA2	0.187245	5.56808e-158	2.73961e-157	26.7886
UBE2Q2P2	0.232805	8.66933e-158	4.26092e-157	26.7721
TSNARE1	0.19694	1.02708e-157	5.04696e-157	26.7657
EBF4	0.238819	2.46814e-157	1.21126e-156	26.733
ENSG00000227400	0.696148	6.09104e-157	2.98669e-156	26.6996
GRM7-AS1	1.13303	7.21656e-157	3.53782e-156	26.6943
MAPK11	0.360752	9.14357e-157	4.47965e-156	26.684
ENSG00000259539	0.325121	9.4165e-157	4.61238e-156	26.6829
HDAC9	0.16576	1.81517e-156	8.88914e-156	26.6582
MORF4L1	0.214842	3.14532e-156	1.539e-155	26.6376
EHBP1	0.138889	3.80315e-156	1.86008e-155	26.6305
STX2	0.230544	7.38872e-156	3.60991e-155	26.6055
NKTR	0.128985	8.16033e-156	3.98605e-155	26.6018
CD24	0.418843	1.8161e-155	8.85974e-155	26.5718
ENSG00000300505	1.00813	4.75438e-154	2.31351e-153	26.4496
AZIN2	0.416912	9.02977e-154	4.39023e-153	26.4244
LINC01163	1.15812	1.42911e-153	6.94387e-153	26.4084
SFSWAP	0.170609	1.82726e-153	8.8728e-153	26.3976
TUBB2B	0.324767	7.48783e-153	3.6275e-152	26.3442
PRRC2B	0.133384	1.04566e-152	5.06251e-152	26.3314
TSTD2	0.267676	1.63824e-152	7.92647e-152	26.3144
CDC42EP3	0.406112	2.04643e-152	9.89317e-152	26.3061
ARHGEF9	0.179388	2.64447e-152	1.27816e-151	26.2962
ADGRA3	0.213354	2.74329e-152	1.32565e-151	26.2948
PCGF3	0.177883	4.71927e-152	2.27858e-151	26.2742
CERS4	0.172764	1.41102e-151	6.80705e-151	26.2325
ANKRD62P1	1.6259	2.41634e-151	1.16447e-150	26.2142
NALF2	0.626391	4.43879e-151	2.13822e-150	26.1891
ZNF678	0.223619	9.12777e-151	4.39421e-150	26.1612
SNAPC3	0.222422	1.80694e-150	8.68789e-150	26.1351
XIST	0.195991	3.93365e-150	1.88975e-149	26.1053
ENSG00000267199	0.676136	6.66326e-150	3.19706e-149	26.0855
RAP2B	0.738617	8.38845e-150	4.02229e-149	26.0767
ENSG00000288993	0.399926	1.07731e-149	5.16036e-149	26.0668
STX3	0.345221	1.432e-149	6.85791e-149	26.0559
LONRF1	0.287493	2.66829e-149	1.27706e-148	26.0319
SARM1	0.201733	9.29643e-149	4.44008e-148	25.9839
LDB1	0.246195	1.04266e-148	4.97885e-148	25.9795
AKAP9	0.119562	3.03416e-148	1.44705e-147	25.9383
ENSG00000270149	0.350028	4.21006e-148	2.00702e-147	25.9258
PHKB	0.169044	5.66539e-148	2.69913e-147	25.9143
APLP2	0.199497	1.4217e-147	6.76773e-147	25.8788
HELB	0.448596	1.63959e-147	7.80172e-147	25.8734
ENSG00000308482	1.48826	3.684e-147	1.7508e-146	25.8439
VWCE	0.411899	3.83196e-147	1.82036e-146	25.8406
PLAAT1	0.419816	1.00578e-146	4.77103e-146	25.8032
FAM242B	0.735668	1.32064e-146	6.26202e-146	25.793
DCUN1D4	0.197879	1.98606e-146	9.4075e-146	25.7767
USP12	0.255818	2.1723e-146	1.02854e-145	25.7732
IQCJ-SCHIP1	0.704079	2.51124e-146	1.18854e-145	25.768
KCNV1	1.00289	2.97532e-146	1.40731e-145	25.7617
DTX1	0.22359	1.74601e-145	8.22975e-145	25.6923
TMED3	0.320351	2.8839e-145	1.35737e-144	25.6728
ENSG00000291089	0.370399	2.92545e-145	1.37664e-144	25.6723
ENSG00000259846	0.520884	6.56367e-145	3.08617e-144	25.6409
ARB2A	0.144972	8.13121e-145	3.82243e-144	25.6323
TEC	0.749491	2.87716e-144	1.34813e-143	25.5833
ENSG00000271533	0.336525	3.41948e-144	1.60159e-143	25.5763
SERTAD2	0.325965	1.04669e-143	4.88847e-143	25.5325
HS6ST1	0.227826	1.39682e-143	6.52237e-143	25.5212
ENSG00000285780	1.23147	3.88008e-143	1.80884e-142	25.4823
RBM20	0.62255	4.7927e-143	2.23339e-142	25.4731
TRPC1	0.190546	1.1769e-142	5.47545e-142	25.4376
CTNNBL1	0.210837	1.57468e-142	7.32168e-142	25.4261
TSPAN5	0.13458	1.63446e-142	7.59652e-142	25.4246
CYP7B1	0.28291	1.76827e-142	8.21349e-142	25.4216
ADAM7-AS1	0.37412	2.23673e-142	1.03831e-141	25.4124
ENSG00000293926	0.802681	3.00438e-142	1.39382e-141	25.4012
INTS12	0.346287	4.56883e-142	2.11833e-141	25.3843
KPNA3	0.201179	2.42657e-141	1.12259e-140	25.3184
TNKS2	0.214573	2.86828e-141	1.32587e-140	25.3118
ATAT1	0.207279	2.55923e-140	1.17992e-139	25.2252
LINC00662	0.180423	3.19597e-140	1.47231e-139	25.2164
SEH1L	0.394671	6.34293e-140	2.91853e-139	25.1893
PLEKHG2	0.249135	3.46228e-139	1.58736e-138	25.1218
FEZ1	0.231135	7.09393e-138	3.23882e-137	25.0013
TNRC18	0.12846	9.22411e-138	4.20887e-137	24.9908
SYPL1	0.490347	1.09226e-137	4.98289e-137	24.9842
SOS2	0.178676	1.2591e-137	5.74285e-137	24.9783
RICTOR	0.17583	1.58707e-137	7.23588e-137	24.9691
ZNF71	0.317559	1.78148e-137	8.11745e-137	24.9645
ZNF660	0.320569	2.04782e-137	9.32732e-137	24.9589
MBD5	0.115874	2.46022e-137	1.12013e-136	24.9515
UBA6	0.184439	3.34597e-137	1.5222e-136	24.9392
ABL2	0.172358	3.38087e-137	1.53777e-136	24.9388
PCMTD1	0.173958	1.58496e-136	7.19346e-136	24.8768
LINC02217	0.826326	6.54265e-136	2.96359e-135	24.8202
LRRC55	0.501526	8.3424e-136	3.77583e-135	24.8102
PPP1R21	0.21975	1.46587e-135	6.62291e-135	24.7873
MTCL2	0.142402	6.14178e-135	2.76892e-134	24.7294
ENSG00000259035	0.847407	7.54483e-135	3.40079e-134	24.7218
MAPK8IP2	0.262751	3.42527e-134	1.5409e-133	24.6599
ENSG00000253796	0.465178	3.94727e-134	1.77504e-133	24.6542
ENSG00000258526	0.154942	4.31759e-134	1.94081e-133	24.6504
MEMO1	0.156701	1.0554e-133	4.73953e-133	24.6142
ZNF197	0.215304	1.06603e-133	4.78632e-133	24.6138
UBE2D1	0.334545	2.32343e-133	1.04136e-132	24.5822
STAU2	0.143036	2.40475e-133	1.07759e-132	24.5807
ENSG00000223436	1.09824	3.02647e-133	1.3554e-132	24.5722
SLC23A2	0.165226	5.0376e-133	2.25564e-132	24.5506
EDA	0.244137	8.51892e-133	3.80999e-132	24.5293
LINC02210-CRHR1	0.194809	1.70573e-132	7.62275e-132	24.5009
ENSG00000309057	0.736627	1.93976e-132	8.66357e-132	24.4961
NXN	0.161156	2.55976e-132	1.14282e-131	24.4844
PBRM1	0.141031	5.83371e-132	2.60197e-131	24.4507
SCRT1	0.470033	1.14002e-131	5.0769e-131	24.4235
DLGAP4	0.127781	2.64684e-131	1.1769e-130	24.3888
TPO	0.79478	2.94638e-131	1.30984e-130	24.385
KMT2E	0.127731	3.52784e-131	1.56803e-130	24.377
ENSG00000285934	1.04588	4.00176e-131	1.77833e-130	24.3728
MIR9-3HG	0.157971	1.68011e-130	7.45036e-130	24.313
ULK1	0.228645	1.82723e-130	8.1012e-130	24.3095
SHOC2	0.200444	2.06148e-130	9.13799e-130	24.3046
ZNF135	0.210932	2.44935e-129	1.08198e-128	24.2026
FLRT2-AS1	0.539001	7.75759e-129	3.42421e-128	24.1551
SLC35B4	0.372593	3.49499e-128	1.53885e-127	24.0927
ENSG00000230051	0.769197	3.92744e-128	1.72893e-127	24.0881
ENSG00000296526	0.957721	4.10656e-128	1.80744e-127	24.0864
LRRC2	0.827325	5.70841e-128	2.51199e-127	24.0726
MAP4K5	0.152206	9.36022e-128	4.1166e-127	24.0517
PAFAH1B1	0.134326	1.52709e-127	6.7071e-127	24.0313
CADM3	0.179797	4.57329e-127	2.00633e-126	23.9857
ENSG00000303853	0.198128	4.7603e-127	2.08798e-126	23.984
PLEKHG4B	0.165723	1.04178e-126	4.56689e-126	23.9513
NCKAP1	0.166773	1.97408e-126	8.65051e-126	23.9247
SERP2	0.361012	2.35178e-126	1.03037e-125	23.9174
PODXL2	0.178752	4.87594e-126	2.13544e-125	23.8869
CDRT4	0.21631	8.26682e-126	3.61911e-125	23.8648
MEF2C-AS1	0.197728	9.63828e-126	4.21872e-125	23.8583
MYO9A	0.125663	1.36847e-125	5.98759e-125	23.8436
DYRK2	0.369012	2.27778e-125	9.96046e-125	23.8224
ENSG00000265179	1.11395	2.39329e-125	1.04636e-124	23.8211
KLF8	0.33128	4.71764e-125	2.0614e-124	23.7918
ZNF286B	0.668417	6.61018e-125	2.88726e-124	23.7779
KCNH7	0.130623	8.61147e-125	3.75998e-124	23.7664
NEK6	0.227313	1.10653e-124	4.82955e-124	23.7559
CPMER	1.03611	1.58443e-124	6.91275e-124	23.7416
ENSG00000297880	0.86691	5.19813e-124	2.26447e-123	23.6914
ENSG00000280339	1.22432	7.29641e-124	3.17674e-123	23.6773
CDCP1	0.985426	7.59246e-124	3.30501e-123	23.6755
ENSG00000205018	0.875523	9.10724e-124	3.96215e-123	23.6677
RAB29	1.19317	1.15917e-123	5.0411e-123	23.6578
HSD17B11	0.511968	1.29414e-123	5.62488e-123	23.6524
EXOC5	0.201042	1.37614e-123	5.97906e-123	23.6496
LAPTM4A	0.434871	3.05896e-123	1.32755e-122	23.616
ZBTB10	0.294795	1.61497e-122	6.99162e-122	23.5454
ENSG00000307577	1.25023	3.60054e-122	1.55672e-121	23.5124
ENSG00000295972	1.54719	6.14655e-122	2.654e-121	23.49
TUBB	0.275015	6.75422e-122	2.91584e-121	23.4846
ENSG00000299102	1.51409	7.06502e-122	3.04944e-121	23.4843
GTF2IRD2	0.286553	1.94525e-121	8.38361e-121	23.4395
RTN3	0.124629	3.20413e-121	1.37962e-120	23.4182
PRKAR2A	0.193578	3.63167e-121	1.56341e-120	23.4129
LINC02554	1.4398	4.36957e-121	1.88037e-120	23.4064
SIAH1	0.269525	5.41906e-121	2.33156e-120	23.3958
ZNF785	0.229835	6.80425e-121	2.92645e-120	23.3861
EDARADD	0.579828	1.13872e-120	4.89023e-120	23.3643
SCARB2	0.207115	1.34663e-120	5.78093e-120	23.3569
LINC00710	0.731544	1.62061e-120	6.9532e-120	23.3492
TRIQK	0.260307	2.19548e-120	9.41264e-120	23.336
DAB2	0.51943	3.52251e-120	1.5088e-119	23.3157
PCDHGA2	0.142244	3.67599e-120	1.57424e-119	23.3139
EIF4EBP1	0.40643	3.85634e-120	1.65086e-119	23.3119
WDFY3	0.131041	6.14692e-120	2.62997e-119	23.2918
B4GALNT4	0.2059	8.96624e-120	3.83479e-119	23.2757
FAT3	0.119239	9.16279e-120	3.91812e-119	23.2747
SLC4A10	0.131968	9.67525e-120	4.13572e-119	23.2724
SRCIN1	0.14227	1.04926e-119	4.48345e-119	23.2689
ESRRA	0.343286	1.5087e-119	6.44539e-119	23.2534
ENSG00000299574	1.45467	1.60292e-119	6.84664e-119	23.252
GMIP	0.307622	1.68051e-119	7.17541e-119	23.2487
SGK1	0.186632	3.83472e-119	1.63552e-118	23.2132
PLEKHG5	0.259653	5.45678e-119	2.32647e-118	23.198
ENSG00000287278	1.07689	5.59528e-119	2.38463e-118	23.1977
GRAP2	1.25412	5.6927e-119	2.4257e-118	23.197
CXADR	0.235661	7.67116e-119	3.26813e-118	23.1833
ADCY3	0.186233	1.32734e-118	5.65169e-118	23.1597
R3HDM2	0.131093	2.46844e-118	1.04968e-117	23.1329
AIG1	0.166075	8.31686e-118	3.53079e-117	23.0804
HS1BP3	0.325861	9.04996e-118	3.84131e-117	23.0768
PHC2-AS1	0.676222	1.4811e-117	6.2808e-117	23.0557
GUSBP15	0.419569	2.48041e-117	1.0503e-116	23.0331
SWT1	0.229381	2.56933e-117	1.08775e-116	23.0315
SRRM3	0.153341	3.74535e-117	1.58447e-116	23.0151
ENSG00000249926	1.54011	7.00471e-117	2.95845e-116	22.9893
CNIH2	0.407677	1.1725e-116	4.94932e-116	22.9656
ARID3B	0.232781	1.51896e-116	6.41063e-116	22.9543
ZFTA	0.410805	1.68588e-116	7.1138e-116	22.9498
ZNF747-DT	0.414994	4.74777e-116	1.99935e-115	22.9047
REC8	0.330059	5.87319e-116	2.47283e-115	22.8954
SPAST	0.169406	1.6705e-115	7.02953e-115	22.8497
VPS8	0.16114	1.52488e-114	6.39687e-114	22.7528
FAXC	0.206413	2.74239e-114	1.14939e-113	22.727
STX1A	0.313659	3.20463e-114	1.34238e-113	22.7202
KLHL7	0.163522	6.48885e-114	2.71563e-113	22.6891
RBM6	0.11006	9.90163e-114	4.14315e-113	22.6705
PWWP3A	0.192929	1.10037e-113	4.60177e-113	22.6658
RTL4	0.643672	1.34209e-113	5.61163e-113	22.6574
ENSG00000253634	0.73217	3.25899e-113	1.3602e-112	22.6182
ZNF66	0.24496	3.57206e-113	1.49032e-112	22.6139
LRRC4C	0.157762	3.72638e-113	1.55443e-112	22.612
LOXL2	0.250325	3.81628e-113	1.59164e-112	22.611
LINC01315	0.591812	4.50689e-113	1.87831e-112	22.6038
GUSBP3-1	0.45137	5.85805e-113	2.44054e-112	22.5922
ZMIZ2	0.208019	7.16663e-113	2.98408e-112	22.5831
ENSG00000224015	0.733937	7.251e-113	3.01867e-112	22.5829
ENSG00000279983	0.345203	8.80381e-113	3.66379e-112	22.5741
ENSG00000286693	1.06171	3.51369e-112	1.45935e-111	22.5134
YPEL4	0.769939	3.57929e-112	1.48633e-111	22.5122
PCSK2	0.169535	5.23483e-112	2.17145e-111	22.495
MEX3B	0.332013	1.03391e-111	4.28488e-111	22.4648
STAU1	0.187255	1.93789e-111	8.01828e-111	22.4368
TNFSF4	0.225017	2.10978e-111	8.72479e-111	22.433
SCG3	0.2265	3.80249e-111	1.5722e-110	22.4068
WNT2B	0.311725	4.65848e-111	1.92509e-110	22.3977
KHDRBS1	0.15499	6.65816e-111	2.74947e-110	22.3817
ATRX	0.106538	7.96704e-111	3.28937e-110	22.3737
AKNAD1	0.610062	9.41629e-111	3.88564e-110	22.3664
ZFHX2-AS1	0.161774	1.29449e-110	5.33787e-110	22.3521
ITFG2-AS1	0.249783	2.45505e-110	1.0109e-109	22.3235
PLEKHA1	0.227754	2.79013e-110	1.14826e-109	22.3177
PLPPR3	0.297064	7.9993e-110	3.28558e-109	22.2706
METTL6	0.178147	1.10504e-109	4.53635e-109	22.256
RNF19A	0.201779	1.41352e-109	5.79857e-109	22.245
ZNF277	0.219555	1.41937e-109	5.82153e-109	22.2448
LINC02356	0.953549	1.71023e-109	7.01324e-109	22.237
ENSG00000294671	1.38136	2.43438e-109	9.97565e-109	22.2216
JAZF1	0.128365	2.55829e-109	1.04816e-108	22.2183
MBTD1	0.16052	3.41646e-109	1.39876e-108	22.2053
MYBPHL	0.919009	4.18796e-109	1.71401e-108	22.1967
KIF26B-AS1	0.68715	8.1055e-109	3.31323e-108	22.1667
TMEM64	0.379814	8.44694e-109	3.45157e-108	22.1646
HYDIN2	0.147678	9.5002e-109	3.88057e-108	22.1592
TASOR2	0.173503	1.30266e-108	5.31818e-108	22.145
UTP23	0.244574	1.50277e-108	6.13403e-108	22.1386
PRKY	0.24094	1.87386e-108	7.64469e-108	22.1286
MEX3C	0.346088	4.15664e-108	1.69426e-107	22.0927
NUDCD1	0.278681	1.39125e-107	5.66076e-107	22.038
RPS6KL1	0.263685	3.29194e-107	1.33778e-106	21.9989
ADGRL2	0.166275	5.14292e-107	2.08813e-106	21.9786
CLIC4	0.19572	6.87361e-107	2.78886e-106	21.9654
CACNA1E	0.110664	9.59831e-107	3.89093e-106	21.9502
CCND2	0.15864	9.69835e-107	3.93079e-106	21.9497
SYNGAP1	0.155246	1.54874e-106	6.27379e-106	21.9284
ENSG00000287720	0.277828	1.95128e-106	7.90026e-106	21.9179
HECTD3	0.362485	2.85335e-106	1.15485e-105	21.9007
CRTC3	0.169821	3.19596e-106	1.29306e-105	21.8954
TXNL4A	0.194434	3.49906e-106	1.41544e-105	21.8913
STK32C	0.244942	6.21022e-106	2.50951e-105	21.8651
CEP170B	0.266571	2.22867e-105	8.99329e-105	21.8067
UBE2G1	0.176686	2.77142e-105	1.11815e-104	21.7967
CHL1	0.118724	3.46937e-105	1.39851e-104	21.7864
DDHD1	0.189699	8.72718e-105	3.51241e-104	21.744
TSC22D1	0.132663	1.12624e-104	4.52959e-104	21.7323
ENSG00000255402	0.74043	1.23209e-104	4.95443e-104	21.7284
MYO1H	0.714428	1.54993e-104	6.22707e-104	21.718
ENSG00000255886	0.559873	1.88527e-104	7.57168e-104	21.7088
ENSG00000257045	1.39191	1.15546e-103	4.63008e-103	21.626
SYT14	0.131517	1.19558e-103	4.79003e-103	21.6235
LINC02883	0.250612	1.56064e-103	6.24828e-103	21.6112
LINC01807	0.551992	1.69248e-103	6.77494e-103	21.6076
LEPR	0.216051	2.50287e-103	1.00172e-102	21.5893
STC1	0.916677	3.12717e-103	1.2507e-102	21.5794
COLQ	0.211481	4.2831e-103	1.71212e-102	21.5645
ARHGAP28	0.232817	1.01442e-102	4.04868e-102	21.5245
GAS5	0.283041	1.51271e-102	6.03013e-102	21.506
ENSG00000309976	0.525291	2.44371e-102	9.73464e-102	21.4838
ENSG00000302763	0.544401	2.62991e-102	1.04746e-101	21.4804
RSF1	0.134038	2.64012e-102	1.05134e-101	21.4801
UXS1	0.175968	2.69181e-102	1.07174e-101	21.4792
ENSG00000254787	0.380949	3.212e-102	1.27863e-101	21.471
ENSG00000286416	0.374536	3.54884e-102	1.41247e-101	21.4664
WDR11	0.206406	5.60853e-102	2.22993e-101	21.445
PRRC1	0.293648	6.48565e-102	2.57734e-101	21.4383
ENSG00000250917	0.359062	8.18485e-102	3.25146e-101	21.4274
EPHX4	0.868555	2.05493e-101	8.15483e-101	21.3848
LPGAT1	0.169118	2.89855e-101	1.14987e-100	21.3684
RCOR2	0.507836	3.1187e-101	1.23656e-100	21.3651
ELMO1	0.140796	5.56962e-101	2.20645e-100	21.3378
CAPZA2	0.225831	7.11468e-101	2.81708e-100	21.3264
NAIPP4	0.474921	8.28904e-101	3.27982e-100	21.3193
RAB39A	0.353342	9.19912e-101	3.63867e-100	21.3144
LINC01638	1.10806	1.20679e-100	4.76929e-100	21.3023
DGKE	0.314972	1.19058e-100	4.70605e-100	21.3023
CHP1	0.375405	1.32484e-100	5.23406e-100	21.2973
NEUROG2	0.692949	2.85011e-100	1.12464e-99	21.2615
ABCC1	0.173709	3.3841e-100	1.33443e-99	21.2532
EEF1A2	0.29985	6.3088e-100	2.48431e-99	21.224
SLC6A6	0.194524	1.0602e-99	4.17277e-99	21.1995
ACSS2	0.328886	1.1415e-99	4.49196e-99	21.1961
SPATA9	0.582606	1.34314e-99	5.28273e-99	21.1885
ZFHX2	0.145915	1.79907e-99	7.07112e-99	21.1746
SLC2A9	0.350067	2.08279e-99	8.18208e-99	21.1677
TPTEP2-CSNK1E	0.139738	3.99404e-99	1.56689e-98	21.1369
NCOA6	0.140719	4.55099e-99	1.78508e-98	21.1307
SLC41A2	0.171923	5.00956e-99	1.96461e-98	21.1262
SLC16A2	0.192002	9.54272e-99	3.73729e-98	21.0957
SLC6A15	0.261158	1.30489e-98	5.10783e-98	21.0809
MINDY3	0.22573	1.3663e-98	5.34731e-98	21.0787
RAP1GAP2	0.139794	2.93289e-98	1.14551e-97	21.0425
CXCL13	0.549391	3.36625e-98	1.31432e-97	21.0361
MMP11	0.579066	5.56151e-98	2.16997e-97	21.0123
DIP2B	0.121448	6.63253e-98	2.58742e-97	21.0037
HLF	0.476844	7.33434e-98	2.86023e-97	20.999
CROCCP3-1	0.139258	9.52034e-98	3.70958e-97	20.9866
CALCOCO1	0.184736	1.28803e-97	5.01623e-97	20.9722
SLC4A5	0.212166	3.12279e-97	1.21473e-96	20.93
RAB11FIP4	0.154672	3.26865e-97	1.27125e-96	20.9278
ENSG00000295149	1.16778	5.04943e-97	1.96151e-96	20.9076
LMBRD1	0.187091	7.01208e-97	2.72163e-96	20.8913
MCF2	0.304507	1.84832e-96	7.15827e-96	20.845
TES	0.545622	1.86764e-96	7.23187e-96	20.8447
GUCY1A2	0.125411	2.54869e-96	9.8657e-96	20.8296
ZNF195	0.230412	7.91532e-96	3.05931e-95	20.7752
TCF20	0.118362	8.48146e-96	3.27757e-95	20.7718
ENSG00000306390	0.561182	9.82169e-96	3.79421e-95	20.7649
MFSD6	0.185771	1.03801e-95	4.00926e-95	20.7621
BCL7A	0.179795	2.08714e-95	8.05065e-95	20.7285
BLTP3B	0.199776	2.65425e-95	1.02261e-94	20.717
IDS	0.240928	3.32554e-95	1.2806e-94	20.7061
DCTN2	0.241643	4.37218e-95	1.68336e-94	20.6929
BCORL1	0.257384	6.10744e-95	2.35028e-94	20.6768
MYRIP	0.177355	8.91333e-95	3.42718e-94	20.6585
MXI1	0.169799	1.09115e-94	4.19406e-94	20.6487
ENSG00000297122	0.680046	1.86982e-94	7.18346e-94	20.6228
LINC00845	0.530687	1.9456e-94	7.47209e-94	20.6208
ENSG00000305962	0.422069	2.01463e-94	7.73464e-94	20.6191
LRP2BP-AS1	0.343436	2.62158e-94	1.00581e-93	20.6063
PANX1	0.275829	3.3121e-94	1.27032e-93	20.595
EXOSC10	0.162919	7.42226e-94	2.84057e-93	20.5558
ENSG00000295056	0.516555	1.59811e-93	6.10696e-93	20.5186
ACTR1A	0.208524	5.82136e-93	2.21792e-92	20.4555
MYO5A	0.114782	6.93556e-93	2.64112e-92	20.4469
ENSG00000225420	0.940211	8.70024e-93	3.31093e-92	20.4362
FOXN2	0.238373	1.06542e-92	4.0525e-92	20.426
SNHG29	0.21708	2.85079e-92	1.08238e-91	20.3778
RNF44	0.274247	3.1254e-92	1.18605e-91	20.3733
TBCK	0.127878	4.27016e-92	1.61994e-91	20.358
PDE3B	0.135715	8.61985e-92	3.26467e-91	20.3235
TAGAP-AS1	0.201968	1.10518e-91	4.18298e-91	20.3113
HDAC7	0.2343	1.75107e-91	6.61674e-91	20.2887
TMEM50A	0.281918	1.80908e-91	6.83369e-91	20.2871
LRRC8B	0.23338	2.25315e-91	8.50834e-91	20.2763
ERP44	0.178679	2.37008e-91	8.9484e-91	20.2738
CAVIN4	0.276197	3.52245e-91	1.32949e-90	20.2543
PYGO1	0.206457	4.78414e-91	1.80451e-90	20.2392
OSBPL9	0.140105	9.7591e-91	3.67496e-90	20.204
CLIP1	0.11489	9.97997e-91	3.75752e-90	20.2029
USP24	0.125133	1.36596e-90	5.14123e-90	20.1873
ZKSCAN7	0.287746	1.58722e-90	5.97108e-90	20.18
ZNF630	0.366621	2.78887e-90	1.04711e-89	20.1521
ENSG00000286679	0.98416	3.47809e-90	1.30546e-89	20.1416
ENSG00000306731	1.31309	5.50534e-90	2.06367e-89	20.1191
TTLL1	0.21415	7.2107e-90	2.70116e-89	20.1049
ENSG00000278989	0.419183	7.99759e-90	2.99545e-89	20.0998
PARD6G	0.1746	1.26793e-89	4.7443e-89	20.0769
SINHCAF	0.319825	1.27086e-89	4.75453e-89	20.0768
LZTS1	0.169008	1.39697e-89	5.22293e-89	20.072
SP2-AS1	0.431647	1.56775e-89	5.85952e-89	20.0664
UBE2L6	0.435081	1.78563e-89	6.67168e-89	20.0599
UBE2Q2P1	0.177147	3.27166e-89	1.222e-88	20.0297
GPATCH2L	0.152904	3.62511e-89	1.35335e-88	20.0246
CCDC92	0.124546	3.6423e-89	1.35955e-88	20.0243
RTF1	0.143499	3.86292e-89	1.44167e-88	20.0214
EPC2	0.142091	3.91675e-89	1.46152e-88	20.0207
SMG6	0.122333	4.86252e-89	1.81237e-88	20.0099
UNC5C	0.183675	8.02653e-89	2.98876e-88	19.9849
ZNF286A-TBC1D26	0.589904	8.81825e-89	3.28145e-88	19.9803
ITPR1-DT	1.16535	9.47654e-89	3.5247e-88	19.9771
ACVR2B	0.180324	9.40814e-89	3.49982e-88	19.977
VTI1A	0.124484	9.88541e-89	3.67439e-88	19.9745
CASTOR3P	0.135089	1.07032e-88	3.97774e-88	19.9705
ENSG00000294779	0.565882	2.36889e-88	8.79094e-88	19.9309
APBB1	0.188722	5.19365e-88	1.9255e-87	19.8914
ZC3H8	0.173723	7.75381e-88	2.87372e-87	19.8713
TECPR1	0.189338	7.92191e-88	2.93555e-87	19.8702
PI4KA	0.120154	1.10234e-87	4.08351e-87	19.8536
ENSG00000267694	0.847517	2.74954e-87	1.01625e-86	19.8079
ENSG00000230325	0.362046	3.7461e-87	1.3837e-86	19.792
TGFB3	0.465943	4.29364e-87	1.58518e-86	19.7852
NR2C2	0.148907	4.33671e-87	1.60082e-86	19.7846
ENSG00000295175	0.810481	5.04928e-87	1.86296e-86	19.7773
SGTB	0.258654	6.05474e-87	2.2325e-86	19.7678
ZFP30	0.160536	6.26766e-87	2.31063e-86	19.766
QSOX2	0.249313	1.10173e-86	4.05644e-86	19.7375
NHLH1	1.0306	2.20603e-86	8.11193e-86	19.7029
ZNF737	0.208117	2.3219e-86	8.53528e-86	19.6998
OGA	0.109336	2.63833e-86	9.6923e-86	19.6933
HBP1	0.233646	2.86051e-86	1.05051e-85	19.6892
DAPK1	0.114368	3.18895e-86	1.17095e-85	19.6837
ANKHD1-DT	0.3213	3.9267e-86	1.44161e-85	19.6732
TRIM44	0.123856	4.22377e-86	1.55018e-85	19.6694
DENND4A	0.138902	1.09479e-85	4.01162e-85	19.6211
C2CD5	0.132246	1.19626e-85	4.38133e-85	19.6165
OVCH1	0.432669	1.22112e-85	4.47168e-85	19.6156
MET	0.691783	1.93578e-85	7.07971e-85	19.5922
PPFIA3	0.233317	2.65102e-85	9.68629e-85	19.576
WDR70	0.114671	3.62255e-85	1.32235e-84	19.5601
KRBA2	0.210111	3.94704e-85	1.44057e-84	19.5557
TVP23C	0.117536	5.36205e-85	1.95546e-84	19.5401
CYREN	0.268044	5.87975e-85	2.14324e-84	19.5354
ENSG00000257458	0.44366	7.79806e-85	2.84023e-84	19.521
EPHB2	0.112	3.98591e-84	1.44672e-83	19.4373
LINC02416	1.24516	9.44748e-84	3.42309e-83	19.3935
AMER2	0.286242	1.03284e-83	3.7405e-83	19.3884
ENSG00000297769	1.07227	1.35418e-83	4.90117e-83	19.3748
ZNF892	0.164369	1.41797e-83	5.13125e-83	19.3721
RAB10	0.130692	1.50823e-83	5.45702e-83	19.3689
FRZB	0.553817	2.23826e-83	8.08691e-83	19.3486
RPL37A	0.207737	2.96732e-83	1.07143e-82	19.334
SOX12	0.278628	3.94006e-83	1.42244e-82	19.3194
ENSG00000308458	0.803326	4.35003e-83	1.56971e-82	19.3145
FZD4-DT	0.741663	6.58669e-83	2.37495e-82	19.293
ZDHHC2	0.224395	7.35963e-83	2.65198e-82	19.287
SYT9-AS1	0.608813	8.07084e-83	2.90735e-82	19.2824
PCDHA4	0.413854	1.4775e-82	5.31407e-82	19.251
LPAR2	0.246336	1.53554e-82	5.52195e-82	19.249
DNAJB5	0.27462	1.8402e-82	6.6134e-82	19.2396
HIP1R	0.157343	1.99417e-82	7.16562e-82	19.2354
ENSG00000248540	0.947771	2.42915e-82	8.72454e-82	19.2255
SLC20A1	0.248191	2.54379e-82	9.13343e-82	19.2228
EFCAB13-DT	0.120908	3.17778e-82	1.13955e-81	19.2112
MEX3D	0.31469	3.29572e-82	1.18148e-81	19.2093
LMTK3	0.165836	4.5187e-82	1.61864e-81	19.1929
CSDE1	0.15918	6.43285e-82	2.30323e-81	19.1745
CRPPA	0.217277	7.48108e-82	2.67728e-81	19.1667
RSBN1L	0.145494	7.67635e-82	2.74674e-81	19.1653
MAP3K9	0.191285	1.14234e-81	4.08434e-81	19.1446
AMOT	0.353327	1.14895e-81	4.10732e-81	19.1444
TIAM1	0.131943	2.93658e-81	1.04881e-80	19.0953
NBEAL1	0.139219	3.41294e-81	1.21875e-80	19.0875
LRRC40	0.200284	3.45051e-81	1.23197e-80	19.0869
G3BP2	0.169438	3.99566e-81	1.42573e-80	19.0792
AFDN-DT	0.249843	4.80498e-81	1.71424e-80	19.0696
SLMAP	0.141242	6.03014e-81	2.14967e-80	19.0577
HAPSTR1	0.207302	6.06868e-81	2.16307e-80	19.0574
CUX1	0.108987	1.06427e-80	3.78871e-80	19.0279
ENSG00000237316	1.21087	1.24475e-80	4.42915e-80	19.0202
SKIC3	0.122087	1.41502e-80	5.03423e-80	19.013
ENSG00000287332	0.547331	1.96131e-80	6.97236e-80	18.996
CFAP161	0.210344	4.96191e-80	1.76149e-79	18.947
CYP51A1	0.229193	5.68074e-80	2.01605e-79	18.9399
ENSG00000300109	0.406968	6.03178e-80	2.1403e-79	18.9368
PPA1	0.235879	7.42877e-80	2.6356e-79	18.9258
EIF4G2	0.145147	9.19589e-80	3.26103e-79	18.9145
ZNF493	0.176274	2.30158e-79	8.14675e-79	18.866
ENSG00000305049	0.480115	3.76589e-79	1.33176e-78	18.84
DUSP4	0.396385	4.34292e-79	1.53558e-78	18.8325
STX6	0.166832	4.38266e-79	1.54916e-78	18.8319
ENSG00000289165	0.660562	6.50733e-79	2.29911e-78	18.8111
ENSG00000242880	0.25497	1.12817e-78	3.98165e-78	18.7818
NPC1	0.203552	1.42606e-78	5.02839e-78	18.7693
KIRREL1	0.131822	1.91771e-78	6.75782e-78	18.7536
ZNF562	0.185103	2.20384e-78	7.76492e-78	18.7462
ENSG00000299894	0.698199	2.4155e-78	8.5081e-78	18.7415
C1QL3	0.981574	2.88969e-78	1.01736e-77	18.732
RALGAPA2	0.100351	6.32099e-78	2.22031e-77	18.69
PCDHA5	0.368435	7.06488e-78	2.48009e-77	18.6841
EIF2B3	0.15835	8.4338e-78	2.95975e-77	18.6746
LRRN2	0.133481	1.12949e-77	3.96141e-77	18.659
SLC11A2	0.214105	1.4078e-77	4.9345e-77	18.6472
RSAD2	0.592903	1.57017e-77	5.50277e-77	18.6415
EIF4A1	0.236794	1.87593e-77	6.56933e-77	18.6318
LRP1	0.111988	2.17978e-77	7.62872e-77	18.6238
GARS1-DT	0.159211	2.4853e-77	8.69401e-77	18.6168
TVP23C-CDRT4	0.16748	2.902e-77	1.01486e-76	18.6084
SH3D21	0.350848	3.02353e-77	1.05704e-76	18.6063
TRAK1	0.139344	3.3785e-77	1.18078e-76	18.6003
DOCK9	0.115173	4.11538e-77	1.43723e-76	18.5897
YAE1	0.293893	4.2495e-77	1.48384e-76	18.588
IRAK1BP1	0.147449	9.17445e-77	3.19819e-76	18.5466
SSTR2	0.276358	9.59064e-77	3.34277e-76	18.5443
ENSG00000298185	0.597457	1.01468e-76	3.53554e-76	18.5413
ENSG00000254092	0.678924	1.17957e-76	4.10947e-76	18.5332
LINC02145	0.455802	1.35827e-76	4.73059e-76	18.5256
NEDD9	0.19857	1.60052e-76	5.57346e-76	18.5167
ENSG00000286565	0.385384	1.94082e-76	6.75541e-76	18.5063
BDP1	0.100511	1.9924e-76	6.93286e-76	18.5049
UBXN7	0.155699	2.11637e-76	7.36198e-76	18.5016
ZNF84	0.146406	2.56878e-76	8.92898e-76	18.4912
ENSG00000290046	0.246372	5.25242e-76	1.82352e-75	18.4525
KCNQ1OT1	0.109911	6.40628e-76	2.2231e-75	18.4418
GPR176	0.279624	6.89821e-76	2.39345e-75	18.4378
UBQLN1	0.180615	8.26415e-76	2.8648e-75	18.428
NCOR2	0.110055	8.30709e-76	2.87925e-75	18.4277
ENSG00000287908	0.405784	9.05189e-76	3.13598e-75	18.4231
ENSG00000298455	0.958779	1.22811e-75	4.25216e-75	18.4069
RNF103	0.293743	1.31553e-75	4.55278e-75	18.4028
N4BP1	0.160394	1.64358e-75	5.68637e-75	18.3907
JMY	0.206069	2.8868e-75	9.97112e-75	18.3602
ADGRB3	0.0739127	3.92498e-75	1.3553e-74	18.3435
METTL9	0.176866	3.97101e-75	1.37099e-74	18.3428
SLC12A2	0.17777	5.03886e-75	1.73887e-74	18.3299
USP15	0.11982	7.03806e-75	2.4266e-74	18.3117
EHMT1	0.0913137	8.23871e-75	2.83971e-74	18.3031
ENSG00000297908	0.830894	8.65381e-75	2.9819e-74	18.3007
GMEB1	0.196462	8.72517e-75	3.00604e-74	18.3
ENSG00000283175	0.658938	1.54684e-74	5.31889e-74	18.2688
CASP2	0.240818	1.73093e-74	5.95011e-74	18.2626
RALA	0.183337	2.09745e-74	7.20896e-74	18.2521
MAP3K10	0.173568	2.73935e-74	9.40391e-74	18.2375
ENSG00000281039	0.206689	6.73564e-74	2.30849e-73	18.1882
ENSG00000260949	0.357006	1.04207e-73	3.56562e-73	18.1643
SERPING1	0.406447	1.46783e-73	5.01868e-73	18.1455
ENSG00000299335	0.986647	1.5827e-73	5.40985e-73	18.1416
PLCXD2	0.28956	1.91534e-73	6.54296e-73	18.1308
ARL10	0.181192	2.08214e-73	7.1117e-73	18.1262
PKD2	0.126001	2.44263e-73	8.34048e-73	18.1174
ALG9	0.184166	3.26836e-73	1.11484e-72	18.1014
MIR9-1HG	0.0987411	3.6193e-73	1.23436e-72	18.0958
CNOT2	0.130167	6.51935e-73	2.22013e-72	18.0633
B4GALNT1	0.216289	7.13137e-73	2.42819e-72	18.0583
GPRC5B	0.260049	8.62345e-73	2.93537e-72	18.0478
ENSG00000298442	0.676348	9.1576e-73	3.11673e-72	18.0447
HES6	0.510936	9.4045e-73	3.19981e-72	18.0431
SEZ6L2	0.187817	1.32089e-72	4.48892e-72	18.0242
PROKR2	0.552933	1.32465e-72	4.50105e-72	18.0242
TMEM59	0.251182	1.52306e-72	5.1714e-72	18.0164
ARIH1	0.110387	1.6397e-72	5.56497e-72	18.0122
CHMP3	0.226182	1.67566e-72	5.68533e-72	18.0111
XRN2	0.136786	1.93796e-72	6.57336e-72	18.003
IAH1	0.234137	2.20059e-72	7.46305e-72	17.996
ORC4	0.166155	2.89429e-72	9.80987e-72	17.9808
HIVEP2-DT	0.520169	4.22099e-72	1.42939e-71	17.9599
KLHL15	0.411768	7.00332e-72	2.36846e-71	17.9317
SYNCRIP	0.15108	7.25387e-72	2.45283e-71	17.9297
ALS2	0.172045	7.42168e-72	2.50921e-71	17.9284
LINC01103	0.959349	7.74092e-72	2.6156e-71	17.9264
CORO7	0.203523	7.89381e-72	2.66687e-71	17.925
RASGRP1	0.285923	1.33282e-71	4.49823e-71	17.8959
ANP32A	0.143952	2.24517e-71	7.56738e-71	17.8667
MAN2B2	0.275614	2.90122e-71	9.77145e-71	17.8524
ENSG00000301679	0.578302	8.73546e-71	2.93441e-70	17.7909
ZNF154	0.169759	8.78222e-71	2.94968e-70	17.7904
ENSG00000288936	0.835392	1.01873e-70	3.4211e-70	17.7823
TRIM33	0.119696	1.24227e-70	4.16998e-70	17.771
ENSG00000296449	0.526345	1.31078e-70	4.39929e-70	17.768
ENSG00000290948	0.232767	1.7374e-70	5.82859e-70	17.7522
RPAIN	0.183897	1.9682e-70	6.59901e-70	17.7451
BMS1P1	0.406388	2.16485e-70	7.25622e-70	17.7398
ENSG00000287231	0.636712	2.57667e-70	8.63534e-70	17.7301
CAMKK2	0.153892	2.58005e-70	8.64539e-70	17.7299
MBOAT2	0.0988385	3.68011e-70	1.2319e-69	17.7099
ENSG00000246465	0.434807	4.07437e-70	1.36348e-69	17.7042
DDX10	0.139691	4.71943e-70	1.57843e-69	17.6959
LINC02641	0.305828	4.97147e-70	1.66248e-69	17.693
TMCC2	0.250564	6.26307e-70	2.09318e-69	17.68
MTMR9	0.19798	6.45337e-70	2.15647e-69	17.6783
ASPHD1	0.224438	7.05061e-70	2.35536e-69	17.6733
TDP2	0.255602	7.1373e-70	2.38397e-69	17.6726
RTN4R	0.325232	7.71681e-70	2.57679e-69	17.6682
ENSG00000253108	0.76021	1.73824e-69	5.79003e-69	17.6225
ENSG00000309099	0.660185	1.798e-69	5.98822e-69	17.6205
CSNK1E	0.141397	1.90074e-69	6.32945e-69	17.6172
TCP11L1	0.171511	1.95105e-69	6.49607e-69	17.6157
RAB6A	0.119485	5.23737e-69	1.73851e-68	17.5597
ELAVL2	0.133397	5.41148e-69	1.79552e-68	17.5579
ENSG00000287255	0.948243	6.28756e-69	2.0853e-68	17.5496
ZNF711	0.137572	1.00695e-68	3.33577e-68	17.5226
LMNA	0.114549	1.25077e-68	4.14167e-68	17.5102
GOLM1	0.11415	2.46172e-68	8.14097e-68	17.4716
ENSG00000308733	0.389455	4.04803e-68	1.33754e-67	17.4432
CT75-1	0.709263	4.35589e-68	1.43843e-67	17.4391
MAGED1	0.132164	5.33093e-68	1.75865e-67	17.4274
RUFY2	0.11048	6.54398e-68	2.15759e-67	17.4157
ENSG00000298699	0.339226	7.52411e-68	2.47968e-67	17.4078
CRADD	0.149456	9.20324e-68	3.02959e-67	17.3962
FOXO6	0.2004	9.24479e-68	3.04283e-67	17.3959
CYTH1	0.118791	9.3621e-68	3.081e-67	17.3952
PTPRK-AS1	0.791661	1.41775e-67	4.66306e-67	17.3715
GOSR2	0.182405	1.53435e-67	5.04582e-67	17.3669
CNOT6	0.130447	1.88688e-67	6.20249e-67	17.355
ENSG00000287910	0.372197	2.35899e-67	7.74884e-67	17.3422
MFSD14CP-1	0.117784	2.60524e-67	8.55529e-67	17.3364
ENSG00000296315	1.00052	2.66686e-67	8.75515e-67	17.3354
ENSG00000263551	0.426561	3.0845e-67	1.0119e-66	17.3268
LMF1	0.136707	3.11259e-67	1.02097e-66	17.3262
ZNF738	0.213194	6.00263e-67	1.9667e-66	17.2883
TCAF1	0.208141	6.922e-67	2.2676e-66	17.2801
ABCC10	0.206752	7.42608e-67	2.43204e-66	17.2761
GDPD1	0.155008	8.22549e-67	2.69231e-66	17.2702
ATF2	0.146485	1.09087e-66	3.56905e-66	17.2538
ZNF652	0.146701	1.2053e-66	3.9423e-66	17.2481
PUDP	0.157724	1.24498e-66	4.07151e-66	17.2462
ZBTB44	0.15905	1.28186e-66	4.1915e-66	17.2445
DLGAP1-AS4	0.356854	1.34858e-66	4.40844e-66	17.2416
RIN2	0.141831	1.47407e-66	4.81729e-66	17.2364
TXNDC16	0.151936	1.50454e-66	4.91617e-66	17.2353
SCAPER	0.0812349	1.63626e-66	5.34503e-66	17.2304
KIAA1614	0.32859	2.13074e-66	6.95735e-66	17.2151
KCNK12	0.328217	2.15184e-66	7.02525e-66	17.2146
HR	1.06023	2.30193e-66	7.51311e-66	17.2109
RNF2	0.216286	2.56079e-66	8.35564e-66	17.2045
CYFIP1	0.142598	3.01809e-66	9.84079e-66	17.1949
ENSG00000300337	1.00045	3.4421e-66	1.12201e-65	17.1876
PAFAH1B3	0.241975	3.57964e-66	1.16651e-65	17.185
PTX3	0.866666	3.79186e-66	1.23532e-65	17.1819
P4HA2	0.36943	4.84428e-66	1.57729e-65	17.1675
ZNF365	0.369301	5.09556e-66	1.65887e-65	17.1645
RASL10A	0.602409	5.16121e-66	1.68e-65	17.1639
SMURF2	0.124819	5.56854e-66	1.81234e-65	17.1594
ZNF589	0.156199	9.82029e-66	3.19024e-65	17.1264
FAM131B-AS1	0.398758	1.14283e-65	3.71053e-65	17.1176
STK31	0.440042	1.16308e-65	3.77522e-65	17.1166
TMEM158	0.549405	1.796e-65	5.82217e-65	17.0913
ABR	0.0973965	2.30823e-65	7.47956e-65	17.0765
PARP11	0.146705	3.07114e-65	9.94326e-65	17.0599
ENSG00000287044	0.355156	3.37924e-65	1.09362e-64	17.0543
SNX27	0.152391	3.49233e-65	1.13006e-64	17.0523
APIP	0.170679	4.13998e-65	1.33906e-64	17.0424
ENSG00000286670	0.287578	4.45874e-65	1.44175e-64	17.0381
NAMA	0.136981	4.53472e-65	1.46612e-64	17.0371
RASL11B	0.959963	4.72011e-65	1.52584e-64	17.035
DSTN	0.219474	5.61625e-65	1.81477e-64	17.0245
ENSG00000289189	0.719454	5.65867e-65	1.82822e-64	17.0243
ENSG00000255250	0.359477	5.75789e-65	1.85975e-64	17.0231
LTO1	0.237367	5.97732e-65	1.93008e-64	17.0209
TBC1D26	0.623211	1.12636e-64	3.63498e-64	16.9838
RPL37	0.182156	1.19581e-64	3.8575e-64	16.9802
PTPN1	0.166634	1.50002e-64	4.8361e-64	16.9669
SLIT2	0.158655	1.59644e-64	5.14625e-64	16.9632
LRRTM2	0.256982	2.38431e-64	7.67526e-64	16.9397
ENSG00000287340	0.527271	2.56976e-64	8.26875e-64	16.9353
ZNF532	0.0947933	4.11124e-64	1.32159e-63	16.9076
ENSG00000288891	0.127076	5.95831e-64	1.91427e-63	16.8857
NIPBL	0.0958832	9.1182e-64	2.92579e-63	16.8605
ENSG00000293678	0.211809	9.66264e-64	3.10005e-63	16.8571
ANK2-AS1	0.346866	9.99623e-64	3.20618e-63	16.8551
KIAA0232	0.11125	1.64646e-63	5.27715e-63	16.8255
ZNF271P-1	0.215661	2.30051e-63	7.36733e-63	16.8057
HCFC2	0.183127	2.5589e-63	8.19027e-63	16.7994
LY6G6C	0.869459	2.61149e-63	8.35627e-63	16.7984
ENSG00000286675	0.415287	3.03764e-63	9.71715e-63	16.7892
ZNF611	0.161444	3.1439e-63	1.00557e-62	16.7872
SLC17A6-DT	0.612246	3.74126e-63	1.19597e-62	16.777
ENSG00000302634	1.20351	4.90488e-63	1.56729e-62	16.7612
SGCB	0.245615	5.04527e-63	1.61125e-62	16.7591
RNMT	0.159087	5.45876e-63	1.74233e-62	16.7544
DDX5	0.115677	6.61862e-63	2.11107e-62	16.7429
SEMA3F	0.247657	1.01215e-62	3.22567e-62	16.7176
MAILR	0.128063	1.222e-62	3.89336e-62	16.7063
PRRT3-AS1	0.358631	2.36147e-62	7.51859e-62	16.667
ENSG00000298083	0.689185	2.62371e-62	8.35119e-62	16.6608
MANEAL	0.32399	2.91142e-62	9.26315e-62	16.6545
MEAK7	0.197457	4.916e-62	1.56237e-61	16.6231
ENSG00000228804	1.09333	5.54668e-62	1.76208e-61	16.6161
FSD1	0.185089	5.84264e-62	1.85559e-61	16.6127
RPS10-NUDT3	0.33722	6.06886e-62	1.92717e-61	16.6105
MAPK12	0.297302	7.43973e-62	2.36086e-61	16.5982
ENSG00000309723	0.844007	8.68706e-62	2.75591e-61	16.5891
HOMER2	0.192944	9.35828e-62	2.96763e-61	16.5844
MSANTD3	0.219759	9.98438e-62	3.16573e-61	16.5805
ACVR1B	0.151213	1.10068e-61	3.48895e-61	16.5747
CALN1	0.107673	1.3889e-61	4.39892e-61	16.5607
ENSG00000300590	0.65907	1.56205e-61	4.94526e-61	16.5537
RNF146	0.220745	1.58639e-61	5.02165e-61	16.5527
GPRC5C	0.835484	1.6724e-61	5.2917e-61	16.5497
DYNLT1	0.277216	1.79361e-61	5.6729e-61	16.5453
CD200	0.164598	1.91625e-61	6.05995e-61	16.5413
ENSG00000303826	0.649123	1.99875e-61	6.31913e-61	16.5389
POLR2B	0.157552	2.15611e-61	6.81381e-61	16.5342
GPSM1	0.135526	2.76374e-61	8.72806e-61	16.5192
TMEM139-AS1	0.463875	3.19255e-61	1.00767e-60	16.5105
PDCD6IP	0.148529	3.97294e-61	1.25313e-60	16.4973
CRBN	0.191377	4.95077e-61	1.56091e-60	16.484
CDKL1	0.143471	6.27779e-61	1.97768e-60	16.4696
ARHGEF7	0.0898404	7.58202e-61	2.38691e-60	16.4582
CTNNAL1	0.273191	7.95261e-61	2.50289e-60	16.4553
SPOCK1	0.107454	1.24737e-60	3.91884e-60	16.428
FNDC1	0.423371	2.9842e-60	9.35746e-60	16.375
ARHGAP23	0.120318	3.07217e-60	9.63201e-60	16.3732
ENSG00000305126	0.53951	3.96998e-60	1.24417e-59	16.3577
FTCDNL1	0.379748	5.60009e-60	1.75314e-59	16.3366
THOC5	0.175483	5.86395e-60	1.83549e-59	16.3338
VPS26B	0.182285	6.80623e-60	2.13014e-59	16.3247
PCMT1	0.17139	7.42967e-60	2.32494e-59	16.3194
MMD	0.354479	9.32695e-60	2.91627e-59	16.3055
ENSG00000276256	0.255139	1.16872e-59	3.65127e-59	16.2917
ARID4B	0.0939057	1.24301e-59	3.88232e-59	16.2879
EBAG9	0.325282	1.43015e-59	4.46438e-59	16.2793
USP20	0.187571	1.72907e-59	5.39603e-59	16.2677
B3GALT1-AS1	0.351762	1.93736e-59	6.04116e-59	16.2607
CAMSAP2	0.0931183	3.90027e-59	1.21241e-58	16.2178
ENSG00000295480	0.461486	4.34227e-59	1.34927e-58	16.2112
NPDC1	0.179067	4.67638e-59	1.45269e-58	16.2066
RUNDC3B	0.121775	4.76413e-59	1.47975e-58	16.2055
UCHL3	0.196713	5.33291e-59	1.65552e-58	16.1985
ATP11B	0.138645	5.66812e-59	1.75934e-58	16.1948
NT5C2	0.111388	7.20192e-59	2.23392e-58	16.18
TALAM1	0.0890458	1.08807e-58	3.37272e-58	16.1546
UNC45A	0.232361	1.2843e-58	3.97884e-58	16.1444
PPP1R18	0.292761	1.75859e-58	5.44091e-58	16.125
TMEM178B	0.0691125	1.88628e-58	5.83284e-58	16.1206
ENSG00000303480	0.724362	2.08393e-58	6.44142e-58	16.1146
NBAT1	0.327678	2.44425e-58	7.54909e-58	16.1046
ENSG00000260661	0.457962	2.51442e-58	7.76371e-58	16.1029
PLPP1	0.165835	2.74062e-58	8.45986e-58	16.0975
FZD3	0.132153	3.1902e-58	9.84369e-58	16.0881
ENSG00000268575	0.190269	3.20213e-58	9.87919e-58	16.0879
ENSG00000304339	0.554587	4.38848e-58	1.35248e-57	16.0684
TMOD2	0.128686	4.81864e-58	1.48405e-57	16.0625
C1orf115	0.643252	8.12407e-58	2.49838e-57	16.0302
GDI1	0.145583	9.3136e-58	2.86343e-57	16.0216
ABCA3	0.11995	1.13118e-57	3.47452e-57	16.0095
ARHGEF7-AS2	0.472335	1.18328e-57	3.63359e-57	16.0067
ENSG00000266667	0.350232	1.711e-57	5.24989e-57	15.9837
NDUFC2-KCTD14	0.369597	2.02936e-57	6.22338e-57	15.9731
ZNF549	0.160502	2.12918e-57	6.52776e-57	15.9701
LEMD3	0.151676	4.74308e-57	1.45164e-56	15.92
ENSG00000259345	0.169078	5.69454e-57	1.74145e-56	15.9086
ZNF486	0.335389	5.72007e-57	1.74903e-56	15.9083
BAHCC1	0.146762	8.23434e-57	2.51548e-56	15.8854
SNRK-AS1	0.418646	8.74563e-57	2.67061e-56	15.8817
LINC01500	0.236729	8.83604e-57	2.69786e-56	15.881
MCMBP	0.189971	9.94505e-57	3.03445e-56	15.8736
ENSG00000267827	0.341047	1.8031e-56	5.49508e-56	15.8362
FAM228A	0.285305	1.83308e-56	5.58572e-56	15.8352
PM20D1-AS1	0.184557	1.87867e-56	5.72312e-56	15.8336
FAM131B	0.305031	1.94139e-56	5.91261e-56	15.8316
ANKRD13C	0.129259	2.04249e-56	6.21968e-56	15.8283
LINC02646	0.327961	2.26645e-56	6.90078e-56	15.8218
HYAL1	0.311114	2.29514e-56	6.98722e-56	15.821
ZNF836	0.259213	2.59318e-56	7.89244e-56	15.8133
LINC00658	0.569637	3.02712e-56	9.2095e-56	15.8036
CRYGS	0.440071	3.32981e-56	1.0129e-55	15.7976
ENSG00000232732	0.656716	3.4414e-56	1.04671e-55	15.7955
PRKAB2	0.284367	4.31928e-56	1.31285e-55	15.7811
AVL9	0.11876	4.38592e-56	1.33293e-55	15.7802
TRIM46	0.216975	4.98177e-56	1.51302e-55	15.7721
ENSG00000308063	1.08531	5.43627e-56	1.65018e-55	15.7668
FRA10AC1	0.15159	5.56242e-56	1.68825e-55	15.7651
SCN3B	0.126112	5.79645e-56	1.75882e-55	15.7625
ENSG00000291073	0.135012	6.69947e-56	2.03121e-55	15.7534
PRH1	0.108477	7.67352e-56	2.32562e-55	15.7448
ATAD2B	0.104644	7.681e-56	2.32758e-55	15.7447
COL9A3	0.378864	8.2015e-56	2.48498e-55	15.7406
C2orf42	0.101791	8.33248e-56	2.52433e-55	15.7396
TRIP12	0.111672	8.64805e-56	2.61959e-55	15.7372
TMEM14B	0.0988806	1.11143e-55	3.36443e-55	15.7213
SENP7	0.0894805	1.16942e-55	3.53951e-55	15.7181
NUTM2B-AS1	0.115545	1.22467e-55	3.70624e-55	15.7152
ZBTB8A	0.161074	1.47129e-55	4.45141e-55	15.7035
ENSG00000292979	0.216443	1.94381e-55	5.87564e-55	15.6859
TIRAP-AS1	0.224886	2.14848e-55	6.49173e-55	15.6795
DDX52	0.185123	2.32983e-55	7.03878e-55	15.6744
NAIPP2	0.419785	2.57539e-55	7.77657e-55	15.668
TCTN2	0.234596	2.65247e-55	8.00826e-55	15.6661
FAM234B	0.243213	3.15357e-55	9.5174e-55	15.6551
CARMIL3	0.161531	3.35998e-55	1.01377e-54	15.6511
ELP2	0.14538	3.85446e-55	1.1625e-54	15.6423
KMT5B	0.0981945	4.69105e-55	1.41297e-54	15.6298
PSEN1	0.130163	4.96523e-55	1.49496e-54	15.6262
NECTIN3-AS1	0.258826	5.29822e-55	1.59397e-54	15.622
PHEX	0.344817	6.75436e-55	2.03126e-54	15.6066
ENSG00000310097	1.02317	9.95877e-55	2.99023e-54	15.582
ENSG00000307217	0.420753	9.98923e-55	2.99899e-54	15.5816
ENSG00000257449	0.27999	1.00051e-54	3.00337e-54	15.5815
PPFIA2-AS1	0.594317	1.02856e-54	3.08716e-54	15.5797
ENSG00000241962	0.121927	1.06596e-54	3.199e-54	15.5774
SLC37A3	0.144633	1.07113e-54	3.2141e-54	15.5771
ENSG00000248863	0.317239	1.09737e-54	3.29198e-54	15.5755
CRYZL1	0.133825	1.22457e-54	3.67115e-54	15.5685
ENSG00000238258	1.078	1.53744e-54	4.60852e-54	15.5542
ELOVL2	0.147545	1.99946e-54	5.98795e-54	15.5371
XXYLT1	0.128068	2.51334e-54	7.52301e-54	15.5224
CAPRIN1	0.131456	2.51493e-54	7.52678e-54	15.5224
PACC1	0.222725	3.36672e-54	1.00708e-53	15.5037
MCPH1	0.117709	4.20646e-54	1.25762e-53	15.4893
ZMYM2	0.092835	5.14644e-54	1.53825e-53	15.4764
VARS1	0.227855	5.29466e-54	1.58234e-53	15.4745
BAHD1	0.26738	7.07081e-54	2.11233e-53	15.4559
ENSG00000286487	0.460151	8.75525e-54	2.61385e-53	15.4422
CLN8	0.303705	1.04903e-53	3.13102e-53	15.4305
ACTR3	0.14207	1.1527e-53	3.43911e-53	15.4244
ENSG00000301612	0.631909	1.50841e-53	4.4963e-53	15.407
TMEM179	0.215839	1.77875e-53	5.29868e-53	15.3963
LIPA	0.150542	1.92123e-53	5.72091e-53	15.3913
ENSG00000310212	0.993674	2.16249e-53	6.43679e-53	15.3839
MSH2	0.103855	2.37678e-53	7.07099e-53	15.3775
ZNF431	0.146461	2.67547e-53	7.95858e-53	15.3699
ENSG00000235410	0.572304	2.7799e-53	8.26709e-53	15.3675
SLC39A11	0.135706	3.82389e-53	1.1363e-52	15.3467
ENSG00000236858	1.10985	4.0926e-53	1.21583e-52	15.3426
H3-3A	0.230897	4.8359e-53	1.43628e-52	15.3315
ENSG00000290993	0.135677	4.89017e-53	1.45221e-52	15.3307
ENSG00000228560	0.84839	4.99839e-53	1.48416e-52	15.3294
BMPR1A	0.101406	5.2197e-53	1.54967e-52	15.3265
CDHR1	0.392008	5.88757e-53	1.74728e-52	15.3187
PLEKHM3	0.130952	6.06092e-53	1.79826e-52	15.3168
F11R	0.292405	6.95026e-53	2.06079e-52	15.3079
ENSG00000298441	1.27379	7.64968e-53	2.26759e-52	15.3019
G2E3-AS1	0.542819	1.03613e-52	3.06822e-52	15.2819
LBH	0.245201	1.24231e-52	3.67643e-52	15.27
PDXDC1	0.121458	1.68359e-52	4.97975e-52	15.2502
YTHDF2	0.15624	1.97396e-52	5.83709e-52	15.2398
ZBTB41	0.204413	1.97564e-52	5.84132e-52	15.2397
ENSG00000289956	0.202757	2.41382e-52	7.13411e-52	15.2266
LINC00907	0.197661	3.08672e-52	9.11471e-52	15.2105
LINC02615	0.220329	4.53032e-52	1.33655e-51	15.1854
ZNF148	0.0947374	5.60409e-52	1.65312e-51	15.1714
[truncated: 20,998 more rows]

## Sheet: Glu-DL
gene	logfoldchange	pval	pval_adj	score
HS3ST4	4.21635	0	0	545.357
GRIK3	3.42991	0	0	468.01
KAZN	2.25035	0	0	367.081
GAS7	2.90639	0	0	355.052
SORCS1	3.29224	0	0	343.771
OPCML	2.4058	0	0	331.385
DSCAML1	2.13279	0	0	325.943
RGS6	3.01459	0	0	320.593
PDE1A	2.46178	0	0	318.058
CTNND2	1.31286	0	0	315.284
LMO7	2.38743	0	0	307.017
TLE4	2.79418	0	0	306.157
KHDRBS3	2.46801	0	0	301.306
DPP10	2.48069	0	0	291.274
NLGN1	1.77712	0	0	286.53
KLHL1	2.62774	0	0	281.358
CLSTN2	2.58696	0	0	275.767
IGSF21	2.24428	0	0	265.51
ASTN2	2.16194	0	0	264.755
TRPM3	2.40005	0	0	261.394
C8orf34	2.13688	0	0	261.122
ADAMTSL1	2.45209	0	0	258.524
EFNA5	2.25483	0	0	250.078
PDZD2	2.18226	0	0	246.997
RGS7	1.64419	0	0	243.913
LRP1B	1.97525	0	0	242.506
SOX5	1.33032	0	0	240.784
PCSK5	2.60842	0	0	240.193
AFF3	1.13244	0	0	235.719
CACNA1E	1.42903	0	0	235.425
DSCAM	1.39702	0	0	234.185
ZFPM2	2.12979	0	0	232.067
RYR3	2.13828	0	0	231.479
AGAP1	1.29565	0	0	230.974
GABRG3	2.25852	0	0	230.638
KCNMA1	1.8341	0	0	229.343
DAB1	1.31985	0	0	228.891
GRM5	1.86623	0	0	228.838
TSHZ3	2.19099	0	0	228.197
GRIN2B	1.51947	0	0	221.271
NTRK3	1.41043	0	0	218.581
NIN	1.61784	0	0	217.031
ST18	3.02553	0	0	216.936
NRCAM	1.58599	0	0	213.874
EGFEM1P	1.98946	0	0	210.946
CNTNAP5	1.88059	0	0	208.349
LMO3	2.08874	0	0	208.161
BCL11B	1.74077	0	0	208.079
B3GAT1	1.74614	0	0	206.891
CDH18	2.37683	0	0	206.043
PEX5L	2.1456	0	0	205.795
PLXDC2	2.12536	0	0	203.485
TMEM178A	2.49595	0	0	202.675
ST6GALNAC3	1.61578	0	0	198.945
TOX	1.69346	0	0	195.919
SLC24A2	1.79138	0	0	195.78
ARHGAP44	1.80904	0	0	195.73
CARMIL1	1.89248	0	0	194.791
CRYM	3.40204	0	0	191.898
BACE2	2.90878	0	0	191.46
DMD	1.33157	0	0	190.825
SLIT3	2.59672	0	0	190.217
OSBPL10	1.78085	0	0	189.693
MDGA2	1.60771	0	0	188.656
SLC4A10	1.36874	0	0	186.749
COL12A1	2.61373	0	0	185.275
PPM1E	1.32085	0	0	185.26
PPM1L	1.42296	0	0	184.44
RALYL	1.37653	0	0	182.778
SH3GL2	1.52496	0	0	181.803
CDHR3	1.58251	0	0	180.507
CACNA1A	1.36492	0	0	179.726
OCA2	2.67456	0	0	179.681
RBFOX1	0.851552	0	0	179.658
SNHG14	0.983495	0	0	178.154
PTPRD	0.788786	0	0	178.098
NFIA	1.23244	0	0	177.665
MARCHF3	2.03091	0	0	176.547
PRICKLE2	1.49515	0	0	176.513
GRIA2	1.12818	0	0	176.357
SLIT1	1.37896	0	0	175.768
TMEM108	0.964917	0	0	174.953
MTUS2	1.73868	0	0	174.916
CACNA2D3	1.57672	0	0	173.444
NRG3	1.05157	0	0	172.654
MEGF11	2.28723	0	0	171.716
CSMD1	1.29617	0	0	169.698
MLIP	3.10049	0	0	165.825
PTPRU	2.70954	0	0	165.714
LDB2	1.3291	0	0	165.303
GARNL3	1.37695	0	0	163.894
KHDRBS2	1.18741	0	0	163.82
ARPP21	1.12333	0	0	162.573
GRM3	1.45782	0	0	162.268
LINC02082	1.97973	0	0	161.608
MACROD2	1.16411	0	0	160.372
CALN1	1.33787	0	0	159.088
NFIB	1.04263	0	0	158.327
KLHL32	1.66238	0	0	158.263
CNTN1	1.31506	0	0	156.948
AFDN	1.00215	0	0	156.038
SIPA1L1	1.50931	0	0	155.355
PAPPA2	2.65782	0	0	155.156
SSBP3	1.06856	0	0	154.627
ANK3	0.946867	0	0	154.089
APBA1	1.14531	0	0	153.4
SYN3	1.36386	0	0	153.238
LINC01435	2.89253	0	0	152.874
PLEKHA5	1.06448	0	0	152.784
FHIP1A	3.06133	0	0	151.288
SYN2	1.39776	0	0	150.998
EPB41L4A	1.46747	0	0	150.268
GRIK2	1.28016	0	0	149.619
MEF2C	1.11392	0	0	149.429
NGEF	2.38986	0	0	149.248
NELL2	0.9566	0	0	148.975
FAM135B	1.54717	0	0	148.847
ENSG00000260664	1.44892	0	0	148.49
EPHA7	1.28029	0	0	148.477
PRKCE	1.08097	0	0	148.26
USP6NL	1.59092	0	0	147.421
PTPRN2	0.764879	0	0	146.763
MGLL	1.43752	0	0	146.145
HSPA12A	1.59055	0	0	145.317
WASF1	1.2897	0	0	145.108
SEMA3E	2.09322	0	0	142.41
PITPNC1	1.0003	0	0	142.033
PBX1	0.761556	0	0	141.858
SYT6	2.09749	0	0	141.717
CACNB4	1.13539	0	0	141.651
HCRTR2	2.56498	0	0	141.319
STARD13	1.80853	0	0	139.912
GUCY1A2	1.1137	0	0	139.515
CELF2	0.655809	0	0	138.822
ZNF385D	1.48154	0	0	138.672
LINC01122	0.96485	0	0	138.649
SOBP	1.00442	0	0	138.523
TRMT9B	1.37161	0	0	138.499
SEL1L3	1.2227	0	0	137.522
EPHB1	1.03754	0	0	137.073
GAREM1	1.16383	0	0	137.029
CADPS	1.01282	0	0	136.9
SATB1-AS1	1.97355	0	0	136.527
MYO5B	1.33374	0	0	135.953
ANKRD33B	2.9333	0	0	135.628
DYNC1I1	1.10252	0	0	135.404
ENSG00000243155	1.77967	0	0	135.006
DOK6	0.980824	0	0	134.485
NPAS2	1.68139	0	0	134.447
CACNG3	1.91221	0	0	133.553
NPR3	2.98622	0	0	133.453
LRRTM4	1.09001	0	0	133.132
VSNL1	1.93482	0	0	132.055
LINGO2	1.21646	0	0	131.648
NAV2	0.85631	0	0	131.228
PLCL2	1.14217	0	0	131.185
BACH2	0.843855	0	0	131.152
TBR1	1.58629	0	0	130.442
UNC13C	1.5132	0	0	130.335
DOCK9	1.06957	0	0	130.281
STUM	1.49453	0	0	129.793
SLC35F3	1.76688	0	0	129.621
ITSN1	0.838726	0	0	129.381
MICAL2	2.16695	0	0	129.312
ENSG00000303938	1.38739	0	0	128.653
SCD5	1.03558	0	0	128.64
ANO4	1.10479	0	0	127.472
FAM163B	2.13741	0	0	125.628
CNIH3	1.31019	0	0	125.151
ROBO1	0.927872	0	0	124.645
MPPED1	0.898804	0	0	124.178
NEGR1	1.16587	0	0	124.008
ATP2C2	2.44204	0	0	123.515
ENSG00000293389	1.82627	0	0	123.105
GRK3	1.14586	0	0	122.757
RBPJ	1.12836	0	0	122.462
EML1	0.931493	0	0	120.889
SHISA9	1.01779	0	0	120.53
ROBO2	0.732835	0	0	120.51
DOCK4	0.815806	0	0	118.838
NAV3	0.630576	0	0	118.713
CDH22	1.76994	0	0	118.512
SHISA6	1.46656	0	0	118.323
OSBPL3	1.60605	0	0	118.183
CTTNBP2	0.885175	0	0	118.014
HECW2	1.00482	0	0	117.988
NBEA	0.615459	0	0	117.393
CYRIA	1.07611	0	0	117.272
LINC01507	2.88356	0	0	117.251
PDE8B	1.59167	0	0	117.167
NTRK2	1.0643	0	0	117.105
KIAA1217	1.35709	0	0	116.655
FAT4	1.12616	0	0	116.338
XPR1	0.911194	0	0	115.897
TSHZ3-AS1	1.78566	0	0	115.401
TNR	1.06513	0	0	114.974
DNM3	0.818694	0	0	113.977
SMARCA2	0.935712	0	0	113.833
PHACTR1	0.645212	0	0	112.776
NUAK1	1.28072	0	0	112.685
ARHGAP15-AS1	1.94281	0	0	112.136
COL25A1	1.69366	0	0	111.938
NYAP2	0.965156	0	0	111.34
ITPK1	1.1926	0	0	110.457
TANC2	0.642632	0	0	110.248
XKR4	0.88774	0	0	109.845
MEG3	0.867686	0	0	109.676
DSEL-AS1	1.78248	0	0	109.442
ENSG00000293411	3.14458	0	0	109.222
VLDLR-AS1	0.95622	0	0	108.914
NCKAP5	0.837878	0	0	108.782
DLC1	1.59978	0	0	108.465
FAT3	0.734288	0	0	107.183
CDH6	1.63474	0	0	107.077
MARCHF4	0.970412	0	0	106.407
SHISAL1	1.42915	0	0	106.247
ABLIM3	1.39279	0	0	105.255
PRICKLE1	1.64301	0	0	104.901
COL15A1	2.00181	0	0	104.616
ATRNL1	0.815769	0	0	104.579
NALF1	0.64802	0	0	104.228
TARBP1	1.10267	0	0	103.534
ZFHX3	1.01251	0	0	102.216
DPY19L2	1.14529	0	0	101.838
RCAN1	1.20149	0	0	101.741
OLFM3	1.33996	0	0	101.625
TMEM63C	1.09827	0	0	101.504
DOC2B	1.68735	0	0	101.167
ARHGAP20	1.17172	0	0	101.155
LCORL	0.833866	0	0	100.878
PCAT1	1.69152	0	0	100.327
DLG2	0.544695	0	0	99.9438
RASGRF1	1.81789	0	0	99.6225
ANKRD30BL	0.904621	0	0	99.4346
GABBR2	0.847358	0	0	99.3329
ADCY2	1.04664	0	0	99.2827
KCNK9	1.6777	0	0	98.8579
ST3GAL1	0.90426	0	0	98.6352
SSBP2	0.688157	0	0	98.5638
DAP	1.20828	0	0	98.5517
CSGALNACT1	1.10603	0	0	98.5433
SCUBE1	0.915021	0	0	98.3162
SUSD4	1.44997	0	0	97.8135
DGKI	0.781186	0	0	97.2485
ELFN2	1.03321	0	0	96.9394
TNIK	0.672099	0	0	96.6158
FBXW7	0.918029	0	0	96.5339
ELMOD1	1.0043	0	0	96.4948
KCNJ3	1.22743	0	0	96.2974
MYT1L	0.466871	0	0	96.1897
CNTNAP4	1.20782	0	0	95.9554
CELF4	0.841429	0	0	95.6286
HS3ST5	1.07508	0	0	95.4565
KCNN2	1.2578	0	0	95.4131
PPFIA4	1.26513	0	0	95.3275
CABP1	1.86402	0	0	95.2736
GPD1L	1.28153	0	0	94.9554
SEZ6	0.849747	0	0	94.9526
SLC5A8	2.69163	0	0	94.9218
ENSG00000285749	3.44443	0	0	94.4695
NDRG1	1.07772	0	0	94.219
GALNT13	0.980661	0	0	94.2176
DOCK3	0.544413	0	0	94.1414
STT3B	0.99309	0	0	94.009
MCTP1	0.750182	0	0	94.0084
SPTBN4	0.817077	0	0	93.7177
TP53I11	1.23563	0	0	93.7159
SESN3	1.26464	0	0	93.5162
PRKAR2B	0.866334	0	0	93.3529
ABCA15P	3.13714	0	0	93.1964
FAM81A	1.23813	0	0	93.0826
GDPD5	1.43233	0	0	92.4428
SYNDIG1	0.900319	0	0	91.7932
SCN2A	0.829507	0	0	91.4895
NUMB	0.853085	0	0	91.0809
PLEKHH2	1.88277	0	0	90.4355
KCNG1	2.12003	0	0	90.2124
NEURL1B	1.39132	0	0	89.8889
ENSG00000257470	1.90921	0	0	89.0222
ENSG00000286685	1.99304	0	0	88.1521
GNAL	0.948492	0	0	87.7288
CPNE5	1.34661	0	0	87.4873
HRH2	1.74295	0	0	87.4644
PDE1C	0.874229	0	0	87.3213
CACNA1B	0.572873	0	0	87.2521
PDGFC	0.977668	0	0	86.9902
PWRN1	0.759114	0	0	86.0347
SULF2	1.32869	0	0	86.0222
SNX32	0.936413	0	0	85.0751
GPRIN3	1.43361	0	0	84.3912
ENSG00000287373	2.07991	0	0	84.381
FOXP2	0.972382	0	0	84.3378
BRINP3	0.996167	0	0	84.227
INSYN2A	1.43955	0	0	84.0282
SIAH3	1.51707	0	0	83.981
NR4A2	1.97042	0	0	83.7389
FEZF2	2.25991	0	0	83.3603
SLC35F2	1.81559	0	0	83.219
ENSG00000287900	1.54686	0	0	82.4593
SLCO3A1	0.706904	0	0	82.2097
GADL1	2.90853	0	0	82.1919
TMC2	1.37279	0	0	81.9844
ENSG00000294598	1.16484	0	0	81.956
ZNF385B	1.01515	0	0	81.9079
RIMS2	0.720011	0	0	81.886
BCL11A	0.618945	0	0	81.712
IQCA1	1.436	0	0	81.668
ENSG00000286446	0.990303	0	0	81.6047
ADCY5	0.764695	0	0	80.6981
FMN2	0.624026	0	0	80.2914
LARGE1	0.580605	0	0	80.2243
GABRA3	1.07119	0	0	80.1507
RAP1GAP2	0.726839	0	0	80.1024
MAP3K21	1.76276	0	0	79.5619
KCNJ6	0.817315	0	0	79.3537
CCDC171	0.753731	0	0	79.2599
FBXL17	0.683497	0	0	79.122
ENSG00000251680	0.847345	0	0	79.1132
FGF18	2.70493	0	0	79.0134
LRRC1	1.20434	0	0	78.744
WNT7B	2.14277	0	0	78.6832
ENSG00000253288	1.66613	0	0	78.2984
KCNIP1	0.830616	0	0	77.9054
POT1-AS1	0.904161	0	0	77.5655
SLC17A7	1.12011	0	0	77.5197
NSG2	0.680475	0	0	77.4794
ENSG00000299524	3.42545	0	0	77.1665
SPOCK1	0.681162	0	0	76.971
C8orf34-AS1	1.99547	0	0	76.754
ENSG00000302338	2.07301	0	0	76.5285
SLC44A1	0.746819	0	0	76.4028
KLHL5	0.943335	0	0	75.9849
LINC01776	1.30772	0	0	75.9663
SLC26A4	1.42868	0	0	75.5496
PCDH9	0.642651	0	0	75.1646
LRCH1	0.630774	0	0	75.0668
SLC35G1	1.41539	0	0	75.0054
ATP2B2	0.647893	0	0	74.7233
SGSM1	0.771905	0	0	74.4427
ITGB3	2.92931	0	0	74.4427
GALNT14	0.917724	0	0	74.3779
KIAA0319	0.747637	0	0	74.2144
GNAO1-DT	0.810409	0	0	74.1918
FAM153CP	2.28672	0	0	74.1141
ENSG00000259753	3.19013	0	0	74.0045
ADCY1	0.667719	0	0	73.9583
DCC	0.598203	0	0	73.6145
FAR2	0.880601	0	0	73.3663
GALNT9	1.73969	0	0	73.3541
KCTD12	2.19606	0	0	73.2485
CACNG8	0.767534	0	0	73.0787
ENSG00000297419	1.27704	0	0	72.7702
LINC00970	1.37189	0	0	72.7494
ENSG00000262801	0.778297	0	0	72.7062
ENSG00000279161	2.22995	0	0	72.6661
ANKRD44	0.552738	0	0	72.6027
ENSG00000293189	2.15885	0	0	71.3437
ZC3H12B	0.581333	0	0	71.0137
SYT16	0.681994	0	0	70.9871
ADGRL1	0.585671	0	0	70.9435
PCNX2	0.580921	0	0	70.5972
PALM2AKAP2	0.71774	0	0	70.4193
RYR2	0.665105	0	0	70.306
JCAD	1.62647	0	0	69.9808
ZDHHC11B	0.76825	0	0	69.587
MIR137HG	0.675426	0	0	69.5305
DST	0.419899	0	0	69.52
CPVL-AS2	1.35698	0	0	69.3891
SERPINI1	0.987253	0	0	69.3794
BRINP1	0.819797	0	0	69.0357
ERC1	0.453797	0	0	68.8345
MMP16	0.550414	0	0	68.7178
ARMC9	0.797747	0	0	68.5634
GNG7	0.979215	0	0	68.5629
TMC3-AS1	1.15066	0	0	68.4469
ADORA1	1.35686	0	0	68.389
NEURL1	0.915584	0	0	68.2659
ADTRP	2.82682	0	0	68.2239
GRIN1	0.768604	0	0	68.2186
ENSG00000296396	0.644852	0	0	68.1507
SOX4	0.672027	0	0	68.0579
FRMPD3	1.00483	0	0	67.65
LIMCH1	0.495036	0	0	67.6409
PPP1R1B	2.13563	0	0	67.6151
ARHGAP39	0.604974	0	0	67.539
GTF2I-AS1	1.40363	0	0	67.473
TEX2	0.98562	0	0	67.4424
GALNT17	0.659245	0	0	67.4384
ATP8A1	0.655546	0	0	67.413
GPR139	1.80167	0	0	67.4123
FGF14	0.582854	0	0	67.0176
NFASC	0.45578	0	0	67.0143
IGFBP5	1.63464	0	0	66.8646
SH3GL3	0.582074	0	0	66.7156
DLGAP4	0.485424	0	0	66.713
IL1RAPL2	0.93094	0	0	66.6396
HCN1	0.728139	0	0	66.6279
DCLK1	0.388486	0	0	66.5391
CSMD3	0.588404	0	0	66.4805
WNT4	1.73247	0	0	66.4539
CNTNAP3	0.991647	0	0	66.1495
POU6F2	0.961081	0	0	65.8499
FRAS1	0.866577	0	0	65.73
PRKCB	0.805915	0	0	65.3746
CACNA1D	0.703844	0	0	65.3579
RBFOX3	0.452925	0	0	65.1242
LSAMP	0.45738	0	0	64.7587
FRMPD4	0.600879	0	0	64.703
CAMKV	1.01273	0	0	64.6104
GABRA5	1.71218	0	0	64.5004
FRMD3	0.566499	0	0	64.4025
PTPRR	1.20119	0	0	64.1652
DGKD	0.67316	0	0	63.9911
ENSG00000237473	2.60547	0	0	63.9151
ZMIZ1-AS1	0.921537	0	0	63.8295
PACSIN1	1.5478	0	0	63.0269
YPEL2	1.18691	0	0	62.8595
SRRM4	0.446241	0	0	62.7552
ENSG00000309532	2.79438	0	0	62.7503
CSRNP3	0.515932	0	0	62.666
ENSG00000296481	0.599024	0	0	62.6385
GNPTAB	0.700546	0	0	62.5842
COLEC12	1.49011	0	0	62.3632
SYT7	0.79349	0	0	62.3077
ENSG00000297381	3.56455	0	0	62.212
LRRC37B	0.710277	0	0	62.177
WDPCP	0.537455	0	0	61.9859
DIP2A	0.568381	0	0	61.8693
CD47	0.800018	0	0	61.5802
NXPH3	2.79992	0	0	61.4432
TESHL	0.828644	0	0	61.3182
PTPRG-AS1	1.07675	0	0	61.1155
BASP1-AS1	0.500299	0	0	61.048
NFIX	0.439952	0	0	60.9471
CHRNA4	1.06845	0	0	60.492
ARFGEF3	0.572232	0	0	60.4538
ENSG00000306749	0.72306	0	0	60.435
KCNQ5	0.56011	0	0	60.4342
SLC8A3	0.647625	0	0	60.0362
CDR2	0.702158	0	0	59.9615
RGS9	1.22267	0	0	59.7717
ATP2B4	0.717782	0	0	59.7715
RANBP17	0.596842	0	0	59.6429
SYNJ2	1.46712	0	0	59.5813
CACNA1C	0.438338	0	0	59.5001
ABI3BP	1.88392	0	0	59.359
SGK1	0.651922	0	0	59.1173
STAMBPL1	1.4569	0	0	59.0815
CHD3	0.451691	0	0	59.0282
MSRA-DT	1.29508	0	0	58.9606
ZFYVE28	0.901067	0	0	58.9423
GABRB3	0.434789	0	0	58.5066
KIT	1.1556	0	0	58.2022
FMNL2	0.381863	0	0	58.1167
ENSG00000301837	1.78471	0	0	57.9481
KCNAB1	0.897846	0	0	57.8168
BEND6	1.15221	0	0	57.7491
CHST1	1.34739	0	0	57.6716
NR4A3	1.41639	0	0	57.5654
SUSD1	0.668151	0	0	57.541
SORCS3	0.605042	0	0	57.387
ENSG00000228655	1.74471	0	0	57.3255
CES4A	1.02068	0	0	57.2984
SATB1	1.15085	0	0	57.1408
ADGRG6	1.29694	0	0	57.0706
CIDEA	3.49765	0	0	57.0191
SGMS1	0.607919	0	0	56.9724
HS3ST2	1.07409	0	0	56.649
ENSG00000309720	1.18244	0	0	56.4518
IGFL4	1.58478	0	0	56.3028
RALGPS2	0.557986	0	0	56.0982
FAM171B	0.708531	0	0	56.0695
PCSK2	0.57446	0	0	56.0033
SLC6A17	1.17678	0	0	55.9683
SLC8A1-AS1	1.01514	0	0	55.7381
ENSG00000286677	0.84939	0	0	55.6986
GSG1L	1.06064	0	0	55.535
NRSN1	0.904843	0	0	55.4513
PLPPR5-AS1	0.634253	0	0	55.3896
POU2F2	0.526969	0	0	55.3849
TRAF3	0.615003	0	0	55.2024
HIVEP2	0.448288	0	0	55.1357
ACBD6	0.502226	0	0	55.0597
RAI14	0.486941	0	0	55.0178
HAS3	2.25657	0	0	54.9393
FSTL5	0.550479	0	0	54.7891
KLHL14	1.03557	0	0	54.5426
EPB41L1	0.465129	0	0	54.4428
DPY19L3	0.547808	0	0	54.4409
LINC02770	2.55307	0	0	54.4199
ENSG00000287018	3.06591	0	0	54.3715
ENSG00000286736	0.821259	0	0	54.1549
TTC23L	1.21845	0	0	54.0784
LZTS1	0.624405	0	0	54.0705
GFRA1	1.2473	0	0	54.0644
ENSG00000303475	1.36138	0	0	53.8624
LRRC63	1.16061	0	0	53.8546
CHL1	0.409087	0	0	53.7066
CDH1	1.86148	0	0	53.6836
ENSG00000267922	1.02013	0	0	53.6178
IGSF3	0.572823	0	0	53.369
ENSG00000250149	2.22723	0	0	53.2129
SMCO4	1.17886	0	0	53.1734
ENTREP2	0.576237	0	0	53.1403
ITGA9	0.783785	0	0	53.0413
IQSEC2	0.799607	0	0	53.0363
TLE1-DT	1.78885	0	0	53.0291
ENSG00000296831	2.24739	0	0	53.0196
ZNF860	2.09908	0	0	52.7586
WASF3	0.755136	0	0	52.696
ENSG00000290551	1.7394	0	0	52.4545
TIMP2	0.52371	0	0	52.3778
PCDH17	0.812879	0	0	52.3579
CELF6	0.839849	0	0	52.3547
ADAMTS14	1.5661	0	0	52.1336
SCARB1	0.697624	0	0	52.0613
JAKMIP3	0.76995	0	0	51.8096
ANKRD36	0.297161	0	0	51.6449
HMGCLL1	0.772715	0	0	51.3453
KAT6B	0.376061	0	0	51.2525
BRINP2	0.785002	0	0	51.1168
TBC1D32	0.483955	0	0	50.9289
AGBL4	0.523069	0	0	50.8082
PSD2	0.620082	0	0	50.7148
GPR22	1.73203	0	0	50.5572
ATP1A3	0.499771	0	0	50.4932
GREM2	0.933298	0	0	50.4775
DPF3	0.710477	0	0	50.3431
FXYD6	0.420521	0	0	50.29
GPR37	2.20721	0	0	50.26
SULF1	1.18486	0	0	50.0508
NMNAT2	0.377038	0	0	50.0273
GRM4	1.01121	0	0	49.8498
SDK2	0.515951	0	0	49.8476
ENSG00000290192	1.99965	0	0	49.6132
SYT13	0.827475	0	0	49.6024
LINC02955	1.50597	0	0	49.3117
ARHGEF28	1.06302	0	0	49.2479
TENM1	0.476276	0	0	49.1793
LINC02223	1.02296	0	0	49.1736
SYT1	0.318607	0	0	49.1248
ASIC2	0.572235	0	0	49.0614
DSEL	0.957059	0	0	49.0398
ENSG00000253553	0.623262	0	0	48.961
ENSG00000257522	0.624845	0	0	48.9326
RGMA	0.778797	0	0	48.8723
SVOP	0.534657	0	0	48.7028
MAP7D2	0.783192	0	0	48.7028
ENSG00000290928	0.327622	0	0	48.5909
GLCE	0.552447	0	0	48.5442
IPCEF1	0.837143	0	0	48.5375
KCNB1	0.642853	0	0	48.432
DNAH5	0.819376	0	0	48.2995
CADM1	0.349422	0	0	48.296
CHST11	0.390098	0	0	48.2668
ENSG00000302378	2.06222	0	0	48.2665
ENSG00000303100	3.36159	0	0	48.2305
TMEM163	0.444716	0	0	47.9507
HTR1A	2.38496	0	0	47.8591
TRIM67	0.609584	0	0	47.7
ADCY10P1	0.965344	0	0	47.6754
CARD10	2.22006	0	0	47.6348
ENSG00000284624	0.765768	0	0	47.5197
CLEC2L	1.29079	0	0	47.5124
COMMD2	1.15621	0	0	47.474
PCDH11Y	0.609791	0	0	47.4453
LINC00323	2.95585	0	0	47.3908
ADAMTS19-AS1	0.989629	0	0	47.3882
SHANK1	0.417174	0	0	47.3405
CLCN4	0.744497	0	0	47.2646
EFCAB13	0.99447	0	0	47.2335
ENOX1	0.298471	0	0	47.1677
MIR4300HG	1.0343	0	0	47.0402
JMJD1C	0.272944	0	0	47.0139
ATXN1	0.356295	0	0	47.0053
ENSG00000286536	1.60155	0	0	46.8643
DPP4	1.40718	0	0	46.8026
NGFR-AS1	2.31912	0	0	46.7626
MED13L	0.321765	0	0	46.7619
CLTCL1	0.643315	0	0	46.7034
ENSG00000283183	0.8214	0	0	46.6603
RAP2A	0.711678	0	0	46.3762
TUBA1B-AS1	0.616939	0	0	46.0462
SGIP1	0.372227	0	0	45.9855
ENSG00000284052	1.04568	0	0	45.819
ENSG00000308900	0.518786	0	0	45.723
SEMA6B	0.608456	0	0	45.7181
ENSG00000244757	1.66812	0	0	45.6958
GPR63	1.16518	0	0	45.6378
UNC79	0.339098	0	0	45.6279
ENSG00000233928	0.92991	0	0	45.4829
MFHAS1	0.480586	0	0	45.4516
ENSG00000288021	0.931484	0	0	45.4313
TNRC6C	0.354407	0	0	45.2885
B3GNT2	1.11722	0	0	45.285
NMT2	0.535288	0	0	45.2748
PALS2	0.432002	0	0	45.2666
MAPT	0.310033	0	0	44.8383
SHROOM3-AS1	1.03242	0	0	44.8203
LINC01277	0.851086	0	0	44.8179
WLS	0.666808	0	0	44.7177
HS3ST3B1	1.93949	0	0	44.6243
ENSG00000255240	0.707743	0	0	44.6031
FRRS1L	0.563944	0	0	44.5752
FAM184A	0.569049	0	0	44.4232
TTC39B	0.939781	0	0	44.3721
CDKL5	0.410091	0	0	44.3677
FXYD7	0.836946	0	0	44.2087
PEG3	0.573147	0	0	44.1634
DPYD	0.365485	0	0	44.0005
PIK3C2G	1.77325	0	0	43.9833
ENSG00000287097	0.946686	0	0	43.9603
ENSG00000301175	1.76629	0	0	43.8711
FBN3	0.379849	0	0	43.8019
BTD	0.627241	0	0	43.6468
CADM2	0.293322	0	0	43.5951
RNF125	1.72586	0	0	43.5788
ITGA3	0.740178	0	0	43.5277
CPVL	1.11659	0	0	43.4796
GDA	0.991896	0	0	43.4613
LINC01104	1.76674	0	0	43.3936
ANKRD45	0.894182	0	0	43.382
PRKCG	1.31991	0	0	43.3177
ENSG00000289754	1.30218	0	0	43.2735
PRKG1	0.430829	0	0	43.0855
KIAA1671	0.736042	0	0	42.8978
SCN3B	0.475668	0	0	42.897
CACNB2	0.434415	0	0	42.8113
IGSF9B	0.60421	0	0	42.6773
TMPRSS13	2.49636	0	0	42.6391
RHBDL3	0.783058	0	0	42.6173
ROPN1L	1.3728	0	0	42.5845
ENSG00000286041	2.34774	0	0	42.4206
ENSG00000262633	0.956921	0	0	42.3119
SHANK2	0.287463	0	0	42.1178
STARD5	2.02761	0	0	42.0493
ENSG00000289368	1.72876	0	0	41.9381
ENSG00000291041	0.66278	0	0	41.8737
NREP	0.406819	0	0	41.8706
CORO2A	0.894246	0	0	41.8119
CCDC144NL-1	1.20978	0	0	41.7653
GPRIN2	0.831187	0	0	41.7294
LINC01811	0.852786	0	0	41.6897
SLC8A2	0.521212	0	0	41.6333
RTN4RL1	0.434603	0	0	41.5597
DMTN	0.754163	0	0	41.5318
COL19A1	0.794222	0	0	41.499
LDAF1	1.39661	0	0	41.2413
PLPPR5	0.456247	0	0	41.2141
LINC02449	0.462415	0	0	41.187
ZFR2	0.581006	0	0	41.1535
SLC35F1	0.351624	0	0	41.1099
TSGA10	0.600293	0	0	40.7037
ARHGAP26	0.54385	0	0	40.6219
ENSG00000260978	0.616846	0	0	40.5533
AEBP2	0.423306	0	0	40.5125
ENSG00000291094	0.70934	0	0	40.5112
GRM2	1.46399	0	0	40.3928
CCSAP	0.736367	0	0	40.3511
LINC02327	0.872998	0	0	40.3138
ENSG00000286746	1.24029	0	0	40.2682
POU5F1B	1.67958	0	0	40.2245
ADAM19	0.529908	0	0	40.2136
RAPH1	0.413295	0	0	40.1173
ERC2	0.250261	0	0	39.9721
YWHAH-AS1	1.38828	0	0	39.922
CHSY3	0.409621	0	0	39.8696
ANKRD18A	0.925904	0	0	39.643
TTLL11	0.361458	0	0	39.6105
TSPOAP1	0.460148	0	0	39.6082
ENSG00000228944	1.17062	0	0	39.6076
ENSG00000254573	2.90442	0	0	39.5617
CNNM1	0.88681	0	0	39.5128
OTUD7A	0.371154	0	0	39.4497
DGKG	0.818779	0	0	39.4402
ENSG00000285708	0.75585	0	0	39.3947
SAMD12	0.48981	0	0	39.2726
ENSG00000287404	1.6004	0	0	39.2238
HCRTR1	1.4138	0	0	39.1871
ADAM23	0.369265	0	0	39.1385
GNG8	1.98108	0	0	39.0989
ENSG00000271725	2.26609	0	0	38.9894
ENSG00000287042	0.348986	0	0	38.9562
FGF10	2.08599	0	0	38.9163
COX10-DT	0.414988	0	0	38.9088
ENSG00000288700	0.526688	0	0	38.8952
KANK1	0.653723	0	0	38.8847
LYPD6B	0.782245	0	0	38.8757
RASGEF1A	0.922042	0	0	38.8384
ENSG00000298678	2.75063	0	0	38.7882
ENSG00000297716	1.90858	0	0	38.5825
SULT4A1	0.498957	0	0	38.53
PPP1R13B	0.471051	0	0	38.4688
ENPP7P4	0.789652	0	0	38.4007
CDH13	0.413397	0	0	38.2952
SH3D19	0.560842	0	0	38.1968
ENSG00000300568	2.73716	0	0	38.1819
B3GALT2	0.995237	0	0	38.1039
SYCP2L	0.611471	0	0	38.0475
PPARG	1.08326	0	0	38.0371
ENSG00000289731	1.23311	0	0	38.0099
ETV1	0.717054	0	0	38.0023
TCERG1L	0.688332	0	0	38.0023
PLK2	0.819988	0	0	37.9217
CAMK2B	0.404927	0	0	37.8988
GFOD1	0.382245	0	0	37.8894
LINC03022	0.483672	0	0	37.7841
PDC-AS1	0.565913	0	0	37.7225
COL13A1	1.14043	0	0	37.7128
PTPN5	0.470984	7.71978e-308	7.0758e-307	37.5544
RAPGEF5	0.537765	3.15143e-307	2.88394e-306	37.5171
CHST15	0.492938	4.77605e-307	4.36545e-306	37.506
KIFAP3	0.400397	1.74763e-306	1.59548e-305	37.4704
HDAC2-AS2	0.419869	1.28019e-301	1.15908e-300	37.1691
SLITRK1	0.849483	2.67741e-301	2.4203e-300	37.153
KCNK1	1.40219	1.04583e-300	9.43913e-300	37.1217
ENSG00000288656	0.832111	3.66152e-299	3.29308e-298	37.0196
ENSG00000309880	0.88329	3.36026e-296	2.99868e-295	36.8343
SEC24D	0.775895	3.20315e-294	2.85073e-293	36.7083
MAL2	1.15867	8.44982e-294	7.50852e-293	36.6861
CDC42BPA	0.266552	2.89991e-293	2.57289e-292	36.6449
ENSG00000287923	1.42754	1.01172e-292	8.95901e-292	36.6216
TSPOAP1-AS1	0.683839	2.17006e-291	1.91794e-290	36.5292
MEF2C-AS1	0.422297	4.16264e-291	3.67479e-290	36.5091
MID2	0.927898	5.10395e-291	4.50405e-290	36.5074
ZNF883	0.402814	1.25428e-290	1.10644e-289	36.4787
ANKRD36BP2-1	0.862976	1.81419e-289	1.59789e-288	36.4088
CA8	0.813692	1.83519e-289	1.61577e-288	36.408
RRAS2	0.507451	1.4517e-287	1.2718e-286	36.2846
ENSG00000294677	2.31724	5.71835e-285	4.98502e-284	36.1383
CYTH3	0.424793	4.69375e-284	4.08254e-283	36.0597
ENSG00000273025	1.04068	8.33661e-279	7.16967e-278	35.727
ENSG00000241324	1.97151	2.3093e-278	1.98234e-277	35.7087
CCDC146	0.402715	1.68747e-278	1.45018e-277	35.7017
ENSG00000297007	0.901493	2.6913e-278	2.30853e-277	35.6926
ENSG00000231876	2.53529	7.31116e-278	6.26434e-277	35.6821
FAM184B	0.580321	1.27113e-277	1.08791e-276	35.6457
MYOCD	2.13135	1.42971e-276	1.2191e-275	35.5934
EPHA8	1.39935	1.23803e-274	1.04982e-273	35.4601
SYT15-AS1	1.05	2.63427e-273	2.22558e-272	35.369
PARM1	1.18413	6.77873e-273	5.71656e-272	35.3431
ENSG00000308026	2.53637	3.12089e-271	2.62034e-270	35.249
FGF12	0.284906	1.6857e-271	1.41741e-270	35.2454
ATP2B3	0.663372	2.28675e-270	1.91719e-269	35.1732
MALRD1	0.762425	1.00495e-269	8.41618e-269	35.1315
HSF2BP	1.01581	5.48517e-268	4.55882e-267	35.019
SLC9C2	0.843388	8.03801e-268	6.6757e-267	35.0066
ISLR2	0.559407	2.56296e-266	2.12245e-265	34.9051
ARRB1	0.334983	1.56223e-265	1.29186e-264	34.8518
ENSG00000228509	1.51418	2.3188e-264	1.91131e-263	34.7838
IGF2BP2	0.257381	5.87032e-263	4.81454e-262	34.6804
MIPOL1	0.401614	7.97578e-261	6.4927e-260	34.5385
FAM151B	0.650767	1.11731e-260	9.09229e-260	34.5303
CPLX1	0.565051	1.40665e-260	1.14427e-259	34.5233
FKBP5	0.958323	2.28921e-258	1.85435e-257	34.3768
GPLD1	0.68512	5.28705e-258	4.2797e-257	34.3511
JPH4	0.401732	1.35335e-257	1.09395e-256	34.3219
PRKY	0.520446	1.90765e-257	1.54147e-256	34.3127
GUCY1A1	0.667671	4.76647e-257	3.84342e-256	34.287
ZBTB38	0.425264	3.4797e-256	2.80192e-255	34.2269
ENSG00000267053	0.502604	3.60176e-256	2.89918e-255	34.2264
ADGRB2	0.395561	1.40606e-255	1.12824e-254	34.1858
ENSG00000224016	1.57133	2.65333e-254	2.11797e-253	34.1086
MTURN	0.46414	8.02461e-254	6.39882e-253	34.0672
MPPED2-AS1	1.1055	3.45519e-253	2.75039e-252	34.0285
MAN2A1	0.437824	3.84664e-252	3.05249e-251	33.9529
ST7	0.282697	4.05155e-252	3.21399e-251	33.9507
RTTN	0.441237	5.32328e-252	4.21991e-251	33.9431
GABRG3-AS1	1.37948	2.36493e-250	1.86702e-249	33.8376
NCEH1	0.993217	3.84292e-250	3.03071e-249	33.8207
SPTAN1	0.231129	3.4037e-250	2.68525e-249	33.8194
ATP8A2	0.26562	1.18343e-249	9.3203e-249	33.7824
TSPAN2	0.538603	2.7889e-248	2.1882e-247	33.6897
ZNRF2	0.481725	1.7195e-247	1.34639e-246	33.6351
ENSG00000295981	0.647968	1.83977e-247	1.44007e-246	33.6342
PACS1	0.255234	5.68033e-247	4.43116e-246	33.5986
UBE2QL1	0.485021	3.6404e-245	2.82927e-244	33.4751
RUNDC3B	0.351352	4.41369e-245	3.42911e-244	33.4686
ENSG00000289201	0.902523	7.61083e-245	5.90706e-244	33.4554
GLRB	0.50617	1.27498e-244	9.88896e-244	33.4374
PCNX1	0.272592	1.92617e-244	1.49296e-243	33.4242
TSKU	0.946344	6.87868e-244	5.31907e-243	33.3899
ENSG00000285940	0.54757	1.4246e-243	1.09975e-242	33.3653
NFYA	0.635849	5.06615e-243	3.89783e-242	33.3275
ARL17A	0.477163	5.08702e-243	3.91258e-242	33.3266
CPEB3	0.322385	5.95121e-242	4.56809e-241	33.2518
ENSG00000297210	2.45717	1.11374e-241	8.54044e-241	33.2495
SLC22A15	0.601491	9.78638e-241	7.47202e-240	33.1685
ENSG00000257403	3.05091	2.59466e-240	1.97909e-239	33.1588
PLPPR4	0.331677	7.66769e-240	5.83887e-239	33.1049
JPH3	0.396442	4.60507e-238	3.48938e-237	32.9809
ENSG00000256654	1.67055	1.23162e-237	9.317e-237	32.9608
TPD52	0.6565	4.88987e-236	3.68576e-235	32.84
ABLIM2	0.362395	4.76245e-235	3.57215e-234	32.7689
ZFPM2-AS1	1.07667	7.60945e-235	5.70015e-234	32.7578
ENSG00000294532	2.28179	1.35438e-234	1.01356e-233	32.7503
TBC1D8	0.476672	1.55958e-234	1.16674e-233	32.7332
SFMBT1	0.414806	3.50852e-232	2.6078e-231	32.5663
RERGL	1.48307	2.35413e-231	1.74695e-230	32.5149
ENSG00000280011	1.20209	1.26457e-229	9.32992e-229	32.3896
MAP7	0.584127	8.34493e-229	6.14304e-228	32.3269
KCNIP3	0.607696	1.64144e-228	1.20524e-227	32.3059
SLC36A1	0.629536	3.02768e-228	2.21885e-227	32.2872
GRK5	0.327427	6.44541e-228	4.72055e-227	32.2622
ENSG00000254746	2.18617	2.56614e-227	1.87523e-226	32.2329
ENSG00000287645	1.49081	1.97575e-226	1.4406e-225	32.1624
AFDN-DT	0.576976	1.87063e-226	1.36438e-225	32.1584
ENSG00000298734	2.63595	1.36389e-225	9.92893e-225	32.1116
PELI1	0.472916	2.24463e-225	1.63302e-224	32.0803
CDKL2	0.682381	2.7599e-225	2.00662e-224	32.0751
LINC02607	1.32353	5.11095e-225	3.71246e-224	32.0599
NRXN2	0.254637	5.14729e-225	3.73768e-224	32.0537
KCNB2	0.244163	5.43847e-225	3.94787e-224	32.0519
IL34	1.5795	2.18782e-224	1.58467e-223	32.0168
PKP4	0.330275	1.80695e-223	1.30674e-222	31.9424
NEUROG2-AS1	0.510005	9.08595e-223	6.56661e-222	31.8924
MYO1D	0.277491	3.18865e-221	2.29513e-220	31.7794
GLIS1	1.06513	7.93733e-221	5.70957e-220	31.7547
LINC02763	0.987287	1.52746e-220	1.09772e-219	31.7335
ENSG00000293964	1.41896	1.89998e-220	1.36458e-219	31.7297
MAP3K8	1.1973	7.05167e-219	5.04095e-218	31.6132
C2orf80	0.839782	1.90483e-218	1.36042e-217	31.5797
KAZN-AS1	1.66078	2.21442e-217	1.57371e-216	31.5087
SRCIN1	0.270255	3.41175e-216	2.4149e-215	31.4119
ZNF382	0.451662	9.99918e-215	7.0386e-214	31.3045
CLSTN1	0.356139	1.65282e-214	1.1631e-213	31.2881
RFPL1S	0.412498	4.17099e-214	2.93155e-213	31.2587
ALG1L9P-1	0.591019	7.31979e-214	5.14151e-213	31.2414
FAM242A	0.900898	1.09953e-212	7.69505e-212	31.1561
ENSG00000230015	1.36072	7.07279e-212	4.93785e-211	31.0991
ENSG00000298616	1.71093	7.68768e-212	5.36551e-211	31.0987
MYLK	1.02531	1.98322e-210	1.37706e-209	30.9887
ENSG00000305253	2.51287	4.26294e-209	2.95019e-208	30.8996
CDH3	0.52768	5.43082e-209	3.75504e-208	30.8792
HOMER1	0.42864	1.38876e-207	9.53355e-207	30.7732
MIR497HG	0.36086	1.81429e-207	1.2451e-206	30.7643
SRPK1	0.333025	4.67417e-207	3.20298e-206	30.7334
PRDM8-AS1	0.67596	4.08445e-206	2.78972e-205	30.6639
CEP63	0.364184	8.84469e-206	6.03207e-205	30.6374
RASAL1	1.34099	1.31359e-205	8.95599e-205	30.63
CYP2E1	0.925671	1.70249e-205	1.15972e-204	30.6188
MORN3	0.822482	2.32025e-205	1.58006e-204	30.6079
CDH10	0.370083	8.11121e-204	5.4976e-203	30.4899
EIF4E3	0.573738	2.205e-203	1.49274e-202	30.457
LGALSL-DT	0.504412	4.66981e-203	3.15301e-202	30.4322
GRM1	0.441023	5.59761e-203	3.77613e-202	30.4258
LINC02813	1.53692	1.05651e-202	7.11881e-202	30.4113
PPP2R2C	0.337436	7.9278e-202	5.33086e-201	30.338
LINC01950	1.37431	1.05437e-201	7.07742e-201	30.3346
PRMT8	0.437108	9.83902e-202	6.61022e-201	30.3313
CYP26A1	3.09696	2.2397e-201	1.50165e-200	30.32
STK10	0.466128	8.43579e-201	5.64933e-200	30.2604
GLB1L2	1.09928	4.14521e-200	2.77276e-199	30.2106
PDXDC2P	0.512607	4.23296e-199	2.8216e-198	30.1305
ENSG00000261451	0.464152	5.71596e-199	3.80793e-198	30.1202
ENSG00000235978	0.651532	1.06963e-198	7.1155e-198	30.1002
BTNL9	1.32659	1.67154e-198	1.11067e-197	30.0886
TPPP	0.634303	1.95335e-198	1.29718e-197	30.0803
ENSG00000309428	0.509211	6.2694e-198	4.15977e-197	30.0408
KLHL3	0.502136	7.59772e-198	5.03965e-197	30.0342
RCVRN	2.03771	1.43045e-196	9.43659e-196	29.9454
FLNB	0.358222	3.04685e-196	2.00884e-195	29.9103
ENSG00000268460	1.04358	3.99941e-196	2.63613e-195	29.9045
ACTR3B	0.352655	4.51482e-196	2.97499e-195	29.8971
LINC02796	0.495954	9.06221e-196	5.96462e-195	29.8741
ENSG00000307120	0.632917	1.12562e-195	7.4023e-195	29.8677
BBOF1	0.660257	1.45765e-195	9.58306e-195	29.8589
ENSG00000297721	0.758874	3.55192e-195	2.33049e-194	29.8297
SLC1A1	0.350533	9.80875e-194	6.41376e-193	29.7162
GRK4	0.330851	1.23338e-193	8.06026e-193	29.7084
ENSG00000288765	0.802588	2.88486e-193	1.88314e-192	29.6816
ENSG00000291325	1.23664	1.28067e-192	8.34792e-192	29.6341
ENSG00000286872	0.531742	2.05795e-192	1.33994e-191	29.614
ANKRD36C	0.166011	1.94232e-190	1.26001e-189	29.4588
ENSG00000304770	0.857942	5.14325e-190	3.33087e-189	29.4279
LINC02964	0.960157	1.37098e-189	8.85629e-189	29.3952
VSTM2L	0.359086	3.31326e-189	2.13791e-188	29.3622
WDR17	0.324948	3.98015e-189	2.56607e-188	29.3561
CDYL2	0.590663	4.61558e-189	2.97407e-188	29.352
MROH7	0.967621	1.99068e-188	1.2784e-187	29.3034
ENSG00000285095	0.752085	3.44414e-188	2.20873e-187	29.284
FAUP4-1	0.483397	3.46532e-188	2.22169e-187	29.2827
NRXN1	0.141888	4.92456e-188	3.1546e-187	29.27
DACT3	0.75219	5.6422e-188	3.6133e-187	29.2672
SLITRK5	0.461347	5.12299e-186	3.26263e-185	29.1111
SLC1A6	0.679578	7.9415e-186	5.05482e-185	29.0969
SNX29P1	2.98245	2.00417e-185	1.27426e-184	29.0777
ARMH4	0.22854	5.36316e-185	3.40426e-184	29.0296
PACRG	0.37825	5.45463e-185	3.46137e-184	29.0292
PRKY-1	0.630274	1.0096e-184	6.40316e-184	29.0091
LINC00632	0.243211	1.34555e-184	8.53144e-184	28.9978
KCNK10	0.354805	1.45922e-184	9.2471e-184	28.9952
FAM13C	0.377828	6.9783e-184	4.40758e-183	28.9412
LINC01237	0.30773	7.82018e-184	4.93797e-183	28.9371
ENSG00000298052	0.775856	9.08817e-184	5.73547e-183	28.9336
ENSG00000309214	0.914547	2.67511e-183	1.685e-182	28.8971
ZNF594-DT	0.32192	2.02522e-182	1.27078e-181	28.8242
SPSB1	0.821417	2.32111e-182	1.45604e-181	28.8211
GRIP1	0.182241	3.8019e-181	2.37265e-180	28.7219
GRIK5	0.265944	4.03752e-181	2.51901e-180	28.7199
ENSG00000269693	0.648345	5.81291e-181	3.62373e-180	28.7084
ADAM11	0.565747	5.45072e-179	3.37507e-178	28.5493
PODXL2	0.300079	1.80569e-178	1.11657e-177	28.5063
ENSG00000281593	0.454863	1.03926e-177	6.40574e-177	28.4451
ENSG00000286721	0.775724	1.03096e-176	6.33083e-176	28.3654
DUSP9	2.01439	1.35822e-176	8.33379e-176	28.3624
PHACTR3	0.193947	4.35252e-176	2.66635e-175	28.3127
ENSG00000253693	0.474963	1.87336e-175	1.14427e-174	28.2618
RIPOR2	0.410228	1.87467e-175	1.14476e-174	28.2612
FOXO6	0.450862	2.90345e-175	1.77205e-174	28.2461
DISP2	0.484318	3.86777e-175	2.35746e-174	28.2361
SLC66A3	0.988079	1.65274e-174	1.00524e-173	28.1863
PNPLA7	0.407789	4.4148e-174	2.67952e-173	28.1493
ATXN7L1	0.229557	7.43695e-174	4.51141e-173	28.1303
ENSG00000286046	1.04837	1.23107e-173	7.45808e-173	28.1155
LRRC4	0.803681	1.36258e-173	8.25262e-173	28.1104
CCDC169	1.20964	2.73687e-172	1.65066e-171	28.0051
GALNT12	1.16195	2.99156e-172	1.80333e-171	28.0018
GNB4	0.466698	4.65771e-172	2.80695e-171	27.983
SEPTIN11	0.216766	2.62711e-170	1.57373e-169	27.8379
CPNE4	0.450574	4.23971e-170	2.5371e-169	27.8211
BAIAP2	0.413973	5.33011e-170	3.18711e-169	27.8129
ENSG00000272162	0.500835	3.12357e-169	1.86047e-168	27.7494
SPTB	0.466625	3.6225e-169	2.15708e-168	27.7439
NCKAP5-AS2	1.20168	4.5044e-169	2.68084e-168	27.7387
ZNF540	0.339073	7.46311e-168	4.41774e-167	27.6341
ENSG00000308298	1.02777	9.01804e-168	5.33268e-167	27.6292
MYO16	0.248663	1.44056e-167	8.51198e-167	27.6101
RGS7BP	0.416462	1.58195e-167	9.34503e-167	27.607
KRT222	1.73572	2.2078e-167	1.3032e-166	27.6008
MYO1E	0.430202	8.48682e-167	5.00696e-166	27.5459
FAM83B	2.17526	1.0675e-166	6.29306e-166	27.5452
UNC13B	0.311637	1.77423e-166	1.04513e-165	27.519
ENSG00000253260	2.97029	2.50533e-166	1.47466e-165	27.5182
ENSG00000228541	0.733626	4.67999e-165	2.74136e-164	27.401
NEUROD2	0.385634	4.64983e-165	2.72438e-164	27.4
SOHLH2	1.40841	7.20613e-165	4.21464e-164	27.3878
ENSG00000259543	0.299562	9.94456e-165	5.81329e-164	27.372
ENSG00000286291	3.24442	2.96956e-164	1.73151e-163	27.3444
CNTNAP3C	0.888726	4.0587e-164	2.36418e-163	27.3225
POLR2F	0.33226	5.6307e-164	3.27738e-163	27.3086
NGFR	1.84869	1.02765e-163	5.97847e-163	27.2926
SYT5	0.462572	5.04141e-163	2.92697e-162	27.2285
ENSG00000290098	0.501857	4.06224e-162	2.35076e-161	27.1517
PAPPA-AS1	1.7985	1.46407e-161	8.46175e-161	27.1099
FBXL2	0.238127	1.58436e-161	9.15467e-161	27.1008
ENSG00000293615	0.240864	1.6834e-161	9.7245e-161	27.0986
RTN1	0.218259	2.69004e-161	1.55278e-160	27.0812
C3orf70	0.379283	8.8566e-161	5.09825e-160	27.0373
ENSG00000306673	2.1117	4.2642e-160	2.4467e-159	26.9865
NPIPB14P	0.52653	3.74572e-160	2.15028e-159	26.9844
ENSG00000227745	0.642153	2.31919e-159	1.32904e-158	26.917
CBLN4	1.39595	3.73968e-159	2.142e-158	26.9025
SLC16A1-AS1	0.254057	5.28583e-159	3.02534e-158	26.8853
PLK5	0.858007	5.84384e-159	3.34389e-158	26.8835
CYFIP2	0.260141	6.41641e-159	3.66969e-158	26.8781
ENSG00000242593	0.600084	7.51863e-159	4.29901e-158	26.8731
ENSG00000288105	1.06132	1.01635e-158	5.80696e-158	26.8631
ENSG00000230647	1.58703	2.73627e-157	1.55488e-156	26.7428
SSPOP	1.06034	3.19394e-157	1.81406e-156	26.7346
SLC12A5	0.577118	5.6577e-157	3.20943e-156	26.7115
CSAD	0.319211	1.31089e-156	7.43076e-156	26.6794
SULT1A1	0.823699	1.40632e-156	7.96973e-156	26.6782
MTMR7	0.266224	1.47111e-156	8.33276e-156	26.6749
THRA	0.295664	2.02838e-156	1.14865e-155	26.6629
NGF-AS1	0.975915	6.86734e-156	3.87554e-155	26.6191
STAC2	1.5822	8.11127e-156	4.57642e-155	26.6156
OSBPL6	0.256645	1.51105e-155	8.51916e-155	26.5874
ENSG00000274422	0.245182	2.10859e-155	1.18706e-154	26.5747
SLC4A5	0.3768	2.17282e-155	1.22292e-154	26.5739
DPF1	0.390136	4.1124e-155	2.3123e-154	26.5499
NME9	0.697662	1.2781e-154	7.17588e-154	26.5079
ENSG00000303689	0.923532	3.13599e-154	1.75855e-153	26.4748
MKX	1.53758	1.97452e-153	1.10482e-152	26.4077
ENSG00000295678	1.25575	3.30935e-153	1.84946e-152	26.3867
FAM153A	1.44241	1.60607e-152	8.94086e-152	26.3277
TMEM229B	0.602264	2.08113e-152	1.15799e-151	26.3146
SLC26A8	0.834233	2.34917e-152	1.30587e-151	26.3108
DOCK10	0.437073	2.44711e-152	1.35998e-151	26.3076
SORL1	0.272235	3.39114e-152	1.88372e-151	26.2951
STX3	0.483289	7.19666e-152	3.99088e-151	26.267
IQCE	0.344951	8.46926e-152	4.69206e-151	26.2605
ENSG00000235077	1.18134	9.81908e-152	5.43857e-151	26.2576
SLC5A3	0.361172	7.15464e-149	3.92498e-148	26.0023
PIEZO2	0.651898	1.19753e-148	6.56173e-148	25.9835
TMEM150C	0.312742	1.17604e-148	6.44554e-148	25.9831
ENSG00000309745	0.393019	1.50851e-148	8.25591e-148	25.9737
CCDC148	0.39221	1.67681e-148	9.17478e-148	25.9696
OR1F1	1.06185	3.995e-148	2.18226e-147	25.9384
ENSG00000257545	0.328908	5.02911e-148	2.74518e-147	25.9271
PLXNA1	0.304038	7.45942e-148	4.06792e-147	25.9118
ENSG00000295651	3.00033	2.56373e-147	1.39414e-146	25.8735
WDR19	0.329424	3.55508e-147	1.93231e-146	25.8514
ENSG00000225387	1.55282	5.05721e-147	2.74488e-146	25.8422
NRG2	0.319539	4.69112e-147	2.54859e-146	25.8407
ENSG00000303412	1.49282	9.09477e-147	4.93401e-146	25.8188
LINC03000	0.374468	2.11205e-146	1.14392e-145	25.7824
TTC9B	0.854274	1.22655e-145	6.63071e-145	25.7155
ENSG00000250697	1.0982	1.78927e-145	9.67049e-145	25.7019
GALNT8	0.266963	4.53858e-145	2.44721e-144	25.6629
DIPK1A	0.321671	4.58511e-144	2.46421e-143	25.5726
ENSG00000283415	0.611131	1.03206e-143	5.5415e-143	25.5415
ZNF534	0.954425	1.71772e-143	9.21662e-143	25.5226
NAB1	0.388696	8.61874e-143	4.60514e-142	25.4576
ZMAT4	0.453035	1.28452e-142	6.86025e-142	25.442
ABHD6	0.348357	1.01709e-141	5.40309e-141	25.3604
RNF212	0.69841	2.702e-141	1.4334e-140	25.3226
SIK3	0.217589	3.81585e-141	2.02383e-140	25.3079
ENSG00000298470	1.72498	8.47849e-141	4.49262e-140	25.2813
LY6E-DT	0.608303	2.6676e-140	1.40994e-139	25.2318
HACD2	0.440339	2.18113e-139	1.1486e-138	25.1477
STIM2	0.32212	3.00434e-139	1.58066e-138	25.1348
SPINT2	0.649756	3.43073e-139	1.80376e-138	25.1303
KCNE1	1.02585	3.96741e-139	2.08498e-138	25.1257
ZIM2	0.711169	5.55614e-139	2.91789e-138	25.1112
LINC00960	0.819078	3.05553e-138	1.60137e-137	25.0435
ENSG00000285777	0.980647	7.5269e-138	3.94027e-137	25.0079
SNX10	0.461471	4.55168e-137	2.37573e-136	24.9345
ADAMTS6	0.408796	1.12894e-136	5.88311e-136	24.8976
TANGO6	0.307474	3.06575e-136	1.59401e-135	24.8574
EFCAB5	0.51773	7.13639e-136	3.70464e-135	24.8238
CCDST	0.35391	1.57026e-135	8.14415e-135	24.7917
LRATD2	1.3955	3.52226e-135	1.82272e-134	24.7618
ENSG00000290421	1.02653	4.18601e-135	2.16473e-134	24.7538
ETV5	0.491203	4.87363e-135	2.51862e-134	24.7461
STARD3	0.396631	5.00761e-135	2.58728e-134	24.7449
PPEF1	0.615186	5.97888e-135	3.08842e-134	24.7382
GPR12	0.94203	3.33537e-134	1.71865e-133	24.6693
SULT1A2	1.1148	1.22742e-133	6.30768e-133	24.6172
LINC01882	2.22511	1.40934e-133	7.24098e-133	24.6159
DDX25	0.602258	2.68988e-133	1.38048e-132	24.5837
ENSG00000278875	1.70444	3.0874e-133	1.58378e-132	24.5815
SLC9B2	0.357881	5.52058e-133	2.83133e-132	24.5539
ENSG00000293659	0.555698	7.23641e-133	3.70801e-132	24.5434
ARHGEF11	0.210503	7.41069e-133	3.79647e-132	24.5417
ZNF780B	0.228236	1.18073e-132	6.03943e-132	24.5228
ENSG00000287943	0.792831	3.16638e-132	1.61637e-131	24.4837
ARHGEF4	0.426466	4.1685e-132	2.12651e-131	24.4714
DPP10-AS1	0.978242	2.41513e-131	1.22688e-130	24.401
ENSG00000307843	1.48273	4.21364e-131	2.13815e-130	24.3799
ABCA17P	0.95754	8.28586e-131	4.19898e-130	24.3504
CYP4X1	0.784067	1.41111e-130	7.14472e-130	24.328
AHR	0.73019	1.41615e-130	7.16866e-130	24.3275
NPTX1	0.647581	2.18658e-130	1.10613e-129	24.3095
PRR15-DT	0.289313	4.89624e-130	2.47198e-129	24.2757
LINC02306	0.695749	5.26138e-130	2.65517e-129	24.2737
CMSS1	0.249423	5.50032e-130	2.77514e-129	24.2708
ENSG00000306221	0.897504	6.9775e-130	3.51967e-129	24.2624
ENSG00000261728	0.935247	1.18271e-129	5.96204e-129	24.2406
CD163L1	0.740729	1.97576e-129	9.94455e-129	24.2189
ENSG00000287558	0.7282	3.45547e-129	1.73733e-128	24.1959
PCDH10	0.391823	3.76146e-129	1.89035e-128	24.1917
FANCL	0.328853	4.63068e-129	2.32515e-128	24.1829
PRDM8	0.38379	7.09375e-129	3.56035e-128	24.1654
ZDHHC22	0.816514	9.10611e-129	4.56536e-128	24.1559
ENSG00000258871	1.26139	1.07497e-128	5.38349e-128	24.1504
C20orf203	0.493611	1.5643e-128	7.83069e-128	24.1329
SDK1	0.200362	2.0531e-128	1.02731e-127	24.1211
AQP4-AS1	0.555816	2.39298e-128	1.19659e-127	24.1153
VRK1	0.319879	7.50724e-128	3.7458e-127	24.0673
FADS3	0.486171	1.00999e-127	5.03615e-127	24.0554
ZNF350-AS1	0.339468	3.40369e-127	1.6906e-126	24.0045
BCAT1	0.41354	7.31042e-127	3.62401e-126	23.9727
LCIIAR	0.970258	1.63973e-126	8.11469e-126	23.9405
ENSG00000285080	0.469685	8.48609e-126	4.18069e-125	23.8703
KCNJ4	1.169	1.27756e-125	6.29124e-125	23.855
ENDOD1	0.829675	1.47791e-125	7.27627e-125	23.8478
ENSG00000259846	0.666435	4.51562e-125	2.21987e-124	23.8007
AGTPBP1	0.213061	9.40372e-125	4.61792e-124	23.7689
FMNL1-DT	0.711933	1.78755e-124	8.76137e-124	23.7429
PPP3CA	0.190428	1.85229e-124	9.07672e-124	23.7404
MAPK14	0.240207	3.26396e-124	1.59841e-123	23.7165
LINC02977	0.724857	4.1555e-124	2.03328e-123	23.7071
NRL	0.891095	6.35618e-124	3.1061e-123	23.6896
ENSG00000297632	1.94037	1.08559e-123	5.29938e-123	23.6702
NT5DC1	0.56481	2.83961e-123	1.38207e-122	23.6255
CABLES1	0.491358	3.6458e-123	1.77294e-122	23.6148
ENSG00000286728	1.28878	2.19748e-122	1.06502e-121	23.5409
NPM2	0.523215	2.35461e-121	1.13854e-120	23.4378
MFSD6	0.293719	2.60638e-121	1.25922e-120	23.433
ENSG00000237773	0.710433	2.82634e-121	1.36492e-120	23.4306
PKIG	0.353087	1.01672e-120	4.89975e-120	23.3749
LYPD5	0.758729	2.61715e-120	1.25834e-119	23.3352
LHFPL5	0.723137	2.63126e-120	1.26487e-119	23.3349
NTSR1	0.418941	2.65645e-120	1.2767e-119	23.3339
ENSG00000293563	0.740281	4.03431e-120	1.93689e-119	23.3167
RAB26	1.13579	4.17617e-120	2.00458e-119	23.3162
ENSG00000294180	2.26202	8.02009e-120	3.84326e-119	23.2915
PCDH1	0.439645	1.08423e-119	5.1892e-119	23.2737
FAM171A1	0.198792	1.16371e-119	5.56841e-119	23.2702
LINC02008	0.882434	3.00302e-119	1.43428e-118	23.2309
PLPPR1	0.175438	2.98587e-119	1.42638e-118	23.2297
FRY	0.201347	3.81445e-119	1.82031e-118	23.2191
ATXN8OS	1.17697	5.77744e-119	2.75422e-118	23.2033
ENSG00000264634	2.23133	6.94644e-119	3.31014e-118	23.1984
ENSG00000282022	0.56168	6.26471e-119	2.9859e-118	23.1984
PHF24	0.896664	8.67146e-119	4.12787e-118	23.1851
CDH2	0.18522	1.31118e-118	6.23903e-118	23.1659
RIPOR1	0.314363	1.55304e-118	7.38835e-118	23.1588
FCHO1	0.32094	1.83499e-118	8.72605e-118	23.1516
ENSG00000306181	0.865309	3.74505e-118	1.77981e-117	23.1217
ASPHD2	0.910663	4.37169e-118	2.0759e-117	23.1151
ENSG00000302795	2.24874	5.03295e-118	2.3894e-117	23.1129
LHFPL4	0.230388	1.68495e-117	7.9812e-117	23.0555
CCDC85A	0.279198	1.73045e-117	8.19504e-117	23.0544
ENSG00000287726	0.60912	1.78437e-117	8.44864e-117	23.0536
SLC4A8	0.254192	2.23097e-117	1.05567e-116	23.0433
CMAHP-1	0.800555	2.7742e-117	1.31218e-116	23.0345
ENSG00000308193	0.915198	2.85171e-117	1.34857e-116	23.0338
ENSG00000230074	0.443687	2.25887e-116	1.06602e-115	22.9429
TMEM74B	0.837209	2.31079e-116	1.0903e-115	22.9427
MORC4	0.453879	1.0343e-115	4.86517e-115	22.8764
SNED1	0.636793	2.01764e-115	9.47127e-115	22.8472
SIMC1	0.244553	3.52825e-115	1.65421e-114	22.8225
PRKAA2	0.36045	7.69784e-115	3.60178e-114	22.7884
LMTK3	0.276739	1.99437e-114	9.29936e-114	22.7465
GOLGA7B	0.373599	3.20419e-114	1.49315e-113	22.7258
TMEM241	0.303699	7.33865e-114	3.41288e-113	22.6892
ABCA3	0.23975	9.80035e-114	4.55495e-113	22.6764
LINC03056	2.2732	1.10823e-113	5.14662e-113	22.6757
GTDC1	0.202337	1.97231e-113	9.15196e-113	22.6454
ABR	0.181974	2.87624e-113	1.33196e-112	22.6288
GEMIN7-AS1	0.473596	3.90018e-113	1.80504e-112	22.6157
AHNAK2	0.467545	9.02799e-113	4.16733e-112	22.5786
CARMIL3	0.327512	1.05679e-112	4.87623e-112	22.5714
LINC02245	0.324028	1.59995e-112	7.37652e-112	22.553
ENSG00000280234	0.476513	2.50245e-112	1.15282e-111	22.5334
SAMD8	0.329611	3.45126e-112	1.58896e-111	22.5189
LINC01115	0.946039	3.92607e-112	1.80612e-111	22.5144
IGFL2	1.05855	6.91703e-112	3.17761e-111	22.4894
CHGA	0.554622	1.08648e-111	4.98322e-111	22.4682
ENSG00000287910	0.660917	2.33319e-111	1.06821e-110	22.4344
ENSG00000304855	1.50607	3.28051e-111	1.50013e-110	22.4211
CCDC157	0.670988	3.96419e-111	1.81133e-110	22.4107
ZNF273	0.4572	7.74008e-111	3.53242e-110	22.3805
ALCAM	0.283421	1.13092e-110	5.15516e-110	22.3634
ENSG00000248242	0.858246	1.16699e-110	5.31854e-110	22.3632
RCBTB1	0.505931	2.08033e-110	9.4548e-110	22.3363
LINC01837	1.23351	2.49398e-110	1.13303e-109	22.3298
TM6SF1	0.738756	6.24184e-110	2.83068e-109	22.2875
PSD	0.312925	6.81878e-110	3.0911e-109	22.2829
ANKRD36BP2	0.700546	8.82819e-110	3.99964e-109	22.2719
EXTL1	1.21224	1.20932e-109	5.47349e-109	22.259
LINC01765	0.832173	3.38334e-109	1.52622e-108	22.2117
PLCL1	0.19312	4.33523e-109	1.95485e-108	22.1996
AUTS2	0.0763806	4.37197e-109	1.97103e-108	22.1994
GABPB2	0.321386	5.82909e-109	2.62692e-108	22.1864
LINC01194	1.39474	6.29143e-109	2.83416e-108	22.1853
ATP6V1C2	1.34099	8.0795e-109	3.63752e-108	22.1737
PIK3CB	0.272875	8.43116e-109	3.79509e-108	22.1697
ANKMY2	0.37042	1.83776e-108	8.25609e-108	22.1347
PTGFRN	0.319697	7.81603e-108	3.49903e-107	22.0691
SP140	0.693899	8.98014e-108	4.01704e-107	22.0634
POSTN	1.33091	1.13299e-107	5.06126e-107	22.0541
ZNF667	0.352418	1.16846e-107	5.2187e-107	22.0509
ADAP1	0.479584	1.32761e-107	5.9272e-107	22.0454
ENSG00000297852	1.85555	2.15286e-107	9.59483e-107	22.0267
DIRAS2	0.648415	3.19447e-107	1.4226e-106	22.0057
EEIG2	0.311472	3.8362e-107	1.70707e-106	21.9969
ENSG00000287226	0.975207	4.49055e-107	1.99747e-106	21.9909
CAV1	1.16863	5.46089e-107	2.42815e-106	21.9823
ENSG00000298633	1.77311	6.33094e-107	2.81339e-106	21.9772
VASH2	0.279217	6.95487e-107	3.09005e-106	21.9698
GLT1D1	0.377226	1.08836e-106	4.83093e-106	21.9496
STX7	0.260135	1.65768e-106	7.34807e-106	21.9302
ENSG00000258526	0.195133	2.05062e-106	9.08109e-106	21.9205
FSIP1	0.42974	3.01069e-106	1.33276e-105	21.9032
ZNF783	0.367379	4.19751e-106	1.85742e-105	21.888
ENSG00000294697	0.818224	5.46481e-106	2.41635e-105	21.8765
ENSG00000256029	0.67204	1.24308e-105	5.48804e-105	21.8388
TOX-DT	1.24417	2.92519e-105	1.28748e-104	21.8007
ENSG00000289601	1.18663	2.99688e-105	1.31852e-104	21.7994
PDS5B	0.184186	3.16877e-105	1.39388e-104	21.7953
MAPT-AS1	0.333994	4.77098e-105	2.09466e-104	21.7767
SLC37A1	0.284776	5.19286e-105	2.27945e-104	21.7727
ZNRF1	0.193195	6.82135e-105	2.99314e-104	21.7601
UPF3A	0.193813	1.49807e-104	6.56712e-104	21.7239
CCDC65	0.589208	1.64725e-104	7.21421e-104	21.7201
ENSG00000305400	1.07463	5.4872e-104	2.3963e-103	21.6655
SLC6A6	0.278482	3.34972e-103	1.45593e-102	21.5805
JAKMIP1	0.226228	1.0045e-102	4.35284e-102	21.5296
PCDH19	0.330884	1.36167e-102	5.89724e-102	21.5156
MTUS1	0.355062	1.50388e-102	6.51192e-102	21.5109
ANKRD62	2.32296	1.79368e-102	7.76092e-102	21.507
BAIAP2-DT	0.62965	1.81577e-102	7.85503e-102	21.5026
ENSG00000286333	1.11782	2.04025e-102	8.82446e-102	21.4979
SMYD3	0.159873	2.29486e-102	9.92196e-102	21.4911
RAD9A	0.222063	3.13128e-102	1.35256e-101	21.4767
DACT1	0.414459	3.78927e-102	1.63647e-101	21.468
FOSL2	1.03651	4.36495e-102	1.88402e-101	21.4623
PTK7	0.302771	5.26043e-102	2.26968e-101	21.4526
KBTBD11	0.376052	5.6366e-102	2.43062e-101	21.4495
FABP12	1.12622	6.01775e-102	2.59303e-101	21.4477
ICA1	0.341054	6.8517e-102	2.95127e-101	21.4404
BCL7A	0.26135	7.94347e-102	3.41962e-101	21.4334
TTC21A	0.451245	1.07074e-101	4.60602e-101	21.4196
PTBP3	0.276965	1.26097e-101	5.41929e-101	21.4118
GABRB2	0.290394	1.4158e-101	6.08015e-101	21.4065
PDXDC2P-NPIPB14P	0.384667	1.45099e-101	6.23009e-101	21.4054
RORB	0.260214	1.47716e-101	6.34127e-101	21.4045
SLC14A2-AS1	0.855903	1.86478e-101	8.00082e-101	21.3944
SHISA2	1.21191	3.31159e-101	1.41951e-100	21.3682
RETREG1	0.227174	3.41446e-101	1.46306e-100	21.3652
ENSG00000283529	1.69507	8.79834e-101	3.76158e-100	21.3236
SYP	0.229835	1.60699e-100	6.85895e-100	21.2927
ENSG00000285600	1.0892	5.7851e-100	2.46416e-99	21.2338
STX6	0.263489	1.13374e-99	4.82021e-99	21.2008
NEMP2-DT	0.31307	2.58665e-99	1.09812e-98	21.1619
ZDHHC11	0.4201	6.49948e-99	2.75112e-98	21.1185
CCDC40	0.333764	8.31052e-99	3.51447e-98	21.1067
HOOK1	0.563549	1.34657e-98	5.68933e-98	21.0842
DYNC2LI1	0.39864	1.70868e-98	7.21132e-98	21.0726
NHLH2	1.85116	2.2558e-98	9.51166e-98	21.0623
B3GNTL1	0.382835	4.14686e-98	1.74598e-97	21.0305
ENSG00000295329	0.457971	6.75283e-98	2.83955e-97	21.0075
ENSG00000229962	0.403032	6.93164e-98	2.9142e-97	21.0061
PXYLP1	0.306455	8.83234e-98	3.70787e-97	20.9945
ADRB1	2.08192	2.4037e-97	1.00744e-96	20.9501
ENSG00000236358	0.886562	8.72939e-97	3.64734e-96	20.8859
HIP1R	0.240798	8.61685e-97	3.60098e-96	20.8857
KCNG2	0.814579	9.50513e-97	3.97075e-96	20.8817
HECW1	0.14663	1.57625e-96	6.57757e-96	20.8568
FER1L6-AS2	1.14442	1.8287e-96	7.62689e-96	20.8511
SLC2A3	0.306163	2.71632e-96	1.13104e-95	20.8307
SCUBE3	0.452544	3.16919e-96	1.31913e-95	20.8235
ENSG00000260949	0.564991	7.32634e-96	3.04507e-95	20.7835
ENSG00000301499	1.08846	8.70889e-96	3.6184e-95	20.7759
JADE2	0.596529	1.10321e-95	4.58034e-95	20.7638
ENSG00000290880	0.550932	1.2887e-95	5.34855e-95	20.7562
ENSG00000302347	1.22203	1.57954e-95	6.55209e-95	20.7475
THSD7A	0.210195	1.67117e-95	6.92965e-95	20.7434
ENSG00000286922	1.112	2.76083e-95	1.14233e-94	20.7204
SAMD12-AS1	0.908784	4.31069e-95	1.78168e-94	20.6987
ENSG00000299051	0.71089	6.46516e-95	2.66785e-94	20.6788
PRKCZ	0.225921	7.10338e-95	2.92964e-94	20.6735
UBA6-DT	0.179326	7.85876e-95	3.24001e-94	20.6686
KCNH3	0.671054	8.87707e-95	3.65853e-94	20.6633
ENSG00000226465	0.334747	1.26579e-94	5.20832e-94	20.6457
ENSG00000285873	1.17004	1.33213e-94	5.48032e-94	20.6445
PPP2R2B	0.142913	1.9021e-94	7.81815e-94	20.6259
RAB11FIP4	0.215308	2.50255e-94	1.02825e-93	20.6126
CPNE6	1.18727	2.99924e-94	1.23189e-93	20.6052
FAM106A	0.317478	2.99514e-94	1.23043e-93	20.6039
OSTN	1.45135	3.17197e-94	1.30261e-93	20.6031
PTPRJ	0.198707	3.51002e-94	1.44091e-93	20.5961
MBOAT2	0.162754	4.01464e-94	1.64748e-93	20.5896
MAP3K9	0.288387	5.41283e-94	2.21848e-93	20.5752
CABYR	0.525297	8.39617e-94	3.43754e-93	20.5541
NSMAF	0.241693	1.81849e-93	7.43199e-93	20.5162
PRB2	0.628123	2.45992e-93	1.0041e-92	20.502
SCG5	0.288904	1.94264e-92	7.88751e-92	20.4006
ENSG00000234859	1.84124	5.23212e-92	2.11836e-91	20.3546
CPEB4	0.234934	5.39478e-92	2.18345e-91	20.3504
ABCA17P-1	0.991984	7.4664e-92	3.02031e-91	20.3354
NDFIP1	0.242044	1.09794e-91	4.43513e-91	20.3155
CFAP91	0.44378	1.34666e-91	5.43795e-91	20.3056
FAM227A	0.312418	1.78683e-91	7.20782e-91	20.2916
ENSG00000306522	1.96607	2.34823e-91	9.4691e-91	20.2809
GOLGA8B	0.26718	3.60419e-91	1.45158e-90	20.257
ADAMTS8	1.01415	4.15632e-90	1.6626e-89	20.1371
ZNF341	0.443509	8.7638e-90	3.49837e-89	20.0992
PRNCR1	1.80333	1.40242e-89	5.5924e-89	20.078
HPCA	1.04931	4.05106e-89	1.6093e-88	20.0239
TCF20	0.161343	4.73644e-89	1.88092e-88	20.0149
ENSG00000300357	1.90291	6.10104e-89	2.42157e-88	20.0048
ABRACL	0.446928	8.35334e-89	3.31324e-88	19.9868
SLC26A4-AS1	1.14799	1.03842e-88	4.11377e-88	19.977
GABRA1	0.639507	2.98529e-88	1.1798e-87	19.9232
ENSG00000286712	2.0554	3.58345e-88	1.41474e-87	19.9167
SLC16A7	0.248668	3.81367e-88	1.50511e-87	19.9106
ENSG00000288545	0.730272	6.28069e-88	2.47535e-87	19.8861
NSF	0.338982	7.0921e-88	2.79371e-87	19.8795
ARG1	1.20556	8.7298e-88	3.43707e-87	19.8702
POLR3G	0.600656	1.28135e-87	5.03798e-87	19.85
A1BG-AS1	0.593219	2.0637e-87	8.10293e-87	19.826
ENSG00000253420	1.66589	2.59993e-87	1.01945e-86	19.8158
SLC4A9	1.13344	2.59261e-87	1.01675e-86	19.8154
SH3BP5	0.246369	2.61847e-87	1.02654e-86	19.8137
MRAP2	0.751755	6.97101e-87	2.72779e-86	19.7648
SLC7A14	0.521024	8.44128e-87	3.30087e-86	19.7548
ENSG00000295376	1.52327	1.2043e-86	4.70287e-86	19.7386
TENM2	0.173206	3.04434e-86	1.18602e-85	19.6896
GALNT10	0.270051	4.14046e-86	1.61195e-85	19.674
ULK3	0.420194	1.05489e-85	4.09854e-85	19.6266
ENSG00000296830	0.583372	1.33633e-85	5.18502e-85	19.6148
TET2-AS1	0.429647	1.38306e-85	5.3654e-85	19.6129
CCDC144BP	0.250145	2.76387e-85	1.06932e-84	19.5774
LSM11	0.502335	8.36578e-85	3.2269e-84	19.521
TMEM266	0.423774	1.15621e-84	4.45384e-84	19.5044
CRAT37	0.941895	1.43409e-84	5.51869e-84	19.4941
ENSG00000249209	0.419206	1.44004e-84	5.54066e-84	19.4931
CEP126	0.249612	2.39984e-84	9.22742e-84	19.4668
DNAH6	0.322494	3.32099e-84	1.27565e-83	19.4501
RABGAP1L	0.141392	3.77691e-84	1.45004e-83	19.4435
ENSG00000287254	0.960684	1.84537e-83	7.04948e-83	19.3627
ENSG00000297359	1.32546	2.02201e-83	7.71914e-83	19.3585
ENSG00000302290	1.04942	2.11522e-83	8.07363e-83	19.3555
N4BP3	0.886367	3.27288e-83	1.24882e-82	19.333
FOXG1	0.197097	3.46486e-83	1.32164e-82	19.3293
LMTK2	0.224174	3.63884e-83	1.38754e-82	19.3268
CPB2-AS1	0.366638	3.74832e-83	1.42905e-82	19.3254
LNX2	0.476504	6.15536e-83	2.34401e-82	19.2998
PIGN	0.251497	8.72631e-83	3.31865e-82	19.2816
KCNC1	0.269063	1.51908e-82	5.77043e-82	19.2529
ATG16L1	0.257986	3.06815e-82	1.16356e-81	19.2163
CBS	0.899916	3.19202e-82	1.21014e-81	19.215
SRGAP1	0.131797	5.01582e-82	1.89875e-81	19.1907
FAM117B	0.174509	5.13386e-82	1.94311e-81	19.1895
LINC01289	1.35816	9.13058e-82	3.45242e-81	19.1609
SOCS6	0.43678	5.58409e-81	2.10245e-80	19.065
VILL	0.446855	6.49075e-81	2.44261e-80	19.0572
KIAA0513	0.249969	7.5281e-81	2.83159e-80	19.0493
KCNJ12	1.26035	9.16709e-81	3.4447e-80	19.0403
CALY	0.481217	1.17128e-80	4.39768e-80	19.0263
MIR4500HG	0.314771	1.17917e-80	4.42661e-80	19.0258
LRRC49	0.180536	1.20496e-80	4.52268e-80	19.0246
ENSG00000286198	1.11839	1.33574e-80	5.01192e-80	19.0201
PRR5-ARHGAP8	0.473434	1.44541e-80	5.42251e-80	19.0153
LRRC8D	0.200053	2.68177e-80	1.00346e-79	18.9826
ENSG00000277701	0.283919	7.2572e-80	2.70931e-79	18.9302
MGAT4C	0.183825	9.72889e-80	3.62736e-79	18.9147
CXADR	0.269398	1.02666e-79	3.82599e-79	18.9118
ADARB1	0.210878	1.08577e-79	4.04559e-79	18.9089
CRLF1	0.591974	1.12565e-79	4.1935e-79	18.9073
ASTN2-AS1	1.2247	1.19563e-79	4.45351e-79	18.9049
GP6	0.647628	1.20247e-79	4.47826e-79	18.9039
ENSG00000295786	0.479048	1.24185e-79	4.62418e-79	18.9019
ENSG00000301347	1.29546	1.9248e-79	7.15675e-79	18.8798
ENSG00000268218	0.974597	5.95655e-79	2.20726e-78	18.8196
SLC38A1	0.157109	1.19991e-78	4.4414e-78	18.7815
ENSG00000255087	1.33458	1.33625e-78	4.94206e-78	18.7772
CLSTN2-AS1	0.890915	1.70589e-78	6.30611e-78	18.7634
IRAK2	0.618542	4.2303e-78	1.5618e-77	18.7148
ENSG00000285637	1.23492	7.84957e-78	2.89336e-77	18.6825
ENSG00000286282	0.868446	7.96335e-78	2.93483e-77	18.6813
PRR5	0.281419	2.09617e-77	7.70549e-77	18.6289
ENSG00000293550	0.79847	2.48045e-77	9.11082e-77	18.6204
KIAA2012	0.621566	2.52926e-77	9.28863e-77	18.619
SEMA4G	0.349679	2.70622e-77	9.93374e-77	18.6153
KCNMB4	0.232648	3.14643e-77	1.15441e-76	18.6071
ENSG00000290450	0.493338	4.95457e-77	1.81549e-76	18.5829
TRIM36	0.206125	7.538e-77	2.75905e-76	18.5602
ENSG00000307959	1.29799	8.96792e-77	3.28034e-76	18.5519
MAP4K3-DT	0.332158	1.40534e-76	5.13482e-76	18.5267
ADAMTS19	0.459386	1.4581e-76	5.3259e-76	18.5248
ENSG00000306926	0.939926	1.97518e-76	7.21004e-76	18.5089
PUS7L	0.252302	3.31168e-76	1.20772e-75	18.4804
ENSG00000296683	1.6414	5.50065e-76	2.00251e-75	18.4544
LRRC27	0.2798	7.3224e-76	2.66234e-75	18.4375
ENSG00000273108	0.709439	8.14966e-76	2.96032e-75	18.4321
ENSG00000288838	0.376257	8.13351e-76	2.95492e-75	18.4319
ENSG00000291283	0.235308	3.97749e-75	1.43889e-74	18.3456
ENSG00000268536	1.3309	4.62698e-75	1.67306e-74	18.3386
SHISA7	0.316215	1.47054e-74	5.30396e-74	18.2744
ENSG00000304371	1.51977	2.59954e-74	9.3599e-74	18.2446
ENSG00000308280	0.563873	2.63595e-74	9.4895e-74	18.2426
TRIM14	0.54866	6.37962e-74	2.29059e-73	18.1942
ENSG00000288081	0.774541	8.13982e-74	2.91985e-73	18.1811
GMDS	0.175054	9.2902e-74	3.32887e-73	18.1733
LINC00397	1.42718	1.30419e-73	4.66662e-73	18.156
ACTR3-AS1	0.4695	1.46786e-73	5.24902e-73	18.1484
NCOA7	0.300804	1.85232e-73	6.62075e-73	18.1354
LINC02160	1.8129	4.31984e-73	1.53949e-72	18.0905
ENSG00000234427	1.92554	4.71491e-73	1.67924e-72	18.0858
ENSG00000285280	0.400084	6.72793e-73	2.39249e-72	18.0644
PTDSS1	0.329903	6.74205e-73	2.39714e-72	18.0642
ENSG00000295969	1.29923	2.93987e-72	1.03885e-71	17.9837
ST3GAL5	0.373655	5.4915e-72	1.93604e-71	17.948
PIGZ	0.466661	9.68107e-72	3.40838e-71	17.9165
TACR1	0.59526	1.17248e-71	4.12538e-71	17.9058
ADGRB1	0.207585	1.33791e-71	4.70601e-71	17.8983
CHRNA7	0.359188	2.26284e-71	7.94966e-71	17.869
SLC6A15	0.30911	2.80173e-71	9.83836e-71	17.8571
SLC7A6	0.295956	3.8894e-71	1.36452e-70	17.8387
MROH2A	1.75143	5.63247e-71	1.97304e-70	17.8197
FGF10-AS1	1.75527	7.69711e-71	2.6934e-70	17.8021
TRPC7	0.434042	1.16612e-70	4.07682e-70	17.7773
VLDLR	0.293853	1.21053e-70	4.23014e-70	17.7751
ENSG00000295056	0.617629	1.264e-70	4.41631e-70	17.7729
NOVA1	0.172906	1.33515e-70	4.66349e-70	17.7695
PRDM2	0.166624	1.36523e-70	4.76784e-70	17.7683
TSBP1-AS1	0.153399	1.9489e-70	6.7969e-70	17.7483
ENSG00000287940	1.27354	3.95311e-70	1.37555e-69	17.7095
DENND2C	0.66987	5.72572e-70	1.99115e-69	17.6878
ENSG00000286340	0.447035	7.40317e-70	2.57371e-69	17.6732
NFE2L3	0.585938	2.51681e-69	8.71147e-69	17.6041
CPE	0.156733	3.56391e-69	1.23228e-68	17.5841
CES3	1.28936	3.92593e-69	1.35685e-68	17.5797
HYDIN2	0.165403	6.13455e-69	2.11667e-68	17.5532
ENSG00000287077	0.598468	1.66666e-68	5.73776e-68	17.4966
LYST	0.189079	1.68147e-68	5.78702e-68	17.4958
ZNF483	0.365464	2.22736e-68	7.65775e-68	17.4799
PIK3C2B	0.179994	2.42843e-68	8.34402e-68	17.4749
RABGEF1	0.138569	2.55528e-68	8.77597e-68	17.4719
ZFP69B	0.306946	5.2578e-68	1.80306e-67	17.4308
ENSG00000306279	1.52189	6.09876e-68	2.09052e-67	17.4234
KDSR-DT	0.670281	9.24464e-68	3.16603e-67	17.3986
ENSG00000258084	0.861558	1.237e-67	4.23259e-67	17.3821
ENSG00000237720	0.753081	1.3474e-67	4.60692e-67	17.3772
ABLIM1	0.168419	1.38928e-67	4.74869e-67	17.375
IFTAP	0.267333	1.86606e-67	6.37555e-67	17.3581
ENSG00000300780	0.761974	1.92643e-67	6.58081e-67	17.3566
TNS3	0.281182	2.07693e-67	7.09179e-67	17.3519
ENSG00000297322	0.597464	3.52923e-67	1.20275e-66	17.3216
FOCAD	0.16878	3.65603e-67	1.24578e-66	17.3193
NPHS1	0.769779	4.37654e-67	1.49085e-66	17.3094
ENSG00000297808	1.35504	4.93753e-67	1.6812e-66	17.3031
ZNF208	0.608936	5.29298e-67	1.8017e-66	17.2983
SSTR2	0.355602	7.97585e-67	2.71292e-66	17.2744
ZDHHC14	0.183285	8.48214e-67	2.88385e-66	17.2708
CDC40	0.301402	9.02269e-67	3.06673e-66	17.2673
CCND2-AS1	0.49177	1.59913e-66	5.42247e-66	17.2343
ENSG00000299133	1.02269	2.05578e-66	6.96577e-66	17.2203
IGFBP3	1.25822	2.33005e-66	7.88581e-66	17.2131
MAMDC2	0.50327	2.58974e-66	8.76341e-66	17.2063
IGF2BP1	0.277401	4.27232e-66	1.4438e-65	17.1771
ENSG00000297930	0.47506	6.13879e-66	2.07061e-65	17.1562
GPR132	1.15556	6.53097e-66	2.20256e-65	17.1533
CFAP100	0.445603	6.83527e-66	2.30451e-65	17.1499
FABP3	0.889449	8.63059e-66	2.90682e-65	17.1368
PWAR1	0.601742	1.31548e-65	4.42411e-65	17.1119
ASAH1-AS1	0.994138	1.32455e-65	4.45397e-65	17.1119
ENSG00000298947	0.91901	1.89626e-65	6.37083e-65	17.0909
ENSG00000249328	0.609164	2.63842e-65	8.85132e-65	17.0713
ENSG00000290546	0.365759	2.66469e-65	8.93815e-65	17.0706
SLIT3-AS1	1.97804	3.34443e-65	1.121e-64	17.0588
ENSG00000287093	1.36478	3.59265e-65	1.20368e-64	17.054
PCLO	0.129976	3.86983e-65	1.29616e-64	17.0486
HIVEP1	0.186701	6.09353e-65	2.03741e-64	17.0221
ENSG00000294396	1.37435	8.41097e-65	2.80981e-64	17.0043
LRRTM2	0.357132	1.14645e-64	3.82542e-64	16.985
PELI2	0.146556	1.2548e-64	4.18636e-64	16.9796
LRRC7	0.0950817	1.35911e-64	4.53111e-64	16.9754
ENSG00000304226	0.547802	1.52484e-64	5.0814e-64	16.9684
CCDC102B	0.346098	1.6133e-64	5.37463e-64	16.9649
LNCRNA-IUR	0.735304	1.62421e-64	5.41021e-64	16.9648
AP5B1	0.572844	1.71923e-64	5.72586e-64	16.9614
ENSG00000262267	1.04291	2.24775e-64	7.47635e-64	16.946
FBXO16	0.229724	2.37251e-64	7.89019e-64	16.9422
SYT14	0.145529	2.42361e-64	8.05895e-64	16.9409
ENSG00000295930	1.00238	4.80115e-64	1.59371e-63	16.9012
LINC01695	0.918545	5.15329e-64	1.71035e-63	16.897
ENSG00000288075	0.209872	6.82101e-64	2.26125e-63	16.8799
ENSG00000288041	0.456875	1.30428e-63	4.31514e-63	16.8417
TPK1	0.333097	1.32249e-63	4.37475e-63	16.8408
PPIL6	0.3809	2.0962e-63	6.93117e-63	16.8135
ENSG00000300424	1.13008	2.60616e-63	8.61243e-63	16.8012
TENM3	0.183552	5.63118e-63	1.8569e-62	16.7547
DIRAS3	1.1157	7.1327e-63	2.35068e-62	16.7413
TBC1D31	0.300976	7.67604e-63	2.52794e-62	16.7363
ENSG00000285117	0.433417	9.31953e-63	3.06699e-62	16.7248
ENSG00000285820	1.14192	1.16042e-62	3.8145e-62	16.7122
IFT140	0.199153	1.19059e-62	3.91309e-62	16.7101
ENSG00000294947	1.41299	1.74977e-62	5.74195e-62	16.688
ENSG00000302815	1.65154	1.93874e-62	6.35934e-62	16.6821
WDR97	0.597372	2.80112e-62	9.17234e-62	16.6592
DPY19L2P3	0.462989	3.54772e-62	1.16055e-61	16.6449
SLC18B1	0.554642	3.89429e-62	1.27338e-61	16.6393
SNHG31	0.468741	5.45011e-62	1.78034e-61	16.6191
MANBA	0.236229	8.46585e-62	2.76194e-61	16.5926
SLC17A8	1.14196	1.34644e-61	4.38647e-61	16.5653
SYNPR	0.37763	1.42694e-61	4.6474e-61	16.5612
LINC00158	0.561251	1.58249e-61	5.15255e-61	16.5551
CES5A	0.870199	1.74241e-61	5.66924e-61	16.5496
TMEM232	0.230039	1.76419e-61	5.73929e-61	16.5484
ENSG00000284461	0.160798	1.8371e-61	5.97394e-61	16.5459
CFAP53	0.650999	3.29242e-61	1.06868e-60	16.511
ARL3	0.248429	3.41399e-61	1.10798e-60	16.5085
PEX5L-AS2	1.6442	7.03161e-61	2.27819e-60	16.4659
TMEM106B	0.320182	7.50669e-61	2.43109e-60	16.4609
ENSG00000305635	0.563647	7.78059e-61	2.51908e-60	16.4589
TPTE2P1	0.545266	1.11132e-60	3.59452e-60	16.4372
BICDL1	0.201747	1.1304e-60	3.65571e-60	16.436
DCAF4	0.441941	1.41472e-60	4.57392e-60	16.4225
RAB15	0.303185	1.43147e-60	4.62744e-60	16.4217
AATK	0.234419	1.43899e-60	4.65108e-60	16.4214
L1CAM	0.180185	1.44531e-60	4.67084e-60	16.4211
ENSG00000304131	0.922474	1.47537e-60	4.76734e-60	16.4204
IGSF21-AS1	1.38551	1.64072e-60	5.30014e-60	16.4143
ENSG00000289034	1.0991	1.74343e-60	5.63114e-60	16.4104
FBXO15	0.532435	2.87937e-60	9.28317e-60	16.3794
DOP1B	0.146534	2.97581e-60	9.59007e-60	16.3772
ENSG00000286674	0.938772	3.24531e-60	1.04571e-59	16.3724
LINC01600	0.351901	3.4191e-60	1.10125e-59	16.3688
ENSG00000234481	1.61375	4.39451e-60	1.41343e-59	16.3546
ENSG00000285681	1.04096	5.13669e-60	1.65145e-59	16.3445
IMPA1P1	1.2164	5.27716e-60	1.69638e-59	16.343
ENSG00000294970	1.10075	6.19022e-60	1.98794e-59	16.3331
ENSG00000301643	0.451968	8.3631e-60	2.6835e-59	16.3143
ENSG00000291062	0.293825	1.07824e-59	3.45594e-59	16.2987
CAPN14	0.452735	1.15774e-59	3.70815e-59	16.2944
SEMA3F-AS1	0.656752	1.96032e-59	6.2709e-59	16.2623
ENSG00000306801	1.66468	3.07937e-59	9.83424e-59	16.2352
FGF17	0.541578	4.19581e-59	1.33922e-58	16.2155
ENSG00000255139	0.678015	6.19902e-59	1.97696e-58	16.1915
ARMC2	0.189688	6.97332e-59	2.22359e-58	16.184
LINC01410	0.376848	7.78754e-59	2.48248e-58	16.1772
PPM1H	0.308493	8.40789e-59	2.67732e-58	16.1725
SCN3A	0.133366	1.02936e-58	3.27551e-58	16.16
LINC01418	0.357931	1.05551e-58	3.3578e-58	16.1585
ENSG00000301334	0.581665	1.37259e-58	4.36289e-58	16.1424
SLC30A10	0.402565	1.76282e-58	5.59706e-58	16.1268
ARHGEF17	0.252105	1.85723e-58	5.89603e-58	16.1235
TFAP2E	0.470299	4.05623e-58	1.28522e-57	16.0753
CNTN5	0.177638	5.24486e-58	1.66092e-57	16.0592
ENSG00000272942	0.694937	5.78839e-58	1.83229e-57	16.0533
RNF138	0.264437	5.92685e-58	1.87586e-57	16.0516
ANKS6	0.251917	9.10331e-58	2.87765e-57	16.0249
ENSG00000240086	0.489057	9.14583e-58	2.89069e-57	16.0247
ENSG00000269110	0.34813	1.00755e-57	3.18409e-57	16.0187
MIAT	0.117857	1.14075e-57	3.60257e-57	16.0108
SLC45A1	0.438135	1.40326e-57	4.42854e-57	15.9981
ENSG00000269237	0.305319	1.53077e-57	4.82961e-57	15.9926
TBL1Y	0.494289	1.53332e-57	4.83699e-57	15.9926
ENSG00000304444	1.23902	2.10091e-57	6.61662e-57	15.9735
PPIE	0.315726	2.08868e-57	6.57902e-57	15.9732
ENSG00000253500	0.740034	2.17693e-57	6.85418e-57	15.9709
PFKP	0.207566	3.07766e-57	9.68088e-57	15.9489
ZNF48	0.367106	3.09132e-57	9.72253e-57	15.9487
ENSG00000308541	1.00961	3.59136e-57	1.12921e-56	15.9397
ENSG00000305357	0.604681	4.37803e-57	1.37581e-56	15.9271
ENSG00000293866	1.45096	4.83091e-57	1.5175e-56	15.9216
NOVA2	0.18429	5.52757e-57	1.73526e-56	15.9123
STARD13-AS	1.01576	5.83056e-57	1.83002e-56	15.9094
CALM1	0.188543	8.14448e-57	2.55245e-56	15.888
ADCY10P1-1	0.825493	9.62269e-57	3.01407e-56	15.8779
ENSG00000227769	0.852941	1.10295e-56	3.45283e-56	15.8693
MAST2	0.124956	1.89558e-56	5.91971e-56	15.8349
ITM2C	0.434562	2.30289e-56	7.1829e-56	15.8227
FAM3C	0.304671	3.60327e-56	1.12237e-55	15.7944
FTCD	0.529164	2.06029e-55	6.38294e-55	15.6841
LINC02391	0.843145	2.22032e-55	6.87592e-55	15.6795
ENSG00000290835	0.320382	2.3903e-55	7.39836e-55	15.6746
ENSG00000225963	0.723382	2.95254e-55	9.12874e-55	15.6613
ENSG00000297458	1.73277	3.92061e-55	1.21039e-54	15.6441
RPH3AL	0.29829	5.80503e-55	1.79024e-54	15.618
ENSG00000294131	0.949682	6.0641e-55	1.86939e-54	15.6156
RPSAP52-1	0.674132	6.7923e-55	2.09331e-54	15.6081
ENSG00000249685	1.08233	7.4395e-55	2.29092e-54	15.6026
ENSG00000270403	1.07875	9.52612e-55	2.92995e-54	15.5868
CTNNBL1	0.183377	1.70284e-54	5.22554e-54	15.5491
PRSS55	0.657372	1.88057e-54	5.76863e-54	15.543
WSCD2	0.452816	2.7042e-54	8.27856e-54	15.5196
PPP2R5A	0.343145	3.88333e-54	1.18725e-53	15.4962
ENSG00000294881	1.66555	4.87923e-54	1.49113e-53	15.4825
PGM2L1	0.187161	4.86211e-54	1.4861e-53	15.4817
ENSG00000288993	0.333957	6.57476e-54	2.0061e-53	15.4624
ENSG00000285706	1.43722	1.02971e-53	3.13978e-53	15.4342
KCNA1	1.42501	1.12561e-53	3.43039e-53	15.4284
ENSG00000296429	1.08605	1.18649e-53	3.61495e-53	15.4246
LRRC20	0.233339	2.07826e-53	6.31608e-53	15.3879
KIAA0825	0.149538	3.38895e-53	1.02818e-52	15.3562
SLC15A5	1.53997	3.52289e-53	1.06867e-52	15.3546
ARHGAP8	0.374322	4.02564e-53	1.22038e-52	15.3451
ENSG00000286776	1.68267	4.1872e-53	1.26918e-52	15.3434
OR3A2	0.49758	6.53315e-53	1.97558e-52	15.3137
ENSG00000249207	0.678261	7.93305e-53	2.39732e-52	15.3011
ENSG00000266302	0.192817	8.00862e-53	2.41984e-52	15.3003
DYNLT2B	0.210001	1.4123e-52	4.25502e-52	15.2633
NREP-AS1	1.20608	1.43879e-52	4.33427e-52	15.2626
SRD5A3	0.45568	1.46705e-52	4.41826e-52	15.2609
CSPP1	0.134699	2.09968e-52	6.31358e-52	15.2374
SAXO2	0.378291	2.27764e-52	6.84422e-52	15.2321
ENSG00000301193	1.18315	2.70893e-52	8.13493e-52	15.2212
CCDC30	0.202771	2.84187e-52	8.52968e-52	15.2176
BBS5	0.389167	3.14297e-52	9.4285e-52	15.211
MCTS1	0.309547	3.33531e-52	1.00042e-51	15.2071
ENSG00000289376	1.1999	4.00391e-52	1.20018e-51	15.1956
ENSG00000299017	0.700468	5.96212e-52	1.78483e-51	15.1692
ANKAR	0.226674	6.48841e-52	1.94213e-51	15.1634
ENSG00000275649	0.893058	9.20355e-52	2.75018e-51	15.1408
SSBP4	0.237548	1.29561e-51	3.86549e-51	15.1179
ENSG00000296607	0.473478	1.73254e-51	5.16171e-51	15.0988
CAMKK2	0.185395	1.78335e-51	5.31239e-51	15.0968
PKD1L1	0.514299	3.42425e-51	1.0182e-50	15.0538
AMER3	0.355983	3.60229e-51	1.07072e-50	15.0504
COLEC10	1.20925	3.81276e-51	1.13299e-50	15.0472
ENSG00000295862	0.547338	3.85637e-51	1.1458e-50	15.046
IMPDH1	0.383369	5.0251e-51	1.49209e-50	15.0284
ARHGEF33	0.396255	5.35066e-51	1.58834e-50	15.0242
BRI3BP	0.335728	6.95595e-51	2.06408e-50	15.0068
KIFC3	0.255822	7.28568e-51	2.16164e-50	15.0037
ENSG00000296522	1.12187	7.95699e-51	2.36021e-50	14.9982
SLC6A7	0.484973	9.16114e-51	2.71598e-50	14.9886
JAG2	0.303764	1.31853e-50	3.90548e-50	14.9642
CBLB	0.13114	1.53032e-50	4.52931e-50	14.9543
ENSG00000299990	0.628735	1.98697e-50	5.87179e-50	14.937
BCAR3	0.269601	1.98221e-50	5.85847e-50	14.937
PNMA8B	0.603264	2.0384e-50	6.02222e-50	14.9354
SRRM1	0.161904	2.06913e-50	6.11224e-50	14.9342
SMURF1	0.161379	2.87865e-50	8.4883e-50	14.9121
LSP1P5-1	0.329294	2.93711e-50	8.65737e-50	14.9108
PICALM	0.134875	3.84796e-50	1.13334e-49	14.8927
TRPM2	0.44142	4.17901e-50	1.23022e-49	14.8873
ENSG00000269749	0.545319	5.1028e-50	1.50082e-49	14.8739
PARVB	0.290799	7.6116e-50	2.23527e-49	14.847
CCDC144NL-AS1	0.735029	7.67291e-50	2.25299e-49	14.8467
SLC35F4	0.313538	7.99005e-50	2.34581e-49	14.8438
GAS6	0.211856	8.13078e-50	2.38651e-49	14.8426
ENSG00000286618	0.864298	1.09188e-49	3.19913e-49	14.823
TCEAL2	0.372713	1.48716e-49	4.35393e-49	14.8021
IER5	0.973171	1.53515e-49	4.49387e-49	14.8002
ENSG00000232667	1.0997	2.0686e-49	6.04853e-49	14.7802
ENSG00000300395	1.33211	3.6347e-49	1.06062e-48	14.7423
LINC02940	0.755935	3.79272e-49	1.10617e-48	14.7391
INPP1	0.440615	5.06599e-49	1.47565e-48	14.7193
RERG	0.440189	5.20888e-49	1.51689e-48	14.7175
TMEM74	0.56698	5.65944e-49	1.64747e-48	14.7119
ENSG00000277715	0.736579	5.90179e-49	1.71715e-48	14.7091
ENSG00000284707	0.128395	6.55926e-49	1.9082e-48	14.7018
PDIA2	0.406032	7.38303e-49	2.14649e-48	14.6939
ENSG00000304884	1.33413	8.82921e-49	2.565e-48	14.6822
SOCS7	0.18088	9.00013e-49	2.61432e-48	14.6803
AHRR	0.392177	9.40943e-49	2.73253e-48	14.6774
SHANK3	0.185031	1.00314e-48	2.91279e-48	14.673
PLAC4	1.7522	1.17945e-48	3.41911e-48	14.6627
MAP3K15	0.80284	1.20743e-48	3.49978e-48	14.6606
PPP1R16B	0.234513	1.47656e-48	4.27609e-48	14.6467
ENSG00000285852	1.63516	1.61718e-48	4.68157e-48	14.6413
ENSG00000291143	0.586963	1.84024e-48	5.32528e-48	14.6318
CD226	0.584279	1.88588e-48	5.45597e-48	14.6301
ENSG00000284418	0.482153	2.0932e-48	6.05197e-48	14.623
CLIP4	0.236746	2.36735e-48	6.8403e-48	14.6146
MAP4K3	0.131403	2.4096e-48	6.96152e-48	14.6133
PLA2G4C	0.33371	2.66638e-48	7.70046e-48	14.6065
LINC00680-1	0.182702	3.16774e-48	9.14035e-48	14.5947
ENSG00000231781	1.33366	3.57319e-48	1.03038e-47	14.5871
ENSG00000295957	0.828089	4.09485e-48	1.18021e-47	14.5774
ENSG00000297123	0.904554	6.2372e-48	1.79453e-47	14.5487
CDK17	0.177913	7.91493e-48	2.27496e-47	14.532
RAPGEF1	0.132589	8.62836e-48	2.47878e-47	14.5261
ENSG00000287047	1.62201	9.50762e-48	2.73069e-47	14.5201
EFCAB7	0.198456	9.63617e-48	2.76727e-47	14.5185
FBXO41	0.280395	1.0461e-47	3.00226e-47	14.5129
PIK3CD	0.305607	1.37523e-47	3.94096e-47	14.4942
ENSG00000287463	1.63012	1.61474e-47	4.62212e-47	14.4839
ENSG00000291209	1.73591	1.67396e-47	4.79106e-47	14.4815
ENSG00000297978	0.957365	2.06684e-47	5.90961e-47	14.4664
ENSG00000307696	1.38785	2.11033e-47	6.03324e-47	14.4653
ZNF467	0.92858	2.97029e-47	8.48334e-47	14.4414
ARRDC4	0.493737	3.01622e-47	8.61238e-47	14.4401
KCNK12	0.386916	3.11836e-47	8.90069e-47	14.4378
ENSG00000286982	1.1358	3.83596e-47	1.09421e-46	14.4239
LINC01476	0.93247	4.16389e-47	1.18702e-46	14.4181
DHX8	0.19433	4.30893e-47	1.22822e-46	14.4154
IRF2BP2	0.39391	6.87055e-47	1.95523e-46	14.3832
SLCO4A1	0.488727	8.92789e-47	2.53725e-46	14.3651
HLCS	0.163152	9.19929e-47	2.61374e-46	14.3629
ENSG00000307961	0.541918	1.04383e-46	2.96503e-46	14.3543
ENSG00000287374	1.22666	1.08304e-46	3.07567e-46	14.3521
ENSG00000244706	0.978789	1.08866e-46	3.09124e-46	14.3516
ENSG00000289311	0.233716	1.34527e-46	3.8161e-46	14.3366
POLE	0.182612	2.18017e-46	6.16924e-46	14.303
TTC14	0.15464	2.56511e-46	7.25137e-46	14.2916
TMEM132A	0.24757	2.58725e-46	7.31305e-46	14.2911
GFPT2	0.319172	2.66119e-46	7.52112e-46	14.2891
EVI5L	0.181422	2.68722e-46	7.59377e-46	14.2884
ENSG00000286971	1.69196	3.02277e-46	8.53988e-46	14.281
ARHGEF12	0.121245	3.01517e-46	8.51947e-46	14.2804
ENSG00000304089	0.720365	3.36315e-46	9.49919e-46	14.273
SEPTIN1	0.536961	4.03321e-46	1.1382e-45	14.2602
ENSG00000285826	0.963591	4.0541e-46	1.14395e-45	14.26
OSBP2	0.121094	4.25364e-46	1.19996e-45	14.2563
ENSG00000293274	0.577834	4.29326e-46	1.21084e-45	14.2558
SNX30	0.19064	4.30606e-46	1.2143e-45	14.2555
CEP15	0.365167	4.69451e-46	1.32336e-45	14.2495
RASGRP2	0.385798	5.79823e-46	1.63409e-45	14.2348
IL17D	0.348865	6.36118e-46	1.79143e-45	14.2283
MYOSLID-AS1	0.662948	6.7165e-46	1.89126e-45	14.2246
ENSG00000287358	0.620384	9.02654e-46	2.53956e-45	14.2039
CLTB	0.338241	9.30736e-46	2.61824e-45	14.2016
ENSG00000285935	1.61746	1.22785e-45	3.45025e-45	14.1828
ENSG00000296496	0.947218	1.50255e-45	4.21907e-45	14.1682
ENSG00000287938	0.947734	1.89489e-45	5.31942e-45	14.1519
LINC01215	1.32354	2.44393e-45	6.85655e-45	14.1342
LOXL2	0.220895	2.88573e-45	8.09109e-45	14.122
ENSG00000287527	0.711242	3.22858e-45	9.04798e-45	14.1143
KYAT1	0.199472	3.83697e-45	1.07477e-44	14.1019
LINC00842	0.705101	3.85661e-45	1.08014e-44	14.1017
XK	0.823447	5.94413e-45	1.66137e-44	14.0712
BICRAL	0.146048	7.64332e-45	2.13395e-44	14.0531
ENSG00000291113	0.213914	8.36403e-45	2.3346e-44	14.0468
AGBL3	0.296469	9.32159e-45	2.59967e-44	14.0391
CHAT	0.808279	9.78527e-45	2.72865e-44	14.0358
ENSG00000296434	1.68957	1.01901e-44	2.84119e-44	14.0336
LINC02645	0.533528	1.60925e-44	4.47876e-44	14.0004
ENSG00000300455	1.27262	1.6542e-44	4.60275e-44	13.9989
ENSG00000249753	1.19523	2.32752e-44	6.4684e-44	13.9744
ENSG00000253678	0.265969	2.67319e-44	7.42187e-44	13.9642
FBXW12	0.610929	2.8604e-44	7.93782e-44	13.9594
GCSIR	1.34747	4.64136e-44	1.28615e-43	13.9254
PKD2L2-DT	0.269407	4.7471e-44	1.31529e-43	13.9232
SVBP	0.330456	5.49689e-44	1.52267e-43	13.9127
EML4	0.181247	6.25832e-44	1.73254e-43	13.9034
ENSG00000263603	0.264106	6.30589e-44	1.7455e-43	13.9028
NAAA	0.476026	7.52854e-44	2.08194e-43	13.8902
KCNJ9	0.498564	7.86453e-44	2.17354e-43	13.8871
ENSG00000257759	0.231975	8.44144e-44	2.3327e-43	13.8819
ENSG00000283674	0.180429	1.06226e-43	2.93228e-43	13.8654
RASAL2	0.112252	1.0789e-43	2.97784e-43	13.8643
ENSG00000258881	0.78952	1.26318e-43	3.48521e-43	13.8532
ERICH5	1.10799	1.97109e-43	5.42995e-43	13.8214
SEMA3F	0.287906	2.0199e-43	5.56308e-43	13.8192
ENSG00000285556	0.813486	2.12904e-43	5.86225e-43	13.8157
PLBD2	0.200266	2.37451e-43	6.5358e-43	13.8076
ZNF22-AS1	0.559937	2.5271e-43	6.95414e-43	13.8032
TRIM58	0.509744	2.57296e-43	7.07949e-43	13.8018
ENSG00000307634	0.735712	2.64124e-43	7.26562e-43	13.8001
NGF	0.957749	3.09279e-43	8.50369e-43	13.7888
CNGA4	0.882398	3.38331e-43	9.29694e-43	13.7822
MACROD2-AS1	0.783522	4.48335e-43	1.23021e-42	13.7618
CCNH	0.130295	5.69276e-43	1.56095e-42	13.7443
ENSG00000274993	1.17033	6.15294e-43	1.68652e-42	13.7392
ZNF793	0.17686	6.30348e-43	1.72758e-42	13.737
ENSG00000310167	1.13503	7.11816e-43	1.9497e-42	13.7286
DPT	1.40783	7.13657e-43	1.9545e-42	13.7285
PHC2	0.14258	7.21376e-43	1.97541e-42	13.7272
OR51B5	0.478928	8.00525e-43	2.19111e-42	13.7197
RPAP2	0.130889	8.7639e-43	2.39733e-42	13.7131
ENSG00000286353	0.546263	9.68189e-43	2.64687e-42	13.7059
ENSG00000308207	0.953371	1.50055e-42	4.09058e-42	13.6742
ENSG00000289156	0.46978	1.49905e-42	4.08698e-42	13.6741
FRMD4A	0.0739778	1.69361e-42	4.61579e-42	13.6652
FBLIM1	0.248168	1.81441e-42	4.94268e-42	13.6602
ALMS1P1-1	0.303535	1.92263e-42	5.23624e-42	13.656
ZDHHC2	0.223531	2.67756e-42	7.28105e-42	13.6318
ENSG00000304771	0.880261	3.21105e-42	8.7266e-42	13.6188
ENSG00000286100	0.649037	3.58863e-42	9.75043e-42	13.6105
ABCA1	0.195272	3.79699e-42	1.03129e-41	13.6062
ENSG00000288830	0.277156	5.12718e-42	1.3911e-41	13.5843
ENSG00000285942	0.247458	7.41711e-42	2.00885e-41	13.5572
C16orf87	0.258144	7.66625e-42	2.07584e-41	13.5547
ENSG00000294686	1.16444	9.14343e-42	2.47407e-41	13.5421
ENSG00000290559	0.343578	9.75333e-42	2.63848e-41	13.5371
LINC01951	0.691807	1.60301e-41	4.32781e-41	13.5006
DAP-DT	1.68531	1.68946e-41	4.55962e-41	13.4972
CCNA1	1.00384	1.77112e-41	4.77776e-41	13.4934
ENSG00000303631	0.301052	1.94769e-41	5.25038e-41	13.4861
LINC01902	0.539917	2.04481e-41	5.50961e-41	13.4826
AXIN2	0.233464	2.21825e-41	5.97414e-41	13.4765
RFLNB	0.995319	2.42365e-41	6.52426e-41	13.4703
FAM66D	0.179108	2.53251e-41	6.8157e-41	13.4667
CAMK1G	0.601853	2.68005e-41	7.21193e-41	13.4626
FHL2	0.58412	2.70317e-41	7.2733e-41	13.462
ENSG00000302351	0.474007	2.93418e-41	7.8921e-41	13.4559
LGI1	0.307619	3.69307e-41	9.92516e-41	13.4388
BCAP29	0.21904	4.00561e-41	1.07639e-40	13.4328
ENSG00000214546	0.793693	4.61414e-41	1.2389e-40	13.4225
APPAT	0.304056	5.88355e-41	1.57863e-40	13.4043
KIF26A	0.248799	6.06273e-41	1.62632e-40	13.4021
IQSEC3	0.178949	8.2245e-41	2.20288e-40	13.3794
ENSG00000304345	1.05754	1.58398e-40	4.23124e-40	13.3308
ENSG00000274767	0.859665	1.91515e-40	5.11352e-40	13.3166
BRPF3-AS1	0.379498	2.0207e-40	5.39407e-40	13.3124
ENSG00000259345	0.199864	2.28089e-40	6.08369e-40	13.3033
ENSG00000304903	0.686799	2.4592e-40	6.55701e-40	13.2978
NUP50-DT	0.225747	2.46438e-40	6.57005e-40	13.2975
AP4S1	0.205213	2.87918e-40	7.67413e-40	13.2859
PTPN20	0.536513	3.03757e-40	8.09445e-40	13.2819
ENSG00000300244	0.573721	3.77796e-40	1.00581e-39	13.2656
ENSG00000299329	1.26101	3.81863e-40	1.01652e-39	13.2651
GRID2IP	0.505771	4.25805e-40	1.1331e-39	13.2566
ENSG00000274276	0.921918	5.05309e-40	1.34389e-39	13.2439
AMZ1	0.302407	5.69629e-40	1.5139e-39	13.2347
DPH6	0.176709	6.36841e-40	1.69116e-39	13.2263
LINC03051	0.474978	6.64016e-40	1.76251e-39	13.2232
ENSG00000289503	0.57275	6.67421e-40	1.77134e-39	13.2228
SMIM12	0.217662	9.0725e-40	2.40397e-39	13.1996
FAM181B	0.74077	1.0228e-39	2.7089e-39	13.1907
XACT	0.328415	1.40463e-39	3.71719e-39	13.1667
SYCE1	0.564798	1.71524e-39	4.53343e-39	13.1516
CELF5	0.10591	1.75768e-39	4.64454e-39	13.1497
ENSG00000276960	0.912926	2.25499e-39	5.95179e-39	13.131
ENSG00000303790	0.34774	2.25642e-39	5.95488e-39	13.1308
ASAH1	0.256918	2.51627e-39	6.63608e-39	13.1225
CCDC92	0.115881	2.60607e-39	6.87213e-39	13.1198
AP1M1	0.18576	4.51615e-39	1.18885e-38	13.0781
UBE2Q2P1	0.163742	4.73031e-39	1.24508e-38	13.0745
ENSG00000307602	1.61616	5.32221e-39	1.40024e-38	13.0661
CILK1	0.207889	5.94445e-39	1.56323e-38	13.0572
SOCS2	0.570859	6.07966e-39	1.59861e-38	13.0555
ENSG00000286782	0.393329	6.207e-39	1.6319e-38	13.0539
ENSG00000308022	0.954592	6.52426e-39	1.71512e-38	13.0503
NLGN1-AS1	1.1374	7.70289e-39	2.02265e-38	13.0377
ENSG00000290685	0.338355	7.846e-39	2.05999e-38	13.036
ENSG00000307112	0.59697	8.41171e-39	2.20776e-38	13.0308
ENSG00000251259	0.799068	8.72061e-39	2.28805e-38	13.0281
LIN28B	0.399757	9.09701e-39	2.38572e-38	13.0247
SLC41A2	0.15007	9.27051e-39	2.43094e-38	13.0232
ZNF385D-AS1	1.19306	1.00806e-38	2.64307e-38	13.0172
GCAWKR	1.04582	1.45733e-38	3.81406e-38	12.9889
NMD3	0.204076	2.04022e-38	5.3323e-38	12.9629
ZNF585A	0.225179	2.38687e-38	6.23122e-38	12.9508
ENSG00000310173	0.943089	2.94203e-38	7.67271e-38	12.935
COL24A1	0.426649	3.04607e-38	7.94133e-38	12.9321
SCTR	0.938665	3.7722e-38	9.82772e-38	12.9158
ENSG00000230894	1.35079	3.97899e-38	1.03653e-37	12.9119
ENSG00000232855	0.222601	4.66651e-38	1.21439e-37	12.8992
ENSG00000300447	1.08206	4.74105e-38	1.23365e-37	12.8983
SLC12A5-AS1	1.03382	4.93516e-38	1.28387e-37	12.8952
ENSG00000248647	0.782935	5.90466e-38	1.53539e-37	12.8812
MYBPC1	1.03379	6.11114e-38	1.58872e-37	12.8786
ARRDC1	0.261868	6.09834e-38	1.58557e-37	12.8786
ENSG00000304328	0.651727	6.15559e-38	1.59991e-37	12.8779
MAP6	0.115598	6.41677e-38	1.66761e-37	12.8746
ENSG00000283538	0.360958	1.1302e-37	2.92991e-37	12.8309
THY1	0.305183	1.24326e-37	3.22047e-37	12.8235
ENSG00000295212	0.432888	1.45919e-37	3.77768e-37	12.8111
B4GALT6	0.235096	1.6658e-37	4.31013e-37	12.8007
PRICKLE2-AS3	1.26587	1.79115e-37	4.63133e-37	12.7954
ENSG00000309946	0.208695	2.0786e-37	5.37156e-37	12.7835
FAM151B-DT	0.366163	2.20518e-37	5.69548e-37	12.7789
ENSG00000288782	1.14788	2.59254e-37	6.69219e-37	12.7666
ENSG00000272505	0.31121	2.77267e-37	7.15474e-37	12.7611
ENSG00000304344	0.827132	2.81777e-37	7.27032e-37	12.76
PRUNE2	0.218103	2.87832e-37	7.4257e-37	12.7582
COCH	0.325939	3.18357e-37	8.20769e-37	12.7503
B3GNT4	0.501547	3.47618e-37	8.95905e-37	12.7435
ENSG00000308692	0.874828	3.62996e-37	9.35434e-37	12.7402
GPR143	0.709581	4.2271e-37	1.08871e-36	12.7283
JAKMIP2	0.0952071	4.3782e-37	1.1275e-36	12.7254
LINC01829	0.405091	4.69267e-37	1.20781e-36	12.72
TTC5	0.273818	5.38345e-37	1.38482e-36	12.7093
PEX3	0.182895	7.33288e-37	1.88376e-36	12.685
ENSG00000298702	0.18149	7.33523e-37	1.88415e-36	12.685
ENSG00000289997	0.380753	7.58066e-37	1.94654e-36	12.6825
CAMK2G	0.144159	8.93518e-37	2.29282e-36	12.6695
MUC19	0.990844	9.08942e-37	2.33214e-36	12.6685
CTDSPL	0.130782	1.01276e-36	2.59734e-36	12.6597
ENSG00000303199	0.873522	1.13237e-36	2.90151e-36	12.6511
TCHH	0.810728	1.31871e-36	3.37672e-36	12.6391
ENSG00000265643	0.458816	1.75372e-36	4.48663e-36	12.6165
ENSG00000301647	1.05491	1.86149e-36	4.76074e-36	12.6121
ERFL	0.50174	1.88228e-36	4.81339e-36	12.611
ENSG00000298087	0.567439	2.0816e-36	5.3219e-36	12.6031
HTR6	1.41619	2.38889e-36	6.10482e-36	12.5925
PPP2R1B	0.216428	2.51887e-36	6.43555e-36	12.5879
DNM1	0.118785	2.65026e-36	6.76975e-36	12.5839
HTT-AS	0.837325	2.91235e-36	7.43674e-36	12.5766
NEXMIF	0.103077	3.2549e-36	8.30532e-36	12.5677
ENSG00000303682	1.35245	4.11981e-36	1.05014e-35	12.5493
NXPH4	0.511844	4.41365e-36	1.12491e-35	12.5436
ENSG00000262362	0.820486	4.5936e-36	1.17038e-35	12.5406
GOLT1B	0.276182	5.06234e-36	1.28938e-35	12.5327
LHPP	0.19497	5.35316e-36	1.36285e-35	12.5282
ENSG00000297704	0.903435	5.5676e-36	1.41729e-35	12.5253
NOL3	0.547908	8.33058e-36	2.11829e-35	12.4932
ENSG00000251076	1.02218	9.07367e-36	2.30597e-35	12.4865
GGTA1	0.658102	1.05383e-35	2.67553e-35	12.4745
IQANK1	0.404156	1.25465e-35	3.18432e-35	12.4605
ENSG00000288759	0.436776	1.72416e-35	4.36968e-35	12.4351
ENSG00000309085	1.3391	1.7337e-35	4.39337e-35	12.435
PKN2-AS1	0.241832	1.80514e-35	4.57342e-35	12.4314
ENSG00000301216	0.435763	1.96372e-35	4.97407e-35	12.4247
MYOM2	0.438552	2.1333e-35	5.40065e-35	12.4181
NUP93-DT	0.520724	2.43596e-35	6.16348e-35	12.4075
CCN3	1.0785	2.5459e-35	6.43952e-35	12.4041
RNF175	0.188635	2.61677e-35	6.61805e-35	12.4017
LRRTM3	0.158303	2.79537e-35	7.06586e-35	12.3964
CNIH3-AS2	1.22167	2.94784e-35	7.44879e-35	12.3924
ATP2B1	0.127206	3.85269e-35	9.72562e-35	12.3706
PTPN18	0.234346	3.9241e-35	9.90371e-35	12.3692
TMEM145	0.274701	3.94039e-35	9.94371e-35	12.3688
FNBP1L	0.0761131	4.35559e-35	1.09819e-34	12.3607
DAAM1	0.0980001	4.81252e-35	1.21286e-34	12.3527
ENSG00000259868	0.335681	4.94455e-35	1.24586e-34	12.3506
NEPRO-AS1	0.22566	6.09219e-35	1.53318e-34	12.3337
ENSG00000225214	1.08124	6.80987e-35	1.71305e-34	12.325
ENSG00000285541	1.12091	8.75524e-35	2.2e-34	12.3048
SPIRE2	0.155819	8.99266e-35	2.25917e-34	12.3023
SLC16A9	0.21469	1.16727e-34	2.93086e-34	12.2812
FAM120B	0.0990741	1.40863e-34	3.5334e-34	12.266
KCNC4	0.313281	1.52118e-34	3.81449e-34	12.2598
EPB41L3	0.125464	2.53197e-34	6.33322e-34	12.2184
AP4B1	0.270997	2.96726e-34	7.41719e-34	12.2055
LINC02575	0.51108	3.14596e-34	7.86045e-34	12.2008
ENSG00000287756	1.10521	3.85765e-34	9.62927e-34	12.1843
ENSG00000292309	0.344263	4.26023e-34	1.06249e-33	12.176
ENSG00000273149	0.470211	4.69624e-34	1.17047e-33	12.1681
ENSG00000257438	1.0519	4.86108e-34	1.21103e-33	12.1654
FMNL1-AS1	0.612902	5.24031e-34	1.30523e-33	12.1592
SUZ12P1	0.113123	5.87089e-34	1.46181e-33	12.1498
RAI14-DT	0.786174	6.51719e-34	1.6208e-33	12.1414
ENSG00000217334	0.889335	6.84514e-34	1.702e-33	12.1374
ABR-AS1	0.95948	7.20799e-34	1.79164e-33	12.1332
ENSG00000285868	0.435151	7.41088e-34	1.84187e-33	12.1308
ENSG00000284772	0.389454	7.62839e-34	1.89572e-33	12.1284
RASSF3	0.331339	7.64178e-34	1.89884e-33	12.1282
CHRM2	0.200693	7.95516e-34	1.9765e-33	12.1249
ACTL6B	0.161248	1.08372e-33	2.68792e-33	12.0995
ENSG00000291293	0.509238	1.12e-33	2.77699e-33	12.0969
ALG6	0.209938	1.19191e-33	2.95433e-33	12.0917
SEL1L2	0.635127	1.29867e-33	3.21688e-33	12.0848
AKAP7	0.186824	1.59016e-33	3.93553e-33	12.068
GLRA2	0.129307	2.02947e-33	5.01576e-33	12.0479
ENSG00000304354	0.706431	2.51295e-33	6.204e-33	12.0304
GSDME	0.237223	2.61998e-33	6.46754e-33	12.0268
TMC3	1.25141	2.73491e-33	6.74909e-33	12.0235
ENSG00000287694	0.320999	3.44231e-33	8.48567e-33	12.0042
CDC73	0.142591	3.72684e-33	9.1851e-33	11.9976
RAD51AP2	1.00995	4.2228e-33	1.04052e-32	11.9875
AMPH	0.153278	5.66889e-33	1.39505e-32	11.9629
ID2	0.353341	6.5917e-33	1.62058e-32	11.9503
ENSG00000251670	0.700727	8.37956e-33	2.05793e-32	11.9305
ST3GAL1-DT	0.874347	8.81844e-33	2.16525e-32	11.9263
CYB561D2	0.521526	9.61161e-33	2.35925e-32	11.919
ENSG00000273287	0.329925	1.04065e-32	2.55245e-32	11.9123
NPAP1	0.559109	1.13112e-32	2.77346e-32	11.9054
TRIM16L-1	0.30637	1.82825e-32	4.47613e-32	11.8652
HULC	0.27151	2.06642e-32	5.05655e-32	11.855
HENMT1	0.515993	2.22032e-32	5.43026e-32	11.849
LINC02018	0.193194	2.26032e-32	5.52691e-32	11.8474
UNC80	0.148352	2.41737e-32	5.90905e-32	11.8418
IL1RL2	0.802167	2.51389e-32	6.14301e-32	11.8386
PCSK9	0.595228	2.57606e-32	6.29427e-32	11.8365
ENSG00000309196	1.3756	2.65133e-32	6.4768e-32	11.8344
PRKACB	0.10534	2.9235e-32	7.13788e-32	11.8258
ENSG00000295690	0.559248	3.05729e-32	7.46376e-32	11.8221
GLT8D2	0.322597	3.53732e-32	8.63106e-32	11.8098
ENSG00000277511	0.483719	3.61302e-32	8.81483e-32	11.8081
SNAP91	0.0921483	3.87817e-32	9.45873e-32	11.8021
ENSG00000295572	0.81375	3.88584e-32	9.47643e-32	11.802
ENSG00000279954	0.361381	4.05803e-32	9.89423e-32	11.7983
LINC01250	0.191707	4.30412e-32	1.04931e-31	11.7933
TRIL	1.04701	5.16837e-32	1.25894e-31	11.7781
ENSG00000273664	1.11342	5.31304e-32	1.29391e-31	11.7758
LINC02802	0.732338	6.07951e-32	1.47979e-31	11.7643
ENSG00000306211	1.01843	6.86099e-32	1.66895e-31	11.7542
ENSG00000309761	1.16018	7.05875e-32	1.71633e-31	11.7518
LINC02220	1.25297	8.73353e-32	2.12063e-31	11.7338
ENSG00000307172	0.55226	9.62772e-32	2.33701e-31	11.7254
ENSG00000289289	0.310742	1.0021e-31	2.43221e-31	11.7219
SPATA33	0.222622	1.15499e-31	2.79975e-31	11.7099
H2AJ	1.41056	1.16158e-31	2.81545e-31	11.7097
JAK2	0.147562	1.40513e-31	3.40287e-31	11.6932
ENSG00000275734	0.277998	1.65132e-31	3.99614e-31	11.6795
ENSG00000297609	1.10683	1.70606e-31	4.12819e-31	11.6769
LDHAL6A	0.615613	1.84739e-31	4.46829e-31	11.67
CFAP161	0.183583	2.05442e-31	4.96588e-31	11.6609
GABRG2	0.26333	2.1754e-31	5.255e-31	11.656
NELFA	0.136801	2.53528e-31	6.1205e-31	11.643
FER1L4	0.740674	2.80238e-31	6.76105e-31	11.6345
ENSG00000300622	0.512884	2.85651e-31	6.89021e-31	11.6328
ENSG00000297977	0.547714	2.87022e-31	6.92255e-31	11.6324
ENSG00000255910	0.220965	3.09913e-31	7.46758e-31	11.6258
TMEM14A	0.308183	3.38818e-31	8.16066e-31	11.6182
ENSG00000301450	0.586868	4.01947e-31	9.66998e-31	11.6037
IRAG1-AS1	0.859866	4.13773e-31	9.94828e-31	11.6012
TSPAN1	0.968383	4.49738e-31	1.08096e-30	11.5941
ENSG00000267786	0.295905	4.6237e-31	1.11109e-30	11.5916
TINAG	1.47499	4.70898e-31	1.13134e-30	11.5904
ATP1A1	0.197991	5.60583e-31	1.34583e-30	11.5751
ENSG00000283321	0.811841	5.65816e-31	1.35825e-30	11.5744
ENSG00000233968	1.28031	5.95179e-31	1.42844e-30	11.5702
GSTM3	0.47767	7.78721e-31	1.8668e-30	11.5469
ENSG00000306379	0.40282	8.15062e-31	1.95331e-30	11.543
SNPH	0.192583	9.53457e-31	2.28355e-30	11.5294
ENSG00000302464	0.522051	1.08535e-30	2.59755e-30	11.5183
ENSG00000224076	1.22304	1.16642e-30	2.78983e-30	11.5123
UNC5B	0.312072	1.16443e-30	2.78536e-30	11.5122
ENSG00000293404	1.19244	1.18311e-30	2.82886e-30	11.5111
ENSG00000229425	0.762284	1.19742e-30	2.86247e-30	11.5099
FABP6	0.889796	1.511e-30	3.60762e-30	11.4898
SIMC1P1	0.153873	1.5694e-30	3.74627e-30	11.4864
WASF3-AS1	0.979816	1.82994e-30	4.36411e-30	11.4733
ENSG00000296543	0.979616	1.83108e-30	4.36639e-30	11.4732
SYS1-DBNDD2	0.309311	1.88019e-30	4.48117e-30	11.4708
ENSG00000289726	0.427585	2.11545e-30	5.03822e-30	11.4606
ENSG00000227189	0.175825	2.14699e-30	5.11228e-30	11.4593
ENSG00000300471	0.838268	2.43111e-30	5.78461e-30	11.4486
CYB5D2	0.162112	2.65111e-30	6.30351e-30	11.441
PRRG3	0.368761	3.2681e-30	7.76249e-30	11.4228
SPON1-AS1	0.481687	4.59994e-30	1.09057e-29	11.3931
ENSG00000285190	0.625785	4.95931e-30	1.17528e-29	11.3866
DNASE1	0.139475	5.40634e-30	1.28043e-29	11.379
ENSG00000288979	0.423407	5.46809e-30	1.29492e-29	11.378
ENSG00000303210	0.591916	6.34573e-30	1.50167e-29	11.3651
MROH7-TTC4	0.900641	6.52664e-30	1.54433e-29	11.3627
MUPP	0.829123	6.81771e-30	1.61287e-29	11.3588
BZW2	0.163691	9.94705e-30	2.34931e-29	11.3257
TXNIP	0.337413	1.2185e-29	2.8758e-29	11.3079
SLC22A5	0.293237	1.25711e-29	2.96663e-29	11.3051
ZNF185	0.47104	1.27122e-29	2.99961e-29	11.3042
DCTN1-AS1	0.94765	1.54952e-29	3.65368e-29	11.2869
KCNA4	0.65587	1.61948e-29	3.81785e-29	11.2829
ENSG00000288551	0.317799	1.90003e-29	4.47603e-29	11.2688
ADD3-AS1	0.519576	1.93594e-29	4.55968e-29	11.2672
ENSG00000288973	0.341281	2.14461e-29	5.04702e-29	11.2581
ENSG00000294282	0.747056	2.42732e-29	5.70885e-29	11.2473
CYYR1-AS1	0.412064	2.98993e-29	7.02416e-29	11.2288
ENSG00000291013	0.301834	3.19239e-29	7.49518e-29	11.223
FLRT2	0.0963534	3.52064e-29	8.26249e-29	11.2143
FAT2	0.672771	3.56447e-29	8.3645e-29	11.2133
PRR16	0.153066	3.69241e-29	8.66296e-29	11.2101
ENSG00000287315	0.689834	4.02203e-29	9.43341e-29	11.2026
ENSG00000304813	0.321936	4.06709e-29	9.53813e-29	11.2016
MFSD13A	0.312832	4.22675e-29	9.91054e-29	11.1981
CD247	0.432904	4.45649e-29	1.04439e-28	11.1935
LINC02289	0.416174	4.74027e-29	1.11044e-28	11.188
[truncated: 20,998 more rows]

## Sheet: GABA
gene	logfoldchange	pval	pval_adj	score
NRXN3	4.05965	0	0	495.25
ERBB4	3.7096	0	0	362.736
NXPH1	3.48108	0	0	277.751
CELF4	2.11965	0	0	264.052
ZNF536	2.77467	0	0	254.934
DLX6-AS1	3.32887	0	0	251.356
LHFPL3	2.57935	0	0	242.932
GAD1	3.65519	0	0	239.302
RIMS2	1.91424	0	0	235.869
GALNTL6	2.78666	0	0	231.611
SOX2-OT	2.37277	0	0	227.708
NPAS3	2.08743	0	0	222.512
RBMS3	2.57067	0	0	222.317
CNTNAP2	1.80166	0	0	221.11
ADARB2	2.74146	0	0	210.027
GAD2	3.53419	0	0	205.01
MEG3	1.67836	0	0	204.413
ENSG00000299420	3.03953	0	0	194.024
PDZRN3	2.63617	0	0	193.241
SLC6A1	2.19345	0	0	191.375
MIR325HG	2.0792	0	0	187.806
MEG8	2.00446	0	0	186.336
PTPRT	1.92699	0	0	185.597
ELFN1	2.7528	0	0	185.137
KCNIP1	1.78812	0	0	178.557
PAM	1.85286	0	0	177.974
ALK	3.12955	0	0	175.424
GRIA4	1.73814	0	0	174.105
ST8SIA5	2.82183	0	0	173.555
TENM2	1.45813	0	0	172.476
MAGI1	1.37901	0	0	170.724
VSTM2A	3.49553	0	0	165.275
SAMD5	1.90598	0	0	164.855
RIPOR2	2.25169	0	0	164.737
LINC01322	2.03589	0	0	160.939
ENSG00000288958	3.5173	0	0	160.714
IQSEC1	1.53941	0	0	159.926
MAPK10	1.19592	0	0	159.538
XKR4	1.25447	0	0	157.792
CCSER1	1.00445	0	0	155.699
CTNNA2	0.867273	0	0	155.307
PWRN4	2.48837	0	0	154.337
SNRPN	1.34362	0	0	152.964
CACNA1C	1.09825	0	0	152.86
GRIP2	2.28713	0	0	152.59
SPOCK3	2.45165	0	0	151.715
KSR2	2.0147	0	0	151.042
ATRNL1	1.19557	0	0	150.142
ARX	2.27421	0	0	149.804
FGF14	1.27923	0	0	148.325
RIMS1	1.1601	0	0	147.509
ENSG00000307510	3.09092	0	0	146.93
KCNMB2	1.71158	0	0	144.55
ENSG00000227681	1.93359	0	0	143.972
STXBP5L	1.29415	0	0	143.233
ENSG00000301653	3.41027	0	0	142.721
CNTN5	1.53566	0	0	141.738
TOX2	2.9082	0	0	141.667
SNHG14	0.919226	0	0	141.499
DCLK2	1.13243	0	0	141.331
KCNC2	2.14197	0	0	140.86
TENM3	1.43191	0	0	138.597
GALNT17	1.29965	0	0	137.517
NPAS1	3.22928	0	0	136.862
THRB	1.84965	0	0	136.487
LHX6	3.57914	0	0	134.839
ASIC2	1.5118	0	0	134.415
PLS3	2.90298	0	0	134.125
DAPK1	1.05062	0	0	133.851
LRFN5	1.25796	0	0	133.753
XKR6	1.04238	0	0	132.871
ABTB3	3.2717	0	0	132.202
PTCHD4	2.05483	0	0	131.491
ZBTB16	1.93976	0	0	131.485
CACNG2	1.47122	0	0	131.355
GRIK2	1.14706	0	0	131.081
PCDH15	1.92927	0	0	131.019
CACNA2D2	2.32233	0	0	130.78
ENSG00000271192	1.84686	0	0	130.561
TAFA2	1.22934	0	0	130.409
PDZRN4	1.99201	0	0	129.746
AGBL4	1.34692	0	0	129.542
GRIA1	0.896025	0	0	129.418
RMST	1.98436	0	0	128.309
CNTNAP4	1.62634	0	0	128.309
TSHZ2	2.10221	0	0	128.277
SGCD	1.60475	0	0	127.875
SLAIN1	1.1621	0	0	127.579
ENSG00000287976	1.95075	0	0	126.719
CSMD3	1.09347	0	0	126.509
DPP6	0.9311	0	0	126.01
SCN9A	1.3596	0	0	125.698
GRIK1	1.90917	0	0	125.623
TMEFF2	1.42259	0	0	124.811
KIRREL3	1.09538	0	0	124.685
GRIN3A	2.94332	0	0	124.617
GRIN2D	2.05242	0	0	124.04
FRMD5	0.936214	0	0	123.468
RPH3A	2.60202	0	0	122.722
CNTNAP5	1.18533	0	0	122.375
NEGR1	1.14373	0	0	121.954
CADPS	0.910771	0	0	121.896
RCAN2	2.07256	0	0	121.048
CACNA2D3	1.19837	0	0	120.881
RORA	1.1263	0	0	120.677
TENM1	1.13353	0	0	119.414
CDK14	0.995513	0	0	119.15
DNAH14	1.47383	0	0	119.101
DSCAML1	0.939413	0	0	117.548
ENSG00000291111	3.11188	0	0	116.082
CCDC88A	0.705425	0	0	115.875
ENSG00000299149	3.14753	0	0	115.78
BRINP2	1.73999	0	0	115.543
PARD3	1.1921	0	0	115.129
KLF12	0.949318	0	0	115.009
SORCS3	1.20989	0	0	114.225
GRM8	1.93063	0	0	114.004
PLD5	1.90838	0	0	112.93
CHD5	1.20666	0	0	112.728
CDH8	1.52464	0	0	112.051
SNTG1	0.955818	0	0	111.937
ERC2	0.689523	0	0	111.743
NELL1	1.12989	0	0	111.623
NALCN	1.63809	0	0	111.417
GRIP1	0.709686	0	0	110.575
ENSG00000286973	2.78336	0	0	110.124
NTNG1	1.60994	0	0	109.737
ENSG00000298352	1.76034	0	0	108.665
ERICH2-DT	3.01921	0	0	108.507
WLS	1.55937	0	0	108.447
LINC01414	1.88873	0	0	108.102
RASGRF2	2.07947	0	0	107.73
EPB41L4B	2.02694	0	0	107.237
PBX3	1.41788	0	0	107.223
ZNF618	1.16497	0	0	107.148
NXPH2	2.12441	0	0	106.867
DGKB	1.67504	0	0	106.497
ADGRL3	0.709098	0	0	106.102
ANKRD55	3.35893	0	0	105.809
SOX6	1.20662	0	0	105.653
MTSS1	0.743242	0	0	105.39
SLC24A3	1.1238	0	0	105.34
NRG2	1.23077	0	0	104.882
INPP4B	1.74696	0	0	104.846
PRKCA	0.906482	0	0	104.732
RAPGEF4	1.26856	0	0	104.278
SGCZ	1.33729	0	0	103.911
CA10	1.45115	0	0	103.291
SHISA6	1.30174	0	0	103.136
PDE4DIP	1.10828	0	0	102.718
CALB2	3.33609	0	0	102.701
RELN	1.93051	0	0	102.468
TRERF1	1.03334	0	0	102.356
RAB3C	1.0914	0	0	102.301
NETO1	1.92975	0	0	101.948
TMEM178B	0.59222	0	0	101.803
NR2F2-AS1	1.80217	0	0	101.767
TRHDE	2.34516	0	0	101.362
FGD3	1.49425	0	0	101.131
NRXN2	0.778617	0	0	101.026
DANT2	0.993344	0	0	100.846
TIAM1	0.95264	0	0	100.827
SCN1A	1.50451	0	0	100.824
PWRN1	0.898503	0	0	100.475
ENSG00000286069	3.16765	0	0	100.083
PROX1	2.84908	0	0	100.017
LINC00632	0.819903	0	0	100.016
KCND2	0.919557	0	0	99.6609
FAM222A	2.80786	0	0	99.3249
PIP5K1B	1.69011	0	0	98.7601
NTN4	1.40106	0	0	98.4277
CACNG4	0.884453	0	0	98.3723
TSPAN11	1.44115	0	0	98.0687
MCF2L2	1.23691	0	0	97.9149
TMEM123	1.78597	0	0	97.7355
MARCHF11	2.27091	0	0	97.6103
PAK3	0.708832	0	0	97.3223
SV2C	2.66365	0	0	97.2741
ENSG00000290955	3.20005	0	0	97.192
BRINP1	1.15198	0	0	97.0687
DOCK11	1.33401	0	0	96.9599
ABCA5	1.43441	0	0	96.5826
PARP8	1.21274	0	0	96.5363
PALM2AKAP2	0.961563	0	0	96.4332
PEG3	1.22329	0	0	96.3096
DCX	0.832219	0	0	95.7879
TRPM3	0.944051	0	0	95.174
PTPRJ	0.891337	0	0	95.1694
SASH1	1.3057	0	0	95.1692
KITLG	1.73417	0	0	94.5839
FAM135B	1.03812	0	0	94.1193
ABLIM3	1.25284	0	0	93.9599
MAGI2	0.546148	0	0	93.9359
CHRM2	1.48426	0	0	93.83
CAMTA1	0.59463	0	0	93.5804
ENSG00000285940	1.4693	0	0	93.4873
SLC35F4	1.85711	0	0	92.9282
CAMK2A	1.77974	0	0	92.5587
KCNH8	0.88868	0	0	91.8205
ENSG00000255910	1.64595	0	0	91.6001
RNF220	1.64419	0	0	91.4404
ARNT2	0.828895	0	0	91.3267
MYCBP2	0.636857	0	0	91.3187
INSYN2B	2.17957	0	0	89.7136
AHI1	1.01128	0	0	89.5312
ZNF804B	1.1541	0	0	89.3619
EPHA6	0.843261	0	0	89.1465
REPS2	1.26706	0	0	89.125
GREB1L	1.89545	0	0	89.0144
LINC01145-1	2.08093	0	0	88.848
QKI	0.755007	0	0	88.6499
GRM7	0.824303	0	0	88.5664
CEMIP2	1.39341	0	0	88.5614
OTUD7A	0.811239	0	0	88.0942
RAB27B	1.87183	0	0	87.7271
TCERG1L	1.51827	0	0	87.584
SPOCK2	2.1473	0	0	87.5359
ABLIM2	0.947795	0	0	87.1894
ZNF385D	0.973076	0	0	86.9143
THSD7B	1.05322	0	0	86.7002
MAF	2.85143	0	0	86.6393
TPST1	0.810099	0	0	86.5259
VWC2	1.7877	0	0	86.2543
KCNIP4	0.899704	0	0	86.23
PTPRR	1.57428	0	0	86.1253
RBMS1	1.73104	0	0	85.7814
VWC2L	2.19261	0	0	85.681
NR3C2	1.5508	0	0	85.2074
SOX1-OT	1.46105	0	0	85.2072
DCLK1	0.492673	0	0	85.0371
UNC79	0.621568	0	0	85.0115
ZNF521	1.32243	0	0	84.5121
SLC2A11	1.47483	0	0	84.4138
DLGAP3	1.49286	0	0	84.3233
PLCXD3	1.26705	0	0	83.8482
DLGAP2	0.800573	0	0	83.7202
FRAS1	1.11383	0	0	83.596
KCTD8	1.5665	0	0	83.5875
AKAP6	0.55245	0	0	83.4484
ZFHX3	0.884916	0	0	82.6038
PACRG	1.04051	0	0	82.4885
CHL1	0.618895	0	0	82.1574
CACNA1D	0.883014	0	0	82.1328
ELAVL2	0.847875	0	0	81.8537
ELMO1	0.738254	0	0	81.452
ENSG00000274642	1.73037	0	0	81.398
SLC12A5	1.67832	0	0	81.3038
LINC01138	1.10067	0	0	81.1171
SPATS2L	0.932303	0	0	81.0786
NMNAT2	0.606207	0	0	81.024
FTX	0.394316	0	0	80.9197
RIT2	1.25833	0	0	80.859
CNTN6	1.60199	0	0	80.7934
EBF3	2.90348	0	0	80.7759
SVOP	0.866103	0	0	80.7397
LINGO2	0.776413	0	0	80.6926
NCAM2	0.731097	0	0	80.681
ANK3	0.529401	0	0	80.6688
GREB1	1.72561	0	0	80.5524
OPRM1	2.66372	0	0	80.3265
NETO2	0.778002	0	0	80.1974
PLCB4	0.824988	0	0	80.1319
NAALAD2	2.02475	0	0	80.0364
IL1RAPL1	0.716585	0	0	79.8148
CUX1	0.62183	0	0	79.7216
ENSG00000283982	1.05919	0	0	79.3162
GALNT14	0.987719	0	0	79.1787
CPNE4	1.27286	0	0	79.1627
SYNPR	1.75177	0	0	79.0709
SCML4	2.86825	0	0	78.9321
GABRG3	0.847407	0	0	78.8322
ENSG00000214265	0.697385	0	0	78.7214
CDH9	1.84763	0	0	78.5755
ECE2	2.16777	0	0	78.5339
PROX1-AS1	2.90489	0	0	78.3594
KCNB2	0.578927	0	0	78.291
UNC5C	0.998299	0	0	78.0244
SLC4A4	1.21532	0	0	77.6537
COPG2IT1	0.976866	0	0	77.2377
LINC02133	1.97935	0	0	77.1366
DACH2	1.44653	0	0	76.6208
KCND3	0.831277	0	0	76.3472
WSCD2	2.12189	0	0	76.1673
LINC02687	2.17179	0	0	76.0081
NECAB2	2.84769	0	0	75.8604
ROBO1	0.556871	0	0	75.8047
LSAMP	0.524998	0	0	75.7629
CDH7	2.23752	0	0	75.7512
SCN7A	2.98253	0	0	75.6749
NHS	0.9557	0	0	75.6312
ZMAT4	1.3126	0	0	75.5486
COL26A1	1.08167	0	0	75.4844
LHX1-DT	3.03123	0	0	75.1774
PDE4DIPP2	0.824424	0	0	75.1419
CNGB1	3.3938	0	0	75.1377
MOB3B	1.00322	0	0	75.1102
ZNF608	0.659897	0	0	74.9771
CPNE7	1.75829	0	0	74.968
LINC01563	1.82625	0	0	74.8757
BMPER	1.52684	0	0	74.811
SRRM3	0.681277	0	0	74.4106
JARID2	0.663205	0	0	74.3046
LINC02796	1.19885	0	0	74.2977
JAKMIP2	0.540558	0	0	74.1178
GCNT2	1.47488	0	0	74.0093
ATP1A3	0.730473	0	0	73.9923
IQSEC3	0.940997	0	0	73.9379
CACNA1G	1.07698	0	0	73.6508
CADM1	0.534501	0	0	73.5636
FIGN	1.17652	0	0	73.4861
GRM5	0.672919	0	0	73.4227
SLC35F3	1.01335	0	0	72.9142
RARB	1.23999	0	0	72.8325
PRKD1	0.778633	0	0	72.571
AJAP1	1.11598	0	0	72.5283
LINC01619	1.16092	0	0	72.4713
ENSG00000287694	1.87997	0	0	72.3703
STOX2	0.662413	0	0	72.0103
TMEM266	1.4793	0	0	71.9688
ELAPOR2	1.00042	0	0	71.7255
FSTL4	1.24798	0	0	71.3949
ANK1	1.0387	0	0	71.2363
ENSG00000294456	1.87964	0	0	71.1908
SLC22A15	1.24866	0	0	71.1494
IGSF9B	0.983754	0	0	71.0704
ENSG00000290931	1.49224	0	0	70.8954
GRIK4	0.92572	0	0	70.6655
UBASH3B	0.785889	0	0	70.6376
SLIT2	0.908095	0	0	70.5812
KCNH1	1.20828	0	0	70.5357
CAMK2D	0.762609	0	0	70.5146
ENSG00000286446	0.860939	0	0	70.4344
PLA2R1	2.08405	0	0	70.187
LPA	2.87081	0	0	70.1248
ST8SIA4	1.00784	0	0	70.0332
EDIL3	0.799705	0	0	69.8182
MYO1B	1.13216	0	0	69.7395
TNRC6C	0.541136	0	0	69.5972
CIT	1.15486	0	0	69.4896
LINC01013	1.54422	0	0	69.4885
LRRC4C	0.664504	0	0	69.3825
LINC02337	2.28584	0	0	69.1827
SYT14	0.579443	0	0	68.9021
PTPRM	0.688736	0	0	68.8582
SCN2A	0.644154	0	0	68.7518
GRM4	1.37104	0	0	68.7213
DNER	0.648853	0	0	68.6607
ASTN1	0.494116	0	0	68.6455
MTUS2	0.725711	0	0	68.4019
ENSG00000247121	1.10024	0	0	68.385
ENSG00000291189	1.60051	0	0	68.3513
PPP4R4	2.74723	0	0	68.276
PRKG1	0.680038	0	0	68.1167
ELAVL4	0.755253	0	0	68.0064
GRIN2A	0.955869	0	0	67.876
ADCY8	1.03565	0	0	67.8385
MPP7	1.76107	0	0	67.8112
PTPRN2	0.371776	0	0	67.7261
LINC00869-1	1.48374	0	0	67.6488
ENSG00000287092	1.34885	0	0	67.5737
KIAA1958	0.723296	0	0	67.3822
ZNF704	0.553481	0	0	67.0061
LINC00354	2.15166	0	0	66.9893
CNTN4	0.656315	0	0	66.967
NEK10	0.988705	0	0	66.836
DST	0.400573	0	0	66.7073
JAZF1	0.533952	0	0	66.7022
CPLX2	0.728871	0	0	66.5353
TMEM132E	2.39049	0	0	66.4777
ENSG00000280234	1.33599	0	0	66.3565
FRRS1L	0.827894	0	0	66.1879
DLX5	2.80261	0	0	66.1137
SYT9	1.28021	0	0	66.0875
ARHGAP26	0.877544	0	0	66.0304
ENSG00000215861	1.9128	0	0	66.0292
EML5	0.865953	0	0	65.9972
ENSG00000297941	0.992346	0	0	65.8466
UPP1	2.40757	0	0	65.7607
ENSG00000242593	1.41404	0	0	65.6896
REV3L	0.551516	0	0	65.6078
ENSG00000285982	1.57891	0	0	65.5672
ENSG00000296968	2.69791	0	0	65.5528
HTR2C	2.21945	0	0	65.5503
SAMD12	0.810555	0	0	65.523
NECTIN1	1.04379	0	0	65.4966
CRTAC1	1.60706	0	0	65.3139
LINC00937	1.15279	0	0	65.2433
ST8SIA5-DT	2.74851	0	0	65.1178
ZFR2	0.898776	0	0	65.0712
ENSG00000283674	0.836676	0	0	64.9592
CRACD	0.428929	0	0	64.8885
DLX1	2.66278	0	0	64.7684
IGF1	2.62958	0	0	64.7214
ENSG00000296591	1.35807	0	0	64.6358
KIAA1217	0.78689	0	0	64.6145
KCTD16	0.734827	0	0	64.6045
ATP8A1	0.628263	0	0	64.5823
GABRA1	2.01309	0	0	64.5716
TMEM131L	0.599831	0	0	64.5481
L3MBTL1	0.735542	0	0	64.5444
EBF1	1.18563	0	0	64.4306
RASGRF1	1.17536	0	0	64.347
CIBAR1-DT	1.43471	0	0	64.3264
MBP	1.7509	0	0	64.099
HIVEP3	0.433994	0	0	64.0251
PTPRB	1.5823	0	0	63.9217
GRIN2B	0.489376	0	0	63.8165
SUSD4	0.965371	0	0	63.7105
PCDH9	0.563659	0	0	63.6579
ADAM22	0.654974	0	0	63.6372
BAIAP3	2.13657	0	0	63.6341
ZBTB7C	1.20569	0	0	63.6172
MIAT	0.459808	0	0	63.5358
LUZP2	0.711723	0	0	63.5071
AK5	1.14563	0	0	63.4885
ENSG00000266076	1.2618	0	0	63.4705
ENSG00000228793	1.92784	0	0	63.284
CACNA1B	0.432339	0	0	63.1444
CCDC85A	0.743177	0	0	63.1407
ENTPD3	2.69882	0	0	63.084
LINC00882	0.876664	0	0	63.0259
ST6GALNAC5	0.662328	0	0	63.0242
SLC24A4	2.55866	0	0	63.0139
ZFHX4-AS1	1.49917	0	0	62.9758
UNC13A	0.597809	0	0	62.8656
LINC02223	1.30222	0	0	62.8066
ENSG00000307585	1.43905	0	0	62.6226
ENSG00000291233	1.79415	0	0	62.5002
ARHGAP24	1.60307	0	0	62.495
ENSG00000287083	2.51226	0	0	62.4542
DNMT3A	0.614754	0	0	62.4493
GABRB2	0.819028	0	0	62.3604
BRINP3	0.760008	0	0	62.2948
EPB41L1	0.533342	0	0	62.1155
ARHGAP28	0.917122	0	0	62.1002
FBN1	0.982169	0	0	62.0925
CPEB3	0.592103	0	0	61.9638
RGS8	2.68641	0	0	61.9445
SLC7A14	1.55692	0	0	61.9282
NDST4	1.43436	0	0	61.8647
MGAT5B	0.66639	0	0	61.8014
APBB2	0.601735	0	0	61.6355
GSG1L	1.1597	0	0	61.6257
ODF2L	0.616	0	0	61.6167
KCNA3	1.70299	0	0	61.6114
GABRB3	0.457473	0	0	61.5781
ST8SIA3	2.02075	0	0	61.4922
ENSG00000291034	1.13135	0	0	61.4244
CHRM3	0.735588	0	0	61.3426
ANKRD6	0.83984	0	0	61.2755
SLC6A7	1.86254	0	0	61.2226
KCNQ1OT1	0.511062	0	0	61.2181
SOX2	0.933748	0	0	61.0228
RFTN1	1.35637	0	0	60.9677
ABCA10	1.62255	0	0	60.881
RAB3IP	1.05821	0	0	60.8709
AAK1	0.538428	0	0	60.8495
SUB1	1.06199	0	0	60.7012
RASAL2	0.483973	0	0	60.691
GLYCTK-AS1	2.53927	0	0	60.6063
PCDH7	0.627644	0	0	60.5858
MEG9	2.05692	0	0	60.5556
PPP2R2C	0.661176	0	0	60.5082
CNTNAP1	1.56233	0	0	60.3499
MIR493HG	1.91255	0	0	60.3161
CSRNP3	0.496569	0	0	60.2682
PITPNM3	1.12723	0	0	60.2203
TMTC2	0.616246	0	0	60.0023
ADGRL2	0.641279	0	0	59.9998
GALNT18	0.639223	0	0	59.9155
VWA5B2	3.44302	0	0	59.7566
RASGEF1B	0.618792	0	0	59.596
RAB3B	1.68519	0	0	59.5288
DTNB	0.489551	0	0	59.1592
PNOC	3.55545	0	0	59.0966
ENSG00000298555	1.92368	0	0	59.0886
VAT1L	0.939977	0	0	59.0193
CACNG2-DT	1.71784	0	0	58.9757
SGIP1	0.471692	0	0	58.9008
EYA1	1.49959	0	0	58.7751
BICDL1	0.695018	0	0	58.3749
PNCK	1.40013	0	0	58.3476
EPHA10	1.14528	0	0	58.2624
SH3BP4	1.00272	0	0	58.2483
NOVA1-DT	1.27716	0	0	58.245
FRY	0.50042	0	0	58.1799
CACNG5	2.32687	0	0	58.0815
ENSG00000301682	2.59983	0	0	58.0684
GABRB1	0.642784	0	0	58.0219
JAKMIP3	0.85694	0	0	57.9874
NRG3	0.387343	0	0	57.797
FNBP1	0.484618	0	0	57.6319
SCN8A	0.499702	0	0	57.531
STK32A	1.38053	0	0	57.5103
STXBP5-AS1	1.5942	0	0	57.3944
ANO5	0.896962	0	0	57.3623
LINC01305	2.88435	0	0	57.2913
KIF9-AS1	0.714382	0	0	57.2783
SYT1	0.377696	0	0	57.1455
SORCS2	0.603312	0	0	56.9853
SACS	0.569394	0	0	56.8686
CBFA2T3	0.829669	0	0	56.8628
GLRA3	1.47622	0	0	56.8429
SNPH	0.905106	0	0	56.8269
SUPT3H	0.498883	0	0	56.6623
ALCAM	0.70522	0	0	56.6481
PLA2G4C	1.22513	0	0	56.6134
GRIK3	0.550992	0	0	56.5691
RPS6KA2	0.507596	0	0	56.4165
ENSG00000257545	0.697589	0	0	56.3842
SEZ6L2	0.792368	0	0	56.2211
KCNT1	1.45018	0	0	56.1802
ARID5B	0.891818	0	0	55.9906
HTR1E	1.89584	0	0	55.9406
ENSG00000296481	0.537944	0	0	55.9397
KALRN	0.266698	0	0	55.8644
TMEM130	0.947712	0	0	55.7304
MICAL3	0.371811	0	0	55.6111
AMPH	0.689079	0	0	55.5103
TSHZ1	1.13583	0	0	55.5065
ENSG00000234275	1.25983	0	0	55.4609
MTUS1	0.889735	0	0	55.4286
ARID1B	0.373125	0	0	55.2596
CLEC2L	1.47634	0	0	55.1969
KLHL13	1.0745	0	0	55.1848
TBC1D9	0.68071	0	0	55.0972
TUNAR	1.97915	0	0	55.0194
ZDHHC11B	0.613462	0	0	54.9637
GRIN1	0.628232	0	0	54.9609
TRPC4	1.02501	0	0	54.8507
WNT7A	1.01224	0	0	54.8273
MTMR7	0.538862	0	0	54.734
GPR149	2.07853	0	0	54.7229
LINC01284	1.03652	0	0	54.7144
GAP43	0.539663	0	0	54.6553
NCAM1	0.250748	0	0	54.5727
COBL	1.23273	0	0	54.5588
AKAP9	0.349177	0	0	54.5336
WWP1	0.747502	0	0	54.4377
TTTY14	0.589514	0	0	54.4076
LINC02350	1.18507	0	0	54.3564
PRANCR	0.632106	0	0	54.287
ENSG00000290888	1.50354	0	0	54.1918
CXXC4-AS1	1.17321	0	0	54.1364
LNC-LBCS	1.03856	0	0	54.0766
SYTL5	3.08606	0	0	54.0009
MIR193BHG	2.11669	0	0	53.8549
ENSG00000234026	0.662045	0	0	53.835
ANKRD34C-AS1	2.22152	0	0	53.731
DRD2	1.91444	0	0	53.5552
PLEKHA6	0.554493	0	0	53.5336
SVEP1	1.13108	0	0	53.4755
SCAMP5	0.700475	0	0	53.4386
AKNA	1.0931	0	0	53.4172
GABRA2	0.699442	0	0	53.4142
LHX9	3.0169	0	0	53.3851
ANKRD36BP2-1	1.23699	0	0	53.3564
ENSG00000258603	1.20995	0	0	53.3439
ENSG00000303631	1.13045	0	0	53.3002
ENSG00000291142	0.889812	0	0	53.1893
SCMH1	0.422655	0	0	53.0033
RRN3P2	0.914504	0	0	52.979
DCHS2	1.27832	0	0	52.9548
SLC2A13	0.575805	0	0	52.9291
GABRG2	1.14015	0	0	52.8623
BAHCC1	0.668472	0	0	52.8332
PDE5A	1.24852	0	0	52.8155
MAPT	0.366825	0	0	52.796
PCDH19	0.790822	0	0	52.6868
SLC27A6	1.20033	0	0	52.6845
ZSWIM5	0.461765	0	0	52.6203
CHRNA7	1.02078	0	0	52.3877
DGKZ	0.796429	0	0	52.3864
TRPM2	1.47687	0	0	52.3699
SP9	2.89206	0	0	52.2319
SILC1	0.743061	0	0	52.2238
UNC80	0.637752	0	0	52.2097
LANCL2	0.871773	0	0	52.1558
STEAP1B-AS1	2.74859	0	0	52.1265
ENSG00000304972	3.22234	0	0	51.9966
ENSG00000250349	1.61724	0	0	51.9606
AEBP2	0.538785	0	0	51.9247
TPBGL-AS1	1.83005	0	0	51.8891
ADRA1A	1.85316	0	0	51.8367
CASK	0.383863	0	0	51.8117
ENSG00000258637	2.36595	0	0	51.8107
SYT16	0.504773	0	0	51.774
PDE4A	1.18366	0	0	51.745
FGF13	0.367561	0	0	51.7022
SPNS2	0.957108	0	0	51.6836
SEPTIN6	0.682456	0	0	51.6564
NSG2	0.460844	0	0	51.646
SYN3	0.465834	0	0	51.5934
PPP1R13B	0.625956	0	0	51.535
EBF2	2.55503	0	0	51.508
GUSBP5-1	0.791663	0	0	51.5019
LRRTM3	0.649105	0	0	51.4031
CREG2	2.69763	0	0	51.2579
SYT17	1.02099	0	0	51.248
GREB1L-DT	2.52147	0	0	51.1826
SCGN	2.84236	0	0	51.0584
NEFL	1.50056	0	0	51.0012
FAR2	0.622155	0	0	50.9988
KIAA1328	0.43839	0	0	50.9815
ANKRD7	1.29073	0	0	50.9466
PTPN5	0.631918	0	0	50.9361
NYAP2	0.458176	0	0	50.7871
NPTXR	0.822545	0	0	50.6777
TMEM132C	1.14819	0	0	50.6683
ICA1	0.783362	0	0	50.6337
LINC00623	1.64186	0	0	50.6015
KSR1	0.498989	0	0	50.5313
GLRA1	2.30164	0	0	50.378
ME1	1.31187	0	0	50.3768
SAMD3	0.939107	0	0	50.3752
EMB	2.18745	0	0	50.3464
GRID2	0.471675	0	0	50.3098
ENSG00000304770	1.43707	0	0	50.2304
KCNAB1	0.776404	0	0	50.2194
KRTAP5-AS1	0.794847	0	0	50.2051
RIMKLA	0.982692	0	0	50.2039
DNM1	0.467531	0	0	50.1707
NRP2	0.852693	0	0	50.1544
ENSG00000287625	1.64623	0	0	50.0941
RSPO4	1.85336	0	0	50.0457
KIF17	1.89843	0	0	49.8067
ENSG00000289731	1.5863	0	0	49.7491
ENSG00000304497	0.944438	0	0	49.631
PCOLCE2	1.77628	0	0	49.6297
ENSG00000289201	1.32661	0	0	49.6289
SPTBN4	0.451413	0	0	49.613
RUNDC3B	0.516383	0	0	49.5834
RUNX1T1	0.397607	0	0	49.5797
NRIP3-DT	1.99037	0	0	49.5773
TRANK1	0.713619	0	0	49.5732
FAM168A	0.385247	0	0	49.5597
ESRRG	0.61123	0	0	49.491
TESHL	0.686005	0	0	49.4609
ENSG00000250770	1.6133	0	0	49.44
ENSG00000237626	2.61149	0	0	49.3681
ENSG00000310118	2.68782	0	0	49.3633
ENSG00000259199	1.90159	0	0	49.3305
GNG2	0.461118	0	0	49.3258
SLC9A7	0.758672	0	0	49.2819
PCNX2	0.41246	0	0	49.2674
CALY	1.186	0	0	49.2615
VWA5A	2.68412	0	0	49.1886
ENSG00000285216	0.622641	0	0	49.1439
RNASET2	0.882422	0	0	49.137
INA	0.850317	0	0	49.1019
FBXL17	0.426719	0	0	49.1004
RASSF5	2.45892	0	0	49.0902
NR2F2	1.63737	0	0	49.0575
PRRG1	1.04593	0	0	48.938
CDH2	0.392272	0	0	48.919
TMEM181	0.474211	0	0	48.8299
NUP93	0.520384	0	0	48.8082
OLFM3	0.664062	0	0	48.7477
HECW1	0.341579	0	0	48.6783
ENSG00000302636	1.66807	0	0	48.6023
STAT4	1.66882	0	0	48.5545
ENSG00000259986	0.745262	0	0	48.5309
ENSG00000267506	2.13164	0	0	48.4775
ENSG00000254777	1.21273	0	0	48.468
BEND4	1.92862	0	0	48.4294
LRRC49	0.452901	0	0	48.3708
WDR11-DT	0.781631	0	0	48.3402
ZC3H12C	0.689555	0	0	48.3332
SPTB	0.794038	0	0	48.3056
LRRC8B	0.765422	0	0	48.287
VAV3	1.10407	0	0	48.2665
PRRC2C	0.363845	0	0	48.1639
GALNT9	1.12446	0	0	48.1508
PLXNC1	0.639816	0	0	48.0543
MIR4307HG	1.77716	0	0	48.0031
STYK1	2.06415	0	0	47.9985
BMP3	2.95025	0	0	47.9973
STXBP6	0.991767	0	0	47.9911
MINAR1	1.80405	0	0	47.9828
OTOF	2.20968	0	0	47.9149
CHD6	0.39257	0	0	47.8936
PAX2	3.10434	0	0	47.7999
VSTM5	1.86684	0	0	47.6891
FNDC5	1.8284	0	0	47.646
MEIS1	0.73054	0	0	47.6353
MIR124-2HG	0.490549	0	0	47.5818
ANOS2P	0.637543	0	0	47.4807
JAK2	0.583285	0	0	47.4261
RAPGEF3	1.27604	0	0	47.4141
MID2	1.1854	0	0	47.3768
FAR2P2	1.81174	0	0	47.3307
LIN28B	1.37328	0	0	47.1477
STAC	0.907367	0	0	47.0772
MIR7-3HG	2.39749	0	0	47.0542
FBXO27	0.900283	0	0	46.9671
SATB1-AS1	0.730646	0	0	46.9311
SSH2	0.334083	0	0	46.8365
ENSG00000286749	1.67531	0	0	46.8027
CLSTN3	0.723003	0	0	46.7194
TNRC6A	0.319707	0	0	46.6643
ENSG00000248596	2.42843	0	0	46.5102
SYNE1	0.382377	0	0	46.4157
MYRIP	0.550435	0	0	46.3836
GPI	0.521811	0	0	46.3666
NAV3	0.260329	0	0	46.3298
SNAP25	0.477596	0	0	46.3074
KLHL5	0.601006	0	0	46.2929
PPP3CA	0.369116	0	0	46.2619
NLGN4Y	0.491212	0	0	46.1626
MDGA2	0.425435	0	0	46.1168
LINC01250	0.723523	0	0	46.0812
ENSG00000279249	1.96705	0	0	46.0685
NOS1	1.44032	0	0	46.036
TLE2	0.994489	0	0	45.8618
ARHGAP12	0.660596	0	0	45.8366
ERO1B	0.753653	0	0	45.7758
SIPA1L2	0.491104	0	0	45.6884
RXRA	0.803761	0	0	45.6798
BDNF	1.50929	0	0	45.644
ANKIB1	0.376316	0	0	45.6378
ENSG00000305887	1.54208	0	0	45.618
LINC01933	1.35093	0	0	45.5663
PXDC1	1.48109	0	0	45.5542
PDE8A	0.670595	0	0	45.5534
SMPD3	0.432155	0	0	45.5489
ST7	0.377196	0	0	45.4876
INHBA-AS1	2.20381	0	0	45.4702
SNAP91	0.351208	0	0	45.4022
CADM3	0.473235	0	0	45.3836
PCLO	0.348351	0	0	45.3769
GRID1	0.366468	0	0	45.3266
C4orf50	0.787655	0	0	45.2878
PDE1B	1.57477	0	0	45.1769
FBXO38-DT	0.471749	0	0	45.17
ARHGAP22	1.20275	0	0	45.1623
LINC02136	2.79107	0	0	45.1595
ENSG00000253583	2.08174	0	0	45.1228
RIC8B	0.524602	0	0	45.0712
LHFPL4	0.443679	0	0	45.0506
ENTREP2	0.49324	0	0	45.0201
ENSG00000226939	2.65771	0	0	44.9393
GJD2-DT	3.13434	0	0	44.9382
LINC01945	1.12713	0	0	44.9023
ADAMTS18	2.00291	0	0	44.871
CRB1	0.616964	0	0	44.8399
ENSG00000303989	1.62954	0	0	44.8308
ENSG00000305855	3.25975	0	0	44.7781
LINC02516	1.05306	0	0	44.7667
APC	0.372793	0	0	44.7371
BACH1	0.448026	0	0	44.674
ITGA8	1.69242	0	0	44.605
KCNB1	0.592192	0	0	44.5833
NR2F1-AS1	0.415242	0	0	44.4793
VWA5B1	1.63599	0	0	44.4784
ZNF815P	0.878547	0	0	44.4435
TSC22D1-AS1	0.691583	0	0	44.436
ENSG00000284633	2.33758	0	0	44.4204
MROH1	0.502473	0	0	44.3454
ENSG00000250049	1.61882	0	0	44.2105
USP9Y	0.502311	0	0	44.1946
SYT7	0.573474	0	0	44.0826
OLFM1	0.805637	0	0	44.0371
ENSG00000226149	1.13163	0	0	44.0247
MAST2	0.343423	0	0	44.0122
THSD4	0.796999	0	0	43.9616
ANKRD30B	1.72901	0	0	43.9565
SLC16A10	0.904532	0	0	43.9386
POU2F2	0.42665	0	0	43.9368
KCNK3	1.28759	0	0	43.9361
ENSG00000241231	1.79759	0	0	43.9165
ENSG00000285570	1.76172	0	0	43.8963
SIDT1	1.63225	0	0	43.8045
LRCH2	0.537846	0	0	43.7724
RANBP17	0.44434	0	0	43.7311
HSDL2-AS1	1.02964	0	0	43.7218
AP1G2	0.831732	0	0	43.7177
LINC02691	1.98399	0	0	43.7128
ONECUT1	3.1556	0	0	43.6947
ADAM19	0.573632	0	0	43.666
ENSG00000286121	1.88732	0	0	43.6094
LANCL3	2.85646	0	0	43.6078
PURG	0.594411	0	0	43.5984
ENSG00000303689	1.48244	0	0	43.5892
MAP3K21	0.976311	0	0	43.5835
CDH22	0.678481	0	0	43.4993
CDC42BPA	0.31362	0	0	43.3901
ENSG00000290700	2.72602	0	0	43.2913
NETO1-DT	1.89288	0	0	43.2912
KIF2A	0.418608	0	0	43.2384
ENSG00000296642	0.634693	0	0	43.2335
BMAL2	0.684115	0	0	43.2309
KCNH4	2.08612	0	0	43.2297
LRRN1	0.55547	0	0	43.2231
SLC32A1	3.09697	0	0	43.198
ANKRD50	0.612789	0	0	43.1287
NTRK2	0.404696	0	0	43.1017
PTPRN	0.829872	0	0	43.0975
ECI2-DT	1.31083	0	0	43.0565
CYP46A1	0.888665	0	0	43.0202
RAB11FIP4	0.441954	0	0	42.9994
LGI1	0.952397	0	0	42.9865
FAM169A	0.657155	0	0	42.9601
CSMD1	0.359999	0	0	42.9528
RAPGEF6	0.414906	0	0	42.936
ANKRD30BL	0.411764	0	0	42.9318
NEBL	0.461493	0	0	42.8728
UBAP1L	0.768561	0	0	42.8442
LINGO3	1.98467	0	0	42.8077
DLX2	2.85573	0	0	42.7879
SLCO6A1	2.19378	0	0	42.7649
ENSG00000258663	1.2585	0	0	42.7639
SPANXA2-OT1	0.638896	0	0	42.7409
GABRA3	0.586947	0	0	42.7281
DNAJC6	0.483432	0	0	42.6826
DRP2	1.14769	0	0	42.6647
CEP112	0.472423	0	0	42.6586
PRLR	1.16562	0	0	42.5494
LINC01030	0.851425	0	0	42.5277
SLC38A4-AS1	0.639897	0	0	42.521
NRXN1	0.209258	0	0	42.5043
TTC39A	2.57836	0	0	42.5042
RTN3	0.317691	0	0	42.4904
KCNJ6	0.444674	0	0	42.4693
ENSG00000286593	1.84835	0	0	42.4523
ENSG00000228566	0.952874	0	0	42.4115
PCBP4	0.56594	0	0	42.386
THSD4-AS1	1.15156	0	0	42.3834
ENSG00000305480	0.906021	0	0	42.3081
ENSG00000287292	1.2322	0	0	42.2471
PRKAR1B	0.413829	0	0	42.2149
JPH4	0.490841	0	0	42.1916
SEMA6A	0.444753	0	0	42.1406
ENSG00000294967	2.9696	0	0	42.1107
TTC7A	0.578462	0	0	42.075
CELF5	0.334939	0	0	42.0615
LINC00513	1.60891	0	0	41.9968
DLX6	2.62095	0	0	41.9965
TTLL11	0.380202	0	0	41.9663
ATP8A2	0.329958	0	0	41.9154
IGDCC4	0.709579	0	0	41.8923
REEP1	0.359311	0	0	41.8833
RIN2	0.479235	0	0	41.865
ENSG00000261786	1.81854	0	0	41.8616
MACROH2A2	0.517465	0	0	41.8311
LMX1B	2.85893	0	0	41.7797
ENSG00000290588	1.47026	0	0	41.7475
GPR158	0.595519	0	0	41.7185
ATP9A	0.332686	0	0	41.7085
CDH18	0.510075	0	0	41.7066
CD27-AS1	1.22194	0	0	41.5913
DGKI	0.342632	0	0	41.5763
SEMA5A	0.636075	0	0	41.565
GRM5P1	1.06302	0	0	41.4797
CFAP221	1.11939	0	0	41.474
NIPAL3	0.996365	0	0	41.4538
SCN3A	0.337869	0	0	41.3951
ENSG00000253642	1.42739	0	0	41.3167
HTR7	1.12967	0	0	41.2936
RHOXF1	0.786893	0	0	41.2541
FRMPD3	0.627756	0	0	41.2293
ENSG00000286353	1.57461	0	0	41.1389
HIPK2	0.369873	0	0	41.1383
ENSG00000286125	0.555132	0	0	41.1211
ENSG00000285454	1.67627	0	0	41.1162
FNDC3A	0.365731	0	0	41.1119
ARHGEF12	0.345677	0	0	41.1012
LIPA	0.552533	0	0	41.0241
GALNT13	0.432657	0	0	40.972
CMIP	0.269681	0	0	40.9716
KCNMA1	0.369675	0	0	40.9039
PGBD5	0.456695	0	0	40.8567
ITGA3	0.691291	0	0	40.8437
ANKRD18B	2.41462	0	0	40.8242
KCNJ3	0.552388	0	0	40.8115
ENSG00000298511	1.29323	0	0	40.6553
NALF1	0.267381	0	0	40.6442
ACKR3	1.94933	0	0	40.6101
FLT3	1.53781	0	0	40.5777
ANKRD36BP2	1.23695	0	0	40.5275
CLEC16A	0.384901	0	0	40.4994
CTNNB1	0.483806	0	0	40.4985
BBS9	0.331419	0	0	40.4558
ENSG00000299322	0.862301	0	0	40.42
MYO3B	1.67027	0	0	40.361
MEF2A	0.368447	0	0	40.288
SEM1	0.46305	0	0	40.2876
DLEU7	0.554823	0	0	40.2802
TSPYL2	0.941113	0	0	40.2445
SLC35G2	0.870206	0	0	40.1873
AP1S3	0.827066	0	0	40.1753
ZC3H12B	0.334961	0	0	40.1473
LPIN1	0.542629	0	0	40.1062
SCN3B	0.446192	0	0	40.0892
SGSM1	0.424863	0	0	40.0479
STAT5B	0.443575	0	0	40.0264
RIMS4	0.773392	0	0	40.0199
PDE11A	1.49579	0	0	40.0116
ENSG00000299281	1.6257	0	0	39.9819
ENSG00000306268	3.36552	0	0	39.9642
GALNT8	0.4126	0	0	39.9601
ARHGEF11	0.3402	0	0	39.8103
CAMK1G	1.70096	0	0	39.8062
JPH3	0.47476	0	0	39.787
OSBPL8	0.338012	0	0	39.7812
GAS2	0.81533	0	0	39.7672
ENSG00000287045	0.589822	0	0	39.7657
KIFC2	0.572795	0	0	39.7003
RERE	0.212745	0	0	39.689
ENSG00000291112	1.06317	0	0	39.6812
RGS12	0.322396	0	0	39.6585
FAM238C-1	1.41239	0	0	39.6426
NEK1	0.383906	0	0	39.6123
ENSG00000260848	2.97977	0	0	39.6053
SNX10	0.716169	0	0	39.5606
RGMB	0.947046	0	0	39.4294
ACHE	1.62151	0	0	39.4239
RNF152	0.597462	0	0	39.3996
LINC02125	1.70948	0	0	39.3386
SLITRK3	1.69761	0	0	39.3014
NELFA	0.452394	0	0	39.3001
NLGN4X	0.358162	0	0	39.2717
SLC5A7	3.07173	0	0	39.2588
ENSG00000225339	1.36656	0	0	39.2573
RCAN3	1.21883	0	0	39.1925
RGS17	0.416855	0	0	39.1802
COG6	0.491347	0	0	39.1714
TBC1D5	0.31691	0	0	39.1612
ENSG00000290775	1.46641	0	0	39.1561
LINC01170	0.971568	0	0	39.1363
CDK17	0.477625	0	0	39.1178
ENSG00000286084	1.0585	0	0	39.0636
WDR74	0.583676	0	0	38.9736
GNAL	0.428773	0	0	38.9639
ENSG00000302828	1.69906	0	0	38.9471
GPRASP1	0.623092	0	0	38.9419
PPIP5K2	0.381147	0	0	38.8932
SYN2	0.385481	0	0	38.8764
ENSG00000287042	0.347295	0	0	38.8639
ENSG00000226239	1.90437	0	0	38.8412
ENSG00000239381	1.30879	0	0	38.8408
ENSG00000298285	1.01819	0	0	38.8084
ENSG00000225689	0.357371	0	0	38.7906
PDIA2	1.01453	0	0	38.7714
NNAT	0.569379	0	0	38.7462
DGKG	0.811473	0	0	38.701
ENSG00000297930	1.04389	0	0	38.6512
LRRC28	0.521739	0	0	38.6258
COPB2-DT	0.38402	0	0	38.6157
RDX	0.444796	0	0	38.5171
CHGB	0.87267	0	0	38.5029
ZHX2	0.410011	0	0	38.4819
FLRT1	0.501367	0	0	38.4512
COL25A1	0.593037	0	0	38.4471
ABCA6	1.66583	0	0	38.4451
SV2B	0.808701	0	0	38.4095
RIC3	0.588658	0	0	38.3907
EVL	0.272233	0	0	38.3812
SYT5	0.640491	0	0	38.3754
RARA	1.229	0	0	38.3707
ENPP7P8	1.8903	0	0	38.3489
CAMKMT	0.510235	0	0	38.3149
PRUNE2	0.641233	0	0	38.2719
MRAP2	1.40056	0	0	38.2056
OLA1	0.414189	0	0	38.1805
PATJ	0.312719	0	0	38.1616
COL4A3	1.90372	0	0	38.1282
VSNL1	0.588661	0	0	38.124
ENSG00000261227	2.27328	0	0	38.1185
SLC8A3	0.41744	0	0	38.0775
SLC41A2	0.431978	0	0	38.077
TNKS	0.300259	0	0	38.0019
B3GLCT	0.905139	0	0	37.9588
C1QTNF3-AMACR	0.401281	0	0	37.7618
TAFA4	2.01076	0	0	37.7322
ENSG00000297455	1.45713	0	0	37.693
PEG10	0.876583	0	0	37.6686
DNMT3B	0.75387	0	7.36087e-308	37.633
C17orf100	1.42779	0	1.26172e-307	37.6249
MAGED1	0.398946	0	1.06021e-307	37.6213
EXOC6B	0.238177	0	2.12559e-307	37.6031
TRHDE-AS1	2.14837	4.36618e-308	6.78898e-307	37.5913
LRRC36	1.54727	5.57425e-308	8.66155e-307	37.5731
NIPAL2	1.42815	8.92432e-307	1.3839e-305	37.4991
ENSG00000287972	1.67698	2.89551e-306	4.48404e-305	37.4731
AP3B2	0.338292	5.35152e-306	8.28189e-305	37.4427
GNAQ	0.279878	5.52072e-306	8.538e-305	37.4419
RASGRP2	0.965551	9.54959e-306	1.47589e-304	37.4305
ENSG00000308193	1.46693	1.4224e-305	2.19389e-304	37.4262
LINC01512	1.91747	1.8364e-305	2.83055e-304	37.4251
PKNOX2	0.363039	1.11385e-305	1.72029e-304	37.4231
LPCAT4	0.603448	6.911e-305	1.06452e-303	37.3748
ARHGEF28	0.818819	9.08401e-305	1.39829e-303	37.3692
FAM13C	0.483259	1.07515e-304	1.65386e-303	37.3624
SMIM17	0.755896	6.61982e-304	1.01491e-302	37.3149
CCDC18-AS1	0.512123	1.41885e-303	2.17383e-302	37.2931
LINC02487	1.48158	1.84578e-302	2.8223e-301	37.2357
ARHGEF4	0.636152	5.84411e-301	8.9241e-300	37.1308
ENSG00000301665	2.82888	1.87147e-300	2.85399e-299	37.1278
LRBA	0.417603	6.80902e-301	1.03906e-299	37.1261
CPNE9	1.85179	1.95941e-300	2.98612e-299	37.1112
GRM1	0.540668	3.46894e-300	5.27964e-299	37.0827
ENSG00000290410	1.02262	1.52351e-299	2.31567e-298	37.046
MPP2	0.605499	3.26504e-299	4.95945e-298	37.0219
ENSG00000255367	1.23773	6.05328e-299	9.18859e-298	37.0117
KIAA0825	0.35681	4.57315e-298	6.92356e-297	36.9494
GPC5	0.535734	1.19022e-297	1.80076e-296	36.9241
COL7A1	1.1917	2.11163e-297	3.19061e-296	36.9131
TMEM255A	1.84444	3.11722e-297	4.70385e-296	36.9131
ENSG00000286072	1.41172	2.83694e-297	4.28373e-296	36.9098
ABLIM1	0.359364	1.78524e-296	2.68862e-295	36.8497
ENSG00000302408	1.52405	1.56336e-295	2.3483e-294	36.7997
PLXDC1	0.938436	1.18312e-295	1.78065e-294	36.7995
ENSG00000253214	2.37129	2.62023e-295	3.93068e-294	36.7988
GPHN	0.232688	1.50019e-295	2.25637e-294	36.792
CASKIN1	0.614858	1.56268e-295	2.3483e-294	36.7913
KLF2-DT	1.10731	5.35992e-295	8.03534e-294	36.7614
PTCHD1-AS	0.566228	8.96446e-295	1.34303e-293	36.7435
TLL1	1.23461	1.31824e-294	1.97239e-293	36.7411
CNNM1	0.823102	1.09552e-294	1.64021e-293	36.7395
CDH13	0.398291	9.43509e-294	1.40987e-292	36.6784
LINC03036	1.25196	6.44968e-293	9.63138e-292	36.6321
RGS9	0.763803	6.69611e-293	9.99289e-292	36.6263
ENSG00000285713	0.490137	8.21544e-293	1.22523e-291	36.6193
ENSG00000309263	2.30848	2.94106e-292	4.38338e-291	36.6034
SFTA3-1	1.93761	1.10283e-291	1.64048e-290	36.5637
HCN1	0.414479	6.57873e-292	9.79864e-291	36.5622
FCHSD2	0.281961	8.39267e-292	1.24923e-290	36.5554
IFNLR1	2.71799	1.54087e-290	2.28911e-289	36.4993
PRKCB	0.464029	2.93073e-290	4.35106e-289	36.4578
ESYT3	2.07799	7.03638e-290	1.04397e-288	36.4488
DGCR5	0.313467	1.41623e-289	2.09988e-288	36.4141
ENSG00000257894	0.893755	1.65384e-289	2.44902e-288	36.4137
KLF7	0.312122	1.56408e-289	2.3176e-288	36.4113
ABCC8	0.636022	2.67692e-289	3.96146e-288	36.3975
TXNRD3	0.583169	9.37293e-289	1.38528e-287	36.3626
EDIL3-DT	1.12039	3.34848e-288	4.94574e-287	36.3317
PTPRG	0.328594	5.92134e-288	8.73464e-287	36.3109
ENSG00000286716	1.82833	4.06707e-287	5.98403e-286	36.2719
ENSG00000257759	0.591481	2.77998e-287	4.0929e-286	36.2689
BIN1	0.575055	2.96712e-286	4.36006e-285	36.2029
PGM5P2-1	0.293121	1.96392e-285	2.88038e-284	36.1501
SHISA7	0.61043	4.99091e-285	7.30592e-284	36.125
STMN2	0.311296	2.36597e-283	3.45681e-282	36.0167
TACR1	1.19892	3.1534e-282	4.59852e-281	35.9516
THSD7A	0.355578	2.83724e-282	4.1401e-281	35.9473
COL4A4	1.86189	8.17045e-282	1.19072e-280	35.931
PXYLP1	0.518741	2.21028e-281	3.21912e-280	35.8904
MYT1	0.400989	2.56487e-281	3.73319e-280	35.8858
AFAP1	0.329677	1.25896e-280	1.83127e-279	35.8412
TSPAN7	0.427056	2.09863e-280	3.05071e-279	35.827
MTCL1	0.378273	3.68945e-280	5.35984e-279	35.8111
ENSG00000295554	0.538113	3.75626e-280	5.45345e-279	35.811
LINC01470	1.11876	6.82515e-280	9.89023e-279	35.7999
MAP7	0.645915	6.59423e-280	9.56164e-279	35.7958
AATK	0.49855	2.32502e-279	3.36704e-278	35.7597
RFX7	0.289311	5.22263e-279	7.55376e-278	35.7367
FMNL1-DT	1.03047	6.97762e-279	1.00858e-277	35.7316
BLTP3A	0.635489	1.00746e-278	1.4544e-277	35.7192
SYT12	2.08224	1.74826e-278	2.52068e-277	35.7174
ADARB2-AS1	2.63568	2.02503e-277	2.90697e-276	35.6566
C2CD5	0.337361	1.20066e-277	1.7268e-276	35.6485
KAT2B	0.576818	1.47981e-277	2.12695e-276	35.643
BEND5	0.587042	1.74072e-277	2.5004e-276	35.6387
TRPC6	1.07776	3.54319e-277	5.08314e-276	35.6221
HAP1	2.69716	3.57112e-276	5.10728e-275	35.5745
CCDST	0.503346	2.13492e-276	3.05899e-275	35.5677
RIPK1	0.760543	2.64731e-276	3.7908e-275	35.5628
ZNF483	0.72561	2.65794e-276	3.80365e-275	35.5626
GALNT7	0.615942	4.19696e-276	5.9986e-275	35.5493
BMERB1	0.306221	4.24916e-276	6.06944e-275	35.5479
MAML3	0.328	1.42062e-275	2.02416e-274	35.5138
ABCC5	0.378444	3.44166e-275	4.89776e-274	35.4888
MYO18A	0.381718	4.65175e-275	6.61573e-274	35.4802
PPARGC1B	1.17825	4.59637e-274	6.52083e-273	35.4197
ARMC2	0.409992	4.09274e-274	5.80992e-273	35.4187
ENSG00000301899	1.17424	8.53755e-274	1.21047e-272	35.4026
MAN1A1	0.708416	3.95876e-273	5.60588e-272	35.3562
PTPN3	1.0251	9.72218e-273	1.37504e-271	35.3329
MAP7D1	0.490681	1.54125e-272	2.17582e-271	35.3159
ASL	0.913823	3.0253e-272	4.26565e-271	35.2986
FAM78B	0.457177	3.29318e-272	4.64052e-271	35.2942
ENSG00000249319	0.906674	1.31127e-271	1.84435e-270	35.2569
GFRA1	0.840125	5.54736e-271	7.79784e-270	35.2167
TTLL9	0.722805	2.17342e-270	3.05327e-269	35.1758
BTBD3	0.683327	2.70362e-270	3.7958e-269	35.1697
ENSG00000283415	0.827974	5.91203e-270	8.28008e-269	35.1481
LGI4	0.7531	1.3081e-269	1.82983e-268	35.1251
SYN1	0.815379	2.34682e-269	3.28084e-268	35.1085
ATOSA	0.461618	8.60984e-269	1.20292e-267	35.0699
N4BP2	0.396478	1.8194e-268	2.5358e-267	35.0481
ENSG00000235538	2.07724	7.08244e-267	9.85926e-266	34.9623
ENSG00000284606	0.963125	3.5089e-266	4.87873e-265	34.8999
MAST1	0.306289	9.81088e-266	1.36327e-264	34.8674
ATCAY	0.349226	1.22905e-265	1.70679e-264	34.8609
EEA1	0.395084	1.27492e-265	1.76942e-264	34.8599
MMP24	0.468046	1.68061e-264	2.32965e-263	34.7857
LINC00609	0.794371	1.92064e-264	2.66079e-263	34.7828
GABRG1	1.21512	3.53109e-264	4.88595e-263	34.7701
SYNPO2	1.27944	4.83239e-264	6.68253e-263	34.7599
ENSG00000223838	1.49871	1.14661e-263	1.5837e-262	34.738
ABTB2	0.504434	9.21429e-264	1.27344e-262	34.7365
ANKRD20A7P	0.916548	1.47464e-263	2.03556e-262	34.725
TAC1	2.7948	7.85319e-263	1.08208e-261	34.6964
ENSG00000248884	1.33519	4.92402e-263	6.78884e-262	34.6949
CEP290	0.299801	4.22657e-263	5.83074e-262	34.6923
ENSG00000253832	2.54014	9.35752e-263	1.28859e-261	34.6886
TLCD4	1.03917	1.09612e-262	1.50853e-261	34.6682
GABBR2	0.311274	1.54859e-262	2.12996e-261	34.6547
BTG1	0.998336	3.01378e-262	4.14273e-261	34.6393
PFKP	0.444487	3.33668e-262	4.58385e-261	34.6327
PRRT4	1.29218	4.09382e-262	5.62063e-261	34.6321
EHBP1	0.254337	1.34052e-261	1.83829e-260	34.5923
TRIM71	1.00057	3.39921e-261	4.65584e-260	34.5684
IMPG2	0.916392	3.89933e-261	5.33767e-260	34.5637
RAP1GAP	0.521581	5.29315e-261	7.24132e-260	34.5526
KCNJ5	2.55075	1.6399e-259	2.23683e-258	34.4704
ARHGAP18	0.621625	1.13863e-258	1.55217e-257	34.3966
B4GALNT3	0.65613	1.88359e-258	2.56617e-257	34.3821
ADAMTS5	1.64088	2.69938e-258	3.67106e-257	34.3808
MMP2	1.79731	4.38196e-258	5.95579e-257	34.3682
GNAS	0.363116	1.29498e-257	1.75905e-256	34.3249
CDK8	0.35	1.35502e-257	1.83952e-256	34.3235
ENPP7P1	1.10547	2.38479e-257	3.23558e-256	34.3109
ONECUT2	1.12925	2.86983e-257	3.88907e-256	34.3059
ENSG00000258394	1.10764	4.06485e-257	5.50527e-256	34.2954
SCG2	1.46573	3.45087e-255	4.65999e-254	34.1688
ENSG00000274422	0.315432	2.7209e-255	3.68074e-254	34.1681
INTS4P2	1.22304	4.97794e-255	6.71817e-254	34.1549
LINC02092	2.59903	9.2611e-255	1.24913e-253	34.1529
ENSG00000259048	1.70179	1.69861e-254	2.28974e-253	34.1249
ENSG00000287032	0.68792	2.45235e-254	3.30192e-253	34.1048
TMEM117	0.476244	2.38115e-254	3.20792e-253	34.1046
ABCA7	0.998319	1.6815e-253	2.2627e-252	34.0493
GAS2L3	0.733218	1.93987e-253	2.60884e-252	34.0439
ENSG00000283183	0.604224	4.51898e-253	6.07382e-252	34.0183
SLCO5A1	0.34254	3.6043e-252	4.8416e-251	33.9563
DNAH6	0.556965	4.92775e-252	6.6155e-251	33.9474
EPDR1	0.993892	5.73522e-252	7.69503e-251	33.9453
PACSIN1	0.841135	2.54481e-251	3.40844e-250	33.9001
POU2F1	0.291109	3.0677e-251	4.1064e-250	33.8929
PCDH10	0.541876	1.21776e-250	1.62913e-249	33.8526
NOVA1	0.334493	1.63355e-250	2.18284e-249	33.8435
ENSG00000285579	0.801841	3.69197e-250	4.93055e-249	33.8207
PLCH2	0.768733	4.27497e-249	5.69591e-248	33.7478
FTO	0.268127	7.66151e-249	1.01963e-247	33.7291
DKK2	0.951508	1.1694e-248	1.55359e-247	33.7194
PDS5B	0.283478	1.09059e-248	1.44973e-247	33.7186
GABRA6	1.46828	1.80769e-248	2.39881e-247	33.7107
CC2D1A	0.504669	2.58108e-248	3.42313e-247	33.6932
CDS1	0.97049	2.97152e-248	3.93868e-247	33.6912
ENSG00000258662	2.95489	7.69581e-248	1.01889e-246	33.6823
GPC6	0.304342	4.10732e-248	5.44101e-247	33.6791
ENSG00000286860	3.29101	3.82368e-247	5.05073e-246	33.6369
NCOA2	0.285633	2.44995e-247	3.23988e-246	33.6258
NRIP3	1.26837	3.19657e-247	4.2248e-246	33.6233
NDRG4	0.414614	8.14954e-247	1.07586e-245	33.59
NNMT	1.9518	2.45918e-246	3.24091e-245	33.5693
ENSG00000227863	1.47071	2.76942e-246	3.64767e-245	33.5607
DPF3	0.481233	3.70634e-246	4.87613e-245	33.5449
PTPRT-DT	1.79828	6.08213e-245	7.96531e-244	33.471
MAP7D2	0.544103	4.73933e-245	6.21737e-244	33.4687
IQCH	0.908235	5.51642e-245	7.22855e-244	33.466
PECR	0.517257	1.53951e-243	2.01045e-242	33.3641
SOX1	1.18946	1.88374e-243	2.4586e-242	33.3625
OSBPL9	0.326169	1.91166e-243	2.49362e-242	33.3573
SLC5A4-AS1	0.628252	2.19167e-243	2.85725e-242	33.3541
USP33	0.316213	4.81185e-243	6.26958e-242	33.3295
RIMBP2	0.292896	5.11486e-243	6.66062e-242	33.3278
SCAI	0.304142	8.45932e-243	1.10096e-241	33.3125
DZIP3	0.368559	1.14218e-242	1.48483e-241	33.3035
JAKMIP1	0.348902	2.49577e-242	3.24083e-241	33.2799
SLC26A8	1.03265	3.34716e-242	4.34149e-241	33.274
ANKRD12	0.249925	3.21701e-242	4.17503e-241	33.2723
CD55	1.38251	3.83845e-242	4.97031e-241	33.2721
MAPRE3	0.464267	3.79121e-242	4.91469e-241	33.2675
DOP1A	0.309913	3.79765e-242	4.92026e-241	33.2672
CNTNAP5-DT	1.79638	8.25452e-242	1.06766e-240	33.2535
LINC01201	1.95168	1.01952e-241	1.31792e-240	33.2492
COL18A1	0.895034	1.57246e-241	2.03043e-240	33.2259
UBR3	0.287833	1.55319e-241	2.00667e-240	33.2247
PCDH1	0.614543	1.26358e-240	1.63067e-239	33.162
ATP13A3-DT	0.584083	2.53666e-240	3.26811e-239	33.1408
HOOK1	0.863575	3.69788e-240	4.75883e-239	33.1307
ADCY5	0.323578	5.93739e-240	7.63232e-239	33.1145
SPOCK1	0.307612	1.09451e-239	1.40616e-238	33.096
SRCIN1	0.285248	1.47524e-239	1.8932e-238	33.0869
LINC03124	0.657593	1.83886e-239	2.35852e-238	33.0808
MINDY2	0.420097	3.84091e-239	4.92361e-238	33.058
ENPP7P10	1.59621	5.34082e-239	6.8425e-238	33.0568
GRM3-AS1	0.959815	8.63817e-239	1.10608e-237	33.0362
VPS13B	0.264683	1.2462e-238	1.59482e-237	33.0222
DISC1FP1	1.07571	2.05435e-238	2.62612e-237	33.011
ATP8B4	1.00616	1.99188e-238	2.54768e-237	33.0095
FGF9	0.635885	3.31222e-238	4.22938e-237	32.9933
ARL4C	0.913543	6.4408e-238	8.21515e-237	32.9747
B3GALT5	0.780399	8.30085e-238	1.05642e-236	32.9658
TTN-AS1	0.378812	8.72299e-238	1.10953e-236	32.963
PAK1	0.348107	8.96901e-238	1.14019e-236	32.9621
POLR3B	0.610553	4.01269e-237	5.09834e-236	32.9172
PRORSD1P-1	0.857437	4.87996e-237	6.19683e-236	32.9128
ENSG00000290853	0.610693	5.0535e-237	6.41365e-236	32.9102
SYNM-AS1	0.901466	1.48363e-236	1.87983e-235	32.879
DMXL2	0.317208	1.46995e-236	1.86353e-235	32.8769
MT-RNR2	0.399757	1.62971e-236	2.06379e-235	32.8742
EPHA8	1.26689	3.32297e-236	4.20574e-235	32.856
TOX3	0.324463	4.54058e-236	5.7405e-235	32.8425
SLC1A1	0.386468	9.45532e-236	1.19475e-234	32.8201
SV2A	0.541568	1.15479e-235	1.45836e-234	32.8143
LINC01902	1.28066	2.90574e-235	3.66757e-234	32.791
ENSG00000283235	1.86987	3.97665e-235	5.01102e-234	32.7853
ENSG00000261722	3.3018	6.83756e-235	8.61136e-234	32.7824
TPPP	0.682231	3.40018e-235	4.2893e-234	32.7817
ENSG00000282804	2.33835	1.71104e-234	2.15374e-233	32.7466
SH3GLB1	0.526408	4.2548e-234	5.34687e-233	32.704
DOCK3	0.199011	5.43798e-234	6.82627e-233	32.6962
HTR4	1.49469	1.98103e-233	2.48406e-232	32.6629
KCNC3	0.611315	3.53607e-233	4.43156e-232	32.6391
CCNJL	0.854879	4.62184e-232	5.77969e-231	32.5613
ENSG00000225208	1.6006	2.79812e-231	3.4953e-230	32.5116
CPLANE1	0.299147	4.53798e-231	5.6625e-230	32.4889
MAP1A	0.694324	6.84546e-231	8.53715e-230	32.4772
ADAMTS2	0.974401	1.71802e-230	2.14027e-229	32.4504
LINC02182	0.88011	2.32209e-230	2.88967e-229	32.4401
ENSG00000291099	0.882341	2.80404e-230	3.48754e-229	32.4344
LINC00620	1.68419	5.3633e-230	6.66701e-229	32.4211
ENSG00000250075	0.72509	1.13506e-229	1.40945e-228	32.3906
GFRA2	0.508182	1.77569e-229	2.20376e-228	32.3759
LINC02731	1.38346	2.25772e-229	2.80048e-228	32.3734
GDAP1L1	0.424632	2.43694e-229	3.02115e-228	32.3658
SPG11	0.36103	2.53825e-229	3.14505e-228	32.3644
ENSG00000295970	1.28654	3.56396e-229	4.41359e-228	32.3589
FAT1	0.689554	6.42448e-229	7.95177e-228	32.3367
CLVS2	0.392251	1.68488e-228	2.08318e-227	32.3058
LRRFIP1	0.274603	1.92301e-228	2.37632e-227	32.3016
MT-RNR1	0.412431	2.16858e-228	2.67834e-227	32.2983
HMCN2	1.94869	3.98618e-228	4.92057e-227	32.2903
PAX5	2.19762	9.559e-228	1.17744e-226	32.2679
MIR124-1HG	0.307758	5.86178e-228	7.22806e-227	32.2669
MAFB	2.48764	1.97117e-227	2.42412e-226	32.2445
ENSG00000303527	1.67046	2.11162e-227	2.59545e-226	32.2358
PWAR1	1.10095	2.26435e-227	2.78169e-226	32.2282
WDR44	0.433146	2.96434e-227	3.63773e-226	32.2167
PNMA3	1.04893	5.50592e-227	6.75305e-226	32.2
ANKRD28	0.293156	1.72011e-226	2.10748e-225	32.1617
SERINC5	0.345283	1.96077e-226	2.40105e-225	32.1577
ENSG00000295782	1.65436	2.24091e-225	2.74118e-224	32.0891
LINC02698	1.42479	2.41668e-225	2.95461e-224	32.0851
HPCAL4	1.04562	3.62573e-225	4.42574e-224	32.0693
BAALC	0.535055	3.5582e-225	4.34561e-224	32.0675
GPR155	0.75696	6.4088e-225	7.81458e-224	32.05
SEMA4A	0.529794	6.98148e-225	8.50838e-224	32.0463
ZNF713	0.382041	1.63802e-224	1.99415e-223	32.0194
PPL	2.01323	2.76844e-224	3.36678e-223	32.0129
TMX4	0.596258	2.18902e-224	2.66353e-223	32.0108
PCP4	1.32035	2.80075e-224	3.40428e-223	32.0075
ANK2	0.164996	3.92014e-224	4.76236e-223	31.9931
ENSG00000297079	0.740305	4.3102e-224	5.23346e-223	31.9901
BSN	0.328421	1.78682e-223	2.16728e-222	31.9444
PCDH17	0.50347	8.24622e-223	9.98622e-222	31.8966
ATP13A2	0.476006	3.23605e-222	3.91475e-221	31.8535
PCDH10-DT	0.935305	3.79595e-222	4.58966e-221	31.8505
PVR	0.537368	4.65867e-222	5.62982e-221	31.8422
SEPTIN7P13-1	0.332769	8.67756e-222	1.04645e-220	31.8222
MAP3K13	0.310884	5.75154e-221	6.92503e-220	31.7626
TENM3-AS1	1.27068	2.73282e-220	3.28524e-219	31.7175
ENSG00000308900	0.364275	3.09343e-220	3.7168e-219	31.7094
TSPOAP1	0.37057	5.85122e-220	7.02666e-219	31.6893
MYO5A	0.250362	1.64547e-219	1.97397e-218	31.6565
ANO2	0.761965	2.03375e-219	2.4381e-218	31.6502
ENSG00000300902	1.57179	2.50311e-219	2.99812e-218	31.6494
MUC20-OT1	0.324308	4.10738e-219	4.91709e-218	31.6275
ENSG00000277701	0.470148	5.79486e-219	6.93364e-218	31.6168
SPEF2	0.628869	9.5052e-219	1.13672e-217	31.6013
ENSG00000250643	1.54371	1.35894e-218	1.62261e-217	31.5962
LINC02293	2.05379	1.58226e-218	1.88829e-217	31.5956
ZIC4	2.02644	4.54837e-218	5.42525e-217	31.5615
CALB1	2.13992	1.85869e-217	2.21473e-216	31.5186
ANKRD26	0.311109	1.58377e-217	1.88813e-216	31.5115
MSH4	0.805991	2.21826e-217	2.64044e-216	31.5021
LINC02488	0.464672	1.22966e-216	1.46294e-215	31.4466
ENSG00000301105	2.19299	2.04623e-216	2.42939e-215	31.4411
CYP4X1	0.996869	1.7744e-216	2.10774e-215	31.4369
LINC00504	0.795899	3.23496e-216	3.83872e-215	31.4168
LMO1	0.816873	4.1522e-216	4.92207e-215	31.4091
RGS11	0.826424	5.5201e-216	6.54022e-215	31.3997
ENSG00000308431	2.13206	7.91165e-216	9.36891e-215	31.3974
SEMA4F	0.55496	9.27423e-216	1.09712e-214	31.3821
C1QTNF2	1.72427	4.69412e-215	5.54446e-214	31.3379
KIF5A	0.323331	6.63085e-215	7.82801e-214	31.3187
SMOC2	0.985445	1.71691e-214	2.02584e-213	31.2908
ADAM7-AS1	0.636823	2.12715e-214	2.50862e-213	31.2824
ENSG00000227579	1.29366	5.00904e-214	5.89523e-213	31.2596
DIPK1A	0.392291	4.64924e-214	5.47738e-213	31.2564
RNLS	0.688421	4.99161e-214	5.87773e-213	31.2549
ATP6V0A1	0.309285	5.23404e-214	6.15689e-213	31.2525
ENSG00000289311	0.500775	5.45637e-214	6.41514e-213	31.2515
MGAT5	0.275624	6.60114e-214	7.7571e-213	31.2451
MAPT-AS1	0.471475	1.26936e-213	1.49088e-212	31.2243
KCNC1	0.430663	1.62438e-213	1.90688e-212	31.2163
CAMK2N1	0.692814	1.75283e-213	2.05663e-212	31.2147
VAX1	2.50627	3.7303e-213	4.37013e-212	31.204
ENSG00000307744	1.43905	2.9328e-213	3.43759e-212	31.2029
GNAO1-DT	0.349932	2.85836e-213	3.35205e-212	31.198
FGD5	1.16947	3.91062e-213	4.57672e-212	31.1908
ENSG00000267922	0.604288	3.8507e-213	4.50889e-212	31.189
MEST	0.660094	4.71366e-213	5.51373e-212	31.1828
ZDHHC11	0.607738	5.70027e-213	6.66442e-212	31.1763
MAD1L1	0.303073	5.80692e-213	6.78566e-212	31.1752
GOLT1A	2.04685	9.79994e-213	1.14459e-211	31.1683
RAPGEF4-AS1	1.90618	1.26143e-212	1.4718e-211	31.159
ZFYVE28	0.479479	1.02263e-212	1.19378e-211	31.1571
LINC01801	1.41429	1.55712e-212	1.81495e-211	31.1491
PSEN2	0.611388	1.99918e-212	2.32903e-211	31.136
FAR2P2-1	1.73123	6.9628e-212	8.09522e-211	31.1023
LPCAT2	1.23459	9.67832e-212	1.12467e-210	31.088
OPTN	0.438521	1.45219e-211	1.68667e-210	31.0716
HPSE2	1.19967	2.07457e-211	2.40833e-210	31.0663
ENSG00000254553	0.692387	6.88404e-211	7.9875e-210	31.0221
CFAP61	0.838173	1.66422e-210	1.92903e-209	30.9938
TVP23A	0.366334	3.41001e-210	3.94864e-209	30.9695
DNAJC27-AS1	0.642458	4.59506e-210	5.3182e-209	30.9606
SHANK1	0.278308	4.96833e-210	5.74732e-209	30.9573
PARM1	1.04888	9.05197e-210	1.0466e-208	30.9408
LINC00842	1.48821	1.85812e-209	2.14622e-208	30.9198
UNC5D	0.269757	1.76357e-209	2.03803e-208	30.9168
ERCC6L2-AS1	0.429485	2.14045e-209	2.47108e-208	30.9101
VGF	1.79461	3.09158e-209	3.56734e-208	30.9057
RNF24	0.2782	5.93656e-209	6.84669e-208	30.8768
FAM133A	1.26529	8.66814e-209	9.99204e-208	30.8685
HSD11B1-AS1	1.56577	1.13598e-208	1.30883e-207	30.8617
LRRC37A3	0.467525	1.59879e-208	1.84113e-207	30.8449
TRAF3IP2-AS1	0.26363	1.80086e-208	2.07279e-207	30.8408
SBF2	0.21061	3.25066e-208	3.73777e-207	30.8217
ENSG00000308110	1.62053	4.34389e-208	4.98734e-207	30.818
PHC2	0.31702	4.39386e-208	5.04219e-207	30.8118
LHFPL5	0.94681	5.92477e-208	6.79561e-207	30.8044
ANKRD36C	0.174652	7.52847e-208	8.62642e-207	30.7946
RABGAP1L	0.22285	2.01828e-207	2.31032e-206	30.7622
LINC00342	0.182516	2.17327e-207	2.4865e-206	30.7599
SPAG16	0.349657	3.73944e-207	4.27628e-206	30.742
CD200	0.424799	3.24196e-206	3.70553e-205	30.6716
ENSG00000285280	0.668703	1.25778e-205	1.43692e-204	30.628
CRHBP	3.09959	2.28187e-205	2.60557e-204	30.6245
MIR3936HG	0.32002	3.23438e-205	3.69137e-204	30.5962
STPG1	1.2841	4.04086e-205	4.60723e-204	30.5924
RNF213-AS1	0.331039	3.70709e-205	4.22877e-204	30.5917
TJP1	0.335939	5.36814e-205	6.11447e-204	30.5796
TCF20	0.246112	5.90592e-205	6.72368e-204	30.5765
DGKA	0.832865	2.63673e-204	2.9959e-203	30.5287
RASGEF1A	0.724024	3.06121e-204	3.47647e-203	30.5233
HMGB1	0.304649	5.22699e-204	5.93312e-203	30.5049
ZNF345	0.350611	2.07804e-203	2.35644e-202	30.4595
DPF1	0.443414	2.71128e-203	3.0715e-202	30.4509
ENSG00000293186	1.26901	4.57988e-203	5.18325e-202	30.4376
TMCC1	0.252175	1.6371e-202	1.84914e-201	30.3915
CLSTN1	0.346374	3.09242e-202	3.48951e-201	30.3705
NHSL2	1.0224	3.99359e-202	4.50199e-201	30.3639
PID1	0.295369	4.19423e-202	4.72585e-201	30.3604
INTS4P1	0.921537	5.49031e-202	6.18319e-201	30.3533
TRMT11	0.356973	1.05378e-201	1.1856e-200	30.33
ONECUT3	2.8131	1.20055e-200	1.3481e-199	30.2667
ANKRD18CP	0.829226	1.28491e-199	1.43861e-198	30.172
RPS6KC1	0.287718	2.24812e-199	2.51337e-198	30.1522
PTBP3	0.391185	2.47292e-199	2.76335e-198	30.1492
ASPHD1	0.52666	2.5461e-199	2.84374e-198	30.1484
ENSG00000286218	2.65945	5.54016e-199	6.18481e-198	30.1358
SLITRK6	2.3058	5.84842e-199	6.52577e-198	30.1309
PLB1	1.34319	7.53612e-199	8.40485e-198	30.1159
SYT13	0.511018	1.3568e-198	1.51175e-197	30.0927
CDK5R2-AS1	1.42975	4.39323e-198	4.88782e-197	30.0581
EPHA4	0.354517	7.15866e-198	7.95688e-197	30.037
RHEX	2.45263	1.32743e-197	1.47331e-196	30.0275
DTX1	0.36527	1.13672e-197	1.26286e-196	30.0215
RASA1	0.272457	1.60044e-197	1.77546e-196	30.0101
ENSG00000264015	1.36248	2.30545e-197	2.55634e-196	30.0023
PLD3	0.317108	2.83992e-197	3.14745e-196	29.9909
TRO	0.503515	4.27771e-197	4.73866e-196	29.9775
SLC9A5	0.878579	1.48182e-196	1.6407e-195	29.937
TRPC7	0.723425	1.70123e-196	1.88273e-195	29.9324
GBX1	2.80183	4.93218e-196	5.45052e-195	29.9113
TPD52L1	1.66702	4.59129e-196	5.07625e-195	29.9041
HERC1	0.201861	5.08517e-196	5.61689e-195	29.8945
ELFN2	0.332047	6.11924e-196	6.75584e-195	29.8881
CNTN1	0.270997	7.46119e-196	8.23345e-195	29.8815
GDNF-AS1	1.34659	1.02516e-195	1.13073e-194	29.875
GSTA4	0.409202	1.45867e-195	1.60811e-194	29.8591
CRNDE	0.928614	1.73911e-195	1.91635e-194	29.8558
KCNS3	1.00465	2.56009e-195	2.8183e-194	29.8423
HFM1	0.409419	5.8129e-195	6.39614e-194	29.8126
PCDHA6	0.275832	8.42762e-195	9.26877e-194	29.8
UBE2E2	0.289947	1.18365e-194	1.30117e-193	29.7886
GNAO1	0.21066	2.16548e-194	2.3782e-193	29.7684
PTGER3	1.38416	3.31392e-194	3.63772e-193	29.7584
GUCY1B1	0.696196	7.39571e-194	8.11059e-193	29.7278
TMEM200A	0.738946	3.06968e-193	3.36319e-192	29.6802
ZNF133	0.32213	5.40523e-193	5.91924e-192	29.6598
DCBLD2	0.350968	6.32261e-193	6.92056e-192	29.6545
TTC3	0.168296	1.29068e-192	1.41207e-191	29.6306
PPM1H	0.557836	2.19715e-192	2.40151e-191	29.6126
LINC02112	0.887082	3.62487e-192	3.95639e-191	29.5973
ANKS1A	0.28832	3.43487e-192	3.75257e-191	29.5972
FXYD7	0.563299	3.49217e-192	3.81337e-191	29.597
CHD7	0.301348	6.45555e-192	7.04261e-191	29.5758
RUFY3	0.270095	7.0694e-192	7.70863e-191	29.5727
ACOT12	1.24094	8.60645e-192	9.37577e-191	29.5696
DNAI4	0.658235	8.52134e-192	9.28746e-191	29.5669
RTN1	0.2387	1.61927e-191	1.75985e-190	29.5447
MNAT1	0.259782	2.07425e-191	2.25326e-190	29.5362
CLIP4	0.472558	2.31397e-191	2.51248e-190	29.5328
ENSG00000288696	0.940065	3.28124e-191	3.56106e-190	29.5238
CHRM5	1.03235	4.07882e-191	4.42456e-190	29.5155
ENSG00000233403	1.61575	5.9954e-191	6.50052e-190	29.5064
STEAP2	1.82561	1.51003e-190	1.63495e-189	29.4758
ACTL6B	0.384706	1.40741e-190	1.52456e-189	29.4712
ENSG00000293898	2.90917	5.46524e-190	5.90621e-189	29.4398
SCN1A-AS1	0.930709	1.09502e-189	1.18171e-188	29.4031
ARHGEF37	0.949258	2.01964e-189	2.17646e-188	29.3822
ENSG00000248752	0.980079	4.31529e-189	4.64818e-188	29.3569
STRIP2	1.09296	8.4016e-189	9.04126e-188	29.3342
SLX4IP	0.439473	1.52141e-188	1.63495e-187	29.3116
ARSF	1.50697	4.51421e-188	4.84204e-187	29.2797
CHST1	0.697987	4.16466e-188	4.46919e-187	29.2778
CX3CL1	2.09988	1.46738e-187	1.57248e-186	29.2421
ENSG00000237720	1.23199	1.53562e-187	1.64483e-186	29.2355
ENSG00000307422	1.79544	2.25771e-187	2.41604e-186	29.2266
RIMS3	0.640119	3.34363e-187	3.57644e-186	29.2063
PCBP3	0.511877	3.55717e-187	3.80308e-186	29.2039
ENSG00000229321	0.714673	5.56138e-187	5.94308e-186	29.1889
ASS1	1.69583	1.07517e-186	1.14843e-185	29.1705
CTIF	0.203048	2.84918e-186	3.04049e-185	29.1322
CCDC148	0.438951	3.44719e-186	3.67525e-185	29.1256
LINC02609	1.21175	4.10242e-186	4.37179e-185	29.1224
FBXL13	0.661164	4.23916e-186	4.51543e-185	29.1189
CCDC30	0.384266	6.08135e-186	6.47167e-185	29.106
STXBP5	0.24271	8.63442e-186	9.18436e-185	29.0939
LRP1B	0.265154	1.13787e-185	1.20978e-184	29.0845
SYNDIG1L	2.45488	1.92419e-185	2.04485e-184	29.0767
RAB8B	0.340778	2.88758e-185	3.06582e-184	29.0523
TBC1D19	0.285827	3.02867e-185	3.21413e-184	29.0506
ENSG00000294293	0.760216	7.66558e-185	8.12375e-184	29.0195
PSD2	0.360672	1.12019e-184	1.18605e-183	29.0055
LGR4	0.610297	1.29697e-184	1.37259e-183	29.0008
TET2	0.296961	2.56401e-184	2.71102e-183	28.9769
FBXO10	0.504028	2.81189e-184	2.97038e-183	28.9739
NME5	0.777716	3.76125e-184	3.97142e-183	28.9645
PAK6	0.897671	4.28308e-184	4.52033e-183	28.9606
SMAP2	0.406976	8.11751e-184	8.56322e-183	28.9371
SMARCA5	0.382677	8.5392e-184	9.00394e-183	28.9353
DNAH9	0.758217	1.19712e-183	1.26111e-182	28.9237
ENSG00000241962	0.317392	1.54198e-183	1.62367e-182	28.9148
SYT3	0.749043	1.62386e-183	1.70911e-182	28.9138
GLDN	1.26761	4.08384e-183	4.29428e-182	28.8839
NQO2	0.632477	6.0302e-183	6.33805e-182	28.868
CDC14B	0.36831	8.30028e-183	8.71605e-182	28.8564
RNF157	0.356185	1.37963e-182	1.44808e-181	28.8387
RBFOX2	0.190476	1.45092e-182	1.52221e-181	28.8371
ENSG00000291113	0.430229	1.60505e-182	1.68315e-181	28.8336
TTC21B	0.334879	2.36639e-182	2.47927e-181	28.82
RET	1.83847	4.63945e-182	4.85632e-181	28.8033
PAX8	1.61464	3.3231e-181	3.46425e-180	28.7349
ENSG00000229962	0.546736	2.98542e-181	3.11505e-180	28.732
TVP23C	0.243636	8.80214e-181	9.16355e-180	28.694
ENSG00000303924	1.30393	1.78239e-180	1.85474e-179	28.6728
FAIM2	0.53822	2.47458e-180	2.57385e-179	28.6582
GCK	2.24194	3.90056e-180	4.05154e-179	28.651
GFOD2	0.360759	3.28004e-180	3.41009e-179	28.648
PFN2	0.810001	6.11927e-180	6.35327e-179	28.6276
ZFHX2-AS1	0.294705	8.61897e-180	8.94452e-179	28.6142
RNF175	0.4282	8.78053e-180	9.10807e-179	28.6136
PCP4L1	2.18194	1.57425e-179	1.63077e-178	28.6017
PTS	0.507114	1.62843e-179	1.68613e-178	28.5921
SP8	2.11003	2.77028e-179	2.86586e-178	28.5819
ENSG00000287722	1.28251	5.45912e-179	5.6424e-178	28.553
BEAN1	0.711931	5.16802e-179	5.34393e-178	28.5521
TAOK3	0.263561	5.62161e-179	5.80774e-178	28.5485
RASA2	0.256557	9.33564e-179	9.63607e-178	28.5306
ENSG00000310234	1.37006	5.76418e-178	5.93636e-177	28.471
MYO1B-AS1	1.58817	6.68786e-178	6.88455e-177	28.4667
OPRK1	2.08521	8.96933e-178	9.22897e-177	28.4594
BTBD9	0.230902	9.25616e-178	9.51985e-177	28.45
FBXO16	0.380393	9.86658e-178	1.01386e-176	28.4477
ENSG00000237773	0.842805	1.52298e-177	1.56357e-176	28.4336
PPP1R1A	1.31165	2.68355e-177	2.75261e-176	28.4155
DNM3	0.212358	2.61897e-177	2.68757e-176	28.4136
QRFPR	1.90027	3.83438e-177	3.92955e-176	28.4068
DENND2A	0.305124	3.69242e-177	3.78576e-176	28.4012
ATP2B3	0.535389	8.54845e-177	8.75674e-176	28.3718
TET3	0.263531	9.39639e-177	9.62105e-176	28.3682
ABI1	0.403388	9.59741e-177	9.8225e-176	28.3676
CACNB2	0.2908	9.62907e-177	9.85052e-176	28.3673
ENSG00000284634	0.552463	1.19946e-176	1.22541e-175	28.3599
CYP4Z1	1.46122	1.9034e-176	1.94113e-175	28.3474
NR2C1	0.418361	1.954e-176	1.99185e-175	28.3424
SULF2	0.451558	1.98656e-176	2.02414e-175	28.3418
GLB1L3	1.61758	8.92253e-176	9.07124e-175	28.2932
KNDC1	0.417294	1.1048e-175	1.12272e-174	28.2811
SIAH3	0.535406	1.96455e-175	1.99288e-174	28.2611
KIZ	0.447473	2.0611e-175	2.08991e-174	28.2592
CACNA1I	0.496546	2.19178e-175	2.22143e-174	28.257
LRFN2	0.287976	4.32646e-175	4.38307e-174	28.2326
PAPSS1	0.338288	1.18758e-174	1.20206e-173	28.1968
LONRF3	1.66417	5.55283e-174	5.61312e-173	28.1475
ENSG00000257239	1.05167	6.03498e-174	6.09782e-173	28.1416
SYT10	1.61855	9.08535e-174	9.17592e-173	28.1298
PIGL	0.319588	9.37182e-174	9.46109e-173	28.1233
SYP	0.301282	9.81399e-174	9.90313e-173	28.1216
SYT2	0.894452	1.56941e-173	1.58297e-172	28.1062
HS3ST5	0.33168	2.0055e-173	2.02106e-172	28.0962
GRB10	0.275128	3.28107e-173	3.30363e-172	28.0786
CAPRIN2	0.320692	3.30297e-173	3.32422e-172	28.0784
PHKB	0.258929	3.33906e-173	3.35908e-172	28.078
TEX15	1.18114	4.93904e-173	4.96646e-172	28.067
ELP1	0.353897	5.60654e-173	5.63521e-172	28.0595
LINC02240	1.11123	6.13402e-173	6.16269e-172	28.0589
ENSG00000255639	0.401447	1.04131e-172	1.04481e-171	28.0375
ENSG00000295485	0.860715	1.40055e-172	1.40403e-171	28.028
TUBE1	0.611379	2.62971e-172	2.6351e-171	28.0047
INTS4P1-1	1.31713	2.98463e-172	2.98944e-171	28.0028
NBAS	0.252467	3.03544e-172	3.03901e-171	27.9991
C2CD6	1.22127	3.52438e-172	3.52392e-171	27.9967
SMARCD3	0.297873	3.51466e-172	3.51573e-171	27.9939
KLHL7	0.284946	4.9085e-172	4.9036e-171	27.9819
TCF7L2	0.408308	7.19421e-172	7.1839e-171	27.969
SMYD2	0.442956	1.92728e-171	1.92202e-170	27.9331
CGREF1	0.541552	2.41694e-171	2.40929e-170	27.9251
LGI2	1.60364	3.02657e-171	3.01438e-170	27.9215
CDH12	0.307339	2.99546e-171	2.98469e-170	27.9172
GPD1	2.12131	5.11204e-171	5.08704e-170	27.9062
PRCD	1.56177	5.3036e-171	5.27539e-170	27.9009
RNF207	0.84126	5.05447e-171	5.03194e-170	27.8994
CERS5	0.318706	6.35459e-171	6.31805e-170	27.8901
MAPKBP1	0.308292	8.067e-171	8.01368e-170	27.8815
DYNC1I2	0.244351	8.57399e-171	8.51365e-170	27.8793
ARHGEF7	0.214897	1.06745e-170	1.05902e-169	27.8715
PRKCI	0.350649	5.33241e-170	5.28576e-169	27.8136
CFAP69	0.736294	8.54272e-170	8.46433e-169	27.7973
KIF6	0.798471	1.4751e-169	1.45967e-168	27.7778
SMYD3	0.2082	2.56533e-169	2.53632e-168	27.757
DPY19L2P1	0.438347	3.54873e-169	3.50408e-168	27.7454
ADRA1B	1.11142	7.78152e-169	7.67374e-168	27.7191
LINC00869	2.28148	1.03744e-168	1.02219e-167	27.715
AGAP2	0.42877	1.61167e-168	1.5873e-167	27.6907
HEATR4	0.896868	2.2345e-168	2.19977e-167	27.6801
ENSG00000306240	2.2003	2.68222e-168	2.63941e-167	27.6799
PLEKHA1	0.393483	3.1122e-168	3.06121e-167	27.6668
LYST	0.297713	1.22527e-167	1.20417e-166	27.6171
ANKRD17	0.226317	1.66549e-167	1.6361e-166	27.606
ENSG00000290548	0.352651	2.13599e-167	2.09741e-166	27.597
ENSG00000287558	0.822392	2.66196e-167	2.61277e-166	27.59
ENSG00000287215	1.86055	3.24756e-167	3.18482e-166	27.5876
ENSG00000309320	1.72708	6.54255e-167	6.4107e-166	27.5621
SLC66A1LP-1	1.56861	6.3889e-167	6.26281e-166	27.5614
TMC7	0.690722	6.95583e-167	6.81275e-166	27.5546
ASH1L	0.197048	7.22617e-167	7.07451e-166	27.5527
KLHL29	0.23687	9.401e-167	9.19978e-166	27.5432
ELOVL6	0.310256	1.0725e-166	1.0491e-165	27.5383
ENSG00000288016	0.901645	5.7948e-166	5.66594e-165	27.4786
KCNMB2-AS1	0.681487	6.19851e-166	6.0581e-165	27.4749
LRRTM4	0.233677	6.46161e-166	6.31256e-165	27.473
ASIC4	1.57444	2.00182e-165	1.95481e-164	27.4364
NRSN1	0.460707	3.01168e-165	2.93972e-164	27.4169
EYA2	0.754702	3.53666e-165	3.45068e-164	27.4119
ENSG00000302260	0.293906	4.21484e-165	4.10889e-164	27.4044
LINC02397	2.29701	7.56654e-165	7.37321e-164	27.3916
LINC00200	1.39063	7.89803e-165	7.69297e-164	27.3846
ACTN4	0.301227	1.23812e-164	1.20546e-163	27.365
ADGRA1	0.679608	2.00077e-164	1.94718e-163	27.348
SANBR	0.292032	2.66482e-164	2.59124e-163	27.3369
TRIM58	0.977945	5.40067e-164	5.24933e-163	27.3126
NEURL1	0.378134	5.61011e-164	5.4506e-163	27.3097
ENPP7P2	0.963216	6.02635e-164	5.85006e-163	27.3085
MAPK4	0.35431	5.84583e-164	5.67722e-163	27.3082
ZDHHC21	0.313944	9.29295e-164	9.0173e-163	27.2912
INSYN2A	0.486427	1.07679e-163	1.04353e-162	27.2859
ZKSCAN2-DT	0.406238	1.84338e-163	1.78494e-162	27.2661
CYTH1	0.262659	3.19947e-163	3.09542e-162	27.2457
ABO	1.67978	3.98422e-163	3.85303e-162	27.2423
ENSG00000245768	0.956849	4.45574e-163	4.30722e-162	27.2351
ENSG00000288560	1.61411	1.68887e-162	1.63189e-161	27.1887
BCL7C	0.309651	2.14243e-162	2.06927e-161	27.1757
NCOA3	0.300146	2.30738e-162	2.22766e-161	27.173
SATB1	0.56714	2.65403e-162	2.56126e-161	27.1682
DDX17	0.218909	3.13057e-162	3.01988e-161	27.1618
ENSG00000291166	0.860009	1.26017e-161	1.21409e-160	27.1113
ADCY9	0.301343	1.45292e-161	1.39802e-160	27.1051
ENSG00000290549	0.843558	1.59253e-161	1.53172e-160	27.1028
SOCS5	0.517994	2.86521e-161	2.75235e-160	27.0803
LIPE-AS1	0.29132	3.13572e-161	3.00969e-160	27.0767
LINC00237	2.30488	5.18458e-161	4.9679e-160	27.0665
PDCD7	0.483986	4.58774e-161	4.39784e-160	27.0627
LINC01117	1.06896	5.60017e-161	5.36389e-160	27.0573
NCOA7	0.445198	6.02587e-161	5.76924e-160	27.0526
USP49	0.301809	6.67575e-161	6.38877e-160	27.0487
SESTD1	0.256836	1.11523e-160	1.06596e-159	27.0297
CASZ1	1.12202	1.27598e-160	1.21859e-159	27.0277
NUP210	0.431286	1.26798e-160	1.21145e-159	27.025
MBD5	0.177535	1.38433e-160	1.32152e-159	27.0218
FIGNL2	1.04691	2.2493e-160	2.14636e-159	27.005
ENSG00000300612	1.16713	2.7161e-160	2.58964e-159	26.9985
HDAC7	0.431864	5.19596e-160	4.94994e-159	26.9727
C11orf58	0.369118	5.43505e-160	5.17557e-159	26.971
ENSG00000291185	0.683864	7.28111e-160	6.93062e-159	26.9607
ENSG00000271147	0.276106	8.09522e-160	7.70235e-159	26.9561
TSC22D2	0.364049	1.01791e-159	9.68112e-159	26.9477
RAD9A	0.278308	1.26963e-159	1.20701e-158	26.9394
LINC01766	1.81239	1.50832e-159	1.43334e-158	26.9382
RASGRF2-AS1	2.65759	2.04663e-159	1.94088e-158	26.9317
SLC35E3	0.31535	1.71355e-159	1.62635e-158	26.9283
GRK5	0.275106	2.40991e-159	2.28444e-158	26.9156
SENP7	0.216748	2.49322e-159	2.36245e-158	26.9143
C11orf87	1.06834	3.17689e-159	3.00902e-158	26.9073
SLC6A16	1.04426	4.83897e-159	4.58138e-158	26.8911
ENSG00000310018	0.848759	5.65696e-159	5.35363e-158	26.8854
ADAMTS7P1	1.0862	7.63722e-159	7.22473e-158	26.8744
KIF21B	0.255229	9.55252e-159	9.03286e-158	26.8643
DLGAP4	0.199118	2.32835e-158	2.19807e-157	26.8311
ENSG00000286872	0.481896	3.73738e-158	3.52682e-157	26.8136
FIG4	0.364704	9.24554e-158	8.7175e-157	26.7796
BCAT1	0.462071	1.5452e-157	1.45635e-156	26.7605
ENSG00000229337	0.986533	1.9519e-157	1.83816e-156	26.7532
DNAAF11	0.471983	7.73365e-157	7.27703e-156	26.7002
NMD3	0.413767	1.05438e-156	9.91722e-156	26.6885
ENSG00000286263	1.30841	1.35344e-156	1.27145e-155	26.6818
KCNK1	1.0245	1.34245e-156	1.26164e-155	26.6811
NBPF20	0.500964	1.33377e-156	1.254e-155	26.6798
ENSG00000203279	0.956179	1.61096e-156	1.51275e-155	26.6737
PRSS3	1.87961	7.67329e-156	7.18788e-155	26.6192
GPR26	0.888879	6.96574e-156	6.52775e-155	26.6184
MMP25-AS1	0.5379	1.28007e-155	1.19714e-154	26.5948
BTRC	0.253323	5.11204e-155	4.7731e-154	26.5424
KLHL3	0.445757	8.77113e-155	8.18295e-154	26.5221
SKAP2	0.890303	1.26489e-154	1.17959e-153	26.5092
SHANK2	0.18759	1.47258e-154	1.37216e-153	26.5025
ATP6V1A	0.423405	1.48612e-154	1.38421e-153	26.5022
PRIMA1	1.47547	2.91279e-154	2.71086e-153	26.48
IQCJ	0.423447	3.82091e-154	3.55459e-153	26.4664
HID1	0.640113	3.9068e-154	3.63303e-153	26.4659
ENSG00000290829	1.18343	5.79916e-154	5.38841e-153	26.4527
DSE	0.366572	5.64702e-154	5.24917e-153	26.4516
ENSG00000232451	1.26242	6.77699e-154	6.28936e-153	26.4473
SDK2	0.27987	6.73716e-154	6.25493e-153	26.4449
ENSG00000304617	2.29395	8.24876e-154	7.65215e-153	26.4446
MIR29B2CHG	0.357519	2.53048e-153	2.34462e-152	26.3948
SEMA4B	0.397209	2.70784e-153	2.50794e-152	26.3922
TMEM132D	0.366443	3.04667e-153	2.81949e-152	26.3877
UBN2	0.277912	5.21907e-153	4.82601e-152	26.3673
TCN2	0.782396	5.61532e-153	5.19034e-152	26.3653
CEACAM19	0.620885	8.68402e-153	8.02033e-152	26.3484
KLHDC10	0.305988	1.42291e-152	1.31364e-151	26.3292
PSG11-AS1	0.875385	1.62265e-152	1.49744e-151	26.3251
ALMS1P1-1	0.572557	3.20477e-152	2.95628e-151	26.2986
CLCA4-AS1	1.03983	7.67693e-152	7.07884e-151	26.2667
ANKUB1	0.522164	1.81724e-151	1.67365e-150	26.2325
LRRN3	0.525108	2.70929e-151	2.49421e-150	26.2172
LNPEP	0.464342	3.48064e-151	3.20177e-150	26.2075
GFPT2	0.574068	3.62249e-151	3.33093e-150	26.2061
SIM1	2.49032	4.84875e-151	4.45492e-150	26.2041
PXDN	0.267294	4.64387e-151	4.26839e-150	26.1963
LINC00571	0.800242	7.37956e-151	6.77746e-150	26.1795
LARRPM	0.92326	8.6126e-151	7.90674e-150	26.1738
DIRAS2	0.765455	1.32215e-150	1.21331e-149	26.157
ENSG00000298947	1.35475	2.13181e-150	1.95554e-149	26.1404
BLTP1	0.203384	2.85736e-150	2.619e-149	26.1268
OPRD1	1.90284	3.70053e-150	3.39048e-149	26.1223
BCHE	0.954906	4.76072e-150	4.36011e-149	26.1087
PTGIS	0.528896	4.91342e-150	4.49816e-149	26.1062
ENSG00000283573	1.62618	5.79136e-150	5.2998e-149	26.1035
SEMA3D	1.32579	6.21768e-150	5.68767e-149	26.0998
DMXL1	0.247399	1.03551e-149	9.46486e-149	26.0774
GLTP	0.607621	1.06965e-149	9.77304e-149	26.0765
AKAP5	1.51891	2.92475e-149	2.66801e-148	26.0413
ENSG00000291041	0.419146	3.09641e-149	2.82348e-148	26.0354
MAD2L2	0.374332	4.03465e-149	3.67319e-148	26.0251
COL23A1	0.620404	6.33102e-149	5.75927e-148	26.0082
RASD2	2.24852	8.42532e-149	7.66141e-148	26.0036
ENSG00000307743	2.09279	8.85348e-149	8.04757e-148	26.0013
MARCHF8	0.374222	9.58902e-149	8.71271e-148	25.9918
ANXA3	1.73836	1.14442e-148	1.03861e-147	25.9887
SYNJ1	0.357907	1.37939e-148	1.25136e-147	25.9778
KLHDC1	0.556902	1.57195e-148	1.42435e-147	25.973
ANKRD20A5P	1.47404	2.07125e-148	1.8753e-147	25.9655
ZC3H13	0.231981	3.70623e-148	3.35163e-147	25.9396
TRIM9	0.268141	4.08258e-148	3.69053e-147	25.9359
SLC22A17	0.507931	4.59803e-148	4.15322e-147	25.9315
IFFO2	0.878213	5.30727e-148	4.79197e-147	25.9267
PARP16	0.353675	1.02585e-147	9.25515e-147	25.9003
ENSG00000287844	1.22798	1.29942e-147	1.17142e-146	25.8936
ENSG00000283913	0.840116	1.54107e-147	1.38817e-146	25.8856
SPAG17	0.675161	1.71576e-147	1.54492e-146	25.8806
SLC39A10	0.339609	2.15182e-147	1.93529e-146	25.8717
PLEKHG5	0.402449	2.37721e-147	2.13716e-146	25.8679
AHRR	0.67272	2.61312e-147	2.34834e-146	25.8646
TFR2	0.773375	3.36397e-147	3.02074e-146	25.855
LUC7L2	0.292834	6.17926e-147	5.54446e-146	25.8308
NR2F1	0.343706	7.56217e-147	6.78266e-146	25.823
ENSG00000240086	0.779207	1.00616e-146	9.01738e-146	25.8128
WNT5A	1.28907	1.34801e-146	1.20717e-145	25.8034
ANKRD36B	0.215276	1.3366e-146	1.19742e-145	25.8009
NIPAL1	1.11984	2.18863e-146	1.95844e-145	25.7834
DCN	1.42401	2.67306e-146	2.39099e-145	25.7768
PPARGC1A	0.74073	2.71097e-146	2.42396e-145	25.7741
ENSG00000300209	2.58651	3.93166e-146	3.51132e-145	25.767
SEC14L5	1.2356	3.8371e-146	3.4282e-145	25.7619
DYNLRB2-AS1	1.06106	4.04552e-146	3.6102e-145	25.7602
VPS8	0.257531	4.82302e-146	4.30237e-145	25.751
MAST4	0.322283	1.87249e-145	1.66583e-144	25.6983
ELOVL4	0.565205	2.22669e-145	1.98017e-144	25.6918
MPHOSPH6	0.388834	2.31321e-145	2.05632e-144	25.6901
CFAP70	0.848609	2.68652e-145	2.3854e-144	25.6848
TMED8	0.384583	2.68039e-145	2.38088e-144	25.6844
CSDC2	0.596064	3.66375e-145	3.24933e-144	25.6724
ENSG00000287881	1.59257	5.374e-145	4.76246e-144	25.6616
HYDIN	0.406781	5.16106e-145	4.57551e-144	25.6588
KIAA0930	0.37885	6.05375e-145	5.36279e-144	25.6525
NRG4	1.08509	6.76172e-145	5.98765e-144	25.6498
RPS6KA1	1.10912	9.54484e-145	8.44891e-144	25.6363
LINC02198	1.05356	1.22882e-144	1.08731e-143	25.6265
CERT1	0.268535	1.32435e-144	1.17139e-143	25.6219
RALGPS2	0.260667	1.36777e-144	1.20933e-143	25.6207
OSBP2	0.216888	1.38994e-144	1.22846e-143	25.6201
CORO6	1.95357	2.54817e-144	2.25039e-143	25.6008
PPP1R26-AS1	0.422635	8.01917e-144	7.07935e-143	25.5516
ECE1	0.438884	8.13091e-144	7.17523e-143	25.551
CFD	1.40451	8.97537e-144	7.9174e-143	25.5498
TMEM232	0.353308	1.04318e-143	9.19506e-143	25.5412
ENSG00000308808	1.87083	1.42329e-143	1.25408e-142	25.5336
TRIM67	0.333137	1.70492e-143	1.50165e-142	25.5219
C14orf132	0.41318	1.78747e-143	1.57375e-142	25.5201
PRICKLE1	0.421169	2.1206e-143	1.86634e-142	25.5134
ATP1B1	0.389061	2.25533e-143	1.98415e-142	25.511
ENSG00000284624	0.421953	2.34141e-143	2.0591e-142	25.5096
ENSG00000237844	1.22003	3.62432e-143	3.18611e-142	25.4951
ANKRD13A	0.472825	3.74338e-143	3.28951e-142	25.4912
ENSG00000285741	0.774552	4.33083e-143	3.80428e-142	25.486
PUS7L	0.34727	4.99429e-143	4.3854e-142	25.4798
ENSG00000287962	1.5608	6.18217e-143	5.42432e-142	25.4748
FREM1	0.612209	6.03575e-143	5.29787e-142	25.4726
FCHO1	0.350327	7.32021e-143	6.4204e-142	25.4647
ENSG00000305643	1.55752	9.16761e-143	8.03765e-142	25.4593
PGAP1	0.231308	9.40246e-143	8.24041e-142	25.4549
ENSG00000288891	0.270698	9.98652e-143	8.74895e-142	25.4525
ENSG00000301924	1.49749	1.15834e-142	1.01363e-141	25.45
CTSV	0.771789	1.12942e-142	9.89082e-142	25.4481
ANKRD18A	0.610763	1.31556e-142	1.15078e-141	25.4422
ENSG00000287023	2.00561	2.60169e-142	2.27495e-141	25.42
GPR61	2.20189	3.87945e-142	3.38966e-141	25.4053
ANKRD29	0.858475	4.33864e-142	3.78799e-141	25.3955
MGAT4C	0.240831	6.37424e-142	5.56102e-141	25.3795
TMEM275	2.26711	8.38154e-142	7.30115e-141	25.3751
PLPP7	0.753102	7.44784e-142	6.49272e-141	25.374
RERG	0.738391	7.46432e-142	6.50463e-141	25.3739
WNT3	0.884838	1.24557e-141	1.0846e-140	25.3539
ENSG00000297096	0.772833	1.33615e-141	1.16304e-140	25.3512
LINC00581	0.782726	1.9307e-141	1.67865e-140	25.3365
PDZD7	0.664095	2.02121e-141	1.75668e-140	25.3343
HS6ST2	0.463415	2.4765e-141	2.15157e-140	25.326
MGAT4A	0.506646	2.61995e-141	2.27534e-140	25.3239
ENSG00000276690	2.36416	4.37338e-141	3.79384e-140	25.3107
NLK	0.302007	4.32451e-141	3.75286e-140	25.3039
ENSG00000254951	1.84644	5.98976e-141	5.1921e-140	25.2955
CDKL2	0.540947	5.84854e-141	5.0716e-140	25.2921
IL1RAPL2	0.354378	6.951e-141	6.02307e-140	25.2851
RAI2	0.393843	1.29288e-140	1.1186e-139	25.2606
MYH10	0.194976	1.45555e-140	1.25886e-139	25.2558
TAGAP-AS1	0.351108	1.5703e-140	1.3576e-139	25.2528
STRBP	0.210783	4.37416e-140	3.77884e-139	25.2122
ARK2C	0.234582	7.36344e-140	6.3565e-139	25.1915
TBC1D24	0.490032	9.73137e-140	8.39431e-139	25.1805
LGALSL-DT	0.418861	1.14104e-139	9.839e-139	25.1742
RUBCN	0.355965	1.20303e-139	1.03696e-138	25.172
PDIA5	0.393221	1.49942e-139	1.29147e-138	25.1633
GPR153	0.487871	1.65108e-139	1.42156e-138	25.1595
LARGE1	0.188429	7.24771e-139	6.23086e-138	25.1005
ABCC1	0.288672	1.3392e-138	1.14959e-137	25.076
KIFAP3	0.271386	1.58246e-138	1.35791e-137	25.0693
ENSG00000225982	1.50991	1.86197e-138	1.59715e-137	25.0658
PNMA5	2.3056	2.64321e-138	2.26644e-137	25.0552
ENSG00000286491	1.81532	3.1972e-138	2.73942e-137	25.0455
RNF180	0.247885	4.95396e-138	4.23517e-137	25.0237
PHF14	0.187876	5.60359e-138	4.78877e-137	25.0188
ZNF484	0.530508	6.36681e-138	5.43899e-137	25.0139
SYNE3	0.98954	7.0775e-138	6.04386e-137	25.0106
SLC9A2	1.56988	7.59381e-138	6.48236e-137	25.0098
ADRA1D	2.26832	1.56931e-137	1.33813e-136	24.9839
LINC02614	0.321366	1.55754e-137	1.32859e-136	24.9779
CHAT	1.42169	3.2526e-137	2.76729e-136	24.9513
ZDBF2	0.462037	3.12135e-137	2.65662e-136	24.9501
ENSG00000263551	0.826782	4.4965e-137	3.82278e-136	24.9361
TNRC6B	0.174108	4.66683e-137	3.96612e-136	24.9339
ENSG00000236064	1.83606	9.49498e-137	8.06635e-136	24.9095
KLHDC8A	0.405227	1.06125e-136	9.0124e-136	24.9009
GXYLT2	1.0532	1.83337e-136	1.55522e-135	24.8806
LINC00290	1.58655	2.10217e-136	1.78193e-135	24.8766
GLCCI1	0.23682	2.16216e-136	1.8321e-135	24.8722
TBC1D12	0.340059	3.6805e-136	3.11636e-135	24.8508
PDE4D	0.155506	3.86645e-136	3.27261e-135	24.8491
SLITRK1	0.575336	5.19683e-136	4.39703e-135	24.8372
ENSG00000289384	1.40811	9.05593e-136	7.65377e-135	24.8175
LARP1B	0.259398	8.62349e-136	7.29365e-135	24.8165
RUSC2	0.293232	1.78197e-135	1.50441e-134	24.7872
RADIL	0.388533	2.00705e-135	1.6938e-134	24.7824
TARBP1	0.279451	2.09575e-135	1.76801e-134	24.7807
ZFYVE16	0.257911	2.8735e-135	2.42236e-134	24.7679
CFAP47	0.791696	2.98844e-135	2.51741e-134	24.7665
ENSG00000271727	0.405512	4.30094e-135	3.62038e-134	24.7517
HOOK3	0.223232	1.72643e-134	1.45113e-133	24.6954
ENSG00000237188	0.494072	1.89795e-134	1.59471e-133	24.6917
RABGEF1	0.195636	1.9242e-134	1.61618e-133	24.691
DPP10-AS1	0.990521	3.81515e-134	3.19974e-133	24.6645
ARNT	0.345589	3.80626e-134	3.19345e-133	24.6633
LINC02795	0.791456	3.9279e-134	3.29311e-133	24.6628
MPHOSPH8	0.272162	5.82635e-134	4.87941e-133	24.646
B3GAT2	0.487246	6.07545e-134	5.08617e-133	24.6444
ENSG00000225889	0.990071	8.8547e-134	7.40209e-133	24.6305
PPP1R12B	0.219777	9.80121e-134	8.19035e-133	24.6249
CFAP20DC-AS1	1.09986	1.75674e-133	1.46588e-132	24.6028
ST8SIA6	0.621395	2.49893e-133	2.08368e-132	24.5872
DPYSL3	0.185609	2.83628e-133	2.36326e-132	24.5817
PDE4C	1.22453	3.95677e-133	3.29568e-132	24.5698
PHF20L1	0.260153	5.8479e-133	4.86204e-132	24.5522
KIAA1549	0.207812	1.02178e-132	8.4891e-132	24.5294
SH3BGRL2	0.219332	2.30248e-132	1.91087e-131	24.4963
RNF128	1.16353	3.2093e-132	2.66153e-131	24.4843
GGT7	0.279501	3.58064e-132	2.96842e-131	24.4782
ENSG00000290924	0.367728	3.5949e-132	2.97917e-131	24.4781
DTD1	0.266861	4.18962e-132	3.47078e-131	24.4718
LINC02693	0.408575	5.57551e-132	4.61721e-131	24.4602
SUSD5	1.28057	1.36695e-131	1.13038e-130	24.4254
LOXHD1	1.47247	1.55961e-131	1.28877e-130	24.4212
GLT1D1	0.417787	1.46005e-131	1.20693e-130	24.4208
ZNF518A	0.256204	2.04202e-131	1.68558e-130	24.4069
FAM163A	1.42966	2.73949e-131	2.25887e-130	24.398
ENSG00000291240	1.55336	3.28636e-131	2.70883e-130	24.3901
PRMT8	0.354831	1.0522e-130	8.66673e-130	24.3397
CFAP46	0.496186	1.65552e-130	1.36312e-129	24.321
RPS6KA6	0.353795	1.68831e-130	1.38962e-129	24.3202
MFSD4B	0.378841	2.81039e-130	2.31236e-129	24.2993
SLC9A9	0.480135	2.97959e-130	2.4507e-129	24.2968
PPP3CB	0.254072	3.75804e-130	3.08987e-129	24.2872
CBLN4	1.2492	5.01605e-130	4.12274e-129	24.2772
THBS3	0.539336	5.61318e-130	4.61188e-129	24.2709
SPSB4	0.3726	8.59049e-130	7.05555e-129	24.2533
ERICH2	1.91281	9.8042e-130	8.04378e-129	24.2519
ACBD5	0.45234	1.0774e-129	8.83629e-129	24.2439
RBP1	0.908568	1.83507e-129	1.50396e-128	24.2229
ADAM29	1.21055	2.44e-129	1.99902e-128	24.212
IL11RA	0.707107	4.10543e-129	3.36227e-128	24.189
GLYATL2	0.342581	8.27331e-129	6.76845e-128	24.1595
ENSG00000237464	1.27134	8.75359e-129	7.15883e-128	24.1592
ZNF471	0.326131	1.02076e-128	8.34497e-128	24.1508
PDGFA	0.912508	1.07431e-128	8.77965e-128	24.1496
HLCS	0.273298	1.44988e-128	1.18447e-127	24.1363
ATXN2-AS	0.430672	1.52617e-128	1.24636e-127	24.1342
FAXC	0.308109	2.25493e-128	1.84085e-127	24.118
ENSG00000231863	0.816112	2.32514e-128	1.89749e-127	24.1173
NPFFR2	1.82396	2.74295e-128	2.23686e-127	24.1141
BRMS1L	0.491667	3.23192e-128	2.63469e-127	24.1032
CELSR1P1	0.452121	3.26204e-128	2.6583e-127	24.1027
ENSG00000301491	2.41637	5.14761e-128	4.19192e-127	24.0907
PIAS2	0.285908	4.65007e-128	3.78809e-127	24.0879
TXNDC16	0.298516	8.93555e-128	7.27144e-127	24.0608
GYG2	0.631569	9.87577e-128	8.03087e-127	24.0569
ANKRD36	0.141374	1.00793e-127	8.19349e-127	24.0559
PLS3-AS1	2.2926	1.61232e-127	1.3102e-126	24.0422
ZIM2	0.67712	3.19298e-127	2.591e-126	24.0081
CYP4F35P-1	1.34549	3.5642e-127	2.89122e-126	24.0053
LMTK3	0.290812	3.8782e-127	3.14481e-126	23.9997
C2CD2	0.573984	6.16599e-127	4.99645e-126	23.9806
SLC27A2	1.28668	1.34817e-126	1.09054e-125	23.9495
SDC3	0.306881	1.46744e-126	1.1866e-125	23.9441
SLC49A4	0.353201	1.62267e-126	1.31166e-125	23.94
ENSG00000285253	0.278882	1.80877e-126	1.46157e-125	23.9354
ENSG00000251488	1.42536	1.97343e-126	1.5935e-125	23.9341
MICALL2	0.668437	2.09031e-126	1.68729e-125	23.9297
CLUL1	1.33139	2.28891e-126	1.8463e-125	23.9275
VPS9D1	0.381234	2.24981e-126	1.8154e-125	23.9263
TMEM38A	0.473722	3.75528e-126	3.02806e-125	23.9049
ENSG00000303171	1.48358	6.58989e-126	5.30815e-125	23.8841
FBXO41	0.453352	6.65249e-126	5.3567e-125	23.881
SEMA6D	0.173666	9.91411e-126	7.98022e-125	23.8642
ACVR2B	0.302427	1.79027e-125	1.43903e-124	23.8394
EML2	0.397385	2.09769e-125	1.68497e-124	23.8328
PCDH8	1.1705	4.01006e-125	3.21995e-124	23.8072
USP11	0.318249	4.27429e-125	3.43092e-124	23.8028
ENSG00000287975	0.95759	4.85305e-125	3.89412e-124	23.7987
GALT	0.615309	6.77472e-125	5.4304e-124	23.7838
ENSG00000229588	0.394398	7.13173e-125	5.71458e-124	23.7814
GVQW3	0.511654	2.87534e-124	2.30237e-123	23.7228
TEX21P	0.501169	2.96268e-124	2.37149e-123	23.7215
ENSG00000291065	0.402996	4.7678e-124	3.81241e-123	23.7013
TUB	0.341847	5.51886e-124	4.40991e-123	23.6951
SH3KBP1	0.251659	5.59061e-124	4.46569e-123	23.6945
MEGF9	0.229871	6.60592e-124	5.27403e-123	23.6875
TMOD2	0.267517	6.60716e-124	5.27403e-123	23.6875
HULC	0.530821	7.20643e-124	5.75039e-123	23.684
ENSG00000286402	1.7499	8.93035e-124	7.12106e-123	23.6784
FRMPD1	1.07584	8.58934e-124	6.85151e-123	23.6777
DNAJC12	1.76467	9.90821e-124	7.89806e-123	23.6735
TMCC3	0.734872	1.61914e-123	1.28931e-122	23.6502
ETS1	0.705102	1.68053e-123	1.33774e-122	23.6482
ADARB1	0.26343	1.96956e-123	1.56727e-122	23.6413
ENSG00000288035	1.18282	2.30054e-123	1.83001e-122	23.637
ENSG00000310376	0.23392	3.02783e-123	2.40688e-122	23.6231
ZYG11B	0.303798	4.85345e-123	3.8541e-122	23.6031
ENSG00000288674	0.837818	5.85675e-123	4.64921e-122	23.5958
GLIS1	0.80337	1.42525e-122	1.13061e-121	23.5581
CYRIB	0.209733	1.66315e-122	1.31887e-121	23.5509
GPR179	1.52075	1.90707e-122	1.51126e-121	23.5476
FAM13B	0.225241	1.81266e-122	1.43695e-121	23.5472
ZFYVE9	0.236117	2.35599e-122	1.86637e-121	23.536
MOSMO	0.313762	2.76459e-122	2.1893e-121	23.5293
DENND1B	0.314378	3.79201e-122	3.00085e-121	23.5158
NPM2	0.52101	4.99721e-122	3.95325e-121	23.5042
UPP2	0.26825	5.37143e-122	4.24783e-121	23.501
SERTAD4	1.3571	8.12446e-122	6.41614e-121	23.4855
ENSG00000288612	0.819726	8.08842e-122	6.38988e-121	23.4842
FER	0.185006	1.10398e-121	8.71252e-121	23.4703
ENSG00000302847	1.83733	1.72774e-121	1.36258e-120	23.4555
GABRA5	0.638633	1.78169e-121	1.40464e-120	23.4502
OR2L2	1.22485	2.04003e-121	1.60776e-120	23.4456
MAP2	0.126998	2.44869e-121	1.92917e-120	23.4365
CFAP91	0.51089	3.05718e-121	2.40774e-120	23.427
ENSG00000284116	0.391683	3.68381e-121	2.90026e-120	23.419
SLC8A1	0.177517	5.01121e-121	3.94262e-120	23.4059
TNFRSF25	0.572286	5.59024e-121	4.39517e-120	23.4013
MIR181A2HG	0.435249	9.09113e-121	7.14277e-120	23.3804
DGKE	0.479066	9.92414e-121	7.79459e-120	23.3767
PIK3R1	0.419267	1.20206e-120	9.43474e-120	23.3684
RASAL1	1.0215	2.16407e-120	1.6968e-119	23.3442
KIF3A	0.259238	2.46147e-120	1.92801e-119	23.3376
FARP1	0.173384	2.90874e-120	2.27757e-119	23.3305
SVIL-AS1-1	0.215703	3.46418e-120	2.71156e-119	23.323
LINC02490	1.33051	4.09435e-120	3.20373e-119	23.3182
ULK2	0.25139	4.83671e-120	3.78332e-119	23.3086
ENSG00000287720	0.411211	5.28964e-120	4.1348e-119	23.3049
MTMR6	0.407681	5.6212e-120	4.39099e-119	23.3023
ENSG00000226530	0.809195	5.70923e-120	4.45824e-119	23.3021
RUFY2	0.209257	6.36184e-120	4.9628e-119	23.2969
ENSG00000309673	1.70858	7.87752e-120	6.14308e-119	23.2909
ENSG00000294531	0.409593	1.24644e-119	9.71347e-119	23.2681
MTMR4	0.286847	1.54796e-119	1.20591e-118	23.2587
MAN1A2	0.224277	1.59687e-119	1.24359e-118	23.2573
RYBP	0.310162	2.40996e-119	1.87617e-118	23.2396
SHISAL2A	1.51035	2.91545e-119	2.26662e-118	23.2338
SFI1	0.302676	3.47794e-119	2.70028e-118	23.2238
SLC37A1	0.303961	3.73992e-119	2.90172e-118	23.2207
ALOX12P2-1	0.659855	3.93183e-119	3.04959e-118	23.219
ENSG00000253288	0.509155	3.95071e-119	3.0632e-118	23.2185
ENSG00000253553	0.293971	4.03024e-119	3.12381e-118	23.2175
CPB2-AS1	0.439432	4.3125e-119	3.34146e-118	23.2147
URI1	0.307774	5.9922e-119	4.63982e-118	23.2004
CELF6	0.381418	1.11257e-118	8.60891e-118	23.1737
LINC02906	2.36126	1.72542e-118	1.33331e-117	23.1605
RFPL2	1.22812	1.58209e-118	1.22297e-117	23.16
STX1B	0.436398	1.57986e-118	1.22166e-117	23.1586
ENAH	0.204369	2.12108e-118	1.63796e-117	23.1458
FNBP1L	0.142714	3.18219e-118	2.45573e-117	23.1284
FAM222B	0.229901	4.75757e-118	3.67024e-117	23.1109
ENSG00000305853	1.81348	5.60005e-118	4.31728e-117	23.1076
RAB11FIP1	1.35458	5.49545e-118	4.23806e-117	23.1064
RAB6B	0.302496	7.53691e-118	5.80852e-117	23.091
ATP2C1	0.207284	9.87876e-118	7.60823e-117	23.0792
B4GALT6	0.419317	1.00483e-117	7.73619e-117	23.0786
ENSG00000293808	1.60277	1.16967e-117	8.99929e-117	23.0744
ENSG00000229278	0.679065	1.14763e-117	8.83268e-117	23.0731
RNF13	0.331589	1.94829e-117	1.49748e-116	23.0498
NSF	0.391793	2.02681e-117	1.55732e-116	23.0481
LRRN2	0.233808	2.15817e-117	1.65769e-116	23.0454
PRKAA2	0.366743	2.21926e-117	1.70405e-116	23.0442
ENSG00000249776	0.74372	3.23291e-117	2.48072e-116	23.0283
ENSG00000283108	0.28387	3.36663e-117	2.58247e-116	23.0261
PXK	0.299008	3.71705e-117	2.84936e-116	23.0217
ENSG00000299098	2.16799	4.17154e-117	3.1967e-116	23.0213
ENSG00000303721	1.0857	4.5327e-117	3.46999e-116	23.0143
GOLGA8B	0.302155	6.31968e-117	4.83479e-116	22.9987
ENSG00000286976	1.48445	1.13258e-116	8.65602e-116	22.9755
CPEB2-DT	0.494316	1.58801e-116	1.21287e-115	22.9588
ENSG00000224848	0.539678	1.59092e-116	1.21469e-115	22.9587
BMS1P23	0.774318	1.92326e-116	1.46795e-115	22.9507
SLC38A6	0.295934	2.82449e-116	2.15368e-115	22.9335
ZNF765	0.56162	3.3651e-116	2.56504e-115	22.9261
SHD	1.67226	3.89307e-116	2.96551e-115	22.9223
GUCY1A1	0.450302	3.67942e-116	2.8037e-115	22.9221
NUCB2	0.345745	4.1914e-116	3.19171e-115	22.9163
ENSG00000227745	0.546014	4.6466e-116	3.53717e-115	22.9119
ARIH1	0.199108	5.66829e-116	4.31349e-115	22.9031
LRFN5-DT	1.36089	6.83532e-116	5.19642e-115	22.8967
CELF1	0.185443	6.97551e-116	5.30125e-115	22.894
ENSG00000256982	0.697527	7.14713e-116	5.42988e-115	22.8935
HDX	0.279638	1.65186e-115	1.25372e-114	22.8563
LINC01798	0.866121	2.0744e-115	1.57287e-114	22.8471
IPMK	0.368729	3.62812e-115	2.75003e-114	22.8219
MVB12B	0.217547	3.97899e-115	3.01498e-114	22.8178
ZNF385C	0.856137	4.50653e-115	3.41359e-114	22.813
ENSG00000297397	1.3501	5.43197e-115	4.11188e-114	22.8059
METTL6	0.257181	5.46219e-115	4.1334e-114	22.8039
ENSG00000304642	1.89156	7.72006e-115	5.84007e-114	22.7931
ENSG00000247925	0.443601	8.99608e-115	6.80312e-114	22.7821
FAM242A	0.664283	9.62386e-115	7.27547e-114	22.7794
[truncated: 20,998 more rows]

## Sheet: NPC
gene	logfoldchange	pval	pval_adj	score
PRDM16	3.64455	0	0	354.394
GLI3	3.94541	0	0	335.858
ADGRV1	2.96118	0	0	324.418
SHROOM3	3.42122	0	0	305.12
GLI2	3.70464	0	0	300.895
MSI2	2.36265	0	0	299.015
FBXL7	2.95209	0	0	298.957
PARD3B	3.49131	0	0	296.159
NPAS3	2.69417	0	0	279.546
LINC01965	3.34935	0	0	272.224
LTBP1	3.70176	0	0	268.918
SLC1A3	3.455	0	0	268.078
QKI	2.19342	0	0	257.534
ZBTB20	2.32714	0	0	250.99
EEPD1	3.68794	0	0	249.963
ENSG00000289128	2.05516	0	0	248.476
CREB5	3.41517	0	0	245.594
SOX6	2.62432	0	0	241.098
PLCE1	2.77926	0	0	239.387
PTPRM	2.37488	0	0	238.93
CELSR1	3.36456	0	0	238.232
COL11A1	2.8889	0	0	234.326
ZEB1	2.34699	0	0	233.195
BOC	3.13184	0	0	226.306
RRM2	4.3902	0	0	226.121
LRIG1	3.37715	0	0	224.908
COL4A5	3.73757	0	0	218.578
PTN	2.57543	0	0	218.387
DACH1	2.99468	0	0	214.516
DIAPH3	3.58613	0	0	214.486
DOCK1	2.81731	0	0	213.52
SPATA13	2.53969	0	0	212.464
ENSG00000284906	3.6636	0	0	209.398
PAX6	3.46093	0	0	209.175
TNC	4.31675	0	0	208.739
SYNE2	1.63095	0	0	206.425
APOLD1	3.19212	0	0	204.922
RFX4	3.97289	0	0	204.621
MIR9-1HG	1.64489	0	0	203.525
MKI67	3.83458	0	0	203.099
SAMD4A	2.96745	0	0	202.901
PARD3	2.21618	0	0	202.885
MIR99AHG	1.6432	0	0	202.56
SEMA5B	2.15596	0	0	200.223
ENSG00000271860	2.01351	0	0	200.115
NOTCH1	3.27934	0	0	199.887
NKAIN3	1.54878	0	0	199.802
SMC4	3.07568	0	0	198.814
IQGAP2	3.10997	0	0	198.409
PLPP3	3.79447	0	0	198.124
ENSG00000257060	2.59579	0	0	196.858
RGS20	3.03149	0	0	195.882
PALLD	2.36841	0	0	195.63
MIR924HG	3.74611	0	0	193.445
NOTCH2	3.3455	0	0	192.206
RAD51B	2.35922	0	0	190.644
ANKFN1	3.12944	0	0	190.448
BMP7	4.07552	0	0	190.133
CNTLN	2.25342	0	0	189.577
ABTB2	2.77178	0	0	189.35
CDH20	3.08848	0	0	189.312
TMEM132D	2.74761	0	0	187.656
TCF7L1	3.07659	0	0	187.243
LINC00595	2.63008	0	0	186.685
PDGFD	3.43491	0	0	186.596
CENPF	3.34735	0	0	186.035
MMS22L	2.57332	0	0	185.07
LAMA1	3.06157	0	0	184.639
ZFHX4	2.2514	0	0	184.392
NFIA	1.41566	0	0	183.679
PHLPP1	1.8139	0	0	183.091
RORA	1.80729	0	0	183.038
TOP2A	4.25836	0	0	180.702
ASPM	4.13386	0	0	179.389
TBC1D1	2.12074	0	0	178.073
MAGI1	1.58995	0	0	177.565
PLEKHA7	2.36464	0	0	176.669
GULP1	2.32978	0	0	176.632
STK3	3.06407	0	0	176.327
TTYH1	3.02996	0	0	175.56
TMEM132B	1.68978	0	0	174.909
KIF15	3.6073	0	0	172.976
MEGF10	3.35777	0	0	172.646
LINC01515	3.59291	0	0	171.188
TMTC2	1.80189	0	0	168.815
CHD7	1.70032	0	0	168.634
NUSAP1	4.01628	0	0	168.465
CENPE	3.5793	0	0	168.311
BRIP1	3.60169	0	0	168.158
COL27A1	3.76118	0	0	167.746
YAP1	3.61246	0	0	166.184
KNL1	4.11342	0	0	165.743
LRP4	3.6442	0	0	164.579
INTU	1.88645	0	0	161.507
STK33	3.09752	0	0	161.444
GPR156	2.58164	0	0	160.694
FSTL1	2.91694	0	0	159.669
MAST4	2.04409	0	0	157.926
BRCA1	2.66949	0	0	157.887
LDLRAD3	1.60569	0	0	157.882
GPC6	1.4575	0	0	157.849
KIF18B	4.52614	0	0	157.696
LIPG	3.81301	0	0	156.494
FOXN4	4.06721	0	0	155.709
RFTN2	2.65092	0	0	155.595
ATP1A2	3.31889	0	0	153.912
MMD2	2.74993	0	0	152.339
MOXD1	3.08657	0	0	152.266
ENSG00000231252	1.86187	0	0	151.881
DLEU2	1.66405	0	0	151.723
TNS1	2.83877	0	0	151.224
PLCH1	2.59281	0	0	150.27
KIF11	3.69903	0	0	150.232
MPPED2	1.32289	0	0	149.253
PRC1	3.54411	0	0	148.463
TACC3	3.7417	0	0	148.414
LIFR	2.23356	0	0	148.258
FGFR2	1.75251	0	0	147.924
ATAD2	2.83707	0	0	147.492
TPX2	4.01025	0	0	147.371
NAALADL2	1.56815	0	0	146.579
SPATA6	2.71471	0	0	146.436
BICC1	2.20626	0	0	146.41
THBS3-AS1	4.03323	0	0	146.201
SOX2	2.3189	0	0	145.909
LRRC3B	1.75638	0	0	145.453
NCAPG	3.45221	0	0	145.44
MFGE8	3.43865	0	0	144.973
FBN2	2.51151	0	0	144.914
COL4A6	3.37367	0	0	144.656
PTPRZ1	1.24289	0	0	144.641
PREX2	1.96621	0	0	144.543
KIF4A	4.15139	0	0	143.583
MIS18BP1	2.67994	0	0	143.521
ENSG00000284686	3.36395	0	0	143.391
LINC01748	1.99832	0	0	142.826
CEP112	1.62765	0	0	142.525
CTBP2	1.18061	0	0	142.001
ADAMTS6	2.38902	0	0	141.929
LAMA3	3.30553	0	0	141.913
TCF7L2	1.95912	0	0	141.826
MEIS2	1.15806	0	0	141.523
FANCI	2.81351	0	0	141.283
GTSE1	4.43034	0	0	141.241
DDAH1	2.07218	0	0	141.149
NCKAP5	1.22032	0	0	140.956
UTRN	1.75446	0	0	140.575
TBL1X	2.0009	0	0	140.347
ENSG00000228061	3.67986	0	0	140.173
CEP152	2.91386	0	0	139.924
ENSG00000285367	2.89465	0	0	139.832
TEAD1	1.42912	0	0	139.221
BUB1B	4.40191	0	0	138.457
PRKD1	1.52226	0	0	138.432
KNTC1	2.51246	0	0	138.265
SFRP1	2.67641	0	0	138.11
MELK	4.05519	0	0	137.412
STON2	2.95943	0	0	137.293
LINC00944	3.68911	0	0	137.037
TRPS1	2.01885	0	0	136.387
MSH5	2.8785	0	0	136.281
LRIG3	3.32507	0	0	135.994
MLC1	3.93243	0	0	135.804
LINC01572	2.05284	0	0	135.788
HMGA2	2.61407	0	0	135.572
KIF14	4.11809	0	0	135.362
PELI2	1.25876	0	0	134.981
HELLS	2.30021	0	0	134.965
IQGAP3	4.48067	0	0	134.934
MRC2	3.2112	0	0	134.411
CCDC175	3.09263	0	0	133.154
CDH23	2.43241	0	0	132.889
RGS3	3.29471	0	0	132.849
MID1	1.56436	0	0	132.798
NDE1	3.38274	0	0	132.763
PLEKHG1	2.11793	0	0	132.54
FHOD3	1.05197	0	0	132.308
RFX2	1.9008	0	0	132.284
HS6ST2	2.53338	0	0	132.142
ENSG00000272865	4.11064	0	0	132.112
CIT	2.3458	0	0	132.082
LINC01473	1.62577	0	0	131.906
C21orf58	3.38916	0	0	131.775
GAB1	1.91405	0	0	131.717
PHIP	1.14196	0	0	131.712
SNCAIP	1.38725	0	0	130
HEG1	2.41974	0	0	129.713
SALL3	3.48455	0	0	129.565
STK39	1.34806	0	0	129.417
EGFR	2.645	0	0	129.362
MSI1	1.98203	0	0	129.165
SPC25	3.65927	0	0	129.01
SLCO1C1	4.03783	0	0	128.705
CDK6	2.46815	0	0	128.652
TANC1	2.41839	0	0	128.586
SGO2	3.5884	0	0	128.543
ZEB1-AS1	2.97889	0	0	128.235
FGFR1	1.82705	0	0	128.098
CENPK	3.21608	0	0	126.987
C2CD5-AS1	3.14312	0	0	126.862
BCAN	3.342	0	0	126.532
DLGAP5	4.61452	0	0	126.495
ZMAT1	1.81053	0	0	125.778
SEPTIN9	1.90143	0	0	125.588
RHOJ	3.12298	0	0	125.531
LMCD1-AS1	2.23491	0	0	125.49
CENPM	3.49085	0	0	125.09
WSCD1	2.4063	0	0	124.975
SRRM2	1.03206	0	0	124.499
BAZ2B	1.00801	0	0	124.157
MYO3A	3.03467	0	0	124.119
BMPR1B	2.20607	0	0	124.09
CDON	1.30958	0	0	124.072
AGBL1	2.85285	0	0	123.997
NCAPD2	2.37679	0	0	123.622
MED12L	1.63782	0	0	123.561
NDC80	4.22398	0	0	123.557
MIR9-3HG	1.20764	0	0	123.506
NUF2	4.06634	0	0	122.986
ITGA2	3.55677	0	0	122.913
ITGB5	3.37623	0	0	122.459
FANCA	1.90153	0	0	122.423
CDC25C	4.37622	0	0	122.369
SOX1-OT	2.21541	0	0	122.277
GPC4	2.77592	0	0	122.218
KIFC1	4.49907	0	0	121.54
SLC4A4	2.06589	0	0	121.164
FAM182B	2.14243	0	0	120.877
CA12	2.08833	0	0	120.721
ACSBG1	4.42889	0	0	120.692
XRCC2	3.37423	0	0	120.355
KIF23	4.30689	0	0	120.352
VEPH1	3.19198	0	0	119.759
RGMA	2.01986	0	0	119.291
ZFP36L1	3.13618	0	0	119.25
TICRR	3.62621	0	0	119.138
ZMIZ1	1.01679	0	0	118.912
CENPI	3.02057	0	0	118.576
SH3RF1	1.79293	0	0	118.025
FANCD2	3.16266	0	0	117.899
MAML2	1.43532	0	0	117.238
PHF21B	1.09749	0	0	117.034
PDGFDDN	3.00886	0	0	117.015
EVA1C	2.86113	0	0	116.901
NOTCH3	2.86621	0	0	116.798
KIF2C	4.47235	0	0	116.413
ECT2	3.69077	0	0	115.969
AKAP12	1.35555	0	0	115.178
MOB3B	1.62739	0	0	115.159
CCDC18	2.06205	0	0	114.471
RFC3	1.62659	0	0	114.401
PARAIL	1.68848	0	0	114.39
BUB1	4.16254	0	0	114.085
CENPU	3.16139	0	0	113.914
VIM	2.69599	0	0	113.844
KIF18A	4.19596	0	0	113.833
SPAG5	3.00177	0	0	113.82
DTL	3.41209	0	0	113.483
STOX1	2.91842	0	0	113.457
E2F7	3.83159	0	0	113.222
FAM53B	1.21658	0	0	112.989
ADGRB3	0.712973	0	0	112.796
CHST3	3.50591	0	0	112.653
PANTR1	0.978152	0	0	112.483
EZH2	1.27608	0	0	111.863
NSD2	1.01158	0	0	111.743
WDR49	3.39594	0	0	111.708
FUT9	1.11654	0	0	111.691
ANLN	2.49317	0	0	111.539
GPR39	1.65923	0	0	111.394
ELP4	1.43176	0	0	111.32
ARAP2	1.97189	0	0	110.338
NEK6	1.5565	0	0	110.202
GRID2	1.10169	0	0	110.197
PARPBP	3.29441	0	0	110.092
RACGAP1	2.80331	0	0	109.896
CKAP2	2.71122	0	0	109.7
ENSG00000287862	2.23804	0	0	109.351
ID4	3.26666	0	0	109.337
FAT1	2.39689	0	0	109.002
ARHGEF26	2.64182	0	0	108.894
WHRN	2.56386	0	0	108.543
NBPF26	3.01711	0	0	108.536
ZNRF3	1.50118	0	0	107.868
GFAP	4.13285	0	0	107.692
EZR	1.40475	0	0	107.645
FIGN	1.81822	0	0	107.512
WDR62	3.78752	0	0	107.421
ZHX2	1.23176	0	0	107.377
CECR2	1.06409	0	0	107.176
LINC-PINT	1.43965	0	0	107.119
ENSG00000262198	3.07102	0	0	107.025
FGFR3	3.85013	0	0	106.992
PON2	2.87812	0	0	106.966
ITGB8	1.45236	0	0	106.907
CEP83	1.65102	0	0	106.887
CRB1	1.54486	0	0	106.751
RTKN2	2.82523	0	0	106.503
PRR11	3.43176	0	0	106.273
MYO1E	1.70869	0	0	106.015
CFAP54	2.69278	0	0	106.012
STOX2	1.09241	0	0	105.71
SCARA3	2.68362	0	0	105.667
ABHD3	2.47022	0	0	105.662
ZHX3	1.13252	0	0	105.597
NFIB-AS1	1.97057	0	0	105.534
DEK	1.58222	0	0	105.527
ITGA6	2.36741	0	0	105.443
GLYATL2	1.60213	0	0	105.437
CCND2	1.16551	0	0	105.359
CUX1	0.899003	0	0	105.359
MEIS1	1.71123	0	0	105.337
CCDC150	2.94183	0	0	105.068
RNF213	1.39559	0	0	104.969
PDE3A	1.79559	0	0	104.924
SPECC1	1.30515	0	0	104.804
EMX2OS	2.45453	0	0	104.783
KIF24	3.77082	0	0	104.629
GPSM2	2.04963	0	0	104.406
PRAG1	1.52416	0	0	104.104
ZGRF1	2.09284	0	0	103.766
DEPDC1B	2.07683	0	0	103.747
NEDD4L	0.739611	0	0	103.734
IGF2BP3	0.977432	0	0	103.593
CDCA2	4.37027	0	0	103.387
UHRF1	2.9946	0	0	103.371
CDK5RAP2	1.02482	0	0	103.28
LINC00511	1.14587	0	0	103.279
SIPA1L1	1.16433	0	0	103.229
CHST9	2.89552	0	0	103.215
PHYHIPL	1.27889	0	0	103.118
NCAPG2	1.92858	0	0	102.991
FAM111A	3.59646	0	0	102.977
ARHGAP11A	3.70811	0	0	102.821
ENSG00000308267	2.20982	0	0	102.804
CEP128	1.23155	0	0	102.778
CDC14A	2.40169	0	0	102.163
INCENP	2.29169	0	0	102.103
NCAPH	3.97609	0	0	102.061
CPQ	2.23174	0	0	101.98
CKAP2L	4.07124	0	0	101.695
NBPF14	3.09408	0	0	101.624
PSAT1	2.28748	0	0	101.394
GLCCI1	1.05496	0	0	101.393
DENND2B	1.72409	0	0	101.372
SPAG9	0.893058	0	0	101.223
BLM	3.07123	0	0	100.952
ATP13A4	2.54888	0	0	100.908
ESPL1	4.44601	0	0	100.897
HCCS-DT	2.16707	0	0	100.869
SPC24	3.42256	0	0	100.77
NR2E1	3.35809	0	0	100.769
STIL	2.79727	0	0	100.695
GNG12	2.4833	0	0	99.8439
AMZ2	1.55403	0	0	99.8283
CRB2	4.22837	0	0	99.6483
MOV10	2.84137	0	0	99.5553
ANOS1	2.6721	0	0	99.5493
CFAP44	2.00102	0	0	99.5148
XPO1	0.916281	0	0	99.4834
HJURP	4.46405	0	0	98.9621
NAPEPLD	1.82301	0	0	98.606
SMAD3	2.08643	0	0	98.3315
MYO10	1.18297	0	0	97.8559
E2F3	1.58492	0	0	97.8264
PALS1	2.28217	0	0	97.768
LINC02513	3.9766	0	0	97.6896
ENSG00000299339	3.85585	0	0	97.6196
NFIC	1.14696	0	0	97.4411
TTK	4.32829	0	0	97.4208
CTNNA1	1.15745	0	0	97.2835
BEND7	2.08305	0	0	97.2632
BRCA2	3.34779	0	0	97.229
ENSG00000231424	2.69022	0	0	97.143
LIMD1	1.70241	0	0	97.0728
BBX	1.31774	0	0	97.0092
TTYH3	1.07105	0	0	96.7277
ENSG00000288088	3.24914	0	0	96.6783
GAS2L3	2.20739	0	0	96.5788
CHAF1A	1.85448	0	0	96.4912
PDLIM5	2.23035	0	0	96.3963
CENPP	1.22453	0	0	96.043
CLU	3.06149	0	0	95.9234
TMEM163	1.01123	0	0	95.8417
PI4K2B	1.89366	0	0	95.7313
KCNN3	1.06579	0	0	95.4915
MDFIC	2.96019	0	0	95.3822
SMC2	2.3339	0	0	95.359
TGIF2	2.44176	0	0	95.272
KIF20B	1.72221	0	0	95.0599
DNAI1	3.02606	0	0	94.4897
ASAP1	0.828444	0	0	94.3558
NEIL3	4.29268	0	0	94.2501
ENSG00000300984	2.32984	0	0	94.233
AGO3	0.96538	0	0	94.2011
NOS1AP	0.99351	0	0	93.9964
POLA2	2.52398	0	0	93.9073
TRIM9	1.0697	0	0	93.6345
STK17A	1.79551	0	0	93.5067
CDK1	4.23345	0	0	93.2586
WWOX	0.89862	0	0	93.151
PRIM2	1.22939	0	0	93.1332
HOPX	4.24742	0	0	92.8258
ENSG00000285283	3.12835	0	0	92.7913
NFIA-AS2	2.40532	0	0	92.6594
COL5A1	2.79702	0	0	92.6133
SCLT1	0.889594	0	0	92.5397
STARD9	1.20652	0	0	92.5072
ZFHX3-AS1	1.41476	0	0	92.4987
GPC5	1.48059	0	0	92.4905
STAG1	0.786555	0	0	92.2135
SDC2	2.07665	0	0	92.1261
SOX9	2.82068	0	0	91.9885
KAT2B	1.60308	0	0	91.962
ZNF730	1.38961	0	0	91.9578
TLK1	1.17803	0	0	91.7317
BARD1	2.09469	0	0	91.6892
SLC6A1	1.23149	0	0	91.6805
KCNJ10	3.56565	0	0	91.4786
MCC	1.59987	0	0	91.1468
NES	1.99956	0	0	91.1409
IGSF11	1.44564	0	0	91.1259
ERBIN	0.964637	0	0	91.1117
TTF2	2.43898	0	0	90.9792
CEP192	1.02471	0	0	90.8461
SMOC1	1.23509	0	0	90.6818
LPCAT1	1.38034	0	0	90.5088
SLC15A2	2.94242	0	0	90.1974
POC1A	3.0819	0	0	90.1102
SEMA5A	1.47719	0	0	89.9931
LINC00943	4.0903	0	0	89.936
CNN3	1.39179	0	0	89.6567
PDGFRB	2.53968	0	0	89.5992
WDHD1	1.93522	0	0	89.5174
KLF12	0.838733	0	0	89.3509
ITPKB	2.31777	0	0	89.2581
MTAP	1.29094	0	0	89.2385
THSD4	1.77133	0	0	89.1453
NEK7	1.8251	0	0	89.0734
OBI1-AS1	2.92986	0	0	89.0527
MAP4	0.846326	0	0	88.9506
SLC35F1	0.840575	0	0	88.8705
KIF13A	1.18934	0	0	88.7552
DAPK2	1.69967	0	0	88.7227
ATAD5	1.48687	0	0	88.7183
LINC02649	2.53382	0	0	88.6834
TNFRSF19	1.80098	0	0	88.6826
GMDS-DT	1.12386	0	0	88.6463
CHD2	0.77469	0	0	88.4129
ARHGAP21	0.662635	0	0	88.1834
PNISR	0.686246	0	0	88.1783
SRGAP3	0.654711	0	0	87.9349
SKA2	1.18935	0	0	87.8945
HMGB2	3.00744	0	0	87.8929
ENSG00000286185	3.08703	0	0	87.7295
ENSG00000267383	1.48722	0	0	87.6197
NEAT1	1.74443	0	0	87.5868
SCRN1	1.30702	0	0	87.5412
PREX1	1.03773	0	0	87.488
EXO1	3.7671	0	0	87.478
PRKG1	0.94265	0	0	87.2474
FBLN7	2.66778	0	0	87.0802
SH3PXD2B	1.0339	0	0	86.8765
RAD51AP1	3.41014	0	0	86.8365
L3MBTL4	1.04649	0	0	86.6958
TET1	1.05923	0	0	86.5985
KIF22	2.22793	0	0	86.5137
LTBP3	1.17828	0	0	86.4964
FOS	2.66161	0	0	86.1389
EVC	1.92128	0	0	86.1052
TEX9	1.30002	0	0	85.8489
ENSG00000286757	2.32892	0	0	85.793
TFAP2C	3.58252	0	0	85.6616
WEE1	2.67797	0	0	85.6288
AIF1L	2.35439	0	0	85.486
ZNF521	1.4436	0	0	85.3898
CLSPN	2.84929	0	0	85.3803
POLE2	2.56992	0	0	85.3566
DBF4	2.1359	0	0	85.3265
TSPAN5	0.711713	0	0	85.3043
RBL1	1.18646	0	0	85.2248
FUS	0.89548	0	0	85.1887
TTC23	2.29596	0	0	85.1833
CDCA8	4.11114	0	0	85.0964
OPHN1	0.827174	0	0	85.0439
CRHR2	2.23342	0	0	84.8034
SGO1	4.26686	0	0	84.7883
TMPO	1.46014	0	0	84.7455
VCAN	0.791379	0	0	84.7217
MYBL1	3.22915	0	0	84.7122
CEP55	4.0331	0	0	84.6777
CNTFR	1.00304	0	0	84.6772
SREK1	0.930026	0	0	84.5733
SLC1A2	0.86303	0	0	84.4192
RIPOR3	3.47244	0	0	84.3621
ROR1	1.4992	0	0	84.3475
NASP	0.938635	0	0	84.3341
GRAMD1C	2.42488	0	0	84.3189
PCGF5	1.47935	0	0	84.2328
ENSG00000282381	2.63614	0	0	84.1348
CEP135	1.21271	0	0	84.0794
CARD8	1.57306	0	0	84.077
PLSCR4	3.26136	0	0	83.9666
DEPDC1	4.18889	0	0	83.9518
ARHGAP31	1.94156	0	0	83.8574
ENSG00000227475	3.99839	0	0	83.775
DCDC1	2.4899	0	0	83.717
PRDM16-DT	2.92712	0	0	83.6255
LNC-LBCS	1.75884	0	0	83.6193
MCM10	3.42802	0	0	83.4375
ENSG00000303393	4.06695	0	0	83.4314
SEL1L3	0.884707	0	0	83.3919
ENSG00000231401	2.31092	0	0	83.3744
C16orf74	3.15936	0	0	83.3169
FAM111B	3.57165	0	0	83.1496
ADGRG1	1.49158	0	0	83.0938
PTPN13	1.05476	0	0	82.8316
NXN	0.831809	0	0	82.7499
GALNT16	1.49123	0	0	82.66
ARHGAP5	0.98931	0	0	82.5199
CTNNA3	1.44047	0	0	82.5197
CACHD1	1.04772	0	0	82.512
HES1	3.73024	0	0	82.4631
DAAM2	2.85376	0	0	82.3827
PDLIM3	3.58863	0	0	82.2731
CCDC14	0.830163	0	0	82.2422
FNDC3B	1.10934	0	0	82.2173
SYT17	1.7946	0	0	82.1002
BMP2K	1.18255	0	0	82.0392
ENOSF1	2.26238	0	0	81.9206
FAM107A	3.74044	0	0	81.8721
PARP4	2.17351	0	0	81.8635
XYLT1	0.726565	0	0	81.7875
PHF19	2.56795	0	0	81.6678
SKA3	4.01728	0	0	81.6617
TIMP3	1.86666	0	0	81.6223
AP3B1	1.07522	0	0	81.5873
CPNE2	1.59512	0	0	81.4313
CHEK1	2.53592	0	0	81.3325
NCAPD3	1.44496	0	0	81.2788
LRP5	1.16707	0	0	81.2164
EVC2	2.14448	0	0	81.1647
SLC12A4	3.07192	0	0	81.0639
PBK	4.17281	0	0	81.0216
CDCA7L	2.41634	0	0	80.8469
GEN1	2.09243	0	0	80.7488
CDC45	3.57911	0	0	80.7051
GINS1	2.3708	0	0	80.6887
POLA1	1.04424	0	0	80.6442
LDLR	1.29082	0	0	80.6374
MIR222HG	0.951092	0	0	80.6335
DIRC3	1.9215	0	0	80.3243
CDIN1	0.968579	0	0	80.3224
EFCAB2	0.985921	0	0	80.2852
TCF3	1.08608	0	0	80.1584
MCM8	2.25307	0	0	79.9418
CNTRL	0.854818	0	0	79.9288
VCL	1.31525	0	0	79.8383
ENTREP1	2.93988	0	0	79.7393
SREBF2	0.7003	0	0	79.6887
SETBP1	0.496862	0	0	79.5094
DDHD1-DT	1.84232	0	0	79.3868
CENPC	1.1786	0	0	79.256
DENND2A	0.926958	0	0	79.193
INPPL1	2.56612	0	0	79.1444
CIP2A	1.6612	0	0	78.9308
RRS1-DT	3.10913	0	0	78.8754
FOXM1	4.03982	0	0	78.7565
OIP5	3.29395	0	0	78.7492
CHD9	0.621453	0	0	78.7361
AHI1	0.963975	0	0	78.6934
NEMP1	2.22757	0	0	78.6186
VRK1	1.12965	0	0	78.6125
NRXN1-DT	1.81757	0	0	78.5225
ARHGEF6	2.37766	0	0	78.4669
TROAP	4.87947	0	0	78.2834
ILDR2	1.66614	0	0	78.2361
SCAF11	1.04793	0	0	78.1962
ENSG00000304497	1.61391	0	0	78.0859
COL9A1	2.30442	0	0	78.0701
TULP3	1.25327	0	0	77.878
CENPO	2.19023	0	0	77.8042
ENSG00000227240	1.9036	0	0	77.7825
USP38-DT	1.39038	0	0	77.7122
ZNF423	0.863915	0	0	77.6141
KIAA1958	0.924165	0	0	77.5262
HEATR5A	1.37652	0	0	77.5188
RAD54B	1.52384	0	0	77.4718
TLE1	1.16785	0	0	77.4393
MIR9-2HG	0.532517	0	0	77.3284
HNRNPA2B1	0.696952	0	0	77.3071
ADGRA3	0.955193	0	0	77.222
PLK4	2.90426	0	0	77.2055
AURKA	3.752	0	0	77.1815
NSRP1	1.07857	0	0	76.8905
RAD18	1.07832	0	0	76.8851
RFX3-DT	1.27499	0	0	76.8788
CDH4	0.720925	0	0	76.8142
VAT1L	1.3493	0	0	76.6976
LMNB1	1.04366	0	0	76.6839
ENSG00000301688	1.69844	0	0	76.6805
NEDD4	1.81921	0	0	76.3209
RAB31	1.77368	0	0	76.1197
PDE4B	0.70526	0	0	76.1192
MASTL	2.48873	0	0	76.0535
AURKB	4.52475	0	0	76.0194
ENSG00000288605	1.65412	0	0	75.989
GPM6B	0.747731	0	0	75.9202
CCNB1	3.68202	0	0	75.8768
TEAD2	1.96801	0	0	75.8462
SHCBP1	3.57576	0	0	75.8156
EFNB2	0.890816	0	0	75.8123
MPDZ	0.815747	0	0	75.6874
ZNF43	1.21007	0	0	75.6866
FYCO1	2.53596	0	0	75.6775
ZRANB3	1.04324	0	0	75.6471
ENSG00000294582	3.78144	0	0	75.6455
IL33	3.1705	0	0	75.5981
KPNA2	2.53844	0	0	75.5763
PBX3	1.09053	0	0	75.5696
LINC01994	2.81348	0	0	75.5466
WIPF1	2.08337	0	0	75.1815
MAP3K20	1.44924	0	0	75.1739
NSMCE2	0.894561	0	0	75.0127
CALD1	0.996064	0	0	74.9952
VEGFA	1.54753	0	0	74.8059
ATP9B	0.740214	0	0	74.6673
PARP14	2.76298	0	0	74.6048
ITGB3BP	1.36216	0	0	74.5556
H1-4	1.70289	0	0	74.4235
HEPACAM	3.83038	0	0	74.2138
MIRLET7BHG	0.696926	0	0	74.1908
BICD1	0.552789	0	0	74.1858
ENSG00000308288	1.73416	0	0	74.1152
FAXDC2	2.23062	0	0	74.0568
SON	0.774281	0	0	74.0045
PRR5L	1.90449	0	0	73.9937
DYNC2H1	0.85555	0	0	73.8667
HMGN2	1.48073	0	0	73.8537
ANKHD1	0.762518	0	0	73.7734
LPAR1	2.41622	0	0	73.7474
RREB1	2.3723	0	0	73.5667
PHGDH	3.04275	0	0	73.5024
PRTFDC1	1.25238	0	0	73.4584
AKAP13	0.812566	0	0	73.3067
B3GLCT	1.87275	0	0	73.1276
FOLH1	3.51656	0	0	73.1147
NUCKS1	0.95772	0	0	73.0819
PNISR-AS1	1.65676	0	0	73.0079
PEA15	1.53126	0	0	72.8975
NBPF10	2.66013	0	0	72.8444
DENND1A	0.62647	0	0	72.7896
LFNG	3.86178	0	0	72.6723
SOAT1	2.01166	0	0	72.6435
CCNB2	3.62887	0	0	72.543
LINC02249	1.67294	0	0	72.4251
FAM219A	0.914709	0	0	72.4227
NACC2	2.41964	0	0	72.4096
NFE2L2	1.1283	0	0	72.383
POU2F1	0.689425	0	0	72.3634
COL22A1	2.79544	0	0	72.3052
AXL	2.69209	0	0	72.2554
REST	1.73763	0	0	72.2207
ENSG00000291054	1.4454	0	0	72.1793
NEDD1	1.98984	0	0	72.1153
ATP2B4	0.961409	0	0	72.0185
ARMC3	2.97063	0	0	71.9517
MXD3	3.24538	0	0	71.6783
CARHSP1	1.03057	0	0	71.5398
PTAR1	1.31845	0	0	71.5336
TNRC18	0.57684	0	0	71.4984
COMMD10	0.888408	0	0	71.4851
ARHGAP19	2.08735	0	0	71.4486
CCNF	1.77379	0	0	71.4126
ADK	0.719397	0	0	71.3866
NTNG1	1.10087	0	0	71.382
NOTCH2NLA	3.29067	0	0	71.3783
B3GAT2	1.50772	0	0	71.1234
CFAP46	1.63409	0	0	71.1108
RALGAPA2	0.620047	0	0	71.0678
MGMT	1.39472	0	0	71.0138
RPGR	1.58542	0	0	70.9794
FAM83D	3.3452	0	0	70.972
VGLL4	0.720058	0	0	70.9399
EGR1	2.55386	0	0	70.8698
ARHGAP42	1.53604	0	0	70.7664
RAD54L	3.27282	0	0	70.7366
LIG1	1.15401	0	0	70.6905
LYN	2.42394	0	0	70.6205
LINC01896	3.48834	0	0	70.5879
ENSG00000259560	2.1546	0	0	70.4786
SVIL	0.821416	0	0	70.4475
HP1BP3	0.70075	0	0	70.4258
LINC02883	1.22432	0	0	70.4181
PRDM5	1.84029	0	0	70.3907
SERPINI2	3.63948	0	0	70.242
DNAH7	1.4848	0	0	70.2366
DUSP16	1.46343	0	0	70.2255
NSUN7	2.0508	0	0	70.09
PRKD3	1.46728	0	0	70.0366
ENSG00000227598	1.27443	0	0	70.0361
SEMA6A	0.817037	0	0	70.0297
EMX2	2.23134	0	0	69.9993
CHEK2	3.14074	0	0	69.9641
PVT1	1.15448	0	0	69.855
MLLT10	0.697618	0	0	69.8279
MEF2C-AS2	1.16841	0	0	69.8093
CPAMD8	1.92035	0	0	69.7965
PRRT2	1.08245	0	0	69.7753
ODAD2	3.10245	0	0	69.7086
ELF1	1.75155	0	0	69.6316
MPHOSPH9	0.884949	0	0	69.5991
ENSG00000222000	3.00777	0	0	69.565
KLHDC8A	1.243	0	0	69.4522
PTPRG	0.675152	0	0	69.4458
ABCC4	1.4053	0	0	69.3944
ENSG00000254919	2.19949	0	0	69.2387
DBF4B	1.68386	0	0	69.237
TIMELESS	2.28625	0	0	69.1963
CFAP298-TCP10L	1.6251	0	0	69.152
SLC2A10	3.23457	0	0	69.023
ARX	1.18979	0	0	68.9626
GLIS3	1.07793	0	0	68.9445
FSIP2-AS1	1.30997	0	0	68.9032
MINDY4	1.47398	0	0	68.8628
SPOPL-DT	1.57624	0	0	68.8433
SPICE1	1.64218	0	0	68.83
DLEU1	1.46019	0	0	68.8119
RPSA2	1.81618	0	0	68.8017
ENSG00000188897	3.00588	0	0	68.5779
PALD1	1.62655	0	0	68.5558
ARHGEF40	1.29873	0	0	68.5422
ORC6	2.56746	0	0	68.4131
ZCCHC24	2.05153	0	0	68.3776
HES5	3.6015	0	0	68.3738
CUEDC1	0.998463	0	0	68.333
TFPI	2.40176	0	0	68.2806
SLC24A3	0.837434	0	0	68.1841
SMO	1.6183	0	0	68.1648
NBPF19	3.01442	0	0	68.1476
TLN2	0.707696	0	0	68.0736
EDNRB	3.47262	0	0	68.0293
MCM5	2.40404	0	0	67.9216
TP53	1.73243	0	0	67.9168
DNAH11	2.46079	0	0	67.8675
PCLAF	3.37967	0	0	67.8298
PCGF3-AS1	0.775488	0	0	67.7998
MND1	1.82618	0	0	67.7507
CDK14	0.648615	0	0	67.6829
RHOQ	1.40242	0	0	67.6186
STON1	1.88314	0	0	67.5883
FZD8	3.78876	0	0	67.5645
ENSG00000278254	2.88332	0	0	67.4742
CFAP47	2.48121	0	0	67.3551
MYBL2	3.56863	0	0	67.3493
PDE8A	1.09655	0	0	67.2749
PBXIP1	2.77961	0	0	67.2373
ASPH	0.81953	0	0	67.2245
ENSG00000264449	0.941654	0	0	67.1518
SPARCL1	2.88241	0	0	67.1339
CXXC5	1.41108	0	0	67.0465
UBL7-DT	1.48614	0	0	66.9252
LHX2	0.794939	0	0	66.7209
VWA3A	2.214	0	0	66.7129
POLE	0.928448	0	0	66.6984
MCM3	2.45241	0	0	66.6364
SP110	3.0406	0	0	66.5736
ETV1	1.36293	0	0	66.5208
RGS22	2.64153	0	0	66.5152
FBXO32	1.73869	0	0	66.329
TMEM98	1.32903	0	0	66.2896
APC	0.634413	0	0	66.2675
WIPF3	0.924987	0	0	66.2449
ENSG00000299197	2.04745	0	0	66.2293
PSRC1	3.0605	0	0	66.0903
GS1-24F4.2	3.10562	0	0	66.0735
C5	1.7037	0	0	66.0577
MNS1	1.98401	0	0	66.05
ARNT2	0.679281	0	0	65.9353
AFF1	1.31177	0	0	65.9176
RCOR1	0.790388	0	0	65.872
EPHB4	2.63786	0	0	65.8692
FANCB	1.86979	0	0	65.8686
ENSG00000307088	1.3035	0	0	65.856
TCP10L	1.15192	0	0	65.8122
ZC3H12C	1.03543	0	0	65.7968
ANP32E	2.40463	0	0	65.7578
LMNB2	1.29253	0	0	65.7119
H1-3	2.24093	0	0	65.6749
ENSG00000301764	2.13616	0	0	65.6203
JAM2	1.22593	0	0	65.5947
DZIP1L	1.90603	0	0	65.4988
ATG10	0.961678	0	0	65.3783
HYDIN	1.1723	0	0	65.3103
SORCS2	0.751938	0	0	65.2116
SETD5	0.615281	0	0	65.1883
TM9SF5P	1.42977	0	0	65.1808
KIF20A	4.57131	0	0	65.1636
GPBP1	0.781308	0	0	65.1499
STAG2	0.833241	0	0	64.9121
TMEM91	0.980759	0	0	64.8403
CFAP43	1.98789	0	0	64.8367
FUT8	0.692325	0	0	64.7957
SPIDR	0.565255	0	0	64.7854
PLEKHG4B	0.703169	0	0	64.7558
FANK1	2.81487	0	0	64.6718
DIPK2A	1.23162	0	0	64.6703
ACTN1	1.13178	0	0	64.6347
ENSG00000290606	2.74605	0	0	64.5997
WDR76	1.78818	0	0	64.5816
PDPN	3.1862	0	0	64.5007
ZNF438	0.900775	0	0	64.4626
IRF2	1.49107	0	0	64.4286
FAM114A1	2.45172	0	0	64.4108
DDX12P	3.07687	0	0	64.376
CNGA3	2.64314	0	0	64.349
PHKA1	2.23536	0	0	64.3308
F3	2.49326	0	0	64.3101
NFATC4	3.16357	0	0	64.229
TUBB6	2.85385	0	0	64.2067
ST3GAL3	0.659181	0	0	64.1675
RMST	1.11968	0	0	64.1177
LITAF	2.1414	0	0	64.0748
ANKRD6	0.994336	0	0	64.073
ENSG00000286288	1.89564	0	0	64.0567
ENSG00000287683	1.32032	0	0	64.0129
FGGY	1.21189	0	0	63.9317
CDYL	0.995227	0	0	63.889
ENSG00000286615	3.10578	0	0	63.8203
HIF3A	1.23038	0	0	63.7918
NKAIN4	2.15046	0	0	63.7414
EEF1D	1.11736	0	0	63.5562
LRP6	0.662561	0	0	63.5441
OAF	3.30547	0	0	63.4956
ZNF551	1.32505	0	0	63.3122
PRKCA	0.59613	0	0	63.2703
ZNF833P	1.53809	0	0	63.2105
ENTPD1-AS1	0.712041	0	0	63.1835
LINC00299	1.96874	0	0	63.1683
AFG2A	0.805088	0	0	63.1198
PAG1	0.846428	0	0	63.0224
ENSG00000285741	2.08679	0	0	62.952
SUZ12	0.975513	0	0	62.9257
DOCK11	0.984133	0	0	62.8534
EFHC1	0.998001	0	0	62.8269
DIPK1C	4.00932	0	0	62.7893
ZNF83	0.992313	0	0	62.7128
RAD51	3.10882	0	0	62.5988
DOT1L	0.738235	0	0	62.5808
CYBRD1	3.19112	0	0	62.5189
ENSG00000287528	2.76702	0	0	62.4964
RHEB	1.08207	0	0	62.48
SALL1	2.54302	0	0	62.455
CFAP210	2.06177	0	0	62.3738
POU3F3	0.764709	0	0	62.3078
SMC5	0.699958	0	0	62.2434
CCN1	3.21968	0	0	62.2058
ATP10B	2.28465	0	0	61.9329
MAMDC2	1.94459	0	0	61.931
SEPTIN10	0.920511	0	0	61.8581
C5orf34	2.40336	0	0	61.8402
ASAP3	1.56266	0	0	61.8111
MBNL3	2.28759	0	0	61.7711
E2F8	4.32409	0	0	61.7497
LAMA4	1.70026	0	0	61.6899
POLD3	1.17284	0	0	61.5334
ENKUR	2.47458	0	0	61.5133
USP2-AS1	1.97909	0	0	61.5048
CDCA3	3.95143	0	0	61.4984
CENPN	3.61344	0	0	61.4965
TDRD3	0.893962	0	0	61.4605
ENSG00000300981	2.77495	0	0	61.4375
ADAMTS12	2.34477	0	0	61.433
ESCO2	3.33347	0	0	61.4268
RGS12	0.551152	0	0	61.3857
JUN	1.75602	0	0	61.2953
PPCDC	0.832217	0	0	61.2748
CDKAL1	0.592083	0	0	61.2744
HEPH	2.39624	0	0	61.27
CD58	2.02532	0	0	61.2002
ENSG00000284959	1.37452	0	0	61.1917
STK24	0.876319	0	0	61.09
RNASEH2B	0.977373	0	0	61.0608
UNK	0.750978	0	0	61.0236
ZNF90	2.07023	0	0	60.9491
JAM3	0.684131	0	0	60.9389
SUMF1	0.681279	0	0	60.8132
EYA2	1.76394	0	0	60.7994
ENSG00000302067	2.66743	0	0	60.771
SPATA17	2.04698	0	0	60.7197
PIK3CB	0.819961	0	0	60.6985
ENSG00000309267	2.57828	0	0	60.6128
FOXP1	0.581563	0	0	60.5651
ELOVL2	0.882014	0	0	60.5642
ENSG00000289725	1.8907	0	0	60.5461
HMGB1	0.670212	0	0	60.5083
NTN1	1.21651	0	0	60.488
E2F2	3.71878	0	0	60.4358
STXBP6	1.38408	0	0	60.3762
TMTC4	1.04789	0	0	60.3589
ENSG00000269026	1.81025	0	0	60.2985
AGO2	0.674214	0	0	60.1425
ARID2	0.633703	0	0	60.0004
H1-10-AS1	1.39946	0	0	59.985
DDX17	0.540692	0	0	59.9238
ATG7	0.735384	0	0	59.9022
ZFYVE16	0.689935	0	0	59.8814
NFATC3	0.81169	0	0	59.8785
TONSL	2.757	0	0	59.858
DCBLD2	0.777275	0	0	59.7986
TEKT1	3.44975	0	0	59.7893
HMGN3	1.06535	0	0	59.6503
ERBB2	2.11984	0	0	59.6183
COL16A1	1.83426	0	0	59.5788
E2F1	3.04656	0	0	59.5422
LRRC9	2.27803	0	0	59.5315
DNAH9	1.85511	0	0	59.4825
RRM1	1.47665	0	0	59.4066
PLXNC1	0.880512	0	0	59.319
RHBDL3	1.19207	0	0	59.234
ENSG00000246090	1.01167	0	0	59.2333
PARD6G-AS1	1.49167	0	0	59.2072
AR	2.68862	0	0	59.1095
LSAMP	0.446386	0	0	59.0956
GDPD2	3.0324	0	0	59.0702
JPH1	1.039	0	0	59.0029
GRIN2A	0.934121	0	0	58.9867
CDCA7	2.1073	0	0	58.962
EFHC2	2.94065	0	0	58.8908
SPON1	1.12711	0	0	58.8114
TBC1D5	0.531808	0	0	58.7535
LINC01550	2.08796	0	0	58.7514
FANCC	0.77893	0	0	58.7369
PLOD2	1.84484	0	0	58.7342
HSPB1	3.24298	0	0	58.7268
SPSB4	0.975352	0	0	58.7258
ENSG00000291224	1.37071	0	0	58.6425
H1-0	1.29535	0	0	58.5353
DSN1	2.63763	0	0	58.5169
KIF1B	0.407657	0	0	58.4125
LPP	0.64413	0	0	58.2538
LINC00472	1.24386	0	0	58.2315
SOX1	2.23904	0	0	58.1933
CYP4F24P	3.73541	0	0	58.1854
SNHG31	1.74575	0	0	58.1676
DDX11	1.52558	0	0	58.1666
EIF1B-AS1	1.0944	0	0	58.1544
PLXNB1	0.866124	0	0	58.1047
RBMX	0.572698	0	0	58.0868
ENSG00000305478	2.20334	0	0	58.0611
ENSG00000280241	1.23932	0	0	58.0532
DTHD1	4.17094	0	0	58.0513
DNMBP	1.40724	0	0	58.0501
CRISPLD1	1.75089	0	0	57.9825
LAMB2	2.89228	0	0	57.9812
PLCB4	0.676559	0	0	57.9259
KDM3B	0.702852	0	0	57.9256
PABPC1L	1.51793	0	0	57.918
CBX5	0.839002	0	0	57.8236
CCDC88C	0.774309	0	0	57.8109
P4HA1	0.95271	0	0	57.759
GAREM2	1.77856	0	0	57.7472
HKDC1	3.69009	0	0	57.6944
LINC02984	2.83799	0	0	57.6916
FRMPD2	3.58412	0	0	57.6546
ANP32B	1.31026	0	0	57.6524
THBS2	2.29288	0	0	57.6331
MMADHC-DT	1.04272	0	0	57.597
CCDC15	2.01976	0	0	57.5402
CENPJ	0.804676	0	0	57.5264
ZFAND6	0.981268	0	0	57.5232
EMP2	2.57373	0	0	57.4314
LINC02851	1.81445	0	0	57.3631
IFT122	0.96828	0	0	57.2902
FHAD1	2.3381	0	0	57.2416
TYMS	3.15185	0	0	57.2268
ENSG00000290812	2.12638	0	0	57.1099
MTBP	1.35231	0	0	57.1022
ENSG00000283674	0.824006	0	0	57.0676
PAX3	3.51292	0	0	57.005
PLCG1	0.657578	0	0	56.9936
ENSG00000299261	2.32944	0	0	56.9511
ENSG00000293636	2.00404	0	0	56.8514
DHRS3	2.06628	0	0	56.8329
BAZ1B	0.665694	0	0	56.8119
MKLN1	0.595488	0	0	56.8092
ZNF367	2.24552	0	0	56.6779
RAD21	0.966654	0	0	56.6294
CRADD	0.74626	0	0	56.6073
CKAP5	0.656459	0	0	56.6073
KIF26B	0.582693	0	0	56.5603
PLAUR	2.143	0	0	56.5549
MIR181A2HG	1.12858	0	0	56.4791
IGF2BP1	0.983985	0	0	56.4721
PLAGL1	0.846132	0	0	56.4306
FAM227B	1.81641	0	0	56.4297
NLGN4X	0.578562	0	0	56.4283
H1-5	3.02897	0	0	56.4183
ASF1B	3.83409	0	0	56.4092
PROSER3	1.56244	0	0	56.4038
EPS15	0.88473	0	0	56.4016
NEK5	2.8122	0	0	56.3653
H2AZ2	1.27467	0	0	56.3248
FANCM	1.29884	0	0	56.3003
KCNK10	0.770865	0	0	56.1313
REXO5	1.69322	0	0	56.0202
TMEM63A	2.66782	0	0	55.9979
BAZ1A	0.779068	0	0	55.9772
LINC02388	3.02876	0	0	55.9733
ATP1B2	1.3604	0	0	55.905
VPS33B-DT	1.96813	0	0	55.8592
KMT5A	1.36122	0	0	55.7901
DGKB	0.999048	0	0	55.7347
DMRTA2	2.63321	0	0	55.7011
MASP1	1.07094	0	0	55.6905
PTH2R	2.15817	0	0	55.6378
KBTBD11-AS1	2.73249	0	0	55.6284
RNF169	0.667529	0	0	55.5851
CHRDL1	1.17027	0	0	55.5441
PKN3	3.34945	0	0	55.541
LRBA	0.693352	0	0	55.5106
ENSG00000290957	2.6721	0	0	55.4856
CYYR1	1.78344	0	0	55.4825
RPA1	1.20825	0	0	55.4776
DPY19L4	1.09561	0	0	55.4294
DDX12B	2.40993	0	0	55.404
SLITRK2	1.74198	0	0	55.3914
PACRG	0.818549	0	0	55.383
RFC1	0.962598	0	0	55.3728
MTSS2	0.888849	0	0	55.3718
C6orf118	1.80961	0	0	55.333
FBXO5	3.2616	0	0	55.2563
CSTPP1	0.53275	0	0	55.2124
GOLIM4	0.916731	0	0	55.1754
ENSG00000269825	0.754561	0	0	55.1491
FOXK1	0.779401	0	0	55.1206
NEK11	0.815	0	0	55.0961
TUBGCP3	0.715958	0	0	55.0618
CFAP299	1.63775	0	0	55.0159
EFS	1.10565	0	0	54.9374
SUCLG2-DT	2.18842	0	0	54.884
DLG5	0.610907	0	0	54.8644
GMNN	2.42588	0	0	54.8322
ANKRD20A4P	1.51979	0	0	54.8202
OLMALINC	1.21847	0	0	54.7144
DACH2	1.13635	0	0	54.6138
ENSG00000298065	1.17665	0	0	54.5808
LRRC1	0.937456	0	0	54.551
SPEN-AS1	1.08058	0	0	54.5156
NPHP1	1.53605	0	0	54.4782
TMEM132C	1.34348	0	0	54.3689
SNTB1	1.69263	0	0	54.3261
KIAA1671	1.0302	0	0	54.2854
FAM182A	1.34918	0	0	54.2819
LINC01727	3.42278	0	0	54.2699
CSPG5	1.35881	0	0	54.2621
FAM13A	0.58081	0	0	54.2076
ZNF732	2.37845	0	0	54.036
HMGCS1	0.772704	0	0	53.9978
EOMES	1.91101	0	0	53.9966
H1-2	2.09558	0	0	53.9884
CEP85	1.24686	0	0	53.9708
UBE2C	4.62715	0	0	53.9282
FAM120C	1.06469	0	0	53.8823
GRAMD2B	2.26358	0	0	53.8267
GPCPD1	0.747222	0	0	53.8004
HAUS8	1.92122	0	0	53.7942
TRIM56	2.65033	0	0	53.7617
SLC9A9	1.14706	0	0	53.7574
LIM2-AS1	3.80219	0	0	53.75
PTCH1	0.908073	0	0	53.68
PLK1	2.27457	0	0	53.6743
IFI44L	3.37216	0	0	53.6603
ITGA7	1.63997	0	0	53.641
DCLK2	0.525668	0	0	53.6101
DOK5	0.587986	0	0	53.6029
LINC01301	1.14601	0	0	53.5949
DDX60	2.68745	0	0	53.5526
ENSG00000287893	3.92382	0	0	53.5024
SDHAP3-1	0.764213	0	0	53.4783
RDX	0.688079	0	0	53.4771
IGSF9	1.05455	0	0	53.4743
GATAD2A	0.789685	0	0	53.4457
APCDD1	1.67976	0	0	53.4433
MAMDC2-AS1	0.842187	0	0	53.4399
ATN1	0.654662	0	0	53.4373
DLG1	0.545508	0	0	53.4198
KLHL25	0.690713	0	0	53.4068
RAMP1	2.21618	0	0	53.2986
NCAM2	0.532444	0	0	53.2556
REV3L	0.515568	0	0	53.213
ZSCAN5A	0.874915	0	0	53.1705
EFCAB11	1.1803	0	0	53.1434
TTC12	2.43591	0	0	53.1399
CD82	2.52792	0	0	53.1263
CKS2	3.407	0	0	53.0956
ENSG00000283782	0.834489	0	0	53.0413
DOCK7-DT	0.81237	0	0	53.0377
SRSF10	0.783435	0	0	53.0057
HMMR	3.42056	0	0	52.9793
WDR41	0.887262	0	0	52.9636
TRA2B	0.730423	0	0	52.9614
WARS2-AS1	0.780552	0	0	52.8968
XNDC1N	0.953225	0	0	52.8876
MORN1	1.25359	0	0	52.8802
CCDC138	0.722976	0	0	52.8621
CBFB	0.845091	0	0	52.7505
ASAP2	0.476441	0	0	52.7224
CDC14B	0.745347	0	0	52.6606
OTUD7B	0.927767	0	0	52.6548
RHPN2	2.23937	0	0	52.6216
HAT1	1.18039	0	0	52.5631
CENPQ	1.77617	0	0	52.4935
TBL1Y	1.72452	0	0	52.4814
BBOX1	3.69701	0	0	52.4299
CDKN3	3.56531	0	0	52.4082
BIRC5	3.91008	0	0	52.3598
LINC02614	0.747117	0	0	52.3083
RNF180	0.578075	0	0	52.3076
RASSF8	1.14703	0	0	52.2741
CTDSPL2	0.707463	0	0	52.2705
CASC17	3.0986	0	0	52.2333
DIXDC1	0.588511	0	0	52.2089
CNOT1	0.70928	0	0	52.2077
IFT74	1.02199	0	0	52.1867
SPAG17	1.59239	0	0	52.1652
NHERF1	2.82253	0	0	52.1513
FBXL5	0.675619	0	0	52.0594
SOX21-AS1	3.02103	0	0	52.0175
JADE1	0.933896	0	0	52.0162
MSN	1.49275	0	0	51.9875
MAP3K19	3.48912	0	0	51.985
NDRG2	1.41144	0	0	51.943
BRD8	0.836062	0	0	51.9374
DENND5A	0.573325	0	0	51.9208
PLIN3	2.63051	0	0	51.9177
RCN1	2.44378	0	0	51.9014
ZNF710	0.71037	0	0	51.8962
PAXIP1	0.879445	0	0	51.8633
ENSG00000253875	1.90455	0	0	51.8568
ENSG00000225096	1.5277	0	0	51.8535
LARP7	0.996659	0	0	51.8486
FRMD3-AS1	2.30426	0	0	51.8166
ZNF536	0.676275	0	0	51.742
CD38	2.91276	0	0	51.6944
PIMREG	4.16882	0	0	51.5963
CHKA	0.691611	0	0	51.5251
LIN9	1.05672	0	0	51.4453
DYRK1A	0.489516	0	0	51.4124
CCDC191	0.961571	0	0	51.4108
DRC1	2.25562	0	0	51.3921
LAMTOR5-AS1	0.853648	0	0	51.3806
MAGI3	0.482303	0	0	51.3474
RBMS2	1.11572	0	0	51.332
TPR	0.562536	0	0	51.2953
RAB8B	0.666693	0	0	51.285
STX8	0.621621	0	0	51.2828
ARHGEF17	0.87408	0	0	51.2805
KNSTRN	1.80727	0	0	51.1951
ATP1A1-AS1	1.56648	0	0	51.1696
ENSG00000308185	1.28613	0	0	51.1386
LRRIQ1	0.93466	0	0	51.113
FIRRM	1.26523	0	0	51.0895
LINC01266	1.8823	0	0	51.0741
ENSG00000285971	0.809769	0	0	51.0358
MTMR10	1.27921	0	0	51.0348
GINS4	3.38003	0	0	51.033
NDC1	1.14495	0	0	50.9591
STARD13	0.752247	0	0	50.8899
ENSG00000298515	3.13209	0	0	50.8857
ATOH8	2.63621	0	0	50.863
CLEC2D	0.989289	0	0	50.8607
TJP2	1.40879	0	0	50.8565
MBNL1	0.668009	0	0	50.8366
KDM2B	0.627039	0	0	50.8066
LINC00609	1.37065	0	0	50.7584
SEPHS1	1.29323	0	0	50.7339
WWC2	0.793382	0	0	50.7226
RAP2C-AS1	1.36054	0	0	50.7191
KDM3A	0.753589	0	0	50.6139
ENSG00000258520	1.89758	0	0	50.5945
PAGR1	1.12089	0	0	50.5697
TAFA5	0.442715	0	0	50.5504
PCM1	0.405993	0	0	50.5483
CDC42EP4	1.19029	0	0	50.5257
ENSG00000283380	1.05505	0	0	50.5167
RAB3GAP2	0.626428	0	0	50.5147
DDB2	1.25121	0	0	50.5025
AAMDC	0.955696	0	0	50.4986
NOX4	1.25399	0	0	50.4668
ENSG00000295993	2.34052	0	0	50.4195
RMI2	2.65909	0	0	50.4091
PTTG1	3.85504	0	0	50.3814
TNRC6A	0.393567	0	0	50.2802
SLC4A2	2.28039	0	0	50.2379
CEP72	1.29337	0	0	50.1935
DERA	1.2322	0	0	50.1662
CASP7	3.29473	0	0	50.1615
GKAP1	1.05762	0	0	50.1313
SLC12A9	1.18769	0	0	50.1069
CHD6	0.465723	0	0	50.0879
RILPL1	0.710101	0	0	50.0754
ENSG00000264808	2.68855	0	0	50.0631
RSRC1	0.678089	0	0	50.0127
ADD3	0.692861	0	0	49.9883
BORA	2.56478	0	0	49.9849
ENSG00000259713	1.17518	0	0	49.9697
DHDDS-AS1	1.36844	0	0	49.9362
GINS3	2.45865	0	0	49.8548
RBM39	0.505162	0	0	49.8447
MAP3K5	1.21252	0	0	49.8443
DARS1	0.977247	0	0	49.8387
ENSG00000288696	1.67534	0	0	49.8378
SLF1	0.740053	0	0	49.784
RANGAP1	1.06659	0	0	49.7666
GREB1L	1.25388	0	0	49.7379
VWA5B1	2.06242	0	0	49.7315
EXT1	0.438985	0	0	49.7112
ENSG00000267723	1.33162	0	0	49.6742
ZWINT	3.39402	0	0	49.6424
PABIR3	1.66578	0	0	49.6249
STK17B	2.88813	0	0	49.6034
ENSG00000250842	2.39976	0	0	49.5687
SMAD4	0.753394	0	0	49.5358
MIATNB	0.687928	0	0	49.5199
ERF	2.06538	0	0	49.4948
CASC2	1.39496	0	0	49.4939
PRTG	1.73111	0	0	49.4918
CREB3L2	1.34425	0	0	49.4838
FGF2	1.64304	0	0	49.4746
NMU	3.0262	0	0	49.4705
ARID1A	0.453849	0	0	49.3523
DUSP10	2.02181	0	0	49.3307
EXPH5	2.50969	0	0	49.3213
TSHZ1	1.10677	0	0	49.3055
TNFAIP8	1.92844	0	0	49.2839
DLL1	1.24783	0	0	49.2267
HNRNPA3	0.618155	0	0	49.2261
WSB1	0.482387	0	0	49.2017
PAWR	1.29368	0	0	49.1636
ST8SIA1	0.572221	0	0	49.062
ENSG00000259280	2.08777	0	0	49.0528
SDHAP3	0.853854	0	0	49.0284
GYG2	1.41525	0	0	49.0092
KIF5B	0.618707	0	0	48.954
IFT80	0.73636	0	0	48.9258
SRSF6	0.774566	0	0	48.916
CFAP52	3.48155	0	0	48.9119
HNRNPU	0.45272	0	0	48.9035
SOX2-OT	0.582574	0	0	48.8644
DNAJC9	0.841246	0	0	48.8577
SPRED1	0.661896	0	0	48.8423
LINC00881	1.51511	0	0	48.791
ENSG00000286456	2.4481	0	0	48.743
AMZ1	1.20021	0	0	48.7361
DPH6	0.716118	0	0	48.7348
HHAT	1.25339	0	0	48.6714
ANXA2	2.40807	0	0	48.6504
ADGRL1-AS1	1.41594	0	0	48.6293
GALM	2.46897	0	0	48.6214
POLH	0.856684	0	0	48.6086
AIM2	0.87302	0	0	48.5619
ENSG00000295873	3.44546	0	0	48.5286
FYB2	3.13586	0	0	48.4709
ENSG00000286387	3.13707	0	0	48.4403
CHD4	0.642724	0	0	48.4236
RFWD3	1.20742	0	0	48.4022
TNS3	0.846312	0	0	48.3219
C2orf72	1.32495	0	0	48.2821
HDAC1	1.23919	0	0	48.2741
PLIN5	2.06622	0	0	48.2612
HGF	2.72793	0	0	48.2578
ZNF516	0.617232	0	0	48.2541
TAPT1-AS1	0.722206	0	0	48.2488
NPHP3	0.983188	0	0	48.2433
TOB2	1.02353	0	0	48.1907
HNRNPH1	0.48523	0	0	48.1893
PRKD2	1.13466	0	0	48.1719
ANKRD11	0.37403	0	0	48.1534
PTPN14	1.63066	0	0	48.1233
SEZ6L	0.486856	0	0	48.103
LINC03021	1.15857	0	0	48.1004
ZIC1	1.82728	0	0	48.0963
MEF2B	1.24552	0	0	48.0787
DIAPH2	0.672001	0	0	48.072
PARP9	2.60497	0	0	48.0671
ARHGEF10	0.599714	0	0	48.0265
ODF2	0.842045	0	0	47.9923
IQSEC1	0.546221	0	0	47.9919
MCM2	2.65524	0	0	47.8847
CDC25A	2.65	0	0	47.8728
ENSG00000307600	3.23252	0	0	47.8263
RGS5	1.25371	0	0	47.8184
TRIM2	0.374305	0	0	47.8177
ENSG00000231604	2.88191	0	0	47.8107
ENSG00000249526	1.451	0	0	47.7974
ATP10D	1.16899	0	0	47.7766
ENSG00000189229	1.40312	0	0	47.7753
INVS	0.563827	0	0	47.7731
CEP70	0.764061	0	0	47.6928
HCG22	3.29117	0	0	47.6121
FBLN1	0.6794	0	0	47.5928
ETV5	1.04319	0	0	47.5432
KBTBD12	1.56246	0	0	47.504
KCNH7	0.420409	0	0	47.5034
CYP20A1	0.911184	0	0	47.4957
ENSG00000237076	2.54707	0	0	47.4771
LRRTM3	0.676566	0	0	47.45
CC2D2A	0.652649	0	0	47.319
PPP6R3	0.430289	0	0	47.3072
C18orf54	1.69136	0	0	47.3051
LMF1	0.584537	0	0	47.263
NOTCH2NLB	3.26996	0	0	47.2531
RHOXF1	1.00847	0	0	47.2497
PPARGC1A	1.48308	0	0	47.1819
NRF1	0.602149	0	0	47.1139
WASF2	0.707446	0	0	47.1025
SRBD1	0.768999	0	0	47.0997
ENSG00000207751	1.20825	0	0	47.0842
NUMA1	0.54201	0	0	47.0673
DDR1	0.943192	0	0	47.0642
ENSG00000239920	1.65973	0	0	47.0415
PER3	1.19108	0	0	46.9942
VWA3B	2.60081	0	0	46.9908
IMPA2	1.80546	0	0	46.9806
KCNT2	0.517209	0	0	46.9398
ZBBX	1.50122	0	0	46.9396
ZNF528-AS1	0.794868	0	0	46.9238
DNAJB1	1.42577	0	0	46.917
DNAH12	1.91018	0	0	46.8876
ZFP36L2	2.63896	0	0	46.8865
PPP1CB	0.707896	0	0	46.8553
PDCD4	0.84034	0	0	46.8219
STXBP3	1.17291	0	0	46.8042
SMAD9	0.925073	0	0	46.7936
TOX3	0.511371	0	0	46.7921
POLD1	1.46496	0	0	46.7903
CRYBG3	1.35033	0	0	46.7824
DNHD1	0.982626	0	0	46.7722
ORC1	2.55908	0	0	46.7206
FREM2	1.8994	0	0	46.6263
VOPP1	0.540765	0	0	46.5719
TMEM51	1.88033	0	0	46.5163
FABP7	1.25222	0	0	46.4806
TTC6	1.91435	0	0	46.476
PMFBP1	1.68699	0	0	46.4368
PPP1R42	2.09699	0	0	46.3462
CASP8AP2	0.686732	0	0	46.3365
HIPK2	0.469161	0	0	46.3099
HTRA1	1.11018	0	0	46.3049
LGR6	2.99711	0	0	46.2963
ENSG00000259460	0.722452	0	0	46.294
MDC1	0.825983	0	0	46.2838
TMPRSS5	1.70017	0	0	46.2342
SHMT1	1.37841	0	0	46.2342
B3GALT5	1.21344	0	0	46.2239
TSC22D2	0.690884	0	0	46.2177
MDM1	1.26303	0	0	46.1814
PPARA	0.958461	0	0	46.1782
DHFR	1.63479	0	0	46.1688
ENSG00000294456	1.35497	0	0	46.1496
HERC6	2.49384	0	0	46.1454
AJUBA	3.63212	0	0	46.1226
ENSG00000243620	1.39787	0	0	46.1166
NUP214	0.583596	0	0	46.0389
USH1C	3.16274	0	0	46.0317
EAF2	1.81889	0	0	46.0097
DELEC1	1.86257	0	0	45.9867
LINC00391	3.53309	0	0	45.977
DPH6-DT	1.13468	0	0	45.9559
CREBBP	0.429074	0	0	45.9317
FUT10	1.16642	0	0	45.904
SNX5	0.814688	0	0	45.8555
DYNC2I2	1.52438	0	0	45.8444
NBPF8	1.16511	0	0	45.8174
DNMT1	0.58175	0	0	45.7613
UGGT2	0.465821	0	0	45.6509
CD44	2.80769	0	0	45.5874
AKNA	1.04796	0	0	45.5738
KIAA1755	1.30701	0	0	45.5594
ENSG00000233967	0.877744	0	0	45.5101
ADGRA1	1.2371	0	0	45.4342
CCNA2	2.03299	0	0	45.4264
ENSG00000309593	2.07886	0	0	45.407
TTLL5	0.491584	0	0	45.3908
SESN3	0.711935	0	0	45.3748
FAM167A	2.37616	0	0	45.3733
DPY19L2P2-1	1.42795	0	0	45.3263
DDX60L	1.94306	0	0	45.3158
PTPRA	0.424158	0	0	45.3091
NID1	1.67488	0	0	45.2967
HMGN5	1.59654	0	0	45.244
ENSG00000256673	3.42635	0	0	45.2434
KDM6A	0.497982	0	0	45.2222
VPS37B	0.667418	0	0	45.2122
DNAI3	2.98057	0	0	45.2067
SPRY2	1.59408	0	0	45.1925
PKMYT1	3.15468	0	0	45.1837
PIK3C2A	0.57468	0	0	45.1715
SPEF2	1.0285	0	0	45.1521
MAGT1	1.33609	0	0	45.1261
CYP39A1	2.36292	0	0	45.1179
BTG3	1.39487	0	0	45.1139
PPM1D	0.847637	0	0	45.0743
RASA3	0.584339	0	0	45.0366
ANKRD26	0.500795	0	0	45.0337
SUGP2	0.485735	0	0	45.0252
CAPS2	1.17598	0	0	45.025
NUP107	0.769619	0	0	45.0104
ZNF609	0.367344	0	0	44.9952
SAPCD1	2.72774	0	0	44.9563
PPP2R5C	0.472296	0	0	44.943
KLHL13	0.992432	0	0	44.9062
NTNG2	0.994062	0	0	44.8936
DMTF1	0.490587	0	0	44.8833
HTR2A	2.0256	0	0	44.7319
SMC1A	0.601759	0	0	44.7227
SF1	0.683585	0	0	44.6368
DKK3	0.708816	0	0	44.6346
DNAI7	1.55934	0	0	44.6085
FAM227A	0.761002	0	0	44.6025
UFL1-AS1	1.0146	0	0	44.5619
CGGBP1	0.902448	0	0	44.5535
TTC29	2.26056	0	0	44.5481
FRYL	0.428538	0	0	44.545
SCRIB	0.892682	0	0	44.5271
ZNF726	1.91865	0	0	44.5116
NEK2	4.12144	0	0	44.4121
LINC01088	1.41033	0	0	44.3925
SLC6A11	0.847267	0	0	44.3793
TALAM1	0.392335	0	0	44.3716
LIN52	0.730457	0	0	44.3642
LOXL1	1.87008	0	0	44.2902
NRG1	0.391533	0	0	44.2047
ACTB	0.740046	0	0	44.1923
GTF2A1L	2.07315	0	0	44.1787
TMEM161B-DT	0.401065	0	0	44.1591
SORT1	0.592193	0	0	44.1569
PARVA	1.00806	0	0	44.1513
IFI27L1	1.30117	0	0	44.1143
TAOK3	0.467271	0	0	44.0897
CHD1-DT	0.742496	0	0	43.9916
HSPA1B	1.88322	0	0	43.9649
TOPBP1	0.743	0	0	43.9197
TCF12	0.371128	0	0	43.9088
PRPSAP1	0.665657	0	0	43.9014
SP1	0.981428	0	0	43.8932
TRERF1	0.515768	0	0	43.8719
MDFI	2.27064	0	0	43.8398
GPC1	0.576493	0	0	43.8369
ENSG00000295797	2.62495	0	0	43.8203
CENPH	1.99107	0	0	43.8049
TSHR	2.06821	0	0	43.8025
EPB41L4A	0.495611	0	0	43.7517
TAF8	1.4092	0	0	43.7401
ENSG00000302412	3.27464	0	0	43.7285
GUCY1B2	2.09055	0	0	43.7121
PTGES3	0.729541	0	0	43.6946
PAXBP1	0.506994	0	0	43.6855
LINC02925	2.74893	0	0	43.6709
MAP3K1	0.981251	0	0	43.6626
LINC00648	2.33593	0	0	43.6603
ZMYM1	0.823162	0	0	43.6332
HIP1	0.473855	0	0	43.61
CTNNB1	0.587558	0	0	43.5698
TGIF1	2.34744	0	0	43.4761
PTGR3	1.14633	0	0	43.4758
THOC2	0.465723	0	0	43.4411
TTC8	1.20237	0	0	43.4381
ADAM9	0.861587	0	0	43.4371
ITPR2	0.604883	0	0	43.429
ITGAV	0.750646	0	0	43.4236
LINC02664	1.15326	0	0	43.3796
HNRNPR	0.481411	0	0	43.3716
ENSG00000287578	1.67703	0	0	43.3667
FLJ16779	2.51141	0	0	43.3466
ENSG00000234418	3.35354	0	0	43.3333
BUB3	1.25274	0	0	43.3324
KLF15	2.99686	0	0	43.3312
DNAAF1	2.90017	0	0	43.309
METRN	2.89257	0	0	43.3031
PABIR2	1.44203	0	0	43.292
RANBP3L	2.67845	0	0	43.2917
TRIM59	2.25142	0	0	43.2722
MERTK	1.48762	0	0	43.2688
ADGRG6	1.12086	0	0	43.2636
DDR2	1.49648	0	0	43.2484
XRCC4	0.98227	0	0	43.2288
ANXA5	1.9075	0	0	43.1994
RIBC2	2.84076	0	0	43.1851
SPDYA	0.794535	0	0	43.1688
ATXN2-AS	0.854781	0	0	43.1003
CLCN5	1.35793	0	0	43.0922
AHNAK	1.59576	0	0	43.0866
SEPTIN11	0.381766	0	0	43.0485
RSPH1	3.00221	0	0	42.9831
TRAM2	1.34151	0	0	42.9619
PHF21A	0.422343	0	0	42.9529
SLC7A11	1.53625	0	0	42.9254
ANGPT1	1.99403	0	0	42.9069
CENPL	2.20583	0	0	42.8693
CHD1L	0.880823	0	0	42.862
PDE8B-1	0.805767	0	0	42.8171
CFAP77	2.43426	0	0	42.8094
CDC20	4.40263	0	0	42.7951
PHF11	1.98387	0	0	42.7855
LMO1	1.21196	0	0	42.6786
FABP5	1.34954	0	0	42.6748
SHC3	0.482124	0	0	42.6677
ZNF75D	0.907422	0	0	42.653
MAPK15	1.66535	0	0	42.6299
DUT-AS1	2.66423	0	0	42.6112
G2E3	0.596414	0	0	42.5865
NUP205	0.704643	0	0	42.5642
FOXN2	0.762831	0	0	42.5285
CHAF1B	1.96354	0	0	42.4995
CCDC144CP	0.756673	0	0	42.4707
ENSG00000295881	3.05797	0	0	42.4499
DCP2	0.768015	0	0	42.4455
TRABD2B	2.42263	0	0	42.4434
ERICH6-AS1	1.74285	0	0	42.4348
GJC1	0.587086	0	0	42.3755
ENSG00000259732	3.28157	0	0	42.3713
AHI1-DT	1.18573	0	0	42.3289
ASB3	0.469004	0	0	42.3214
HELLPAR	2.32644	0	0	42.2904
USP1	1.06705	0	0	42.278
LATS2	1.13994	0	0	42.278
TCTN1	0.901886	0	0	42.2417
SLF2	0.578296	0	0	42.2365
PMP22	2.29156	0	0	42.1961
FANCL	0.643395	0	0	42.1862
CEP295	0.54942	0	0	42.1251
NHLRC2	0.602511	0	0	42.125
ADAMTS9-AS2	0.933767	0	0	42.065
ZFHX4-AS1	1.10358	0	0	42.0562
ENSG00000294743	2.81766	0	0	42.0448
ENSG00000302932	1.84504	0	0	42.0332
RCC2	0.690843	0	0	42.0026
ENSG00000290576	2.86957	0	0	41.9837
CHD1	0.519323	0	0	41.935
WDR35	0.751835	0	0	41.9114
MTMR11	2.68488	0	0	41.9102
ADGB	3.07455	0	0	41.8906
CCDC134	1.06502	0	0	41.8903
NAP1L1	0.49622	0	0	41.8657
ATP6V0D1-DT	0.901871	0	0	41.8534
ENSG00000291067	1.77124	0	0	41.833
ANKRD17-DT	0.875946	0	0	41.8319
PHYKPL	0.607866	0	0	41.8035
SIRPA	1.32982	0	0	41.8026
COL5A2	1.35494	0	0	41.7938
CNMD	2.6374	0	0	41.7902
COL5A3	2.11799	0	0	41.7623
G3BP1	0.728513	0	0	41.7574
TGFB2	0.967585	0	0	41.7197
ENSG00000282890	1.38838	0	0	41.6899
JAG1	1.34804	0	0	41.6753
LINC01331	1.60862	0	0	41.645
LINC02200	3.49181	0	0	41.6364
LINC03073	0.851198	0	0	41.6336
ARMCX4	0.542398	0	0	41.6247
MCM6	1.36618	0	0	41.5392
ENSG00000293324	0.640551	0	0	41.5352
KDM2A	0.397893	0	0	41.5351
PTGFRN	0.668661	0	0	41.5254
HSPA1A	1.65708	0	0	41.5015
CKB	0.926629	0	0	41.4964
ANO6	0.612059	0	0	41.4635
PPP4R1L	1.79144	0	0	41.3119
NCOR2	0.392908	0	0	41.3029
AJUBA-DT	2.65842	0	0	41.2943
MIR130AHG	1.15041	0	0	41.2846
TMEM131	0.397441	0	0	41.2524
CFAP45	3.71703	0	0	41.2258
SYTL4	2.06019	0	0	41.1791
ZBTB7C	0.885045	0	0	41.1615
SGO1-AS1	1.15957	0	0	41.1476
ENSG00000253374	1.94371	0	0	41.1224
LINC02284	0.975474	0	0	41.1091
ADD1	0.412449	0	0	41.1088
LINC02207	2.16267	0	0	41.0615
CFAP157	3.72117	0	0	41.0587
MAD1L1	0.448664	0	0	41.0248
RBM15	1.03799	0	0	40.9998
TTLL4	0.953635	0	0	40.9603
SCN5A	1.91876	0	0	40.9446
RASGRP1	0.980787	0	0	40.931
TMEM220-AS1	1.26092	0	0	40.9061
IKBIP	1.02392	0	0	40.8934
RASSF10-DT	3.4102	0	0	40.8903
TPM2	1.60728	0	0	40.8873
FBXL13	1.0375	0	0	40.8812
PRRC2A	0.509408	0	0	40.8719
LIN54	0.781157	0	0	40.8659
HSP90B1	0.711382	0	0	40.8652
MIDEAS	0.820861	0	0	40.8536
PRP4K	0.517018	0	0	40.785
SPEN	0.402767	0	0	40.7683
TMEM123	0.832051	0	0	40.7412
H3-3B	1.1515	0	0	40.7199
CFAP300	2.4354	0	0	40.6822
LRRC37A4P	0.619528	0	0	40.68
SALL2	1.93838	0	0	40.6724
KPNB1	0.541667	0	0	40.6577
RBBP8	1.04627	0	0	40.651
EFHD2	2.13499	0	0	40.6308
MAGI2-AS3	1.06625	0	0	40.6207
DNAJB6	0.577879	0	0	40.5872
INHBB	2.29673	0	0	40.5849
TRAIP	1.64848	0	0	40.5827
ZDHHC13	0.715106	0	0	40.5736
AMMECR1	0.868521	0	0	40.5441
FNBP4	0.429181	0	0	40.5255
LINC01563	1.11565	0	0	40.5017
CCDC170	2.19114	0	0	40.5016
EME1	3.3175	0	0	40.4546
WWTR1	0.979028	0	0	40.4356
SLC38A3	2.22041	0	0	40.4335
WDR27	0.523301	0	0	40.4203
DHX9	0.475883	0	0	40.3238
CCNE2	2.31386	0	0	40.3196
ZNF704	0.376288	0	0	40.3167
DNAI4	1.02082	0	0	40.3134
ADORA2B	2.57021	0	0	40.286
TRIP13	1.90658	0	0	40.267
SGK3	0.850428	0	0	40.2577
CDCA4	1.57672	0	0	40.2506
CTXND1	2.01282	0	0	40.2486
OTX1	1.95413	0	0	40.244
SKA1	3.81794	0	0	40.2283
FBXO17	0.879408	0	0	40.1742
SLC35G2	0.985353	0	0	40.1693
ENSG00000306967	0.863682	0	0	40.1613
ELOVL5	0.636289	0	0	40.1445
CSTF3-DT	1.96531	0	0	40.1169
OSTM1	0.875576	0	0	40.0942
ENSG00000308602	2.89378	0	0	40.0931
PLEKHA8	0.56032	0	0	40.0793
GMPR	2.53307	0	0	40.0764
SMAD5	0.828604	0	0	40.0716
CTDSP2	0.747037	0	0	40.0561
MAD2L1-DT	1.21683	0	0	40.0178
SASS6	1.07937	0	0	40.0083
IPO9	0.467707	0	0	40.0023
ENSG00000259275	2.33839	0	0	39.9981
ASXL2	0.591006	0	0	39.998
NCAN	0.403653	0	0	39.9957
RHPN1	1.57156	0	0	39.9927
SAPCD2	2.90252	0	0	39.988
LINC01967	1.94032	0	0	39.9821
CHMP4B	0.869809	0	0	39.9761
EIF4G3	0.304389	0	0	39.9518
NAP1L4	0.44877	0	0	39.9357
ADAM33	2.31306	0	0	39.9124
MTA1	0.510416	0	0	39.8847
ZNF621	1.00812	0	0	39.876
TMTC1	0.514622	0	0	39.8717
TMX1	1.19788	0	0	39.7718
CFAP70	1.50738	0	0	39.77
PHACTR2	0.661261	0	0	39.7434
IFT88	0.571731	0	0	39.7238
TSC22D1	0.392629	0	0	39.7184
TRAF2	0.942126	0	0	39.7119
WAC	0.436102	0	0	39.7118
FOXO1	1.08654	0	0	39.6652
SAE1	0.604954	0	0	39.6642
USP40	0.689638	0	0	39.6613
TAPBP	1.47861	0	0	39.6561
DNAJC24	0.901199	0	0	39.618
TEAD3	2.57913	0	0	39.5843
TTI1	0.760269	0	0	39.5675
CDC6	2.51134	0	0	39.5401
DYNLT5	2.88354	0	0	39.4806
TP53BP2	0.781279	0	0	39.4493
STON1-GTF2A1L	1.90142	0	0	39.4426
DRC3	1.81413	0	0	39.4393
ZC3H7A	0.52824	0	0	39.4351
ANP32A	0.499207	0	0	39.425
PCBP2	0.546989	0	0	39.3663
RBBP6	0.485644	0	0	39.3596
TBC1D31	0.774461	0	0	39.3421
NUP43	1.02707	0	0	39.3199
SRSF5	0.559348	0	0	39.3195
ENSG00000293076	0.534872	0	0	39.2784
RXRA	0.770105	0	0	39.277
RBBP7	0.897668	0	0	39.2574
LRR1	2.48326	0	0	39.2322
ATP8B1-AS1	0.702818	0	0	39.2258
DTNA	0.451157	0	0	39.182
VAV2	0.375191	0	0	39.1534
NKD1	1.06228	0	0	39.137
FBXO43	3.11577	0	0	39.1368
NAA38	0.905203	0	0	39.1244
HAPLN3	3.04157	0	0	39.014
QSER1	0.484282	0	0	38.999
GOLGA2P5	2.81753	0	0	38.993
CNTNAP3B	0.6924	0	0	38.988
CFAP73	3.18058	0	0	38.9708
DDX39A	1.12893	0	0	38.9678
EGF	2.95675	0	0	38.9603
HMG20B	1.76139	0	0	38.9585
MMP14	2.13842	0	0	38.8981
MYO9B	0.388986	0	0	38.8822
FREM1	1.03881	0	0	38.864
NFIB	0.299334	0	0	38.8266
HROB	2.25951	0	0	38.7853
SFMBT1	0.55792	0	0	38.7698
LPAR4	2.88261	0	0	38.751
DYRK4	1.83063	0	0	38.7282
CFAP61	1.20426	0	0	38.7005
OR51B5	1.46148	0	0	38.6863
HNRNPUL1	0.546488	0	0	38.6724
ENSG00000275297	0.613968	0	0	38.6495
MCM4	1.34643	0	0	38.6259
GSTM5	1.83155	0	0	38.6227
ZIC5	2.91267	0	0	38.6182
KDM2B-DT	1.1074	0	0	38.6033
TOM1L2	0.42174	0	0	38.5997
RAB28	0.468373	0	0	38.5629
ENSG00000248994	1.74768	0	0	38.5614
TFCP2	0.475884	0	0	38.5352
ARHGEF10L	0.432788	0	0	38.5343
ENSG00000259363	0.722335	0	0	38.5327
SLC13A5	3.56252	0	0	38.5248
SLC3A2	0.912436	0	0	38.4824
MIB1	0.36624	0	0	38.4807
TBCD	0.362681	0	0	38.4715
BTAF1	0.474898	0	0	38.4456
NUP98	0.51706	0	0	38.4284
KLC1	0.345204	0	0	38.4234
ARAP3	0.894082	0	0	38.3867
SAT1	1.02592	0	0	38.385
CDC42SE2	0.503777	0	0	38.3845
CYP26B1	2.36563	0	0	38.3728
PHLDA1	1.27779	0	0	38.3677
GRIK1	0.666516	0	0	38.3438
FAM184B	0.717171	0	0	38.3244
GNG7	0.624784	0	0	38.3234
H2BC21	2.0372	0	0	38.3089
APOL2	2.26054	0	0	38.2814
TPCN1	0.918319	0	0	38.2631
PKM	0.753345	0	0	38.2569
GLI1	3.88198	0	0	38.2555
CCDC80	2.97145	0	0	38.2514
PIP5K1A	0.481793	0	0	38.2475
NR2F2-AS1	0.783623	0	0	38.2345
CDK6-AS1	2.76739	0	0	38.1872
LDHA	1.48537	0	0	38.1853
GNG12-AS1	1.40413	0	0	38.1676
KCTD15	0.888256	0	0	38.1517
ENSG00000232930	3.21842	0	0	38.1303
MIR1915HG	1.80109	0	0	38.1144
INKA2	1.49649	0	0	38.0983
JUND	1.48293	0	0	38.0819
TNPO2	0.594974	0	0	38.0741
ADAMTS17	0.793805	0	0	38.0491
CAPN2	0.669669	0	0	38.0398
HNRNPL	0.582655	0	0	38.0384
RB1	0.477914	0	0	37.9895
COG4	0.647535	0	0	37.9751
DNAJC1	0.44964	0	0	37.9596
ENSG00000286830	2.08789	0	0	37.9338
POT1	0.720443	0	0	37.9152
VENTXP1-1	2.18131	0	0	37.9106
BRD4	0.400604	0	0	37.9018
SYT11	0.558721	0	0	37.8901
ASXL1	0.43562	0	0	37.8516
KBTBD6-DT	1.39304	0	0	37.8452
UBXN11	1.15085	0	0	37.836
PLD2	1.09443	0	0	37.831
KIAA1328	0.372323	0	0	37.8274
FADS2	0.44784	0	0	37.8072
WDFY3	0.340728	0	0	37.7859
CCHCR1	1.1729	0	0	37.7845
TYMSOS	2.34255	0	0	37.7773
ENSG00000296499	2.47033	0	0	37.7772
PPP2R5A	0.918274	0	0	37.7518
SIPA1L2	0.458013	0	0	37.7222
LINC00402	1.98898	0	0	37.7156
SLC35D1	0.678869	0	0	37.6907
CEP44	0.790765	0	7.05934e-308	37.6306
ENSG00000298294	1.86112	2.4063e-308	1.91679e-307	37.622
ENSG00000289095	1.27556	2.94107e-308	2.34196e-307	37.6067
RBM23	0.857115	4.4432e-308	3.53687e-307	37.5884
PPP6R2	0.33889	4.64381e-308	3.69528e-307	37.5823
ITGB4	3.146	4.89111e-307	3.88266e-306	37.5603
TK1	3.41421	5.77726e-307	4.58453e-306	37.5593
ENSG00000282142	1.18884	1.66255e-307	1.32113e-306	37.5583
INTS3	0.52695	3.18745e-307	2.53201e-306	37.5321
LINC02580	1.95688	8.9935e-307	7.13185e-306	37.5269
ENSG00000287704	1.19916	8.28658e-307	6.57352e-306	37.5182
ENSG00000296113	3.89953	5.21353e-306	4.12579e-305	37.5035
ENSG00000249240	1.27173	1.57782e-306	1.24906e-305	37.4992
ANXA2R-OT1	1.13369	8.71336e-306	6.89069e-305	37.451
ZNF331	0.7529	7.24625e-306	5.73244e-305	37.4505
ENSG00000309620	0.872693	8.99304e-306	7.10941e-305	37.4462
CRNDE	1.23545	1.55319e-305	1.22661e-304	37.435
MYH14	1.14996	6.03827e-305	4.76534e-304	37.3984
PPP1CB-DT	2.24962	3.37818e-304	2.66237e-303	37.3713
ENSG00000291175	0.503027	1.50415e-304	1.18625e-303	37.3666
ENSG00000310376	0.408674	1.8503e-304	1.45873e-303	37.3596
TTC38	1.64883	1.17537e-303	9.25681e-303	37.3275
GPBP1L1	0.505779	8.84795e-304	6.97075e-303	37.3186
EPCIP-AS1	1.00829	1.32352e-303	1.042e-302	37.3141
LRP10	2.83974	4.10646e-303	3.22749e-302	37.3128
CPXM2	2.01821	3.30397e-303	2.59854e-302	37.3073
TTC3P1	1.08039	3.67648e-303	2.89053e-302	37.2875
RBM25	0.313422	3.06969e-303	2.41511e-302	37.2839
PLAG1	1.08747	7.28878e-303	5.72669e-302	37.2682
C1RL	1.41781	1.65092e-302	1.29533e-301	37.252
SRSF4	0.447191	1.13152e-302	8.88411e-302	37.2494
MRE11	0.650227	1.32862e-302	1.04281e-301	37.247
ENSG00000291336	1.3359	6.27531e-302	4.91866e-301	37.2142
SLTM	0.417864	4.33783e-302	3.4012e-301	37.2129
IL6ST	1.22023	3.9042e-301	3.05599e-300	37.1618
ENSG00000227885	2.14888	7.63673e-301	5.9715e-300	37.161
TECPR2	0.481057	3.2236e-301	2.52411e-300	37.1592
GRB14	0.887357	4.50775e-301	3.52721e-300	37.156
ATXN2	0.339341	9.41366e-301	7.35596e-300	37.1293
CDCA5	3.29041	6.6864e-300	5.21244e-299	37.1171
TBC1D22B	0.750481	2.20638e-300	1.72234e-299	37.11
TTLL3	0.58778	6.31817e-300	4.92706e-299	37.0796
ENSG00000229983	3.49954	3.25014e-299	2.52853e-298	37.077
FOXP4	0.645777	1.7497e-299	1.36307e-298	37.0518
FGF1	2.02619	4.49921e-299	3.49791e-298	37.0491
N4BP2L1	1.03142	2.62115e-299	2.04058e-298	37.0475
SLC6A9	1.00586	1.44053e-298	1.11919e-297	36.9999
TAF15	0.39867	3.57964e-298	2.77924e-297	36.9683
CTNND1	0.378888	4.0399e-298	3.13447e-297	36.9648
TRAF3IP2-AS1	0.357611	4.72572e-298	3.66534e-297	36.9604
RORA-AS1	1.29268	9.89463e-298	7.67184e-297	36.9517
MAP7D3	2.37281	6.12935e-297	4.74921e-296	36.9185
ENSG00000273329	1.03669	7.98193e-297	6.18257e-296	36.8909
KAT6A	0.368019	9.43735e-297	7.30743e-296	36.8789
LINC03006	0.575194	1.06517e-296	8.24498e-296	36.8773
ENSG00000290482	0.942863	1.85287e-296	1.43373e-295	36.8676
UBE2T	1.83785	3.20057e-296	2.4749e-295	36.865
HAUS5	0.9282	2.77645e-296	2.14766e-295	36.8553
POT1-AS1	0.497728	6.84105e-296	5.28819e-295	36.8255
TSC22D4	1.3874	2.34349e-295	1.81032e-294	36.8035
PLTP	1.90551	3.94076e-295	3.04113e-294	36.7978
EEF1AKMT2	0.491336	2.48473e-295	1.91878e-294	36.7906
CEP97	0.490845	9.53941e-295	7.35673e-294	36.7538
BRD2	0.60943	1.49964e-294	1.15613e-293	36.7423
ILK	0.965707	3.39569e-294	2.61698e-293	36.7243
TENT4A	0.500945	3.75122e-294	2.89001e-293	36.7164
CFAP99	3.20737	2.48241e-293	1.90866e-292	36.7049
PLSCR1	2.0687	1.89247e-293	1.45653e-292	36.6945
ARHGEF39	3.36371	4.12491e-293	3.17048e-292	36.6891
CWF19L2	0.471825	1.16721e-293	8.98638e-293	36.6848
TJAP1	0.943425	2.24395e-293	1.72589e-292	36.6719
PKD2	0.406972	9.06522e-293	6.9607e-292	36.6283
FZD2	2.58084	3.74287e-292	2.87011e-291	36.6195
ENSG00000283269	3.25053	2.27995e-291	1.74599e-290	36.5789
AEBP1	1.36856	2.09423e-291	1.60483e-290	36.5534
MDM4	0.452556	1.35995e-290	1.04111e-289	36.4906
FGFBP3	1.30895	2.02946e-290	1.5521e-289	36.4904
LRP2	1.50346	3.04167e-290	2.3239e-289	36.4824
HDAC4	0.323705	1.98095e-290	1.5155e-289	36.4795
ZIC2	1.97264	1.14517e-289	8.73478e-289	36.4519
NIPBL	0.332423	5.67434e-290	4.33243e-289	36.4506
ZNF544	0.391255	5.90795e-290	4.5093e-289	36.4498
NCOR1	0.326799	6.52075e-290	4.97537e-289	36.4467
TTPA	3.14646	4.07261e-289	3.10228e-288	36.4342
MAPK10	0.333814	2.05563e-289	1.56742e-288	36.4149
CIRBP	0.588017	2.29369e-289	1.74836e-288	36.4139
ERI3	0.371394	3.13079e-289	2.38564e-288	36.4037
ZDHHC1	1.44314	1.03543e-288	7.88208e-288	36.3839
LRRC17	1.4168	1.85507e-288	1.41122e-287	36.3669
FDFT1	0.472536	1.37051e-288	1.04294e-287	36.3634
PKN2	0.357196	1.93832e-288	1.47357e-287	36.3532
VANGL1	1.40769	5.36935e-288	4.07655e-287	36.3369
NOD1	1.39578	5.80113e-288	4.40293e-287	36.335
ENSG00000287021	2.93957	2.16393e-287	1.64129e-286	36.3212
ESYT1	1.04094	1.59461e-287	1.20988e-286	36.3023
SAP30L-AS1	1.20784	3.53295e-287	2.67789e-286	36.282
CAMK2D	0.451884	2.72993e-287	2.0699e-286	36.2802
ANKRD20A1	1.5146	2.5394e-286	1.92291e-285	36.2321
ELN	1.58374	3.53534e-286	2.67618e-285	36.2245
XRCC3	1.58116	1.24073e-285	9.389e-285	36.1891
SLC9A3-AS1	0.899996	3.26694e-285	2.47137e-284	36.1519
ENSG00000294469	1.05029	3.95131e-285	2.98712e-284	36.1507
TOGARAM2	2.30664	9.84464e-285	7.43749e-284	36.1459
FAM27C	0.828131	5.28901e-285	3.99709e-284	36.1381
INSIG1	1.02625	9.88767e-285	7.46755e-284	36.1246
MIR3681HG	1.38831	2.14582e-284	1.62007e-283	36.1086
DCAF8	0.569856	9.23795e-284	6.96999e-283	36.0554
SUCO	0.527963	1.15059e-283	8.67832e-283	36.049
NR2F1	0.53355	3.8959e-283	2.93655e-282	36.0149
CHST10	0.684475	7.02525e-283	5.29356e-282	36
EMID1	0.436652	8.90977e-283	6.71136e-282	35.9914
LINC02666	1.27745	2.85585e-282	2.15049e-281	35.9683
AOPEP	0.353822	6.87514e-282	5.17368e-281	35.9336
CEP350	0.386484	1.10439e-281	8.30804e-281	35.9204
KIAA0319L	0.414146	1.3124e-281	9.86958e-281	35.9158
LINC02198	1.62403	1.31554e-280	9.87709e-280	35.8668
CIMIP2C	3.34307	4.1814e-280	3.13325e-279	35.8572
FIGNL2	1.57196	2.56438e-280	1.92408e-279	35.8478
WDR90	1.02914	2.74426e-280	2.05837e-279	35.8367
PCYT1B	0.770124	2.81897e-280	2.11372e-279	35.8329
SF3B3	0.547576	3.41199e-280	2.55755e-279	35.8254
MCM9	0.810154	6.84275e-280	5.12082e-279	35.8085
CORO1C	0.461488	1.61779e-279	1.20989e-278	35.781
UBR5	0.294248	1.98436e-279	1.48356e-278	35.7744
ENSG00000260167	0.988458	4.76473e-279	3.55993e-278	35.7557
ENSG00000296591	0.874387	2.68687e-278	2.00617e-277	35.7064
IRF3	1.57366	4.71632e-278	3.5169e-277	35.6995
ENSG00000298421	1.99725	8.06984e-278	6.01173e-277	35.6909
THRAP3	0.428962	4.26362e-278	3.18139e-277	35.6888
LTBP4	0.676572	7.63239e-278	5.68953e-277	35.6746
SPA17	2.1744	1.74732e-277	1.3e-276	35.6716
UBE2S	1.72547	2.00416e-277	1.49061e-276	35.6606
SS18	0.769032	1.70903e-277	1.27193e-276	35.6525
LINC01830	1.1216	3.60393e-277	2.67958e-276	35.6398
PPP1R17	1.12838	4.85428e-277	3.60575e-276	35.6259
CSMD2	0.295456	4.51586e-277	3.35654e-276	35.6219
POU3F2	0.519022	6.34787e-277	4.71366e-276	35.613
NIM1K	0.784123	8.22783e-277	6.10569e-276	35.6089
PRRC2C	0.309297	2.55634e-276	1.89578e-275	35.5727
ZNF444	0.776453	4.70488e-276	3.48801e-275	35.559
PPP1R12C	0.541584	7.95122e-276	5.89092e-275	35.5419
SMC3	0.455405	3.49921e-275	2.59084e-274	35.4994
RFC5	1.23032	1.15038e-274	8.51198e-274	35.4741
YBX3	1.73478	1.50324e-274	1.11158e-273	35.4735
GPX3	3.05288	1.06017e-273	7.82939e-273	35.4357
PPP1R9A-AS1	1.55675	7.08062e-274	5.23074e-273	35.4325
TLK2	0.446632	3.83924e-274	2.83712e-273	35.4315
TRAK1	0.419236	2.3608e-273	1.7429e-272	35.3796
UBE2D2	0.412366	2.64377e-273	1.95118e-272	35.3765
APPBP2-DT	2.79628	1.26246e-272	9.29646e-272	35.3626
SFI1	0.518392	7.42582e-273	5.4752e-272	35.348
ENSG00000259132	3.1388	2.99224e-272	2.20059e-271	35.3418
NAA16	0.452434	1.03104e-272	7.59719e-272	35.3381
CROCC2	3.56085	7.54377e-272	5.54439e-271	35.323
CAST-1	0.776021	2.71954e-272	2.00132e-271	35.3133
CARMIL1	0.4241	2.81825e-272	2.0733e-271	35.3088
TPTEP2-CSNK1E	0.371425	3.0926e-272	2.27367e-271	35.3062
GINS2	2.12733	2.30195e-271	1.69131e-270	35.2709
H2BC11	2.7839	5.34523e-271	3.92604e-270	35.2546
ZNF827	0.405046	6.81162e-271	5.0015e-270	35.2182
GSTM2	1.0095	1.32693e-270	9.73999e-270	35.205
IQCK	0.605801	1.36707e-270	1.00315e-269	35.2003
FZR1	0.546756	1.5554e-270	1.14098e-269	35.1958
ENSG00000249738	1.31857	3.46155e-270	2.53844e-269	35.1819
GRTP1	1.24953	5.83661e-270	4.27739e-269	35.1652
TPM4	0.585702	4.58929e-270	3.36435e-269	35.165
ENSG00000289644	2.28246	3.16381e-269	2.31714e-268	35.1321
MYO6	0.429754	2.1669e-269	1.58752e-268	35.1196
LAPTM4B	1.11176	3.40245e-269	2.49112e-268	35.1133
DENND5B	0.325376	4.0271e-269	2.94752e-268	35.1014
HRH1	1.47291	7.30874e-269	5.34773e-268	35.0959
ALG8	0.683132	4.08063e-268	2.98386e-267	35.0375
USP54	0.466915	1.03258e-267	7.54808e-267	35.0091
AHSA2P-1	0.778192	2.45678e-267	1.79418e-266	34.9868
TCIM	3.36412	8.41641e-267	6.14256e-266	34.9835
NHSL1-AS1	1.94064	5.37166e-267	3.92165e-266	34.9797
LINC01224	1.68442	2.24456e-266	1.63607e-265	34.9348
MAPK1	0.374939	8.27418e-266	6.02347e-265	34.8825
HDAC9	0.346404	3.11723e-265	2.26714e-264	34.8439
TCF19	2.53155	1.56322e-264	1.13512e-263	34.824
RPSAP52-1	1.6147	1.09045e-264	7.92323e-264	34.8211
SLC2A12	2.57286	2.25933e-264	1.64008e-263	34.8134
SPARC	1.37451	3.57322e-264	2.59059e-263	34.7827
DYNC1LI2	0.44813	5.46709e-264	3.95989e-263	34.7619
CREM	0.682359	5.80631e-264	4.20427e-263	34.7618
LUZP1	0.644471	1.05961e-263	7.67008e-263	34.7442
EFNB1	1.33205	1.8826e-263	1.36102e-262	34.7353
SASH1	0.547694	1.41605e-263	1.02438e-262	34.7346
MYEF2	0.429296	1.86315e-263	1.34738e-262	34.7264
ADCY2	0.430029	5.05829e-263	3.65574e-262	34.6971
CNKSR3	0.545492	6.52185e-263	4.71052e-262	34.6906
GAS1RR	2.10617	1.71916e-262	1.24092e-261	34.6822
TDP1	0.61994	1.10688e-262	7.99216e-262	34.6761
FCGRT	1.73882	1.91905e-262	1.38476e-261	34.6724
MAFTRR	2.43549	4.57339e-262	3.2939e-261	34.6579
IGF2R	0.468141	2.06281e-262	1.48803e-261	34.6569
C4orf19	1.541	3.52096e-262	2.5375e-261	34.6533
BMP1	1.02624	3.30962e-262	2.38593e-261	34.6481
CDO1	1.17475	4.3535e-262	3.13651e-261	34.6425
CCNY	0.315185	5.54117e-262	3.98968e-261	34.6275
FAM117A	1.13211	7.9279e-262	5.70278e-261	34.6246
TRIB2	0.931474	8.09002e-262	5.81758e-261	34.6217
RADX	1.62572	1.10537e-261	7.94384e-261	34.6209
ENSG00000227486	0.342751	7.54017e-262	5.42557e-261	34.6185
KPNB1-DT	0.603015	9.39304e-262	6.75248e-261	34.6141
DDIAS	1.8657	1.57857e-261	1.1341e-260	34.6139
ENSG00000269151	1.37653	2.84988e-261	2.04489e-260	34.5911
DGCR8	0.491603	2.55675e-261	1.83513e-260	34.584
KCTD9	1.20063	4.74665e-261	3.40483e-260	34.5724
GCFC2	0.590981	5.83842e-261	4.18666e-260	34.5608
SIN3A	0.546773	6.2871e-261	4.50699e-260	34.5581
MBOAT1	1.79111	1.2569e-260	8.99345e-260	34.5533
GLO1	0.971862	8.93879e-261	6.40191e-260	34.5521
ARHGAP12	0.566389	1.31128e-260	9.37961e-260	34.5369
AP1S2	0.850713	2.30425e-260	1.6467e-259	34.5231
SLC38A10	0.740089	4.3682e-260	3.11973e-259	34.5034
ENSG00000303992	2.1766	1.04597e-259	7.46328e-259	34.4973
CEP43	0.517156	6.33431e-260	4.52251e-259	34.4909
[truncated: 20,998 more rows]

## Sheet: OPC
gene	logfoldchange	pval	pval_adj	score
LHFPL3	4.36628	0	0	171.827
PCDH15	4.96358	0	0	169.643
PDGFRA	6.70405	0	0	147.503
SOX6	3.4565	0	0	136.143
SOX2-OT	3.55212	0	0	135.185
LINC00511	2.94313	0	0	129.243
CA10	3.83604	0	0	126.539
SEMA5A	3.82662	0	0	121.564
SH3D19	3.6477	0	0	119.369
MAML2	3.12133	0	0	118.288
DOCK10	3.84181	0	0	118.185
LRRC4C	2.84478	0	0	117.433
SGCD	3.25988	0	0	116.892
KCND2	2.76969	0	0	111.667
TNS3	3.95552	0	0	109.647
NXPH1	3.19413	0	0	108.453
IGSF9B	3.28172	0	0	106.439
COL20A1	6.84212	0	0	105.371
GRID2	2.40837	0	0	104.466
MDGA2	2.32089	0	0	104.339
TNR	2.4719	0	0	103.204
ZCCHC24	5.05594	0	0	102.705
EPN2	2.23366	0	0	102.578
GRIK4	2.94025	0	0	102.485
CSMD1	2.04157	0	0	101.396
OPCML	2.14602	0	0	101.202
NTN1	3.68488	0	0	100.673
TCF7L2	2.97054	0	0	94.6271
NPAS3	2.35224	0	0	94.0739
CDH20	3.23234	0	0	94.0523
DPP6	1.84768	0	0	93.8803
BRINP3	2.72843	0	0	93.6125
PDE4B	2.0736	0	0	93.5302
LINC03124	3.80197	0	0	93.0988
SGCZ	2.84111	0	0	92.961
SOX10	6.82357	0	0	92.0895
MMP16	2.02068	0	0	91.5827
LRP1B	2.08474	0	0	90.7688
CHD7	2.15623	0	0	89.9904
KANK1	3.30056	0	0	89.9256
QKI	1.97179	0	0	88.2933
MYT1	2.36737	0	0	87.7314
KIF13A	2.64094	0	0	87.5885
LUZP2	2.4559	0	0	87.2287
DISC1	3.10366	0	0	85.5396
LSAMP	1.55003	0	0	85.1356
XYLT1	1.83697	0	0	84.2477
CHST11	1.87187	0	0	83.7923
ENSG00000298352	3.05836	0	0	83.7874
GRID1	1.70699	0	0	83.7509
SCN1A	2.91368	0	0	81.5393
CHRM3	2.45087	0	0	81.479
EPB41L2	2.85985	0	0	81.4199
TAOK3	1.92155	0	0	80.6267
NCAM2	1.83191	0	0	79.0883
APBB2	1.96704	0	0	78.0319
BCAN	3.72057	0	0	77.8458
PDE7B	3.42545	0	0	77.8399
SMOC1	2.39653	0	0	77.6553
SULF2	2.6829	0	0	76.5603
ITPR2	2.37558	0	0	76.4308
ADGRB1	2.1496	0	0	76.0201
CADM2	1.40229	0	0	75.3299
SPATA6	2.9645	0	0	75.0863
PCDH9	1.69514	0	0	73.262
KAT2B	2.70382	0	0	72.9655
GRIA4	1.9495	0	0	72.5854
COL9A1	4.02138	0	0	72.3522
GPR17	8.12286	0	0	71.5753
GLCCI1	1.76989	0	0	71.0034
ZEB1	1.88172	0	0	70.9308
GALNT13	1.99797	0	0	70.6997
SLC2A13	1.96678	0	0	70.1165
PTPRZ1	1.47152	0	0	69.9586
KCND3	1.98602	0	0	69.7676
PEAK1	1.96809	0	0	69.5607
KCNIP1	1.90032	0	0	68.5374
ALCAM	2.06621	0	0	67.9523
DGKB	2.58907	0	0	67.926
TNK2	2.10484	0	0	67.8449
RNF144A	1.64841	0	0	67.7172
SHC3	1.72943	0	0	67.1652
PTPRE	1.99165	0	0	67.0791
KCNIP4	1.84328	0	0	66.8526
ADARB2	2.07878	0	0	66.5301
NTM	1.05705	0	0	66.5266
DOCK1	2.12775	0	0	66.4928
CSMD3	1.59541	0	0	66.414
ENSG00000271192	2.55879	0	0	66.3664
NOVA1	1.72386	0	0	66.3101
TMEM132D	2.18585	0	0	65.9996
TCF7L1	2.44506	0	0	65.7892
AFAP1L2	4.61559	0	0	65.735
SORCS3	1.7653	0	0	65.7193
ENSG00000288828	4.03658	0	0	65.6868
PPP2R2B	1.27557	0	0	65.2244
LINC01170	3.67278	0	0	64.7213
ATP10B	4.26293	0	0	63.9884
MAP3K1	2.94232	0	0	63.7494
SNTG1	1.50145	0	0	63.4744
AGAP1	1.07873	0	0	63.4554
SIRT2	2.40693	0	0	63.4272
ADGRL3	1.19121	0	0	63.229
PID1	1.58549	0	0	62.9426
ENSG00000287158	5.51672	0	0	62.8031
ENSG00000297062	4.01423	0	0	62.6666
ARHGAP42	2.85637	0	0	62.5642
LMCD1-AS1	2.50077	0	0	62.5469
LRRTM3	1.9745	0	0	62.4069
TNS1	2.59547	0	0	62.147
PTPRT	1.80655	0	0	62.1243
MMD2	2.4405	0	0	62.076
REV3L	1.46739	0	0	62.0112
CNTN1	1.51618	0	0	61.4722
RAPGEF4	1.94453	0	0	60.8848
PCDH7	1.66238	0	0	60.6628
KCNMB2	1.91574	0	0	60.6168
DGKG	2.86411	0	0	60.2957
ENSG00000297100	4.24042	0	0	60.1824
COL11A1	1.86615	0	0	59.9916
SLC9A9	2.64596	0	0	59.9018
GHR	2.86754	0	0	59.5728
RFTN2	2.33552	0	0	59.5099
NTNG1	2.09447	0	0	59.4852
BCAS1	6.44253	0	0	59.3396
RORA	1.48282	0	0	58.4401
IL1RAPL1	1.40147	0	0	58.3643
SAMD4A	2.03816	0	0	58.3131
GPC6	1.38274	0	0	57.9554
NOVA1-DT	2.94922	0	0	57.9513
ATP13A4	2.94121	0	0	57.3543
MIR9-1HG	1.21395	0	0	57.3221
MBP	3.75309	0	0	56.9586
CNTNAP5	1.60031	0	0	56.5512
CASK	1.19932	0	0	56.2375
FGF14	1.36137	0	0	55.8082
RAB31	2.71705	0	0	55.7335
NMT1	1.90047	0	0	55.701
MEGF11	1.93992	0	0	55.1875
CSPG4	4.94224	0	0	54.8815
PHLPP1	1.40176	0	0	54.614
PTPRG	1.28295	0	0	54.3246
ZNF469	4.64399	0	0	53.9306
PCDH11X	1.30722	0	0	53.7473
DST	0.909077	0	0	53.5423
LINC02930	2.72414	0	0	53.5166
SLC35F1	1.24509	0	0	53.5123
NETO1	2.40544	0	0	53.2993
SCD5	1.23372	0	0	53.0864
TMEM163	1.38662	0	0	53.0585
MAGI1	1.24313	0	0	53.0488
P2RX7	3.70591	0	0	52.928
HIP1	1.38411	0	0	52.6867
LRRK2	3.39839	0	0	52.5072
PHLDB1	1.70859	0	0	51.9434
BRINP1	1.65381	0	0	51.8742
PLPP4	2.72438	0	0	51.7026
ERBB3	5.82978	0	0	51.6999
SHROOM4	2.82907	0	0	51.4948
SCFD2	1.34038	0	0	51.4018
ILDR2	2.36084	0	0	51.2044
NLGN4X	1.25898	0	0	50.3894
EYA1	2.89327	0	0	50.3765
SOX13	3.68541	0	0	49.9505
SLC1A1	1.53522	0	0	49.3924
CTXND1	4.35395	0	0	49.3355
PARD3B	1.60865	0	0	49.2668
CDH13	1.36653	0	0	48.9702
ENSG00000278041	6.25538	0	0	48.9185
HIPK2	1.23048	0	0	48.7509
ARHGAP31	2.46904	0	0	48.7441
CACNB2	1.34774	0	0	48.713
UGT8	4.57627	0	0	48.5579
POLR2F	1.63273	0	0	48.5499
ARHGAP35	1.09072	0	0	48.5061
LAMA4	2.71323	0	0	48.3485
C11orf58	1.73778	0	0	48.2098
KIZ	1.87083	0	0	48.121
C1orf21	1.20723	0	0	48.0033
ENSG00000289128	1.11333	0	0	47.7604
LRRTM4	1.0975	0	0	47.7029
NBEAP2	3.56827	0	0	47.523
SPRY4	4.03657	0	0	47.2571
LINC01322	1.63628	0	0	47.1963
SYT17	2.27489	0	0	47.0507
PROM1	1.93124	0	0	46.8885
ENSG00000251034	3.64882	0	0	46.6597
RIT2	1.88224	0	0	46.575
SYNE1	1.04714	0	0	46.5531
PRKCA	1.06218	0	0	46.4945
TMOD1	1.60006	0	0	46.3711
GNG7	1.69899	0	0	46.3649
BCHE	3.52885	0	0	46.3002
PLAAT1	2.45986	0	0	46.1259
KCNQ1OT1	1.05531	0	0	46.0102
KCNIP3	2.10424	0	0	45.7646
PLEKHH2	2.27184	0	0	45.7362
SLC44A1	1.304	0	0	45.7299
RAMP1	3.60552	0	0	45.6939
SALL3	2.57877	0	0	45.2463
ZEB1-AS1	2.3499	0	0	45.1704
WSCD1	2.01825	0	0	44.9275
DPF3	1.60854	0	0	44.8286
STK32A	2.5783	0	0	44.7142
DNM3	0.934957	0	0	44.6522
CSGALNACT1	1.38631	0	0	44.4681
LIMA1	1.65537	0	0	44.4218
MYH14	2.75942	0	0	44.3491
ZNF521	1.76327	0	0	44.1992
PLPPR1	0.937393	0	0	44.1686
LMF1	1.30149	0	0	43.9756
WIPF1	2.61197	0	0	43.9724
UBE2E2	1.15496	0	0	43.6643
SH3RF1	1.63367	0	0	43.6428
PTN	1.32736	0	0	43.6209
EYA2	2.67464	0	0	43.5513
SLC24A3	1.31162	0	0	43.2494
FYN	0.929432	0	0	43.202
LDLRAD3	1.14981	0	0	43.0839
ADAMTS3	2.05813	0	0	43.0265
UST	1.4788	0	0	42.6589
PBX3	1.46912	0	0	42.5575
ELFN2	1.26311	0	0	42.491
MYRF	4.80193	0	0	42.4844
FA2H	5.18018	0	0	42.477
FARP2	1.439	0	0	42.4285
SETD5	0.991405	0	0	42.2902
MTSS2	1.57213	0	0	42.1687
PPP1R16B	1.84027	0	0	42.1104
ASIC4	4.66326	0	0	42.0544
FCHSD2	0.908451	0	0	41.95
MAMLD1	1.38744	0	0	41.924
TRIO	0.624108	0	0	41.8919
CAMSAP2	0.974518	0	0	41.7812
BMPER	2.38935	0	0	41.7498
COBL	2.23529	0	0	41.5387
ENOSF1	2.45289	0	0	41.3985
LINC03122	3.5275	0	0	41.2126
TENM1	1.10789	0	0	41.1329
ENSG00000230615	4.37863	0	0	40.89
APCDD1	2.78165	0	0	40.7352
ENSG00000231424	2.41648	0	0	40.6036
ASIC4-AS1	5.86688	0	0	40.5662
SOX2	1.60065	0	0	40.4131
ARHGEF3	1.41349	0	0	40.3849
ZNF827	1.12213	0	0	40.1416
SASH1	1.44371	0	0	40.087
NALCN	1.59747	0	0	40.0317
ENSG00000286263	4.16162	0	0	39.9208
NCALD	0.993173	0	0	39.8123
DCC	0.883419	0	0	39.793
ANO3	2.32505	0	0	39.4486
TJP1	1.17093	0	0	39.3707
PIK3R1	1.76827	0	0	39.228
SEZ6L	0.976521	0	0	39.2109
LPP	1.06324	0	0	38.9999
MAP4K5	0.982602	0	0	38.9936
GPC5	1.52146	0	0	38.9934
ZHX2	1.11859	0	0	38.9688
PDLIM5	2.05156	0	0	38.952
ENSG00000231401	2.37292	0	0	38.9377
ENSG00000253730	4.82398	0	0	38.829
GRIK1	1.56213	0	0	38.7955
NLGN4Y	1.21592	0	0	38.5083
ENSG00000285837	2.31856	0	2.60441e-307	38.2841
KCNS3	3.04698	1.40226e-307	1.07135e-305	38.2681
NLGN1	0.736617	0	9.14017e-307	38.0905
ARNT2	0.975949	0	4.97182e-307	38.0592
MARCHF1	0.903565	8.37049e-308	6.41654e-306	37.9942
DPP10	0.921016	1.64746e-305	1.25453e-303	37.8988
LINC02895	4.10867	1.20035e-299	8.96249e-298	37.8337
CSMD2	0.752121	7.95284e-304	6.03602e-302	37.7877
PRRX1	3.86161	5.81195e-298	4.32548e-296	37.6965
LRP1	0.891526	1.7982e-301	1.3603e-299	37.5827
DDAH1	1.39081	1.42865e-300	1.0772e-298	37.5532
IGSF11	1.51168	6.49215e-300	4.86319e-298	37.543
SGK1	1.16698	3.15999e-300	2.37485e-298	37.5186
CA8	2.05434	6.94881e-297	5.15489e-295	37.4094
CSPG5	2.09506	1.41127e-296	1.04357e-294	37.4047
NKX2-2	6.45012	5.1737e-291	3.7533e-289	37.3351
ENSG00000288605	1.90981	1.54833e-293	1.1376e-291	37.1748
KCTD8	1.7857	1.76914e-293	1.2957e-291	37.1422
AMZ1	2.03614	4.30421e-292	3.14234e-290	37.0951
NKAIN4	2.626	5.32412e-290	3.85028e-288	37.0266
TSHZ2	1.57107	2.85315e-291	2.07639e-289	36.9534
SCUBE2	2.11329	2.61139e-289	1.88257e-287	36.9273
NKD1	2.16351	1.46477e-284	1.04289e-282	36.6022
GRIA2	0.721097	1.70073e-285	1.21843e-283	36.5531
WWOX	0.900275	2.14506e-285	1.53198e-283	36.5363
SUSD4	1.4599	3.16857e-282	2.24208e-280	36.3608
SIK3	0.884237	1.56056e-282	1.10766e-280	36.3452
PALLD	1.18281	5.8737e-282	4.14348e-280	36.3164
ENPP6	5.39473	7.94211e-276	5.50135e-274	36.2834
CABLES1	1.8969	1.30891e-279	9.14924e-278	36.2523
FIP1L1	1.18224	1.26713e-280	8.91139e-279	36.2376
NRXN3	1.05348	5.46371e-280	3.83076e-278	36.1967
CREB3L2	2.15636	1.9387e-277	1.34696e-275	36.1271
EIF4G3	0.684752	3.24013e-278	2.25798e-276	36.0642
CDK14	0.862133	2.50834e-275	1.73226e-273	35.8663
SH3BP4	1.61003	4.45816e-273	3.06959e-271	35.7692
NTRK3	0.709121	7.26255e-271	4.98558e-269	35.5856
ERBB4	1.09946	4.03503e-270	2.76171e-268	35.5229
GAB1	1.30411	1.38623e-269	9.43167e-268	35.4938
KLF12	0.854409	1.04244e-269	7.11365e-268	35.486
SLC6A1	1.17907	3.89289e-269	2.64085e-267	35.4499
SPSB1	2.40712	3.55861e-266	2.3929e-264	35.3985
LINC02283	5.60486	2.44334e-262	1.61929e-260	35.3385
MPZL1	1.1193	1.07483e-266	7.26993e-265	35.2958
CDH10	1.12107	1.21537e-266	8.19642e-265	35.2821
SLITRK2	2.40479	2.71249e-264	1.81335e-262	35.2653
NID2	3.15194	9.34577e-262	6.17599e-260	35.1625
SEMA6D	0.701008	1.04013e-264	6.97373e-263	35.1611
PLXNB3	5.11317	1.18785e-259	7.73854e-258	35.1316
PARD3	1.04591	1.08612e-263	7.23988e-262	35.0749
LRRN1	1.2206	3.66156e-263	2.43367e-261	35.0572
PMP2	4.53379	8.39609e-259	5.43901e-257	35.0438
LINC03048	3.38131	2.7321e-259	1.77486e-257	35.0179
GRIK3	0.935706	1.8616e-261	1.22669e-259	34.9424
SHISA9	0.867008	1.88869e-261	1.24098e-259	34.927
MEG8	1.09014	2.64086e-261	1.73025e-259	34.9133
PKP4	1.08192	8.16427e-261	5.33391e-259	34.9004
SNX22	3.4549	6.24137e-255	4.02053e-253	34.7167
ANGPTL2	3.10674	2.44182e-252	1.56419e-250	34.5038
CRB1	1.35092	4.29543e-253	2.75927e-251	34.3844
ENSG00000226994	3.77259	1.39411e-249	8.88096e-248	34.3597
NIM1K	1.71061	6.72404e-252	4.29535e-250	34.3243
MIR503HG	5.14653	2.84492e-246	1.79246e-244	34.1646
UNC80	1.1405	1.26795e-246	8.03278e-245	33.8997
ARHGEF4	1.53527	9.34392e-246	5.8711e-244	33.8721
CALCRL	3.62603	2.81139e-239	1.73334e-237	33.5909
CDK18	3.16837	2.44369e-239	1.51069e-237	33.5876
USP24	0.846622	3.59995e-241	2.25581e-239	33.5004
NCKAP5	0.753832	7.86588e-241	4.91554e-239	33.483
ACAP3	0.940676	9.95038e-241	6.20132e-239	33.4688
CACNG4	0.876282	2.86903e-240	1.78322e-238	33.4345
ENSG00000286446	1.13882	4.60179e-240	2.85249e-238	33.4308
B3GALT5	1.95951	7.16258e-239	4.39247e-237	33.4175
ENSG00000239922	3.61697	1.15972e-236	7.07429e-235	33.3996
DCLK2	0.793478	6.64532e-239	4.08616e-237	33.3375
RIMS2	0.842906	1.55263e-238	9.49625e-237	33.3127
SLC22A3	3.15272	9.71818e-234	5.91241e-232	33.1521
PLAT	3.66083	9.26306e-233	5.60586e-231	33.1106
BLM	2.19275	9.04606e-233	5.48898e-231	32.9903
ARHGAP10	2.53162	2.75655e-232	1.65949e-230	32.9831
LRP5	1.18128	1.45756e-232	8.79776e-231	32.8913
TMEM132C	1.84036	1.35393e-231	8.08736e-230	32.8634
VSTM2B	1.28484	7.04012e-232	4.21619e-230	32.8473
PDZD2	0.916619	4.06862e-232	2.44298e-230	32.8458
DOCK6	2.84622	1.932e-229	1.13923e-227	32.8151
PCDH11Y	1.18507	1.52701e-230	9.07404e-229	32.7469
GRIK2	0.809205	2.6223e-230	1.55426e-228	32.7236
ENSG00000299691	4.87346	1.3559e-226	7.83456e-225	32.7089
CNTNAP2	0.807101	9.52624e-230	5.63174e-228	32.6882
EPB41L4B	1.64609	4.4558e-229	2.61403e-227	32.6764
ZNF516	1.04045	2.54238e-229	1.49532e-227	32.6485
ZFYVE16	0.944693	1.56581e-228	9.16255e-227	32.5873
RANBP17	0.924942	3.44176e-228	2.0038e-226	32.56
LINC01945	2.05147	2.6049e-226	1.50137e-224	32.512
PLCB1	0.690966	3.54121e-227	2.05132e-225	32.4937
CREB5	1.18691	2.87286e-226	1.65168e-224	32.4206
CHST3	2.1738	5.15089e-225	2.94664e-223	32.4152
RTKN	3.45178	1.00116e-222	5.67087e-221	32.3492
ADGRA1	1.97364	3.27378e-223	1.86354e-221	32.2715
DNER	0.869987	6.46575e-224	3.68965e-222	32.2439
CNTN3	0.94501	2.30567e-222	1.30279e-220	32.1293
ZNF462	0.70639	1.31911e-221	7.43519e-220	32.074
ENSG00000264015	3.28193	4.28914e-219	2.39411e-217	32.0718
USP54	1.05551	2.37668e-221	1.33634e-219	32.0642
SHISA6	1.12041	6.12046e-219	3.40804e-217	31.8773
LINC02488	1.24859	6.61195e-218	3.67283e-216	31.8155
BMP7	1.59511	2.14018e-217	1.18597e-215	31.7879
PTCH1	1.26244	3.1534e-217	1.74324e-215	31.7632
LINC00609	1.86555	1.99383e-216	1.09957e-214	31.75
CEROX1	2.38385	6.26716e-214	3.4153e-212	31.6057
MSI2	0.728573	9.95157e-215	5.46196e-213	31.5719
GPSM2	1.52324	9.33078e-214	5.07281e-212	31.5201
ATP2B4	1.04785	2.94578e-211	1.59398e-209	31.2989
ST3GAL5	1.64302	8.85643e-209	4.78102e-207	31.1536
ENSG00000264449	1.1	9.25805e-209	4.98612e-207	31.1125
XKR6	0.724337	1.59399e-208	8.56471e-207	31.0868
TTYH1	1.3549	3.38616e-208	1.81096e-206	31.077
NR3C2	1.45413	1.71203e-207	9.1138e-206	31.0303
SPRED1	1.03831	2.10011e-207	1.11538e-205	31.0076
UNC13C	1.0353	9.54427e-207	5.05736e-205	30.952
PCDH17	1.28213	5.53229e-203	2.91135e-201	30.6764
ENSG00000259048	3.39374	1.20231e-199	6.24143e-198	30.5682
LINC01301	1.57108	3.85158e-201	2.0085e-199	30.5596
KDM4C	0.923599	1.27255e-201	6.68147e-200	30.5561
LINC01237	0.926893	3.18496e-201	1.66844e-199	30.5257
NLGN2	1.0705	3.62753e-201	1.89596e-199	30.5247
MIR3681HG	2.49938	5.39893e-199	2.7901e-197	30.4593
CTNNA3	1.29789	3.36679e-199	1.74383e-197	30.3846
VASH1-DT	1.56103	2.71789e-198	1.40142e-196	30.333
NR2F2-AS1	1.43242	2.18683e-197	1.12507e-195	30.2417
ADGRB3	0.490992	3.57156e-197	1.83337e-195	30.2148
ADAMTS17	1.48637	2.37006e-196	1.2139e-194	30.1706
VSTM2B-DT	1.05312	1.21403e-195	6.19049e-194	30.0864
FREM2	2.56277	5.07949e-193	2.57866e-191	29.9786
IQSEC1	0.849115	2.71856e-192	1.37707e-190	29.8172
KLHL13	1.54076	1.30374e-191	6.58949e-190	29.7982
LRP6	0.790868	2.37118e-191	1.19061e-189	29.7428
NR3C1	1.74029	2.61966e-190	1.31251e-188	29.7064
VEGFA	1.48615	6.7607e-190	3.37991e-188	29.6568
GRAMD2B	2.57794	9.95021e-189	4.93157e-187	29.6292
NOTCH1	1.27038	8.31822e-190	4.14955e-188	29.6287
SRRM2	0.650881	2.4973e-189	1.24308e-187	29.5826
MITF	2.21405	4.51025e-188	2.2258e-186	29.5578
NRG2	0.999299	6.22427e-189	3.09157e-187	29.5533
ATCAY	0.83863	1.4922e-188	7.3798e-187	29.5193
FGFR1	1.09289	4.77898e-188	2.35337e-186	29.4837
C1QL1	3.7348	9.0163e-186	4.40229e-184	29.4532
DSCAML1	0.687407	2.04341e-186	9.99838e-185	29.3539
LINC01776	1.39108	1.21825e-185	5.93562e-184	29.3105
CCND1	3.96177	1.29027e-182	6.24683e-181	29.2029
ELF1	1.75765	3.52651e-183	1.71095e-181	29.1322
TFEB	2.70344	4.04232e-182	1.95297e-180	29.1061
FMNL3	1.17455	2.05468e-181	9.90598e-180	28.9504
GALNT10	1.07928	8.52949e-181	4.10361e-179	28.8974
FBXL7	0.833205	1.21702e-179	5.84299e-178	28.7948
DENND5A	0.798908	9.53451e-179	4.56803e-177	28.7202
SPECC1	0.918301	1.29679e-178	6.1872e-177	28.7097
ZNF365	2.13874	2.19805e-177	1.04439e-175	28.6881
PARAIL	1.08635	3.34225e-178	1.59134e-176	28.6824
TMEM132E	2.43064	3.42759e-176	1.6219e-174	28.5947
HAS2	3.44169	1.78999e-175	8.43535e-174	28.5814
ACAN	5.22107	1.81166e-174	8.45087e-173	28.5507
GRIN2A	1.13293	2.43945e-175	1.14724e-173	28.4489
NAALADL2	0.810685	4.81272e-175	2.25414e-173	28.4127
PCMTD2	1.11525	7.12154e-175	3.32874e-173	28.411
COL9A3	2.18083	3.45702e-172	1.60284e-170	28.2396
CUEDC1	1.03278	6.97251e-173	3.23933e-171	28.2389
SCRG1	4.19291	7.87507e-171	3.62932e-169	28.2172
ENSG00000297419	1.38188	4.61049e-172	2.12907e-170	28.1906
TF	2.11535	8.39143e-171	3.85955e-169	28.1306
TRIB2	1.73051	2.00306e-170	9.19446e-169	28.0698
NEK7	1.41788	1.05105e-169	4.81493e-168	27.9866
ENSG00000231533	2.52613	2.48307e-168	1.133e-166	27.9381
DIRC3	1.59476	1.67514e-168	7.6587e-167	27.8952
ENSG00000261786	2.88255	3.23908e-167	1.46921e-165	27.8641
MIR9-3HG	0.723352	1.07161e-167	4.87995e-166	27.7941
KCNH8	0.768689	1.65762e-165	7.44539e-164	27.6074
MCF2L2	0.995952	1.97068e-165	8.83426e-164	27.6062
UGDH	1.58319	5.47872e-164	2.44649e-162	27.5117
EYS	1.46787	7.48412e-164	3.33551e-162	27.5004
ATOH8	2.89394	5.93887e-162	2.6164e-160	27.3988
KAZN	0.569665	1.4848e-162	6.57917e-161	27.3841
FIGN	1.17853	1.02152e-162	4.53513e-161	27.3751
LGR4	1.50752	2.49886e-162	1.103e-160	27.3627
ATG2B	0.992477	1.53032e-162	6.76786e-161	27.3591
BAALC	1.24937	7.03549e-162	3.0936e-160	27.3143
ITGB8	0.959186	7.63084e-162	3.34898e-160	27.2959
INKA2	2.32351	4.42252e-161	1.92258e-159	27.2957
ENSG00000253553	0.957015	9.85752e-162	4.31797e-160	27.2861
PRTG	2.04991	3.38868e-161	1.48155e-159	27.286
RAB3IP	1.29952	7.20194e-161	3.11908e-159	27.2272
SERINC5	0.829731	8.72467e-161	3.77145e-159	27.2023
STXBP5L	0.73989	2.02221e-160	8.72509e-159	27.1686
RAD51B	0.923107	2.30443e-160	9.92415e-159	27.1651
KCNT2	0.75398	6.43281e-160	2.76515e-158	27.1251
PXDC1	2.14558	3.95403e-159	1.69331e-157	27.1151
CLDN11	4.13524	8.93318e-158	3.81143e-156	27.0795
TMEFF2	0.902509	4.84059e-159	2.06913e-157	27.0506
ENSG00000225649	2.91507	3.14461e-157	1.33672e-155	26.9879
TMEM45A	2.85624	4.85312e-157	2.05538e-155	26.9665
ATP9B	0.687105	3.58799e-157	1.52238e-155	26.8848
SDC3	0.950587	9.08433e-157	3.8403e-155	26.8545
ENSG00000285218	2.8675	5.39585e-155	2.26853e-153	26.7936
NRXN1-DT	1.51195	6.12225e-155	2.56454e-153	26.7224
GALR1	2.96477	8.24327e-154	3.42185e-152	26.6832
BMP8B	5.31544	3.80216e-153	1.57263e-151	26.6809
B3GAT2	1.37285	1.33978e-154	5.59181e-153	26.6764
STK10	1.10594	5.58051e-154	2.32071e-152	26.6123
PDZRN4	1.15865	8.85777e-154	3.67031e-152	26.5951
ENSG00000253361	4.8553	4.82694e-151	1.97761e-149	26.4854
ENSG00000296080	3.47752	1.50602e-150	6.11909e-149	26.4111
ST3GAL6	0.986984	9.44169e-152	3.89123e-150	26.4109
PREX1	0.806453	2.40319e-151	9.86894e-150	26.3687
EVI5L	0.913411	7.18544e-151	2.93505e-149	26.3296
MTAP	0.974696	8.30588e-151	3.38072e-149	26.3245
ENSG00000297941	1.14969	1.94182e-150	7.86196e-149	26.3026
PVT1	1.10758	1.75548e-150	7.12008e-149	26.3023
GLRA3	1.9469	1.45982e-149	5.90007e-148	26.2734
ENSG00000308323	3.27058	1.15492e-147	4.61908e-146	26.1381
SON	0.70392	1.23331e-148	4.97587e-147	26.1254
ABHD2	0.877893	1.39463e-148	5.61688e-147	26.1243
ENSG00000289095	1.9925	5.65624e-148	2.27407e-146	26.1141
MED12L	0.891234	5.7122e-148	2.29256e-146	26.0661
MIR325HG	0.886589	9.12293e-148	3.65505e-146	26.0485
PCDHGA2	0.638699	1.40782e-146	5.61104e-145	25.9392
LRFN5	0.718513	7.16594e-146	2.84129e-144	25.8749
KCNJ10	2.13342	2.78397e-145	1.09628e-143	25.8692
ENSG00000229727	1.62296	2.17751e-145	8.58938e-144	25.861
PHYHIPL	0.836146	1.60583e-145	6.35616e-144	25.8448
GAL3ST1	3.48967	6.69145e-144	2.62599e-142	25.7992
SEMA3D	2.96699	1.68879e-142	6.57143e-141	25.653
SERPINE2	1.3378	5.7049e-143	2.23502e-141	25.6285
LGR5	2.94079	3.07435e-142	1.19427e-140	25.6217
RPS6KA2	0.659299	5.7782e-143	2.25989e-141	25.6091
RIN2	0.83071	8.05382e-143	3.14454e-141	25.5975
KCNMB2-AS1	1.63936	5.65378e-142	2.18889e-140	25.548
TMEM117	0.984728	3.76717e-142	1.46094e-140	25.5393
ENSG00000247134	1.76907	1.79313e-141	6.91889e-140	25.5062
STK33	1.2472	2.52308e-141	9.71914e-140	25.4679
E2F3	1.05659	3.35388e-141	1.28763e-139	25.4536
ENSG00000262801	0.793442	2.96157e-141	1.13892e-139	25.4522
SOX8	3.49771	9.15e-140	3.50121e-138	25.4114
CDC14A	1.46591	1.451e-139	5.54297e-138	25.3135
ENSG00000303938	0.80372	1.51993e-139	5.79666e-138	25.2934
MOB3B	0.950612	5.74201e-139	2.18624e-137	25.243
MACORIS	4.34878	1.62463e-137	6.12486e-136	25.2185
KIAA1958	0.773683	1.5066e-138	5.72681e-137	25.2005
LINC00937	1.23203	2.55344e-138	9.69001e-137	25.1924
PTCHD1-AS	1.06733	2.74464e-138	1.03984e-136	25.1826
ESRRG	0.878653	7.03055e-138	2.65487e-136	25.1401
RNF125	2.39185	4.45364e-137	1.67354e-135	25.1217
VXN	2.93243	5.91938e-136	2.21346e-134	25.0345
IL1RAP	1.78453	1.07672e-135	4.01318e-134	24.9735
ZNF276	1.12715	9.15435e-136	3.41757e-134	24.9482
TLE2	1.43867	1.36409e-135	5.06786e-134	24.9417
SYNDIG1	0.718752	1.16595e-135	4.33871e-134	24.929
KCNN2	0.958689	2.12382e-135	7.87765e-134	24.9093
BRINP2	1.05018	2.31349e-135	8.55361e-134	24.9053
ETV5	1.30878	4.29831e-135	1.58665e-133	24.8904
STK32B	0.759756	6.20185e-135	2.28564e-133	24.8606
PLD5	1.15943	8.37314e-135	3.07599e-133	24.8556
DENND2B	1.07638	6.61764e-134	2.42721e-132	24.7689
LRCH3	0.703986	6.98144e-133	2.55656e-131	24.6661
ENSG00000305478	2.08497	3.52089e-132	1.28728e-130	24.6405
PLOD2	1.79184	3.22792e-131	1.1783e-129	24.5379
FAM89A	3.14211	1.57107e-130	5.70773e-129	24.5208
LHFPL2	1.10071	5.14939e-131	1.87671e-129	24.4942
ZNF385D	0.762448	8.63336e-131	3.14148e-129	24.4657
AATK	0.953165	4.22217e-130	1.5315e-128	24.4043
C2orf72	1.56262	1.30477e-129	4.72531e-128	24.3755
PLLP	4.23502	1.18259e-128	4.26939e-127	24.3634
TNS2	1.17319	1.70973e-128	6.15314e-127	24.256
ENSG00000241231	2.33205	1.40814e-127	5.04409e-126	24.2046
INAVA	3.9602	6.91418e-127	2.45758e-125	24.1833
PLD1	2.10676	3.53139e-127	1.25714e-125	24.1644
CDCA7L	1.69988	1.58566e-126	5.6187e-125	24.0785
TCF12	0.524408	1.14648e-126	4.06878e-125	24.0678
ENSG00000284686	1.38188	5.07243e-126	1.79462e-124	24.0173
PRKD1	0.722028	1.97609e-125	6.98067e-124	23.9458
TSHZ1	1.30431	2.86471e-125	1.01043e-123	23.9423
EML5	0.893605	4.41791e-125	1.55588e-123	23.9149
HMX1	4.31706	7.93611e-124	2.77366e-122	23.8853
PTPRJ	0.657986	1.17446e-124	4.12984e-123	23.8698
PPP1R9A	0.558034	1.79713e-124	6.30972e-123	23.852
TIAM1	0.658617	1.32108e-123	4.61016e-122	23.7663
ENSG00000285835	2.99357	9.38576e-123	3.25067e-121	23.7523
NLGN3	1.1453	3.43753e-123	1.19596e-121	23.7342
STRIP2	2.16074	1.33393e-122	4.61298e-121	23.7089
RAP1GAP	0.989959	2.31337e-122	7.98808e-121	23.6485
NETO1-DT	2.46021	9.3586e-122	3.21704e-120	23.6351
RICTOR	0.675013	8.54117e-122	2.94044e-120	23.5875
FGF12	0.566635	1.87133e-121	6.41355e-120	23.5553
ABTB2	0.928384	3.95208e-121	1.35247e-119	23.5219
C12orf76	1.62296	3.38644e-120	1.15546e-118	23.4527
ENSG00000287720	1.11879	2.36588e-120	8.08441e-119	23.4516
TANC1	1.16808	7.21282e-120	2.45012e-118	23.4035
VWC2	1.31802	7.91344e-120	2.68415e-118	23.403
BBX	0.830954	6.80283e-120	2.31427e-118	23.3984
CENPJ	0.856104	9.60353e-120	3.25261e-118	23.3866
FLRT1	0.84886	1.96591e-119	6.64855e-118	23.3529
DCBLD2	0.773984	2.58396e-119	8.7259e-118	23.34
GFRA1	1.41938	1.74807e-118	5.86011e-117	23.2692
GNG12	1.41916	1.90812e-118	6.38733e-117	23.2662
MIR181A2HG	1.16084	2.38011e-118	7.95573e-117	23.2515
KLHL5	0.834498	2.87288e-118	9.58893e-117	23.2351
DLEU1	1.21425	6.07083e-117	2.01459e-115	23.1081
GRM8	1.08522	2.63833e-116	8.74261e-115	23.0401
FERMT1	3.64483	1.55346e-115	5.13291e-114	23.0372
STK32A-AS1	3.76735	8.9699e-115	2.95109e-113	22.9587
TSPOAP1	0.763437	2.22699e-115	7.34778e-114	22.9419
RIMS1	0.549394	2.53481e-115	8.35142e-114	22.9356
FOXN2	1.01325	1.08192e-114	3.55442e-113	22.8758
CHIC2	0.908409	2.78177e-113	9.08698e-112	22.7294
IFNAR2	0.924318	3.07299e-113	1.0024e-111	22.7244
TRERF1	0.675189	1.63137e-112	5.30645e-111	22.6464
MCAM	2.32681	5.93538e-112	1.92248e-110	22.6286
KHDRBS3	0.619881	3.39106e-112	1.09992e-110	22.6138
ZMAT3	1.71253	2.79332e-111	9.00954e-110	22.5421
ITGAV	0.969997	2.20299e-111	7.11548e-110	22.533
LINC01748	0.85464	1.25539e-110	4.0378e-109	22.4515
PIP4K2A	0.818375	1.85059e-110	5.94387e-109	22.4354
TRIM24	0.605634	2.77459e-110	8.89919e-109	22.4146
LINC02743	1.91434	1.07518e-109	3.43416e-108	22.3839
ATE1	0.691638	5.625e-110	1.80164e-108	22.3831
ENSG00000231252	0.75739	6.94896e-110	2.2226e-108	22.373
ZNF577	0.88364	5.33307e-109	1.69633e-107	22.2834
GRM5	0.580926	9.06439e-109	2.87126e-107	22.2571
ZDHHC14	0.668997	1.24669e-108	3.93821e-107	22.2416
MYRIP	0.757337	2.02365e-108	6.38378e-107	22.2199
COMMD10	0.712221	8.4742e-108	2.66231e-106	22.154
SREK1	0.637652	2.29241e-107	7.19216e-106	22.108
NDE1	1.36364	4.49147e-106	1.40531e-104	21.9814
CMTM8	1.77202	9.44803e-106	2.94812e-104	21.9606
ZMYND8	0.522178	1.4164e-105	4.41367e-104	21.9179
ADAM12	1.53705	3.40823e-105	1.05918e-103	21.8905
ZKSCAN1	0.673263	3.13357e-105	9.75138e-104	21.8813
PADI2	2.93005	5.28492e-104	1.62919e-102	21.8039
EFS	1.08748	3.05805e-104	9.46514e-103	21.7804
ASTN1	0.459477	3.11326e-104	9.62308e-103	21.7752
CCDC26	2.06774	7.57161e-104	2.33098e-102	21.7714
AGMO	3.16735	3.5871e-103	1.10137e-101	21.7203
NAV2	0.465775	1.37359e-103	4.22306e-102	21.705
RFX4	1.08258	4.20695e-103	1.28996e-101	21.656
ATP13A5	3.0183	1.1958e-102	3.65688e-101	21.6555
ARID5B	0.96761	9.95466e-103	3.0483e-101	21.6161
ANKRD20A1	2.03958	3.03945e-102	9.27033e-101	21.5896
ENSG00000230960	4.64866	3.51427e-101	1.06199e-99	21.5199
FANCI	1.11252	8.16885e-102	2.48491e-100	21.5188
IGF2BP3	0.538155	8.74826e-102	2.65765e-100	21.5098
PCGF3-AS1	0.634124	1.25454e-101	3.80615e-100	21.4928
CDKL1	0.740552	4.42015e-101	1.33224e-99	21.4342
PRKCQ	2.03092	1.36265e-100	4.09632e-99	21.4069
KCNA2	2.02985	2.13773e-100	6.40957e-99	21.3875
MYBL1	1.84433	3.27423e-100	9.80436e-99	21.3606
EHD4	2.4959	5.179e-100	1.54677e-98	21.3561
CRADD	0.721745	4.83389e-100	1.44558e-98	21.3201
RAB27B	1.27859	8.21835e-100	2.45133e-98	21.3053
MIR4307HG	2.00861	2.05228e-99	6.0977e-98	21.2799
ENSG00000309593	2.14199	4.28514e-99	1.26992e-97	21.2445
TRPS1	0.843385	3.17999e-99	9.43616e-98	21.231
ADORA1	1.16918	6.23909e-99	1.8466e-97	21.205
NEDD4	1.25178	2.25595e-98	6.65983e-97	21.1439
SILC1	0.889017	2.37049e-98	6.989e-97	21.1385
GDNF-AS1	2.33269	1.70014e-97	4.97432e-96	21.075
DIAPH2	0.74898	1.00766e-97	2.96331e-96	21.0651
IFFO2	1.81611	1.70468e-97	4.98125e-96	21.0612
SLC8A3	0.663987	1.18884e-97	3.49167e-96	21.0565
KIF26B	0.543354	1.4281e-97	4.18903e-96	21.0501
CAMK2D	0.662183	1.85351e-97	5.4093e-96	21.0349
GPRC5B	1.13284	2.16228e-97	6.30241e-96	21.0344
ENSG00000227757	2.92403	5.49886e-97	1.59467e-95	21.0289
UNC5C	0.761043	3.00422e-97	8.74531e-96	21.012
FRMD5	0.506802	3.98027e-97	1.15573e-95	20.9979
PKNOX2	0.583693	2.73563e-96	7.90342e-95	20.9046
LRBA	0.670295	5.87095e-96	1.69403e-94	20.868
MAP2	0.32699	1.12011e-95	3.22796e-94	20.8388
MYO5A	0.486548	1.22874e-95	3.53659e-94	20.8317
GIPC1	1.09143	4.25445e-95	1.21843e-93	20.777
ARHGAP22	1.5005	3.74291e-94	1.06794e-92	20.6802
TRAF4	1.7714	5.75314e-94	1.63947e-92	20.6631
SHISA7	0.970072	6.39397e-94	1.81983e-92	20.6425
ENSG00000254919	1.57722	9.58284e-94	2.71734e-92	20.6382
AGO3	0.555689	8.73021e-94	2.48169e-92	20.6232
TGFA	2.17141	1.93316e-93	5.47499e-92	20.6141
REPS2	0.858621	1.05314e-92	2.97898e-91	20.5036
HS6ST2	1.00717	3.82278e-92	1.07736e-90	20.4394
NUP42	1.19069	9.17264e-92	2.58193e-90	20.4014
EDNRB	2.15362	1.38096e-91	3.8824e-90	20.3975
ETV1	1.06213	1.61144e-91	4.52481e-90	20.3701
ENSG00000239381	1.7292	2.96933e-91	8.31737e-90	20.3515
NAV1	0.431895	2.27096e-91	6.36895e-90	20.3488
ALPL	2.28718	8.7696e-91	2.44454e-89	20.3096
IKZF2	1.05127	9.80717e-91	2.72715e-89	20.2801
CHD9	0.417031	3.30001e-90	9.1655e-89	20.2155
GRIA3	0.502555	5.21331e-90	1.44621e-88	20.1922
MTSS1	0.431079	7.21609e-90	1.99938e-88	20.1758
UGGT2	0.528871	9.38223e-90	2.59019e-88	20.1623
FAM110B	0.551302	9.62177e-90	2.65314e-88	20.161
RNF157	0.708901	1.13716e-89	3.13188e-88	20.1534
ADAM33	2.50705	2.84914e-89	7.8002e-88	20.1398
GRIN2D	0.97944	1.64952e-89	4.53215e-88	20.1378
THBS2	1.80816	2.51446e-89	6.89213e-88	20.1297
TAFA1	0.545686	2.94912e-89	8.06433e-88	20.1083
SNX1	0.705888	9.34662e-89	2.55278e-87	20.0475
PLPP3	1.00248	1.37583e-88	3.75324e-87	20.0292
PLP1	3.29053	6.62433e-88	1.79858e-86	19.9972
WWP2	0.728469	3.82988e-88	1.04355e-86	19.9763
MMP17	0.831548	4.49781e-88	1.2241e-86	19.9688
KLRK1-AS1	4.39905	1.40928e-87	3.80836e-86	19.9677
NAALAD2	1.38749	5.99829e-88	1.63053e-86	19.9634
CABIN1	0.59212	8.01717e-88	2.17418e-86	19.9379
MTMR9LP	1.6963	1.12511e-87	3.04761e-86	19.9369
EEIG1	0.98959	4.12986e-87	1.11342e-85	19.8591
PLCB4	0.602779	8.09549e-87	2.18e-85	19.82
MNAT1	0.506247	8.95281e-87	2.40804e-85	19.8149
ITGB5	1.32222	1.1372e-86	3.05517e-85	19.81
EPAS1	1.76441	2.58916e-86	6.93166e-85	19.7728
DANT2	0.570722	2.08746e-86	5.59503e-85	19.7717
SH3KBP1	0.602266	3.84226e-86	1.02745e-84	19.7405
DNAH11	1.58751	5.0896e-86	1.35784e-84	19.7369
NFE2L2	0.795491	4.9282e-86	1.31631e-84	19.7291
HES5	2.13119	9.34374e-86	2.48701e-84	19.7164
C2orf80	1.39905	1.91885e-85	5.10148e-84	19.6689
GPR155	1.26166	2.90176e-85	7.70574e-84	19.6453
COL16A1	1.45464	3.58889e-85	9.50849e-84	19.6357
MAGI2	0.32608	3.64568e-85	9.64784e-84	19.6308
ADGRG1	0.911327	3.49297e-85	9.26504e-84	19.6292
ANKRD20A4P	1.32851	2.40646e-84	6.33921e-83	19.5362
DLL3	1.8223	3.1027e-84	8.1546e-83	19.5326
SEMA5B	0.617925	2.44891e-84	6.44366e-83	19.5264
PDGFA	1.91217	5.16828e-84	1.3537e-82	19.51
AHI1	0.62822	7.20574e-84	1.88522e-82	19.4704
PXK	0.716189	9.00156e-84	2.35237e-82	19.4598
DZIP1	0.581806	1.7945e-83	4.67892e-82	19.423
TECPR2	0.648914	1.83376e-83	4.77587e-82	19.4226
ELFN1	0.845571	2.0685e-83	5.38113e-82	19.4166
DENND2A	0.596688	2.14749e-83	5.58032e-82	19.4136
ENSG00000259124	1.31586	4.02123e-83	1.04257e-81	19.3904
TSPAN11	0.839155	3.48404e-83	9.04316e-82	19.3903
ASTN2	0.492312	5.66166e-83	1.46623e-81	19.3659
ENSG00000234173	3.04582	1.22321e-82	3.1607e-81	19.3606
FRMD6	1.30193	1.15494e-82	2.98765e-81	19.3334
MEG3	0.467839	1.63578e-82	4.222e-81	19.3099
SORBS3	1.94549	2.37814e-82	6.13116e-81	19.3076
ENSG00000284634	1.03544	3.11617e-82	8.02492e-81	19.2784
ALOX12P2-1	1.42375	4.72827e-82	1.21629e-80	19.2621
SEPTIN8	1.09566	6.62769e-82	1.70298e-80	19.2397
TSPYL2	1.22465	1.47115e-81	3.77168e-80	19.199
MAPK10	0.445045	1.5019e-81	3.84623e-80	19.1921
LINC01896	2.00449	3.48157e-81	8.90608e-80	19.1648
LPCAT2	1.9179	1.24494e-80	3.17404e-79	19.0976
ENSG00000228793	1.53247	1.98415e-80	5.0531e-79	19.0665
GPR158	0.787143	3.10265e-80	7.88416e-79	19.0329
ENSG00000308267	1.05236	3.32505e-80	8.43997e-79	19.031
LINC00237	3.42363	1.69888e-79	4.2792e-78	18.982
SEMA4D	0.704199	9.5388e-80	2.41324e-78	18.9744
ENSG00000300329	3.0949	1.95389e-79	4.91614e-78	18.9707
PNISR	0.392271	1.12542e-79	2.84411e-78	18.9631
UPF3A	0.488732	1.3219e-79	3.33331e-78	18.954
PLEKHH1	0.857792	2.84874e-79	7.15983e-78	18.9151
ZNF649	1.1213	5.14381e-79	1.28999e-77	18.8865
WNT7B	1.36715	1.16017e-78	2.90006e-77	18.8452
LINC02293	2.83377	2.06675e-78	5.14384e-77	18.8406
ZMIZ1	0.43008	1.7249e-78	4.30701e-77	18.8172
TBC1D5	0.441342	1.77334e-78	4.42316e-77	18.8154
ENSG00000310376	0.546265	1.82563e-78	4.54866e-77	18.8135
RIC3	0.818925	2.34714e-78	5.82907e-77	18.8018
RGCC	2.26312	3.58213e-78	8.87696e-77	18.7974
FBLN7	1.37919	4.18861e-78	1.03687e-76	18.7762
NRIP3	1.82125	8.12773e-78	2.00551e-76	18.7499
EGFEM1P	0.536291	6.68738e-78	1.65365e-76	18.7444
ZNF536	0.63534	7.74446e-78	1.91299e-76	18.7358
PLA2G4A	2.83742	2.56785e-77	6.29561e-76	18.7031
TMEM255A	2.19312	2.33736e-77	5.74277e-76	18.6964
ANKFN1	0.842978	2.0553e-77	5.05516e-76	18.6841
ENSG00000278254	1.85819	3.86274e-77	9.44012e-76	18.6661
GREB1L	1.12845	3.0843e-77	7.54571e-76	18.6655
BMP6	1.90763	4.23935e-77	1.03385e-75	18.6603
LHFPL3-AS1	2.85429	7.30143e-77	1.77684e-75	18.6463
DIPK1A	0.669772	9.16608e-77	2.22825e-75	18.6027
ENSG00000253500	2.18614	3.39165e-76	8.21894e-75	18.5562
EVI5	0.610416	3.42194e-76	8.28362e-75	18.5307
NOMO1	1.05354	3.9465e-76	9.54339e-75	18.5271
TACC2	0.533332	4.6937e-76	1.13383e-74	18.5132
KCNJ16	3.10787	1.09855e-75	2.6426e-74	18.5013
EPHB3	2.15664	1.11438e-75	2.6779e-74	18.4864
MGMT	0.927847	2.38467e-75	5.72446e-74	18.4267
ETS1	1.38721	3.97176e-75	9.49464e-74	18.4014
SWAP70	1.19818	7.56416e-75	1.80449e-73	18.3669
C10orf90	2.2645	2.09733e-74	4.97753e-73	18.3279
FUT10	1.14561	1.76689e-74	4.20197e-73	18.319
EBF4	0.65296	1.78058e-74	4.23016e-73	18.3143
IL17RB	2.64341	6.78264e-74	1.60474e-72	18.267
LINC01201	2.53505	1.45636e-73	3.43506e-72	18.2239
ENSG00000225096	1.31611	1.41991e-73	3.35253e-72	18.2067
PSD3	0.408075	1.78939e-73	4.21193e-72	18.1872
GRAMD1C	1.30395	2.31611e-73	5.44617e-72	18.1786
IRF2	1.05909	4.32402e-73	1.01572e-71	18.1406
HEPACAM	1.95345	7.11637e-73	1.66655e-71	18.1245
PELI1	0.763199	1.16207e-72	2.71587e-71	18.0836
LINC02981	0.861483	1.25382e-72	2.92435e-71	18.0799
DLEU2	0.535237	1.22178e-72	2.85252e-71	18.0796
MTMR9LP-1	1.79735	2.59387e-72	6.03756e-71	18.0521
LINC03002	3.19696	1.1897e-71	2.75525e-70	17.9863
ZMAT1	0.705105	6.68921e-72	1.55386e-70	17.9849
ABHD12	0.648861	9.63262e-72	2.23308e-70	17.9643
RGR	4.04197	2.42706e-71	5.5871e-70	17.9524
SLC22A15	0.916344	1.53859e-71	3.55607e-70	17.9402
MYO10	0.585737	1.51211e-71	3.49839e-70	17.9385
DENND4A	0.532965	2.14228e-71	4.93648e-70	17.9193
RHBDL3	0.915086	3.12889e-71	7.1955e-70	17.8994
PAXBP1	0.534531	6.83201e-71	1.56646e-69	17.8536
CRISPLD1	1.32729	8.09176e-71	1.85345e-69	17.8509
BABAM2	0.547265	2.21971e-70	5.07926e-69	17.7869
TRAF3IP2-AS1	0.444571	2.58806e-70	5.91627e-69	17.7782
MBNL1	0.601568	2.76611e-70	6.317e-69	17.7746
CNP	1.84131	8.2582e-70	1.88407e-68	17.7268
RAB38	3.03363	1.50086e-69	3.42075e-68	17.7077
PCDHGC3	1.81778	1.76853e-69	4.02681e-68	17.6823
INSYN2B	1.19427	1.94588e-69	4.42189e-68	17.6685
ST3GAL5-AS1	2.81554	3.72085e-69	8.43039e-68	17.653
GLYATL2	0.711532	3.97102e-69	8.98833e-68	17.6233
CIT	0.839271	4.14382e-69	9.37024e-68	17.6212
PPM1B	0.714144	4.75084e-69	1.07323e-67	17.6134
MATR3-1	1.41667	6.34491e-69	1.42913e-67	17.6042
ZNF608	0.459519	5.72487e-69	1.29073e-67	17.6018
ARHGEF7	0.398715	8.10707e-69	1.82425e-67	17.5819
MMP2	2.21541	1.57186e-68	3.53353e-67	17.5622
SEC14L2	1.23862	1.98505e-68	4.45804e-67	17.5358
ENSG00000273118	1.25254	6.60431e-68	1.47886e-66	17.4667
ZC3H7A	0.598029	6.0133e-68	1.34784e-66	17.4667
PSAT1	1.02176	2.08247e-67	4.65862e-66	17.3976
FAM66C	0.580151	3.23967e-67	7.24031e-66	17.3693
ENSG00000260604	2.88967	5.75647e-67	1.28401e-65	17.3628
KY	2.45021	5.40362e-67	1.20648e-65	17.3616
ENSG00000298404	3.39238	1.27397e-66	2.8389e-65	17.3206
ENSG00000225330	1.87322	1.8726e-66	4.16481e-65	17.2802
MEIS1	0.750718	1.72646e-66	3.8435e-65	17.2725
OTUD7B	0.783904	3.50614e-66	7.79041e-65	17.2316
GPHN	0.316491	4.07023e-66	9.03504e-65	17.2227
DACH2	0.92673	4.23604e-66	9.38886e-65	17.2215
C3orf70	0.698691	4.23778e-66	9.38886e-65	17.2202
NPAS1	1.07697	5.16856e-66	1.144e-64	17.2103
NECTIN3	0.640119	7.0699e-66	1.56333e-64	17.1898
SHD	2.87268	1.16351e-65	2.56542e-64	17.1856
FBN2	0.767746	1.16616e-65	2.5688e-64	17.1602
BMERB1	0.431579	1.38533e-65	3.04866e-64	17.1499
FYCO1	1.39613	1.8837e-65	4.13749e-64	17.138
PDE3B	0.472779	1.78738e-65	3.92966e-64	17.1348
CREB3L1	2.09195	2.94442e-65	6.43658e-64	17.1212
FBN1	0.788814	2.39329e-65	5.24176e-64	17.1189
LMO1	1.20204	2.80045e-65	6.12768e-64	17.1133
PDE1C	0.498377	3.48357e-65	7.60794e-64	17.0957
RARG	1.97117	4.72146e-65	1.03017e-63	17.0922
GINS3	1.89329	6.97568e-65	1.52057e-63	17.0673
ITGA9	0.729072	7.34428e-65	1.5994e-63	17.0524
FAM222B	0.490467	8.7987e-65	1.91432e-63	17.0409
TSPAN7	0.588565	1.2779e-64	2.77769e-63	17.0191
ATF7IP2	0.779866	1.37494e-64	2.98578e-63	17.0158
SCLT1	0.431399	4.58678e-64	9.94178e-63	16.9431
MSC-AS1	2.72442	6.90918e-64	1.49614e-62	16.9428
FBXO7	0.9973	7.35353e-64	1.59087e-62	16.9181
NEGR1	0.469286	8.36469e-64	1.80792e-62	16.9077
LINC00987	0.710748	1.23677e-63	2.6681e-62	16.8847
ANP32B	0.976205	3.34824e-63	7.21645e-62	16.8269
FAM95B1-1	1.95842	5.80055e-63	1.24902e-61	16.8054
MYO5C	1.47921	6.52159e-63	1.40297e-61	16.7932
RBPJ	0.456789	6.59443e-63	1.41731e-61	16.784
ADAMTS20	2.52073	9.91371e-63	2.12277e-61	16.7798
ENSG00000287881	2.44427	1.10814e-62	2.3684e-61	16.7719
ENSG00000287292	1.32288	9.37928e-63	2.01396e-61	16.769
MDFI	1.95758	1.07269e-62	2.29476e-61	16.7672
BEND7	0.943017	9.4834e-63	2.03442e-61	16.764
ENSG00000288031	3.37124	4.40647e-62	9.37424e-61	16.6977
PON2	1.13239	3.00398e-62	6.40683e-61	16.6957
PHACTR3	0.338808	3.05628e-62	6.50789e-61	16.6922
TMPRSS9	2.46658	1.15924e-61	2.45706e-60	16.6305
KDM2B-DT	1.167	9.01956e-62	1.91526e-60	16.6302
AFAP1	0.448935	1.07376e-61	2.27798e-60	16.6157
ACSL3	0.659835	1.53697e-61	3.25466e-60	16.5946
NINJ2	2.21047	2.06856e-61	4.36429e-60	16.5929
TPP2	0.591747	1.79149e-61	3.78667e-60	16.5851
APPL2	0.471889	1.93977e-61	4.09633e-60	16.5799
RPSAP52-1	1.80454	3.17241e-61	6.68095e-60	16.5614
RAB2A	0.458994	4.09228e-61	8.60239e-60	16.5345
ENSG00000270207	1.07576	4.32953e-61	9.09281e-60	16.5342
NAPEPLD	0.810587	5.02409e-61	1.05419e-59	16.5231
ZC3H12B	0.401263	7.80983e-61	1.63275e-59	16.4955
SGK3	0.868658	1.38337e-60	2.88949e-59	16.4618
KCNK1	1.6348	1.89265e-60	3.9425e-59	16.4501
LINC02984	1.82836	2.2841e-60	4.75363e-59	16.4402
CPNE2	0.843637	2.48754e-60	5.17232e-59	16.4257
STRN	0.596139	2.99612e-60	6.22419e-59	16.4136
SCARB1	0.645757	4.03504e-60	8.36734e-59	16.3951
UTY	0.587716	4.18749e-60	8.66785e-59	16.3927
SRSF6	0.669931	9.09824e-60	1.88158e-58	16.3452
OPHN1	0.41459	9.29713e-60	1.92099e-58	16.3434
ENSG00000254777	1.11718	1.40126e-59	2.89012e-58	16.3213
KIF18B	1.11908	1.73708e-59	3.57954e-58	16.3079
ASIC2	0.537506	2.33669e-59	4.81082e-58	16.2866
JADE3	0.690323	2.37123e-59	4.87757e-58	16.2863
SCPEP1	2.4143	3.47642e-59	7.13178e-58	16.2793
ENSG00000258162	1.29667	3.10818e-59	6.38775e-58	16.2752
KANK2	1.75678	3.59688e-59	7.37232e-58	16.2702
DGCR2	0.595726	3.21098e-59	6.59311e-58	16.2672
RTKN2	1.11138	5.19282e-59	1.06245e-57	16.2406
ASB3	0.464973	5.90518e-59	1.20605e-57	16.2291
ELAVL1	0.614441	6.6515e-59	1.35727e-57	16.222
PAG1	0.564781	7.39596e-59	1.50651e-57	16.2152
ENSG00000226530	1.48612	8.74681e-59	1.78009e-57	16.2121
ENSG00000282278	1.25799	8.84117e-59	1.79771e-57	16.2094
CD96	1.59661	1.38462e-58	2.81042e-57	16.186
OMG	2.08499	4.5861e-58	9.26771e-57	16.1147
LHFPL6	0.555216	3.75555e-58	7.60266e-57	16.1141
ENSG00000286945	1.89844	4.8215e-58	9.7178e-57	16.1101
LINC01572	0.675168	4.65579e-58	9.40028e-57	16.1014
RDX	0.541795	4.73831e-58	9.5585e-57	16.0997
ARHGEF40	0.795025	5.30928e-58	1.06915e-56	16.0936
PRKAR1B	0.465644	5.61613e-58	1.12996e-56	16.089
LIMD1	0.758572	5.75165e-58	1.15621e-56	16.0884
DBX2-AS1	2.03251	9.40743e-58	1.88437e-56	16.0692
LINC-PINT	0.583058	8.28631e-58	1.66428e-56	16.0647
ME1	1.17958	9.28738e-58	1.86209e-56	16.0618
PDZRN3	0.626831	9.41491e-58	1.88437e-56	16.0567
BRCA1	0.743767	9.76626e-58	1.953e-56	16.0549
BRIP1	0.892779	1.98622e-57	3.96503e-56	16.0109
AOPEP	0.40927	2.31396e-57	4.60729e-56	16.0002
CAMKMT	0.614291	3.3784e-57	6.71504e-56	15.9767
LINC00639	2.63383	5.5616e-57	1.10259e-55	15.9636
FAT1	0.931877	4.25717e-57	8.45442e-56	15.9634
B4GALT6	0.810577	5.53256e-57	1.09778e-55	15.9467
ST3GAL6-AS1	1.82992	7.80359e-57	1.54573e-55	15.9343
PSMA1	0.681735	8.13718e-57	1.60903e-55	15.9217
DLG1	0.432241	1.10836e-56	2.1879e-55	15.9015
RAB3C	0.511613	2.45916e-56	4.8419e-55	15.8511
FLJ16779	2.01481	3.20772e-56	6.29418e-55	15.8449
CMYA5	1.37835	2.97256e-56	5.84274e-55	15.8447
CERS4	0.429022	2.81198e-56	5.53184e-55	15.8426
KIFC3	0.748973	3.06599e-56	6.02122e-55	15.838
ABCG1	0.75704	5.3824e-56	1.05344e-54	15.8022
TSPAN15	1.84597	6.35955e-56	1.24363e-54	15.8004
PHLDA1	1.27637	1.08659e-55	2.11766e-54	15.7608
ENSG00000289725	1.22904	1.20185e-55	2.34031e-54	15.7543
RRN3P2	0.777934	1.35169e-55	2.62764e-54	15.7435
TTC39C	0.516362	1.91939e-55	3.72806e-54	15.7203
PRPF38B	0.547627	2.35625e-55	4.56502e-54	15.7072
HFM1	0.619469	3.0882e-55	5.97805e-54	15.6901
SCAF11	0.559563	3.13458e-55	6.06275e-54	15.6889
LINC00632	0.383505	3.23384e-55	6.24947e-54	15.6871
SLAIN1	0.423761	3.59173e-55	6.93526e-54	15.6802
ZBTB20	0.432105	3.99108e-55	7.6999e-54	15.6737
FNDC3B	0.563475	4.18961e-55	8.07615e-54	15.6703
ENSG00000303295	2.73215	5.66164e-55	1.09046e-53	15.6696
VAX2	3.13202	7.99401e-55	1.53454e-53	15.6501
ENSG00000250658	1.78084	7.91753e-55	1.52113e-53	15.6379
SPACDR	2.4297	8.97244e-55	1.71949e-53	15.6363
COLGALT2	1.10492	7.77421e-55	1.49485e-53	15.6337
ENSG00000144785	0.676262	8.07701e-55	1.54918e-53	15.6286
UBE3D	0.581906	1.24648e-54	2.38481e-53	15.6004
LINC01266	1.41146	2.7227e-54	5.20048e-53	15.5558
DSEL	0.875303	4.19424e-54	7.99129e-53	15.5235
NELL1	0.467002	4.1794e-54	7.96963e-53	15.5221
GOLIM4	0.678453	4.92937e-54	9.38416e-53	15.5119
LINC02851	1.21563	7.78898e-54	1.48158e-52	15.4852
PIEZO1	1.88797	1.44236e-53	2.73453e-52	15.4512
PPP2R2A	0.55586	1.45732e-53	2.76062e-52	15.4412
JAZF1	0.366562	1.46682e-53	2.77634e-52	15.4408
ENTPD1-AS1	0.456491	1.8161e-53	3.4318e-52	15.4267
LINC01473	0.525181	1.8914e-53	3.57114e-52	15.4241
TIMP3	0.900483	2.13027e-53	4.01886e-52	15.4174
ENSG00000303606	3.03915	3.0428e-53	5.73097e-52	15.4133
RASGEF1B	0.484195	3.73576e-53	7.03038e-52	15.3798
SHC4	1.20403	4.5411e-53	8.53201e-52	15.3706
TTC8	1.06424	5.23535e-53	9.82836e-52	15.3604
GAD1	0.698402	5.71854e-53	1.07267e-51	15.352
RBM25	0.332834	1.16745e-52	2.18452e-51	15.3053
EXOC7	0.508345	1.19097e-52	2.22672e-51	15.3038
HELLS	0.700498	1.31337e-52	2.45159e-51	15.2977
DNMT3A	0.446252	1.37326e-52	2.5613e-51	15.2944
ASCC3	0.481572	1.47028e-52	2.73782e-51	15.2899
ERCC6L2	0.43007	1.6469e-52	3.06422e-51	15.2825
ENSG00000230490	1.56048	2.12079e-52	3.94275e-51	15.2726
MCC	0.700305	2.21314e-52	4.11111e-51	15.2634
FAM222A	1.16927	2.45554e-52	4.5577e-51	15.2594
GMDS-DT	0.518424	2.57878e-52	4.7826e-51	15.253
PTGER3	1.84662	3.81479e-52	7.06351e-51	15.2371
DNMBP	0.944429	3.62443e-52	6.71643e-51	15.2323
GPM6B	0.394107	7.65001e-52	1.41194e-50	15.1813
CPEB4	0.5087	8.22559e-52	1.51695e-50	15.1765
EHD3	1.35743	1.95018e-51	3.59361e-50	15.1242
KIAA0319L	0.448696	2.2345e-51	4.11424e-50	15.1102
PABPN1	0.44442	4.03074e-51	7.40967e-50	15.0709
ENSG00000308009	2.48817	5.48214e-51	1.00617e-49	15.0638
EXTL1	2.03294	6.01861e-51	1.10375e-49	15.0547
RAPGEF1	0.420366	5.31171e-51	9.75667e-50	15.0527
SV2C	1.1231	6.22592e-51	1.13995e-49	15.0447
RINL	3.4559	9.6359e-51	1.7587e-49	15.0338
BIN1	0.689682	7.55082e-51	1.38034e-49	15.0296
ARHGAP5	0.495078	8.63629e-51	1.57751e-49	15.0203
ITM2C	1.1076	9.94967e-51	1.81453e-49	15.0136
VEPH1	1.01196	1.17391e-50	2.13748e-49	15.0013
SGMS1	0.473797	1.30273e-50	2.37016e-49	14.9926
MGAT4A	0.837428	1.59583e-50	2.89884e-49	14.9802
MAN2A1	0.561512	1.80936e-50	3.28412e-49	14.9708
NEK6	0.572342	2.42157e-50	4.37805e-49	14.9511
CPM	2.47395	3.24435e-50	5.85179e-49	14.9461
ZFAND6	0.665819	2.9345e-50	5.30123e-49	14.9385
NOMO2	1.12054	3.17685e-50	5.73453e-49	14.9359
BTRC	0.41639	3.63031e-50	6.54282e-49	14.9238
STX8	0.471598	4.82838e-50	8.69525e-49	14.9046
OBSL1	0.849253	7.68033e-50	1.38096e-48	14.8747
CCDC144CP	0.676538	9.16105e-50	1.64591e-48	14.8618
JARID2	0.398206	1.59387e-49	2.85915e-48	14.824
CNMD	2.04801	2.35991e-49	4.21685e-48	14.8069
CCDC146	0.48905	2.35297e-49	4.20773e-48	14.7976
ZNF37BP-1	0.423823	2.61825e-49	4.67483e-48	14.7903
TBL1X	0.590055	3.23156e-49	5.76094e-48	14.7761
DTX2P1-UPK3BP1-PMS2P11	0.512	3.83115e-49	6.82456e-48	14.7646
TNRC6C	0.342986	4.40626e-49	7.84294e-48	14.7551
PGM3	0.805621	4.84701e-49	8.62078e-48	14.7496
DNM1	0.404164	5.16472e-49	9.17876e-48	14.7442
MYO9B	0.381486	5.39498e-49	9.58056e-48	14.7413
HAPLN1	2.30482	6.69585e-49	1.18815e-47	14.7381
CACNG8	0.464986	7.64805e-49	1.35607e-47	14.7175
PTPN14	1.2467	8.19347e-49	1.45166e-47	14.7162
TMEM63A	1.68282	9.81445e-49	1.73484e-47	14.7078
MBD5	0.281729	1.14604e-48	2.02424e-47	14.6903
FAM135A	0.465722	1.16957e-48	2.0642e-47	14.6885
DPH6	0.561445	1.73427e-48	3.05616e-47	14.6617
ENSG00000285755	0.80052	1.78851e-48	3.14934e-47	14.6604
ITPR2-AS1	2.2272	3.18396e-48	5.60226e-47	14.6307
SNHG18	2.38509	4.28501e-48	7.52233e-47	14.6114
VSTM4	1.65188	4.06089e-48	7.13431e-47	14.6097
PCDH19	0.638214	5.35858e-48	9.39262e-47	14.5845
CUX1	0.337124	5.57757e-48	9.76159e-47	14.582
STK39	0.408034	6.21401e-48	1.08672e-46	14.574
RNF216	0.42417	7.96416e-48	1.39173e-46	14.5569
BCAT1	0.720325	8.5121e-48	1.48635e-46	14.5532
PALS1	0.894654	9.94347e-48	1.73366e-46	14.5428
HCCS-DT	0.838573	1.06262e-47	1.85129e-46	14.5381
GRHL1	1.29056	1.10924e-47	1.93106e-46	14.5379
PNN	0.397815	1.20259e-47	2.09197e-46	14.5284
RAPGEF6	0.413152	1.22099e-47	2.12238e-46	14.5274
BMP8A	2.34377	2.26101e-47	3.9213e-46	14.4971
RRBP1	0.895453	2.22722e-47	3.86562e-46	14.4871
LYPD1	1.2936	3.81507e-47	6.6016e-46	14.4522
SLC1A3	0.546391	4.09894e-47	7.08747e-46	14.4436
PAPSS2	1.63692	4.81196e-47	8.30785e-46	14.4378
SMAP2	0.584222	6.40028e-47	1.10088e-45	14.4128
MT-RNR2	0.519276	6.44626e-47	1.10796e-45	14.4123
TFCP2	0.459174	8.18685e-47	1.40607e-45	14.3954
NSMCE2	0.455003	8.19925e-47	1.40715e-45	14.3953
ADD3	0.522879	8.93327e-47	1.53084e-45	14.3894
SVIP	1.83785	1.03603e-46	1.77274e-45	14.3865
RFX3-DT	0.634564	9.37376e-47	1.60512e-45	14.3863
ELP4	0.5046	1.19759e-46	2.04614e-45	14.3689
IGSF5	1.83215	1.4457e-46	2.46637e-45	14.3628
CLASP2	0.265944	1.33819e-46	2.28466e-45	14.3616
CHST6	3.02579	1.77101e-46	3.01464e-45	14.3574
TM7SF3	0.694497	1.52662e-46	2.6025e-45	14.3529
GASK1A	0.763415	1.55397e-46	2.64716e-45	14.3515
PDE6D	0.677389	1.78204e-46	3.03118e-45	14.3416
SLC16A10	0.876157	1.86477e-46	3.16956e-45	14.3401
TSPAN12	2.04849	3.49553e-46	5.93698e-45	14.3028
PPFIBP1	0.476554	4.5094e-46	7.65334e-45	14.2761
ARL15	0.35345	6.43555e-46	1.09063e-44	14.2513
BDNF-AS	0.9868	9.53975e-46	1.6155e-44	14.2252
ENSG00000244055	0.711034	1.10132e-45	1.86365e-44	14.2139
OTX2	2.29587	1.40646e-45	2.37651e-44	14.206
SPRY4-AS1	0.509576	1.55887e-45	2.63018e-44	14.1888
KSR1	0.414234	1.6449e-45	2.7733e-44	14.1849
CENPP	0.484275	2.56452e-45	4.31744e-44	14.1536
NCAM1	0.194575	2.92774e-45	4.92533e-44	14.1451
GMPR	1.946	3.21088e-45	5.39375e-44	14.1448
LIX1	2.14692	3.43254e-45	5.76191e-44	14.142
SPRY2	1.22726	3.20461e-45	5.38717e-44	14.1407
PRRC2C	0.317485	3.66321e-45	6.14463e-44	14.1284
SFSWAP	0.377149	3.7332e-45	6.25747e-44	14.1269
CNNM2	0.453496	4.10535e-45	6.87624e-44	14.1202
METRN	2.06324	5.01677e-45	8.39059e-44	14.1144
CRYL1	0.870897	4.55972e-45	7.63172e-44	14.114
GNB4	0.6833	5.93894e-45	9.92572e-44	14.0946
VPS13B	0.332609	5.97037e-45	9.971e-44	14.0936
RARB	0.716335	8.73202e-45	1.45726e-43	14.0674
PLEKHB1	2.90788	1.33173e-44	2.21765e-43	14.0505
ENSG00000287862	0.766434	1.16076e-44	1.93435e-43	14.0468
TRAF3	0.462616	1.83777e-44	3.0559e-43	14.0134
ENSG00000259072	3.00371	2.79764e-44	4.6453e-43	13.9993
ZCCHC17	0.622185	2.91688e-44	4.83979e-43	13.9807
SHC2	0.525149	3.45143e-44	5.72261e-43	13.9683
EPC2	0.407538	4.23432e-44	7.01561e-43	13.9536
XKR4	0.336465	4.49394e-44	7.44039e-43	13.9501
TANC2	0.246502	4.79582e-44	7.9345e-43	13.9452
CYP4F24P	1.86666	5.61558e-44	9.28407e-43	13.9394
CLASRP	0.499713	5.65913e-44	9.34935e-43	13.9328
ZHX3	0.401311	6.52868e-44	1.07782e-42	13.9224
LINC01145-1	0.945513	7.5201e-44	1.23882e-42	13.9139
PHF21B	0.356834	7.97921e-44	1.31351e-42	13.9082
MKRN3	0.486296	9.48816e-44	1.5608e-42	13.8956
PRKG2	0.530582	1.02797e-43	1.6898e-42	13.8898
JDP2	1.53657	1.30268e-43	2.13984e-42	13.8771
PAPSS1	0.481629	1.35213e-43	2.21948e-42	13.87
GPATCH2	0.620474	1.36114e-43	2.23268e-42	13.8698
KCNAB1	0.619557	1.37678e-43	2.25673e-42	13.8688
CHD6	0.336173	1.44033e-43	2.35921e-42	13.8655
EIF1B-AS1	0.680135	1.58838e-43	2.59986e-42	13.8587
MFGE8	0.850323	1.80187e-43	2.94719e-42	13.8498
PHF21A	0.355208	1.87135e-43	3.05866e-42	13.8465
ASIC1	0.503823	2.63888e-43	4.31011e-42	13.8216
RAB6A	0.389584	2.94657e-43	4.80925e-42	13.8136
SPSB4	0.601118	2.96278e-43	4.83228e-42	13.8134
LINC02731	1.56174	3.6487e-43	5.94257e-42	13.803
RAB9A	1.12196	3.90942e-43	6.3582e-42	13.7954
SUGT1P3-1	0.55731	4.54917e-43	7.39345e-42	13.7822
ZDHHC21	0.460649	5.39757e-43	8.7661e-42	13.7696
GSG1L	0.752337	5.51818e-43	8.95565e-42	13.7685
NES	0.804106	7.03597e-43	1.14028e-41	13.751
LANCL2	0.672017	7.3908e-43	1.19695e-41	13.7472
ARL4A	2.31318	8.69836e-43	1.40672e-41	13.7451
ENSG00000265702	1.97389	1.03294e-42	1.66699e-41	13.7297
SNRNP70	0.386119	1.00504e-42	1.62424e-41	13.7243
CAPN2	0.617632	1.11939e-42	1.80523e-41	13.7167
EXOSC10	0.445792	1.12563e-42	1.81402e-41	13.716
ENSG00000228933	2.21166	1.60564e-42	2.58577e-41	13.7005
NECAB2	1.35488	2.24802e-42	3.61523e-41	13.6691
ENSG00000290549	1.18483	2.45863e-42	3.95116e-41	13.662
ENSG00000294469	0.986697	3.05545e-42	4.90685e-41	13.6448
TJAP1	0.882515	3.20743e-42	5.14733e-41	13.6404
PLEKHG1	0.607612	4.12753e-42	6.61469e-41	13.621
TNFRSF10B	1.80165	4.70787e-42	7.53083e-41	13.6174
PDE8A	0.583305	4.58535e-42	7.34327e-41	13.6132
PWWP3A	0.471761	4.70902e-42	7.53083e-41	13.6112
LINC02277	1.49849	5.98737e-42	9.56856e-41	13.5988
MTA3	0.477078	7.52618e-42	1.20194e-40	13.5766
CKMT2-AS1	0.482086	8.4408e-42	1.34707e-40	13.5682
SNPH	0.634684	1.02826e-41	1.63987e-40	13.5539
GDF11	0.752349	1.14277e-41	1.82123e-40	13.5464
GLTP	0.879561	1.52105e-41	2.42241e-40	13.5257
KCNMA1	0.348604	1.76156e-41	2.8035e-40	13.5141
RND2	2.10526	2.01935e-41	3.20933e-40	13.5115
ENSG00000290410	1.04621	2.04532e-41	3.24836e-40	13.5046
ENSG00000229618	1.1748	2.2694e-41	3.60176e-40	13.4986
DTL	1.00621	2.42048e-41	3.83888e-40	13.4914
ZFP36L2	1.71491	2.71167e-41	4.29775e-40	13.4864
MAD2L1-DT	1.03634	3.12231e-41	4.94516e-40	13.4732
DSE	0.537793	3.3929e-41	5.37003e-40	13.4652
SPON1	0.650432	3.4902e-41	5.52023e-40	13.4632
DNAJC1	0.414002	3.66767e-41	5.79693e-40	13.4593
ADAMTS6	0.627392	4.12928e-41	6.51757e-40	13.4506
SPIDR	0.304707	4.62252e-41	7.29108e-40	13.4423
MKLN1	0.370358	5.46199e-41	8.60929e-40	13.4296
GNE	0.64522	7.35794e-41	1.15898e-39	13.4078
CADM4	0.621978	7.36542e-41	1.15936e-39	13.4076
TDRD3	0.513903	9.60446e-41	1.51077e-39	13.3876
PARP4	0.927417	1.31264e-40	2.06194e-39	13.3651
ENSG00000261227	1.96722	1.47571e-40	2.31335e-39	13.3622
AKNA	0.788116	1.45559e-40	2.28493e-39	13.357
HSP90B1	0.601832	1.46836e-40	2.30341e-39	13.356
JUN-DT	1.04456	2.18044e-40	3.40649e-39	13.3281
DNMT1	0.440818	2.15954e-40	3.37614e-39	13.3268
NEB	1.18925	3.4372e-40	5.36628e-39	13.2943
SAPCD2	2.13707	3.81233e-40	5.94791e-39	13.2918
CENPM	0.941832	4.26845e-40	6.65501e-39	13.2766
LINC01138	0.543624	6.51707e-40	1.0154e-38	13.2437
SLC7A14	0.969523	7.78286e-40	1.21098e-38	13.2318
PLEKHG3	1.1408	8.14198e-40	1.266e-38	13.2289
VAV3	0.867862	9.46935e-40	1.46941e-38	13.2162
TAPT1-AS1	0.5121	1.32674e-39	2.05462e-38	13.1898
TTLL9	0.777891	1.5317e-39	2.37043e-38	13.1796
DHX32	0.785254	1.54105e-39	2.38329e-38	13.1791
SLIT2	0.495693	1.58061e-39	2.44283e-38	13.1765
HCG18	0.316337	1.75182e-39	2.70561e-38	13.1687
EEF1D	0.611712	1.77378e-39	2.7377e-38	13.1679
ENSG00000249526	1.00385	2.45399e-39	3.77235e-38	13.1443
ANKRD55	1.10387	3.67158e-39	5.63278e-38	13.1143
AJAP1	0.595303	4.18789e-39	6.4206e-38	13.1024
N4BP2L1	0.907876	4.33823e-39	6.64665e-38	13.1007
CACNA1D	0.42019	4.96278e-39	7.59848e-38	13.0893
USP2	2.00398	6.22921e-39	9.52481e-38	13.0786
ANKRD18CP	1.01039	7.6088e-39	1.16188e-37	13.0582
RBMS3	0.479402	8.26602e-39	1.2614e-37	13.0502
RGMB	0.890653	8.73827e-39	1.33259e-37	13.0472
ZDHHC11B	0.433972	9.11368e-39	1.38892e-37	13.0428
ENSG00000248994	1.41619	9.82009e-39	1.49459e-37	13.0403
PRR5L	0.883892	9.65395e-39	1.47028e-37	13.0393
URI1	0.4991	1.01284e-38	1.54049e-37	13.0347
HNRNPL	0.514743	1.24548e-38	1.89308e-37	13.0188
RCC2	0.555166	1.26996e-38	1.92901e-37	13.0174
ELMO1	0.344049	1.76313e-38	2.67635e-37	12.9924
DSCAM	0.280883	2.43815e-38	3.69612e-37	12.9672
HSD17B12	0.402356	2.47595e-38	3.75094e-37	12.9659
SEMA6A	0.398018	3.0927e-38	4.67913e-37	12.9487
CXXC5	0.720362	3.11818e-38	4.71459e-37	12.9485
EML2	0.618845	3.30732e-38	4.99727e-37	12.9438
MEF2C-AS2	0.573795	3.92953e-38	5.93351e-37	12.9305
MIDN	0.710701	4.05958e-38	6.12586e-37	12.9281
ADAMTS9-AS2	0.733414	6.23648e-38	9.38615e-37	12.895
MIATNB	0.466802	6.90424e-38	1.03844e-36	12.8865
ENSG00000283674	0.487984	7.421e-38	1.11543e-36	12.881
ENSG00000293925	2.37245	9.88548e-38	1.48489e-36	12.867
SGO1-AS1	0.917412	1.17407e-37	1.76241e-36	12.8465
LTBP3	0.472382	1.52852e-37	2.29298e-36	12.8247
SATB1-AS1	0.556596	1.64578e-37	2.46727e-36	12.8189
VPS13C	0.319367	1.87879e-37	2.81476e-36	12.8086
GPC3	1.49514	2.49237e-37	3.72915e-36	12.79
CBFB	0.537806	2.59893e-37	3.88606e-36	12.7834
PARP8	0.48915	3.38171e-37	5.04995e-36	12.7627
ZNF804A	0.322768	3.64027e-37	5.43253e-36	12.7571
ENSG00000226471	0.87145	5.07934e-37	7.5752e-36	12.7316
ENSG00000260683	2.32467	9.33688e-37	1.38978e-35	12.691
ZNF438	0.470488	1.05304e-36	1.56541e-35	12.6734
SGTA	0.707778	1.13142e-36	1.68083e-35	12.6681
AMOTL2	0.781585	1.46372e-36	2.17169e-35	12.648
STARD9	0.447985	1.75431e-36	2.60115e-35	12.633
TMEM178B	0.224126	1.85878e-36	2.75251e-35	12.6288
EGFR	0.680592	1.89615e-36	2.80604e-35	12.627
CD82	1.43593	2.06597e-36	3.05145e-35	12.6231
ZGRF1	0.687495	2.24059e-36	3.30725e-35	12.614
REST	0.803047	2.44366e-36	3.60006e-35	12.6074
RCL1	0.720491	2.77111e-36	4.07463e-35	12.5973
TMEM212	3.36736	3.26772e-36	4.79871e-35	12.5961
SLC38A6	0.472426	2.88972e-36	4.24633e-35	12.5935
SPART	0.606286	3.80495e-36	5.58407e-35	12.5718
LAPTM4B	0.993645	3.94003e-36	5.77863e-35	12.5701
SIL1	0.393732	4.01462e-36	5.88427e-35	12.5673
TPCN2	0.555952	4.91857e-36	7.20461e-35	12.5513
TTTY14	0.408218	5.10983e-36	7.47999e-35	12.5482
SH2B3	0.906382	5.67704e-36	8.30501e-35	12.5409
KIF3A	0.408242	6.41711e-36	9.37575e-35	12.53
MFAP3	0.615245	1.07856e-35	1.57383e-34	12.4888
CAST-1	0.708161	1.16259e-35	1.6943e-34	12.4831
FANCD2	0.87589	1.18055e-35	1.71938e-34	12.4821
FAM83D	1.42247	1.31213e-35	1.90982e-34	12.4761
ENSG00000306279	2.5966	1.79103e-35	2.60356e-34	12.4567
LINGO3	1.5545	1.91646e-35	2.78413e-34	12.4463
LINC02649	0.918058	1.9236e-35	2.79275e-34	12.4429
NUP210	0.571687	2.101e-35	3.04837e-34	12.4352
ATXN2-AS	0.636627	2.3244e-35	3.36613e-34	12.4272
TSPAN3	0.516505	2.80013e-35	4.05252e-34	12.412
CYP2J2	2.3557	3.36757e-35	4.8707e-34	12.4043
RNF2	0.625126	3.4331e-35	4.96235e-34	12.3959
ARHGEF1	0.495912	4.46206e-35	6.43751e-34	12.3744
ENSG00000290466	2.33516	4.92961e-35	7.10315e-34	12.3738
MATR3	0.32192	4.71417e-35	6.79697e-34	12.37
TSC22D4	1.15037	5.08177e-35	7.31324e-34	12.3655
ANO6	0.474909	5.03895e-35	7.25614e-34	12.3646
VAT1L	0.576405	6.73335e-35	9.66585e-34	12.3412
SMYD3	0.271595	7.6175e-35	1.09214e-33	12.3312
CDH8	0.506226	7.62379e-35	1.09236e-33	12.3311
CIRBP	0.514316	9.0397e-35	1.29363e-33	12.3173
ENSG00000290880	0.901046	9.49769e-35	1.35832e-33	12.3141
PTGDS	2.23373	1.08718e-34	1.55003e-33	12.3078
CHD1L	0.656594	1.02105e-34	1.45936e-33	12.3077
DRP2	0.940758	1.03983e-34	1.48436e-33	12.3069
TBC1D14	0.423369	1.02994e-34	1.47115e-33	12.3067
ASAP1	0.287246	1.17426e-34	1.67313e-33	12.2961
CLIP2	0.274703	1.40298e-34	1.99655e-33	12.2816
LRRC4B	0.344119	1.75125e-34	2.48602e-33	12.2635
SLC38A3	1.57425	1.9374e-34	2.74858e-33	12.2584
STEAP1B-AS1	1.59402	1.96504e-34	2.78436e-33	12.2574
RNF130	0.212603	2.05534e-34	2.9105e-33	12.2507
UBR1	0.34977	2.0747e-34	2.93612e-33	12.2497
ANKRD28	0.330723	2.8405e-34	4.01494e-33	12.224
ANKHD1	0.337801	2.86389e-34	4.0455e-33	12.2234
ZZZ3	0.406651	3.03092e-34	4.27358e-33	12.2187
NASP	0.364453	3.05685e-34	4.3075e-33	12.218
FBXO38-DT	0.37614	3.16994e-34	4.46139e-33	12.2151
EPB41L4A	0.36198	3.62279e-34	5.08628e-33	12.2042
RBM39	0.325124	3.81123e-34	5.34758e-33	12.2
PI4K2B	0.653556	4.3957e-34	6.16014e-33	12.1886
ENSG00000308288	0.750023	5.08837e-34	7.1265e-33	12.1767
SLC27A1	0.425269	5.70148e-34	7.97548e-33	12.167
TRIM14	1.00647	6.6489e-34	9.28383e-33	12.1557
ASAP3	0.801155	6.67438e-34	9.31376e-33	12.1545
CAPS2	0.818026	7.00331e-34	9.76684e-33	12.1507
ARHGEF26	0.779721	7.28114e-34	1.01481e-32	12.1473
SNAP91	0.277557	7.91133e-34	1.10131e-32	12.1402
DIAPH3	0.576727	9.57655e-34	1.33232e-32	12.1244
KSR2	0.501522	1.22039e-33	1.69681e-32	12.1044
ENSG00000189229	0.912435	1.3341e-33	1.85267e-32	12.0982
RPS6KA3	0.449957	1.33119e-33	1.84975e-32	12.0972
LRRN3	0.69159	1.36271e-33	1.89012e-32	12.0957
KIF15	0.688186	1.36239e-33	1.89012e-32	12.0955
LENG8	0.388574	1.43034e-33	1.98273e-32	12.0912
ENSG00000291041	0.566971	1.48479e-33	2.05697e-32	12.0884
TMEM196	0.586819	1.57869e-33	2.18442e-32	12.0832
PIK3R3	0.393324	1.58538e-33	2.19236e-32	12.0827
SMC1A	0.426499	2.27423e-33	3.13928e-32	12.0529
COL9A2	0.838388	2.65364e-33	3.65643e-32	12.0407
HIP1R	0.40611	2.79235e-33	3.84525e-32	12.0359
LINC03073	0.633263	3.47051e-33	4.77055e-32	12.018
FBXO10	0.603188	3.73696e-33	5.13068e-32	12.0119
ENSG00000296481	0.343889	3.87066e-33	5.31107e-32	12.0088
ADAM22	0.370889	4.60671e-33	6.31726e-32	11.9943
ETV6	0.432247	4.87482e-33	6.68095e-32	11.9895
MINDY1	1.12212	5.0685e-33	6.93811e-32	11.9879
GULP1	0.457048	6.49549e-33	8.87562e-32	11.9656
KIF14	0.914565	6.81151e-33	9.29089e-32	11.9626
SLITRK1	0.781131	7.04256e-33	9.59465e-32	11.9595
ZC3HAV1	1.34664	8.54504e-33	1.1621e-31	11.9448
CARD8	0.609085	8.68977e-33	1.18108e-31	11.9415
NACC2	1.01455	9.634e-33	1.3071e-31	11.9337
KNL1	0.771124	1.0252e-32	1.39013e-31	11.9279
ENSG00000305271	0.343182	1.0911e-32	1.47861e-31	11.9223
PCYT1B	0.659639	1.18935e-32	1.6108e-31	11.9154
FGD3	0.527894	1.21308e-32	1.64197e-31	11.9135
DDX11	0.819149	1.27074e-32	1.71902e-31	11.9102
ZNF586	0.37675	1.29998e-32	1.75753e-31	11.9076
GPBP1	0.380398	1.32586e-32	1.79147e-31	11.9059
ENSG00000304724	2.41807	1.6022e-32	2.16231e-31	11.8968
PTK2	0.238417	1.48692e-32	2.00791e-31	11.8965
CCSER2	0.316555	1.63589e-32	2.20649e-31	11.8883
CCDC50	0.426372	1.71093e-32	2.30634e-31	11.8846
C5orf67	1.96565	2.28325e-32	3.07424e-31	11.8656
LITAF	1.01069	2.30117e-32	3.09655e-31	11.8606
RRM2	0.633297	2.33823e-32	3.14458e-31	11.8584
DYNLL1	0.78702	3.29533e-32	4.4214e-31	11.83
MT-RNR1	0.44541	3.96541e-32	5.31735e-31	11.8138
ENSG00000272865	0.890856	4.31418e-32	5.78166e-31	11.8072
ATP2C2	0.693335	4.5639e-32	6.11276e-31	11.8022
CACNG7	0.397974	4.73411e-32	6.33704e-31	11.7988
ERCC6L2-AS1	0.479386	5.53486e-32	7.40031e-31	11.7856
SYNPO2L-AS1	0.810843	5.78666e-32	7.73247e-31	11.7824
ENSG00000299795	1.17257	5.96302e-32	7.96351e-31	11.7809
LRRC8D	0.363396	6.01896e-32	8.03355e-31	11.7784
SNX25	0.374437	7.38514e-32	9.83416e-31	11.7611
RHBDF1	2.29883	8.05152e-32	1.07153e-30	11.76
TRAK1	0.362474	8.38859e-32	1.11575e-30	11.7503
C9orf85	0.701092	9.10524e-32	1.21037e-30	11.7438
SLX4IP	0.511127	9.2241e-32	1.22546e-30	11.7423
MAPKAP1	0.357409	9.50211e-32	1.26093e-30	11.7397
KLF15	1.80559	1.029e-31	1.36392e-30	11.7366
VPS9D1	0.541548	9.9179e-32	1.31535e-30	11.7362
BLTP3A	0.604321	1.17743e-31	1.55885e-30	11.7216
STAT5B	0.383664	1.22256e-31	1.61768e-30	11.7182
MLEC	0.643334	1.40512e-31	1.85816e-30	11.7067
CTHRC1	2.47644	1.54999e-31	2.04857e-30	11.7048
LINC02763	1.02278	1.59008e-31	2.10035e-30	11.6971
PXDN	0.348626	1.63067e-31	2.15273e-30	11.6937
MOV10	0.865593	1.64479e-31	2.17013e-30	11.6935
NRIP3-DT	1.30199	1.73326e-31	2.28554e-30	11.6909
UBR3	0.299434	1.78181e-31	2.34687e-30	11.6862
ENSG00000225559	1.32844	1.83795e-31	2.41942e-30	11.6856
ENSG00000259713	0.712922	2.29772e-31	3.01947e-30	11.6647
TANGO6	0.420317	2.33203e-31	3.06281e-30	11.6631
RCN2	0.559339	2.37458e-31	3.1169e-30	11.6617
PGM1	0.988215	2.68298e-31	3.5157e-30	11.6523
HDAC1	0.775539	2.96194e-31	3.87681e-30	11.6431
ARC	2.42454	3.25919e-31	4.26346e-30	11.6404
CCDC159	1.2193	4.21e-31	5.50411e-30	11.6141
TGFB2	0.686549	4.4297e-31	5.78806e-30	11.6084
METTL25	0.620042	4.58282e-31	5.98473e-30	11.6055
NCOR2	0.288896	5.05639e-31	6.59941e-30	11.5968
RPH3A	0.725185	5.53222e-31	7.21637e-30	11.5894
TIGAR	0.57829	7.0754e-31	9.21365e-30	11.568
PACC1	0.659538	7.21888e-31	9.39517e-30	11.5664
C1orf105	1.98376	8.11066e-31	1.05439e-29	11.5608
RPGR	0.677797	7.74963e-31	1.00802e-29	11.5602
LINC01505	0.528344	8.92758e-31	1.15862e-29	11.5478
ENSG00000302210	1.38321	9.3626e-31	1.21439e-29	11.546
VCAN	0.287743	1.21741e-30	1.57639e-29	11.5212
ATRNL1	0.276518	1.22888e-30	1.59035e-29	11.5203
ENSG00000253374	1.3335	1.28256e-30	1.65889e-29	11.5184
BCAN-AS2	2.0605	1.399e-30	1.80645e-29	11.5137
GABRA3	0.467805	1.32885e-30	1.7178e-29	11.5134
XRCC2	0.831162	1.38035e-30	1.78337e-29	11.5105
OLFM2	0.277458	1.57861e-30	2.03608e-29	11.4984
CLEC2D	0.587542	1.62654e-30	2.09673e-29	11.496
GNG2	0.322571	1.69066e-30	2.17816e-29	11.4924
KRCC1	0.674914	1.81287e-30	2.33168e-29	11.4867
ZFHX4-AS1	0.780341	2.23694e-30	2.8723e-29	11.4685
RBMS2	0.65281	2.38819e-30	3.0648e-29	11.4626
MIR924HG	0.603142	2.78448e-30	3.56938e-29	11.4492
GALNT3	1.12999	3.48923e-30	4.46781e-29	11.431
FUS	0.322869	3.64111e-30	4.65969e-29	11.4257
ENSG00000255750	1.88781	3.99439e-30	5.10895e-29	11.4218
OTX2-AS1	1.09561	4.83814e-30	6.1847e-29	11.4023
BEST1	1.78949	5.08819e-30	6.50073e-29	11.4001
ENSG00000289503	1.29945	6.7709e-30	8.63618e-29	11.3734
DOT1L	0.356386	6.68133e-30	8.52666e-29	11.3726
ZFPM1	0.655265	7.76639e-30	9.88398e-29	11.3596
ENSG00000299197	0.908684	8.58022e-30	1.09076e-28	11.3513
ENSG00000301643	0.873736	8.71033e-30	1.10669e-28	11.3501
ARHGAP6	0.77812	9.0908e-30	1.1544e-28	11.346
CORO7	0.519647	9.33898e-30	1.18526e-28	11.3433
SUCLG2-DT	1.13331	9.5521e-30	1.21164e-28	11.3425
ENSG00000287306	1.59822	1.01923e-29	1.29071e-28	11.3384
TRPC4	0.609352	9.89801e-30	1.25413e-28	11.3382
ENSG00000296041	2.91532	1.08476e-29	1.37142e-28	11.3377
CDC14B	0.422964	1.02114e-29	1.29241e-28	11.3353
EDIL3-DT	1.00035	1.07354e-29	1.35799e-28	11.3322
TMEM229B	0.736471	1.12008e-29	1.4153e-28	11.3276
PLPP1	0.479915	1.28919e-29	1.6263e-28	11.3149
AMPH	0.418401	1.29522e-29	1.63302e-28	11.3144
SATB1	0.668715	1.34693e-29	1.69728e-28	11.3112
TAF4B	1.02637	1.47336e-29	1.85557e-28	11.3042
PIP5K1A	0.370387	1.59967e-29	2.01355e-28	11.2958
ENSG00000285741	0.950128	1.63954e-29	2.06261e-28	11.2944
TMOD2	0.373981	1.6426e-29	2.06533e-28	11.2934
ENSG00000287975	1.21853	1.76359e-29	2.21624e-28	11.2888
ITPRID2	0.638274	1.76714e-29	2.21949e-28	11.2872
DTNA	0.335374	1.78579e-29	2.2417e-28	11.2861
PCDH10-DT	0.946255	1.85282e-29	2.32456e-28	11.2838
COL5A3	1.38653	1.94495e-29	2.43749e-28	11.2805
SHLD1	0.591715	2.45279e-29	3.07059e-28	11.2582
WWC2	0.462227	2.46687e-29	3.08654e-28	11.2575
DGKA	0.871524	2.68395e-29	3.3545e-28	11.2507
DGKH	0.448533	2.9487e-29	3.68139e-28	11.2417
ARHGAP12	0.478525	3.63696e-29	4.53821e-28	11.2231
MALRD1	0.700684	3.7136e-29	4.63133e-28	11.2215
ZNF75D	0.622972	3.74261e-29	4.66497e-28	11.2207
SH3GLB2	0.754734	4.25971e-29	5.30376e-28	11.2095
AK9	0.488166	4.28231e-29	5.32902e-28	11.2086
PPP6R2	0.263376	4.7609e-29	5.91819e-28	11.1992
FRMPD1	1.37236	4.91223e-29	6.103e-28	11.1985
SS18	0.626761	5.4592e-29	6.77524e-28	11.1872
SLITRK3	1.33973	5.91822e-29	7.34096e-28	11.1819
SPC25	0.817034	6.36298e-29	7.88838e-28	11.1737
STIM2	0.420316	7.13655e-29	8.83787e-28	11.1631
CHKA	0.396499	7.47642e-29	9.2488e-28	11.1589
TRAF3IP2	1.17171	7.65173e-29	9.46058e-28	11.1583
BRWD3	0.368393	7.86313e-29	9.71673e-28	11.1544
GOLM1	0.304663	8.58547e-29	1.06037e-27	11.1465
SGCE	0.475092	9.3528e-29	1.15328e-27	11.1389
SLC4A4	0.517312	9.59705e-29	1.18276e-27	11.1366
MYRFL	1.46526	9.99674e-29	1.23004e-27	11.1355
SLC12A4	1.04733	9.81187e-29	1.20859e-27	11.1354
CCDC150	0.833894	9.99124e-29	1.23002e-27	11.1336
ENSG00000309543	0.988401	1.02584e-28	1.26156e-27	11.1316
LINC01182	0.984348	1.05317e-28	1.29448e-27	11.1291
RHPN2	1.17687	1.1062e-28	1.35821e-27	11.1252
DNAJC3	0.626258	1.11548e-28	1.36887e-27	11.1233
INPPL1	0.931288	1.16153e-28	1.42463e-27	11.1201
NAMA	0.367172	1.1879e-28	1.45619e-27	11.1174
AP3B1	0.39706	1.23356e-28	1.51135e-27	11.1141
LDAH	0.433589	1.6404e-28	2.00554e-27	11.0885
JAM3	0.329509	1.74204e-28	2.12755e-27	11.0831
CDK8	0.33365	1.84024e-28	2.24628e-27	11.0781
SPOCK2	0.798992	1.86962e-28	2.28093e-27	11.0772
PNISR-AS1	0.673338	1.88436e-28	2.2977e-27	11.0763
EGR1	1.00797	1.90214e-28	2.31815e-27	11.076
SFTA3-1	1.49385	1.97023e-28	2.39986e-27	11.074
NEK1	0.319291	2.05472e-28	2.50145e-27	11.0682
GALNT7	0.560384	2.34109e-28	2.84405e-27	11.0566
LINC00869-1	0.726541	2.42976e-28	2.94711e-27	11.0536
INF2	0.733394	3.10153e-28	3.75993e-27	11.0314
VPS13A	0.401601	3.11862e-28	3.77866e-27	11.0306
BCL6	0.488538	3.30881e-28	4.00699e-27	11.0253
TRIP11	0.379268	3.36421e-28	4.07193e-27	11.0237
JPX	0.288721	3.50942e-28	4.24546e-27	11.0199
GREB1	0.699404	3.66785e-28	4.43478e-27	11.0162
CCDC88A	0.206128	4.46894e-28	5.3977e-27	10.9983
PDE8B	0.456794	4.83788e-28	5.84025e-27	10.9909
ENSG00000287855	1.60247	4.99989e-28	6.03266e-27	10.9906
WASF1	0.306165	5.4609e-28	6.58544e-27	10.9799
ANKRD6	0.4545	5.68139e-28	6.84774e-27	10.9763
CAMTA1	0.210453	5.92365e-28	7.13227e-27	10.9726
CHD4	0.384352	6.32786e-28	7.61495e-27	10.9665
ZNF638	0.213482	6.5017e-28	7.82007e-27	10.9642
TRIM9	0.33385	6.68277e-28	8.03365e-27	10.9616
DUSP6	2.0433	7.40428e-28	8.89171e-27	10.9562
LSAMP-AS1	1.2029	7.39426e-28	8.88432e-27	10.9538
UBL3	0.374678	7.44225e-28	8.93265e-27	10.9518
SPTBN5	1.86218	7.94062e-28	9.52584e-27	10.9495
HDAC8	0.279918	8.15087e-28	9.77297e-27	10.9435
ZFAND4	0.875467	8.70007e-28	1.04206e-26	10.9382
TTN-AS1	0.370846	9.80721e-28	1.17406e-26	10.9266
VGLL4	0.295014	1.22312e-27	1.46348e-26	10.9065
SMOC2	0.957969	1.26719e-27	1.51385e-26	10.904
ZFHX3-AS1	0.455252	1.26224e-27	1.50871e-26	10.9036
GBF1	0.297704	1.4384e-27	1.71749e-26	10.8917
MTCL2	0.266508	1.4493e-27	1.72961e-26	10.891
KDM3A	0.428819	1.48568e-27	1.7721e-26	10.8887
DMXL2	0.31124	1.56182e-27	1.86196e-26	10.8841
ADCY6	0.394969	1.57689e-27	1.87895e-26	10.8833
NR6A1	0.423502	1.69637e-27	2.01922e-26	10.8766
MB21D2	0.359263	1.70525e-27	2.02874e-26	10.8761
XPNPEP1	0.644927	1.75882e-27	2.0914e-26	10.8735
PEG3	0.422136	1.77693e-27	2.11184e-26	10.8723
SLC10A7	0.415546	1.89042e-27	2.2444e-26	10.8667
ATF7IP	0.322795	1.92874e-27	2.28871e-26	10.8648
ENSG00000302636	1.03797	2.03827e-27	2.41619e-26	10.8607
CDYL	0.455563	2.11423e-27	2.50365e-26	10.8564
ANKRD20A7P	0.826065	2.32057e-27	2.74658e-26	10.8484
ENSG00000309266	1.9946	2.61176e-27	3.08805e-26	10.841
ZNF488	2.27693	2.69037e-27	3.17773e-26	10.8391
ENSG00000291225	0.990786	2.62908e-27	3.10693e-26	10.8373
PLXNB1	0.430267	2.85839e-27	3.37445e-26	10.8287
MAN1A2	0.306797	3.24861e-27	3.83119e-26	10.8169
TXNDC11	0.604863	3.35741e-27	3.95544e-26	10.8141
ENSG00000242588	0.268216	3.37058e-27	3.96893e-26	10.8135
TENT5A	1.1508	3.52851e-27	4.14853e-26	10.8106
MAP1A	0.667473	3.52253e-27	4.14361e-26	10.8097
PHKA1	0.947571	3.60907e-27	4.24107e-26	10.8078
FGF2	0.924103	3.64956e-27	4.28647e-26	10.8069
EDIL3	0.372301	3.76327e-27	4.41776e-26	10.8034
PUDP	0.405122	3.82072e-27	4.48291e-26	10.802
SRBD1	0.46634	3.88561e-27	4.55672e-26	10.8005
HMGA2	0.579281	4.10164e-27	4.80761e-26	10.7955
NFASC	0.239941	4.46402e-27	5.2297e-26	10.7876
PRDM5	0.749796	4.58667e-27	5.36792e-26	10.7855
ASXL2	0.416988	4.79496e-27	5.60883e-26	10.781
ENSG00000288765	0.822243	4.87209e-27	5.69616e-26	10.78
ENSG00000290853	0.584365	5.33926e-27	6.236e-26	10.7713
SCLY	0.579359	5.40345e-27	6.30778e-26	10.7701
HERC2	0.271596	5.46175e-27	6.37259e-26	10.769
CPEB2	0.5114	6.1704e-27	7.19213e-26	10.7578
ZNF721	0.314144	6.52523e-27	7.60186e-26	10.7525
RPL13	0.640996	6.58523e-27	7.66788e-26	10.7519
KCTD2	0.750978	6.75414e-27	7.86057e-26	10.7498
RASSF8-AS1	1.25254	6.93402e-27	8.06584e-26	10.7483
SUPT3H	0.28247	9.53021e-27	1.10634e-25	10.7174
MATN2	1.24811	9.94985e-27	1.15447e-25	10.7149
SCN1A-AS1	0.957975	1.11654e-26	1.29355e-25	10.7035
CACNA2D2	0.577221	1.16585e-26	1.35e-25	10.6987
ENSG00000286163	1.34507	1.22308e-26	1.41556e-25	10.6961
CD27-AS1	0.900826	1.23296e-26	1.42628e-25	10.6941
NOMO3	1.03672	1.24138e-26	1.43529e-25	10.6938
MFSD4B	0.484351	1.32971e-26	1.53587e-25	10.6864
DIPK1C	1.48699	1.86283e-26	2.1495e-25	10.6569
CPXM1	1.02099	2.19176e-26	2.52398e-25	10.6405
RNFT2	0.426268	2.18564e-26	2.5182e-25	10.64
ANOS2P	0.427557	2.26862e-26	2.60987e-25	10.6365
FOXO1	0.750413	2.39951e-26	2.75908e-25	10.6315
DNAJC24	0.628023	2.47344e-26	2.84266e-25	10.6286
CCDC18-AS1	0.430221	2.63611e-26	3.02659e-25	10.6225
ENSG00000285582	0.406493	2.78401e-26	3.19321e-25	10.6173
MTOR	0.357836	2.92578e-26	3.35415e-25	10.6127
TMEM41A	1.14158	2.98561e-26	3.42093e-25	10.612
ENSG00000291166	0.946244	2.98701e-26	3.42093e-25	10.6114
DMWD	0.535709	3.49483e-26	3.99854e-25	10.5961
SYT10	1.56678	3.61704e-26	4.13631e-25	10.5949
LINC01579	1.4241	3.78854e-26	4.33027e-25	10.5906
STAC2	1.60703	3.82101e-26	4.36522e-25	10.5898
ZNF800	0.644008	3.88977e-26	4.44156e-25	10.5862
ENSG00000258561	0.523153	4.29265e-26	4.89916e-25	10.5768
FBXO17	0.600321	4.29788e-26	4.90269e-25	10.5767
TAFA5	0.241318	4.69632e-26	5.35455e-25	10.5683
GPSM1	0.358065	4.74946e-26	5.41246e-25	10.5671
TRA2A	0.268999	4.79291e-26	5.45927e-25	10.5663
TMCC3	0.91655	4.90303e-26	5.58193e-25	10.5649
ST8SIA1	0.328187	5.08933e-26	5.79116e-25	10.5606
FGFR1OP2	0.676866	5.16907e-26	5.87898e-25	10.5594
DLL1	0.704232	5.97043e-26	6.78369e-25	10.5459
PRTFDC1	0.483125	6.20403e-26	7.04564e-25	10.542
ARHGEF6	0.838047	6.26117e-26	7.10702e-25	10.5415
LMCD1	1.41183	6.4439e-26	7.30721e-25	10.5399
DGKI	0.258147	6.36503e-26	7.22134e-25	10.5396
FAM66D	0.407166	6.72499e-26	7.6222e-25	10.5343
APBA2	0.251322	7.30516e-26	8.27571e-25	10.5266
LOXL3	0.531387	7.36341e-26	8.33758e-25	10.5259
MAN2C1	0.542822	7.75675e-26	8.77865e-25	10.5209
CDHR1	0.998061	7.92645e-26	8.96629e-25	10.5195
POLA1	0.365226	7.94647e-26	8.98451e-25	10.5185
LINC01416	2.16802	8.5373e-26	9.63358e-25	10.516
GATAD1	0.591176	8.30942e-26	9.39026e-25	10.5145
P4HA1	0.46021	8.37695e-26	9.45728e-25	10.5136
ANKRD44	0.241794	8.62941e-26	9.73274e-25	10.5108
ENSG00000274265	0.674599	8.86584e-26	9.99449e-25	10.5085
LRRC1	0.482769	9.32797e-26	1.05103e-24	10.5034
IDH1	0.525789	9.477e-26	1.0673e-24	10.502
CHADL	1.76857	9.99945e-26	1.12504e-24	10.4996
ENSG00000284906	0.524741	9.81415e-26	1.10473e-24	10.4986
ANGEL1	0.568957	1.02372e-25	1.15123e-24	10.4947
CHST7	1.5092	1.16837e-25	1.31261e-24	10.4841
NSRP1	0.398972	1.15249e-25	1.2954e-24	10.4833
ENSG00000298255	2.08369	1.26413e-25	1.4195e-24	10.4786
ENSG00000282381	0.854126	1.48939e-25	1.66917e-24	10.4594
SPRED2	0.342027	1.50453e-25	1.68532e-24	10.458
LUC7L2	0.348631	1.51349e-25	1.69454e-24	10.4574
LINC02666	0.941709	1.61732e-25	1.80903e-24	10.4518
DEK	0.433954	1.60995e-25	1.80165e-24	10.4515
ENSG00000223774	2.04145	1.7028e-25	1.9037e-24	10.4498
BARD1	0.649125	1.79295e-25	2.00352e-24	10.4415
BAHCC1	0.395337	1.83923e-25	2.05424e-24	10.4389
NIPAL3	0.727942	1.91057e-25	2.13288e-24	10.4355
GOLGA8A	0.364175	2.02026e-25	2.25424e-24	10.4299
ARMCX4	0.356935	2.06606e-25	2.30311e-24	10.4278
SPAG9	0.250456	2.18354e-25	2.43289e-24	10.4225
ENSG00000302775	2.16802	2.58244e-25	2.87595e-24	10.4104
TCHP	0.631025	2.58809e-25	2.88085e-24	10.4064
ENSG00000303171	1.65203	2.8532e-25	3.17134e-24	10.3992
UTRN	0.371994	2.81384e-25	3.1291e-24	10.3983
RXRA	0.532395	2.90924e-25	3.23207e-24	10.3951
XRCC4	0.621947	2.92722e-25	3.25048e-24	10.3946
CLSPN	0.882384	3.05419e-25	3.38983e-24	10.3908
RFC3	0.408578	3.31822e-25	3.67932e-24	10.3825
MBNL2	0.396573	3.44459e-25	3.8176e-24	10.3789
GUSBP5-1	0.47854	3.49558e-25	3.87225e-24	10.3775
NBPF8	0.690111	3.58081e-25	3.96475e-24	10.3754
VPS45	0.334975	3.59059e-25	3.97366e-24	10.3749
CLIP4	0.486763	3.97306e-25	4.39272e-24	10.3653
CLSTN1	0.349324	4.31908e-25	4.7707e-24	10.3572
EML4	0.392906	4.61195e-25	5.09175e-24	10.3509
SORCS1	0.332041	5.20376e-25	5.73686e-24	10.3395
COMMD1	0.342789	5.72502e-25	6.30246e-24	10.3301
BRD7	0.449307	5.81809e-25	6.40185e-24	10.3285
ENSG00000302067	1.12402	6.42759e-25	7.06912e-24	10.3199
MDM4	0.335915	6.93455e-25	7.62304e-24	10.3116
ENSG00000280119	1.18173	7.19182e-25	7.90206e-24	10.3094
PTGR3	0.708803	7.67432e-25	8.42417e-24	10.3021
ANKRD11	0.209812	7.94487e-25	8.71699e-24	10.2986
ABCA2	0.517846	8.01921e-25	8.79437e-24	10.2977
RPSA2	0.718915	8.31435e-25	9.10501e-24	10.2943
MRC2	0.659876	8.42492e-25	9.2217e-24	10.2929
TEAD1	0.2979	8.6299e-25	9.44158e-24	10.2905
SRSF4	0.323021	8.70504e-25	9.51924e-24	10.2896
CACNA1A	0.246927	1.00695e-24	1.10009e-23	10.2758
VPS54	0.312911	1.12286e-24	1.22439e-23	10.265
CFAP20	0.818816	1.15251e-24	1.25612e-23	10.2629
DTWD2	0.736991	1.28698e-24	1.40069e-23	10.2521
EXO1	1.06126	1.29635e-24	1.41022e-23	10.2519
ENSG00000297708	0.970694	1.34052e-24	1.45758e-23	10.2485
ITPK1	0.343134	1.401e-24	1.52263e-23	10.2435
WASF3	0.436908	1.4978e-24	1.62706e-23	10.2371
LINC01550	0.932313	1.69145e-24	1.83569e-23	10.2257
SPG11	0.336961	1.6873e-24	1.83205e-23	10.2255
EEA1	0.342369	1.72723e-24	1.87364e-23	10.2232
MEGF10	0.549388	1.73497e-24	1.88115e-23	10.2228
RADX	1.20409	1.84138e-24	1.99558e-23	10.2182
ENSG00000203335	1.80774	1.95982e-24	2.12094e-23	10.2137
STXBP4	0.387844	1.94743e-24	2.10853e-23	10.2115
ENSG00000286787	0.655426	1.98218e-24	2.14412e-23	10.21
PRKCE	0.232172	2.48406e-24	2.68197e-23	10.1879
TRMT11	0.354198	2.48678e-24	2.68365e-23	10.1877
UNK	0.334461	2.74592e-24	2.96191e-23	10.178
DTNBP1	0.534674	2.75547e-24	2.97082e-23	10.1778
GRID2IP	1.04875	2.86353e-24	3.08588e-23	10.1748
PIK3CB	0.366949	2.94247e-24	3.16797e-23	10.1712
LPAR4	1.72319	3.24319e-24	3.48848e-23	10.164
ZNF730	0.41913	3.44126e-24	3.69806e-23	10.1559
SIK2	0.347806	3.44928e-24	3.70495e-23	10.1557
PTGFRN	0.429275	3.53639e-24	3.79674e-23	10.1533
FLRT3	1.23764	3.59926e-24	3.86244e-23	10.1528
DDX59	0.62182	3.87315e-24	4.15055e-23	10.1445
MFAP3L	1.02775	4.18443e-24	4.47995e-23	10.1376
LINC01727	1.39541	4.33524e-24	4.63926e-23	10.1345
KMT2C	0.195284	4.47601e-24	4.78767e-23	10.1303
SALL2	1.19577	4.57851e-24	4.89502e-23	10.129
CADPS2	0.654481	4.67909e-24	5.00023e-23	10.126
ENSG00000299261	1.03945	5.27454e-24	5.63132e-23	10.1147
MIR4422HG	2.24614	5.4995e-24	5.86333e-23	10.1139
PABIR3	0.883139	5.39813e-24	5.76059e-23	10.1122
PCTP	0.873169	5.42571e-24	5.78734e-23	10.1118
MTCL1	0.317777	5.56025e-24	5.92535e-23	10.1088
AGFG1	0.362956	6.03568e-24	6.42605e-23	10.1008
NCAPD3	0.49268	6.32174e-24	6.72749e-23	10.0963
KCNH5	0.49864	7.68849e-24	8.17817e-23	10.077
CTSC	1.13526	8.309e-24	8.83004e-23	10.0702
LINC03009	0.251056	9.05276e-24	9.61156e-23	10.0608
ITSN2	0.331981	9.12577e-24	9.68014e-23	10.06
UGP2	0.474855	1.07169e-23	1.13522e-22	10.0442
GSAP	0.709768	1.07665e-23	1.13995e-22	10.044
TLL1	0.923085	1.11131e-23	1.1761e-22	10.041
ENPP7P2	1.00267	1.20172e-23	1.27061e-22	10.0336
IL6ST	0.84758	1.37907e-23	1.45479e-22	10.0195
SLC26A3	0.335859	1.49896e-23	1.58054e-22	10.0108
APPBP2	0.332547	1.50503e-23	1.58621e-22	10.0104
TOM1L2	0.284591	1.58088e-23	1.66539e-22	10.0056
TMEM38B	0.55574	1.60684e-23	1.69119e-22	10.0041
SART1	0.475447	1.64614e-23	1.73176e-22	10.0016
BACE1	0.416417	1.96344e-23	2.06462e-22	9.98403
ADAMTS9	0.565085	2.00953e-23	2.11212e-22	9.98177
BMS1P14-1	1.23082	2.07255e-23	2.17636e-22	9.97988
CEP83	0.428857	2.04844e-23	2.15203e-22	9.9798
MSH5	0.582507	2.3039e-23	2.41489e-22	9.96817
LINC01786	0.941264	2.32152e-23	2.43226e-22	9.96788
WDPCP	0.26177	2.37103e-23	2.483e-22	9.96524
MIR193BHG	1.1203	2.6139e-23	2.73609e-22	9.95668
ATP6V0A2	0.400131	2.70197e-23	2.8257e-22	9.95221
RNF150	0.255052	2.87504e-23	3.00534e-22	9.94603
COG4	0.444608	2.91999e-23	3.05093e-22	9.94445
OTUD7A	0.279397	3.00194e-23	3.13513e-22	9.94168
SPATA13	0.355378	3.10349e-23	3.23824e-22	9.93834
ROR2	1.01634	3.12984e-23	3.26426e-22	9.93812
GDF1	0.395307	3.29261e-23	3.43247e-22	9.93243
ENSG00000289201	0.772779	3.56277e-23	3.71241e-22	9.92489
POLA2	0.710702	3.78475e-23	3.94194e-22	9.91867
ENSG00000302538	2.4572	3.98923e-23	4.15115e-22	9.91735
FANCA	0.42919	4.53656e-23	4.71642e-22	9.90032
AEBP1	0.942064	4.75703e-23	4.94117e-22	9.89609
TLK1	0.349843	4.94254e-23	5.12923e-22	9.8917
UNC13A	0.284335	5.29021e-23	5.48755e-22	9.88487
MEIKIN	1.0543	5.48831e-23	5.68791e-22	9.882
MIR31HG	1.50592	5.62464e-23	5.82394e-22	9.88057
CRTC3-AS1	0.594115	6.4301e-23	6.65495e-22	9.86535
TMEM51	1.01091	6.48642e-23	6.71022e-22	9.86496
LINC01418	0.627094	7.49893e-23	7.74721e-22	9.84994
CREM	0.505609	7.59347e-23	7.84136e-22	9.84854
KDM3B	0.318973	7.81252e-23	8.06394e-22	9.8456
LAMA1	0.465931	7.90122e-23	8.15183e-22	9.84446
LINC00472	0.565373	8.5334e-23	8.80012e-22	9.83678
ENSG00000286980	2.12253	8.8235e-23	9.09113e-22	9.83654
MMP15	0.87322	8.77548e-23	9.04571e-22	9.83436
ZNF334	0.534471	9.04935e-23	9.31966e-22	9.83085
CHD2	0.232128	9.09924e-23	9.36684e-22	9.83027
ENSG00000188897	0.993865	9.22922e-23	9.4964e-22	9.82907
DDX60L	1.07322	9.38871e-23	9.65186e-22	9.82774
CEP112	0.31888	9.35611e-23	9.62265e-22	9.8274
REEP3	0.432415	9.76801e-23	1.00328e-21	9.82307
CSTF3-DT	1.19182	1.07418e-22	1.1028e-21	9.81438
PAAF1	0.530569	1.07515e-22	1.10331e-21	9.81341
KAT2A	0.722081	1.13229e-22	1.16091e-21	9.80832
MAEL	1.56892	1.16654e-22	1.19496e-21	9.80698
SIPA1L3	0.235288	1.15187e-22	1.18046e-21	9.8064
ENSG00000286615	1.15609	1.29807e-22	1.3291e-21	9.79509
ENSG00000295317	1.31256	1.33344e-22	1.36471e-21	9.7929
RECK	0.392626	1.35044e-22	1.38088e-21	9.79024
ECE2	0.799974	1.44549e-22	1.47741e-21	9.78373
RASSF2	0.426335	1.57645e-22	1.61056e-21	9.77454
DUSP16	0.55095	1.66106e-22	1.69624e-21	9.76927
PRKCQ-AS1	2.18489	1.80926e-22	1.84512e-21	9.76374
SCML4	0.99488	1.77343e-22	1.80939e-21	9.76335
CCDC14	0.266557	1.76119e-22	1.7977e-21	9.76325
HNRNPA2B1	0.23581	1.83429e-22	1.86983e-21	9.75914
ENSG00000306426	1.88109	1.90403e-22	1.9392e-21	9.75802
AFF1	0.525984	1.87453e-22	1.91e-21	9.75695
DOCK3	0.172403	1.95806e-22	1.99333e-21	9.75271
PCOLCE2	1.00254	2.08882e-22	2.12551e-21	9.74661
ERCC8	0.322737	2.10848e-22	2.14457e-21	9.74492
EPN2-AS1	2.05164	2.31498e-22	2.35253e-21	9.73831
ZNF652	0.342431	2.30627e-22	2.34471e-21	9.73578
ENSG00000267383	0.455367	2.48329e-22	2.52022e-21	9.72826
ARID1A	0.235611	2.58836e-22	2.6257e-21	9.72404
NRF1	0.328229	2.97874e-22	3.01904e-21	9.70964
ENSG00000307977	1.3081	3.19611e-22	3.2365e-21	9.70367
CD9	1.67599	3.37084e-22	3.41194e-21	9.69886
MCM3AP	0.340461	3.9062e-22	3.94861e-21	9.68188
SLC38A10	0.539989	3.94067e-22	3.9817e-21	9.68106
THOP1	0.605332	4.01549e-22	4.05374e-21	9.67917
MTA1	0.326713	4.06035e-22	4.09723e-21	9.67791
HRK	2.1492	4.17994e-22	4.2142e-21	9.67789
DDX39B	0.325378	4.06537e-22	4.10049e-21	9.67778
ENSG00000303790	0.71935	4.39602e-22	4.42818e-21	9.67003
TBC1D2	0.721199	4.72218e-22	4.75464e-21	9.66264
FBN3	0.25283	5.13386e-22	5.16526e-21	9.65382
LURAP1	1.37909	5.26557e-22	5.29482e-21	9.65258
MIR493HG	0.889169	5.29718e-22	5.32427e-21	9.65108
ACTN4	0.314291	5.33787e-22	5.36282e-21	9.6498
GPD1	1.83917	5.78595e-22	5.80286e-21	9.64388
FAM182A	0.63572	5.84401e-22	5.85853e-21	9.64064
GNL3L	0.464234	6.20037e-22	6.21307e-21	9.63441
MYO6	0.30761	6.83871e-22	6.84675e-21	9.62427
KLHL20	0.403878	7.08125e-22	7.08649e-21	9.62069
WDR62	0.850111	7.59729e-22	7.593e-21	9.61378
LINC03051	0.951371	7.98919e-22	7.98121e-21	9.60883
PCBP3	0.488544	8.13e-22	8.11835e-21	9.60645
PWRN1	0.26647	8.74032e-22	8.72022e-21	9.59893
TIMP2	0.290266	8.90929e-22	8.8811e-21	9.59695
CENPK	0.652613	9.05861e-22	9.02603e-21	9.59536
LRPAP1	0.562668	9.35496e-22	9.31728e-21	9.59198
PHF8	0.440095	9.46114e-22	9.41896e-21	9.59075
LRATD1	1.17477	9.57213e-22	9.52532e-21	9.59062
PRP4K	0.32088	1.0147e-21	1.0093e-20	9.58348
AKAP7	0.430548	1.0695e-21	1.06335e-20	9.57807
ARVCF	0.441452	1.07474e-21	1.0681e-20	9.57755
PEPD	0.457261	1.11437e-21	1.107e-20	9.5738
RAD54B	0.516444	1.12721e-21	1.11927e-20	9.57265
TRA2B	0.350452	1.23906e-21	1.22928e-20	9.56276
LIN52	0.417002	1.2631e-21	1.25258e-20	9.56079
ENPP2	1.27061	1.39846e-21	1.38503e-20	9.55158
FAM13A	0.272474	1.38896e-21	1.37681e-20	9.55093
ENSG00000288891	0.300998	1.39432e-21	1.38152e-20	9.5505
PLXNB3-AS1	2.32745	1.46491e-21	1.44897e-20	9.54865
SETX	0.293786	1.42468e-21	1.40978e-20	9.54826
BRMS1L	0.560924	1.65083e-21	1.63146e-20	9.53304
ENSG00000269026	0.759043	1.97972e-21	1.95481e-20	9.51428
FAR2P2	1.03459	2.3029e-21	2.27295e-20	9.49887
ENSG00000287877	1.38196	2.41319e-21	2.38078e-20	9.49471
MPHOSPH8	0.309269	2.53495e-21	2.49877e-20	9.48817
ENPP1	1.78344	2.75785e-21	2.71383e-20	9.48151
CAMK1D	0.209341	2.72104e-21	2.6799e-20	9.48084
SLC12A2-DT	0.373299	2.74586e-21	2.70319e-20	9.47982
TMEM50B	0.591449	2.9066e-21	2.85654e-20	9.474
ENSG00000285329	0.553674	2.99454e-21	2.94171e-20	9.47082
HAS2-AS1	1.34497	3.16739e-21	3.10886e-20	9.46618
ENSG00000309311	1.40396	3.27057e-21	3.20739e-20	9.46294
RASA3	0.322707	3.3437e-21	3.27771e-20	9.45916
STOX2	0.264641	3.35313e-21	3.28555e-20	9.4589
PLEKHA2	0.934821	3.3916e-21	3.32183e-20	9.45814
PRR15-DT	0.331172	3.43059e-21	3.35859e-20	9.45647
CRIPT	0.467719	3.75955e-21	3.67752e-20	9.44691
PABPC1L	0.660781	3.79422e-21	3.70985e-20	9.44607
RNF13	0.397754	3.99161e-21	3.89953e-20	9.44059
SLC19A3	1.58024	4.31702e-21	4.21564e-20	9.43413
RHOQ	0.528127	4.44657e-21	4.33847e-20	9.42929
AQP6	2.68375	4.66046e-21	4.5433e-20	9.42817
CTBP2	0.216897	4.67246e-21	4.55308e-20	9.42407
ZSWIM6	0.20736	5.18452e-21	5.04991e-20	9.41315
MTMR1	0.384688	5.28901e-21	5.14951e-20	9.41094
ENSG00000265073	1.83687	5.57129e-21	5.42205e-20	9.40752
ACIN1	0.258927	5.65502e-21	5.5012e-20	9.40389
WDR41	0.419884	5.9417e-21	5.77765e-20	9.39868
PLOD3	0.561809	5.97697e-21	5.80948e-20	9.39813
RYR1	0.737608	6.4755e-21	6.28873e-20	9.38972
MAD1L1	0.270184	6.776e-21	6.56946e-20	9.38479
LRIG2	0.404844	7.17911e-21	6.95736e-20	9.37869
DDX12B	1.04553	7.40876e-21	7.17689e-20	9.37599
BRSK1	0.407374	8.15957e-21	7.8909e-20	9.36513
DOP1A	0.260434	8.7485e-21	8.45333e-20	9.35773
ENSG00000286086	1.27927	9.71469e-21	9.3751e-20	9.3477
LINC02774	0.768312	1.05218e-20	1.0137e-19	9.33845
ARSB	0.361875	1.05619e-20	1.01713e-19	9.33774
SGSM1	0.294287	1.0586e-20	1.01903e-19	9.3375
HMGB1	0.276375	1.14423e-20	1.101e-19	9.32923
ZRANB3	0.348375	1.19096e-20	1.14548e-19	9.32497
RBBP7	0.560819	1.25409e-20	1.2057e-19	9.31958
PCDH1	0.508627	1.26107e-20	1.21191e-19	9.31895
CTSV	0.817662	1.27762e-20	1.2273e-19	9.31786
CYB5R4	0.377628	1.28094e-20	1.22946e-19	9.31723
ENSG00000254553	0.609366	1.29897e-20	1.24572e-19	9.31589
SNRPN	0.258916	1.31053e-20	1.25628e-19	9.31479
SEPTIN9	0.394044	1.34968e-20	1.29327e-19	9.31165
GOLGB1	0.268357	1.39084e-20	1.33216e-19	9.30846
ADRA1B	1.04183	1.40629e-20	1.3464e-19	9.30791
ZNF146	0.354998	1.49774e-20	1.43336e-19	9.30056
ENSG00000307088	0.494219	1.70041e-20	1.62596e-19	9.28705
GPCPD1	0.343014	1.73219e-20	1.65566e-19	9.28503
MASP1	0.476065	1.74174e-20	1.66409e-19	9.28447
ZNF560	2.3819	1.87341e-20	1.78841e-19	9.2799
SLC26A11	0.652581	1.88232e-20	1.79617e-19	9.27628
ERCC5	0.439017	1.96374e-20	1.87231e-19	9.27165
GABBR1	0.249785	1.97816e-20	1.88528e-19	9.27085
IPMK	0.43704	2.12345e-20	2.02207e-19	9.26328
CCDC180	0.42473	2.16862e-20	2.06337e-19	9.26102
ANKRD26	0.27122	2.1907e-20	2.08352e-19	9.25992
INVS	0.28931	2.23053e-20	2.12053e-19	9.25799
TUBB4A	0.853411	2.41314e-20	2.29318e-19	9.25002
STXBP3	0.615341	2.44173e-20	2.31843e-19	9.24843
TCFL5	0.629317	2.66077e-20	2.52433e-19	9.23921
TAF8	0.780372	2.73799e-20	2.59652e-19	9.23628
MCM8	0.696667	2.88302e-20	2.73293e-19	9.23062
OFD1	0.319446	3.08982e-20	2.92655e-19	9.22301
ERF	0.980322	3.16601e-20	2.99748e-19	9.22087
ANKRD20A2P	1.59764	3.23187e-20	3.05732e-19	9.21976
MED13	0.262972	3.36128e-20	3.17842e-19	9.21396
PPP1R14C	0.399289	3.85322e-20	3.64061e-19	9.19925
ZNF274	0.443305	3.97953e-20	3.7584e-19	9.19578
GNAL	0.301339	3.98447e-20	3.76153e-19	9.19564
PCBP4	0.366986	4.41721e-20	4.16835e-19	9.18451
VPS35L	0.310021	4.47296e-20	4.21923e-19	9.18315
CDC45	0.980604	4.54304e-20	4.28357e-19	9.18185
ZNF43	0.400967	4.63044e-20	4.36419e-19	9.17942
RHOXF1	0.52292	4.70099e-20	4.42887e-19	9.17785
INTS13	0.689642	5.10644e-20	4.80888e-19	9.16902
NRDE2	0.40832	5.84789e-20	5.50262e-19	9.15417
CHAF1A	0.484631	6.48404e-20	6.09123e-19	9.143
LINC00174	0.466877	6.68021e-20	6.27296e-19	9.13979
RCBTB1	0.596559	6.69538e-20	6.28464e-19	9.13961
CRTAP	0.934086	6.84839e-20	6.42302e-19	9.1375
ENSG00000293268	0.421541	7.02086e-20	6.58209e-19	9.13437
LINC01816	0.631177	7.40486e-20	6.93927e-19	9.12871
ENSG00000301982	2.04232	8.17726e-20	7.65063e-19	9.12012
KNTC1	0.467654	8.00977e-20	7.50002e-19	9.12005
SPPL3	0.246625	8.08664e-20	7.56892e-19	9.119
ZNF551	0.515448	8.30645e-20	7.76834e-19	9.11613
RASSF10-DT	1.67647	8.74408e-20	8.17429e-19	9.11201
ENSG00000225811	1.85628	9.48124e-20	8.85981e-19	9.10384
CALD1	0.329273	9.50565e-20	8.87902e-19	9.1014
ADGRA1-AS1	1.88926	1.01744e-19	9.49978e-19	9.09616
DIS3L	0.622903	1.02009e-19	9.5207e-19	9.09385
GBE1	0.524045	1.03152e-19	9.62345e-19	9.09257
C1QTNF7-AS1	0.402993	1.08543e-19	1.01223e-18	9.08694
NHLRC2	0.343903	1.09473e-19	1.02049e-18	9.086
NDRG3	0.372848	1.12653e-19	1.04886e-18	9.08289
ATP2B2	0.237538	1.13757e-19	1.05871e-18	9.08184
DDX12P	1.08428	1.19106e-19	1.1076e-18	9.07745
DNHD1	0.503998	1.31387e-19	1.2213e-18	9.06614
SH3BGRL2	0.240017	1.39806e-19	1.29904e-18	9.05931
ABCC5	0.287945	1.46357e-19	1.35881e-18	9.05427
SCARB2	0.334372	1.52957e-19	1.41894e-18	9.04945
USP45	0.806962	1.61031e-19	1.49203e-18	9.0441
LRFN5-DT	1.45153	1.64817e-19	1.52588e-18	9.04256
RB1	0.298841	1.63735e-19	1.51647e-18	9.04198
ENSG00000309880	0.632667	1.75275e-19	1.6214e-18	9.03466
ZNF90	0.80788	1.91217e-19	1.76816e-18	9.02522
MAGI2-AS3	0.619247	2.02249e-19	1.86867e-18	9.01893
BTAF1	0.293843	2.0435e-19	1.88733e-18	9.01766
CENPC	0.368599	2.33332e-19	2.15154e-18	9.00308
TNFRSF21	0.397999	2.40443e-19	2.21622e-18	8.99983
SFPQ	0.192138	2.47085e-19	2.27653e-18	8.99682
ARL5A	0.481433	2.56674e-19	2.36393e-18	8.99263
KHDC1-AS1	0.355645	2.57679e-19	2.37224e-18	8.99214
ENSG00000257703	1.93294	2.83891e-19	2.61145e-18	8.98365
NFATC3	0.326384	2.86052e-19	2.63029e-18	8.98062
SLF2	0.32504	3.22546e-19	2.96466e-18	8.96736
TYW3	0.726761	3.2494e-19	2.98547e-18	8.96676
STON2	0.533829	3.27466e-19	3.00749e-18	8.96572
ANK3	0.171578	3.45025e-19	3.16748e-18	8.96036
DAPK2	0.470231	3.50252e-19	3.2129e-18	8.95828
DISP1	0.284828	3.81371e-19	3.4914e-18	8.94883
TTC21B	0.308076	4.00949e-19	3.66917e-18	8.94329
ENSG00000286481	0.964811	4.04357e-19	3.69888e-18	8.94302
ROCR	1.25738	4.07966e-19	3.73042e-18	8.94221
SLC9A8	0.446412	4.18932e-19	3.82917e-18	8.93846
WDR74	0.392424	4.42658e-19	4.04281e-18	8.93232
COPG2IT1	0.338675	5.12311e-19	4.67339e-18	8.91609
GNG4	0.288204	6.26232e-19	5.7058e-18	8.89376
COL19A1	0.498366	6.38945e-19	5.81934e-18	8.89156
ENSG00000285082	1.2127	7.26491e-19	6.61406e-18	8.87804
DCBLD1	0.88971	7.27704e-19	6.62248e-18	8.87737
PDE4A	0.610067	7.43883e-19	6.76704e-18	8.87471
GTF2I	0.225543	7.507e-19	6.82636e-18	8.87356
TMEM259	0.44025	7.65097e-19	6.95452e-18	8.87145
CAPN5	0.547077	7.78405e-19	7.0699e-18	8.86957
ENSG00000291149	1.3272	7.91416e-19	7.1824e-18	8.86865
GCC2	0.310431	7.89512e-19	7.16795e-18	8.86791
ZNF114	1.09289	8.42411e-19	7.64218e-18	8.86126
ATP2B1-AS1	0.964138	8.95065e-19	8.11344e-18	8.85444
LINC00402	1.17151	9.19803e-19	8.3344e-18	8.85157
ENSG00000290546	0.545758	9.44148e-19	8.55163e-18	8.848
SP4	0.405119	1.00652e-18	9.10577e-18	8.84076
UBTD1	1.04712	1.08144e-18	9.77591e-18	8.83322
FAM120C	0.467236	1.11609e-18	1.00852e-17	8.8292
STAT3	0.377596	1.17528e-18	1.06117e-17	8.82337
AP3D1	0.319604	1.18446e-18	1.06862e-17	8.82249
PON3	1.70448	1.20796e-18	1.08939e-17	8.82178
ZNF318	0.311073	1.28564e-18	1.15832e-17	8.81328
EEF2K	0.404152	1.41283e-18	1.27116e-17	8.80269
ENSG00000293232	1.27731	1.44428e-18	1.29895e-17	8.8011
TMEM168	0.426855	1.54395e-18	1.38696e-17	8.79271
STX16	0.339517	1.65899e-18	1.48798e-17	8.78459
WFDC1	1.5892	1.73887e-18	1.55902e-17	8.78072
POLN	0.502705	1.77335e-18	1.58931e-17	8.77713
MTMR2	0.363779	1.77489e-18	1.59007e-17	8.77698
L3MBTL2-AS1	1.18694	1.85254e-18	1.65834e-17	8.77286
TASOR2	0.286941	1.88638e-18	1.68798e-17	8.77009
KIAA1755	0.664269	1.98042e-18	1.77075e-17	8.7647
TOX3	0.250868	2.01777e-18	1.80345e-17	8.76252
HDHD2	0.432426	2.06991e-18	1.84933e-17	8.75963
TYRO3	0.630508	2.15937e-18	1.92851e-17	8.75496
UHRF1	0.673728	2.34806e-18	2.09458e-17	8.74545
PLCE1	0.306811	2.37692e-18	2.11951e-17	8.744
NR4A1	0.843482	2.56476e-18	2.28611e-17	8.73554
OBI1-AS1	0.722942	2.64039e-18	2.35262e-17	8.7322
ENSG00000270605	1.34452	2.78693e-18	2.48127e-17	8.72677
CBX4	0.884692	2.77694e-18	2.47333e-17	8.72667
ERGIC1	0.290116	2.89779e-18	2.57797e-17	8.72149
PYGL	1.05573	2.94798e-18	2.62161e-17	8.72005
BRCA2	0.781889	3.11129e-18	2.76454e-17	8.71367
ATP1A1-AS1	0.707271	3.11231e-18	2.76454e-17	8.71355
MCM10	0.896344	3.20837e-18	2.84876e-17	8.71024
TRIM71	0.735576	3.34026e-18	2.96358e-17	8.70559
LRRC8C-DT	1.19376	3.52959e-18	3.13035e-17	8.6998
LINGO1	0.16829	3.98944e-18	3.5341e-17	8.68516
ATP10D	0.563809	4.0495e-18	3.58454e-17	8.6835
RAB7B	2.27574	4.2324e-18	3.74356e-17	8.6807
AIF1L	0.644168	4.17271e-18	3.69218e-17	8.6801
ENSG00000306891	2.06987	4.48387e-18	3.96446e-17	8.67398
ST8SIA5	0.426508	4.62234e-18	4.08532e-17	8.66833
ATP8B1-AS1	0.408982	4.74144e-18	4.18897e-17	8.66543
DDX17	0.208081	4.84409e-18	4.27802e-17	8.663
SMC6	0.326371	4.87914e-18	4.30732e-17	8.66215
LINC03006	0.354275	5.24851e-18	4.62984e-17	8.65381
SLC22A17	0.496322	5.25756e-18	4.63604e-17	8.65366
CNTNAP4	0.337013	5.37886e-18	4.74119e-17	8.651
ENSG00000290888	0.708793	5.52802e-18	4.86707e-17	8.64807
C5orf15	0.683838	5.55181e-18	4.88614e-17	8.64754
DNAH14	0.323858	5.99388e-18	5.27319e-17	8.6386
KLHL42	0.448233	6.13459e-18	5.39492e-17	8.63598
RPRD2	0.224008	6.14682e-18	5.40361e-17	8.63573
SMAD5	0.472406	6.24838e-18	5.49079e-17	8.63387
ZNF618	0.292557	6.64641e-18	5.8361e-17	8.62676
JAK2	0.318987	6.82568e-18	5.99123e-17	8.6237
WDR17	0.284969	7.4608e-18	6.5437e-17	8.61348
ENSG00000214776	1.1014	7.69639e-18	6.74777e-17	8.61054
RLF	0.279848	8.60893e-18	7.53634e-17	8.59702
EPM2A	0.329129	8.67077e-18	7.58181e-17	8.5962
LRMDA	0.493875	8.76855e-18	7.6644e-17	8.59494
MAN2A2	0.368356	1.01346e-17	8.84167e-17	8.57823
RNFT1	0.695709	1.08341e-17	9.44112e-17	8.57072
MPHOSPH9	0.293672	1.1531e-17	1.00447e-16	8.56332
ENSG00000308185	0.572595	1.17847e-17	1.02617e-16	8.56088
GDPD1	0.318342	1.18986e-17	1.0357e-16	8.55969
DDX46	0.247641	1.19929e-17	1.04352e-16	8.55879
LINC01948	1.90709	1.32245e-17	1.15024e-16	8.54927
LCORL	0.211376	1.33593e-17	1.16152e-16	8.54633
WEE1	0.717387	1.34404e-17	1.16814e-16	8.54575
KCNB1	0.340349	1.35984e-17	1.18142e-16	8.54424
XRN1	0.238338	1.43176e-17	1.24343e-16	8.53828
FBLN2	1.33874	1.44705e-17	1.25624e-16	8.53792
ARID4A	0.258331	1.44982e-17	1.25817e-16	8.53682
ZNF518A	0.265479	1.5136e-17	1.31302e-16	8.53183
CYP20A1	0.436703	1.64054e-17	1.4226e-16	8.5225
ZCCHC2	0.485604	1.67794e-17	1.45449e-16	8.5199
CCDC91	0.255618	1.6902e-17	1.46401e-16	8.51902
ATM	0.252673	1.70422e-17	1.4756e-16	8.51806
GEN1	0.608708	1.733e-17	1.49939e-16	8.51623
PAN2	0.506866	1.84797e-17	1.59766e-16	8.5087
ENSG00000295554	0.380779	1.90893e-17	1.64975e-16	8.50488
CHRM3-AS2	1.61073	1.93105e-17	1.66781e-16	8.50482
SPNS2	0.47738	1.9576e-17	1.6899e-16	8.50199
USP40	0.390659	2.06383e-17	1.78027e-16	8.4958
ENSG00000266268	1.10042	2.13689e-17	1.84053e-16	8.4923
CEP350	0.239704	2.23032e-17	1.92028e-16	8.48677
AMMECR1	0.482799	2.25576e-17	1.94146e-16	8.48548
GATAD2A	0.335364	2.29444e-17	1.97401e-16	8.48345
POT1	0.425998	2.31062e-17	1.98718e-16	8.48266
ARHGEF28	0.540842	2.42107e-17	2.08062e-16	8.47723
IL10RB	0.562452	2.45309e-17	2.10656e-16	8.47574
ENSG00000268081	0.472787	2.53252e-17	2.17396e-16	8.47197
ADAM23	0.241699	2.62834e-17	2.25537e-16	8.4676
DDR1	0.452966	2.70836e-17	2.32317e-16	8.46412
MYO15B	0.373421	2.71476e-17	2.32779e-16	8.46382
NAA38	0.514965	2.7172e-17	2.32902e-16	8.46375
KMT2D	0.298908	2.7895e-17	2.38831e-16	8.46064
RAP2C-AS1	0.610504	2.87415e-17	2.45896e-16	8.45726
THSD4	0.454162	2.95457e-17	2.52588e-16	8.45393
ENSG00000284977	1.47416	2.99247e-17	2.55733e-16	8.45357
PPARA	0.466662	3.38338e-17	2.88925e-16	8.43807
SPPL2B	0.386514	3.79303e-17	3.23547e-16	8.42465
KHDC1	0.498511	3.83181e-17	3.26734e-16	8.4235
MPPE1	0.627386	4.09724e-17	3.49237e-16	8.4157
RNF103-CHMP3	0.528917	4.10183e-17	3.49499e-16	8.41552
SPICE1	0.54588	4.1073e-17	3.49835e-16	8.41534
RAB7A	0.260015	4.24236e-17	3.61205e-16	8.41149
STX4	0.74849	4.39983e-17	3.7443e-16	8.40741
TPTE2P1	0.782732	4.49082e-17	3.81936e-16	8.40502
ZNF197	0.303944	4.51081e-17	3.83494e-16	8.40427
IPO9	0.257901	4.57626e-17	3.88914e-16	8.40258
HSDL2-AS1	0.580297	4.60064e-17	3.90842e-16	8.40202
PCP4	0.96763	4.7358e-17	4.02176e-16	8.39889
SENP6	0.222912	4.79379e-17	4.0695e-16	8.39712
[truncated: 21,010 more rows]

## Sheet: MG
gene	logfoldchange	pval	pval_adj	score
[truncated: 22,997 more rows]

[truncated: 1 more sheets: Endo-Peri]
