# Supplementary material
Source: Research Square preprint supplement (doi:10.21203/rs.3.rs-9011993/v1)
Supplement: Supplementary file 4 [file 568b026006079f73edcf6dc4.docx]

**Cameron et al_Supplementary Figures**

**Supplementary Figure 1. Uniform Manifold Approximation and Projections (UMAP) for 16 subpopulations of Glu-UL, GLU-DL, GABA and NPC. Nuclei annotated as Glu-UL, GLU-DL, GABA and NPC** were individually subclustered based on transcriptional similarity using a k-nearest neighbor graph constructed in PCA space, followed by Leiden community detection and visualized in two-dimensional space via UMAP in Scanpy 1. A) Upper layer glutamatergic neuron (Glu-UL) ‘level 2’ subpopulations. B) Deep layer glutamatergic neuron (Glu-DL) ‘level 2’ subpopulations. C) Neural progenitor cell (NPC) ‘level 2’ subpopulations. D) GABAergic neurons (GABA) ‘level 2’ subpopulations. Three NPC subclusters (NPC-3, NPC-4 and NPC-5) and the GABA-3 inhibitory neuron subcluster were not taken forward for eQTL mapping as they were not adequately represented across samples.

Reference

1. Wolf, F. A., Angerer, P., & Theis, F. J. (2018). SCANPY: large-scale single-cell gene expression data analysis. *Genome biology*, *19*(1), 15.

**Supplementary Figure 2. Optimization of gene expression principal components (PCs) for eQTL discovery.** A) Number of eGenes (FDR < 0.05) identified in broad ‘level 1’ cell populations across 10–50 expression PCs. B) Number of eGenes (FDR < 0.05) in ‘level 2’ subpopulations of GABA, Glu-DL, Glu-UL, and NPC across 10–50 expression PCs. The optimal number of expression PCs per cell population (marked by peak eGene discovery) was selected for downstream cis-eQTL analyses. Glu-UL = upper layer glutamatergic neurons; Glu-DL = deep layer glutamatergic neurons; NPC = neural progenitor cells; GABA = GABAergic neurons; Endo-Peri = endothelial cells / pericytes; OPC = oligodendrocyte precursor cells; MG = microglia.

**Supplementary Figure 3. Scree plot of Principal Component Analysis (PCA) for genotype data.** Percentage of total genetic variance explained by the first ten principal components (PCs) derived from linkage disequilibrium (LD) pruned SNPs. The first four PCs were identified as capturing the majority of the genetic variance, after which the eigenvalues plateau.
