# Supplementary material
Source: Research Square preprint supplement (doi:10.21203/rs.3.rs-9011993/v1)
Supplement: Supplementary file 5 [file d924dcc1cce0dbb2a8367d48.xlsx]

## Sheet: Schizophrenia
Cell Type	Ensembl ID	Gene symbol	SNP	Chr	topSNP_bp	A1 (ALT)	A2 (REF)	Freq of A1	b_GWAS	se_GWAS	p_GWAS	b_eQTL	se_eQTL	p_eQTL	Beta (SMR)	SE (SMR)	P (SMR)	P (HEIDI)	NSNP HEIDI
Glu-UL	ENSG00000162753	SLC9C2	rs61826818	1	173743683	T	G	0.106339	-0.0720043	0.0136	1.14e-07	0.55889	0.0650694	8.76276e-18	-0.128835	0.0285855	6.57558e-06	0.48266	20
Glu-DL	ENSG00000162753	SLC9C2	rs114672592	1	173829600	T	C	0.120654	-0.065104	0.013	5.803e-07	0.505474	0.0624962	6.06143e-16	-0.128798	0.0302494	2.06384e-05	0.589448	20
Glu-DL	ENSG00000183831	ANKRD45	rs114672592	1	173829600	T	C	0.120654	-0.065104	0.013	5.803e-07	0.359035	0.0448743	1.23516e-15	-0.181331	0.0427163	2.18593e-05	0.243745	17
GABA	ENSG00000183831	ANKRD45	rs61826818	1	173743683	T	G	0.106339	-0.0720043	0.0136	1.14e-07	0.368965	0.0575514	1.44528e-10	-0.195152	0.0478043	4.45883e-05	0.327895	20
NPC	ENSG00000285184	NA	rs113897387	1	150113844	A	G	0.165644	-0.0666956	0.0119	1.821e-08	-0.432868	0.0443981	1.85015e-22	0.154078	0.0317097	1.17963e-06	0.0758256	20
GABA	ENSG00000285184	NA	rs72694957	1	150163093	T	C	0.164622	-0.067696	0.012	1.941e-08	-0.324952	0.0430964	4.69538e-14	0.208326	0.0461202	6.27162e-06	0.145894	20
Glu-UL	ENSG00000296616	NA	rs10798295	1	173714815	T	C	0.362986	-0.0435957	0.0089	1.089e-06	0.398033	0.0478106	8.41746e-17	-0.109528	0.0259432	2.42332e-05	0.135957	20
Glu-DL	ENSG00000296616	NA	rs7544605	1	173814355	C	T	0.362986	-0.0437968	0.009	1.04e-06	0.488822	0.0689092	1.30558e-12	-0.0895966	0.0223274	5.99909e-05	0.0167195	20
GABA	ENSG00000296616	NA	rs7544605	1	173814355	C	T	0.362986	-0.0437968	0.009	1.04e-06	0.48833	0.0534758	6.73746e-20	-0.0896869	0.0208837	1.75024e-05	0.0624258	20
Glu-UL	ENSG00000170802	FOXN2	rs79073127	2	48346756	C	G	0.124744	-0.073204	0.0139	1.545e-07	0.411971	0.0375608	5.4394e-28	-0.177692	0.0374282	2.05898e-06	0.403144	20
NPC	ENSG00000170802	FOXN2	rs79073127	2	48346756	C	G	0.124744	-0.073204	0.0139	1.545e-07	0.377394	0.0454448	1.00285e-16	-0.193972	0.0436136	8.68653e-06	0.695422	20
OPC	ENSG00000170802	FOXN2	rs79073127	2	48346756	C	G	0.124744	-0.073204	0.0139	1.545e-07	0.59115	0.100755	4.43205e-09	-0.123833	0.0315966	8.88472e-05	0.104866	20
GABA	ENSG00000290727	ALMS1P1	rs11893881	2	73597246	A	T	0.210634	0.0570996	0.0102	2.418e-08	0.33565	0.046402	4.7062e-13	0.170117	0.0384261	9.55052e-06	0.731149	20
GABA	ENSG00000055955	ITIH4	rs2710331	3	52803839	C	T	0.386503	-0.0537967	0.009	2.63e-09	0.284163	0.0511381	2.74803e-08	-0.189316	0.0465171	4.7049e-05	0.041707	20
Glu-DL	ENSG00000198315	ZKSCAN8	rs35257859	6	28594812	A	G	0.155419	-0.115799	0.0111	1.756e-25	0.181823	0.0297317	9.62754e-10	-0.636877	0.120716	1.32171e-07	0.274829	20
NPC	ENSG00000310474	NA	rs9261259	6	30055302	C	T	0.135992	-0.1028	0.0123	6.165e-17	0.514201	0.0799026	1.23191e-10	-0.199922	0.0392085	3.41553e-07	0.236361	20
NPC	ENSG00000188938	FAM120AOS	rs6479483	9	93441746	A	G	0.104294	0.0564963	0.0124	5.026e-06	0.320545	0.0402287	1.61167e-15	0.176251	0.0445616	7.64662e-05	0.639651	20
Glu-UL	ENSG00000138175	ARL3	rs10883766	10	102705006	A	G	0.105317	-0.101997	0.0152	1.984e-11	0.187594	0.0285572	5.06409e-11	-0.543713	0.115827	2.67693e-06	0.0179389	20
NPC	ENSG00000214435	AS3MT	rs11191424	10	102866129	A	G	0.351738	-0.0654974	0.0091	4.806e-13	-0.345303	0.0393283	1.63462e-18	0.189681	0.0340769	2.60269e-08	0.195891	20
OPC	ENSG00000080854	IGSF9B	rs12366213	11	133983770	A	G	0.254601	0.053	0.0096	3.661e-08	-0.293025	0.0455782	1.28396e-10	-0.180872	0.0431836	2.80878e-05	0.974334	14
Glu-UL	ENSG00000120451	SNX19	rs3751034	11	130915409	C	T	0.204499	0.050704	0.0107	1.975e-06	0.270304	0.0255659	3.98213e-26	0.187581	0.0433791	1.53064e-05	0.913434	20
Glu-DL	ENSG00000120451	SNX19	rs73022874	11	130861542	T	C	0.242331	0.057502	0.0108	1e-07	0.24878	0.0367528	1.2967e-11	0.231136	0.0552319	2.85375e-05	0.988232	20
NPC	ENSG00000120451	SNX19	rs3751034	11	130915409	C	T	0.204499	0.050704	0.0107	1.975e-06	0.419193	0.0389294	4.87289e-27	0.120956	0.0278876	1.44255e-05	0.0918958	20
GABA	ENSG00000120451	SNX19	rs3751034	11	130915409	C	T	0.204499	0.050704	0.0107	1.975e-06	0.301948	0.0333659	1.43491e-19	0.167923	0.0400009	2.69303e-05	0.726711	20
Glu-UL	ENSG00000136144	RCBTB1	rs9316463	13	49602708	G	A	0.413088	0.0407964	0.0088	3.934e-06	0.217152	0.0249185	2.92097e-18	0.18787	0.0459022	4.2612e-05	0.355341	20
Glu-UL	ENSG00000120071	KANSL1	rs62063276	17	45959042	G	T	0.242331	-0.0611045	0.0109	1.889e-08	0.608738	0.0475138	1.40793e-37	-0.100379	0.019545	2.80957e-07	0.999835	20
Glu-DL	ENSG00000120071	KANSL1	rs62063276	17	45959042	G	T	0.242331	-0.0611045	0.0109	1.889e-08	0.621475	0.0425288	2.3195e-48	-0.0983218	0.0187852	1.65886e-07	0.999999	20
NPC	ENSG00000120071	KANSL1	rs56180212	17	45883545	G	A	0.242331	-0.0613961	0.0108	1.294e-08	0.585184	0.0488565	4.65451e-33	-0.104918	0.0204289	2.81052e-07	1	20
GABA	ENSG00000120071	KANSL1	rs56040418	17	45880713	T	C	0.139059	-0.061697	0.0108	1.098e-08	0.57463	0.0456287	2.28953e-36	-0.107368	0.020638	1.96674e-07	1	20
Endo-Peri	ENSG00000120071	KANSL1	rs62055937	17	45771602	T	G	0.241309	-0.0624019	0.0108	7.748e-09	0.425234	0.0459025	1.97205e-20	-0.146747	0.0299329	9.46079e-07	0.998668	20
OPC	ENSG00000120071	KANSL1	rs28439143	17	45910357	A	G	0.133947	-0.0611045	0.0108	1.659e-08	0.618413	0.0499521	3.34775e-35	-0.0988085	0.0192014	2.66229e-07	0.999999	20
MG	ENSG00000120071	KANSL1	rs62063276	17	45959042	G	T	0.242331	-0.0611045	0.0109	1.889e-08	0.598412	0.0505235	2.30554e-32	-0.102111	0.0201521	4.04082e-07	0.999885	20
Glu-UL	ENSG00000176681	LRRC37A	rs58879558	17	46018101	C	T	0.251534	-0.0579009	0.0107	6.267e-08	0.917486	0.0681894	2.87885e-41	-0.0631082	0.0125701	5.15413e-07	0.565801	20
Glu-DL	ENSG00000176681	LRRC37A	rs62054804	17	45837443	T	C	0.241309	-0.0613961	0.0107	1.089e-08	0.921886	0.0689501	9.01212e-41	-0.0665984	0.0126303	1.34288e-07	1	20
NPC	ENSG00000176681	LRRC37A	rs12373168	17	45846971	C	A	0.244376	-0.0627964	0.0107	4.817e-09	0.790366	0.0766709	6.44659e-25	-0.0794523	0.0155783	3.39295e-07	1	20
GABA	ENSG00000176681	LRRC37A	rs55929431	17	45922836	A	G	0.241309	-0.0608034	0.0108	2.037e-08	0.889342	0.0804248	2.00397e-28	-0.068369	0.0136271	5.24498e-07	1	20
Endo-Peri	ENSG00000176681	LRRC37A	rs4627402	17	45855375	T	C	0.135992	-0.0622045	0.011	1.369e-08	0.932433	0.147739	2.76615e-10	-0.0667121	0.0158398	2.53495e-05	0.991048	20
GABA	ENSG00000228696	ARL17B	rs56040418	17	45880713	T	C	0.139059	-0.061697	0.0108	1.098e-08	2.22437	0.146805	7.3604e-52	-0.0277368	0.00518893	9.02265e-08	0.99877	20
Endo-Peri	ENSG00000228696	ARL17B	rs70600	17	46782655	T	C	0.139059	-0.0572023	0.011	1.899e-07	2.27499	0.132806	8.83964e-66	-0.025144	0.00505307	6.49181e-07	0.331427	20
MG	ENSG00000228696	ARL17B	rs56180212	17	45883545	G	A	0.242331	-0.0613961	0.0108	1.294e-08	2.4532	0.161316	3.15996e-52	-0.025027	0.00469996	1.00992e-07	1	20
Glu-UL	ENSG00000238083	LRRC37A2	rs58879558	17	46018101	C	T	0.251534	-0.0579009	0.0107	6.267e-08	0.956882	0.0650313	5.22838e-49	-0.06051	0.0119144	3.79943e-07	0.995452	20
Glu-DL	ENSG00000238083	LRRC37A2	rs1819040	17	46142465	A	T	0.193252	-0.0614995	0.0109	1.741e-08	1.06053	0.0739951	1.37146e-46	-0.0579892	0.0110456	1.52095e-07	1	20
NPC	ENSG00000238083	LRRC37A2	rs1819040	17	46142465	A	T	0.193252	-0.0614995	0.0109	1.741e-08	0.85856	0.0824437	2.14276e-25	-0.071631	0.0144393	7.01877e-07	1	20
GABA	ENSG00000238083	LRRC37A2	rs17652520	17	46021601	A	G	0.244376	-0.0603987	0.0109	2.99e-08	0.911052	0.0600991	6.59057e-52	-0.0662956	0.0127384	1.94652e-07	1	20
Endo-Peri	ENSG00000238083	LRRC37A2	rs733967	17	46012324	C	T	0.242331	-0.0614995	0.0109	1.695e-08	0.638302	0.0809733	3.19939e-15	-0.0963486	0.021	4.47439e-06	1	20
OPC	ENSG00000238083	LRRC37A2	rs1819040	17	46142465	A	T	0.193252	-0.0614995	0.0109	1.741e-08	1.03095	0.0998728	5.57009e-25	-0.0596535	0.0120491	7.38816e-07	1	20
MG	ENSG00000238083	LRRC37A2	rs17661015	17	46115591	C	T	0.242331	-0.0619038	0.011	1.875e-08	0.870055	0.121008	6.47723e-13	-0.0711493	0.016055	9.35412e-06	1	20
Glu-UL	ENSG00000285668	NA	rs55974014	17	45680084	A	C	0.132924	-0.0580991	0.011	1.346e-07	1.71367	0.0889055	8.66862e-83	-0.0339032	0.00665558	3.50666e-07	0.616294	20
Glu-DL	ENSG00000285668	NA	rs55974014	17	45680084	A	C	0.132924	-0.0580991	0.011	1.346e-07	1.55788	0.0823564	8.3705e-80	-0.0372937	0.00733095	3.63472e-07	0.66245	20
NPC	ENSG00000285668	NA	rs62054825	17	45852667	A	G	0.144172	-0.0619978	0.0108	8.613e-09	1.58336	0.0929624	4.73591e-65	-0.0391559	0.00719794	5.33186e-08	1	20
GABA	ENSG00000285668	NA	rs55974014	17	45680084	A	C	0.132924	-0.0580991	0.011	1.346e-07	1.47843	0.0847411	3.66313e-68	-0.0392978	0.0077738	4.30035e-07	0.64253	20
Endo-Peri	ENSG00000285668	NA	rs17649553	17	45917282	T	C	0.241309	-0.061001	0.0108	1.742e-08	1.12559	0.134468	5.72725e-17	-0.0541945	0.011575	2.84017e-06	0.978204	20
OPC	ENSG00000285668	NA	rs112950348	17	45955822	A	G	0.241309	-0.0613961	0.011	2.489e-08	1.20148	0.133359	2.07292e-19	-0.0511006	0.01077	2.08793e-06	1	20
MG	ENSG00000285668	NA	rs62055937	17	45771602	T	G	0.241309	-0.0624019	0.0108	7.748e-09	1.29025	0.15494	8.26132e-17	-0.048364	0.010188	2.06283e-06	0.999266	20
Glu-UL	ENSG00000291175	NA	rs2435204	17	45910839	G	A	0.196319	-0.061001	0.0108	1.453e-08	-0.361022	0.0431417	5.84558e-17	0.168967	0.0360916	2.84602e-06	1	20
NPC	ENSG00000291175	NA	rs112275277	17	45904592	T	C	0.241309	-0.061302	0.0108	1.512e-08	-0.510446	0.0420514	6.59101e-34	0.120095	0.0233568	2.72202e-07	1	20
GABA	ENSG00000291175	NA	rs62062288	17	46019187	A	G	0.240286	-0.0676026	0.0112	1.651e-09	-0.438702	0.0507524	5.42962e-18	0.154097	0.0311381	7.46629e-07	0.989053	20
OPC	ENSG00000291175	NA	rs62062288	17	46019187	A	G	0.240286	-0.0676026	0.0112	1.651e-09	-0.399512	0.0705331	1.47731e-08	0.169213	0.0409681	3.62199e-05	0.0168851	20
Glu-UL	ENSG00000305133	NA	rs199447	17	46734822	T	C	0.131902	-0.0575989	0.0109	1.437e-07	3.91034	0.184794	2.20848e-99	-0.0147299	0.00287309	2.94617e-07	0.20983	20
Glu-DL	ENSG00000305133	NA	rs28439143	17	45910357	A	G	0.133947	-0.0611045	0.0108	1.659e-08	3.89507	0.168758	7.20879e-118	-0.0156876	0.00285482	3.90414e-08	0.960928	20
NPC	ENSG00000305133	NA	rs17769552	17	45849924	A	G	0.237219	-0.0625991	0.0108	7.708e-09	4.18506	0.206615	3.1868e-91	-0.0149577	0.00268419	2.51044e-08	0.999709	20
GABA	ENSG00000305133	NA	rs17769552	17	45849924	A	G	0.237219	-0.0625991	0.0108	7.708e-09	3.77638	0.201716	3.321e-78	-0.0165765	0.00299381	3.0785e-08	0.979513	20
Endo-Peri	ENSG00000305133	NA	rs199447	17	46734822	T	C	0.131902	-0.0575989	0.0109	1.437e-07	3.40411	0.257218	5.55732e-40	-0.0169204	0.00344782	9.22174e-07	0.0263065	20
OPC	ENSG00000305133	NA	rs28439143	17	45910357	A	G	0.133947	-0.0611045	0.0108	1.659e-08	4.20628	0.25265	3.09308e-62	-0.014527	0.0027118	8.46426e-08	1	20
MG	ENSG00000305133	NA	rs199447	17	46734822	T	C	0.131902	-0.0575989	0.0109	1.437e-07	4.4005	0.266576	3.24127e-61	-0.0130892	0.00260081	4.83547e-07	0.223339	20
Glu-UL	ENSG00000305150	NA	rs199447	17	46734822	T	C	0.131902	-0.0575989	0.0109	1.437e-07	1.27914	0.107981	2.25751e-32	-0.0450293	0.00933072	1.39361e-06	0.430768	20
Glu-DL	ENSG00000305150	NA	rs62061733	17	45941033	G	A	0.241309	-0.061302	0.0108	1.566e-08	0.954432	0.106347	2.84214e-19	-0.0642288	0.0133889	1.60914e-06	1	20
NPC	ENSG00000305150	NA	rs199447	17	46734822	T	C	0.131902	-0.0575989	0.0109	1.437e-07	1.50628	0.107532	1.39836e-44	-0.0382392	0.00773416	7.64602e-07	0.705779	20
GABA	ENSG00000305150	NA	rs112415880	17	45965502	A	G	0.242331	-0.0608975	0.0109	2.05e-08	1.13983	0.118518	6.75133e-22	-0.0534266	0.0110593	1.3589e-06	0.995543	20
Endo-Peri	ENSG00000305150	NA	rs199447	17	46734822	T	C	0.131902	-0.0575989	0.0109	1.437e-07	1.05185	0.149123	1.7434e-12	-0.0547594	0.0129481	2.34586e-05	0.0947265	20
OPC	ENSG00000305150	NA	rs199447	17	46734822	T	C	0.131902	-0.0575989	0.0109	1.437e-07	1.26515	0.15919	1.90517e-15	-0.0455275	0.0103463	1.08069e-05	0.182199	20
MG	ENSG00000305150	NA	rs4627402	17	45855375	T	C	0.135992	-0.0622045	0.011	1.369e-08	1.17935	0.185761	2.17089e-10	-0.0527449	0.0124907	2.4137e-05	0.341578	20
Glu-UL	ENSG00000305169	NA	rs199528	17	46765770	T	C	0.143149	-0.0575989	0.011	1.571e-07	1.26088	0.0818338	1.45062e-53	-0.0456816	0.0092141	7.13011e-07	0.635967	20
Glu-DL	ENSG00000305169	NA	rs7210219	17	45941153	C	T	0.245399	-0.0605023	0.0111	4.98e-08	1.06063	0.0962551	3.09792e-28	-0.057044	0.0116759	1.03115e-06	0.976976	20
NPC	ENSG00000305169	NA	rs199528	17	46765770	T	C	0.143149	-0.0575989	0.011	1.571e-07	1.81519	0.132975	2.00157e-42	-0.0317316	0.00649051	1.01391e-06	0.765956	20
GABA	ENSG00000305169	NA	rs112415880	17	45965502	A	G	0.242331	-0.0608975	0.0109	2.05e-08	1.15532	0.100357	1.14668e-30	-0.0527105	0.010487	5.00072e-07	0.986122	20
Endo-Peri	ENSG00000305169	NA	rs62063276	17	45959042	G	T	0.242331	-0.0611045	0.0109	1.889e-08	1.29359	0.142662	1.21752e-19	-0.0472362	0.00990643	1.85846e-06	0.964114	20
OPC	ENSG00000305169	NA	rs733967	17	46012324	C	T	0.242331	-0.0614995	0.0109	1.695e-08	1.79999	0.176885	2.53549e-24	-0.0341665	0.00692409	8.03807e-07	0.999897	20
MG	ENSG00000305169	NA	rs199533	17	46751565	A	G	0.131902	-0.0575989	0.0109	1.363e-07	1.36629	0.178386	1.87159e-14	-0.0421572	0.00969233	1.36423e-05	0.198735	20
Glu-UL	ENSG00000267127	NA	rs9961321	18	80067563	A	G	0.389571	0.0423961	0.0091	3.352e-06	-0.303892	0.0307838	5.51541e-23	-0.13951	0.0331121	2.51696e-05	0.999458	20
NPC	ENSG00000267127	NA	rs9961321	18	80067563	A	G	0.389571	0.0423961	0.0091	3.352e-06	-0.395982	0.0317167	9.01733e-36	-0.107066	0.0245287	1.27176e-05	0.998651	20
Endo-Peri	ENSG00000267127	NA	rs11661922	18	80010278	C	A	0.345603	0.0440982	0.0091	1.124e-06	-0.296103	0.0516712	1.00125e-08	-0.148929	0.040248	0.000215367	0.992701	20
Glu-UL	ENSG00000294647	NA	rs56330647	19	19516844	G	A	0.175869	0.0582967	0.0114	2.954e-07	0.929152	0.067062	1.18481e-43	0.0627419	0.0130783	1.6073e-06	0.8071	20
Glu-DL	ENSG00000294647	NA	rs113980591	19	19454548	A	G	0.091002	0.0586996	0.0114	2.36e-07	0.831692	0.0951998	2.40901e-18	0.0705785	0.0159106	9.16744e-06	0.835603	20
Glu-DL	ENSG00000286100	NA	rs6031847	20	44885562	T	C	0.168712	-0.042197	0.0097	1.48e-05	-1.08499	0.0813463	1.39328e-40	0.0388916	0.00940368	3.53736e-05	0.0672537	20
GABA	ENSG00000286100	NA	rs6031847	20	44885562	T	C	0.168712	-0.042197	0.0097	1.48e-05	-0.919499	0.0743366	3.82707e-35	0.0458913	0.0111826	4.06402e-05	0.0795127	20

## Sheet: Bipolar disorder
Cell Type	Ensembl ID	Gene symbol	SNP	Chr	topSNP_bp	A1 (ALT)	A2 (REF)	Freq of A1	b_GWAS	se_GWAS	p_GWAS	b_eQTL	se_eQTL	p_eQTL	Beta (SMR)	SE (SMR)	P (SMR)	P (HEIDI)	NSNP HEIDI
NPC	ENSG00000214435	AS3MT	rs11191424	10	102866129	A	G	0.351738	-0.0361005	0.0077	3.123e-06	-0.345303	0.0393283	1.63462e-18	0.104547	0.0252793	3.539e-05	0.904008	20
NPC	ENSG00000285942	NA	rs111625883	15	42573458	A	C	0.206544	0.0601004	0.0127	2.311e-06	-0.468232	0.056832	1.73846e-16	-0.128356	0.0312792	4.06848e-05	0.980954	20

## Sheet: Major depressive disorder
Cell Type	Ensembl ID	Gene symbol	SNP	Chr	topSNP_bp	A1 (ALT)	A2 (REF)	Freq of A1	b_GWAS	se_GWAS	p_GWAS	b_eQTL	se_eQTL	p_eQTL	Beta (SMR)	SE (SMR)	P (SMR)	P (HEIDI)	NSNP HEIDI
NPC	ENSG00000188938	FAM120AOS	rs6479483	9	93441746	A	G	0.104294	0.0230034	0.0044	1.484e-07	0.320545	0.0402287	1.61167e-15	0.0717634	0.0164175	1.23595e-05	0.268659	20
OPC	ENSG00000080854	IGSF9B	rs12366213	11	133983770	A	G	0.254601	0.0165031	0.0035	1.907e-06	-0.293025	0.0455782	1.28396e-10	-0.0563197	0.0148124	0.000143423	0.351817	14
MG	ENSG00000228696	ARL17B	rs56180212	17	45883545	G	A	0.242331	0.0154008	0.0039	7.512e-05	2.4532	0.161316	3.15996e-52	0.00627785	0.00164249	0.000132287	0.770472	20
Endo-Peri	ENSG00000120071	KANSL1	rs62055937	17	45771602	T	G	0.241309	0.0158044	0.0039	5.158e-05	0.425234	0.0459025	1.97205e-20	0.0371664	0.0100105	0.000205042	0.693419	20
OPC	ENSG00000120071	KANSL1	rs28439143	17	45910357	A	G	0.133947	0.0154008	0.0039	7.102e-05	0.618413	0.0499521	3.34775e-35	0.0249037	0.00661951	0.000168445	0.305195	20
MG	ENSG00000120071	KANSL1	rs62063276	17	45959042	G	T	0.242331	0.0165031	0.004	3.042e-05	0.598412	0.0505235	2.30554e-32	0.0275782	0.00707829	9.77283e-05	0.766499	20
Glu-DL	ENSG00000238083	LRRC37A2	rs1819040	17	46142465	A	T	0.193252	0.0189984	0.0042	4.809e-06	1.06053	0.0739951	1.37146e-46	0.017914	0.00415283	1.60553e-05	0.348447	20
NPC	ENSG00000238083	LRRC37A2	rs1819040	17	46142465	A	T	0.193252	0.0189984	0.0042	4.809e-06	0.85856	0.0824437	2.14276e-25	0.0221282	0.00533347	3.34026e-05	0.369309	20
Endo-Peri	ENSG00000238083	LRRC37A2	rs733967	17	46012324	C	T	0.242331	0.0194987	0.004	1.05e-06	0.638302	0.0809733	3.19939e-15	0.0305478	0.00736803	3.38349e-05	0.432467	20
OPC	ENSG00000238083	LRRC37A2	rs1819040	17	46142465	A	T	0.193252	0.0189984	0.0042	4.809e-06	1.03095	0.0998728	5.57009e-25	0.0184281	0.00444791	3.42648e-05	0.380257	20
MG	ENSG00000238083	LRRC37A2	rs17661015	17	46115591	C	T	0.242331	0.0159029	0.004	6.1e-05	0.870055	0.121008	6.47723e-13	0.018278	0.00525344	0.000502815	0.999909	20
Endo-Peri	ENSG00000285668	NA	rs17649553	17	45917282	T	C	0.241309	0.0156962	0.0039	5.045e-05	1.12559	0.134468	5.72725e-17	0.0139448	0.00384452	0.00028652	0.733108	20
Endo-Peri	ENSG00000305169	NA	rs62063276	17	45959042	G	T	0.242331	0.0165031	0.004	3.042e-05	1.29359	0.142662	1.21752e-19	0.0127576	0.0033972	0.000173123	0.553047	20
OPC	ENSG00000285668	NA	rs112950348	17	45955822	A	G	0.241309	0.0159029	0.0039	4.878e-05	1.20148	0.133359	2.07292e-19	0.0132361	0.003563	0.000203298	0.939462	20
OPC	ENSG00000305133	NA	rs28439143	17	45910357	A	G	0.133947	0.0154008	0.0039	7.102e-05	4.20628	0.25265	3.09308e-62	0.00366138	0.000952909	0.000121878	0.647246	20
OPC	ENSG00000305169	NA	rs733967	17	46012324	C	T	0.242331	0.0194987	0.004	1.05e-06	1.79999	0.176885	2.53549e-24	0.0108326	0.00246404	1.10117e-05	0.647194	20
MG	ENSG00000285668	NA	rs62055937	17	45771602	T	G	0.241309	0.0158044	0.0039	5.158e-05	1.29025	0.15494	8.26132e-17	0.0122491	0.00336156	0.000268581	0.9678	20
MG	ENSG00000305150	NA	rs4627402	17	45855375	T	C	0.135992	0.0161981	0.0039	4.054e-05	1.17935	0.185761	2.17089e-10	0.0137348	0.0039517	0.000509583	0.0907502	20
NPC	ENSG00000183066	WBP2NL	rs9607869	22	42022106	A	T	0.126789	-0.017604	0.0035	5.034e-07	-0.344119	0.0507564	1.20334e-11	0.0511568	0.0126642	5.35683e-05	0.12146	20

## Sheet: Obsessive-compulsive disorder 
Cell Type	Ensembl ID	Gene symbol	SNP	Chr	topSNP_bp	A1 (ALT)	A2 (REF)	Freq of A1	b_GWAS	se_GWAS	p_GWAS	b_eQTL	se_eQTL	p_eQTL	Beta (SMR)	SE (SMR)	P (SMR)	P (HEIDI)	NSNP HEIDI
Glu-DL	ENSG00000286100	NA	rs6031847	20	44885562	T	C	0.168712	-0.0563047	0.012	2.771e-06	-1.08499	0.0813463	1.39328e-40	0.0518943	0.0117244	9.592e-06	0.0525699	20
GABA	ENSG00000286100	NA	rs6031847	20	44885562	T	C	0.168712	-0.0563047	0.012	2.771e-06	-0.919499	0.0743366	3.82707e-35	0.0612341	0.013958	1.14905e-05	0.0645304	20
