# Supplementary material
Source: Research Square preprint supplement (doi:10.21203/rs.3.rs-9011993/v1)
Supplement: Supplementary file 6 [file f338ec960d3c2a09bfcc7612.xlsx]

## Sheet: Column information
Column	Description
Cell_type	Cell population
Ensembl_id	Ensembl ID for eGene
symbol	Official symbol for eGene
CHROM	Chromosome on which eQTL located
SNP	rsID for SNP with smallest p-value for eGene ('top SNP')
POS	Base position of top SNP (hg38)
REF	Reference allele of SNP
ALT	Alternate allele of SNP
af	In-sample ALT allele frequency
slope	Regression slope
slope_se	Standard error of the regression slope
pval_nominal	Nominal p-value of the association between the phenotype and variant
pval_beta	Beta-approximated empirical p-value
qval	Storey q-value corresponding to pval_beta
In_Peak	True = top SNP within an open chromatin region identified in the prenatal cerebral cortex by Ziffra et al (PMID: 34616060)

## Sheet: Glu-UL
cell_type	ensembl_id	symbol	CHROM	SNP	POS	REF	ALT	AF	slope	slope_se	pval_nominal	pval_beta	qval	In_Peak
Glu-UL	ENSG00000272438		1	rs4970383	903175	C	A	0.261194	-0.404787	0.0558023	2.90878e-10	6.61692e-07	1.33169e-05	FALSE
Glu-UL	ENSG00000187608	ISG15	1	rs116904365	1000291	C	G	0.201493	-0.272591	0.0494583	4.67701e-07	0.000501495	0.0045569	TRUE
Glu-UL	ENSG00000127054	INTS11	1	rs4074137	1091327	C	A	0.559702	-0.120364	0.0262186	1.71533e-05	0.00911099	0.0480706	FALSE
Glu-UL	ENSG00000268575		1	rs34306661	1756186	T	C	0.488806	0.206222	0.0427757	7.16364e-06	0.00478546	0.0288058	FALSE
Glu-UL	ENSG00000290854		1	rs2076327	1755523	C	T	0.552239	0.218543	0.0444786	5.01728e-06	0.00346362	0.0224889	FALSE
Glu-UL	ENSG00000067606	PRKCZ	1	rs34415348	2132990	A	C	0.0858209	0.12629	0.0201964	2.15854e-08	3.06848e-05	0.000410628	TRUE
Glu-UL	ENSG00000149527	PLCH2	1	rs34672163	2455439	G	A	0.104478	-0.233626	0.0457326	2.34299e-06	0.00182449	0.0133239	FALSE
Glu-UL	ENSG00000142606	MMEL1	1	rs6657596	2786542	T	G	0.335821	0.256272	0.045175	2.42197e-07	0.000262926	0.00266659	TRUE
Glu-UL	ENSG00000116198	CEP104	1	rs7534819	3844106	C	G	0.276119	-0.131288	0.0159878	4.32726e-12	3.0708e-08	8.46048e-07	FALSE
Glu-UL	ENSG00000130939	UBE4B	1	rs35316894	10143930	T	C	0.190299	-0.0969381	0.0156146	2.60982e-08	3.13347e-05	0.00041662	FALSE
Glu-UL	ENSG00000284646		1	rs2993663	11339099	C	A	0.529851	-0.42022	0.0549185	5.09763e-11	1.31948e-07	3.10581e-06	FALSE
Glu-UL	ENSG00000299102		1	rs12143403	11460334	T	C	0.223881	-0.401507	0.0630582	1.33083e-08	1.69048e-05	0.000239932	FALSE
Glu-UL	ENSG00000177000	MTHFR	1	rs1801131	11794419	T	G	0.350746	0.139908	0.0239379	1.19344e-07	0.000153586	0.0016872	FALSE
Glu-UL	ENSG00000142632	ARHGEF19	1	rs75909377	16044217	T	C	0.0932836	-0.383775	0.0768201	3.64422e-06	0.00222519	0.0157155	FALSE
Glu-UL	ENSG00000037637	FBXO42	1	rs4661727	16242118	T	C	0.399254	-0.0794791	0.012164	6.53896e-09	8.37721e-06	0.000127129	FALSE
Glu-UL	ENSG00000291072		1	rs279024	16460433	G	A	0.69403	0.211706	0.0426931	4.20812e-06	0.00165629	0.0122782	FALSE
Glu-UL	ENSG00000291072		1	rs279024	16460433	G	A	0.69403	0.211706	0.0426931	4.20812e-06	0.00165629	0.0122782	FALSE
Glu-UL	ENSG00000291072		1	rs279024	16460433	G	A	0.69403	0.211706	0.0426931	4.20812e-06	0.00165629	0.0122782	FALSE
Glu-UL	ENSG00000291072		1	rs279024	16460433	G	A	0.69403	0.211706	0.0426931	4.20812e-06	0.00165629	0.0122782	FALSE
Glu-UL	ENSG00000291072		1	rs279024	16460433	G	A	0.69403	0.211706	0.0426931	4.20812e-06	0.00165629	0.0122782	FALSE
Glu-UL	ENSG00000058453	CROCC	1	rs2761504	16676720	C	G	0.279851	-0.209765	0.0370647	2.55932e-07	0.000158578	0.00173279	FALSE
Glu-UL	ENSG00000009709	PAX7	1	rs9439668	18529480	A	G	0.0559702	0.841831	0.159894	1.26106e-06	0.0053142	0.0312192	FALSE
Glu-UL	ENSG00000142794	NBPF3	1	rs1566523	21440170	G	C	0.481343	-0.264528	0.0251355	1.70744e-16	3.5974e-12	2.13037e-10	TRUE
Glu-UL	ENSG00000142798	HSPG2	1	rs2077271	21877036	G	A	0.623134	-0.222956	0.0415297	8.32892e-07	0.00109826	0.00867182	FALSE
Glu-UL	ENSG00000001461	NIPAL3	1	rs525500	24386488	G	A	0.686567	-0.252037	0.036741	1.61097e-09	3.98841e-06	6.59671e-05	TRUE
Glu-UL	ENSG00000001460	STPG1	1	rs2477303	24385859	T	A	0.227612	-0.468929	0.0572187	4.65092e-12	3.06873e-08	8.46048e-07	TRUE
Glu-UL	ENSG00000187010	RHD	1	rs72660908	25257119	C	G	0.33209	-0.27389	0.0512715	9.26859e-07	0.000781007	0.00655883	FALSE
Glu-UL	ENSG00000117616	RSRP1	1	rs55794721	25235176	G	A	0.339552	-0.144114	0.0253953	2.40265e-07	0.000267377	0.00269317	FALSE
Glu-UL	ENSG00000142675	CNKSR1	1	rs12117236	26197016	T	C	0.257463	-0.27073	0.0430511	1.8579e-08	2.25004e-05	0.00030831	FALSE
Glu-UL	ENSG00000117713	ARID1A	1	rs35015532	26425638	A	G	0.231343	0.054509	0.011485	9.5379e-06	0.00437597	0.0270168	FALSE
Glu-UL	ENSG00000158161	EYA3	1	rs34814685	28142650	G	A	0.19403	0.0754603	0.0168631	2.64142e-05	0.00925815	0.0485734	FALSE
Glu-UL	ENSG00000270605		1	rs9508	28237768	A	G	0.335821	-0.424275	0.0591142	4.06427e-10	7.21703e-07	1.444e-05	FALSE
Glu-UL	ENSG00000204138	PHACTR4	1	rs11247776	28342047	T	C	0.339552	-0.0714579	0.00874902	5.25915e-12	2.76616e-08	7.70356e-07	FALSE
Glu-UL	ENSG00000180198	RCC1	1	rs61787581	28790639	A	T	0.130597	0.177794	0.0307614	1.56047e-07	0.00019735	0.00206871	FALSE
Glu-UL	ENSG00000116350	SRSF4	1	rs2376719	29663580	A	G	0.261194	0.0764523	0.0161462	9.95072e-06	0.00592609	0.0342585	FALSE
Glu-UL	ENSG00000184389	A3GALT2	1	rs11554674	33324895	G	A	0.205224	0.73294	0.0555459	2.3882e-21	3.91578e-17	6.72486e-15	FALSE
Glu-UL	ENSG00000146463	ZMYM4	1	rs117430903	34948217	A	C	0.13806	0.0973548	0.0209697	1.41156e-05	0.00452465	0.0276367	FALSE
Glu-UL	ENSG00000163879	DNALI1	1	rs10908354	37549000	A	G	0.231343	0.357338	0.050833	7.72086e-10	1.69672e-06	3.05121e-05	FALSE
Glu-UL	ENSG00000134697	GNL2	1	rs6700965	37570490	A	G	0.395522	-0.120599	0.0238965	2.98644e-06	0.00197757	0.0142399	FALSE
Glu-UL	ENSG00000204084	INPP5B	1	rs12395	37803164	T	C	0.223881	0.121366	0.0232865	1.55733e-06	0.00136472	0.0104089	FALSE
Glu-UL	ENSG00000084070	SMAP2	1	rs3013459	40371015	T	C	0.130597	-0.119104	0.0220057	6.98245e-07	0.000574138	0.00506511	FALSE
Glu-UL	ENSG00000126091	ST3GAL3	1	rs12410155	43722794	A	C	0.287313	-0.0932036	0.0131756	6.36967e-10	1.79018e-06	3.19143e-05	FALSE
Glu-UL	ENSG00000117448	AKR1A1	1	rs518365	45544980	A	G	0.395522	-0.1474	0.0215557	1.76967e-09	1.26644e-06	2.39445e-05	FALSE
Glu-UL	ENSG00000086015	MAST2	1	rs10890347	45776660	T	A	0.294776	0.0654603	0.0147588	3.05659e-05	0.00621852	0.0355195	FALSE
Glu-UL	ENSG00000171357	LURAP1	1	rs28364741	46198577	A	G	0.152985	0.431789	0.0771379	3.29504e-07	0.000179658	0.00192237	TRUE
Glu-UL	ENSG00000186377	CYP4X1	1	rs986034	46761155	T	G	0.309702	0.181716	0.0375178	6.57186e-06	0.00312091	0.0206145	FALSE
Glu-UL	ENSG00000162385	MAGOH	1	rs11590819	53132326	G	A	0.0671642	0.338801	0.0663483	2.36275e-06	0.00209875	0.0149351	FALSE
Glu-UL	ENSG00000157193	LRP8	1	rs1288585	53390605	A	G	0.410448	0.108644	0.0201145	7.30335e-07	0.000547993	0.00489183	TRUE
Glu-UL	ENSG00000243725	TTC4	1	rs57141145	54712745	T	C	0.0671642	0.600244	0.062453	9.08862e-15	1.09927e-10	4.82008e-09	FALSE
Glu-UL	ENSG00000226476	LINC01748	1	rs2447043	60622248	A	G	0.563433	0.225987	0.0432575	1.48279e-06	0.00107061	0.00847965	TRUE
Glu-UL	ENSG00000132849	PATJ	1	rs75696041	61754266	C	T	0.100746	-0.149267	0.0268336	3.79903e-07	0.000508277	0.00460345	FALSE
Glu-UL	ENSG00000306520		1	rs2182868	62714365	G	C	0.134328	0.370168	0.0789733	1.19267e-05	0.00773338	0.0422741	FALSE
Glu-UL	ENSG00000088035	ALG6	1	rs7550087	63492775	A	C	0.291045	-0.12616	0.0232401	6.54294e-07	0.000750668	0.00636108	FALSE
Glu-UL	ENSG00000300414		1	rs12088574	63405242	C	T	0.156716	-0.540135	0.056821	1.44177e-14	1.08221e-10	4.76555e-09	FALSE
Glu-UL	ENSG00000142856	ITGB3BP	1	rs7545044	63390980	A	G	0.723881	-0.338298	0.0232324	1.0878e-23	1.09738e-18	2.82692e-16	FALSE
Glu-UL	ENSG00000116678	LEPR	1	rs9436748	65445989	G	T	0.354478	-0.110869	0.0205947	7.84772e-07	0.000552352	0.00491203	FALSE
Glu-UL	ENSG00000033122	LRRC7	1	rs6699502	69574808	C	T	0.324627	-0.0929821	0.0176935	1.31114e-06	0.000796843	0.00667007	FALSE
Glu-UL	ENSG00000050628	PTGER3	1	rs17090710	70975410	C	G	0.261194	0.702743	0.0658588	9.0794e-17	9.36536e-12	4.97438e-10	FALSE
Glu-UL	ENSG00000254685	FPGT	1	rs11806946	74198025	G	A	0.466418	-0.196667	0.0310107	1.48201e-08	1.43926e-05	0.00020771	TRUE
Glu-UL	ENSG00000116783	TNNI3K	1	rs11210394	73998423	C	T	0.369403	-0.179703	0.0317955	2.63991e-07	0.000199898	0.00209298	TRUE
Glu-UL	ENSG00000162623	TYW3	1	rs1039562	74795149	T	C	0.458955	-0.183627	0.0383821	8.24852e-06	0.00371536	0.0238232	FALSE
Glu-UL	ENSG00000137968	SLC44A5	1	rs1778451	75521316	C	T	0.156716	-0.112553	0.0253195	2.94616e-05	0.00944626	0.0492843	TRUE
Glu-UL	ENSG00000057468	MSH4	1	rs1146632	75786061	T	C	0.544776	0.283419	0.0424776	3.61586e-09	6.60846e-06	0.000101939	TRUE
Glu-UL	ENSG00000289212		1	rs12090648	77256254	T	G	0.145522	-0.330582	0.0687155	7.44742e-06	0.00372304	0.0238576	FALSE
Glu-UL	ENSG00000137960	GIPC2	1	rs11162411	78065661	A	T	0.61194	-0.147808	0.0215659	1.6535e-09	2.35875e-06	4.08489e-05	FALSE
Glu-UL	ENSG00000137965	IFI44	1	rs6678067	78678606	G	C	0.339552	-0.233502	0.0376673	2.71187e-08	4.40295e-05	0.000566405	FALSE
Glu-UL	ENSG00000233008	LINC01725	1	rs11163847	83813787	A	C	0.212687	0.146643	0.0295645	4.18706e-06	0.00290842	0.019562	FALSE
Glu-UL	ENSG00000233008	LINC01725	1	rs11163847	83813787	A	C	0.212687	0.146643	0.0295645	4.18706e-06	0.00290842	0.019562	FALSE
Glu-UL	ENSG00000137941	TTLL7	1	rs35452337	84068820	C	A	0.473881	-0.0694961	0.0132642	1.39622e-06	0.00105126	0.00835987	FALSE
Glu-UL	ENSG00000122432	SPATA1	1	rs17109982	84469150	T	C	0.179104	-0.533808	0.0702232	6.35167e-11	1.53948e-07	3.5488e-06	FALSE
Glu-UL	ENSG00000122417	ODF2L	1	rs2273941	86384941	T	G	0.36194	-0.0909868	0.0160479	2.4537e-07	0.000273695	0.00274516	FALSE
Glu-UL	ENSG00000286758		1	rs12141090	88182184	T	G	0.44403	0.161987	0.0349355	1.4433e-05	0.00560435	0.0326632	FALSE
Glu-UL	ENSG00000065243	PKN2	1	rs978965	88594274	C	A	0.358209	0.0482028	0.0102313	1.08883e-05	0.00411995	0.0257916	FALSE
Glu-UL	ENSG00000307222		1	rs6660788	88991904	C	T	0.152985	-0.257651	0.0521086	4.44846e-06	0.00158727	0.0118433	TRUE
Glu-UL	ENSG00000271949		1	rs473412	89762090	G	A	0.447761	-0.306692	0.0451379	2.13555e-09	3.93661e-06	6.53201e-05	TRUE
Glu-UL	ENSG00000162669	HFM1	1	rs281934	91348808	C	T	0.679105	-0.144404	0.0263479	5.30033e-07	0.000693696	0.00595667	FALSE
Glu-UL	ENSG00000097046	CDC7	1	rs13447526	91517617	G	A	0.455224	-0.229181	0.0262136	4.15078e-13	4.02587e-09	1.33884e-07	FALSE
Glu-UL	ENSG00000137936	BCAR3	1	rs2391322	93877467	A	G	0.369403	0.122997	0.0247294	3.97088e-06	0.00208321	0.0148656	FALSE
Glu-UL	ENSG00000117620	SLC35A3	1	rs593161	100158656	G	T	0.164179	-0.132865	0.0280641	9.97604e-06	0.00395693	0.0249429	FALSE
Glu-UL	ENSG00000122477	LRRC39	1	rs11580355	99792832	C	T	0.0447761	0.439471	0.0763851	1.7399e-07	0.000143814	0.00158831	FALSE
Glu-UL	ENSG00000162641	AKNAD1	1	rs71655969	108853754	C	T	0.123134	-0.429552	0.0943014	1.9603e-05	0.00959152	0.0498655	FALSE
Glu-UL	ENSG00000116299	ELAPOR1	1	rs113320465	109102235	C	T	0.0970149	0.211141	0.0406645	1.68316e-06	0.00117335	0.00913176	FALSE
Glu-UL	ENSG00000179902	CFAP276	1	rs113320465	109102235	C	T	0.0970149	0.37709	0.0755403	3.69944e-06	0.00241678	0.0167343	FALSE
Glu-UL	ENSG00000134184	GSTM1	1	rs1799875	109606352	C	T	0.38806	-0.480448	0.100092	7.76308e-06	0.00501073	0.0298795	FALSE
Glu-UL	ENSG00000134201	GSTM5	1	rs35817611	109704188	G	A	0.272388	-0.2826	0.0586942	7.33687e-06	0.00491784	0.0294449	FALSE
Glu-UL	ENSG00000177301	KCNA2	1	rs1979701	110629119	C	A	0.104478	-0.359725	0.0600239	6.43814e-08	9.84237e-05	0.00115906	FALSE
Glu-UL	ENSG00000134245	WNT2B	1	rs1537413	112474893	A	C	0.850746	-0.202818	0.0349797	1.44632e-07	0.000131076	0.00146491	FALSE
Glu-UL	ENSG00000134198	TSPAN2	1	rs755820	115074155	C	T	0.190299	-0.145822	0.0223784	7.05544e-09	1.64669e-05	0.000234039	FALSE
Glu-UL	ENSG00000163393	SLC22A15	1	rs1592234	115996260	C	T	0.615672	-0.24857	0.0362354	1.61085e-09	3.04471e-06	5.14318e-05	FALSE
Glu-UL	ENSG00000092621	PHGDH	1	rs478093	119712503	A	G	0.679105	-0.363005	0.0563429	9.65025e-09	1.17516e-05	0.000172987	TRUE
Glu-UL	ENSG00000131778	CHD1L	1	rs1890041	147242631	G	C	0.485075	-0.327688	0.0245803	1.38092e-21	1.8152e-16	2.67203e-14	TRUE
Glu-UL	ENSG00000143368	SF3B4	1	rs3738319	149843756	A	G	0.828358	0.2191	0.0532674	9.79044e-05	0.00843057	0.0451145	TRUE
Glu-UL	ENSG00000285184		1	rs78681982	150157902	G	A	0.0597015	-0.294896	0.0472996	2.3339e-08	9.03506e-06	0.00013631	FALSE
Glu-UL	ENSG00000228126	FALEC	1	rs11810419	150537646	C	T	0.119403	0.270781	0.0452279	6.60112e-08	7.01091e-05	0.000859003	FALSE
Glu-UL	ENSG00000290074		1	rs10888386	150639481	A	G	0.634328	-0.274001	0.0341196	9.6205e-12	3.86325e-08	1.05312e-06	FALSE
Glu-UL	ENSG00000163131	CTSS	1	rs16827671	150766283	T	C	0.395522	0.270453	0.0536354	3.0369e-06	0.0010625	0.00843473	FALSE
Glu-UL	ENSG00000143387	CTSK	1	rs3894771	150817485	A	T	0.485075	0.274571	0.0462362	8.08351e-08	6.54965e-05	0.000813123	FALSE
Glu-UL	ENSG00000295148		1	rs4970982	150892608	G	C	0.376866	-0.190616	0.0398344	8.21612e-06	0.00266393	0.0181547	FALSE
Glu-UL	ENSG00000236427	CCDST	1	rs34372395	152194931	A	G	0.205224	0.926711	0.107587	7.34235e-13	3.839e-09	1.30125e-07	FALSE
Glu-UL	ENSG00000169231	THBS3	1	rs760077	155208991	T	A	0.328358	-0.172893	0.0308495	3.20502e-07	0.00017266	0.00185625	TRUE
Glu-UL	ENSG00000132694	ARHGEF11	1	rs1572411	157000104	G	T	0.764925	-0.0802935	0.0143527	3.33998e-07	0.000389862	0.00370594	FALSE
Glu-UL	ENSG00000272668		1	rs11587021	159856126	C	T	0.328358	0.663624	0.0612291	4.41062e-17	4.33367e-13	2.99098e-11	FALSE
Glu-UL	ENSG00000272668		1	rs11587021	159856126	C	T	0.328358	0.663624	0.0612291	4.41062e-17	4.33367e-13	2.99098e-11	FALSE
Glu-UL	ENSG00000162729	IGSF8	1	rs12408242	160092144	T	C	0.197761	-0.320079	0.0476567	2.99079e-09	5.00827e-06	8.01341e-05	FALSE
Glu-UL	ENSG00000158769	F11R	1	rs10908821	161038745	C	G	0.115672	0.28436	0.0588983	6.97444e-06	0.00455934	0.0277827	TRUE
Glu-UL	ENSG00000270149		1	rs4656975	161014318	C	G	0.58209	-0.38045	0.0453963	2.05337e-12	7.6064e-09	2.36079e-07	FALSE
Glu-UL	ENSG00000132196	HSD17B7	1	rs2805056	162805931	G	T	0.0447761	0.676353	0.111237	4.4685e-08	7.19255e-05	0.000878125	FALSE
Glu-UL	ENSG00000143147	GPR161	1	rs10918827	168107806	C	T	0.313433	-0.0756362	0.0139287	6.49835e-07	0.000853003	0.00707124	FALSE
Glu-UL	ENSG00000143153	ATP1B1	1	rs1830493	169177970	A	G	0.350746	0.0999997	0.0204975	5.73961e-06	0.00393219	0.0248731	FALSE
Glu-UL	ENSG00000143156	NME7	1	rs12744655	169160444	A	T	0.350746	-0.126151	0.0152889	3.63605e-12	2.27189e-08	6.43134e-07	FALSE
Glu-UL	ENSG00000000460	FIRRM	1	rs10800489	169919890	G	A	0.906716	-0.34108	0.0480008	5.54799e-10	9.62518e-07	1.87486e-05	FALSE
Glu-UL	ENSG00000116132	PRRX1	1	rs11266740	170944726	C	G	0.272388	-0.263763	0.0528584	3.72711e-06	0.00232454	0.0162391	FALSE
Glu-UL	ENSG00000117533	VAMP4	1	rs2298914	171741265	C	T	0.164179	0.158975	0.034529	1.63178e-05	0.00895228	0.0473788	TRUE
Glu-UL	ENSG00000197959	DNM3	1	rs60956160	171772661	C	A	0.294776	-0.0899909	0.0182227	4.5549e-06	0.00297825	0.0199018	FALSE
Glu-UL	ENSG00000135845	PIGC	1	rs4471302	172397997	T	C	0.231343	0.244324	0.0350448	9.92551e-10	1.4741e-06	2.7124e-05	FALSE
Glu-UL	ENSG00000162753	SLC9C2	1	rs61826814	173725120	T	G	0.0970149	0.566897	0.0625924	1.03855e-13	4.4822e-10	1.76957e-08	FALSE
Glu-UL	ENSG00000285777		1	rs12561796	173664389	C	T	0.0895522	0.462029	0.0760417	4.55007e-08	4.10806e-05	0.000531122	FALSE
Glu-UL	ENSG00000183831	ANKRD45	1	rs12561796	173664389	C	T	0.0895522	0.316921	0.0496625	1.25254e-08	1.15439e-05	0.000171399	FALSE
Glu-UL	ENSG00000296616		1	rs10798295	173714815	C	T	0.425373	0.408709	0.0486934	1.93995e-12	6.6908e-09	2.10837e-07	TRUE
Glu-UL	ENSG00000120334	CENPL	1	rs1903410	173674644	G	A	0.0746269	0.508959	0.114215	2.8306e-05	0.00736107	0.0404967	FALSE
Glu-UL	ENSG00000116194	ANGPTL1	1	rs1544124	178851024	C	A	0.58209	-0.267517	0.0531585	3.15815e-06	0.00180705	0.0132246	FALSE
Glu-UL	ENSG00000162782	TDRD5	1	rs1999068	179591583	T	C	0.272388	0.687462	0.0643111	8.35991e-17	2.53358e-12	1.55397e-10	TRUE
Glu-UL	ENSG00000143340	FAM163A	1	rs2504033	179733884	G	T	0.298507	0.508905	0.0800849	1.40442e-08	0.000122619	0.00138541	TRUE
Glu-UL	ENSG00000198216	CACNA1E	1	rs3911590	181293022	A	G	0.559702	0.113459	0.0193771	1.14177e-07	0.000156439	0.00171305	FALSE
Glu-UL	ENSG00000135828	RNASEL	1	rs10489966	182606241	T	G	0.350746	0.533674	0.0474067	7.36229e-18	1.6733e-13	1.24943e-11	FALSE
Glu-UL	ENSG00000135862	LAMC1	1	rs4651149	183211270	C	T	0.227612	-0.14697	0.0288262	2.43754e-06	0.00140684	0.0106749	FALSE
Glu-UL	ENSG00000118197	DDX59	1	rs12082129	200681362	C	T	0.309702	-0.207755	0.0297183	9.13765e-10	2.66659e-06	4.57191e-05	FALSE
Glu-UL	ENSG00000159176	CSRP1	1	rs3850626	201412533	T	A	0.570895	0.203321	0.0409498	4.1057e-06	0.00425218	0.0264586	FALSE
Glu-UL	ENSG00000058668	ATP2B4	1	rs4246544	203444188	T	G	0.130597	-0.320724	0.0613481	1.46102e-06	0.00158353	0.011824	FALSE
Glu-UL	ENSG00000299390		1	rs11240607	203860610	T	C	0.0895522	-0.408111	0.0849738	7.68185e-06	0.00583058	0.0338477	TRUE
Glu-UL	ENSG00000174567	GOLT1A	1	rs4951048	204237081	T	C	0.36194	0.225127	0.0470842	8.33755e-06	0.00634527	0.0361632	FALSE
Glu-UL	ENSG00000198625	MDM4	1	rs4951384	204483386	A	T	0.682836	-0.0726009	0.0145662	3.8123e-06	0.00424959	0.0264585	FALSE
Glu-UL	ENSG00000117335	CD46	1	rs4844390	207761504	A	G	0.16791	-0.149003	0.0223226	3.57316e-09	6.43794e-06	9.97565e-05	FALSE
Glu-UL	ENSG00000226251	LINC02608	1	rs12736502	212343533	C	T	0.223881	0.443511	0.0560767	1.64385e-11	5.04613e-08	1.34358e-06	FALSE
Glu-UL	ENSG00000234915		1	rs4951582	212235438	G	T	0.33209	0.209338	0.0356977	1.10046e-07	0.000111142	0.00127959	TRUE
Glu-UL	ENSG00000123685	BATF3	1	rs1995689	212696505	A	G	0.130597	0.477491	0.0770404	2.72482e-08	3.36992e-05	0.000446252	FALSE
Glu-UL	ENSG00000143494	VASH2	1	rs6691872	213038108	C	A	0.529851	-0.132047	0.0224067	9.75595e-08	0.000140932	0.00156318	FALSE
Glu-UL	ENSG00000196660	SLC30A10	1	rs2231734	219916010	A	C	0.358209	0.184368	0.0290306	1.427e-08	1.95027e-05	0.000273045	FALSE
Glu-UL	ENSG00000136628	EPRS1	1	rs1982984	219972313	C	T	0.473881	-0.109635	0.020568	9.70933e-07	0.000736283	0.00625982	FALSE
Glu-UL	ENSG00000237101		1	rs12143576	224191000	C	G	0.179104	-0.358415	0.0744565	7.36598e-06	0.0042463	0.026454	FALSE
Glu-UL	ENSG00000185842	DNAH14	1	rs7533616	225102716	C	T	0.0522388	-0.563436	0.115865	6.09874e-06	0.00310781	0.0205808	FALSE
Glu-UL	ENSG00000143819	EPHX1	1	rs7548080	225784972	C	T	0.339552	0.169826	0.0312811	6.52984e-07	0.000705298	0.00603117	FALSE
Glu-UL	ENSG00000243709	LEFTY1	1	rs80097623	225919635	C	T	0.0858209	-0.377313	0.0811656	1.37983e-05	0.0079286	0.0430443	FALSE
Glu-UL	ENSG00000143801	PSEN2	1	rs12143886	226808075	G	C	0.220149	0.30135	0.030679	3.60026e-15	8.09312e-11	3.65761e-09	FALSE
Glu-UL	ENSG00000288674		1	rs2855562	226894149	G	A	0.563433	-0.312621	0.031171	1.46167e-15	3.83609e-11	1.81321e-09	FALSE
Glu-UL	ENSG00000225656		1	rs77517886	230833930	T	A	0.171642	0.370555	0.0697684	1.04828e-06	0.00120785	0.00936495	FALSE
Glu-UL	ENSG00000116906	GNPAT	1	rs542321	231264928	C	G	0.518657	-0.117311	0.0172855	2.20923e-09	5.06243e-06	8.07499e-05	FALSE
Glu-UL	ENSG00000135766	EGLN1	1	rs2486746	231361578	G	A	0.585821	-0.0853334	0.0183021	1.30975e-05	0.0088502	0.0469349	FALSE
Glu-UL	ENSG00000285053		1	rs2803841	235343538	G	A	0.30597	-0.221579	0.0271853	5.66544e-12	2.31077e-08	6.52349e-07	FALSE
Glu-UL	ENSG00000162885	B3GALNT2	1	rs704720	235503886	A	G	0.462687	-0.143636	0.0200105	4.0494e-10	9.12177e-07	1.78355e-05	TRUE
Glu-UL	ENSG00000143669	LYST	1	rs3768056	235744525	G	A	0.779851	0.105737	0.0211937	3.74053e-06	0.00322427	0.0212021	FALSE
Glu-UL	ENSG00000119285	HEATR1	1	rs12069618	236581671	G	A	0.108209	0.175419	0.0307384	2.10711e-07	0.000238044	0.00244065	FALSE
Glu-UL	ENSG00000302268		1	rs4659749	236911666	C	A	0.593284	-0.310115	0.0520943	7.6094e-08	0.000119673	0.00135659	FALSE
Glu-UL	ENSG00000054277	OPN3	1	rs3819979	241627905	G	A	0.0708955	0.254604	0.0523988	6.19149e-06	0.00655955	0.0370821	FALSE
Glu-UL	ENSG00000272865		1	rs1595121	242147130	T	G	0.429104	0.371864	0.0547188	2.1229e-09	6.73844e-06	0.000103789	TRUE
Glu-UL	ENSG00000054282	SDCCAG8	1	rs12124014	243213455	T	C	0.485075	-0.0788086	0.013987	2.83498e-07	0.000206324	0.00214316	FALSE
Glu-UL	ENSG00000203666	EFCAB2	1	rs10927360	244968145	A	T	0.511194	-0.221661	0.0298903	1.43392e-10	5.95331e-07	1.222e-05	FALSE
Glu-UL	ENSG00000305266		1	rs10927358	244966809	A	C	0.514925	-0.21509	0.0432832	4.03891e-06	0.00490347	0.0294101	FALSE
Glu-UL	ENSG00000197472	ZNF695	1	rs61852608	247008034	C	T	0.0559702	-0.466422	0.0648698	3.84197e-10	1.42906e-06	2.66281e-05	TRUE
Glu-UL	ENSG00000305271		1	rs6680033	247121719	A	G	0.328358	-0.489006	0.0537333	8.56834e-14	1.00134e-09	3.69823e-08	FALSE
Glu-UL	ENSG00000196418	ZNF124	1	rs78802037	247123967	T	C	0.276119	-0.21749	0.0195349	1.24827e-17	6.50485e-13	4.35244e-11	FALSE
Glu-UL	ENSG00000162714	ZNF496	1	rs10924983	247321312	A	C	0.615672	-0.0961113	0.0172899	3.85983e-07	0.000518553	0.0046871	FALSE
Glu-UL	ENSG00000235749		1	rs28535274	247645251	A	T	0.432836	0.40656	0.0579584	8.23922e-10	1.88952e-06	3.3502e-05	FALSE
Glu-UL	ENSG00000290612		1	rs6664332	247965627	G	A	0.365672	0.462528	0.0756879	3.92857e-08	4.82716e-05	0.000613319	FALSE
Glu-UL	ENSG00000197454	OR2L5	1	rs6664332	247965627	G	A	0.365672	0.510015	0.0964213	1.14352e-06	0.00101297	0.0081028	FALSE
Glu-UL	ENSG00000203663	OR2L2	1	rs6664332	247965627	G	A	0.365672	0.514192	0.101868	2.97554e-06	0.00221712	0.0156692	FALSE
Glu-UL	ENSG00000205740		10	rs11253517	924584	G	A	0.231343	-0.224077	0.0375088	6.97119e-08	0.000117623	0.00133629	FALSE
Glu-UL	ENSG00000304813		10	rs56039972	4830425	C	T	0.0746269	-0.458017	0.0884109	1.76318e-06	0.00188184	0.0136652	FALSE
Glu-UL	ENSG00000151632	AKR1C2	10	rs35767584	4999104	C	A	0.0820896	0.359034	0.0712962	3.11669e-06	0.00298981	0.0199661	FALSE
Glu-UL	ENSG00000196372	ASB13	10	rs7100767	6096190	T	A	0.335821	-0.191649	0.0371172	1.88729e-06	0.00352725	0.0227873	TRUE
Glu-UL	ENSG00000108021	TASOR2	10	rs11259192	5684858	G	A	0.0970149	0.119403	0.0223313	9.08667e-07	0.00153369	0.0115186	TRUE
Glu-UL	ENSG00000296415		10	rs1853628	10524977	T	C	0.932836	0.363088	0.0647474	3.16147e-07	0.000455994	0.00422163	FALSE
Glu-UL	ENSG00000183049	CAMK1D	10	rs2724796	12462820	T	C	0.776119	0.10978	0.021417	2.18869e-06	0.00288992	0.019463	FALSE
Glu-UL	ENSG00000152464	RPP38	10	rs7901851	15110235	G	T	0.313433	0.14891	0.0245596	4.80105e-08	0.000114164	0.00130708	FALSE
Glu-UL	ENSG00000152465	NMT2	10	rs6602818	15167431	C	T	0.414179	-0.0964874	0.0156306	3.02695e-08	7.55485e-05	0.000916926	TRUE
Glu-UL	ENSG00000148468	FAM171A1	10	rs11259577	15250214	G	A	0.238806	0.0769684	0.0155763	4.50249e-06	0.00647082	0.0367974	FALSE
Glu-UL	ENSG00000077943	ITGA8	10	rs10752034	16030212	C	G	0.716418	0.32726	0.0703609	1.36692e-05	0.00923591	0.0485556	FALSE
Glu-UL	ENSG00000148484	RSU1	10	rs813601	16806709	T	C	0.145522	0.138462	0.0249346	3.95158e-07	0.00052221	0.00470902	FALSE
Glu-UL	ENSG00000148488	ST8SIA6	10	rs45539934	17355203	C	G	0.212687	-0.44625	0.0885434	3.0672e-06	0.00373113	0.0238798	FALSE
Glu-UL	ENSG00000204740	MALRD1	10	rs4747376	19531630	G	T	0.835821	-0.611137	0.0917756	3.82628e-09	1.0516e-05	0.000156589	FALSE
Glu-UL	ENSG00000150867	PIP4K2A	10	rs1778318	22629274	T	A	0.0522388	-0.157262	0.0347699	2.21011e-05	0.00960712	0.0498962	FALSE
Glu-UL	ENSG00000107890	ANKRD26	10	rs11015446	27001765	T	G	0.156716	0.109296	0.0186961	1.18712e-07	0.0001902	0.002006	FALSE
Glu-UL	ENSG00000262412		10	rs12217860	27214889	C	T	0.615672	0.751857	0.0512079	6.82694e-24	4.35368e-18	9.30491e-16	FALSE
Glu-UL	ENSG00000302540		10	rs7894295	27309798	G	A	0.481343	0.371502	0.0717261	1.77084e-06	0.00146237	0.0110554	FALSE
Glu-UL	ENSG00000301548		10	rs12217860	27214889	C	T	0.615672	0.399643	0.0503572	1.45849e-11	5.48988e-08	1.43576e-06	FALSE
Glu-UL	ENSG00000237128	LINC02652	10	rs61848475	28532515	G	A	0.253731	0.580323	0.08176	5.74024e-10	1.73601e-06	3.1056e-05	TRUE
Glu-UL	ENSG00000183621	ZNF438	10	rs17229781	31010406	T	G	0.0932836	0.155207	0.029278	1.09125e-06	0.000758555	0.00641735	FALSE
Glu-UL	ENSG00000272381	LINC02664	10	rs3006588	31033164	A	G	0.190299	0.282594	0.049804	2.40961e-07	0.000211421	0.00218948	FALSE
Glu-UL	ENSG00000272381	LINC02664	10	rs3006588	31033164	A	G	0.190299	0.282594	0.049804	2.40961e-07	0.000211421	0.00218948	FALSE
Glu-UL	ENSG00000216937	CCDC7	10	rs9338799	32610034	G	A	0.208955	0.254877	0.0236302	5.52192e-17	3.97074e-12	2.32474e-10	FALSE
Glu-UL	ENSG00000287278		10	rs10827235	33323950	C	G	0.0932836	0.840623	0.0955915	3.31292e-13	3.03308e-09	1.05586e-07	TRUE
Glu-UL	ENSG00000189180	ZNF33A	10	rs1623969	37879832	A	G	0.123134	-0.107162	0.0223192	7.72416e-06	0.00128351	0.00986246	FALSE
Glu-UL	ENSG00000290439	HSD17B7P2	10	rs2505256	38080890	A	T	0.481343	0.280779	0.052153	7.83689e-07	9.5397e-05	0.00112988	FALSE
Glu-UL	ENSG00000215146		10	rs2505811	42377385	G	C	0.365672	0.68323	0.071718	1.31654e-14	1.12864e-10	4.92788e-09	FALSE
Glu-UL	ENSG00000291065		10	rs2505811	42377385	G	C	0.365672	1.17547	0.104467	7.53219e-18	1.15732e-13	8.89944e-12	FALSE
Glu-UL	ENSG00000185904	LINC00839	10	rs2505811	42377385	G	C	0.365672	0.833347	0.112939	1.68651e-10	3.67625e-07	7.9415e-06	FALSE
Glu-UL	ENSG00000169826	CSGALNACT2	10	rs9787519	43253842	G	T	0.44403	0.0545681	0.0110447	4.51497e-06	0.00301578	0.0201265	FALSE
Glu-UL	ENSG00000234504		10	rs117957541	44959607	G	C	0.104478	-0.456145	0.0612897	1.2761e-10	3.61577e-07	7.82726e-06	TRUE
Glu-UL	ENSG00000107551	RASSF4	10	rs7914175	44961415	C	A	0.593284	0.224624	0.0384109	1.17729e-07	0.000117455	0.00133586	FALSE
Glu-UL	ENSG00000188234	AGAP4	10	rs2303885	45382934	G	A	0.238806	-0.182608	0.0374849	5.89935e-06	0.000669758	0.00578344	FALSE
Glu-UL	ENSG00000204147	ASAH2B	10	rs9733527	50761555	G	A	0.652985	-0.184153	0.0366988	3.34198e-06	0.00184758	0.0134638	FALSE
Glu-UL	ENSG00000185532	PRKG1	10	rs11818460	51336356	A	C	0.231343	0.32143	0.0695742	1.53743e-05	0.00822614	0.0443264	FALSE
Glu-UL	ENSG00000165443	PHYHIPL	10	rs7068712	59085481	C	T	0.220149	-0.10001	0.0219984	2.02645e-05	0.00857384	0.0457383	FALSE
Glu-UL	ENSG00000148541	FAM13C	10	rs284634	59329550	A	G	0.395522	-0.120947	0.0210783	1.85352e-07	0.000137334	0.00152656	FALSE
Glu-UL	ENSG00000183346	CABCOCO1	10	rs71490861	61663118	A	G	0.0895522	0.665776	0.0821884	7.06528e-12	4.26019e-08	1.15218e-06	TRUE
Glu-UL	ENSG00000285837		10	rs3758490	62399574	G	T	0.544776	0.292728	0.0551728	1.07181e-06	0.000782402	0.00656519	FALSE
Glu-UL	ENSG00000096746	HNRNPH3	10	rs10997951	68152530	G	A	0.567164	0.0928091	0.0205531	2.27135e-05	0.00781812	0.0426439	FALSE
Glu-UL	ENSG00000165730	STOX1	10	rs71478860	68827436	C	G	0.145522	0.420372	0.0466058	1.22368e-13	9.66277e-10	3.58157e-08	TRUE
Glu-UL	ENSG00000156515	HK1	10	rs10998691	69281510	C	A	0.152985	-0.108334	0.0226661	8.39611e-06	0.00940689	0.0491536	FALSE
Glu-UL	ENSG00000138316	ADAMTS14	10	rs17600495	70697822	T	C	0.235075	0.822701	0.068289	2.64461e-19	1.01069e-14	1.02102e-12	TRUE
Glu-UL	ENSG00000122863	CHST3	10	rs4148908	71964790	G	A	0.712687	-0.2288	0.0487393	1.16102e-05	0.00840489	0.0450135	TRUE
Glu-UL	ENSG00000138286	FAM149B1	10	rs12257692	72944091	T	C	0.0895522	-0.151068	0.0369467	0.000106726	0.0080073	0.0433346	FALSE
Glu-UL	ENSG00000213551	DNAJC9	10	rs60860987	73339712	G	A	0.0783582	-0.185912	0.033937	5.35445e-07	7.64304e-05	0.00092545	FALSE
Glu-UL	ENSG00000172650	AGAP5	10	rs12413039	73765001	C	G	0.276119	-0.177282	0.0341105	1.65005e-06	0.00037635	0.00360074	FALSE
Glu-UL	ENSG00000291043		10	rs12775558	73811110	G	A	0.55597	-0.130308	0.0247698	1.28212e-06	0.000578582	0.00509125	TRUE
Glu-UL	ENSG00000151208	DLG5	10	rs2812427	77793478	A	C	0.36194	-0.0679376	0.0119468	2.28854e-07	0.000195888	0.00205547	FALSE
Glu-UL	ENSG00000178217	SH2D4B	10	rs36113069	80516039	G	T	0.186567	-0.206916	0.0435893	9.50783e-06	0.00727268	0.040096	FALSE
Glu-UL	ENSG00000272631		10	rs58334200	86753161	C	T	0.19403	-0.597079	0.0620995	8.94029e-15	1.52817e-10	6.45352e-09	FALSE
Glu-UL	ENSG00000122376	SHLD2	10	rs7477476	87037367	G	A	0.671642	0.0841991	0.0147939	2.24419e-07	0.000193295	0.00203241	FALSE
Glu-UL	ENSG00000305816		10	rs61859264	87377548	C	T	0.753731	0.41378	0.0714727	1.49991e-07	0.000112985	0.00129646	FALSE
Glu-UL	ENSG00000107798	LIPA	10	rs304412	89427876	A	T	0.216418	-0.333473	0.0365016	7.33666e-14	1.01934e-09	3.73897e-08	FALSE
Glu-UL	ENSG00000138182	KIF20B	10	rs12250365	89772422	G	A	0.302239	-0.15212	0.0308235	4.61166e-06	0.00301863	0.0201325	FALSE
Glu-UL	ENSG00000165338	HECTD2	10	rs144100420	90943212	G	A	0.0746269	0.157809	0.0304916	1.79878e-06	0.00101217	0.0081028	FALSE
Glu-UL	ENSG00000138160	KIF11	10	rs12358677	92525050	C	G	0.208955	0.427952	0.0436875	4.05026e-15	3.05089e-11	1.48991e-09	FALSE
Glu-UL	ENSG00000173145	NOC3L	10	rs12781422	94294032	G	A	0.175373	0.157907	0.0344834	1.79119e-05	0.00469312	0.0284073	FALSE
Glu-UL	ENSG00000119969	HELLS	10	rs1575269	94916135	G	A	0.171642	-0.143552	0.0269556	9.89967e-07	0.0003965	0.00375518	FALSE
Glu-UL	ENSG00000231829		10	rs55965825	95121443	G	T	0.0559702	-0.629709	0.124766	2.98156e-06	0.00201645	0.0144794	FALSE
Glu-UL	ENSG00000177853	ZNF518A	10	rs2000337	96215839	G	T	0.526119	-0.0794253	0.0167489	9.68441e-06	0.00495261	0.0296358	FALSE
Glu-UL	ENSG00000077147	TM9SF3	10	rs10882827	96612033	C	T	0.182836	-0.130064	0.0267341	6.04693e-06	0.00398049	0.025025	FALSE
Glu-UL	ENSG00000213390	ARHGAP19	10	rs112151411	97299668	C	T	0.0522388	0.382883	0.0811006	1.04909e-05	0.00593138	0.0342591	FALSE
Glu-UL	ENSG00000119943	PYROXD2	10	rs45523432	98407679	T	C	0.279851	0.229256	0.0446512	2.11617e-06	0.00136815	0.0104205	FALSE
Glu-UL	ENSG00000285932		10	rs3740078	99685834	A	C	0.309702	0.278214	0.0274739	9.56997e-16	1.62526e-11	8.29065e-10	TRUE
Glu-UL	ENSG00000095485	CWF19L1	10	rs10883451	100164661	T	C	0.451493	0.102849	0.0190844	7.66773e-07	0.000562163	0.00497652	FALSE
Glu-UL	ENSG00000186862	PDZD7	10	rs11597056	101032154	C	A	0.152985	0.733319	0.0751527	4.78307e-15	6.43445e-11	2.94676e-09	TRUE
Glu-UL	ENSG00000120049	KCNIP2	10	rs35366855	102118017	C	G	0.108209	-0.195163	0.0323578	5.48426e-08	2.88342e-05	0.000388386	TRUE
Glu-UL	ENSG00000107862	GBF1	10	rs11191191	102041222	G	A	0.160448	-0.0601199	0.0129736	1.45819e-05	0.00424007	0.0264425	FALSE
Glu-UL	ENSG00000138107	ACTR1A	10	rs2296580	102481926	G	T	0.276119	0.116099	0.0184948	1.94806e-08	2.12046e-05	0.000292499	FALSE
Glu-UL	ENSG00000138175	ARL3	10	rs8354	102676884	C	T	0.0895522	0.177433	0.0285042	2.43282e-08	1.97456e-05	0.000275322	FALSE
Glu-UL	ENSG00000214435	AS3MT	10	rs11191419	102852578	T	A	0.309702	-0.191474	0.0295754	8.44461e-09	1.17003e-05	0.000172726	FALSE
Glu-UL	ENSG00000107954	NEURL1	10	rs10748844	103565413	T	C	0.541045	-0.11524	0.0247085	1.30235e-05	0.00607315	0.0348703	FALSE
Glu-UL	ENSG00000107957	SH3PXD2A	10	rs7091346	103849066	C	T	0.38806	0.0793659	0.0128496	2.98208e-08	4.39247e-05	0.000565763	FALSE
Glu-UL	ENSG00000119950	MXI1	10	rs4917555	110231371	C	A	0.223881	0.173185	0.0192815	1.44565e-13	1.45448e-09	5.24032e-08	FALSE
Glu-UL	ENSG00000295359		10	rs61867965	114815035	A	T	0.507463	0.211532	0.0373363	2.49541e-07	0.00018425	0.00196132	FALSE
Glu-UL	ENSG00000187164	SHTN1	10	rs10218905	116997628	A	G	0.261194	-0.124876	0.0170399	2.10115e-10	4.9078e-07	1.02371e-05	FALSE
Glu-UL	ENSG00000170370	EMX2	10	rs363419	117255418	C	T	0.0783582	-0.378847	0.0719133	1.24517e-06	0.00115131	0.00899424	FALSE
Glu-UL	ENSG00000295480		10	rs196195	119764630	G	A	0.406716	1.99092	0.092321	3.97917e-34	2.08896e-27	3.07502e-24	FALSE
Glu-UL	ENSG00000303377		10	rs4751779	120277196	A	G	0.552239	0.241464	0.0513642	1.1321e-05	0.0075038	0.041172	FALSE
Glu-UL	ENSG00000203805	PLPP4	10	rs10886612	120146577	C	G	0.485075	0.337529	0.0686421	4.94423e-06	0.00428206	0.0265483	FALSE
Glu-UL	ENSG00000120008	WDR11	10	rs67199607	120907618	A	T	0.391791	-0.143592	0.0187842	5.26564e-11	1.96784e-07	4.43701e-06	FALSE
Glu-UL	ENSG00000293468		10	rs10887024	121928637	A	T	0.302239	-1.30781	0.070262	4.93453e-30	2.14411e-22	1.10467e-19	TRUE
Glu-UL	ENSG00000138152	BTBD16	10	rs4751887	122270243	G	A	0.548507	0.366306	0.046524	1.92205e-11	8.52872e-08	2.10244e-06	FALSE
Glu-UL	ENSG00000166033	HTRA1	10	rs2736916	122447627	C	T	0.16791	-0.350068	0.0598151	1.15512e-07	0.00018141	0.00193508	FALSE
Glu-UL	ENSG00000095574	IKZF5	10	rs10794573	122810103	G	T	0.242537	-0.146492	0.0311148	1.10204e-05	0.00789337	0.0429209	FALSE
Glu-UL	ENSG00000154478	GPR26	10	rs841020	123650437	C	T	0.231343	-0.35667	0.0582107	3.66966e-08	7.13899e-05	0.000872619	FALSE
Glu-UL	ENSG00000308000		10	rs4074389	123991899	C	G	0.876866	-0.410067	0.0770579	1.00585e-06	0.0014294	0.01083	TRUE
Glu-UL	ENSG00000107902	LHPP	10	rs1254949	124463423	C	T	0.30597	0.163011	0.0268367	4.58468e-08	7.6739e-05	0.000927171	FALSE
Glu-UL	ENSG00000189319	FAM53B	10	rs12049652	124811608	C	T	0.690298	0.144071	0.0194389	1.46132e-10	4.96347e-07	1.03323e-05	FALSE
Glu-UL	ENSG00000280953	LINC01163	10	rs7082338	128549258	A	C	0.447761	0.314229	0.0628271	3.56387e-06	0.00466138	0.0282874	TRUE
Glu-UL	ENSG00000170430	MGMT	10	rs12269324	129468206	T	A	0.238806	-0.236734	0.0346824	1.86637e-09	3.24243e-06	5.45927e-05	FALSE
Glu-UL	ENSG00000171811	CFAP46	10	rs4601687	132915641	T	C	0.526119	-0.189902	0.0396537	8.09799e-06	0.00599454	0.0345402	FALSE
Glu-UL	ENSG00000214279	SCART1	10	rs17882140	133381949	G	A	0.123134	-0.311282	0.0605045	2.03105e-06	0.00121568	0.00941149	FALSE
Glu-UL	ENSG00000288107		10	rs2249414	133443116	A	G	0.675373	0.469733	0.0549722	9.94263e-13	3.9937e-09	1.33611e-07	FALSE
Glu-UL	ENSG00000174915	PTDSS2	11	rs34612778	458441	G	C	0.145522	-0.135488	0.0259533	1.50498e-06	0.00157822	0.0117928	FALSE
Glu-UL	ENSG00000177106	EPS8L2	11	rs7107522	703175	A	G	0.164179	0.436551	0.0633329	1.39604e-09	5.21563e-06	8.26816e-05	FALSE
Glu-UL	ENSG00000177030	DEAF1	11	rs28410845	654229	T	C	0.63806	0.113546	0.0158757	4.53265e-10	1.36903e-06	2.56487e-05	FALSE
Glu-UL	ENSG00000214063	TSPAN4	11	rs4963207	856992	C	T	0.451493	0.203624	0.0369306	4.63629e-07	0.000616138	0.00536672	TRUE
Glu-UL	ENSG00000301036		11	rs36064646	1388965	G	C	0.660448	0.246149	0.0481868	2.34573e-06	0.00280917	0.0190312	TRUE
Glu-UL	ENSG00000005801	ZNF195	11	rs11026708	3356833	G	A	0.820895	0.152652	0.0312077	5.46151e-06	0.00477135	0.0287515	FALSE
Glu-UL	ENSG00000196565	HBG2	11	rs6578714	5993322	A	G	0.597015	-0.495283	0.0992472	3.7213e-06	0.00516628	0.0305946	FALSE
Glu-UL	ENSG00000110148	CCKBR	11	rs2682121	6328233	G	A	0.160448	0.483107	0.0823943	1.1043e-07	0.000157376	0.00172148	FALSE
Glu-UL	ENSG00000179532	DNHD1	11	rs11605621	6515941	G	A	0.190299	-0.159418	0.0321588	4.23417e-06	0.00396022	0.0249429	FALSE
Glu-UL	ENSG00000255410		11	rs2174702	6727771	A	G	0.850746	0.223997	0.043041	1.60501e-06	0.00154729	0.011587	FALSE
Glu-UL	ENSG00000291143		11	rs1466682	6926530	T	A	0.608209	0.227084	0.0377201	5.74625e-08	9.47576e-05	0.0011236	TRUE
Glu-UL	ENSG00000283415		11	rs1466682	6926530	T	A	0.608209	0.272155	0.0352386	3.7233e-11	1.21418e-07	2.90283e-06	TRUE
Glu-UL	ENSG00000166436	TRIM66	11	rs11042041	8692591	C	T	0.425373	0.275515	0.0358302	4.31831e-11	1.87527e-07	4.24685e-06	FALSE
Glu-UL	ENSG00000286959		11	rs11602716	11805873	G	A	0.156716	-0.276807	0.0502897	4.81724e-07	0.00090539	0.00744562	FALSE
Glu-UL	ENSG00000197702	PARVA	11	rs2403598	12367437	A	C	0.869403	-0.317158	0.0507186	2.15697e-08	4.43388e-05	0.000569672	FALSE
Glu-UL	ENSG00000287898		11	rs77889556	17476510	G	A	0.145522	0.851557	0.0834083	6.67095e-16	6.2068e-12	3.40194e-10	TRUE
Glu-UL	ENSG00000006071	ABCC8	11	rs77889556	17476510	G	A	0.145522	0.494313	0.0677073	2.37137e-10	4.27806e-07	9.05178e-06	TRUE
Glu-UL	ENSG00000188162	OTOG	11	rs7106302	17541942	T	C	0.496269	-0.276804	0.0531233	1.56526e-06	0.00109508	0.00866	FALSE
Glu-UL	ENSG00000302464		11	rs3741202	18013045	G	C	0.58209	-0.731191	0.0534344	3.37935e-22	2.19584e-17	4.04044e-15	TRUE
Glu-UL	ENSG00000166800	LDHAL6A	11	rs11605559	18457664	C	T	0.335821	0.434763	0.0675829	1.006e-08	1.28767e-05	0.000187939	FALSE
Glu-UL	ENSG00000254530	LINC02755	11	rs1222216	30324505	C	T	0.171642	0.393284	0.0507158	3.24221e-11	8.49207e-08	2.10244e-06	FALSE
Glu-UL	ENSG00000152219	ARL14EP	11	rs676217	30174210	G	T	0.645522	0.198715	0.0361519	4.9677e-07	0.000269787	0.00271214	FALSE
Glu-UL	ENSG00000170946	DNAJC24	11	rs4922860	31371448	A	G	0.302239	-0.126663	0.0229042	4.33697e-07	0.000117061	0.00133284	FALSE
Glu-UL	ENSG00000286626		11	rs73497025	34052864	A	C	0.156716	0.327161	0.0557852	1.09831e-07	0.000127231	0.00142968	TRUE
Glu-UL	ENSG00000309692		11	rs1891288	34795957	C	G	0.0820896	1.17865	0.201077	1.112e-07	0.000601156	0.00526292	FALSE
Glu-UL	ENSG00000149089	APIP	11	rs55672020	34884440	T	C	0.33209	0.586115	0.0231408	8.57073e-39	7.77764e-32	4.00714e-28	FALSE
Glu-UL	ENSG00000135362	PRR5L	11	rs2084221	36231747	G	T	0.66791	-0.177034	0.0361057	5.21948e-06	0.00446654	0.0274444	FALSE
Glu-UL	ENSG00000285751		11	rs10768431	38889541	C	T	0.279851	0.70312	0.150566	1.2738e-05	0.0046886	0.0284073	FALSE
Glu-UL	ENSG00000151348	EXT2	11	rs11037864	44107536	A	T	0.287313	-0.104803	0.0173517	5.29183e-08	9.0089e-05	0.00107567	FALSE
Glu-UL	ENSG00000165916	PSMC3	11	rs72895718	47832241	C	T	0.0708955	0.253985	0.0598278	6.10921e-05	0.00920294	0.048506	FALSE
Glu-UL	ENSG00000303405		11	rs72914704	61132546	G	T	0.0783582	0.775915	0.104542	1.39519e-10	4.05988e-07	8.66128e-06	FALSE
Glu-UL	ENSG00000221968	FADS3	11	rs174594	61852357	C	A	0.578358	-0.174647	0.0329981	1.12906e-06	0.0010083	0.00808898	FALSE
Glu-UL	ENSG00000162174	ASRGL1	11	rs1043789	62393257	G	A	0.36194	-0.0863157	0.01619	9.66812e-07	0.00100594	0.00807904	FALSE
Glu-UL	ENSG00000255432		11	rs12291465	62669528	C	T	0.238806	0.385825	0.056958	2.33479e-09	3.02797e-06	5.1233e-05	FALSE
Glu-UL	ENSG00000304841		11	rs7123026	64138347	C	T	0.156716	0.294521	0.0591281	3.85903e-06	0.0020003	0.0143835	TRUE
Glu-UL	ENSG00000168056	LTBP3	11	rs1111934	65561921	A	G	0.328358	-0.126621	0.0272681	1.40685e-05	0.00529245	0.0311315	FALSE
Glu-UL	ENSG00000297007		11	rs557675	65799248	T	G	0.410448	-0.334818	0.0380281	3.16164e-13	1.56632e-09	5.60406e-08	FALSE
Glu-UL	ENSG00000254470	AP5B1	11	rs557675	65799248	T	G	0.410448	-0.177635	0.0310047	1.92101e-07	0.000131745	0.00147079	FALSE
Glu-UL	ENSG00000172803	SNX32	11	rs566266	65806116	A	C	0.384328	0.284687	0.0251177	5.31342e-18	1.74276e-13	1.29193e-11	FALSE
Glu-UL	ENSG00000087365	SF3B2	11	rs34123790	66031248	C	T	0.302239	-0.103211	0.0193914	1.00188e-06	0.000538243	0.00481439	FALSE
Glu-UL	ENSG00000255320		11	rs12146493	65779862	G	A	0.33209	-0.225947	0.0457023	4.45878e-06	0.00220439	0.01559	TRUE
Glu-UL	ENSG00000179292	TMEM151A	11	rs117297304	66420833	C	G	0.0559702	-0.491981	0.109347	2.41335e-05	0.00784252	0.0427121	TRUE
Glu-UL	ENSG00000172613	RAD9A	11	rs72932730	67366129	G	A	0.145522	-0.12099	0.0258449	1.2194e-05	0.00431651	0.0267138	FALSE
Glu-UL	ENSG00000290995		11	rs11228091	67949932	G	A	0.541045	-0.218868	0.043175	2.73316e-06	0.00252764	0.0173636	FALSE
Glu-UL	ENSG00000132740	IGHMBP2	11	rs553875	68927676	T	G	0.291045	0.140604	0.026221	8.54372e-07	0.000872191	0.00721289	FALSE
Glu-UL	ENSG00000162341	TPCN2	11	rs10896415	69071866	G	A	0.365672	-0.148775	0.0230397	9.0693e-09	1.35161e-05	0.000196163	FALSE
Glu-UL	ENSG00000287725		11	rs3829241	69087895	G	A	0.395522	-0.42521	0.0440695	7.71116e-15	1.94213e-10	7.94136e-09	FALSE
Glu-UL	ENSG00000284713	SMIM38	11	rs4930652	69096881	A	G	0.5	0.300374	0.0544285	4.54307e-07	0.000522349	0.00470902	FALSE
Glu-UL	ENSG00000301530		11	rs12280942	69092215	A	G	0.626866	-0.444748	0.0613135	2.91225e-10	9.02466e-07	1.77128e-05	FALSE
Glu-UL	ENSG00000131626	PPFIA1	11	rs61887401	70295059	G	T	0.369403	-0.105584	0.0134351	2.04989e-11	8.1871e-08	2.03773e-06	FALSE
Glu-UL	ENSG00000306221		11	rs1135029	72578247	T	C	0.514925	-0.185026	0.0397593	1.35423e-05	0.00639986	0.0364341	FALSE
Glu-UL	ENSG00000293324		11	rs4387374	75021365	C	T	0.291045	-0.217511	0.0287483	7.42437e-11	3.21268e-07	7.0285e-06	FALSE
Glu-UL	ENSG00000166435	XRRA1	11	rs9787897	74948257	A	T	0.302239	0.862869	0.0257017	2.47317e-47	4.02537e-39	4.14784e-35	FALSE
Glu-UL	ENSG00000137486	ARRB1	11	rs527106	75343392	G	C	0.5	-0.0579087	0.0125091	1.48415e-05	0.00697172	0.0389368	FALSE
Glu-UL	ENSG00000078124	ACER3	11	rs10899313	76919459	G	A	0.682836	0.0796885	0.0128953	2.94281e-08	3.69875e-05	0.000486754	FALSE
Glu-UL	ENSG00000074201	CLNS1A	11	rs4944171	77610267	T	C	0.123134	-0.154305	0.0237018	7.2363e-09	9.52667e-06	0.000143098	FALSE
Glu-UL	ENSG00000087884	AAMDC	11	rs10899386	77535381	T	C	0.246269	-0.119498	0.0221542	7.52247e-07	0.00035372	0.00341915	FALSE
Glu-UL	ENSG00000254459		11	rs4945223	77881899	T	G	0.134328	-0.622853	0.0581734	7.763e-17	1.69655e-12	1.07929e-10	FALSE
Glu-UL	ENSG00000159063	ALG8	11	rs641686	78072414	G	A	0.395522	-0.118903	0.0230523	1.92792e-06	0.000697976	0.00598345	FALSE
Glu-UL	ENSG00000297818		11	rs11237593	78712360	C	G	0.0559702	0.705523	0.1293	5.84568e-07	0.000442903	0.00411151	FALSE
Glu-UL	ENSG00000302828		11	rs563777	80123108	G	A	0.929105	0.502707	0.0999589	3.1991e-06	0.00600298	0.0345467	FALSE
Glu-UL	ENSG00000245832	MIR4300HG	11	rs74525664	82681505	A	G	0.0895522	0.808158	0.101773	1.4292e-11	7.68752e-08	1.92267e-06	FALSE
Glu-UL	ENSG00000182103	FAM181B	11	rs6592027	82259962	C	T	0.0559702	-0.656545	0.131899	3.91107e-06	0.00269088	0.0183141	FALSE
Glu-UL	ENSG00000137501	SYTL2	11	rs4296062	85818140	T	C	0.13806	-0.223897	0.0469841	8.86259e-06	0.0037133	0.0238232	FALSE
Glu-UL	ENSG00000309946		11	rs1452134	86422374	T	C	0.529851	0.230921	0.0287509	9.57056e-12	5.8062e-08	1.49599e-06	FALSE
Glu-UL	ENSG00000255250		11	rs11530863	86653609	A	C	0.13806	0.414987	0.0550907	8.58959e-11	2.23138e-07	4.96601e-06	FALSE
Glu-UL	ENSG00000150687	PRSS23	11	rs2511083	86476028	C	A	0.279851	-0.207646	0.0318486	6.9484e-09	1.47693e-05	0.000212255	TRUE
Glu-UL	ENSG00000109861	CTSC	11	rs7358339	88376749	T	G	0.201493	-0.356808	0.0701966	2.59059e-06	0.00264419	0.0180559	FALSE
Glu-UL	ENSG00000297932		11	rs10830448	90220123	C	G	0.33209	-0.46226	0.0552106	2.1269e-12	1.49868e-08	4.41221e-07	FALSE
Glu-UL	ENSG00000166002	SMCO4	11	rs12807762	93336636	A	G	0.36194	0.287239	0.046771	3.45765e-08	4.01885e-05	0.000520896	FALSE
Glu-UL	ENSG00000250519		11	rs16920039	94198246	G	A	0.432836	-0.396989	0.0516154	4.28382e-11	1.21973e-07	2.90935e-06	FALSE
Glu-UL	ENSG00000020922	MRE11	11	rs1257769	94420759	G	A	0.324627	0.205879	0.0202395	7.84659e-16	6.76704e-12	3.68938e-10	FALSE
Glu-UL	ENSG00000186280	KDM4D	11	rs11021118	95275315	C	T	0.365672	0.201632	0.041979	7.67058e-06	0.00474328	0.0285991	FALSE
Glu-UL	ENSG00000087053	MTMR2	11	rs480079	95910613	T	A	0.373134	0.0965229	0.0163848	9.84538e-08	0.00013406	0.001495	FALSE
Glu-UL	ENSG00000149231	CCDC82	11	rs11021552	96364768	C	T	0.123134	0.274378	0.0315842	5.30565e-13	3.80404e-09	1.30125e-07	TRUE
Glu-UL	ENSG00000110318	CEP126	11	rs1004352	101906420	G	A	0.373134	-0.20496	0.0286113	4.31238e-10	1.17456e-06	2.23714e-05	FALSE
Glu-UL	ENSG00000182359	KBTBD3	11	rs10750731	105623378	T	C	0.891791	0.263225	0.0518721	2.67838e-06	0.00132239	0.0101235	FALSE
Glu-UL	ENSG00000261098		11	rs7926602	107183916	G	A	0.537313	-0.221529	0.0481433	1.64806e-05	0.00924131	0.0485592	TRUE
Glu-UL	ENSG00000048028	USP28	11	rs660800	114169788	A	G	0.134328	-0.121445	0.0255467	9.26175e-06	0.00715681	0.0396958	TRUE
Glu-UL	ENSG00000149591	TAGLN	11	rs6589598	117131687	A	G	0.791045	0.307362	0.0627104	5.25857e-06	0.00428594	0.0265564	FALSE
Glu-UL	ENSG00000110274	CEP164	11	rs516712	117321660	A	G	0.395522	0.130563	0.0185091	6.9471e-10	2.16173e-06	3.79472e-05	FALSE
Glu-UL	ENSG00000137731	FXYD2	11	rs562089	117839403	C	A	0.824627	-0.303212	0.0556539	6.04463e-07	0.000881234	0.00728183	FALSE
Glu-UL	ENSG00000278376		11	rs61901410	118790488	C	G	0.0932836	0.360856	0.074444	6.47435e-06	0.00304379	0.0202479	TRUE
Glu-UL	ENSG00000196914	ARHGEF12	11	rs7940963	120477735	A	G	0.58209	-0.0558728	0.0105395	1.09066e-06	0.00110979	0.00874945	FALSE
Glu-UL	ENSG00000166257	SCN3B	11	rs947913	123652135	G	A	0.0932836	-0.151129	0.0310902	6.14362e-06	0.00496218	0.0296414	FALSE
Glu-UL	ENSG00000149557	FEZ1	11	rs11220079	125450033	T	G	0.335821	-0.13057	0.0174445	1.05962e-10	4.26524e-07	9.04321e-06	FALSE
Glu-UL	ENSG00000149557	FEZ1	11	rs11220079	125450033	T	G	0.335821	-0.13057	0.0174445	1.05962e-10	4.26524e-07	9.04321e-06	FALSE
Glu-UL	ENSG00000149554	CHEK1	11	rs35852387	125682600	A	G	0.0746269	0.263253	0.0560559	1.15273e-05	0.00837902	0.044945	FALSE
Glu-UL	ENSG00000120451	SNX19	11	rs57336947	130894514	T	C	0.171642	0.276652	0.0265572	2.70988e-16	3.14601e-12	1.89574e-10	TRUE
Glu-UL	ENSG00000251226	LINC02714	11	rs7119012	134762742	G	C	0.794776	-0.820816	0.121693	2.64446e-09	1.35164e-05	0.000196163	FALSE
Glu-UL	ENSG00000120645	IQSEC3	12	rs12425974	87409	G	C	0.503731	-0.117111	0.0221138	1.11469e-06	0.00077935	0.0065556	FALSE
Glu-UL	ENSG00000120647	CCDC77	12	rs9668495	389571	C	G	0.761194	0.185788	0.0325483	2.09621e-07	0.000278958	0.00279072	TRUE
Glu-UL	ENSG00000060237	WNK1	12	rs10849585	915700	A	C	0.123134	-0.104072	0.0186567	3.56596e-07	0.000486293	0.00445016	FALSE
Glu-UL	ENSG00000082805	ERC1	12	rs74059513	1401383	A	G	0.119403	0.07891	0.0170248	1.45287e-05	0.00960074	0.0498882	FALSE
Glu-UL	ENSG00000250770		12	rs887356	3366355	T	C	0.895522	0.575309	0.0960368	6.50634e-08	0.000112337	0.00129047	TRUE
Glu-UL	ENSG00000291189		12	rs1860423	3365890	C	T	0.619403	-0.401561	0.0627631	1.16756e-08	3.07864e-05	0.000411453	TRUE
Glu-UL	ENSG00000285901		12	rs61909599	4566495	G	C	0.104478	0.449833	0.0877449	2.18202e-06	0.00404204	0.025381	FALSE
Glu-UL	ENSG00000078237	TIGAR	12	rs11063172	4467795	A	G	0.0559702	0.389571	0.0735293	1.10438e-06	0.00126409	0.00974232	FALSE
Glu-UL	ENSG00000130035	GALNT8	12	rs766505	4766168	T	G	0.563433	-0.0824057	0.0137619	6.57645e-08	0.000125166	0.00141109	FALSE
Glu-UL	ENSG00000139190	VAMP1	12	rs7310211	6497852	G	C	0.552239	0.336371	0.0554515	4.74392e-08	5.1626e-05	0.00065192	FALSE
Glu-UL	ENSG00000111652	COPS7A	12	rs2365567	6734681	A	G	0.708955	-0.193245	0.0307922	1.96127e-08	3.17398e-05	0.000421462	FALSE
Glu-UL	ENSG00000111664	GNB3	12	rs1129649	6839304	T	C	0.354478	-0.216216	0.0400193	7.25863e-07	0.000582641	0.00512072	FALSE
Glu-UL	ENSG00000182326	C1S	12	rs2041601	6971420	G	C	0.141791	-0.148535	0.0314078	1.01705e-05	0.00592794	0.0342585	FALSE
Glu-UL	ENSG00000166532	RIMKLB	12	rs7305213	8867374	A	G	0.410448	-0.0798514	0.0173952	1.7177e-05	0.00712253	0.0395646	FALSE
Glu-UL	ENSG00000237248	LINC00987	12	rs61916006	9033014	A	G	0.298507	-0.164184	0.0223111	1.83947e-10	7.21196e-07	1.444e-05	FALSE
Glu-UL	ENSG00000295087		12	rs2113899	9280887	T	C	0.492537	-0.451003	0.0484091	3.3134e-14	5.34142e-10	2.06915e-08	FALSE
Glu-UL	ENSG00000284634		12	rs7315975	9463831	T	C	0.0820896	0.530689	0.0654842	6.95796e-12	5.57656e-08	1.45107e-06	FALSE
Glu-UL	ENSG00000295873		12	rs12423201	9279684	T	C	0.0746269	0.509793	0.0881259	1.52815e-07	0.000187933	0.00198893	FALSE
Glu-UL	ENSG00000214776		12	rs7301615	9583033	C	G	0.559702	-1.33912	0.0750853	6.98546e-29	2.03837e-22	1.10467e-19	FALSE
Glu-UL	ENSG00000256594		12	rs10844327	9652637	T	G	0.100746	0.496249	0.0964149	2.01318e-06	0.00181975	0.0133081	FALSE
Glu-UL	ENSG00000134539	KLRD1	12	rs10743874	10224669	C	T	0.839552	-0.338957	0.0643315	1.24113e-06	0.00110262	0.00869962	FALSE
Glu-UL	ENSG00000212127	TAS2R14	12	rs34685383	11037833	A	C	0.238806	-0.0875093	0.0143073	3.84034e-08	4.59379e-05	0.00058729	FALSE
Glu-UL	ENSG00000212127	TAS2R14	12	rs34685383	11037833	A	C	0.238806	-0.0875093	0.0143073	3.84034e-08	4.59379e-05	0.00058729	FALSE
Glu-UL	ENSG00000111215	PRR4	12	rs6488330	10928671	T	C	0.544776	-0.179924	0.033178	6.69136e-07	0.000663615	0.00574143	FALSE
Glu-UL	ENSG00000111215	PRR4	12	rs6488330	10928671	T	C	0.544776	-0.179924	0.033178	6.69136e-07	0.000663615	0.00574143	FALSE
Glu-UL	ENSG00000231887	PRH1	12	rs68186227	11119112	T	C	0.309702	-0.152654	0.0191113	1.16257e-11	5.04262e-08	1.34358e-06	FALSE
Glu-UL	ENSG00000275119		12	rs10845235	10904405	C	T	0.55597	-0.424841	0.0313935	6.16643e-22	5.14189e-17	8.15127e-15	FALSE
Glu-UL	ENSG00000247157	LINC01252	12	rs1863848	11176054	C	T	0.574627	-0.371635	0.0401084	4.14193e-14	2.65527e-10	1.07296e-08	FALSE
Glu-UL	ENSG00000296981		12	rs1047712	11171765	G	A	0.574627	-0.361932	0.0466536	3.19708e-11	1.06927e-07	2.59859e-06	TRUE
Glu-UL	ENSG00000165714	BORCS5	12	rs10772552	12357163	C	T	0.477612	-0.127441	0.0196645	8.20796e-09	2.16697e-05	0.000297719	TRUE
Glu-UL	ENSG00000255670		12	rs66487618	12465875	C	T	0.152985	0.360271	0.0615569	1.15437e-07	0.000200566	0.0020939	FALSE
Glu-UL	ENSG00000178878	APOLD1	12	rs34323	12726123	G	A	0.574627	-0.272526	0.0321293	1.31159e-12	8.01727e-09	2.47341e-07	FALSE
Glu-UL	ENSG00000255910		12	rs10160869	19652250	A	G	0.679105	-0.229515	0.0414932	4.3148e-07	0.000760368	0.00642741	FALSE
Glu-UL	ENSG00000139163	ETNK1	12	rs7135064	22716475	G	T	0.537313	0.0870125	0.015217	2.01141e-07	0.000188002	0.00198893	FALSE
Glu-UL	ENSG00000123094	RASSF8	12	rs7295800	25732089	G	T	0.824627	-0.247962	0.0476721	1.62337e-06	0.00139346	0.0105811	FALSE
Glu-UL	ENSG00000255750		12	rs12303723	26327825	A	G	0.160448	0.817805	0.0907831	1.28677e-13	1.24009e-09	4.49936e-08	FALSE
Glu-UL	ENSG00000123104	ITPR2	12	rs112152193	26838050	C	G	0.175373	-0.290887	0.0471603	3.09061e-08	7.67525e-05	0.000927171	FALSE
Glu-UL	ENSG00000029153	BMAL2	12	rs11610949	27334535	T	C	0.0783582	0.23634	0.0487545	6.46937e-06	0.00501494	0.0298873	FALSE
Glu-UL	ENSG00000257176		12	rs7136223	29284928	A	G	0.313433	0.337556	0.0430232	2.17025e-11	9.02151e-08	2.20807e-06	FALSE
Glu-UL	ENSG00000087502	ERGIC2	12	rs144130541	29094024	G	A	0.115672	0.182354	0.0344722	1.1416e-06	0.000939474	0.00767081	FALSE
Glu-UL	ENSG00000013573	DDX11	12	rs4031360	31080585	G	A	0.451493	-0.841588	0.0557997	1.4827e-24	6.03595e-19	1.63673e-16	FALSE
Glu-UL	ENSG00000257239		12	rs6582371	41928509	C	A	0.597015	0.57887	0.0496577	1.35571e-18	8.05692e-14	6.38619e-12	FALSE
Glu-UL	ENSG00000151233	GXYLT1	12	rs11181340	42122574	A	G	0.175373	-0.182603	0.0395889	1.5813e-05	0.00721123	0.0398853	FALSE
Glu-UL	ENSG00000134283	PPHLN1	12	rs11181414	42310263	T	C	0.152985	0.116125	0.0220299	1.22964e-06	0.000954106	0.00777181	FALSE
Glu-UL	ENSG00000139168	ZCRB1	12	rs12231335	42468306	A	G	0.414179	0.156736	0.0277933	2.77841e-07	0.000336596	0.00327514	FALSE
Glu-UL	ENSG00000257225		12	rs10880301	42454197	G	A	0.134328	0.545514	0.0821386	4.12744e-09	7.13794e-06	0.000109451	FALSE
Glu-UL	ENSG00000211584	SLC48A1	12	rs10747524	47829691	C	T	0.492537	-0.142966	0.02867	3.77686e-06	0.00316975	0.0208835	FALSE
Glu-UL	ENSG00000269514		12	rs10875763	48187076	G	A	0.36194	-0.417374	0.0473162	2.94023e-13	2.25723e-09	7.93823e-08	FALSE
Glu-UL	ENSG00000309720		12	rs833842	48971640	A	C	0.432836	-0.121734	0.0251749	6.77573e-06	0.00294599	0.0197374	TRUE
Glu-UL	ENSG00000110844	PRPF40B	12	rs1248365	49568784	G	A	0.690298	-0.0851344	0.0150294	2.50646e-07	0.000153494	0.0016872	FALSE
Glu-UL	ENSG00000066117	SMARCD1	12	rs923911	49964391	C	A	0.201493	0.100407	0.0199001	3.00019e-06	0.00120275	0.00933608	FALSE
Glu-UL	ENSG00000139624	CERS5	12	rs836179	50109299	A	G	0.36194	0.190072	0.018599	6.38793e-16	6.01799e-12	3.33392e-10	FALSE
Glu-UL	ENSG00000050405	LIMA1	12	rs7486874	50156261	G	A	0.253731	0.0958247	0.0205836	1.34531e-05	0.00461234	0.0280228	FALSE
Glu-UL	ENSG00000111077	TNS2	12	rs11610008	53046798	C	T	0.55597	0.215548	0.0294045	2.0827e-10	6.01947e-07	1.23312e-05	TRUE
Glu-UL	ENSG00000123415	SMUG1	12	rs2233921	54182016	C	A	0.376866	0.428362	0.034988	1.1719e-19	1.60849e-15	1.94991e-13	FALSE
Glu-UL	ENSG00000135424	ITGA7	12	rs3817532	55695425	C	T	0.492537	-0.202607	0.0368276	4.87159e-07	0.000285214	0.00284503	FALSE
Glu-UL	ENSG00000197728	RPS26	12	rs10876864	56007301	G	A	0.597015	-0.302337	0.0454384	3.91375e-09	5.03546e-06	8.04443e-05	TRUE
Glu-UL	ENSG00000257727	CNPY2	12	rs11171846	56434272	C	T	0.104478	0.201303	0.0444799	2.18737e-05	0.00796989	0.0432003	FALSE
Glu-UL	ENSG00000123427	EEF1AKMT3	12	rs870392	57825390	C	A	0.268657	0.33512	0.0436617	4.59388e-11	1.444e-07	3.3512e-06	FALSE
Glu-UL	ENSG00000118596	SLC16A7	12	rs12227882	59864931	C	A	0.238806	-0.111174	0.0205923	7.37547e-07	0.000428392	0.00399119	FALSE
Glu-UL	ENSG00000177990	DPY19L2	12	rs10878073	63668243	A	C	0.231343	-0.206991	0.0301233	1.5321e-09	2.63746e-06	4.5295e-05	TRUE
Glu-UL	ENSG00000111490	TBC1D30	12	rs1690278	64739864	C	G	0.447761	0.101263	0.0204281	4.23672e-06	0.002353	0.0164045	FALSE
Glu-UL	ENSG00000288591		12	rs17764513	64876436	A	G	0.13806	-0.328607	0.0445617	1.72022e-10	2.00495e-07	4.50991e-06	FALSE
Glu-UL	ENSG00000127311	HELB	12	rs11176126	66288882	T	C	0.485075	0.202363	0.0252695	1.06193e-11	3.28638e-08	9.0063e-07	FALSE
Glu-UL	ENSG00000135679	MDM2	12	rs10784760	69117754	A	G	0.44403	-0.0928363	0.0186771	4.01956e-06	0.00389515	0.0247097	FALSE
Glu-UL	ENSG00000166225	FRS2	12	rs504052	69580872	C	T	0.552239	0.0747125	0.0156955	9.04273e-06	0.00667357	0.0376594	FALSE
Glu-UL	ENSG00000166268	MYRFL	12	rs775462	69710168	A	G	0.104478	0.913482	0.0736546	6.06856e-20	9.07444e-15	9.25794e-13	FALSE
Glu-UL	ENSG00000257815	PRANCR	12	rs11609337	70172567	C	T	0.141791	0.725837	0.0555869	4.16255e-21	5.2632e-16	7.32882e-14	FALSE
Glu-UL	ENSG00000251138	LINC02882	12	rs77701788	74543361	A	G	0.0820896	0.682077	0.0817577	2.42824e-12	5.55083e-08	1.44803e-06	FALSE
Glu-UL	ENSG00000180481	GLIPR1L2	12	rs11180483	75391320	C	T	0.373134	-0.656886	0.0502362	3.86613e-21	1.11967e-16	1.722e-14	TRUE
Glu-UL	ENSG00000257526		12	rs73385560	76531139	G	A	0.100746	-0.398626	0.0570884	9.46871e-10	1.66759e-06	3.00933e-05	FALSE
Glu-UL	ENSG00000175183	CSRP2	12	rs12299333	76878847	A	G	0.246269	0.146231	0.0289906	3.01718e-06	0.00241239	0.0167168	TRUE
Glu-UL	ENSG00000067798	NAV3	12	rs771617	77137854	A	G	0.746269	-0.101221	0.0213477	9.70603e-06	0.00824646	0.0443958	FALSE
Glu-UL	ENSG00000067715	SYT1	12	rs55849625	78828229	C	T	0.283582	-0.130915	0.0173158	7.60906e-11	1.61319e-07	3.70217e-06	FALSE
Glu-UL	ENSG00000257191		12	rs17045837	78831281	A	G	0.287313	-0.152584	0.032574	1.20639e-05	0.00376006	0.02405	FALSE
Glu-UL	ENSG00000198707	CEP290	12	rs77903603	88030835	A	G	0.0522388	0.263752	0.05121	1.98648e-06	0.000670715	0.00578344	FALSE
Glu-UL	ENSG00000289384		12	rs11104832	88358844	T	C	0.104478	0.930963	0.0828524	8.04881e-18	1.11979e-13	8.67562e-12	FALSE
Glu-UL	ENSG00000286608		12	rs17362956	89383534	C	G	0.126866	0.180542	0.034592	1.51268e-06	0.0008027	0.0067082	FALSE
Glu-UL	ENSG00000277851	LINC02391	12	rs7132395	92288518	T	C	0.0970149	0.537987	0.101493	1.09317e-06	0.00127044	0.00978398	TRUE
Glu-UL	ENSG00000257252		12	rs10859490	93383200	A	C	0.429104	-0.237821	0.0406389	1.15731e-07	0.00012687	0.00142719	FALSE
Glu-UL	ENSG00000302422		12	rs12830405	94497383	C	A	0.164179	0.231908	0.0474911	5.63958e-06	0.00513412	0.0304567	FALSE
Glu-UL	ENSG00000139343	SNRPF	12	rs77751297	95853480	G	T	0.152985	-0.221748	0.0374969	8.95808e-08	0.000142402	0.0015744	FALSE
Glu-UL	ENSG00000166130	IKBIP	12	rs7138837	98621843	T	C	0.376866	0.147064	0.0278001	1.14074e-06	0.00100495	0.00807904	FALSE
Glu-UL	ENSG00000120800	UTP20	12	rs12423681	100961954	A	C	0.134328	-0.149343	0.0259063	1.66008e-07	0.000203876	0.0021263	FALSE
Glu-UL	ENSG00000075188	NUP37	12	rs4517577	101948704	A	G	0.175373	0.254054	0.0552662	1.67631e-05	0.0071645	0.0397121	FALSE
Glu-UL	ENSG00000171759	PAH	12	rs34631206	102956689	G	C	0.373134	0.356633	0.0524843	2.13107e-09	4.51083e-06	7.33134e-05	FALSE
Glu-UL	ENSG00000257681		12	rs10861099	103781797	A	G	0.406716	0.229066	0.0362734	1.66118e-08	2.49631e-05	0.000339796	FALSE
Glu-UL	ENSG00000139372	TDG	12	rs11111852	103938126	G	A	0.507463	-0.0961351	0.0194994	4.70265e-06	0.00410476	0.0257434	FALSE
Glu-UL	ENSG00000120820	GLT8D2	12	rs118009294	104064302	A	G	0.0597015	0.33951	0.0679211	3.6044e-06	0.00292973	0.0196693	TRUE
Glu-UL	ENSG00000235162	C12orf75	12	rs10778353	104820090	C	T	0.0858209	0.263514	0.0524174	3.22314e-06	0.00238824	0.0165829	FALSE
Glu-UL	ENSG00000136044	APPL2	12	rs1196754	105208898	C	A	0.847015	-0.116445	0.0191799	4.64192e-08	7.02175e-05	0.000859309	FALSE
Glu-UL	ENSG00000295957		12	rs10861553	106059036	G	T	0.503731	-0.527856	0.0480447	2.33512e-17	4.03249e-13	2.84601e-11	FALSE
Glu-UL	ENSG00000257890		12	rs10861553	106059036	G	T	0.503731	-0.27638	0.0392393	7.27207e-10	1.89224e-06	3.3502e-05	FALSE
Glu-UL	ENSG00000151135	TMEM263	12	rs4479083	106927467	G	C	0.44403	-0.189812	0.0415539	1.86911e-05	0.00858167	0.0457383	FALSE
Glu-UL	ENSG00000075035	WSCD2	12	rs11113781	108239872	C	A	0.473881	-0.223396	0.0423245	1.19612e-06	0.00148414	0.0111812	FALSE
Glu-UL	ENSG00000111229	ARPC3	12	rs1106724	110636898	A	C	0.253731	0.152382	0.0292065	1.52358e-06	0.000357263	0.00345017	FALSE
Glu-UL	ENSG00000204852	TCTN1	12	rs10849900	110537085	T	C	0.264925	0.0988458	0.0214045	1.54882e-05	0.00309924	0.0205504	FALSE
Glu-UL	ENSG00000089022	MAPKAPK5	12	rs2239194	111445975	C	T	0.0671642	-0.166301	0.0344654	7.05051e-06	0.000940983	0.00767705	FALSE
Glu-UL	ENSG00000111300	NAA25	12	rs11066322	112484725	G	A	0.272388	0.0735754	0.0169037	4.13961e-05	0.00395851	0.0249429	FALSE
Glu-UL	ENSG00000151176	PLBD2	12	rs12825284	113358594	T	C	0.160448	-0.279109	0.0336793	3.10073e-12	1.07768e-08	3.27571e-07	TRUE
Glu-UL	ENSG00000176834	VSIG10	12	rs71452642	118265245	C	T	0.100746	-0.317576	0.0375418	1.4512e-12	4.62167e-09	1.49288e-07	FALSE
Glu-UL	ENSG00000111780		12	rs1671769	120510998	C	T	0.30597	0.162371	0.0338089	7.68684e-06	0.0044956	0.0275245	FALSE
Glu-UL	ENSG00000157782	CABP1	12	rs569499	120656307	T	C	0.597015	-0.166253	0.0345432	7.38955e-06	0.00478595	0.0288058	FALSE
Glu-UL	ENSG00000157837	SPPL3	12	rs586305	120768252	T	A	0.738806	-0.0742717	0.0127424	1.27472e-07	0.000167406	0.00181197	FALSE
Glu-UL	ENSG00000308932		12	rs10849861	121237504	G	A	0.145522	0.334941	0.0643835	1.61767e-06	0.00147025	0.0110987	FALSE
Glu-UL	ENSG00000135124	P2RX4	12	rs25644	121228843	A	G	0.134328	0.230712	0.0394204	1.1546e-07	0.000141666	0.00156963	FALSE
Glu-UL	ENSG00000295862		12	rs28360463	121209521	C	A	0.156716	0.481942	0.0522266	4.89228e-14	5.06978e-10	1.97133e-08	FALSE
Glu-UL	ENSG00000139725	RHOF	12	rs2122266	121825909	C	G	0.246269	-0.188753	0.0392364	7.45379e-06	0.00342454	0.0222576	FALSE
Glu-UL	ENSG00000158023	CFAP251	12	rs77405015	122040964	T	C	0.324627	0.12538	0.0251573	3.81749e-06	0.00179289	0.0131581	FALSE
Glu-UL	ENSG00000130921	MTRFR	12	rs28768122	123401427	T	C	0.746269	-0.17573	0.0233634	9.02188e-11	2.40685e-07	5.34498e-06	FALSE
Glu-UL	ENSG00000111364	DDX55	12	rs786450	123587218	C	A	0.88806	0.194917	0.031639	3.18815e-08	2.53297e-05	0.000344332	FALSE
Glu-UL	ENSG00000197653	DNAH10	12	rs11057353	123781140	T	C	0.619403	0.293389	0.0541516	6.82938e-07	0.000508405	0.00460345	TRUE
Glu-UL	ENSG00000119242	CCDC92	12	rs11057393	123919222	C	T	0.33209	0.0583427	0.0123535	1.04244e-05	0.00691564	0.0387074	TRUE
Glu-UL	ENSG00000178882	RFLNA	12	rs10773054	124096703	T	A	0.347015	0.0808637	0.016338	4.36415e-06	0.0036862	0.0236657	FALSE
Glu-UL	ENSG00000178882	RFLNA	12	rs10773054	124096703	T	A	0.347015	0.0808637	0.016338	4.36415e-06	0.0036862	0.0236657	FALSE
Glu-UL	ENSG00000139364	TMEM132B	12	rs4237992	125172181	C	T	0.223881	-0.14598	0.0290586	3.2685e-06	0.00372963	0.0238798	TRUE
Glu-UL	ENSG00000249345	LINC02405	12	rs10773368	127161508	G	A	0.619403	-0.196811	0.0394884	3.81481e-06	0.00434501	0.0268579	FALSE
Glu-UL	ENSG00000249345	LINC02405	12	rs10773368	127161508	G	A	0.619403	-0.196811	0.0394884	3.81481e-06	0.00434501	0.0268579	FALSE
Glu-UL	ENSG00000151948	GLT1D1	12	rs41375244	128825031	T	G	0.0858209	-0.185983	0.0349036	9.78264e-07	0.00159778	0.0119045	FALSE
Glu-UL	ENSG00000249926		12	rs56991427	131688225	C	G	0.302239	0.641405	0.0753097	1.12518e-12	6.03325e-09	1.91877e-07	FALSE
Glu-UL	ENSG00000185163	DDX51	12	rs7134173	132101614	C	G	0.242537	-0.190839	0.0304235	1.98657e-08	3.92534e-05	0.000510702	FALSE
Glu-UL	ENSG00000072609	CHFR	12	rs10870571	133031362	A	T	0.615672	-0.0578727	0.0123231	1.15255e-05	0.00706139	0.0392885	FALSE
Glu-UL	ENSG00000090612	ZNF268	12	rs7956681	133055423	A	G	0.175373	-0.142887	0.0302065	1.01284e-05	0.00409456	0.0256951	FALSE
Glu-UL	ENSG00000132958	TPTE2	13	rs2290812	19675281	C	T	0.100746	-0.397596	0.0518429	4.71943e-11	4.70316e-07	9.87016e-06	FALSE
Glu-UL	ENSG00000032742	IFT88	13	rs11618165	20567343	G	A	0.451493	-0.150752	0.0189016	1.22562e-11	5.18323e-08	1.37299e-06	TRUE
Glu-UL	ENSG00000172458	IL17D	13	rs9509436	20918258	G	C	0.425373	-0.164011	0.0278057	9.5459e-08	0.00012373	0.00139644	FALSE
Glu-UL	ENSG00000150457	LATS2	13	rs9509507	21050242	C	T	0.619403	-0.245545	0.0483004	2.58331e-06	0.00191644	0.0138871	FALSE
Glu-UL	ENSG00000180776	ZDHHC20	13	rs9509682	21399300	G	A	0.272388	0.0886275	0.0127008	9.65488e-10	3.01462e-06	5.1161e-05	FALSE
Glu-UL	ENSG00000262198		13	rs7325475	22884776	A	G	0.30597	0.684973	0.097657	8.26121e-10	4.88095e-06	7.84625e-05	FALSE
Glu-UL	ENSG00000289217		13	rs9550884	22928661	C	T	0.503731	0.332688	0.0593436	3.18254e-07	0.000639969	0.00555551	FALSE
Glu-UL	ENSG00000102683	SGCG	13	rs642316	23158979	G	A	0.66791	-0.435086	0.0825386	1.2294e-06	0.00213418	0.0151349	FALSE
Glu-UL	ENSG00000232977	LINC00327	13	rs17078708	23394905	T	C	0.0485075	0.666894	0.130879	2.46607e-06	0.00367827	0.0236295	FALSE
Glu-UL	ENSG00000182957	SPATA13	13	rs150888987	23785202	C	T	0.0447761	0.348603	0.0670155	1.62065e-06	0.00182809	0.0133407	FALSE
Glu-UL	ENSG00000291041		13	rs3930889	24990144	A	G	0.473881	0.291354	0.0352343	3.36033e-12	1.54732e-08	4.52952e-07	FALSE
Glu-UL	ENSG00000299115		13	rs7989004	27977220	C	G	0.298507	0.207477	0.0447028	1.41897e-05	0.00925447	0.0485734	FALSE
Glu-UL	ENSG00000289569		13	rs9314915	28637034	G	C	0.220149	0.166929	0.0354187	1.08169e-05	0.00708309	0.0393667	FALSE
Glu-UL	ENSG00000309792		13	rs202108	30311806	A	G	0.660448	0.181597	0.0262987	1.32424e-09	4.11829e-06	6.76808e-05	FALSE
Glu-UL	ENSG00000102781	KATNAL1	13	rs6490453	30307436	T	C	0.432836	-0.0855963	0.0163033	1.33702e-06	0.00175475	0.0129337	TRUE
Glu-UL	ENSG00000244754	N4BP2L2	13	rs2010997	32496369	G	A	0.402985	-0.0660486	0.0113628	1.36188e-07	0.000121319	0.00137373	FALSE
Glu-UL	ENSG00000133119	RFC3	13	rs296899	33815137	T	C	0.0858209	-0.325868	0.0489359	3.82575e-09	4.33837e-06	7.08457e-05	FALSE
Glu-UL	ENSG00000310293		13	rs9545247	35753537	G	A	0.238806	0.430548	0.0621934	1.22733e-09	2.58622e-06	4.44892e-05	FALSE
Glu-UL	ENSG00000120669	SOHLH2	13	rs1998799	36283363	A	C	0.313433	0.662506	0.0529334	3.80029e-20	1.17704e-15	1.5114e-13	FALSE
Glu-UL	ENSG00000242715	CCDC169	13	rs2281865	36297627	G	A	0.33209	0.261562	0.0468139	3.43721e-07	0.000285607	0.0028462	TRUE
Glu-UL	ENSG00000133104	SPART	13	rs9575979	36355849	C	A	0.324627	-0.116461	0.0237926	5.39106e-06	0.00380181	0.0242268	FALSE
Glu-UL	ENSG00000120693	SMAD9	13	rs9566169	36918335	G	A	0.201493	0.440047	0.0355496	6.6964e-20	1.06463e-15	1.40644e-13	TRUE
Glu-UL	ENSG00000023516	AKAP11	13	rs875008	42268562	A	G	0.227612	-0.0872385	0.0180005	6.49678e-06	0.00384725	0.0244559	FALSE
Glu-UL	ENSG00000151773	CCDC122	13	rs2875541	43843305	G	T	0.440298	-0.381432	0.0547609	1.02021e-09	1.90765e-06	3.37168e-05	FALSE
Glu-UL	ENSG00000273149		13	rs9316127	45312968	A	C	0.350746	-0.364234	0.0474573	4.60182e-11	1.06427e-07	2.59256e-06	FALSE
Glu-UL	ENSG00000136146	MED4	13	rs61972227	47917898	G	C	0.0597015	0.256157	0.0328457	2.66993e-11	8.65496e-08	2.12847e-06	FALSE
Glu-UL	ENSG00000136144	RCBTB1	13	rs1359541	49584803	A	G	0.570895	0.229509	0.0236078	5.59814e-15	1.22524e-10	5.32707e-09	TRUE
Glu-UL	ENSG00000123179	EBPL	13	rs9568308	49691102	C	T	0.115672	-0.393753	0.0529152	1.28302e-10	6.4596e-07	1.30257e-05	TRUE
Glu-UL	ENSG00000295839		13	rs139800603	49936607	C	G	0.0485075	0.902866	0.0761483	5.86604e-19	4.34978e-14	3.67387e-12	TRUE
Glu-UL	ENSG00000150510	FAM124A	13	rs2408300	51227222	C	G	0.757463	0.176414	0.0236644	1.2089e-10	3.24603e-07	7.08641e-06	FALSE
Glu-UL	ENSG00000281106	TMEM272	13	rs2282057	51937470	G	A	0.597015	0.189322	0.0381538	4.15483e-06	0.0017066	0.0126059	FALSE
Glu-UL	ENSG00000136110	CNMD	13	rs2214422	52764655	T	G	0.63806	0.275759	0.0507302	6.35459e-07	0.000411428	0.00386811	FALSE
Glu-UL	ENSG00000287460		13	rs12865394	54572469	T	C	0.675373	0.644271	0.141744	2.03318e-05	0.00922368	0.0485161	FALSE
Glu-UL	ENSG00000188243	COMMD6	13	rs3812844	75549320	C	T	0.537313	0.252459	0.0396134	1.29824e-08	2.54017e-05	0.000344855	TRUE
Glu-UL	ENSG00000285902		13	rs9530925	79492641	T	C	0.623134	-0.619387	0.0584804	1.27677e-16	2.04186e-12	1.28291e-10	FALSE
Glu-UL	ENSG00000229175	LINC00382	13	rs2783125	79583755	G	A	0.373134	0.387419	0.048565	1.21653e-11	4.52239e-08	1.21354e-06	FALSE
Glu-UL	ENSG00000288016		13	rs9546610	84113778	A	T	0.0671642	-0.804281	0.141513	2.31923e-07	0.000161387	0.00175976	FALSE
Glu-UL	ENSG00000080166	DCT	13	rs17196022	94142482	T	G	0.19403	-0.240457	0.0507181	9.72354e-06	0.009471	0.0493385	FALSE
Glu-UL	ENSG00000125257	ABCC4	13	rs35218761	95373516	A	G	0.231343	0.193135	0.0331994	1.33561e-07	0.000176919	0.00189897	FALSE
Glu-UL	ENSG00000296764		13	rs9554919	102984510	C	T	0.38806	-0.435821	0.0561167	3.07993e-11	7.55666e-08	1.90381e-06	FALSE
Glu-UL	ENSG00000285789		13	rs9300776	103009334	C	T	0.436567	-0.312271	0.055904	3.4573e-07	0.000383467	0.00365526	FALSE
Glu-UL	ENSG00000302562		13	rs7320879	103013494	T	C	0.58209	-0.277296	0.0493338	2.99731e-07	0.000491974	0.00449417	FALSE
Glu-UL	ENSG00000068650	ATP11A	13	rs34658917	112763109	C	T	0.0858209	-0.14776	0.0304711	6.42927e-06	0.00663245	0.0374684	FALSE
Glu-UL	ENSG00000303208		13	rs425329	112742500	A	G	0.0634328	-0.467951	0.0900645	1.66024e-06	0.00160724	0.0119663	FALSE
Glu-UL	ENSG00000126217	MCF2L	13	rs75114025	112541098	T	A	0.0634328	-0.137872	0.0267599	1.9724e-06	0.0017954	0.0131581	FALSE
Glu-UL	ENSG00000139835	GRTP1	13	rs4907618	113360700	A	G	0.485075	0.288779	0.0342828	1.6999e-12	8.04302e-09	2.47395e-07	FALSE
Glu-UL	ENSG00000184497	TMEM255B	13	rs9577556	113461847	A	G	0.141791	0.315854	0.0634758	3.9363e-06	0.0031182	0.0206098	FALSE
Glu-UL	ENSG00000185989	RASA3	13	rs7328820	114135190	C	T	0.757463	0.136904	0.0231928	9.37236e-08	0.000100599	0.0011812	FALSE
Glu-UL	ENSG00000129484	PARP2	14	rs878157	20356854	C	T	0.242537	0.167789	0.0286716	1.15699e-07	0.000207577	0.00215184	FALSE
Glu-UL	ENSG00000092094	OSGEP	14	rs2275006	20452181	A	G	0.548507	0.224563	0.0206273	3.58488e-17	4.29198e-13	2.98821e-11	FALSE
Glu-UL	ENSG00000100804	PSMB5	14	rs8013143	23025068	A	G	0.328358	-0.419135	0.0323734	6.52382e-21	1.567e-16	2.37453e-14	TRUE
Glu-UL	ENSG00000285467	DHRS4L1	14	rs2984817	23956218	C	G	0.0820896	0.59271	0.119639	4.28471e-06	0.0032412	0.0212609	TRUE
Glu-UL	ENSG00000291039	DHRS4L1	14	rs2984817	23956218	C	G	0.0820896	0.59271	0.119639	4.28471e-06	0.00319015	0.0210045	TRUE
Glu-UL	ENSG00000254692		14	rs8007272	24209082	A	G	0.104478	-0.303219	0.038898	2.71225e-11	1.24834e-07	2.95204e-06	FALSE
Glu-UL	ENSG00000092108	SCFD1	14	rs229231	30608655	G	A	0.395522	0.0657151	0.0142838	1.65294e-05	0.00798916	0.0432592	TRUE
Glu-UL	ENSG00000258558		14	rs8015095	30873965	T	G	0.253731	0.27444	0.0554228	4.32496e-06	0.00227514	0.0159844	TRUE
Glu-UL	ENSG00000100473	COCH	14	rs35433064	30858807	G	A	0.149254	0.285669	0.0628748	2.04741e-05	0.00866231	0.0461148	FALSE
Glu-UL	ENSG00000198604	BAZ1A	14	rs112973730	34756614	C	T	0.100746	-0.223921	0.0316685	6.45789e-10	2.18299e-06	3.82273e-05	FALSE
Glu-UL	ENSG00000151338	MIPOL1	14	rs12884173	37097839	G	A	0.891791	-0.195107	0.0283477	1.45992e-09	1.76786e-06	3.15709e-05	FALSE
Glu-UL	ENSG00000258526		14	rs718364	39440343	C	T	0.682836	0.234059	0.0233155	1.40196e-15	3.79675e-11	1.80403e-09	FALSE
Glu-UL	ENSG00000286123		14	rs10131093	40164758	T	C	0.0522388	0.908352	0.169108	8.23505e-07	0.000685644	0.00589244	FALSE
Glu-UL	ENSG00000197776	KLHDC1	14	rs34410594	49729655	T	G	0.190299	0.278769	0.039718	8.09682e-10	1.49841e-06	2.74245e-05	FALSE
Glu-UL	ENSG00000100504	PYGL	14	rs12434339	50987594	C	T	0.227612	0.350828	0.058088	5.29962e-08	9.35817e-05	0.00111324	FALSE
Glu-UL	ENSG00000258711		14	rs11627694	50977250	C	T	0.0410448	0.701933	0.119366	1.02842e-07	0.000179107	0.00191847	FALSE
Glu-UL	ENSG00000304191		14	rs61984158	51250693	G	A	0.164179	-0.546456	0.0522367	2.2407e-16	5.95716e-12	3.31805e-10	FALSE
Glu-UL	ENSG00000131966	ACTR10	14	rs1028460	57980069	A	T	0.376866	0.059988	0.0127731	1.15186e-05	0.00674906	0.0379814	FALSE
Glu-UL	ENSG00000126790	L3HYPDH	14	rs8660	59473009	T	C	0.44403	0.151868	0.0272202	3.55132e-07	0.000337557	0.00328139	FALSE
Glu-UL	ENSG00000070182	SPTB	14	rs8009510	64884620	T	G	0.876866	-0.219211	0.0388722	2.77922e-07	0.00033123	0.00323208	FALSE
Glu-UL	ENSG00000258289	CHURC1	14	rs8943	64932545	A	G	0.242537	-0.192937	0.0268827	4.06809e-10	1.53355e-06	2.79189e-05	FALSE
Glu-UL	ENSG00000303604		14	rs9323528	69559943	C	T	0.712687	-0.163701	0.0330286	4.24844e-06	0.00315893	0.0208389	TRUE
Glu-UL	ENSG00000257759		14	rs1962312	70595718	C	T	0.208955	-0.244653	0.0379919	9.78234e-09	1.6389e-05	0.000233254	FALSE
Glu-UL	ENSG00000100731	PCNX1	14	rs2526859	70945490	C	T	0.589552	0.0516088	0.00965279	9.10062e-07	0.000677239	0.00582993	FALSE
Glu-UL	ENSG00000133961	NUMB	14	rs3742825	73238768	G	A	0.242537	-0.0632046	0.0117559	8.07061e-07	0.000509684	0.00461098	TRUE
Glu-UL	ENSG00000133961	NUMB	14	rs3742825	73238768	G	A	0.242537	-0.0632046	0.0117559	8.07061e-07	0.000509684	0.00461098	TRUE
Glu-UL	ENSG00000140043	PTGR2	14	rs113908782	73848941	A	T	0.526119	0.410763	0.0408063	1.2444e-15	2.91103e-11	1.44211e-09	FALSE
Glu-UL	ENSG00000119725	ZNF410	14	rs7146634	73946426	C	G	0.429104	0.101207	0.0190627	1.05682e-06	0.00114461	0.00894867	FALSE
Glu-UL	ENSG00000258891		14	rs11624332	74049018	A	C	0.0708955	0.241558	0.0504727	8.19425e-06	0.00427252	0.0265051	FALSE
Glu-UL	ENSG00000258454		14	rs3783997	76172123	A	G	0.634328	0.295293	0.0436672	2.45336e-09	4.27582e-06	7.00463e-05	FALSE
Glu-UL	ENSG00000119715	ESRRB	14	rs1900127	76196103	C	T	0.619403	0.399458	0.0437378	7.42895e-14	7.77412e-10	2.9343e-08	FALSE
Glu-UL	ENSG00000286437		14	rs72737523	76792857	C	T	0.115672	0.68888	0.0926589	1.32084e-10	3.75501e-07	8.07778e-06	FALSE
Glu-UL	ENSG00000100629	CEP128	14	rs1025253	80922922	G	A	0.649254	-0.11841	0.0183109	8.71837e-09	1.16433e-05	0.000172238	FALSE
Glu-UL	ENSG00000284959		14	rs61980899	81210500	T	C	0.492537	0.138713	0.0256594	7.16761e-07	0.000558744	0.0049505	FALSE
Glu-UL	ENSG00000054983	GALC	14	rs112469201	87976772	G	A	0.186567	-0.357096	0.0290013	8.77025e-20	1.8808e-14	1.71507e-12	FALSE
Glu-UL	ENSG00000042317	SPATA7	14	rs35823815	88361089	G	A	0.179104	0.282611	0.027173	2.91397e-16	4.72648e-12	2.70571e-10	FALSE
Glu-UL	ENSG00000258983		14	rs57287698	88448387	T	C	0.257463	0.65511	0.0604596	4.46512e-17	9.7677e-13	6.41075e-11	FALSE
Glu-UL	ENSG00000198668	CALM1	14	rs55983245	90662486	T	C	0.526119	0.0959906	0.0195413	5.04165e-06	0.00539769	0.0316084	FALSE
Glu-UL	ENSG00000133962	CATSPERB	14	rs57035593	91801752	C	T	0.320896	0.433567	0.0774437	3.28351e-07	0.000364458	0.00351306	FALSE
Glu-UL	ENSG00000165929	TC2N	14	rs11160026	91760130	G	T	0.406716	0.621984	0.0824445	8.16745e-11	2.62628e-07	5.80726e-06	FALSE
Glu-UL	ENSG00000011114	BTBD7	14	rs8012763	93555565	G	A	0.320896	-0.0748146	0.0154166	6.33868e-06	0.00411274	0.0257777	FALSE
Glu-UL	ENSG00000176438	SYNE3	14	rs11160254	95527258	A	G	0.421642	0.434988	0.0564101	3.9252e-11	1.3215e-07	3.10581e-06	TRUE
Glu-UL	ENSG00000258702		14	rs75564413	96593254	G	A	0.115672	-0.366419	0.0615693	7.66139e-08	0.000114481	0.00130905	TRUE
Glu-UL	ENSG00000182218	HHIPL1	14	rs12891978	99610602	A	C	0.686567	0.211992	0.0310082	1.78083e-09	2.77006e-06	4.73356e-05	FALSE
Glu-UL	ENSG00000140105	WARS1	14	rs4905957	100370893	C	T	0.761194	-0.140864	0.024114	1.20848e-07	0.000214824	0.00221803	FALSE
Glu-UL	ENSG00000196663	TECPR2	14	rs1005776	102430336	A	G	0.69403	0.0662843	0.0141944	1.27428e-05	0.00703505	0.0392332	FALSE
Glu-UL	ENSG00000131323	TRAF3	14	rs7158166	102775462	T	C	0.559702	-0.114956	0.0237417	6.6101e-06	0.0045806	0.0278793	FALSE
Glu-UL	ENSG00000075413	MARK3	14	rs3759579	103384935	A	G	0.518657	-0.0771084	0.0103069	1.07668e-10	2.69953e-07	5.94372e-06	TRUE
Glu-UL	ENSG00000184990	SIVA1	14	rs4983541	104742649	G	A	0.164179	-0.330799	0.0383428	6.90842e-13	4.09157e-09	1.35564e-07	FALSE
Glu-UL	ENSG00000258593		14	rs28427389	104871466	C	T	0.55597	-0.27179	0.0456887	7.74436e-08	9.24158e-05	0.00110089	FALSE
Glu-UL	ENSG00000294960		14	rs2304758	104877981	G	A	0.507463	-0.402939	0.0727304	4.16359e-07	0.000466063	0.00429555	FALSE
Glu-UL	ENSG00000185567	AHNAK2	14	rs10137166	104958095	G	C	0.488806	-0.160668	0.0302422	1.04205e-06	0.000956555	0.0077856	FALSE
Glu-UL	ENSG00000307120		14	rs8007509	105113846	A	G	0.869403	-0.361907	0.0498921	2.91074e-10	6.26698e-07	1.26643e-05	FALSE
Glu-UL	ENSG00000299052		14	rs11624007	105525846	A	C	0.253731	0.425904	0.0503034	1.40433e-12	1.86395e-09	6.62295e-08	FALSE
Glu-UL	ENSG00000259905	PWRN1	15	rs117354672	24563492	G	A	0.0746269	-0.699401	0.136155	2.09615e-06	0.00164864	0.0122303	FALSE
Glu-UL	ENSG00000259905	PWRN1	15	rs117354672	24563492	G	A	0.0746269	-0.699401	0.136155	2.09615e-06	0.00164864	0.0122303	FALSE
Glu-UL	ENSG00000291082	HERC2P9	15	rs8036234	28716985	G	A	0.123134	-0.39613	0.0578408	1.69102e-09	2.24853e-06	3.91375e-05	FALSE
Glu-UL	ENSG00000198690	FAN1	15	rs7171208	30906726	A	G	0.597015	0.128769	0.0235928	5.80979e-07	0.00046775	0.00430725	FALSE
Glu-UL	ENSG00000166912	MTMR10	15	rs8032942	30952972	C	T	0.33209	0.304568	0.030177	1.10856e-15	1.98169e-11	1.00097e-09	FALSE
Glu-UL	ENSG00000166922	SCG5	15	rs11635997	32641892	G	A	0.533582	0.258312	0.0302596	1.03171e-12	8.01628e-09	2.47341e-07	TRUE
Glu-UL	ENSG00000259408		15	rs11638109	34035458	C	T	0.149254	-0.286628	0.0498014	1.72511e-07	0.000317398	0.00311777	FALSE
Glu-UL	ENSG00000169857	AVEN	15	rs2702306	34035834	G	A	0.608209	0.216393	0.0228914	1.81875e-14	3.08502e-10	1.23212e-08	FALSE
Glu-UL	ENSG00000215252	GOLGA8B	15	rs4924045	34585308	C	T	0.11194	-0.365645	0.063061	1.44564e-07	0.000141905	0.0015706	FALSE
Glu-UL	ENSG00000296959		15	rs12595519	36773736	G	A	0.0634328	0.525909	0.109489	7.66619e-06	0.00682692	0.0383538	FALSE
Glu-UL	ENSG00000259280		15	rs16964235	36881178	T	C	0.410448	0.223906	0.0459301	5.82216e-06	0.00523645	0.0309026	FALSE
Glu-UL	ENSG00000128944	KNSTRN	15	rs17671250	40380923	T	C	0.104478	0.277861	0.0598357	1.40581e-05	0.00773973	0.0422864	FALSE
Glu-UL	ENSG00000128891	CCDC32	15	rs12913296	40552023	G	A	0.477612	-0.310719	0.0248347	3.86845e-20	9.59022e-16	1.28338e-13	FALSE
Glu-UL	ENSG00000243708	PLA2G4B	15	rs890498	41819100	C	G	0.335821	0.191634	0.0309808	2.87049e-08	3.87211e-05	0.000505794	FALSE
Glu-UL	ENSG00000285942		15	rs60584955	42526683	G	A	0.0597015	-0.281773	0.0418093	2.70761e-09	4.10916e-06	6.76385e-05	FALSE
Glu-UL	ENSG00000285080		15	rs2899077	43217827	A	G	0.160448	-0.386944	0.0370144	2.31246e-16	1.69683e-12	1.07929e-10	FALSE
Glu-UL	ENSG00000285117		15	rs540587	43185915	G	C	0.839552	0.357903	0.0508733	7.53738e-10	5.62999e-07	1.16492e-05	TRUE
Glu-UL	ENSG00000166762	CATSPER2	15	rs4997480	43719842	C	T	0.123134	-0.316764	0.0519409	4.13961e-08	1.49753e-05	0.000214616	FALSE
Glu-UL	ENSG00000104131	EIF3J	15	rs8023560	44779884	G	T	0.865672	-0.114694	0.0238774	7.66259e-06	0.00207266	0.0148189	FALSE
Glu-UL	ENSG00000185880	TRIM69	15	rs17588305	44729568	C	T	0.130597	-0.620221	0.0451764	2.82695e-22	2.43384e-17	4.3998e-15	TRUE
Glu-UL	ENSG00000166262	FAM227B	15	rs147081350	49503240	G	C	0.0559702	0.439165	0.092547	9.56725e-06	0.00455087	0.0277639	FALSE
Glu-UL	ENSG00000104047	DTWD1	15	rs3098614	49178673	C	T	0.261194	-0.144189	0.0279604	1.93609e-06	0.00117321	0.00913176	FALSE
Glu-UL	ENSG00000273674		15	rs2574755	50835644	T	C	0.529851	0.284843	0.0341802	2.52766e-12	2.18307e-08	6.21404e-07	FALSE
Glu-UL	ENSG00000259240	MIR4713HG	15	rs4774589	51437976	T	C	0.511194	0.215711	0.0453249	9.0736e-06	0.00426679	0.0265051	FALSE
Glu-UL	ENSG00000186417	GLDN	15	rs1902585	51321709	C	G	0.518657	-0.227421	0.048799	1.32038e-05	0.00581909	0.0338158	FALSE
Glu-UL	ENSG00000259556		15	rs8027721	51775670	G	C	0.395522	-0.361134	0.0362202	1.88815e-15	2.4917e-11	1.24034e-09	FALSE
Glu-UL	ENSG00000305995		15	rs2554348	51907155	C	G	0.429104	-0.18723	0.041316	2.13938e-05	0.0074367	0.0408689	FALSE
Glu-UL	ENSG00000069956	MAPK6	15	rs17612102	51971897	T	C	0.619403	0.110176	0.0144548	5.8041e-11	1.83064e-07	4.15493e-06	TRUE
Glu-UL	ENSG00000069943	PIGB	15	rs28852495	55305196	C	T	0.406716	0.195507	0.0348787	3.19263e-07	0.000481036	0.00441382	FALSE
Glu-UL	ENSG00000069974	RAB27A	15	rs11639453	55293924	A	G	0.115672	0.267006	0.0389251	1.61341e-09	4.04062e-06	6.66168e-05	FALSE
Glu-UL	ENSG00000171016	PYGO1	15	rs8029097	56076926	C	T	0.529851	0.0682004	0.014644	1.33606e-05	0.00949011	0.049413	TRUE
Glu-UL	ENSG00000259564		15	rs34190274	61338607	A	G	0.0559702	-0.4542	0.0890207	2.40221e-06	0.00241817	0.0167343	FALSE
Glu-UL	ENSG00000171914	TLN2	15	rs955529	62589665	A	T	0.313433	0.0957713	0.0155008	2.95768e-08	5.02217e-05	0.000634965	FALSE
Glu-UL	ENSG00000185088	RPS27L	15	rs7172351	63144848	C	T	0.115672	-0.299868	0.0557284	7.92751e-07	0.000890925	0.00735012	FALSE
Glu-UL	ENSG00000166128	RAB8B	15	rs2068143	63296463	G	A	0.328358	0.0800133	0.0168009	8.96246e-06	0.00725559	0.0400232	FALSE
Glu-UL	ENSG00000166839	ANKDD1A	15	rs11071820	64912086	G	T	0.36194	0.205207	0.0264282	3.10221e-11	6.19008e-08	1.58273e-06	TRUE
Glu-UL	ENSG00000274383		15	rs8024697	65015150	G	T	0.451493	0.422905	0.0671465	1.78337e-08	1.42885e-05	0.000206497	FALSE
Glu-UL	ENSG00000103742	IGDCC4	15	rs669345	65425479	C	A	0.0447761	-0.279235	0.0624427	2.6711e-05	0.00719862	0.0398369	FALSE
Glu-UL	ENSG00000166938	DIS3L	15	rs4776774	66280354	A	G	0.0634328	0.567116	0.0431243	2.85754e-21	1.71584e-16	2.56239e-14	FALSE
Glu-UL	ENSG00000260773		15	rs193201237	66366779	A	G	0.0746269	0.513257	0.101555	2.90292e-06	0.00360324	0.0231866	FALSE
Glu-UL	ENSG00000075131	TIPIN	15	rs34340636	66513822	G	T	0.0820896	0.334184	0.0582782	1.882e-07	0.000260755	0.0026524	FALSE
Glu-UL	ENSG00000137764	MAP2K5	15	rs4776361	67469718	G	A	0.235075	-0.0978646	0.0146031	3.18653e-09	5.7316e-06	9.01675e-05	FALSE
Glu-UL	ENSG00000188779	SKOR1	15	rs4776361	67469718	G	A	0.235075	-0.244272	0.0524184	1.3219e-05	0.00455528	0.0277744	FALSE
Glu-UL	ENSG00000129007	CALML4	15	rs71400388	68162142	A	C	0.186567	-0.145366	0.029824	5.84025e-06	0.00418518	0.0261682	FALSE
Glu-UL	ENSG00000303631		15	rs12910681	70988999	G	T	0.828358	-0.256883	0.0466166	4.69561e-07	0.000555399	0.00492977	FALSE
Glu-UL	ENSG00000198794	SCAMP5	15	rs35406858	74987328	C	G	0.13806	-0.091692	0.0188395	6.00232e-06	0.00208506	0.0148685	FALSE
Glu-UL	ENSG00000138621	PPCDC	15	rs78404800	74998371	C	T	0.0746269	0.329006	0.037074	2.3235e-13	8.62157e-10	3.2305e-08	FALSE
Glu-UL	ENSG00000140400	MAN2C1	15	rs9920034	75635681	A	T	0.291045	0.112307	0.0233717	7.60936e-06	0.00242499	0.0167608	FALSE
Glu-UL	ENSG00000169371	SNUPN	15	rs113916006	75522552	C	T	0.227612	-0.145007	0.0270487	8.58842e-07	0.000582925	0.00512072	FALSE
Glu-UL	ENSG00000140367	UBE2Q2	15	rs2047866	75843853	C	T	0.421642	0.138235	0.0174217	1.46815e-11	5.8073e-08	1.49599e-06	TRUE
Glu-UL	ENSG00000140386	SCAPER	15	rs2896954	76559351	C	A	0.514925	-0.0722036	0.0105021	1.50768e-09	1.96251e-06	3.46269e-05	FALSE
Glu-UL	ENSG00000259420		15	rs62009067	77520745	A	C	0.291045	0.156803	0.0310815	3.00775e-06	0.00201409	0.0144726	FALSE
Glu-UL	ENSG00000167202	TBC1D2B	15	rs4473152	78089318	C	G	0.302239	-0.101576	0.0184144	4.59086e-07	0.000555926	0.00492977	FALSE
Glu-UL	ENSG00000169684	CHRNA5	15	rs2869055	78530046	G	C	0.55597	-0.402044	0.0351059	3.21982e-18	1.02647e-13	8.01288e-12	FALSE
Glu-UL	ENSG00000185787	MORF4L1	15	rs61393924	78810638	G	C	0.261194	-0.100034	0.0162222	3.11106e-08	4.44663e-05	0.000570599	TRUE
Glu-UL	ENSG00000166557	TMED3	15	rs3784545	79315535	A	G	0.328358	-0.115281	0.0227712	2.80654e-06	0.00282713	0.0191151	TRUE
Glu-UL	ENSG00000188659	SAXO2	15	rs778808130	82313958	G	C	0.0485075	1.33806	0.0919331	1.1164e-23	3.47594e-18	7.95932e-16	FALSE
Glu-UL	ENSG00000278662	GOLGA6L10	15	rs62012709	82532886	C	A	0.220149	-0.802341	0.0685362	1.10033e-18	5.741e-14	4.73253e-12	FALSE
Glu-UL	ENSG00000278662	GOLGA6L10	15	rs62012709	82532886	C	A	0.220149	-0.802341	0.0685362	1.10033e-18	5.741e-14	4.73253e-12	FALSE
Glu-UL	ENSG00000278662	GOLGA6L10	15	rs62012709	82532886	C	A	0.220149	-0.802341	0.0685362	1.10033e-18	5.741e-14	4.73253e-12	FALSE
Glu-UL	ENSG00000290945		15	rs35161637	82377611	A	G	0.0858209	-0.3342	0.042211	1.58429e-11	5.3255e-08	1.40191e-06	FALSE
Glu-UL	ENSG00000290947		15	rs202018351	82403156	A	G	0.350746	0.277829	0.0517882	8.46011e-07	0.000555834	0.00492977	FALSE
Glu-UL	ENSG00000290948		15	rs4778988	82247996	T	C	0.313433	-0.31963	0.0468136	1.85081e-09	3.55867e-06	5.95283e-05	FALSE
Glu-UL	ENSG00000103723	AP3B2	15	rs1340944798	82420349	A	T	0.0858209	0.134166	0.0271887	4.62239e-06	0.00209758	0.0149351	FALSE
Glu-UL	ENSG00000259986		15	rs4386103	83248322	C	T	0.242537	-0.191815	0.021724	2.82971e-13	4.19571e-09	1.38127e-07	TRUE
Glu-UL	ENSG00000291062		15	rs150963	84540375	C	T	0.809702	0.158121	0.0329391	7.75214e-06	0.00358379	0.0230802	FALSE
Glu-UL	ENSG00000290688		15	rs2063036	84143022	A	G	0.541045	0.352771	0.0560958	1.85663e-08	2.14454e-05	0.000295426	TRUE
Glu-UL	ENSG00000290689		15	rs62028145	84389494	C	G	0.552239	0.365819	0.0545924	3.19618e-09	5.71203e-06	9.01349e-05	FALSE
Glu-UL	ENSG00000259683		15	rs11639244	84163898	G	A	0.238806	0.675705	0.0569129	5.48699e-19	5.35235e-14	4.48191e-12	FALSE
Glu-UL	ENSG00000259551		15	rs12901468	84164180	G	A	0.205224	0.737747	0.0651338	5.48547e-18	4.90833e-13	3.34945e-11	FALSE
Glu-UL	ENSG00000310356		15	rs10083628	84165017	C	G	0.212687	0.964843	0.0709341	4.68069e-22	2.01644e-16	2.88581e-14	FALSE
Glu-UL	ENSG00000310306		15	rs10083628	84165017	C	G	0.212687	0.456957	0.0582001	2.11767e-11	1.17429e-07	2.82714e-06	FALSE
Glu-UL	ENSG00000230373	GOLGA6L5P	15	rs12902672	84048234	G	A	0.223881	-0.413317	0.087156	9.67878e-06	0.00502673	0.029916	FALSE
Glu-UL	ENSG00000291210		15	rs11074002	85185951	C	A	0.597015	-0.302755	0.038415	1.85817e-11	1.47444e-07	3.4065e-06	FALSE
Glu-UL	ENSG00000183655	KLHL25	15	rs2614657	85769817	T	C	0.802239	-0.16134	0.0290249	3.8614e-07	0.000535323	0.00480078	FALSE
Glu-UL	ENSG00000305611		15	rs8031405	88562425	G	A	0.686567	-0.281425	0.0354833	1.49074e-11	5.19745e-08	1.37322e-06	FALSE
Glu-UL	ENSG00000289128		15	rs182317	89400370	G	T	0.358209	-0.176116	0.0225946	2.71982e-11	8.94723e-08	2.19511e-06	TRUE
Glu-UL	ENSG00000259713		15	rs11635261	89500108	G	C	0.309702	-0.85259	0.0766828	1.33059e-17	4.09683e-13	2.87175e-11	FALSE
Glu-UL	ENSG00000140534	TICRR	15	rs11635261	89500108	G	C	0.309702	-0.250837	0.0483326	1.69973e-06	0.00130732	0.0100305	FALSE
Glu-UL	ENSG00000260661		15	rs7175280	92385648	T	A	0.794776	-0.946971	0.0697103	5.02042e-22	6.61917e-17	1.03342e-14	FALSE
Glu-UL	ENSG00000309057		15	rs3743365	92394038	G	T	0.768657	-0.821094	0.0644935	1.56972e-20	8.67891e-16	1.17671e-13	TRUE
Glu-UL	ENSG00000183643	C15orf32	15	rs11637874	92444935	C	T	0.156716	0.640689	0.0671565	1.24017e-14	1.38337e-10	5.89033e-09	FALSE
Glu-UL	ENSG00000103852	TTC23	15	rs62023767	99251187	C	A	0.496269	-0.372249	0.0313703	5.63467e-19	1.30175e-14	1.2536e-12	TRUE
Glu-UL	ENSG00000183060	LYSMD4	15	rs35747287	99733402	G	C	0.675373	-0.30067	0.0265806	5.84647e-18	2.07166e-13	1.5033e-11	TRUE
Glu-UL	ENSG00000259363		15	rs7162911	99814845	A	G	0.537313	-0.218118	0.0388342	3.04878e-07	0.000498772	0.00454312	FALSE
Glu-UL	ENSG00000290767		15	rs11854556	99809494	C	A	0.320896	-0.293712	0.0525924	3.47356e-07	0.000573581	0.00506454	FALSE
Glu-UL	ENSG00000270127		15	rs12904576	100553922	T	C	0.410448	-0.831111	0.0510322	1.69097e-26	2.32111e-21	9.56689e-19	FALSE
Glu-UL	ENSG00000140471	LINS1	15	rs12904576	100553922	T	C	0.410448	-0.437243	0.0310357	6.85075e-23	5.58658e-18	1.12874e-15	FALSE
Glu-UL	ENSG00000131873	CHSY1	15	rs3765103	101252915	T	C	0.197761	-0.12404	0.023865	1.64819e-06	0.0022466	0.0158233	FALSE
Glu-UL	ENSG00000185418	TARS3	15	rs1811641	101698058	C	T	0.402985	0.160015	0.0225216	5.56556e-10	1.10405e-06	2.12245e-05	FALSE
Glu-UL	ENSG00000291225		15	rs616410	101648342	C	T	0.414179	-0.239871	0.0450476	9.92625e-07	0.000902697	0.0074294	FALSE
Glu-UL	ENSG00000103148	NPRL3	16	rs2032509	106495	G	A	0.33209	-0.114551	0.0168909	2.25629e-09	4.91608e-06	7.89042e-05	FALSE
Glu-UL	ENSG00000103245	CIAO3	16	rs1406815	728158	C	G	0.238806	0.201836	0.0275259	2.06332e-10	8.59322e-07	1.69638e-05	TRUE
Glu-UL	ENSG00000197599	CCDC154	16	rs11860968	1446612	T	C	0.0895522	0.383132	0.0711088	7.70519e-07	0.000985186	0.00796828	FALSE
Glu-UL	ENSG00000095906	NUBP2	16	rs2294619	1764439	A	G	0.182836	0.194961	0.0408138	8.48302e-06	0.00722166	0.0399215	FALSE
Glu-UL	ENSG00000140988	RPS2	16	rs338788	1959851	G	C	0.141791	0.473296	0.0706606	3.2341e-09	7.99048e-06	0.000121619	TRUE
Glu-UL	ENSG00000290728		16	rs11642560	2663728	G	A	0.134328	0.483363	0.0800542	5.3362e-08	5.43757e-05	0.000684964	FALSE
Glu-UL	ENSG00000059122	FLYWCH1	16	rs9928222	2936322	T	C	0.518657	0.146467	0.0228251	1.07744e-08	1.37017e-05	0.000198573	FALSE
Glu-UL	ENSG00000262362		16	rs2717705	3003465	G	C	0.634328	0.301398	0.044779	2.8108e-09	4.74516e-06	7.65184e-05	TRUE
Glu-UL	ENSG00000285329		16	rs62033651	3323351	A	G	0.283582	0.149537	0.0303968	4.9009e-06	0.00394003	0.0249074	FALSE
Glu-UL	ENSG00000262185	LINC02861	16	rs2238435	3964281	C	G	0.541045	-0.284019	0.0460925	3.17121e-08	4.91883e-05	0.000623188	FALSE
Glu-UL	ENSG00000089486	CDIP1	16	rs8046295	4478633	T	C	0.686567	-0.128811	0.0242325	1.02988e-06	0.00112683	0.00883647	FALSE
Glu-UL	ENSG00000102858	MGRN1	16	rs841227	4684512	C	T	0.514925	0.0808635	0.0137929	1.10735e-07	0.000164383	0.00178299	FALSE
Glu-UL	ENSG00000168096	ANKS3	16	rs73506280	4737225	G	A	0.0708955	0.15764	0.0317758	4.17204e-06	0.00469821	0.0284105	FALSE
Glu-UL	ENSG00000140623	SEPTIN12	16	rs56400014	4796532	G	A	0.41791	0.425213	0.0509793	2.44722e-12	1.51574e-08	4.44974e-07	FALSE
Glu-UL	ENSG00000267077		16	rs4619406	4829765	T	C	0.458955	0.232549	0.0425971	5.78e-07	0.000893464	0.00736111	FALSE
Glu-UL	ENSG00000285952		16	rs56400014	4796532	G	A	0.41791	0.476081	0.0502646	1.67689e-14	1.59637e-10	6.71402e-09	FALSE
Glu-UL	ENSG00000261617	LINC02177	16	rs7189960	9128750	T	C	0.615672	0.154756	0.0220737	8.37625e-10	3.62122e-06	6.04763e-05	FALSE
Glu-UL	ENSG00000261617	LINC02177	16	rs7189960	9128750	T	C	0.615672	0.154756	0.0220737	8.37625e-10	3.62122e-06	6.04763e-05	FALSE
Glu-UL	ENSG00000261617	LINC02177	16	rs7189960	9128750	T	C	0.615672	0.154756	0.0220737	8.37625e-10	3.62122e-06	6.04763e-05	FALSE
Glu-UL	ENSG00000298185		16	rs2965834	9184446	T	G	0.373134	0.267196	0.0460098	1.39232e-07	0.000250149	0.00255676	FALSE
Glu-UL	ENSG00000301034		16	rs2697653	10733105	G	C	0.276119	-0.426929	0.0633213	2.67507e-09	5.83425e-06	9.09493e-05	FALSE
Glu-UL	ENSG00000153060	TEKT5	16	rs2697653	10733105	G	C	0.276119	-0.320678	0.0540119	8.12643e-08	0.000154814	0.00169887	FALSE
Glu-UL	ENSG00000234719	NPIPB2	16	rs393329	11976565	T	C	0.570895	-1.1349	0.0732377	3.11987e-25	2.58831e-19	7.84429e-17	TRUE
Glu-UL	ENSG00000175595	ERCC4	16	rs74828012	13748765	C	G	0.11194	-0.228204	0.0480534	9.43508e-06	0.00784029	0.0427121	FALSE
Glu-UL	ENSG00000296325		16	rs4140665	15287858	A	G	0.682836	0.391952	0.0797032	4.9363e-06	0.00131648	0.0100857	FALSE
Glu-UL	ENSG00000085721	RRN3	16	rs12928424	15056916	C	G	0.503731	-0.0849301	0.0174881	6.2515e-06	0.00192022	0.0139006	FALSE
Glu-UL	ENSG00000183793	NPIPA5	16	rs3198697	15036083	C	T	0.339552	0.435176	0.0609662	4.82117e-10	9.93614e-07	1.92814e-05	FALSE
Glu-UL	ENSG00000103550	KNOP1	16	rs720173	19710484	C	T	0.179104	0.342678	0.0310216	1.80927e-17	5.91253e-13	4.00816e-11	FALSE
Glu-UL	ENSG00000185864	NPIPB4	16	rs148026928	21593021	G	A	0.0559702	-0.415906	0.0898099	1.47512e-05	0.00283773	0.0191742	FALSE
Glu-UL	ENSG00000158865	SLC5A11	16	rs200528	24747810	A	G	0.839552	-0.501651	0.0667252	9.15845e-11	2.16208e-07	4.82501e-06	FALSE
Glu-UL	ENSG00000291179		16	rs7404350	25033128	T	C	0.652985	-0.27899	0.0488419	2.06189e-07	0.000187045	0.00198731	FALSE
Glu-UL	ENSG00000262155	LINC02175	16	rs7498149	25032248	A	G	0.373134	-0.269899	0.0226636	4.71338e-19	1.49024e-14	1.3834e-12	TRUE
Glu-UL	ENSG00000296116		16	rs12929379	25258297	T	C	0.358209	-0.303723	0.0444892	1.85737e-09	4.92427e-06	7.89128e-05	TRUE
Glu-UL	ENSG00000198156	NPIPB6	16	rs2411440	28642202	C	T	0.421642	-0.351799	0.0528854	3.94194e-09	3.67198e-06	6.12248e-05	FALSE
Glu-UL	ENSG00000261832		16	rs2411453	28620700	T	G	0.570895	-0.241682	0.0416162	1.39207e-07	7.46393e-05	0.000909103	FALSE
Glu-UL	ENSG00000176476	SGF29	16	rs7498491	28832747	T	A	0.720149	0.131505	0.0261472	3.19569e-06	0.00108124	0.00855713	FALSE
Glu-UL	ENSG00000278665		16	rs62031607	28620209	A	T	0.33209	0.216981	0.0452895	8.03713e-06	0.00333322	0.0217519	FALSE
Glu-UL	ENSG00000196993	NPIPB9	16	rs62034319	28520867	T	G	0.402985	-0.407614	0.058112	8.25348e-10	1.09504e-06	2.10907e-05	FALSE
Glu-UL	ENSG00000168488	ATXN2L	16	rs117388875	29195714	T	A	0.0597015	-0.212291	0.0419626	2.84561e-06	0.00117659	0.00915007	TRUE
Glu-UL	ENSG00000169203	NPIPB12	16	rs111359561	29576837	G	A	0.380597	-0.426734	0.0453853	2.27062e-14	1.68292e-10	7.04926e-09	FALSE
Glu-UL	ENSG00000169592	INO80E	16	rs4787491	30004016	A	G	0.492537	-0.134889	0.0259547	1.65126e-06	0.000670184	0.00578344	FALSE
Glu-UL	ENSG00000102879	CORO1A	16	rs11646118	29915150	T	C	0.0932836	-0.242707	0.0551015	3.42087e-05	0.00817373	0.0441195	FALSE
Glu-UL	ENSG00000261231	LINC02133	16	rs55947829	47395144	T	C	0.130597	0.298755	0.0451563	4.6021e-09	2.01835e-06	3.55515e-05	FALSE
Glu-UL	ENSG00000102910	LONP2	16	rs8053839	48356601	G	T	0.473881	0.0564975	0.0105484	8.76021e-07	0.000328129	0.00321094	FALSE
Glu-UL	ENSG00000155393	HEATR3	16	rs1362633	50028661	G	A	0.686567	0.14973	0.0250103	6.61004e-08	0.000200071	0.00209298	FALSE
Glu-UL	ENSG00000285367		16	rs2270395	50812921	C	T	0.742537	-0.178668	0.035838	3.79393e-06	0.00303265	0.0201999	FALSE
Glu-UL	ENSG00000103479	RBL2	16	rs1978337	53425833	G	A	0.518657	-0.123983	0.0140754	3.10669e-13	2.1227e-09	7.50713e-08	FALSE
Glu-UL	ENSG00000125124	BBS2	16	rs4784672	56490151	A	C	0.19403	-0.129858	0.025331	2.18325e-06	0.00293009	0.0196693	FALSE
Glu-UL	ENSG00000159648	SPMIP8	16	rs12600304	57988232	C	T	0.511194	0.266514	0.0462672	1.69072e-07	0.000264762	0.00267993	FALSE
Glu-UL	ENSG00000125107	CNOT1	16	rs113571835	58589374	A	G	0.436567	-0.0652021	0.0137349	9.49972e-06	0.00607021	0.0348703	FALSE
Glu-UL	ENSG00000294295		16	rs1895481	64129086	A	G	0.242537	-0.365885	0.065371	3.30259e-07	0.000257275	0.00261959	FALSE
Glu-UL	ENSG00000141098	GFOD2	16	rs56377113	67784351	A	G	0.261194	0.0683001	0.0159352	5.27164e-05	0.00505332	0.0300465	FALSE
Glu-UL	ENSG00000132600	PRMT7	16	rs12325457	68317858	A	G	0.55597	-0.116951	0.0185163	1.65315e-08	1.44694e-05	0.000208526	FALSE
Glu-UL	ENSG00000141076	UTP4	16	rs74378158	69316966	C	T	0.0597015	0.204101	0.0447432	1.91322e-05	0.00866423	0.0461148	FALSE
Glu-UL	ENSG00000309888		16	rs3790085	69853817	A	G	0.44403	-0.188967	0.0404648	1.27356e-05	0.00394736	0.0249311	FALSE
Glu-UL	ENSG00000141101	NOB1	16	rs12921782	69746119	C	T	0.574627	0.157399	0.0340311	1.50769e-05	0.0050226	0.0299157	FALSE
Glu-UL	ENSG00000157322	CLEC18A	16	rs904810	69916753	T	C	0.641791	-0.207663	0.0474373	3.77788e-05	0.00818878	0.0441776	FALSE
Glu-UL	ENSG00000305455		16	rs3868140	69988953	G	A	0.787313	-0.456951	0.0605506	8.08452e-11	1.23993e-07	2.9439e-06	FALSE
Glu-UL	ENSG00000040199	PHLPP2	16	rs8056823	71651424	C	T	0.511194	-0.0839611	0.0180387	1.34993e-05	0.00638227	0.036354	FALSE
Glu-UL	ENSG00000140830	TXNL4B	16	rs34979323	72218386	G	A	0.212687	0.172422	0.0357061	6.94917e-06	0.00303617	0.0202102	FALSE
Glu-UL	ENSG00000304089		16	rs113315839	74663121	G	C	0.182836	0.354435	0.0700097	2.80559e-06	0.00242687	0.0167608	FALSE
Glu-UL	ENSG00000050820	BCAR1	16	rs13335245	75263176	T	C	0.145522	0.162155	0.0326054	3.97795e-06	0.00325046	0.0212793	FALSE
Glu-UL	ENSG00000259992		16	rs6564267	75570027	T	G	0.36194	0.16681	0.0259642	1.04278e-08	2.27209e-05	0.000310919	FALSE
Glu-UL	ENSG00000065457	ADAT1	16	rs2650400	75516639	A	G	0.309702	0.17928	0.0250873	4.6508e-10	1.39765e-06	2.60901e-05	TRUE
Glu-UL	ENSG00000186153	WWOX	16	rs67933378	78134425	G	A	0.13806	-0.219294	0.025586	8.86764e-13	1.65682e-08	4.80909e-07	FALSE
Glu-UL	ENSG00000135698	MPHOSPH6	16	rs2303260	82170181	C	G	0.488806	0.185803	0.0217259	9.62965e-13	1.39756e-08	4.1501e-07	TRUE
Glu-UL	ENSG00000140943	MBTPS1	16	rs2303239	84195974	C	T	0.309702	-0.0820629	0.0147165	3.59504e-07	0.00111086	0.00875119	FALSE
Glu-UL	ENSG00000103168	TAF1C	16	rs2278043	84180359	G	A	0.462687	-0.176866	0.029027	4.23443e-08	0.000177863	0.00190712	FALSE
Glu-UL	ENSG00000305404		16	rs387367	84484038	C	T	0.425373	0.377992	0.0440224	8.28047e-13	1.17021e-08	3.52576e-07	FALSE
Glu-UL	ENSG00000140950	MEAK7	16	rs389626	84483657	G	A	0.421642	0.135137	0.0183301	1.73384e-10	1.01801e-06	1.96808e-05	FALSE
Glu-UL	ENSG00000153786	ZDHHC7	16	rs9933798	85004494	A	G	0.246269	-0.110706	0.021805	2.65117e-06	0.00529321	0.0311315	FALSE
Glu-UL	ENSG00000103248	MTHFSD	16	rs16944719	86531581	A	T	0.0746269	0.25129	0.0434158	1.5084e-07	0.000421883	0.00393411	TRUE
Glu-UL	ENSG00000260456	C16orf95	16	rs7189655	87243040	C	T	0.44403	-0.187068	0.0281898	4.22371e-09	1.8306e-05	0.000258043	FALSE
Glu-UL	ENSG00000131152		16	rs8047984	87322000	C	G	0.350746	-0.19162	0.0326251	1.05928e-07	0.000247211	0.00253213	FALSE
Glu-UL	ENSG00000104731	KLHDC4	16	rs9934565	87730661	A	T	0.473881	0.375077	0.0221771	1.76931e-27	7.81747e-22	3.6615e-19	FALSE
Glu-UL	ENSG00000275734		16	rs417323	89679869	T	G	0.425373	0.21268	0.0317484	3.22369e-09	1.51258e-05	0.000216473	FALSE
Glu-UL	ENSG00000185324	CDK10	16	rs9939860	89680851	G	C	0.432836	-0.185227	0.0221665	2.2878e-12	4.23869e-08	1.14938e-06	FALSE
Glu-UL	ENSG00000158805	ZNF276	16	rs4785711	89731538	C	G	0.320896	0.123839	0.0261375	9.83816e-06	0.00784945	0.0427272	FALSE
Glu-UL	ENSG00000075399	VPS9D1	16	rs13330431	89963947	T	C	0.384328	0.139166	0.0236197	9.8075e-08	0.000162703	0.00176849	FALSE
Glu-UL	ENSG00000187741	FANCA	16	rs62056070	89846756	C	T	0.0820896	0.158061	0.0310233	2.47179e-06	0.00227527	0.0159844	FALSE
Glu-UL	ENSG00000293510	AFG3L1P	16	rs62052241	89958912	C	T	0.0858209	-0.166639	0.0326361	2.36672e-06	0.00207014	0.0148133	FALSE
Glu-UL	ENSG00000141013	GAS8	16	rs77603042	90016831	A	G	0.0858209	0.487225	0.0418921	1.51726e-18	3.23276e-13	2.31327e-11	FALSE
Glu-UL	ENSG00000187624	LIAT1	17	rs11150881	409513	A	G	0.246269	0.791155	0.0492405	3.76257e-26	2.81317e-21	1.07362e-18	TRUE
Glu-UL	ENSG00000141252	VPS53	17	rs4968169	501377	G	A	0.294776	-0.101246	0.013535	1.08106e-10	3.7366e-07	8.05499e-06	FALSE
Glu-UL	ENSG00000262213		17	rs8070391	1261284	A	G	0.787313	0.258237	0.051755	3.73294e-06	0.00474285	0.0285991	FALSE
Glu-UL	ENSG00000167711	SERPINF2	17	rs73292928	1743858	G	A	0.212687	0.40575	0.0625977	8.16904e-09	1.70905e-05	0.000242235	FALSE
Glu-UL	ENSG00000108963	DPH1	17	rs2273981	2030087	G	A	0.708955	-0.175558	0.0270036	7.51906e-09	1.32834e-05	0.0001936	TRUE
Glu-UL	ENSG00000167720	SRR	17	rs142426495	2258310	C	T	0.354478	-0.153575	0.0301345	2.45815e-06	0.00235775	0.0164155	FALSE
Glu-UL	ENSG00000299795		17	rs8078195	2511919	C	A	0.858209	-0.453612	0.0690295	5.57458e-09	9.30835e-06	0.000140227	TRUE
Glu-UL	ENSG00000196689	TRPV1	17	rs17634022	3605864	G	C	0.25	0.119934	0.0195212	3.42314e-08	5.59245e-05	0.000703613	FALSE
Glu-UL	ENSG00000083454	P2RX5	17	rs1107400	3712202	A	G	0.458955	-0.321573	0.050335	1.21508e-08	2.16689e-05	0.000297719	FALSE
Glu-UL	ENSG00000074370	ATP2A3	17	rs8065335	3938393	T	C	0.399254	0.225185	0.0449788	3.49525e-06	0.00347247	0.0225322	FALSE
Glu-UL	ENSG00000129204	USP6	17	rs143649705	5250721	G	A	0.0820896	2.4225	0.22989	1.61022e-16	4.9523e-11	2.31953e-09	FALSE
Glu-UL	ENSG00000167840	ZNF232	17	rs143649705	5250721	G	A	0.0820896	0.900084	0.0843516	9.07282e-17	3.71314e-12	2.18635e-10	FALSE
Glu-UL	ENSG00000198920	KIAA0753	17	rs72830354	6582546	G	A	0.100746	0.105681	0.0216592	5.72518e-06	0.00715771	0.0396958	FALSE
Glu-UL	ENSG00000256806	C17orf100	17	rs7226265	6652703	A	G	0.19403	0.872476	0.0652547	1.18108e-21	5.10537e-17	8.15127e-15	FALSE
Glu-UL	ENSG00000267532	MIR497HG	17	rs7219459	6988865	G	T	0.470149	0.12448	0.0208661	7.21756e-08	0.000105115	0.00122526	FALSE
Glu-UL	ENSG00000174282	ZBTB4	17	rs12942267	7469318	C	T	0.660448	0.0723299	0.0155101	1.30527e-05	0.00953609	0.0496023	FALSE
Glu-UL	ENSG00000183011	NAA38	17	rs8076642	7480665	A	G	0.626866	0.172452	0.0305179	2.65072e-07	0.000331954	0.00323608	FALSE
Glu-UL	ENSG00000170310	STX8	17	rs8974	9250544	G	C	0.548507	-0.0984417	0.0168805	1.25914e-07	0.000195665	0.00205523	TRUE
Glu-UL	ENSG00000109047	RCVRN	17	rs4668	9911106	T	C	0.645522	-0.334856	0.0499429	3.14349e-09	7.04009e-06	0.000108111	FALSE
Glu-UL	ENSG00000109063	MYH3	17	rs3826448	10729864	A	G	0.473881	0.204491	0.0408316	3.47227e-06	0.00502847	0.029916	TRUE
Glu-UL	ENSG00000006740	ARHGAP44	17	rs237288	12501738	G	A	0.197761	0.116175	0.0232705	3.69258e-06	0.0033473	0.0218024	FALSE
Glu-UL	ENSG00000125409	TEKT3	17	rs200768112	15540420	A	G	0.350746	-0.338284	0.0501784	2.68266e-09	5.2404e-06	8.29467e-05	FALSE
Glu-UL	ENSG00000266667		17	rs236815	15565130	C	A	0.36194	-0.429725	0.031771	6.34375e-22	4.34622e-17	7.10864e-15	FALSE
Glu-UL	ENSG00000239704	CDRT4	17	rs189330	15556691	A	T	0.33209	-0.182842	0.018573	3.27242e-15	3.01916e-11	1.48143e-09	FALSE
Glu-UL	ENSG00000175106	TVP23C	17	rs16940991	15538172	G	A	0.25	-0.146086	0.0196553	1.33359e-10	4.35222e-07	9.18983e-06	FALSE
Glu-UL	ENSG00000221926	TRIM16	17	rs1476777	15412878	C	T	0.261194	-0.0828646	0.0169363	5.43585e-06	0.00349082	0.0226228	TRUE
Glu-UL	ENSG00000214946	TBC1D26	17	rs3915632	15717333	G	A	0.75	0.417968	0.0513573	5.97959e-12	1.79849e-08	5.19105e-07	FALSE
Glu-UL	ENSG00000214941	ZSWIM7	17	rs178812	16193822	G	T	0.481343	0.103085	0.0219848	1.18518e-05	0.00411738	0.0257912	FALSE
Glu-UL	ENSG00000308416		17	rs1006957	16378924	G	T	0.175373	-0.488332	0.0602941	7.1098e-12	1.97398e-08	5.66585e-07	FALSE
Glu-UL	ENSG00000175061	SNHG29	17	rs35455145	16458125	T	C	0.406716	-0.12507	0.0155151	8.40663e-12	2.20885e-08	6.27012e-07	FALSE
Glu-UL	ENSG00000181350	LRRC75A	17	rs16959752	16487205	T	A	0.358209	-0.158176	0.0230288	1.55095e-09	2.96493e-06	5.04148e-05	FALSE
Glu-UL	ENSG00000287910		17	rs7223686	17057597	A	G	0.220149	-0.273433	0.029319	3.17565e-14	2.82452e-10	1.1369e-08	FALSE
Glu-UL	ENSG00000264187		17	rs7218992	17212319	C	A	0.16791	0.335346	0.0605412	4.18125e-07	0.000438284	0.00407598	FALSE
Glu-UL	ENSG00000108591	DRG2	17	rs2955360	18071573	G	A	0.526119	0.134705	0.02342	1.75186e-07	0.000106677	0.00123786	FALSE
Glu-UL	ENSG00000091536	MYO15A	17	rs2245737	18241406	C	T	0.626866	0.156421	0.0340422	1.68896e-05	0.00452818	0.0276418	FALSE
Glu-UL	ENSG00000176974	SHMT1	17	rs2273028	18335698	G	A	0.350746	0.201075	0.0424882	1.00453e-05	0.0031624	0.0208485	FALSE
Glu-UL	ENSG00000273018	FAM106A	17	rs62072802	18587096	A	G	0.514925	-1.06304	0.121094	3.54439e-13	1.55554e-09	5.58489e-08	FALSE
Glu-UL	ENSG00000273018	FAM106A	17	rs62072802	18587096	A	G	0.514925	-1.06304	0.121094	3.54439e-13	1.55554e-09	5.58489e-08	FALSE
Glu-UL	ENSG00000240445	FOXO3B	17	rs2601953	18676753	G	T	0.160448	-0.219652	0.0377353	1.31671e-07	9.55958e-05	0.00113093	FALSE
Glu-UL	ENSG00000141127	PRPSAP2	17	rs6502676	18900146	G	A	0.55597	0.123764	0.0146369	1.47471e-12	4.18124e-09	1.38091e-07	FALSE
Glu-UL	ENSG00000304681		17	rs12939559	19463306	T	A	0.652985	-0.263912	0.0407052	8.11234e-09	6.57182e-06	0.000101526	TRUE
Glu-UL	ENSG00000128487	SPECC1	17	rs12449662	19994532	T	C	0.320896	-0.142561	0.0305222	1.26959e-05	0.00242553	0.0167608	FALSE
Glu-UL	ENSG00000307353		17	rs62066976	20865685	A	G	0.186567	-0.2885	0.0640132	2.34579e-05	0.00619498	0.0354439	FALSE
Glu-UL	ENSG00000124422	USP22	17	rs4985941	20958820	A	G	0.847015	-0.0985853	0.0218809	2.35758e-05	0.00925263	0.0485734	FALSE
Glu-UL	ENSG00000298824		17	rs71217002	21847001	A	G	0.339552	0.422764	0.0901645	1.18572e-05	0.00281342	0.0190474	FALSE
Glu-UL	ENSG00000266202		17	rs2108952	27854839	C	T	0.791045	-0.458122	0.0536205	9.99204e-13	4.46569e-09	1.45619e-07	FALSE
Glu-UL	ENSG00000301334		17	rs9897022	28227749	C	T	0.227612	-0.478745	0.047546	1.22864e-15	1.32734e-11	6.90472e-10	TRUE
Glu-UL	ENSG00000004139	SARM1	17	rs74256937	28320984	C	T	0.130597	-0.119328	0.0228891	1.54851e-06	0.000767117	0.00647915	FALSE
Glu-UL	ENSG00000109111	SUPT6H	17	rs614434	28524483	G	A	0.708955	-0.102531	0.0205033	3.57473e-06	0.00138066	0.0104994	FALSE
Glu-UL	ENSG00000173065	FAM222B	17	rs11080062	28461431	A	G	0.507463	-0.0557547	0.0118352	1.09036e-05	0.00438909	0.0270654	FALSE
Glu-UL	ENSG00000176927	EFCAB5	17	rs3936006	29930642	A	G	0.529851	0.212213	0.0209729	9.90986e-16	5.07316e-12	2.88813e-10	TRUE
Glu-UL	ENSG00000214719		17	rs216412	30576376	A	G	0.858209	-0.267827	0.0419683	1.25183e-08	9.85209e-06	0.000146915	TRUE
Glu-UL	ENSG00000290928		17	rs11657985	30767757	G	A	0.13806	-0.129746	0.0196221	4.67702e-09	3.68868e-06	6.1404e-05	FALSE
Glu-UL	ENSG00000263603		17	rs73267873	30741439	C	T	0.115672	-0.490919	0.0543625	1.16713e-13	6.52731e-10	2.49107e-08	FALSE
Glu-UL	ENSG00000280069		17	rs9899268	30823237	T	C	0.104478	-0.330921	0.0750392	3.35563e-05	0.00689238	0.0386192	FALSE
Glu-UL	ENSG00000265334		17	rs3764420	30837136	A	G	0.0858209	-0.36741	0.049221	1.15869e-10	1.89283e-07	4.27723e-06	FALSE
Glu-UL	ENSG00000184060	ADAP2	17	rs76743571	30868997	T	C	0.0970149	0.406825	0.0806205	2.99281e-06	0.000838542	0.00696818	FALSE
Glu-UL	ENSG00000277511		17	rs7218088	32217270	A	G	0.201493	-0.253109	0.0540901	1.22869e-05	0.00811155	0.0438297	FALSE
Glu-UL	ENSG00000141314	RHBDL3	17	rs7210096	32279547	G	A	0.481343	0.250046	0.0399307	2.07883e-08	1.72561e-05	0.000244246	FALSE
Glu-UL	ENSG00000274512	TBC1D3L	17	rs59870317	38255522	A	G	0.809702	0.815123	0.0996106	4.91013e-12	1.16819e-08	3.52576e-07	FALSE
Glu-UL	ENSG00000274512	TBC1D3L	17	rs59870317	38255522	A	G	0.809702	0.815123	0.0996106	4.91013e-12	1.16819e-08	3.52576e-07	FALSE
Glu-UL	ENSG00000161395	PGAP3	17	rs2643195	39696865	A	G	0.69403	-0.140804	0.0302125	1.31994e-05	0.00465143	0.0282436	FALSE
Glu-UL	ENSG00000173801	JUP	17	rs4796702	41786667	T	C	0.664179	0.120388	0.0189948	1.50697e-08	2.206e-05	0.000302679	TRUE
Glu-UL	ENSG00000108797	CNTNAP1	17	rs1973520	42669080	G	A	0.514925	0.212137	0.0392719	7.28914e-07	0.000280049	0.00279893	FALSE
Glu-UL	ENSG00000198496	NBR2	17	rs71379215	43306756	A	G	0.380597	0.188618	0.0260835	3.21083e-10	3.92668e-07	8.41194e-06	FALSE
Glu-UL	ENSG00000108852	MPP2	17	rs1642611	43920344	T	C	0.891791	0.277054	0.0321024	6.82014e-13	3.20068e-09	1.11044e-07	FALSE
Glu-UL	ENSG00000108309	RUNDC3A	17	rs11655476	44338404	C	T	0.369403	0.193547	0.0344147	2.95899e-07	0.000192929	0.00203081	FALSE
Glu-UL	ENSG00000161692	DBF4B	17	rs8072943	44658049	A	G	0.164179	-0.371421	0.0425264	4.31736e-13	4.49729e-09	1.46187e-07	FALSE
Glu-UL	ENSG00000182963	GJC1	17	rs12164	44848191	C	T	0.697761	-0.31708	0.025252	3.2134e-20	7.3376e-15	7.71514e-13	FALSE
Glu-UL	ENSG00000294432		17	rs7216522	45031337	A	G	0.421642	0.473475	0.051839	7.41126e-14	1.04733e-09	3.82693e-08	FALSE
Glu-UL	ENSG00000159314	ARHGAP27	17	rs3843738	45661828	A	G	0.451493	0.275058	0.0448958	3.67945e-08	4.92297e-05	0.000623188	FALSE
Glu-UL	ENSG00000267198		17	rs62063286	45964621	T	C	0.208955	0.652541	0.0771882	1.48595e-12	6.1357e-09	1.94535e-07	FALSE
Glu-UL	ENSG00000225190	PLEKHM1	17	rs62065454	45496226	A	G	0.477612	0.0979931	0.0204919	8.31624e-06	0.0044955	0.0275245	FALSE
Glu-UL	ENSG00000291175		17	rs62057151	45826476	C	T	0.216418	-0.360427	0.0444959	7.07673e-12	2.15319e-08	6.14599e-07	FALSE
Glu-UL	ENSG00000285668		17	rs55974014	45680084	C	A	0.19403	1.72027	0.0758576	1.44563e-35	7.55605e-28	1.55719e-24	FALSE
Glu-UL	ENSG00000120088	CRHR1	17	rs9915547	46135416	T	C	0.25	-0.157046	0.0302183	1.6515e-06	0.000743769	0.0063078	FALSE
Glu-UL	ENSG00000120088	CRHR1	17	rs9915547	46135416	T	C	0.25	-0.157046	0.0302183	1.6515e-06	0.000743769	0.0063078	FALSE
Glu-UL	ENSG00000120071	KANSL1	17	rs3785884	45980229	G	A	0.212687	0.604156	0.0478176	2.33353e-20	1.25729e-15	1.56089e-13	FALSE
Glu-UL	ENSG00000305133		17	rs1378358	46709946	C	T	0.190299	3.91329	0.178386	1.29538e-34	9.60497e-28	1.64953e-24	FALSE
Glu-UL	ENSG00000305150		17	rs1378358	46709946	C	T	0.190299	1.24368	0.106225	1.09511e-18	2.57637e-14	2.26902e-12	FALSE
Glu-UL	ENSG00000305169		17	rs199528	46765770	C	T	0.186567	1.24459	0.0811376	5.61907e-25	1.13359e-19	3.76801e-17	FALSE
Glu-UL	ENSG00000176681	LRRC37A	17	rs62061733	45941033	A	G	0.216418	0.849593	0.0658614	7.90295e-21	1.93387e-16	2.80663e-14	TRUE
Glu-UL	ENSG00000228696	ARL17B	17	rs199528	46765770	C	T	0.186567	2.48223	0.145234	9.38787e-28	1.30712e-22	7.48271e-20	FALSE
Glu-UL	ENSG00000228696	ARL17B	17	rs199528	46765770	C	T	0.186567	2.48223	0.145234	9.38787e-28	1.30712e-22	7.48271e-20	FALSE
Glu-UL	ENSG00000228696	ARL17B	17	rs199528	46765770	C	T	0.186567	2.48223	0.145234	9.38787e-28	1.30712e-22	7.48271e-20	FALSE
Glu-UL	ENSG00000260075	NSFP1	17	rs17698176	46742229	T	G	0.190299	0.822209	0.125433	5.97746e-09	3.20219e-06	5.40035e-05	FALSE
Glu-UL	ENSG00000238083	LRRC37A2	17	rs62062271	46014622	T	C	0.212687	0.923179	0.0662703	1.27407e-22	3.77515e-18	8.2766e-16	FALSE
Glu-UL	ENSG00000238083	LRRC37A2	17	rs62062271	46014622	T	C	0.212687	0.923179	0.0662703	1.27407e-22	3.77515e-18	8.2766e-16	FALSE
Glu-UL	ENSG00000185829	ARL17A	17	rs62074125	46775246	A	C	0.242537	0.638186	0.119722	9.70172e-07	0.000268668	0.00270353	FALSE
Glu-UL	ENSG00000185829	ARL17A	17	rs62074125	46775246	A	C	0.242537	0.638186	0.119722	9.70172e-07	0.000268668	0.00270353	FALSE
Glu-UL	ENSG00000073969	NSF	17	rs3809857	46770948	G	T	0.287313	0.136683	0.0302284	2.22043e-05	0.00459666	0.0279605	TRUE
Glu-UL	ENSG00000108433	GOSR2	17	rs9898527	46958844	G	A	0.436567	0.0800537	0.0157397	2.55898e-06	0.00119615	0.00929517	FALSE
Glu-UL	ENSG00000262633		17	rs199528	46765770	C	T	0.186567	0.979039	0.0683248	2.67555e-23	7.60961e-18	1.47946e-15	FALSE
Glu-UL	ENSG00000259207	ITGB3	17	rs11656865	47269123	A	G	0.30597	-0.253268	0.0555156	1.90961e-05	0.00833157	0.0447371	FALSE
Glu-UL	ENSG00000178852	EFCAB13	17	rs11655943	47308274	T	C	0.421642	0.386973	0.0409317	1.80984e-14	1.2375e-10	5.35779e-09	FALSE
Glu-UL	ENSG00000253347		17	rs7208530	47466741	C	T	0.529851	-0.162854	0.027896	1.22723e-07	0.000109654	0.00126387	FALSE
Glu-UL	ENSG00000015532	XYLT2	17	rs2526523	50339860	C	A	0.526119	-0.157662	0.0299655	1.27865e-06	0.00161352	0.0120044	FALSE
Glu-UL	ENSG00000305841		17	rs56361287	51087506	T	C	0.11194	-0.283652	0.0610781	1.40393e-05	0.0088985	0.0471668	TRUE
Glu-UL	ENSG00000141198	TOM1L1	17	rs2907639	54805076	A	C	0.253731	-0.184905	0.0347832	1.02873e-06	0.000920473	0.00753957	FALSE
Glu-UL	ENSG00000265542		17	rs2685499	57855831	G	C	0.466418	0.167126	0.034534	6.67387e-06	0.00653572	0.0370821	FALSE
Glu-UL	ENSG00000108406	DHX40	17	rs7210832	59530853	A	G	0.283582	0.106155	0.0193364	5.10609e-07	0.000294445	0.00291453	FALSE
Glu-UL	ENSG00000189050	RNFT1	17	rs1051424	59946963	A	G	0.19403	-0.136149	0.0304206	2.63492e-05	0.00448767	0.0275104	FALSE
Glu-UL	ENSG00000265702		17	rs9891713	62712044	T	C	0.391791	-0.250652	0.045817	5.51782e-07	0.000312526	0.00307579	FALSE
Glu-UL	ENSG00000303765		17	rs41410147	64966066	C	T	0.0708955	1.36292	0.137605	2.51771e-15	9.41106e-11	4.17991e-09	TRUE
Glu-UL	ENSG00000154240	CEP112	17	rs229866	66110632	G	T	0.951493	0.251527	0.044913	3.25902e-07	0.000385929	0.00367533	FALSE
Glu-UL	ENSG00000196704	AMZ2	17	rs12451195	68208494	C	A	0.298507	0.302479	0.027863	4.09068e-17	5.99606e-13	4.03822e-11	FALSE
Glu-UL	ENSG00000070540	WIPI1	17	rs2909210	68460340	G	T	0.477612	-0.416903	0.0562551	1.46477e-10	3.97163e-07	8.49059e-06	FALSE
Glu-UL	ENSG00000187959	CPSF4L	17	rs7216348	73261530	G	A	0.38806	0.235464	0.0489623	7.49889e-06	0.00868586	0.0462061	FALSE
Glu-UL	ENSG00000161542	PRPSAP1	17	rs10459	76311656	T	C	0.208955	-0.104136	0.0211776	4.94337e-06	0.00489703	0.0293886	FALSE
Glu-UL	ENSG00000163597	SNHG16	17	rs4647887	76562724	A	G	0.38806	-0.358121	0.0346878	4.05626e-16	5.82257e-12	3.26071e-10	FALSE
Glu-UL	ENSG00000182534	MXRA7	17	rs9915664	76710142	T	C	0.921642	-0.487359	0.061108	1.22708e-11	7.59746e-08	1.90942e-06	TRUE
Glu-UL	ENSG00000267065	LINC02080	17	rs62086795	76761062	G	A	0.0597015	0.938901	0.107157	3.81562e-13	5.30079e-09	1.70158e-07	FALSE
Glu-UL	ENSG00000167889	MGAT5B	17	rs60353633	76921109	A	G	0.548507	-0.0822357	0.0161525	2.50813e-06	0.00302133	0.0201374	FALSE
Glu-UL	ENSG00000129657	SEC14L1	17	rs480454	77072506	T	C	0.179104	0.131907	0.0212062	2.48036e-08	5.61639e-05	0.000705763	FALSE
Glu-UL	ENSG00000167280	ENGASE	17	rs7213010	79078745	T	C	0.350746	-0.261674	0.043608	6.23775e-08	0.000103892	0.00121513	FALSE
Glu-UL	ENSG00000141519	CCDC40	17	rs894309	80030415	A	G	0.0746269	0.642571	0.0532547	2.4467e-19	1.34787e-14	1.286e-12	FALSE
Glu-UL	ENSG00000171298	GAA	17	rs8077055	80102206	C	A	0.220149	-0.404755	0.047163	8.43948e-13	6.64407e-09	2.10006e-07	TRUE
Glu-UL	ENSG00000173821	RNF213	17	rs62074445	80277897	C	T	0.16791	1.07967	0.121875	2.48807e-13	2.12736e-09	7.50713e-08	TRUE
Glu-UL	ENSG00000171246	NPTX1	17	rs12185227	80524111	G	C	0.537313	0.300975	0.0406708	1.53476e-10	6.03334e-07	1.23351e-05	TRUE
Glu-UL	ENSG00000157637	SLC38A10	17	rs115343321	81294933	T	C	0.119403	0.193179	0.0373431	1.81611e-06	0.00243707	0.0168199	TRUE
Glu-UL	ENSG00000185624	P4HB	17	rs111301737	81847127	A	G	0.179104	0.153901	0.025772	7.0401e-08	6.93159e-05	0.000851867	FALSE
Glu-UL	ENSG00000169660	HEXD	17	rs9904516	82432635	G	A	0.246269	0.101526	0.0219719	1.533e-05	0.00871405	0.0463321	FALSE
Glu-UL	ENSG00000167363	FN3K	17	rs2253122	82739030	T	C	0.63806	0.155571	0.0287012	6.76252e-07	0.000724928	0.00617852	FALSE
Glu-UL	ENSG00000175711	B3GNTL1	17	rs57923322	83051760	T	G	0.238806	-0.232397	0.0369782	1.88872e-08	3.11499e-05	0.000415234	TRUE
Glu-UL	ENSG00000175711	B3GNTL1	17	rs57923322	83051760	T	G	0.238806	-0.232397	0.0369782	1.88872e-08	3.11499e-05	0.000415234	TRUE
Glu-UL	ENSG00000079101	CLUL1	18	rs2015412	590969	C	T	0.272388	0.354403	0.0681002	1.60585e-06	0.00213025	0.0151279	FALSE
Glu-UL	ENSG00000132199	ENOSF1	18	rs62088358	811723	G	A	0.0783582	0.387377	0.0758039	2.32722e-06	0.00311432	0.0205974	TRUE
Glu-UL	ENSG00000101605	MYOM1	18	rs60361323	3609772	C	T	0.30597	0.242692	0.0458737	1.13902e-06	0.00152061	0.0114287	FALSE
Glu-UL	ENSG00000263753	LINC00667	18	rs11875052	5237576	G	T	0.164179	0.242933	0.0444922	5.75965e-07	0.000821712	0.00683935	TRUE
Glu-UL	ENSG00000264449		18	rs11663009	5896080	A	G	0.720149	0.200409	0.0334513	6.49126e-08	8.23144e-05	0.000989717	TRUE
Glu-UL	ENSG00000266846		18	rs11663009	5896080	A	G	0.720149	0.243707	0.0473065	1.97652e-06	0.00173025	0.0127714	TRUE
Glu-UL	ENSG00000088756	ARHGAP28	18	rs11663818	6745714	A	G	0.5	0.171037	0.0222909	4.64295e-11	1.32319e-07	3.10581e-06	FALSE
Glu-UL	ENSG00000168502	MTCL1	18	rs1481034	8913054	A	G	0.406716	-0.119078	0.0223404	9.71658e-07	0.00146684	0.0110811	TRUE
Glu-UL	ENSG00000134265	NAPG	18	rs12962879	10526266	C	G	0.320896	-0.151195	0.0256376	9.5881e-08	0.000167398	0.00181197	TRUE
Glu-UL	ENSG00000255112	CHMP1B	18	rs28579578	11418592	G	A	0.0671642	-0.316574	0.0602211	1.30223e-06	0.00128078	0.00984887	FALSE
Glu-UL	ENSG00000154889	MPPE1	18	rs8097892	11905954	C	T	0.440298	-0.333753	0.0355784	2.49787e-14	1.41434e-10	5.99741e-09	FALSE
Glu-UL	ENSG00000267079		18	rs4239303	11938805	A	C	0.369403	0.334814	0.0563532	7.98625e-08	0.000122508	0.00138541	FALSE
Glu-UL	ENSG00000267199		18	rs59992891	12440859	G	C	0.41791	-0.454349	0.0382617	5.43812e-19	8.74407e-14	6.87794e-12	FALSE
Glu-UL	ENSG00000289624		18	rs140847117	22531305	C	T	0.108209	-0.428648	0.083657	2.20562e-06	0.00121065	0.0093796	FALSE
Glu-UL	ENSG00000101773	RBBP8	18	rs599489	22462473	C	A	0.279851	-0.129722	0.028676	2.20345e-05	0.0092815	0.0486216	FALSE
Glu-UL	ENSG00000134490	TMEM241	18	rs17259237	23419109	C	T	0.343284	0.111537	0.0189027	9.46139e-08	6.93614e-05	0.000851867	FALSE
Glu-UL	ENSG00000141458	NPC1	18	rs1788823	23534953	A	G	0.675373	-0.110411	0.0222851	4.27933e-06	0.00259332	0.0177556	FALSE
Glu-UL	ENSG00000046604	DSG2	18	rs2704055	31510771	A	G	0.533582	-0.242708	0.0514817	1.07582e-05	0.00724969	0.0400232	FALSE
Glu-UL	ENSG00000274184		18	rs4799375	35244321	G	A	0.858209	0.344711	0.0654202	1.23984e-06	0.000988729	0.00798441	FALSE
Glu-UL	ENSG00000153391	INO80C	18	rs7239539	35445557	C	T	0.0559702	-0.269065	0.0559504	7.50137e-06	0.0044412	0.0273213	FALSE
Glu-UL	ENSG00000141429	GALNT1	18	rs12962202	35592865	T	C	0.119403	0.101417	0.0199916	2.69417e-06	0.00162507	0.0120729	FALSE
Glu-UL	ENSG00000134775	FHOD3	18	rs67338120	36297197	T	C	0.391791	-0.0514813	0.010241	3.22597e-06	0.00284957	0.0192416	TRUE
Glu-UL	ENSG00000150477	KIAA1328	18	rs1147760	36820739	G	A	0.19403	-0.0622633	0.0126993	5.22659e-06	0.00295482	0.0197838	FALSE
Glu-UL	ENSG00000134779	TPGS2	18	rs7226408	36791898	C	T	0.13806	0.138921	0.0267821	1.71802e-06	0.00109805	0.00867182	FALSE
Glu-UL	ENSG00000152229	PSTPIP2	18	rs9783888	46071404	G	T	0.36194	0.343656	0.0428709	1.02563e-11	4.50168e-08	1.21113e-06	TRUE
Glu-UL	ENSG00000167216	KATNAL2	18	rs10853545	46895257	A	T	0.567164	-0.16772	0.0352336	9.03893e-06	0.00615247	0.0352595	FALSE
Glu-UL	ENSG00000167220	HDHD2	18	rs79420880	47137316	C	T	0.0708955	-0.235429	0.0383595	3.51522e-08	4.61842e-05	0.000589707	FALSE
Glu-UL	ENSG00000101751	POLI	18	rs2849232	54257678	G	C	0.0671642	0.347394	0.0525296	4.65602e-09	7.71879e-06	0.000117657	FALSE
Glu-UL	ENSG00000260930	LINC01416	18	rs11876635	55758074	C	T	0.335821	-0.212763	0.0441489	7.21286e-06	0.00484879	0.0291243	FALSE
Glu-UL	ENSG00000172175	MALT1	18	rs7506913	58671446	A	C	0.488806	-0.12149	0.016634	2.34044e-10	8.21546e-07	1.62796e-05	TRUE
Glu-UL	ENSG00000197563	PIGN	18	rs9962796	62243911	A	G	0.0597015	0.158423	0.0338706	1.23841e-05	0.00875932	0.0465488	FALSE
Glu-UL	ENSG00000263655		18	rs3813115	74147828	G	A	0.0708955	0.58834	0.0928647	1.52309e-08	3.74315e-05	0.000491342	TRUE
Glu-UL	ENSG00000141665	FBXO15	18	rs3813115	74147828	G	A	0.0708955	0.478125	0.0885427	7.34266e-07	0.00100874	0.00808898	TRUE
Glu-UL	ENSG00000166347	CYB5A	18	rs77218854	74289416	G	A	0.197761	-0.229789	0.0441866	1.62966e-06	0.001921	0.0139006	FALSE
Glu-UL	ENSG00000150656	CNDP1	18	rs7577	74521112	T	C	0.216418	0.387542	0.0555632	9.79511e-10	2.46694e-06	4.25082e-05	FALSE
Glu-UL	ENSG00000287281		18	rs10871567	75107447	G	A	0.854478	-0.226012	0.0465704	6.33229e-06	0.00827681	0.0445141	FALSE
Glu-UL	ENSG00000141759	TXNL4A	18	rs112976362	80109435	G	T	0.36194	-0.0800087	0.0146701	5.90778e-07	0.000520167	0.00469757	TRUE
Glu-UL	ENSG00000267127		18	rs9961321	80067563	G	A	0.343284	-0.297937	0.0292003	6.85569e-16	8.80759e-12	4.70236e-10	FALSE
Glu-UL	ENSG00000160953	PWWP3A	19	rs2526132	1364856	T	C	0.742537	-0.152219	0.0187912	7.06685e-12	2.73923e-08	7.64924e-07	FALSE
Glu-UL	ENSG00000115266	APC2	19	rs2656873	1457479	T	C	0.574627	0.156483	0.0252894	2.84503e-08	6.47742e-05	0.000805125	FALSE
Glu-UL	ENSG00000185988	PLK5	19	rs265296	1508739	G	A	0.391791	0.209072	0.0433651	7.15861e-06	0.00695832	0.038883	FALSE
Glu-UL	ENSG00000130332	LSM7	19	rs10402757	2353374	T	C	0.604478	0.162117	0.0300176	7.31861e-07	0.00105145	0.00835987	FALSE
Glu-UL	ENSG00000253392		19	rs6510719	2903037	T	C	0.876866	-0.211819	0.0402629	1.28149e-06	0.00381388	0.0242737	FALSE
Glu-UL	ENSG00000065717	TLE2	19	rs425485	3053804	T	C	0.69403	-0.193214	0.0392702	4.8892e-06	0.00546026	0.0319453	FALSE
Glu-UL	ENSG00000167670	CHAF1A	19	rs34080966	4417848	T	C	0.182836	-0.200498	0.0283074	6.12707e-10	1.66646e-06	3.00933e-05	FALSE
Glu-UL	ENSG00000167671	UBXN6	19	rs2230636	4409759	A	G	0.179104	-0.225397	0.0321817	8.63417e-10	1.67603e-06	3.01927e-05	FALSE
Glu-UL	ENSG00000074842	MYDGF	19	rs59473583	4656527	C	T	0.0634328	-0.293249	0.0617725	9.49718e-06	0.00921529	0.0485161	FALSE
Glu-UL	ENSG00000187650	VMAC	19	rs274795	5921341	G	A	0.0858209	0.390675	0.0780304	3.49202e-06	0.00293611	0.0196841	TRUE
Glu-UL	ENSG00000125734	GPR108	19	rs340135	6737228	T	C	0.298507	-0.245572	0.0486219	2.9409e-06	0.00342583	0.0222576	TRUE
Glu-UL	ENSG00000142459	EVI5L	19	rs2307003	7847930	C	T	0.395522	0.12762	0.0155651	4.57543e-12	2.93397e-08	8.14278e-07	FALSE
Glu-UL	ENSG00000090661	CERS4	19	rs62126382	8208032	C	T	0.485075	0.0902428	0.0179669	3.2802e-06	0.00390755	0.0247628	TRUE
Glu-UL	ENSG00000186994	KANK3	19	rs3111570	8327813	T	C	0.216418	0.375648	0.0796562	1.07009e-05	0.00931394	0.0487611	FALSE
Glu-UL	ENSG00000188000	OR7D2	19	rs73498852	9201580	C	T	0.0671642	0.74636	0.120158	2.57332e-08	3.61214e-05	0.000475963	FALSE
Glu-UL	ENSG00000188321	ZNF559	19	rs28384491	9324196	C	T	0.0895522	-0.412023	0.0330233	4.46336e-20	1.75752e-15	2.0816e-13	TRUE
Glu-UL	ENSG00000174652	ZNF266	19	rs11667308	9287701	A	C	0.473881	0.202291	0.0238573	1.32885e-12	4.02785e-09	1.33884e-07	FALSE
Glu-UL	ENSG00000287275		19	rs11086035	9435784	C	T	0.477612	-0.835485	0.0568392	6.40287e-24	5.48369e-19	1.56959e-16	TRUE
Glu-UL	ENSG00000196605	ZNF846	19	rs1833791	9689900	C	T	0.227612	-0.217073	0.0282141	4.23721e-11	1.15963e-07	2.79839e-06	FALSE
Glu-UL	ENSG00000196605	ZNF846	19	rs1833791	9689900	C	T	0.227612	-0.217073	0.0282141	4.23721e-11	1.15963e-07	2.79839e-06	FALSE
Glu-UL	ENSG00000129347	KRI1	19	rs4804506	10531615	T	C	0.149254	-0.195012	0.0417518	1.26952e-05	0.00822928	0.0443264	FALSE
Glu-UL	ENSG00000171291	ZNF439	19	rs279217	11877508	A	C	0.0597015	-0.292301	0.0600176	5.92774e-06	0.00329713	0.0215574	FALSE
Glu-UL	ENSG00000198429	ZNF69	19	rs4804175	11947721	C	T	0.440298	0.161831	0.0166604	5.80422e-15	5.50665e-11	2.5675e-09	FALSE
Glu-UL	ENSG00000197054	ZNF763	19	rs429472	11990223	C	T	0.0858209	-0.351245	0.0720299	5.78956e-06	0.00322691	0.0212059	FALSE
Glu-UL	ENSG00000286132		19	rs11670621	12078564	C	T	0.44403	-0.226489	0.0448762	2.98332e-06	0.00136827	0.0104205	FALSE
Glu-UL	ENSG00000268870		19	rs12974774	12501410	T	G	0.287313	-0.185999	0.0358345	1.695e-06	0.000854764	0.00707445	FALSE
Glu-UL	ENSG00000269755		19	rs2861419	12491203	C	G	0.503731	-0.323464	0.0291844	1.54467e-17	1.99519e-13	1.45808e-11	FALSE
Glu-UL	ENSG00000269693		19	rs2042946	12594540	A	G	0.608209	-0.232052	0.0250248	4.01382e-14	1.28874e-10	5.53313e-09	FALSE
Glu-UL	ENSG00000188033	ZNF490	19	rs12459123	12578927	T	C	0.608209	-0.147322	0.0225343	6.43635e-09	5.82721e-06	9.09493e-05	FALSE
Glu-UL	ENSG00000132016	BRME1	19	rs7245892	13879957	T	C	0.276119	-0.114929	0.0235978	5.92597e-06	0.00363057	0.0233377	TRUE
Glu-UL	ENSG00000104998	IL27RA	19	rs35018855	14039050	C	T	0.115672	0.309863	0.0598695	1.7978e-06	0.00131534	0.0100845	FALSE
Glu-UL	ENSG00000295841		19	rs10420657	14306244	G	A	0.488806	-0.14027	0.0300737	1.30134e-05	0.00763302	0.0418142	FALSE
Glu-UL	ENSG00000267723		19	rs11667698	14304600	A	T	0.108209	-0.277476	0.0558008	3.98799e-06	0.00338909	0.0220467	FALSE
Glu-UL	ENSG00000105143	SLC1A6	19	rs61260083	14965110	C	T	0.339552	0.266384	0.0362114	1.85966e-10	4.26232e-07	9.04321e-06	FALSE
Glu-UL	ENSG00000105072	C19orf44	19	rs7251415	16489139	A	G	0.858209	0.236947	0.041767	2.42006e-07	0.000218747	0.00225177	TRUE
Glu-UL	ENSG00000127526	SLC35E1	19	rs111619257	16700260	A	G	0.0447761	0.204363	0.0418058	5.52727e-06	0.00376966	0.0240666	FALSE
Glu-UL	ENSG00000160111	CPAMD8	19	rs11878608	17026480	A	C	0.58209	0.1712	0.0353439	6.56254e-06	0.00469492	0.0284073	TRUE
Glu-UL	ENSG00000099308	MAST3	19	rs12052085	18153061	C	T	0.414179	-0.126074	0.0259027	5.99786e-06	0.00491186	0.0294433	TRUE
Glu-UL	ENSG00000130518	IQCN	19	rs1421720	18284966	T	C	0.283582	-0.369233	0.0429687	8.03838e-13	4.51298e-09	1.46235e-07	FALSE
Glu-UL	ENSG00000130283	GDF1	19	rs7255805	18795725	T	C	0.242537	0.093332	0.0194356	7.70193e-06	0.00419767	0.0262144	TRUE
Glu-UL	ENSG00000184162	NR2C2AP	19	rs34346921	19223473	T	A	0.0559702	0.463496	0.102794	2.32755e-05	0.00858462	0.0457383	FALSE
Glu-UL	ENSG00000294647		19	rs75667002	19481423	T	A	0.152985	0.966708	0.0670808	1.94652e-23	4.42478e-18	9.30491e-16	FALSE
Glu-UL	ENSG00000105708	ZNF14	19	rs56129543	19709666	G	C	0.339552	-0.255407	0.0212197	2.76898e-19	1.39605e-14	1.31975e-12	FALSE
Glu-UL	ENSG00000256771	ZNF253	19	rs143517257	19852718	G	A	0.175373	-0.1834	0.0298947	3.55388e-08	3.98086e-05	0.000516621	FALSE
Glu-UL	ENSG00000184635	ZNF93	19	rs73008648	19884679	T	C	0.160448	0.187693	0.0292085	1.03666e-08	1.83535e-05	0.000258359	FALSE
Glu-UL	ENSG00000291130		19	rs1978434	20404632	A	C	0.451493	-0.290623	0.0394088	1.71738e-10	4.15849e-07	8.85332e-06	FALSE
Glu-UL	ENSG00000269110		19	rs2288536	20645971	C	T	0.257463	0.251245	0.0332156	7.48872e-11	1.80032e-07	4.09514e-06	FALSE
Glu-UL	ENSG00000188171	ZNF626	19	rs656864	20664011	G	A	0.253731	0.0996756	0.0213287	1.25727e-05	0.00725537	0.0400232	FALSE
Glu-UL	ENSG00000182141	ZNF708	19	rs1629897	21340367	G	A	0.216418	0.192936	0.024679	2.45589e-11	6.28249e-08	1.60238e-06	TRUE
Glu-UL	ENSG00000172687	ZNF738	19	rs2937157	21378003	G	A	0.958955	-0.539167	0.0677922	1.35283e-11	6.84186e-08	1.73646e-06	FALSE
Glu-UL	ENSG00000196268	ZNF493	19	rs1012040	21489612	T	C	0.238806	0.157729	0.032751	7.30291e-06	0.00349304	0.022623	FALSE
Glu-UL	ENSG00000269237		19	rs10405716	21401562	G	A	0.485075	-0.572466	0.0396258	1.69493e-23	3.30111e-18	7.73077e-16	FALSE
Glu-UL	ENSG00000197013	ZNF429	19	rs62111480	21472434	T	C	0.223881	0.361434	0.0338163	8.41261e-17	2.7128e-12	1.65405e-10	FALSE
Glu-UL	ENSG00000304629		19	rs67876192	21570287	A	C	0.358209	-0.425534	0.0554958	4.7483e-11	1.04105e-07	2.542e-06	FALSE
Glu-UL	ENSG00000268081		19	rs12609768	21494519	G	A	0.537313	-1.49323	0.139589	8.08686e-17	3.46226e-12	2.06219e-10	FALSE
Glu-UL	ENSG00000197020	ZNF100	19	rs11671323	21696775	A	G	0.414179	0.216992	0.0250438	5.86434e-13	4.33856e-09	1.42374e-07	FALSE
Glu-UL	ENSG00000197134	ZNF257	19	rs8105767	22032639	A	G	0.25	0.563222	0.0690536	5.52605e-12	2.44679e-08	6.8886e-07	FALSE
Glu-UL	ENSG00000197360	ZNF98	19	rs1391581	22532455	T	G	0.541045	-0.507293	0.103189	4.96491e-06	0.00262723	0.017952	TRUE
Glu-UL	ENSG00000229676	ZNF492	19	rs8102516	22627319	G	A	0.11194	-0.385299	0.0645076	7.00154e-08	7.51287e-05	0.000912906	FALSE
Glu-UL	ENSG00000213973	ZNF99	19	rs56146069	22751817	G	A	0.0783582	0.754837	0.131735	1.91568e-07	0.000169181	0.00182647	FALSE
Glu-UL	ENSG00000183850	ZNF730	19	rs78238303	22932851	C	T	0.0485075	-0.292404	0.0642639	1.99768e-05	0.00729877	0.0401968	FALSE
Glu-UL	ENSG00000269416	LINC01224	19	rs295411	23328191	A	T	0.328358	0.296506	0.0451043	5.51466e-09	5.75805e-06	9.03079e-05	FALSE
Glu-UL	ENSG00000261770		19	rs764366	27859612	C	A	0.164179	0.344727	0.0733065	1.1256e-05	0.00448045	0.0274971	FALSE
Glu-UL	ENSG00000267575	LINC02987	19	rs759045	27765442	T	A	0.817164	0.309117	0.0330592	2.85447e-14	4.74604e-10	1.85948e-08	FALSE
Glu-UL	ENSG00000178904	DPY19L3	19	rs11084637	32404265	C	T	0.533582	0.0899009	0.0165175	6.17835e-07	0.000395025	0.00374809	TRUE
Glu-UL	ENSG00000021488	SLC7A9	19	rs61743316	32875923	C	G	0.19403	-0.363196	0.0544095	3.56936e-09	7.44299e-06	0.00011379	FALSE
Glu-UL	ENSG00000257103	LSM14A	19	rs3097335	34184259	G	A	0.347015	-0.0869134	0.0152217	2.08113e-07	0.00025036	0.00255676	FALSE
Glu-UL	ENSG00000126261	UBA2	19	rs2546050	34860225	A	G	0.798507	0.0695367	0.014833	1.18939e-05	0.00687807	0.03856	TRUE
Glu-UL	ENSG00000168661	ZNF30	19	rs56093013	34927278	G	A	0.257463	-0.168447	0.034998	7.38544e-06	0.00701734	0.0391703	TRUE
Glu-UL	ENSG00000153902	LGI4	19	rs1688002	35136564	C	G	0.354478	-0.451817	0.0417522	4.74393e-17	7.46937e-13	4.96556e-11	FALSE
Glu-UL	ENSG00000307882		19	rs107068	35713788	A	G	0.470149	0.430542	0.0426761	1.12863e-15	1.25034e-11	6.53999e-10	FALSE
Glu-UL	ENSG00000293484	TEX14BP	19	rs231216	35768592	C	A	0.291045	-0.26413	0.0560428	1.08174e-05	0.00782172	0.0426439	FALSE
Glu-UL	ENSG00000294115		19	rs2918333	36259637	G	A	0.0932836	0.603566	0.065067	3.95809e-14	2.59544e-10	1.05291e-08	FALSE
Glu-UL	ENSG00000167635	ZNF146	19	rs2972539	36242140	G	A	0.384328	0.121451	0.0219718	4.3821e-07	0.000282254	0.00281823	FALSE
Glu-UL	ENSG00000232677	LINC00665	19	rs3111556	36330296	T	G	0.201493	0.518796	0.0546598	1.53682e-14	1.96332e-10	7.99624e-09	FALSE
Glu-UL	ENSG00000186017	ZNF566	19	rs1148393	36767716	C	T	0.283582	0.0939041	0.0207266	2.14778e-05	0.00773112	0.0422741	FALSE
Glu-UL	ENSG00000254004	ZNF260	19	rs75887709	36947427	A	G	0.104478	-0.260163	0.037343	1.01389e-09	1.37952e-06	2.57985e-05	FALSE
Glu-UL	ENSG00000198453	ZNF568	19	rs1363753	36997579	G	C	0.600746	0.14693	0.0155253	1.73387e-14	1.80983e-10	7.42985e-09	FALSE
Glu-UL	ENSG00000196967	ZNF585A	19	rs1047333	37151263	G	A	0.380597	-0.0899209	0.0185824	6.68441e-06	0.00154868	0.0115889	FALSE
Glu-UL	ENSG00000226686	LINC01535	19	rs12975869	37244426	G	T	0.134328	-0.311874	0.0615419	2.75102e-06	0.000813207	0.00679051	FALSE
Glu-UL	ENSG00000188227	ZNF793	19	rs3848625	37797025	T	A	0.574627	-0.102927	0.0185062	3.81372e-07	0.000138302	0.00153567	FALSE
Glu-UL	ENSG00000120784	ZFP30	19	rs62108306	37691789	C	T	0.429104	-0.0897473	0.0109394	4.47631e-12	1.61288e-08	4.70808e-07	TRUE
Glu-UL	ENSG00000293171		19	rs2075284	37698715	T	C	0.80597	-0.332745	0.0710219	1.20245e-05	0.00427162	0.0265051	FALSE
Glu-UL	ENSG00000291089		19	rs3865514	37950327	T	A	0.574627	0.14615	0.024319	6.00558e-08	4.70687e-05	0.000598774	FALSE
Glu-UL	ENSG00000099338	CATSPERG	19	rs7253827	38324046	A	G	0.0522388	0.164078	0.0352767	1.36682e-05	0.00724213	0.0400132	FALSE
Glu-UL	ENSG00000269547		19	rs2053071	38900291	C	G	0.414179	-0.195083	0.0362346	7.83209e-07	0.000739623	0.00628298	TRUE
Glu-UL	ENSG00000161243	FBXO27	19	rs662202	39046063	C	T	0.283582	-0.30784	0.0459751	3.26735e-09	4.6514e-06	7.52419e-05	FALSE
Glu-UL	ENSG00000130669	PAK4	19	rs4803207	39129234	G	C	0.406716	-0.0887571	0.0186576	9.14483e-06	0.00632893	0.0360901	FALSE
Glu-UL	ENSG00000179134	SAMD4B	19	rs55811458	39351756	G	A	0.0671642	-0.174464	0.0278505	2.05887e-08	3.49078e-05	0.000460561	TRUE
Glu-UL	ENSG00000275395	FCGBP	19	rs10422312	39871933	A	G	0.649254	0.632204	0.0648184	4.87277e-15	3.13404e-11	1.51615e-09	FALSE
Glu-UL	ENSG00000309093		19	rs80088924	39943205	G	A	0.0746269	0.466505	0.088898	1.35091e-06	0.0010483	0.00835419	FALSE
Glu-UL	ENSG00000197782	ZNF780A	19	rs337801	40085964	A	G	0.134328	0.298472	0.0571524	1.4936e-06	0.00166578	0.0123309	FALSE
Glu-UL	ENSG00000296190		19	rs35555615	39972455	T	C	0.0485075	0.58567	0.104623	3.29115e-07	0.00024902	0.00254813	FALSE
Glu-UL	ENSG00000090006	LTBP4	19	rs11668582	40621908	C	T	0.410448	-0.15292	0.0275071	3.85183e-07	0.000404026	0.00381594	FALSE
Glu-UL	ENSG00000268797		19	rs4803363	40746214	G	T	0.634328	-0.126939	0.0246389	1.97432e-06	0.00178528	0.0131306	FALSE
Glu-UL	ENSG00000167637	ZNF283	19	rs6509118	43804707	T	C	0.69403	-0.152992	0.0256284	7.0991e-08	9.60748e-05	0.001134	TRUE
Glu-UL	ENSG00000204920	ZNF155	19	rs11878420	43957194	T	G	0.828358	0.140096	0.0277069	2.87597e-06	0.00260434	0.0178074	FALSE
Glu-UL	ENSG00000159915	ZNF233	19	rs7249559	44320719	C	G	0.69403	0.283313	0.0485819	1.25922e-07	0.000167907	0.00181548	FALSE
Glu-UL	ENSG00000186567	CEACAM19	19	rs714948	44662645	A	C	0.902985	-0.32468	0.0467257	1.0971e-09	2.24584e-06	3.91375e-05	FALSE
Glu-UL	ENSG00000267922		19	rs77275585	46462219	G	A	0.141791	0.267293	0.0566902	1.07368e-05	0.00843688	0.0451145	FALSE
Glu-UL	ENSG00000181027	FKRP	19	rs11671189	46760253	A	T	0.242537	-0.268246	0.0296578	1.09622e-13	1.01963e-09	3.73897e-08	TRUE
Glu-UL	ENSG00000160007	ARHGAP35	19	rs312186	46839460	C	T	0.152985	0.0760507	0.0119333	1.29889e-08	1.95541e-05	0.000273393	FALSE
Glu-UL	ENSG00000197405	C5AR1	19	rs10417049	47268930	T	A	0.36194	-0.333972	0.0572105	1.22865e-07	0.000126529	0.0014249	FALSE
Glu-UL	ENSG00000105499	PLA2G4C	19	rs34909809	48163726	G	A	0.179104	0.350491	0.0646248	6.67852e-07	0.000817008	0.00681121	FALSE
Glu-UL	ENSG00000177380	PPFIA3	19	rs4802565	49128822	C	A	0.615672	-0.121312	0.0200865	5.30217e-08	6.45079e-05	0.000802784	FALSE
Glu-UL	ENSG00000130529	TRPM4	19	rs11882563	49158290	A	G	0.164179	0.226766	0.0450733	3.17534e-06	0.00230736	0.0161519	TRUE
Glu-UL	ENSG00000161618	ALDH16A1	19	rs2293009	49464423	G	A	0.36194	0.2877	0.0488087	9.70634e-08	9.58547e-05	0.00113269	FALSE
Glu-UL	ENSG00000126457	PRMT1	19	rs1320301	49439175	C	T	0.235075	0.145394	0.0309594	1.15256e-05	0.00606446	0.0348703	FALSE
Glu-UL	ENSG00000104946	TBC1D17	19	rs976282	50065551	A	C	0.272388	-0.111413	0.0239008	1.31465e-05	0.00847717	0.0452829	FALSE
Glu-UL	ENSG00000301908		19	rs12978973	50022997	A	G	0.268657	0.291246	0.0514077	2.49724e-07	0.000341725	0.00331877	FALSE
Glu-UL	ENSG00000287001		19	rs10406070	50209151	T	C	0.0597015	0.615821	0.120919	2.49236e-06	0.00213702	0.0151447	FALSE
Glu-UL	ENSG00000213023	SYT3	19	rs2387137	50634403	C	T	0.791045	-0.229934	0.0436947	1.27442e-06	0.00184056	0.0134222	FALSE
Glu-UL	ENSG00000267827		19	rs35322037	52152450	A	C	0.152985	-0.305449	0.0409888	1.22375e-10	5.90198e-07	1.21631e-05	FALSE
Glu-UL	ENSG00000167555	ZNF528	19	rs11666930	52432921	C	T	0.865672	-0.193013	0.0362534	9.96056e-07	0.00142868	0.01083	FALSE
Glu-UL	ENSG00000198633	ZNF534	19	rs80078717	52425472	A	G	0.100746	0.58017	0.0754745	4.36582e-11	1.73481e-07	3.96362e-06	FALSE
Glu-UL	ENSG00000290073		19	rs10401627	52601348	G	C	0.481343	-0.146577	0.0291563	3.22238e-06	0.00754324	0.0413663	TRUE
Glu-UL	ENSG00000167766	ZNF83	19	rs3745108	52690517	A	G	0.600746	-0.166308	0.0289842	1.85439e-07	0.000350601	0.00339537	TRUE
Glu-UL	ENSG00000269825		19	rs3745108	52690517	A	G	0.600746	-0.170808	0.031221	5.51328e-07	0.000935611	0.00764533	TRUE
Glu-UL	ENSG00000213020	ZNF611	19	rs11084188	52733939	T	C	0.645522	0.142231	0.0193604	1.94188e-10	1.45251e-06	2.69148e-05	TRUE
Glu-UL	ENSG00000198538	ZNF28	19	rs10404114	52817918	G	A	0.716418	0.159723	0.0323849	4.66871e-06	0.00931758	0.0487611	FALSE
Glu-UL	ENSG00000182986	ZNF320	19	rs3810115	52897507	C	A	0.440298	-0.246162	0.0296939	3.06363e-12	1.75291e-08	5.0737e-07	TRUE
Glu-UL	ENSG00000160336	ZNF761	19	rs2865700	53426725	A	T	0.522388	-0.211255	0.0318882	4.4308e-09	1.21582e-05	0.000178464	FALSE
Glu-UL	ENSG00000160336	ZNF761	19	rs2865700	53426725	A	T	0.522388	-0.211255	0.0318882	4.4308e-09	1.21582e-05	0.000178464	FALSE
Glu-UL	ENSG00000293186		19	rs1284537	53505740	G	A	0.735075	-0.515746	0.0676217	5.68327e-11	2.00893e-07	4.50991e-06	FALSE
Glu-UL	ENSG00000105619	TFPT	19	rs62145066	53952002	G	C	0.0671642	-0.300021	0.056298	9.75577e-07	0.00148884	0.0111981	FALSE
Glu-UL	ENSG00000167608	TMC4	19	rs653560	54173409	C	G	0.223881	0.338316	0.0555023	4.19204e-08	0.00012781	0.00143306	FALSE
Glu-UL	ENSG00000170889	RPS9	19	rs2304523	54207390	G	T	0.231343	-0.347172	0.0474232	2.17318e-10	9.05793e-07	1.77443e-05	FALSE
Glu-UL	ENSG00000022556	NLRP2	19	rs514148	54963134	A	G	0.455224	0.67977	0.112146	4.83567e-08	8.14651e-05	0.000981797	FALSE
Glu-UL	ENSG00000129990	SYT5	19	rs3786866	55172856	G	A	0.347015	0.202279	0.0384561	1.28613e-06	0.00176458	0.0129876	TRUE
Glu-UL	ENSG00000179954	SSC5D	19	rs62130160	55489529	G	T	0.13806	0.514206	0.091696	3.16186e-07	0.000583741	0.00512351	FALSE
Glu-UL	ENSG00000286125		19	rs7255276	56747548	C	T	0.0485075	0.366987	0.0630943	1.34083e-07	0.000414013	0.00387826	FALSE
Glu-UL	ENSG00000306458		19	rs740400	57175436	C	T	0.123134	0.498645	0.0648489	4.32074e-11	1.56567e-07	3.60113e-06	FALSE
Glu-UL	ENSG00000268163		19	rs975804	57511135	T	C	0.548507	-0.157243	0.0245403	1.12123e-08	1.90284e-05	0.000267494	FALSE
Glu-UL	ENSG00000105136	ZNF419	19	rs10405910	57449823	A	T	0.279851	-0.207095	0.0367301	2.79066e-07	0.000366665	0.00352719	FALSE
Glu-UL	ENSG00000083828	ZNF586	19	rs6510103	57797333	G	T	0.440298	-0.113193	0.0176772	1.14144e-08	2.08787e-05	0.000289166	FALSE
Glu-UL	ENSG00000177025	C19orf18	19	rs28510888	57821191	A	C	0.261194	0.217554	0.0445678	5.6779e-06	0.00331711	0.0216605	FALSE
Glu-UL	ENSG00000176293	ZNF135	19	rs1544888	58059544	T	G	0.291045	0.134203	0.0277723	6.86068e-06	0.00432888	0.0267742	TRUE
Glu-UL	ENSG00000198131	ZNF544	19	rs171851	58247534	A	G	0.156716	-0.152436	0.0173348	3.31722e-13	2.74352e-09	9.61562e-08	FALSE
Glu-UL	ENSG00000171574	ZNF584	19	rs10417092	58403826	G	A	0.268657	0.205226	0.0248817	3.68662e-12	9.60769e-09	2.93768e-07	FALSE
Glu-UL	ENSG00000268912		19	rs7409473	58427798	A	G	0.503731	-0.25593	0.0469581	5.99611e-07	0.000416603	0.00389898	FALSE
Glu-UL	ENSG00000131849	ZNF132	19	rs9304814	58440444	C	A	0.481343	-0.256821	0.0459715	3.4475e-07	0.000254481	0.0025937	TRUE
Glu-UL	ENSG00000249471	ZNF324B	19	rs157365	58163389	A	G	0.406716	-0.157743	0.0338635	1.3311e-05	0.00587933	0.0340615	FALSE
Glu-UL	ENSG00000083807	SLC27A5	19	rs1550813	58578860	C	T	0.630597	-0.163652	0.0306234	9.19195e-07	0.000499908	0.00454649	FALSE
Glu-UL	ENSG00000223751		2	rs6725467	733622	G	A	0.242537	0.74318	0.0534022	1.34559e-22	2.52895e-17	4.49292e-15	FALSE
Glu-UL	ENSG00000227713		2	rs4854287	869815	T	C	0.470149	0.462663	0.0667219	1.16787e-09	5.09467e-06	8.11387e-05	FALSE
Glu-UL	ENSG00000237667	LINC01115	2	rs4854287	869815	T	C	0.470149	0.774209	0.091566	1.4775e-12	1.63046e-08	4.74594e-07	FALSE
Glu-UL	ENSG00000298835		2	rs4854287	869815	T	C	0.470149	0.772187	0.103855	1.31705e-10	6.26809e-07	1.26643e-05	FALSE
Glu-UL	ENSG00000172554	SNTG2	2	rs62107446	1132246	T	C	0.58209	0.438885	0.0643653	1.92455e-09	4.71904e-06	7.62166e-05	FALSE
Glu-UL	ENSG00000115705	TPO	2	rs4971464	1124588	G	A	0.380597	-0.419556	0.0705236	7.73087e-08	0.000109512	0.00126365	FALSE
Glu-UL	ENSG00000130508	PXDN	2	rs10164792	1749603	G	A	0.313433	-0.170976	0.0256768	3.83077e-09	8.79733e-06	0.000132918	FALSE
Glu-UL	ENSG00000118004	COLEC11	2	rs2071639	3580793	C	A	0.123134	1.74105	0.0836866	4.12654e-33	1.81859e-26	2.08214e-23	FALSE
Glu-UL	ENSG00000302210		2	rs78890133	6989308	T	G	0.317164	-0.273615	0.0523237	1.45333e-06	0.00116933	0.00912113	FALSE
Glu-UL	ENSG00000229727		2	rs309315	7007824	C	T	0.313433	-0.172545	0.0370415	1.33138e-05	0.00899377	0.0475495	TRUE
Glu-UL	ENSG00000119185	ITGB1BP1	2	rs11692768	9413034	G	A	0.220149	-0.12458	0.0232639	8.79418e-07	0.000780644	0.00655883	FALSE
Glu-UL	ENSG00000134330	IAH1	2	rs34118021	9453754	G	T	0.429104	-0.0926753	0.0174455	1.04386e-06	0.00103816	0.00828617	FALSE
Glu-UL	ENSG00000271855		2	rs62117542	9504719	G	A	0.0746269	0.455421	0.0751666	4.88952e-08	6.7083e-05	0.000828824	FALSE
Glu-UL	ENSG00000151694	ADAM17	2	rs4476322	9541811	C	G	0.705224	0.129647	0.0180062	3.67775e-10	1.01244e-06	1.96098e-05	FALSE
Glu-UL	ENSG00000115750	TAF1B	2	rs10803706	9893621	C	T	0.36194	0.10656	0.0163597	7.13469e-09	1.91282e-05	0.00026853	FALSE
Glu-UL	ENSG00000115761	NOL10	2	rs62127226	10685311	G	A	0.0485075	0.24368	0.039287	2.67238e-08	8.1562e-05	0.000981817	FALSE
Glu-UL	ENSG00000271952	LINC01954	2	rs34414864	10839362	G	T	0.369403	1.00782	0.0522493	5.24411e-31	5.76443e-25	5.39982e-22	FALSE
Glu-UL	ENSG00000134324	LPIN1	2	rs3795974	11784824	T	C	0.660448	0.0930977	0.0178491	1.53312e-06	0.00179436	0.0131581	TRUE
Glu-UL	ENSG00000287291		2	rs4668904	15403518	C	G	0.671642	-0.172981	0.0366738	1.06652e-05	0.00598775	0.0345267	FALSE
Glu-UL	ENSG00000151779	NBAS	2	rs12995845	15380415	C	T	0.701493	-0.109753	0.0131844	2.63164e-12	1.95297e-08	5.62119e-07	TRUE
Glu-UL	ENSG00000304698		2	rs7587775	18560992	T	C	0.395522	0.226359	0.0423122	8.98376e-07	0.00100564	0.00807904	TRUE
Glu-UL	ENSG00000306962		2	rs10187524	19909003	T	C	0.436567	0.214172	0.0426095	3.23349e-06	0.00304682	0.020255	FALSE
Glu-UL	ENSG00000173960	UBXN2A	2	rs4665244	23879821	A	G	0.656716	0.122447	0.0172267	5.49307e-10	1.83498e-06	3.26564e-05	FALSE
Glu-UL	ENSG00000219626	FAM228B	2	rs2551346	23689081	T	A	0.156716	0.0923056	0.0204442	2.27609e-05	0.00921751	0.0485161	FALSE
Glu-UL	ENSG00000276087		2	rs2042468	24175577	A	T	0.58209	-0.185148	0.0330153	3.15878e-07	0.000266303	0.00269097	FALSE
Glu-UL	ENSG00000138031	ADCY3	2	rs11682506	24505272	C	T	0.175373	0.0691551	0.0143951	7.64401e-06	0.00354884	0.0228961	FALSE
Glu-UL	ENSG00000171303	KCNK3	2	rs72808908	27019893	C	T	0.141791	0.35236	0.063844	4.5359e-07	0.000299004	0.00295398	FALSE
Glu-UL	ENSG00000084734	GCKR	2	rs7562296	27469764	A	G	0.925373	-0.37124	0.0848343	3.79984e-05	0.00672814	0.0378843	FALSE
Glu-UL	ENSG00000243943	ZNF512	2	rs13409819	28070432	C	A	0.567164	-0.0707995	0.0162611	4.11989e-05	0.00734763	0.0404443	FALSE
Glu-UL	ENSG00000115295	CLIP4	2	rs13006908	29065559	A	G	0.257463	0.165835	0.0273723	4.89637e-08	0.000105994	0.00123271	TRUE
Glu-UL	ENSG00000172954	LCLAT1	2	rs1723175	30444834	C	T	0.231343	0.0946371	0.0162601	1.32036e-07	0.000187472	0.0019874	FALSE
Glu-UL	ENSG00000230876	LINC00486	2	rs4952305	32834697	C	G	0.216418	0.185685	0.0254918	2.55021e-10	2.14354e-06	3.76921e-05	FALSE
Glu-UL	ENSG00000049323	LTBP1	2	rs150715	32943336	T	C	0.421642	0.153193	0.031287	5.35982e-06	0.00694349	0.0388284	FALSE
Glu-UL	ENSG00000302327		2	rs2052627	36347832	C	G	0.529851	-0.276698	0.0549364	3.10586e-06	0.0035516	0.0228961	FALSE
Glu-UL	ENSG00000218739	CEBPZOS	2	rs11682607	37292625	C	T	0.335821	0.127921	0.021077	4.68101e-08	9.05472e-05	0.00107988	FALSE
Glu-UL	ENSG00000115825	PRKD3	2	rs7589296	37233557	G	A	0.358209	0.164752	0.0221206	1.24596e-10	4.76884e-07	9.98766e-06	FALSE
Glu-UL	ENSG00000115841	RMDN2	2	rs74753841	37925698	C	G	0.242537	0.451291	0.0347206	5.306e-21	1.18809e-15	1.5114e-13	TRUE
Glu-UL	ENSG00000231367	LINC02613	2	rs372139	38612181	G	A	0.369403	-0.208128	0.0368288	2.6467e-07	0.000397126	0.00375765	FALSE
Glu-UL	ENSG00000307331		2	rs4952935	42781206	A	G	0.768657	-0.256604	0.0446677	1.80291e-07	0.000322486	0.00316473	FALSE
Glu-UL	ENSG00000205054	LINC01121	2	rs3770255	45442605	C	T	0.0559702	0.564092	0.108003	1.49028e-06	0.00251948	0.0173423	FALSE
Glu-UL	ENSG00000250565	ATP6V1E2	2	rs6719054	46515426	C	A	0.466418	0.213526	0.0366167	1.26061e-07	0.000286408	0.00285142	FALSE
Glu-UL	ENSG00000119878	CRIPT	2	rs1080871	46627569	A	G	0.492537	-0.264969	0.0242933	3.28461e-17	7.65967e-13	5.05943e-11	FALSE
Glu-UL	ENSG00000068724	TTC7A	2	rs7595101	46946549	A	G	0.134328	0.114654	0.0235234	5.84218e-06	0.00650757	0.0369656	FALSE
Glu-UL	ENSG00000119888	EPCAM	2	rs4952884	47363623	C	T	0.0597015	0.621231	0.113997	6.01161e-07	0.00078855	0.0066114	FALSE
Glu-UL	ENSG00000095002	MSH2	2	rs113398923	47400522	G	A	0.205224	0.170966	0.0255104	3.18365e-09	7.1713e-06	0.000109799	FALSE
Glu-UL	ENSG00000116062	MSH6	2	rs3764960	47471245	G	A	0.317164	0.13195	0.0248267	1.03308e-06	0.00113563	0.00889191	FALSE
Glu-UL	ENSG00000170802	FOXN2	2	rs79073127	48346756	G	C	0.156716	0.386129	0.0388813	2.24346e-15	6.11359e-11	2.81232e-09	FALSE
Glu-UL	ENSG00000243244	STON1	2	rs2140551	48595242	G	A	0.496269	0.128294	0.0265815	7.01557e-06	0.00706804	0.0393043	FALSE
Glu-UL	ENSG00000242441	GTF2A1L	2	rs2140551	48595242	G	A	0.496269	0.882601	0.0588144	1.97704e-24	5.36137e-19	1.56959e-16	FALSE
Glu-UL	ENSG00000282890		2	rs2140551	48595242	G	A	0.496269	0.791011	0.0658612	3.08643e-19	1.90103e-14	1.71831e-12	FALSE
Glu-UL	ENSG00000170634	ACYP2	2	rs72904908	53990011	G	C	0.380597	0.12931	0.0210702	3.52036e-08	6.07377e-05	0.000760457	FALSE
Glu-UL	ENSG00000237651	C2orf74	2	rs11125870	61152490	G	C	0.365672	0.339829	0.0291605	1.37568e-18	1.80184e-13	1.32618e-11	FALSE
Glu-UL	ENSG00000237638	LINC02245	2	rs35761739	64978174	G	A	0.0746269	0.219753	0.0302682	2.83053e-10	1.70306e-06	3.05726e-05	FALSE
Glu-UL	ENSG00000293332		2	rs11897957	65237309	C	T	0.335821	-0.328671	0.0315813	2.83082e-16	2.98727e-12	1.81068e-10	FALSE
Glu-UL	ENSG00000236780	LINC01829	2	rs12474076	67372513	A	T	0.619403	0.147759	0.0302298	5.53856e-06	0.00597956	0.0345086	FALSE
Glu-UL	ENSG00000169604	ANTXR1	2	rs7599536	69169821	A	G	0.182836	0.120766	0.0180454	3.31607e-09	5.63784e-06	8.91007e-05	TRUE
Glu-UL	ENSG00000196975	ANXA4	2	rs4852867	69604317	G	A	0.347015	0.173717	0.0308402	2.85382e-07	0.000192946	0.00203081	FALSE
Glu-UL	ENSG00000293615		2	rs6711147	69976897	C	T	0.123134	-0.138694	0.0197059	7.43918e-10	1.20827e-06	2.2971e-05	FALSE
Glu-UL	ENSG00000116127	ALMS1	2	rs6706235	73386430	C	G	0.358209	0.110358	0.0144924	5.99071e-11	1.37776e-07	3.21922e-06	TRUE
Glu-UL	ENSG00000290727	ALMS1P1	2	rs7607014	73503047	A	G	0.291045	0.306534	0.0406841	8.52581e-11	1.44747e-07	3.3517e-06	FALSE
Glu-UL	ENSG00000217702		2	rs1723289	74120467	G	C	0.399254	0.298941	0.0411466	2.76849e-10	6.06217e-07	1.23695e-05	TRUE
Glu-UL	ENSG00000115275	MOGS	2	rs7556852	74442388	G	T	0.208955	0.207381	0.0385473	7.95882e-07	0.000548862	0.0048924	TRUE
Glu-UL	ENSG00000309281		2	rs12366	74958729	G	T	0.373134	2.14703	0.128934	4.49743e-27	1.64119e-21	7.04633e-19	TRUE
Glu-UL	ENSG00000306831		2	rs7589773	75039114	A	G	0.440298	0.246885	0.0407704	4.95858e-08	8.94535e-05	0.00106932	FALSE
Glu-UL	ENSG00000005436	GCFC2	2	rs7584389	75634660	A	G	0.541045	0.111125	0.0210076	1.14219e-06	0.00123325	0.00951886	FALSE
Glu-UL	ENSG00000231781		2	rs1346859	82097849	T	C	0.742537	0.193958	0.0425172	1.91132e-05	0.00656029	0.0370821	TRUE
Glu-UL	ENSG00000115423	DNAH6	2	rs13390654	84336485	A	G	0.41791	0.174045	0.0330712	1.27211e-06	0.000621772	0.00540665	FALSE
Glu-UL	ENSG00000152292	SH2D6	2	rs56017561	85431870	T	C	0.429104	-0.278809	0.0411018	2.24088e-09	5.18705e-06	8.23554e-05	TRUE
Glu-UL	ENSG00000068654	POLR1A	2	rs10187547	86085151	C	T	0.764925	0.112688	0.0155692	3.12008e-10	7.89113e-07	1.56973e-05	FALSE
Glu-UL	ENSG00000068615	REEP1	2	rs2002250	86220361	C	T	0.421642	0.0536788	0.00994956	7.48736e-07	0.000408628	0.00384881	FALSE
Glu-UL	ENSG00000115561	CHMP3	2	rs55866634	86458999	G	A	0.145522	0.105491	0.0232592	2.10933e-05	0.00531542	0.0312192	FALSE
Glu-UL	ENSG00000153561	RMND5A	2	rs2063848	86742648	G	T	0.649254	-0.123186	0.0258469	8.84238e-06	0.00224447	0.0158191	FALSE
Glu-UL	ENSG00000288734		2	rs10198979	88169585	A	T	0.723881	0.407359	0.0574354	5.87665e-10	8.79839e-07	1.73348e-05	FALSE
Glu-UL	ENSG00000259916	AQP7B	2	rs10191464	94876367	C	T	0.347015	0.172273	0.04613	0.000361397	0.00705268	0.0392613	FALSE
Glu-UL	ENSG00000144026	ZNF514	2	rs3112989	95079375	G	A	0.526119	0.182028	0.0340242	8.97529e-07	8.41496e-05	0.00100943	FALSE
Glu-UL	ENSG00000233757	ZNF892	2	rs2113417	95334108	G	A	0.757463	0.123964	0.0187	4.35054e-09	9.79569e-07	1.90447e-05	TRUE
Glu-UL	ENSG00000135976	ANKRD36	2	rs13009263	97556164	C	T	0.623134	0.187882	0.0197676	1.45057e-14	8.15467e-11	3.66933e-09	FALSE
Glu-UL	ENSG00000277701		2	rs7578377	97127587	G	A	0.712687	0.649589	0.0477789	4.79786e-22	4.28773e-17	7.10864e-15	FALSE
Glu-UL	ENSG00000196912	ANKRD36B	2	rs13406858	97598110	T	C	0.61194	-0.249861	0.0222467	8.22339e-18	1.52669e-13	1.15672e-11	FALSE
Glu-UL	ENSG00000241962		2	rs13022798	99239915	G	A	0.813433	-0.104024	0.022633	1.68152e-05	0.00521456	0.030792	FALSE
Glu-UL	ENSG00000135951	TSGA10	2	rs12987548	99095829	C	T	0.570895	0.267314	0.0233103	3.01755e-18	8.01415e-14	6.38619e-12	FALSE
Glu-UL	ENSG00000236141		2	rs1441097	103841472	C	T	0.220149	0.246351	0.0390253	1.67814e-08	1.34382e-05	0.00019558	FALSE
Glu-UL	ENSG00000295972		2	rs73946472	104517320	G	A	0.130597	0.459658	0.0996374	1.57632e-05	0.00607442	0.0348703	FALSE
Glu-UL	ENSG00000302943		2	rs35611917	105858392	G	A	0.257463	0.310164	0.0576881	8.06618e-07	0.00101361	0.0081028	FALSE
Glu-UL	ENSG00000303047		2	rs6748743	106908960	G	C	0.156716	-0.314051	0.0649485	6.77929e-06	0.00389677	0.0247097	FALSE
Glu-UL	ENSG00000309169		2	rs17033473	106900682	C	T	0.119403	-0.585153	0.0715794	5.09162e-12	2.09852e-08	6.00658e-07	FALSE
Glu-UL	ENSG00000135968	GCC2	2	rs1474220	108450343	G	T	0.585821	-0.191521	0.0153235	4.08185e-20	8.51734e-15	8.77648e-13	FALSE
Glu-UL	ENSG00000204588	LINC01123	2	rs10207734	110095121	G	C	0.902985	-0.431769	0.0886885	5.97106e-06	0.00193428	0.0139868	FALSE
Glu-UL	ENSG00000144152	FBLN7	2	rs4848280	112181626	C	T	0.141791	0.250149	0.0495183	2.92934e-06	0.00164478	0.0122105	TRUE
Glu-UL	ENSG00000169629	RGPD8	2	rs3961919	112485744	G	A	0.455224	-0.239688	0.0336742	5.26261e-10	1.4499e-06	2.69148e-05	FALSE
Glu-UL	ENSG00000125630	POLR1B	2	rs7586558	112046816	C	T	0.313433	-0.108098	0.0220958	5.44629e-06	0.00430803	0.0266773	FALSE
Glu-UL	ENSG00000243389		2	rs41278942	112588903	G	A	0.119403	-0.266628	0.053923	4.44661e-06	0.00268969	0.0183141	TRUE
Glu-UL	ENSG00000309398		2	rs34015418	112630867	C	G	0.171642	-0.488116	0.0755414	8.9078e-09	1.55571e-05	0.000222028	FALSE
Glu-UL	ENSG00000125618	PAX8	2	rs7421852	113232684	G	A	0.343284	-0.518964	0.0722608	3.98367e-10	1.27429e-06	2.40487e-05	FALSE
Glu-UL	ENSG00000136682	ZNG1B	2	rs12622933	113423918	T	C	0.223881	-0.327146	0.0298761	2.73195e-17	1.61177e-12	1.038e-10	FALSE
Glu-UL	ENSG00000115084	SLC35F5	2	rs13393663	113698350	T	C	0.458955	-0.0919073	0.0155084	8.50299e-08	9.38167e-05	0.00111372	FALSE
Glu-UL	ENSG00000298065		2	rs7575653	117624007	T	C	0.880597	-1.31382	0.167292	2.0992e-11	7.09158e-08	1.79541e-06	FALSE
Glu-UL	ENSG00000088205	DDX18	2	rs6705667	117866488	A	G	0.55597	0.110049	0.0195948	3.05375e-07	0.000289519	0.00287129	FALSE
Glu-UL	ENSG00000297418		2	rs7589375	118085358	T	C	0.235075	0.259407	0.0500121	1.71948e-06	0.0013775	0.0104831	FALSE
Glu-UL	ENSG00000136717	BIN1	2	rs76516995	127107345	C	G	0.190299	-0.37005	0.056599	6.42496e-09	9.70887e-06	0.000145411	TRUE
Glu-UL	ENSG00000286957		2	rs6721214	129870944	A	G	0.141791	0.441702	0.0850803	1.68778e-06	0.000884463	0.00730266	TRUE
Glu-UL	ENSG00000136710	CCDC115	2	rs12995651	130238876	T	G	0.268657	0.228768	0.0490659	1.30986e-05	0.00287891	0.0194015	FALSE
Glu-UL	ENSG00000293311	SMPD4BP	2	rs12053117	131431493	C	T	0.197761	-0.257025	0.0290379	2.5711e-13	1.12612e-09	4.1003e-08	FALSE
Glu-UL	ENSG00000287151	LINC03124	2	rs6720375	131682500	G	C	0.585821	0.401678	0.0406695	2.84403e-15	2.02072e-11	1.01571e-09	TRUE
Glu-UL	ENSG00000227745		2	rs62165007	132256558	G	A	0.0970149	-0.725353	0.0853155	1.20162e-12	3.85595e-09	1.30271e-07	FALSE
Glu-UL	ENSG00000163046	ANKRD30BL	2	rs62165007	132256558	G	A	0.0970149	-0.57726	0.0607092	1.42477e-14	1.76859e-10	7.31888e-09	FALSE
Glu-UL	ENSG00000286679		2	rs13005451	155638498	A	T	0.100746	0.634593	0.128571	4.60225e-06	0.00324212	0.0212609	FALSE
Glu-UL	ENSG00000304068		2	rs939240	156219580	T	A	0.854478	-0.484243	0.088323	5.25824e-07	0.000552496	0.00491203	FALSE
Glu-UL	ENSG00000226383	LINC01876	2	rs146233246	156257695	G	A	0.283582	0.805053	0.0934107	7.18744e-13	4.39525e-09	1.43777e-07	FALSE
Glu-UL	ENSG00000196151	WDSUB1	2	rs3771684	159345757	C	T	0.0783582	0.200198	0.0434859	1.63389e-05	0.00728369	0.0401352	FALSE
Glu-UL	ENSG00000226266		2	rs34385495	159656372	T	C	0.462687	0.0909314	0.0165257	4.85282e-07	0.000413554	0.00387749	FALSE
Glu-UL	ENSG00000115339	GALNT3	2	rs3791847	165864677	A	T	0.13806	0.384104	0.0442347	5.39696e-13	3.21141e-09	1.11044e-07	FALSE
Glu-UL	ENSG00000144285	SCN1A	2	rs75629463	166127885	A	G	0.0559702	0.589915	0.101589	1.39524e-07	0.000169278	0.00182647	TRUE
Glu-UL	ENSG00000154479	CFAP210	2	rs76487317	169658367	T	C	0.141791	-0.51957	0.0550534	1.9463e-14	1.75783e-10	7.31173e-09	FALSE
Glu-UL	ENSG00000213160	KLHL23	2	rs2288333	169736681	C	G	0.13806	-0.131335	0.0213809	3.43967e-08	5.92789e-05	0.000743095	FALSE
Glu-UL	ENSG00000213160	KLHL23	2	rs2288333	169736681	C	G	0.13806	-0.131335	0.0213809	3.43967e-08	5.92789e-05	0.000743095	FALSE
Glu-UL	ENSG00000077380	DYNC1I2	2	rs35379278	171774219	G	A	0.268657	0.101912	0.018518	4.83429e-07	0.000495225	0.00451586	FALSE
Glu-UL	ENSG00000300766		2	rs35665064	172594360	G	T	0.119403	0.344963	0.069375	3.99075e-06	0.00379266	0.0241835	FALSE
Glu-UL	ENSG00000144306	SCRN3	2	rs11677006	174402340	T	C	0.253731	-0.25845	0.0300261	7.54199e-13	3.87127e-09	1.30361e-07	FALSE
Glu-UL	ENSG00000115935	WIPF1	2	rs78415607	175033912	C	T	0.0485075	0.52587	0.10277	2.26659e-06	0.00170533	0.0126056	FALSE
Glu-UL	ENSG00000018510	AGPS	2	rs10497500	177603020	C	G	0.126866	-0.115166	0.0201208	1.96579e-07	0.000181328	0.00193508	FALSE
Glu-UL	ENSG00000116044	NFE2L2	2	rs58483300	177385000	T	A	0.104478	-0.172478	0.0363311	9.49188e-06	0.00448795	0.0275104	FALSE
Glu-UL	ENSG00000187231	SESTD1	2	rs13421666	179197307	C	T	0.302239	-0.0922165	0.0150014	3.37415e-08	4.8728e-05	0.000618355	FALSE
Glu-UL	ENSG00000287621		2	rs12622384	183268026	G	A	0.373134	-0.171765	0.0361869	9.52022e-06	0.00621433	0.0355152	FALSE
Glu-UL	ENSG00000138448	ITGAV	2	rs3911084	186610630	C	A	0.727612	-0.285922	0.0337128	1.31788e-12	6.94073e-09	2.17383e-07	FALSE
Glu-UL	ENSG00000144369	FAM171B	2	rs7589470	186657679	G	A	0.600746	-0.107944	0.023015	1.17969e-05	0.00383995	0.0244246	FALSE
Glu-UL	ENSG00000288866		2	rs7560722	189388196	C	T	0.951493	-1.14217	0.187863	4.47797e-08	0.000772447	0.00651348	FALSE
Glu-UL	ENSG00000151689	INPP1	2	rs2067454	190371653	A	G	0.242537	0.196578	0.0441973	2.92008e-05	0.0095148	0.0495166	FALSE
Glu-UL	ENSG00000138378	STAT4	2	rs4146105	191245240	G	A	0.272388	-0.43795	0.0485366	1.20578e-13	6.95205e-10	2.64338e-08	TRUE
Glu-UL	ENSG00000128641	MYO1B	2	rs4146105	191245240	G	A	0.272388	-0.284355	0.0444142	1.14632e-08	1.17325e-05	0.000172953	TRUE
Glu-UL	ENSG00000118997	DNAH7	2	rs11902840	196050693	T	C	0.585821	0.34742	0.0617682	2.95161e-07	0.000190069	0.002006	FALSE
Glu-UL	ENSG00000162971	TYW5	2	rs281759	199922996	T	C	0.824627	0.215408	0.042166	2.34266e-06	0.00117036	0.00912231	TRUE
Glu-UL	ENSG00000138380	CARF	2	rs72932553	202977938	C	T	0.0932836	-0.156062	0.0348862	2.65541e-05	0.00508896	0.0302061	FALSE
Glu-UL	ENSG00000138400	MDH1B	2	rs16838834	206765071	T	A	0.175373	0.309189	0.0621991	4.01389e-06	0.00285508	0.0192662	TRUE
Glu-UL	ENSG00000188674	C2orf80	2	rs6739379	208175419	A	T	0.347015	0.190737	0.0385641	4.42306e-06	0.00254681	0.017472	TRUE
Glu-UL	ENSG00000227769		2	rs6749428	214806648	C	T	0.679105	0.305293	0.0654615	1.30381e-05	0.0093806	0.0490411	FALSE
Glu-UL	ENSG00000079246	XRCC5	2	rs7576830	216096472	T	C	0.623134	0.0624643	0.0111418	3.18034e-07	0.000483396	0.00442758	FALSE
Glu-UL	ENSG00000260804	LINC01963	2	rs72956701	216244876	G	A	0.0522388	1.28938	0.141853	8.99766e-14	8.68295e-10	3.2309e-08	FALSE
Glu-UL	ENSG00000138375	SMARCAL1	2	rs62178598	216388319	A	T	0.268657	0.0759196	0.0160298	9.90609e-06	0.00718709	0.0398102	FALSE
Glu-UL	ENSG00000197756	RPL37A	2	rs207884	216207673	G	C	0.574627	-0.144408	0.0271971	1.05467e-06	0.00127395	0.00980368	FALSE
Glu-UL	ENSG00000163466	ARPC2	2	rs1877712	218303709	G	A	0.485075	0.10108	0.0194563	1.6635e-06	0.000962947	0.00782526	FALSE
Glu-UL	ENSG00000144580	CNOT9	2	rs2710246	218669171	T	C	0.365672	0.181656	0.0230142	1.76194e-11	2.54343e-08	7.14116e-07	FALSE
Glu-UL	ENSG00000115568	ZNF142	2	rs13383705	218655878	G	A	0.0746269	0.238885	0.0507925	1.12294e-05	0.00327191	0.0214061	FALSE
Glu-UL	ENSG00000163482	STK36	2	rs694519	218816370	T	C	0.578358	0.0937395	0.0206135	2.01687e-05	0.00554531	0.0323377	FALSE
Glu-UL	ENSG00000135912	TTLL4	2	rs6716635	218641534	G	A	0.578358	-0.113221	0.0225988	3.44665e-06	0.00114411	0.00894867	FALSE
Glu-UL	ENSG00000124006	OBSL1	2	rs55873563	219557307	G	A	0.152985	-0.184753	0.0329751	3.2262e-07	0.000343184	0.0033298	FALSE
Glu-UL	ENSG00000290000		2	rs7426171	221393974	A	C	0.462687	0.297097	0.0469164	1.54251e-08	2.09197e-05	0.000289344	FALSE
Glu-UL	ENSG00000144468	RHBDD1	2	rs35897577	226812605	A	T	0.365672	0.110971	0.0180301	3.26825e-08	3.72665e-05	0.0004898	FALSE
Glu-UL	ENSG00000187957	DNER	2	rs12473885	229704874	G	T	0.119403	0.16811	0.0314981	9.44954e-07	0.000798858	0.00668151	FALSE
Glu-UL	ENSG00000153832	FBXO36	2	rs503926	229823699	C	A	0.529851	-0.113418	0.0210893	8.01989e-07	0.00105733	0.00840018	FALSE
Glu-UL	ENSG00000079263	SP140	2	rs11894286	230132815	G	C	0.735075	-0.17528	0.0366778	8.41638e-06	0.00592033	0.034253	FALSE
Glu-UL	ENSG00000181798	LINC00471	2	rs28685161	231514081	C	T	0.272388	-0.533273	0.0465083	3.0362e-18	6.38466e-14	5.22135e-12	TRUE
Glu-UL	ENSG00000085982	USP40	2	rs62195091	233453156	G	T	0.123134	0.147938	0.0289245	2.28734e-06	0.00211112	0.0150068	FALSE
Glu-UL	ENSG00000130147	SH3BP4	2	rs7564869	234654299	T	C	0.660448	-0.174683	0.0312086	3.29969e-07	0.000524058	0.0047203	FALSE
Glu-UL	ENSG00000157985	AGAP1	2	rs12466302	235674382	G	T	0.235075	-0.0898502	0.0187691	8.15627e-06	0.00683011	0.0383538	FALSE
Glu-UL	ENSG00000132321	IQCA1	2	rs7608458	236805264	A	C	0.641791	-0.267596	0.0524208	2.37793e-06	0.00190153	0.0137984	FALSE
Glu-UL	ENSG00000177483	RBM44	2	rs3769059	237754486	G	A	0.134328	0.37498	0.0634562	9.12643e-08	0.000180899	0.00193364	FALSE
Glu-UL	ENSG00000144485	HES6	2	rs3754729	238241585	T	C	0.339552	-0.286834	0.0537636	9.5272e-07	0.00104999	0.00835987	TRUE
Glu-UL	ENSG00000274346		2	rs507847	238479476	T	C	0.156716	-0.391329	0.0651166	6.00602e-08	0.000100647	0.0011812	FALSE
Glu-UL	ENSG00000144504	ANKMY1	2	rs13394744	240521955	T	A	0.216418	0.163334	0.0227322	3.92646e-10	1.31985e-06	2.48176e-05	FALSE
Glu-UL	ENSG00000006607	FARP2	2	rs6437254	241285665	G	A	0.80597	0.198898	0.0186136	8.50438e-17	4.02838e-12	2.34516e-10	FALSE
Glu-UL	ENSG00000154252	GAL3ST2	2	rs6756901	241767686	A	G	0.55597	0.539952	0.0435935	6.48703e-20	7.48721e-15	7.79293e-13	FALSE
Glu-UL	ENSG00000233806	LINC01237	2	rs62193115	241830235	C	T	0.197761	-0.22157	0.0385501	1.7818e-07	0.000163222	0.00177227	FALSE
Glu-UL	ENSG00000233806	LINC01237	2	rs62193115	241830235	C	T	0.197761	-0.22157	0.0385501	1.7818e-07	0.000163222	0.00177227	FALSE
Glu-UL	ENSG00000196476	C20orf96	20	rs6075567	275932	A	G	0.541045	0.257732	0.0370509	1.06192e-09	2.85763e-06	4.86706e-05	FALSE
Glu-UL	ENSG00000286787		20	rs55878704	1099817	C	T	0.0895522	-0.449042	0.0651526	1.40091e-09	3.39072e-06	5.6811e-05	FALSE
Glu-UL	ENSG00000274322		20	rs1294690	1391053	A	G	0.764925	-0.168634	0.0353606	8.74181e-06	0.00907502	0.0479053	TRUE
Glu-UL	ENSG00000296607		20	rs9575	1445748	C	T	0.384328	0.33183	0.0397599	2.3944e-12	9.94053e-09	3.03046e-07	FALSE
Glu-UL	ENSG00000088882	CPXM1	20	rs13036662	2803407	G	A	0.104478	0.371559	0.0661797	3.07682e-07	0.000363727	0.0035093	FALSE
Glu-UL	ENSG00000303766		20	rs11697186	3204477	A	T	0.0783582	-0.395753	0.0829348	8.64621e-06	0.00587727	0.0340615	TRUE
Glu-UL	ENSG00000101292	PROKR2	20	rs56004120	5373045	G	T	0.130597	-0.416933	0.0849611	5.13713e-06	0.00468803	0.0284073	FALSE
Glu-UL	ENSG00000230563		20	rs1159563	5374936	C	G	0.600746	-0.19129	0.0385766	4.2094e-06	0.00389274	0.0247097	FALSE
Glu-UL	ENSG00000205181	LINC00654	20	rs2024844	5613395	C	T	0.458955	-0.171239	0.0317436	7.50686e-07	0.00112122	0.00881175	FALSE
Glu-UL	ENSG00000171984	SHLD1	20	rs2326660	5745755	C	T	0.175373	-0.173388	0.0320866	7.23067e-07	0.00154708	0.011587	TRUE
Glu-UL	ENSG00000306163		20	rs6035115	18756097	C	T	0.578358	-0.182575	0.0378008	6.92313e-06	0.00485017	0.0291243	FALSE
Glu-UL	ENSG00000132669	RIN2	20	rs12625484	19767092	C	T	0.205224	-0.127788	0.0231786	4.64605e-07	0.000604622	0.00528428	FALSE
Glu-UL	ENSG00000101004	NINL	20	rs2144214	25891238	A	G	0.320896	-0.0778975	0.0145124	8.36088e-07	0.000266633	0.00269097	FALSE
Glu-UL	ENSG00000125804	FAM182A	20	rs4813593	25965529	C	A	0.376866	-0.49526	0.0586013	1.50282e-12	3.67985e-09	1.26598e-07	FALSE
Glu-UL	ENSG00000149599	DUSP15	20	rs947310	31861522	C	G	0.369403	-0.270231	0.0464226	1.31539e-07	6.77616e-05	0.000835205	TRUE
Glu-UL	ENSG00000198547	C20orf203	20	rs6058814	32683223	A	G	0.242537	0.206333	0.0248955	3.09156e-12	1.46183e-08	4.31606e-07	FALSE
Glu-UL	ENSG00000285382		20	rs6058941	32891762	A	G	0.608209	0.101377	0.0194936	1.62883e-06	0.00132973	0.0101721	FALSE
Glu-UL	ENSG00000088305	DNMT3B	20	rs6058900	32812867	T	C	0.473881	0.174903	0.0273401	1.17118e-08	2.74884e-05	0.000371228	FALSE
Glu-UL	ENSG00000250917		20	rs62212343	34609133	C	A	0.11194	0.193957	0.037237	1.57702e-06	0.000709446	0.00606161	FALSE
Glu-UL	ENSG00000100991	TRPC4AP	20	rs6087657	34976886	G	A	0.33209	-0.0926739	0.0116738	1.44293e-11	4.41934e-08	1.19209e-06	FALSE
Glu-UL	ENSG00000126005	MMP24OS	20	rs6060348	35286356	T	G	0.257463	-0.181632	0.0317654	2.01318e-07	0.000117942	0.00133844	FALSE
Glu-UL	ENSG00000125991	ERGIC3	20	rs116678101	35545279	C	T	0.160448	0.288663	0.0301109	1.01165e-14	8.38563e-11	3.75685e-09	FALSE
Glu-UL	ENSG00000149639	MTCL2	20	rs1146261	36858756	C	A	0.462687	0.071404	0.0113587	1.87605e-08	1.51561e-05	0.000216605	FALSE
Glu-UL	ENSG00000101353	MROH8	20	rs62206557	37180220	C	G	0.365672	-0.174899	0.034757	3.16283e-06	0.00179528	0.0131581	FALSE
Glu-UL	ENSG00000101425	BPI	20	rs6123522	38260619	T	G	0.216418	0.338863	0.0550309	3.22831e-08	4.16785e-05	0.000537504	TRUE
Glu-UL	ENSG00000149633	KIAA1755	20	rs6123522	38260619	T	G	0.216418	0.859105	0.0593141	1.46751e-23	2.07442e-18	5.08937e-16	TRUE
Glu-UL	ENSG00000224635		20	rs1626465	38403608	T	C	0.261194	0.721623	0.0566828	1.57304e-20	1.39048e-15	1.7057e-13	FALSE
Glu-UL	ENSG00000300599		20	rs9798509	39034960	A	G	0.123134	0.419924	0.0537972	2.59045e-11	7.25352e-08	1.83191e-06	FALSE
Glu-UL	ENSG00000300834		20	rs12625203	39029514	T	C	0.119403	0.397956	0.069894	2.22365e-07	0.000183714	0.00195763	FALSE
Glu-UL	ENSG00000185513	L3MBTL1	20	rs57208610	43520387	T	C	0.477612	0.109025	0.0201556	7.07382e-07	0.000704418	0.00602865	TRUE
Glu-UL	ENSG00000168734	PKIG	20	rs74635876	44553266	G	A	0.0597015	0.168983	0.0332843	2.65256e-06	0.00197343	0.0142201	FALSE
Glu-UL	ENSG00000286100		20	rs16989483	44908559	T	C	0.335821	-0.891499	0.08074	1.84703e-17	1.66629e-13	1.24943e-11	FALSE
Glu-UL	ENSG00000182931	WFDC10B	20	rs422592	45765779	T	A	0.619403	-0.217263	0.0467156	1.36904e-05	0.00746086	0.0409582	FALSE
Glu-UL	ENSG00000101473	ACOT8	20	rs4812972	45874460	T	C	0.641791	-0.118888	0.0200959	8.87344e-08	0.000115566	0.00131728	FALSE
Glu-UL	ENSG00000062598	ELMO2	20	rs2771285	46359415	C	G	0.682836	0.0850463	0.014633	1.36624e-07	0.000213027	0.00220169	FALSE
Glu-UL	ENSG00000158296	SLC13A3	20	rs2694902	46652956	C	T	0.149254	0.151447	0.0271483	3.56221e-07	0.000421678	0.00393411	FALSE
Glu-UL	ENSG00000124207	CSE1L	20	rs35649484	49138625	C	T	0.235075	0.0685154	0.0150341	1.94402e-05	0.00827707	0.0445141	FALSE
Glu-UL	ENSG00000124212	PTGIS	20	rs116939356	49568023	G	T	0.0671642	0.250767	0.0501605	3.5944e-06	0.00249571	0.0172016	TRUE
Glu-UL	ENSG00000158470	B4GALT5	20	rs6067189	49704748	A	C	0.548507	-0.110104	0.015114	2.541e-10	6.18038e-07	1.25686e-05	FALSE
Glu-UL	ENSG00000244687	UBE2V1	20	rs6095840	50245310	G	A	0.0559702	0.21149	0.0398211	1.04908e-06	0.00100244	0.0080698	FALSE
Glu-UL	ENSG00000295844		20	rs4811281	52044790	A	G	0.242537	-0.174168	0.0328236	1.06962e-06	0.00112254	0.00881175	FALSE
Glu-UL	ENSG00000259723		20	rs6097480	53560021	G	A	0.716418	-0.830245	0.066876	5.76456e-20	1.91707e-15	2.24476e-13	FALSE
Glu-UL	ENSG00000171940	ZNF217	20	rs6097480	53560021	G	A	0.716418	-0.215192	0.0398165	7.20637e-07	0.000993831	0.00800678	FALSE
Glu-UL	ENSG00000215440	NPEPL1	20	rs3746396	58693811	C	A	0.343284	0.143776	0.0281344	2.32655e-06	0.00254859	0.0174726	FALSE
Glu-UL	ENSG00000215440	NPEPL1	20	rs3746396	58693811	C	A	0.343284	0.143776	0.0281344	2.32655e-06	0.00254859	0.0174726	FALSE
Glu-UL	ENSG00000228340	MIR646HG	20	rs2025050	60140164	C	T	0.511194	-0.540384	0.103961	1.64569e-06	0.00176411	0.0129876	FALSE
Glu-UL	ENSG00000228340	MIR646HG	20	rs2025050	60140164	C	T	0.511194	-0.540384	0.103961	1.64569e-06	0.00176411	0.0129876	FALSE
Glu-UL	ENSG00000228340	MIR646HG	20	rs2025050	60140164	C	T	0.511194	-0.540384	0.103961	1.64569e-06	0.00176411	0.0129876	FALSE
Glu-UL	ENSG00000149679	CABLES2	20	rs2427323	62406099	A	G	0.541045	0.274706	0.0323703	1.28753e-12	7.1532e-09	2.22684e-07	FALSE
Glu-UL	ENSG00000101187	SLCO4A1	20	rs3187081	62656375	G	A	0.597015	0.402058	0.0409545	3.68763e-15	7.82044e-11	3.54994e-09	FALSE
Glu-UL	ENSG00000092758	COL9A3	20	rs66658258	62831150	G	C	0.104478	0.845154	0.118975	5.59792e-10	1.35496e-06	2.54314e-05	FALSE
Glu-UL	ENSG00000149658	YTHDF1	20	rs741758	62832149	T	C	0.354478	0.128207	0.02577	3.95052e-06	0.0053172	0.0312192	TRUE
Glu-UL	ENSG00000101198	NKAIN4	20	rs2281566	63261160	C	A	0.626866	-0.220312	0.0389582	2.60527e-07	0.000478354	0.00439312	TRUE
Glu-UL	ENSG00000125534	PPDPF	20	rs2150808	63508936	A	G	0.108209	-0.236964	0.0447059	1.0941e-06	0.00148379	0.0111812	FALSE
Glu-UL	ENSG00000196700	ZNF512B	20	rs817325	63963816	A	G	0.55597	-0.406259	0.0266714	8.41428e-25	2.41274e-19	7.53379e-17	FALSE
Glu-UL	ENSG00000224905		21	rs77327242	14076401	T	C	0.0522388	-0.349984	0.0633347	4.41144e-07	0.000365077	0.00351574	FALSE
Glu-UL	ENSG00000222042		21	rs8130148	25641680	C	T	0.690298	-0.199822	0.0428335	1.29692e-05	0.00739718	0.0406736	FALSE
Glu-UL	ENSG00000185433	LINC00158	21	rs974680	25638800	A	G	0.783582	-0.274862	0.0586603	1.19992e-05	0.00598127	0.0345086	TRUE
Glu-UL	ENSG00000232855		21	rs9981922	28840396	T	C	0.272388	0.253826	0.0381182	3.82825e-09	6.13654e-06	9.53731e-05	FALSE
Glu-UL	ENSG00000156253	RWDD2B	21	rs60245322	28588757	T	G	0.100746	-0.331394	0.0689106	7.50013e-06	0.00395104	0.0249311	FALSE
Glu-UL	ENSG00000156273	BACH1	21	rs9981313	29458073	T	G	0.36194	0.111802	0.0180456	2.75275e-08	3.77939e-05	0.000494852	FALSE
Glu-UL	ENSG00000156273	BACH1	21	rs9981313	29458073	T	G	0.36194	0.111802	0.0180456	2.75275e-08	3.77939e-05	0.000494852	FALSE
Glu-UL	ENSG00000243646	IL10RB	21	rs2834167	33268483	A	G	0.264925	0.142075	0.0266759	9.88093e-07	0.000978387	0.00792574	FALSE
Glu-UL	ENSG00000142188	TMEM50B	21	rs2248355	33461022	G	A	0.723881	-0.156334	0.0278707	3.14228e-07	0.000380433	0.00363306	FALSE
Glu-UL	ENSG00000237945	LINC00649	21	rs2051189	33949712	A	C	0.522388	0.244057	0.0434376	3.02496e-07	0.000308545	0.00304241	FALSE
Glu-UL	ENSG00000159200	RCAN1	21	rs74658406	34505414	C	T	0.0559702	0.218414	0.039327	3.93908e-07	0.000389666	0.00370594	FALSE
Glu-UL	ENSG00000159216	RUNX1	21	rs2835246	36044746	G	A	0.186567	0.206799	0.0385407	8.42471e-07	0.00202837	0.0145549	FALSE
Glu-UL	ENSG00000159216	RUNX1	21	rs2835246	36044746	G	A	0.186567	0.206799	0.0385407	8.42471e-07	0.00202837	0.0145549	FALSE
Glu-UL	ENSG00000142197	DOP1B	21	rs2835321	36220443	T	C	0.552239	-0.0939566	0.0144116	6.95659e-09	1.76212e-05	0.000249071	FALSE
Glu-UL	ENSG00000159256	MORC3	21	rs2845757	36378492	G	A	0.324627	0.0982655	0.0140523	9.05798e-10	2.26686e-06	3.939e-05	FALSE
Glu-UL	ENSG00000159267	HLCS	21	rs1892915	36989963	T	C	0.809702	0.197534	0.0254699	3.22909e-11	8.51072e-08	2.10244e-06	TRUE
Glu-UL	ENSG00000185808	PIGP	21	rs2298682	37072590	A	G	0.41791	-0.240912	0.0427499	2.82385e-07	0.000289317	0.00287129	TRUE
Glu-UL	ENSG00000182670	TTC3	21	rs1543750	37074618	A	G	0.470149	0.106487	0.0124253	8.89426e-13	6.81915e-09	2.14226e-07	FALSE
Glu-UL	ENSG00000182093	GET1	21	rs13230	39397364	A	G	0.664179	-0.336392	0.0215792	2.20784e-25	1.86532e-20	6.86453e-18	FALSE
Glu-UL	ENSG00000185437	SH3BGR	21	rs2837045	39479858	C	T	0.589552	-0.206478	0.0320083	9.32774e-09	2.41703e-05	0.000329876	FALSE
Glu-UL	ENSG00000160191	PDE9A	21	rs55867548	42636859	T	C	0.0970149	-0.110509	0.0231898	8.86131e-06	0.00839627	0.0449908	TRUE
Glu-UL	ENSG00000225218		21	rs2839584	42816512	C	T	0.802239	0.527885	0.0609589	5.99044e-13	7.10676e-09	2.21908e-07	FALSE
Glu-UL	ENSG00000160193	WDR4	21	rs7282181	42937776	A	G	0.451493	-0.123044	0.0237882	1.82032e-06	0.00237806	0.0165422	TRUE
Glu-UL	ENSG00000160200	CBS	21	rs234731	43029279	G	A	0.369403	-0.387073	0.0758321	2.38191e-06	0.0018616	0.0135469	FALSE
Glu-UL	ENSG00000160200	CBS	21	rs234731	43029279	G	A	0.369403	-0.387073	0.0758321	2.38191e-06	0.0018616	0.0135469	FALSE
Glu-UL	ENSG00000160208	RRP1B	21	rs10211901	43702692	G	A	0.570895	0.0864402	0.017336	3.78299e-06	0.00249869	0.0172106	TRUE
Glu-UL	ENSG00000160221	GATD3	21	rs9306172	44055608	G	C	0.212687	1.05993	0.0726521	9.78025e-24	2.87969e-18	6.90069e-16	FALSE
Glu-UL	ENSG00000197381	ADARB1	21	rs431775	45109292	A	G	0.880597	-0.232167	0.0337915	1.53788e-09	6.49853e-06	0.000100544	FALSE
Glu-UL	ENSG00000223768	LINC00205	21	rs4819053	45291442	T	C	0.391791	-0.127772	0.0245011	1.53843e-06	0.00179888	0.0131742	FALSE
Glu-UL	ENSG00000173638	SLC19A1	21	rs1888530	45516509	C	T	0.470149	-0.151464	0.0316353	8.1349e-06	0.00656047	0.0370821	FALSE
Glu-UL	ENSG00000142173	COL6A2	21	rs60404808	46102185	C	A	0.19403	-0.433034	0.0770787	3.03107e-07	0.000412522	0.00387133	FALSE
Glu-UL	ENSG00000160282	FTCD	21	rs62215180	46175491	G	A	0.179104	-0.647982	0.0864972	1.02996e-10	6.18414e-07	1.25686e-05	FALSE
Glu-UL	ENSG00000160284	SPATC1L	21	rs62215189	46184081	A	G	0.294776	-0.422699	0.0737423	1.89896e-07	0.000293277	0.00290577	TRUE
Glu-UL	ENSG00000160285	LSS	21	rs13047780	46313656	T	C	0.791045	0.18528	0.0364723	2.62083e-06	0.00311421	0.0205974	FALSE
Glu-UL	ENSG00000093072	ADA2	22	rs1807518	17204468	C	T	0.533582	0.390135	0.0489177	1.22724e-11	5.12619e-08	1.36138e-06	FALSE
Glu-UL	ENSG00000070371	CLTCL1	22	rs5746715	19296215	T	C	0.291045	0.129436	0.0259387	3.72582e-06	0.00228879	0.0160437	FALSE
Glu-UL	ENSG00000185838	GNB1L	22	rs3788304	19852673	C	G	0.223881	0.139913	0.027909	3.40497e-06	0.00334105	0.0217755	FALSE
Glu-UL	ENSG00000299199		22	rs625686	20155409	C	T	0.671642	-0.344627	0.0626045	4.806e-07	0.0005278	0.00474985	TRUE
Glu-UL	ENSG00000305663		22	rs9619753	20437534	G	A	0.261194	0.367144	0.0511783	4.12459e-10	9.52771e-07	1.85939e-05	TRUE
Glu-UL	ENSG00000100027	YPEL1	22	rs28721456	21715468	T	C	0.134328	-0.152939	0.0305588	3.51876e-06	0.000987122	0.00797768	FALSE
Glu-UL	ENSG00000290920		22	rs77893787	23413778	G	A	0.0522388	-0.313371	0.0600115	1.49675e-06	0.00155459	0.0116247	FALSE
Glu-UL	ENSG00000272733		22	rs6003823	23649233	C	T	0.410448	-0.329097	0.0562785	1.1786e-07	0.000135648	0.00151108	FALSE
Glu-UL	ENSG00000189269	DRICH1	22	rs6003823	23649233	C	T	0.410448	-0.320601	0.0536038	6.77145e-08	9.36678e-05	0.00111324	FALSE
Glu-UL	ENSG00000228315	GUSBP11	22	rs12170464	23695119	T	G	0.190299	0.153202	0.0177265	6.46115e-13	3.82346e-09	1.30125e-07	FALSE
Glu-UL	ENSG00000099956	SMARCB1	22	rs4413253	23815497	G	A	0.507463	-0.0645154	0.0133846	7.1876e-06	0.00619439	0.0354439	FALSE
Glu-UL	ENSG00000133460	SLC2A11	22	rs113638588	23851812	C	G	0.100746	-0.27649	0.0573901	7.25444e-06	0.00575543	0.0334869	FALSE
Glu-UL	ENSG00000273295		22	rs2330634	23908608	C	G	0.585821	0.973734	0.0583294	3.87341e-27	9.48882e-22	4.25109e-19	FALSE
Glu-UL	ENSG00000099974	DDTL	22	rs5751776	23924767	A	C	0.574627	-0.944581	0.0625586	1.39105e-24	7.32891e-20	2.51729e-17	FALSE
Glu-UL	ENSG00000290199		22	rs5760119	23924644	G	C	0.585821	1.47622	0.0677812	2.08238e-34	3.13122e-27	4.03311e-24	FALSE
Glu-UL	ENSG00000099991	CABIN1	22	rs2236623	24182691	A	G	0.208955	0.0873737	0.0174758	3.58876e-06	0.00252563	0.0173614	TRUE
Glu-UL	ENSG00000100014	SPECC1L	22	rs762283	24547614	G	A	0.160448	0.0578433	0.0123497	1.20845e-05	0.00643831	0.0366328	FALSE
Glu-UL	ENSG00000100024	UPB1	22	rs1008932	24459214	C	T	0.570895	-0.26348	0.0404233	7.0009e-09	9.59747e-06	0.000143951	FALSE
Glu-UL	ENSG00000167037	SGSM1	22	rs7293112	24819967	C	T	0.19403	0.18899	0.033715	3.1905e-07	0.000375212	0.00359653	TRUE
Glu-UL	ENSG00000236858		22	rs16986747	27070880	G	A	0.257463	0.249255	0.0483322	1.93443e-06	0.00295843	0.0197845	FALSE
Glu-UL	ENSG00000226471		22	rs132534	28903818	T	C	0.735075	0.275886	0.0503096	5.23451e-07	0.000317169	0.00311777	FALSE
Glu-UL	ENSG00000225465	RFPL1S	22	rs5763240	29440937	T	C	0.328358	0.132386	0.0232772	2.28233e-07	0.000162348	0.0017665	FALSE
Glu-UL	ENSG00000299803		22	rs16987839	29587149	G	A	0.227612	0.280567	0.0526233	9.66105e-07	0.000703551	0.00602624	FALSE
Glu-UL	ENSG00000185339	TCN2	22	rs1005887	30664042	G	C	0.335821	0.176075	0.0339189	1.69127e-06	0.00148443	0.0111812	FALSE
Glu-UL	ENSG00000100036	SLC35E4	22	rs5997704	30614662	T	C	0.600746	0.118993	0.0246473	6.97881e-06	0.00518025	0.0306245	FALSE
Glu-UL	ENSG00000198089	SFI1	22	rs2051583	31869773	G	A	0.0858209	0.15367	0.0314767	5.66515e-06	0.00239951	0.0166387	FALSE
Glu-UL	ENSG00000205853	RFPL3S	22	rs2072816	32394411	G	T	0.257463	-0.318533	0.0541378	1.01474e-07	0.000151407	0.0016668	FALSE
Glu-UL	ENSG00000100225	FBXO7	22	rs5749445	32476271	A	C	0.347015	0.169594	0.0242111	8.59904e-10	2.45059e-06	4.22972e-05	FALSE
Glu-UL	ENSG00000100336	APOL4	22	rs6000183	36202599	G	A	0.119403	-0.525193	0.0962997	5.91033e-07	0.000551187	0.00490887	FALSE
Glu-UL	ENSG00000166862	CACNG2	22	rs5756302	36708828	C	T	0.309702	0.188212	0.0258407	2.55626e-10	1.04791e-06	2.02209e-05	FALSE
Glu-UL	ENSG00000298470		22	rs739190	37362232	T	C	0.951493	-0.634947	0.112349	2.64332e-07	0.000397729	0.0037599	FALSE
Glu-UL	ENSG00000237862		22	rs4821653	37375945	A	G	0.470149	-0.17437	0.0362977	7.64987e-06	0.00686998	0.0385356	TRUE
Glu-UL	ENSG00000166897	ELFN2	22	rs739190	37362232	T	C	0.951493	-0.239218	0.0490627	5.8034e-06	0.00527008	0.0310487	FALSE
Glu-UL	ENSG00000100106	TRIOBP	22	rs739138	37726455	A	G	0.727612	-0.127956	0.0251515	2.54573e-06	0.00195625	0.014116	FALSE
Glu-UL	ENSG00000184949	FAM227A	22	rs9610971	38514805	C	T	0.279851	0.332467	0.026233	1.98854e-20	8.49921e-16	1.16771e-13	FALSE
Glu-UL	ENSG00000100211	CBY1	22	rs5995603	38644728	G	A	0.253731	-0.121442	0.022918	1.1008e-06	0.000742133	0.00629911	FALSE
Glu-UL	ENSG00000295778		22	rs17304621	39294786	C	T	0.100746	0.372961	0.0752227	4.2197e-06	0.00322948	0.0212093	FALSE
Glu-UL	ENSG00000183066	WBP2NL	22	rs133335	42020052	A	G	0.481343	0.33577	0.0416704	8.53441e-12	5.85255e-08	1.50389e-06	FALSE
Glu-UL	ENSG00000198951	NAGA	22	rs762995	42276118	A	G	0.477612	0.245687	0.0473034	1.67263e-06	0.00099178	0.00799651	FALSE
Glu-UL	ENSG00000281538		22	rs5758698	42288812	C	T	0.190299	0.462422	0.0576762	1.01892e-11	4.60652e-08	1.2329e-06	FALSE
Glu-UL	ENSG00000188677	PARVB	22	rs35928604	44024135	G	C	0.343284	-0.14957	0.030366	4.78733e-06	0.00548414	0.0320533	TRUE
Glu-UL	ENSG00000280011		22	rs6006712	44255691	T	G	0.11194	0.619753	0.105192	9.82077e-08	0.000217412	0.00224027	FALSE
Glu-UL	ENSG00000100376	FAM118A	22	rs2142552	45323616	C	G	0.884328	-0.595037	0.0454752	3.7289e-21	3.70202e-16	5.22554e-14	FALSE
Glu-UL	ENSG00000130638	ATXN10	22	rs17573656	45750628	T	G	0.100746	-0.104265	0.0153205	2.03592e-09	6.32701e-06	9.81853e-05	FALSE
Glu-UL	ENSG00000310243		22	rs9615989	46407877	A	T	0.104478	-0.371859	0.0708749	1.35605e-06	0.0022609	0.0159132	FALSE
Glu-UL	ENSG00000205632	LINC01310	22	rs5771997	48709350	A	G	0.38806	-0.180358	0.0365415	4.60287e-06	0.00934183	0.0488632	FALSE
Glu-UL	ENSG00000100426	ZBED4	22	rs11703411	49865103	G	A	0.712687	0.0985425	0.0170215	1.50029e-07	0.000329339	0.00321667	FALSE
Glu-UL	ENSG00000100427	MLC1	22	rs6010168	50092775	A	G	0.473881	0.246261	0.0399342	3.10847e-08	6.73894e-05	0.000831612	FALSE
Glu-UL	ENSG00000296451		22	rs140522	50532837	T	C	0.615672	-0.251172	0.0432261	1.37353e-07	0.000204099	0.00212647	FALSE
Glu-UL	ENSG00000079974	RABL2B	22	rs373678555	50769827	C	T	0.0932836	0.15034	0.0322642	1.32383e-05	0.00779092	0.0425435	FALSE
Glu-UL	ENSG00000079974	RABL2B	22	rs373678555	50769827	C	T	0.0932836	0.15034	0.0322642	1.32383e-05	0.00779092	0.0425435	FALSE
Glu-UL	ENSG00000144455	SUMF1	3	rs11915920	4368850	C	T	0.496269	0.247169	0.0239272	3.95356e-16	5.64584e-12	3.17966e-10	FALSE
Glu-UL	ENSG00000144455	SUMF1	3	rs11915920	4368850	C	T	0.496269	0.247169	0.0239272	3.95356e-16	5.64584e-12	3.17966e-10	FALSE
Glu-UL	ENSG00000189229		3	rs9849820	6480356	G	A	0.246269	1.14884	0.145773	1.85981e-11	6.43991e-08	1.63848e-06	FALSE
Glu-UL	ENSG00000270207		3	rs9813540	7867681	C	T	0.350746	0.437834	0.0449072	4.95292e-15	6.08337e-11	2.81097e-09	FALSE
Glu-UL	ENSG00000231401		3	rs2047518	8495351	T	A	0.5	0.183975	0.0366367	3.29468e-06	0.00376504	0.024052	FALSE
Glu-UL	ENSG00000171148	TADA3	3	rs34082649	9853586	C	A	0.570895	-0.145171	0.0284677	2.42783e-06	0.00252262	0.0173523	FALSE
Glu-UL	ENSG00000214021	TTLL3	3	rs293783	9782321	C	G	0.847015	0.1386	0.0250079	4.12824e-07	0.000408294	0.00384881	FALSE
Glu-UL	ENSG00000163702	IL17RC	3	rs279569	9912210	A	G	0.5	-0.251419	0.0450497	3.52712e-07	0.00038318	0.00365526	FALSE
Glu-UL	ENSG00000163703	CRELD1	3	rs34706481	9962439	G	A	0.201493	0.143739	0.0257748	3.58819e-07	0.00053658	0.00480787	FALSE
Glu-UL	ENSG00000240288	GHRLOS	3	rs242730	10276858	A	G	0.36194	0.329527	0.0390145	1.53688e-12	3.08809e-08	8.48545e-07	FALSE
Glu-UL	ENSG00000197548	ATG7	3	rs8154	11554828	T	C	0.287313	-0.0905671	0.0164712	4.9307e-07	0.000685473	0.00589244	FALSE
Glu-UL	ENSG00000157152	SYN2	3	rs11707641	12114388	T	C	0.190299	-0.209908	0.0378697	4.11762e-07	0.000537416	0.00481118	FALSE
Glu-UL	ENSG00000154743	TSEN2	3	rs3806662	12484507	G	A	0.0559702	0.230677	0.0315091	2.17088e-10	8.03224e-07	1.59472e-05	TRUE
Glu-UL	ENSG00000144712	CAND2	3	rs9813960	12776706	A	G	0.55597	0.127726	0.0241884	1.18524e-06	0.00123482	0.00952384	FALSE
Glu-UL	ENSG00000154764	WNT7A	3	rs79020924	13819460	A	G	0.227612	0.211434	0.0417652	2.80805e-06	0.00336397	0.0218971	FALSE
Glu-UL	ENSG00000131379	C3orf20	3	rs1901	14670966	G	A	0.391791	-0.348789	0.0482843	3.31956e-10	8.59363e-07	1.69638e-05	FALSE
Glu-UL	ENSG00000131370	SH3BP5	3	rs2688668	15272091	G	A	0.589552	0.0941615	0.0188342	3.59179e-06	0.00274237	0.0186153	TRUE
Glu-UL	ENSG00000293553		3	rs6778562	15441268	C	G	0.522388	0.220731	0.0462958	8.77956e-06	0.00496777	0.0296576	FALSE
Glu-UL	ENSG00000169814	BTD	3	rs905555	15651452	G	A	0.514925	-0.095168	0.0171079	3.79736e-07	0.000375834	0.00359915	FALSE
Glu-UL	ENSG00000131386	GALNT15	3	rs12496802	16142441	A	G	0.466418	0.217271	0.0349239	2.46934e-08	3.93434e-05	0.000511228	FALSE
Glu-UL	ENSG00000154822	PLCL2	3	rs78660996	16547522	G	A	0.11194	0.0991185	0.0202991	5.64548e-06	0.00419265	0.026199	FALSE
Glu-UL	ENSG00000163576	EFHB	3	rs11128927	19946945	G	C	0.36194	0.999486	0.0624227	4.61409e-26	2.40701e-20	8.55255e-18	TRUE
Glu-UL	ENSG00000206559	ZCWPW2	3	rs1606393	28287658	A	G	0.455224	-0.118283	0.0251615	1.13227e-05	0.00655663	0.0370821	FALSE
Glu-UL	ENSG00000144671	SLC22A14	3	rs1384006	38219546	G	A	0.410448	-0.189512	0.0391291	6.57757e-06	0.00450166	0.0275289	FALSE
Glu-UL	ENSG00000168026	TTC21A	3	rs112130855	38889742	G	A	0.25	-0.20157	0.0365012	4.47719e-07	0.00041208	0.00387071	FALSE
Glu-UL	ENSG00000287780		3	rs59685908	39417278	T	C	0.25	0.39945	0.051846	4.0411e-11	1.1034e-07	2.67522e-06	FALSE
Glu-UL	ENSG00000168028	RPSA	3	rs36082176	39402654	T	C	0.477612	-0.126996	0.0253926	3.56633e-06	0.00256623	0.0175818	FALSE
Glu-UL	ENSG00000168038	ULK4	3	rs9837273	41771612	T	C	0.212687	0.100725	0.0201499	3.60166e-06	0.00208109	0.0148608	FALSE
Glu-UL	ENSG00000244607	CCDC13	3	rs73077220	42800848	T	C	0.227612	0.225821	0.0443799	2.53628e-06	0.00167435	0.0123854	FALSE
Glu-UL	ENSG00000298847		3	rs10865927	43131550	G	A	0.481343	-0.200803	0.0445197	2.31513e-05	0.00893095	0.0473145	FALSE
Glu-UL	ENSG00000196345	ZKSCAN7	3	rs6441850	44538115	G	A	0.298507	-0.230462	0.0232154	2.28161e-15	3.63436e-11	1.74183e-09	FALSE
Glu-UL	ENSG00000144792	ZNF660	3	rs12492600	44420412	G	A	0.287313	0.125822	0.0199009	1.60985e-08	1.46048e-05	0.000210183	FALSE
Glu-UL	ENSG00000164048	ZNF589	3	rs9819094	48278068	C	T	0.320896	0.129349	0.0166571	3.09219e-11	3.90179e-08	1.06082e-06	FALSE
Glu-UL	ENSG00000178252	WDR6	3	rs3774800	49297335	G	A	0.66791	-0.107384	0.0255654	7.17805e-05	0.00672302	0.0378803	FALSE
Glu-UL	ENSG00000145022	TCTA	3	rs9586	49176204	C	T	0.791045	0.219941	0.0511945	5.08261e-05	0.00535718	0.031427	FALSE
Glu-UL	ENSG00000173402	DAG1	3	rs13091525	49928118	G	T	0.119403	0.14816	0.0350924	6.64205e-05	0.00654253	0.0370821	FALSE
Glu-UL	ENSG00000004534	RBM6	3	rs62262093	49922955	T	C	0.526119	-0.0707666	0.0107705	5.59482e-09	4.82404e-06	7.76688e-05	FALSE
Glu-UL	ENSG00000001617	SEMA3F	3	rs35694819	50515725	A	G	0.208955	-0.110471	0.0255121	4.49331e-05	0.00795763	0.0431565	TRUE
Glu-UL	ENSG00000010322	NISCH	3	rs34736619	52498275	G	C	0.373134	-0.0778588	0.0164452	9.97167e-06	0.00281768	0.0190637	TRUE
Glu-UL	ENSG00000055955	ITIH4	3	rs4687658	52826350	C	G	0.235075	0.270857	0.0464023	1.23102e-07	0.00010504	0.00122526	FALSE
Glu-UL	ENSG00000243696		3	rs758801	52502292	A	C	0.873134	0.336286	0.0638144	1.23707e-06	0.000619662	0.00539286	FALSE
Glu-UL	ENSG00000163935	SFMBT1	3	rs35750877	53065571	A	G	0.0708955	-0.153518	0.0309716	4.24233e-06	0.00213383	0.0151349	FALSE
Glu-UL	ENSG00000272305		3	rs2581787	53093661	G	T	0.58209	0.702835	0.0560027	3.30199e-20	1.65526e-15	1.98328e-13	FALSE
Glu-UL	ENSG00000163933	RFT1	3	rs2564923	53069246	A	G	0.61194	0.193004	0.0244448	1.74468e-11	5.64173e-08	1.46433e-06	FALSE
Glu-UL	ENSG00000056736	IL17RB	3	rs9832685	53409832	T	C	0.302239	0.224001	0.0459688	5.86805e-06	0.00546257	0.0319453	FALSE
Glu-UL	ENSG00000180376	CCDC66	3	rs60948160	56543219	G	A	0.436567	-0.142309	0.0139769	7.52606e-16	1.41436e-11	7.28696e-10	FALSE
Glu-UL	ENSG00000295019		3	rs62258103	58393097	C	A	0.33209	-0.341627	0.04826	6.23436e-10	1.45555e-06	2.69148e-05	FALSE
Glu-UL	ENSG00000163689	CFAP20DC	3	rs371239130	58816808	T	G	0.0708955	-0.222659	0.0488776	1.95787e-05	0.00880964	0.0467439	FALSE
Glu-UL	ENSG00000293415		3	rs114119256	63826866	C	T	0.0708955	0.741553	0.124404	7.36323e-08	0.000114717	0.00130905	FALSE
Glu-UL	ENSG00000163638	ADAMTS9	3	rs7640062	64632023	A	G	0.406716	0.390963	0.0686065	2.17912e-07	0.000352212	0.00340777	FALSE
Glu-UL	ENSG00000296009		3	rs11713127	66875149	A	T	0.548507	0.241845	0.0480777	3.18467e-06	0.00295878	0.0197845	FALSE
Glu-UL	ENSG00000113805	CNTN3	3	rs6549671	74903086	A	G	0.320896	0.202141	0.042508	9.20766e-06	0.0044358	0.0273044	FALSE
Glu-UL	ENSG00000272690	LINC02018	3	rs56670933	75372075	T	A	0.0634328	-0.522138	0.0911076	1.90762e-07	6.82603e-05	0.000840347	FALSE
Glu-UL	ENSG00000293315		3	rs2875284	75675658	A	G	0.574627	-0.316939	0.0504764	1.93505e-08	1.18199e-05	0.000173744	FALSE
Glu-UL	ENSG00000242516	LINC00960	3	rs2875284	75675658	A	G	0.574627	-0.838751	0.04774	1.75342e-28	7.72216e-24	4.97319e-21	FALSE
Glu-UL	ENSG00000281392	LINC00506	3	rs7648282	87106980	A	G	0.190299	-0.342529	0.0482089	5.56257e-10	5.92521e-07	1.21866e-05	FALSE
Glu-UL	ENSG00000080822	CLDND1	3	rs3762660	98506816	T	G	0.100746	0.293836	0.0528373	3.82298e-07	0.000476343	0.00437854	FALSE
Glu-UL	ENSG00000064225	ST3GAL6	3	rs2919235	98779393	C	T	0.541045	0.135987	0.0285474	8.92469e-06	0.00508869	0.0302061	FALSE
Glu-UL	ENSG00000154175	ABI3BP	3	rs75017790	101351576	A	C	0.100746	0.577501	0.117859	5.2862e-06	0.00392606	0.0248648	FALSE
Glu-UL	ENSG00000293268		3	rs34963630	101785973	C	T	0.373134	-0.111906	0.0223618	3.52428e-06	0.00187943	0.0136573	FALSE
Glu-UL	ENSG00000214407	RDUR	3	rs1626282	101933454	G	A	0.41791	-0.173326	0.034896	4.0773e-06	0.00239303	0.016605	FALSE
Glu-UL	ENSG00000144824	PHLDB2	3	rs4682298	111728212	A	G	0.481343	-0.163118	0.0342234	8.83326e-06	0.0066482	0.0375368	FALSE
Glu-UL	ENSG00000144834	TAGLN3	3	rs4386465	112036219	A	G	0.649254	0.121659	0.0257915	1.06533e-05	0.00691496	0.0387074	FALSE
Glu-UL	ENSG00000176040	TMPRSS7	3	rs3749310	112011699	G	A	0.496269	-0.985388	0.0695144	4.87499e-23	7.51363e-18	1.47946e-15	FALSE
Glu-UL	ENSG00000172139	SLC9C1	3	rs17446744	112232337	G	A	0.30597	0.317352	0.0503735	1.77016e-08	2.91162e-05	0.000391672	FALSE
Glu-UL	ENSG00000138459	SLC35A5	3	rs2668214	112571989	A	G	0.123134	0.177616	0.038881	1.8667e-05	0.0092766	0.0486207	FALSE
Glu-UL	ENSG00000144857	BOC	3	rs79231157	113212058	T	G	0.376866	0.313906	0.055153	2.24333e-07	0.00020675	0.00214542	TRUE
Glu-UL	ENSG00000206530	CFAP44	3	rs11715515	113358489	C	A	0.0932836	0.204434	0.0435917	1.18151e-05	0.00649974	0.0369415	FALSE
Glu-UL	ENSG00000178075	GRAMD1C	3	rs13087470	113834157	G	A	0.246269	-0.281053	0.0586074	7.89828e-06	0.00394968	0.0249311	FALSE
Glu-UL	ENSG00000242880		3	rs112093213	115193644	A	C	0.0671642	0.221201	0.0470286	1.1213e-05	0.00495643	0.0296414	FALSE
Glu-UL	ENSG00000144847	IGSF11	3	rs6784208	119212542	C	T	0.936567	-0.561855	0.0862995	7.22841e-09	1.25376e-05	0.000183509	TRUE
Glu-UL	ENSG00000175697	GPR156	3	rs11719262	120170453	G	A	0.425373	-0.222117	0.0377372	1.00572e-07	0.00011465	0.00130905	TRUE
Glu-UL	ENSG00000293512	BTNL12P	3	rs114872182	119944933	G	A	0.0559702	2.26565	0.210129	5.61355e-17	3.04848e-10	1.22227e-08	FALSE
Glu-UL	ENSG00000121542	SEC22A	3	rs13064484	123195322	T	G	0.347015	0.0931635	0.0194748	8.26117e-06	0.00574845	0.0334652	FALSE
Glu-UL	ENSG00000310167		3	rs62261546	123053136	C	T	0.0485075	0.540681	0.113236	8.54921e-06	0.00535869	0.031427	FALSE
Glu-UL	ENSG00000304694		3	rs6784521	125651348	C	T	0.0746269	-0.5263	0.0719375	2.21777e-10	7.63015e-07	1.52075e-05	FALSE
Glu-UL	ENSG00000241288	LINC02614	3	rs113450106	125959554	G	T	0.223881	-0.205812	0.0372278	4.36651e-07	0.000417522	0.00390404	FALSE
Glu-UL	ENSG00000300950		3	rs2244835	126014682	G	C	0.272388	-0.56262	0.0746902	8.59222e-11	2.81165e-07	6.16615e-06	FALSE
Glu-UL	ENSG00000291096		3	rs11920013	125961483	T	A	0.227612	-0.373736	0.0695361	8.12718e-07	0.000964793	0.00783409	FALSE
Glu-UL	ENSG00000287232		3	rs71327758	126188945	G	T	0.205224	0.27517	0.0585245	1.12876e-05	0.00946155	0.0493348	FALSE
Glu-UL	ENSG00000070476	ZXDC	3	rs12957	126451852	T	G	0.604478	0.119811	0.0229271	1.4739e-06	0.0014559	0.0110147	FALSE
Glu-UL	ENSG00000132394	EEFSEC	3	rs11707297	128214360	G	C	0.727612	0.0841981	0.0135155	2.38251e-08	3.23239e-05	0.000428666	FALSE
Glu-UL	ENSG00000163902	RPN1	3	rs4443194	128664603	T	A	0.708955	-1.03967	0.0465099	3.74788e-35	6.35674e-28	1.55719e-24	FALSE
Glu-UL	ENSG00000004399	PLXND1	3	rs78287187	129920324	G	A	0.0634328	0.485062	0.10468	1.45952e-05	0.006098	0.0349862	FALSE
Glu-UL	ENSG00000249846	LINC02021	3	rs56235703	130099546	A	G	0.485075	-0.392358	0.0525193	1.12742e-10	3.49348e-07	7.57845e-06	FALSE
Glu-UL	ENSG00000249846	LINC02021	3	rs56235703	130099546	A	G	0.485075	-0.392358	0.0525193	1.12742e-10	3.49348e-07	7.57845e-06	FALSE
Glu-UL	ENSG00000114670	NEK11	3	rs2760257	130865910	T	G	0.257463	0.0856892	0.0186585	1.70434e-05	0.00538907	0.0315872	FALSE
Glu-UL	ENSG00000113971	NPHP3	3	rs12486323	132711960	T	C	0.149254	-0.217335	0.0373535	1.33056e-07	0.000206294	0.00214316	FALSE
Glu-UL	ENSG00000291042		3	rs11713994	133693038	G	A	0.108209	-0.256072	0.0431226	8.09126e-08	0.000102609	0.00120149	FALSE
Glu-UL	ENSG00000154917	RAB6B	3	rs2715608	133832134	C	T	0.783582	-0.132629	0.0227472	1.265e-07	0.000172	0.00185196	FALSE
Glu-UL	ENSG00000299712		3	rs4974485	134343492	A	C	0.623134	-0.300353	0.0480865	2.2234e-08	2.31561e-05	0.000316453	FALSE
Glu-UL	ENSG00000293138		3	rs1353776	134358628	C	G	0.619403	-0.270626	0.0450052	5.9173e-08	6.70119e-05	0.000828824	TRUE
Glu-UL	ENSG00000168917	SLC35G2	3	rs835648	136952662	A	T	0.66791	-0.190492	0.0409843	1.38371e-05	0.0039626	0.0249429	FALSE
Glu-UL	ENSG00000158163	DZIP1L	3	rs56057913	138110199	G	A	0.0522388	-0.659364	0.105193	2.02577e-08	3.39518e-05	0.000448522	FALSE
Glu-UL	ENSG00000158186	MRAS	3	rs4678416	138373905	G	A	0.772388	-0.24818	0.0209222	5.73516e-19	2.48564e-14	2.20798e-12	FALSE
Glu-UL	ENSG00000155893	PXYLP1	3	rs2311733	141265484	T	G	0.578358	-0.117171	0.0244859	8.2155e-06	0.00416622	0.0260654	FALSE
Glu-UL	ENSG00000069849	ATP1B3	3	rs9868050	141991617	C	T	0.0858209	0.0880244	0.0183918	8.18976e-06	0.00473098	0.0285751	FALSE
Glu-UL	ENSG00000287045		3	rs6440102	142689160	T	G	0.69403	-0.242761	0.0368009	5.00135e-09	6.75034e-06	0.000103817	FALSE
Glu-UL	ENSG00000163710	PCOLCE2	3	rs114604528	142885023	A	T	0.33209	0.296009	0.0585288	2.86306e-06	0.00253684	0.0174152	FALSE
Glu-UL	ENSG00000181744	DIPK2A	3	rs9866992	143964185	G	A	0.0746269	0.367266	0.0672032	5.64714e-07	0.000420329	0.00392672	FALSE
Glu-UL	ENSG00000289986		3	rs9866992	143964185	G	A	0.0746269	0.431342	0.0834857	1.8628e-06	0.00090714	0.00744812	FALSE
Glu-UL	ENSG00000120742	SERP1	3	rs7638500	150584373	A	G	0.686567	0.18906	0.0267332	6.42115e-10	1.4575e-06	2.69148e-05	FALSE
Glu-UL	ENSG00000289885		3	rs66523149	153191814	T	C	0.317164	-0.349113	0.0581541	6.16941e-08	0.000106636	0.00123786	FALSE
Glu-UL	ENSG00000197980	LEKR1	3	rs9826073	156869470	T	A	0.850746	-0.331797	0.0553318	6.34582e-08	7.91646e-05	0.000955189	FALSE
Glu-UL	ENSG00000118855	MFSD1	3	rs7615751	158792041	A	C	0.537313	-0.0905949	0.0193864	1.25822e-05	0.00450461	0.0275306	FALSE
Glu-UL	ENSG00000293192		3	rs73155941	160588508	T	C	0.223881	0.26793	0.0481898	3.8429e-07	0.000215711	0.00222496	FALSE
Glu-UL	ENSG00000169251	NMD3	3	rs7630187	160972795	A	T	0.339552	-0.118639	0.0196352	5.24308e-08	3.7795e-05	0.000494852	FALSE
Glu-UL	ENSG00000169064	ZBBX	3	rs2140366	167383690	T	C	0.0970149	-0.33685	0.0579058	1.33681e-07	0.000111512	0.00128241	FALSE
Glu-UL	ENSG00000244706		3	rs2055362	167922233	C	T	0.671642	-0.4214	0.0647799	7.39746e-09	8.68728e-06	0.000131448	FALSE
Glu-UL	ENSG00000144959	NCEH1	3	rs2276805	172710992	T	C	0.679105	0.343042	0.0624646	5.06705e-07	0.000457823	0.00423096	TRUE
Glu-UL	ENSG00000177694	NAALADL2	3	rs10936798	174494668	C	T	0.384328	0.0886787	0.0164558	7.67635e-07	0.000603478	0.00527876	TRUE
Glu-UL	ENSG00000058063	ATP11B	3	rs7629226	182773627	A	G	0.123134	-0.104249	0.0199106	1.41572e-06	0.00104303	0.00831856	FALSE
Glu-UL	ENSG00000114859	CLCN2	3	rs41266265	184353229	G	A	0.257463	0.223978	0.0284556	1.94201e-11	7.63579e-08	1.91438e-06	FALSE
Glu-UL	ENSG00000073849	ST6GAL1	3	rs28366036	186929974	A	C	0.313433	-0.118975	0.0183144	7.68264e-09	3.03203e-05	0.000406278	TRUE
Glu-UL	ENSG00000127249	ATP13A4	3	rs6790120	193600787	C	T	0.451493	-0.200471	0.0312761	1.11101e-08	1.77905e-05	0.00025112	FALSE
Glu-UL	ENSG00000145014	TMEM44	3	rs12487553	194193806	A	G	0.373134	-0.0973937	0.0175714	4.12051e-07	0.000658289	0.00570014	FALSE
Glu-UL	ENSG00000041802	LSG1	3	rs3821402	194648850	C	A	0.164179	0.391413	0.031448	5.05889e-20	5.02475e-15	5.45013e-13	FALSE
Glu-UL	ENSG00000289929		3	rs112730707	195855482	A	G	0.160448	-0.885315	0.0945401	2.68374e-14	4.79303e-10	1.87078e-08	FALSE
Glu-UL	ENSG00000176945	MUC20	3	rs6785037	195934218	C	A	0.559702	0.321315	0.0655044	5.17888e-06	0.00437589	0.0270168	FALSE
Glu-UL	ENSG00000290762		3	rs6785037	195934218	C	A	0.559702	0.151464	0.0297921	2.58e-06	0.00321682	0.0211666	FALSE
Glu-UL	ENSG00000272741		3	rs55996879	196319429	C	T	0.227612	0.232095	0.04423	1.35189e-06	0.00194666	0.0140665	FALSE
Glu-UL	ENSG00000213123	DYNLT2B	3	rs4916425	196297848	T	C	0.272388	0.125536	0.0211653	8.33006e-08	0.00015613	0.00171149	FALSE
Glu-UL	ENSG00000075711	DLG1	3	rs440360	197242793	T	C	0.156716	-0.121214	0.0257116	1.0761e-05	0.00798459	0.0432572	FALSE
Glu-UL	ENSG00000286909		3	rs2932688	197646644	G	C	0.261194	-0.333647	0.058572	2.19956e-07	0.000200287	0.00209311	FALSE
Glu-UL	ENSG00000250312	ZNF718	4	rs6599307	149993	C	T	0.231343	0.351742	0.0288408	1.42512e-19	3.22776e-15	3.61517e-13	FALSE
Glu-UL	ENSG00000186777	ZNF732	4	rs61792237	109223	T	C	0.197761	-0.297366	0.0650721	1.85559e-05	0.00578353	0.0336314	FALSE
Glu-UL	ENSG00000174227	PIGG	4	rs7669178	627727	G	C	0.86194	-0.089264	0.0184904	6.98517e-06	0.00360483	0.0231866	FALSE
Glu-UL	ENSG00000272927		4	rs73058406	662092	C	G	0.134328	-0.470812	0.068314	1.40256e-09	3.26757e-06	5.49262e-05	FALSE
Glu-UL	ENSG00000185619	PCGF3	4	rs73219293	708380	G	A	0.268657	0.0753375	0.0137408	5.25596e-07	0.000431246	0.00401415	FALSE
Glu-UL	ENSG00000168993	CPLX1	4	rs56371097	846828	C	G	0.257463	0.14699	0.0285204	1.9595e-06	0.00148712	0.0111933	FALSE
Glu-UL	ENSG00000178222	RNF212	4	rs12233733	1064488	C	T	0.19403	-0.422508	0.0777812	6.45239e-07	0.000778154	0.00655509	FALSE
Glu-UL	ENSG00000163945	UVSSA	4	rs74692412	1418997	A	G	0.0708955	0.395761	0.0582947	2.18758e-09	4.61201e-06	7.47222e-05	FALSE
Glu-UL	ENSG00000125388	GRK4	4	rs3021146	2956459	A	G	0.33209	-0.174231	0.0135751	1.03007e-20	2.0361e-15	2.35736e-13	FALSE
Glu-UL	ENSG00000290888		4	rs34630028	4160224	T	G	0.0932836	0.729419	0.0675123	5.10663e-17	2.51385e-12	1.5511e-10	FALSE
Glu-UL	ENSG00000310372		4	rs12645336	6632104	T	C	0.0858209	-0.727648	0.0508955	3.0335e-23	3.56608e-18	7.9882e-16	FALSE
Glu-UL	ENSG00000288075		4	rs4565077	9392591	G	A	0.223881	0.669506	0.0478219	9.69255e-23	5.06038e-18	1.04287e-15	FALSE
Glu-UL	ENSG00000287117		4	rs6842656	9690426	G	C	0.246269	0.46712	0.0233982	5.87334e-32	1.00905e-24	7.99809e-22	FALSE
Glu-UL	ENSG00000109667	SLC2A9	4	rs17187075	9988704	G	C	0.522388	-0.327138	0.0324128	1.10783e-15	2.96077e-11	1.45974e-09	FALSE
Glu-UL	ENSG00000307260		4	rs71605977	11889506	G	A	0.246269	0.296672	0.0620627	8.37507e-06	0.00472331	0.0285455	FALSE
Glu-UL	ENSG00000250634	LINC01182	4	rs1491260	13652637	A	C	0.156716	0.432415	0.0540958	1.13294e-11	5.80355e-08	1.49599e-06	FALSE
Glu-UL	ENSG00000250634	LINC01182	4	rs1491260	13652637	A	C	0.156716	0.432415	0.0540958	1.13294e-11	5.80355e-08	1.49599e-06	FALSE
Glu-UL	ENSG00000304274		4	rs13110674	15591453	A	C	0.328358	0.51779	0.0603157	8.3422e-13	5.50055e-09	1.76022e-07	FALSE
Glu-UL	ENSG00000047662	FAM184B	4	rs6819132	17688129	G	T	0.369403	0.189487	0.0350447	7.13651e-07	0.000548325	0.00489183	TRUE
Glu-UL	ENSG00000163257	DCAF16	4	rs12645994	17852949	C	A	0.58209	0.146075	0.0298607	5.45362e-06	0.00348702	0.0226124	FALSE
Glu-UL	ENSG00000286046		4	rs6449376	18393905	A	G	0.235075	0.396885	0.0759927	1.4919e-06	0.00106838	0.00847486	FALSE
Glu-UL	ENSG00000038210	PI4K2B	4	rs73094683	25160758	G	T	0.119403	-0.457212	0.0385957	6.12906e-19	2.91003e-14	2.51981e-12	TRUE
Glu-UL	ENSG00000304023		4	rs4459977	25183937	G	A	0.652985	0.292971	0.0451619	7.98799e-09	1.16505e-05	0.000172238	FALSE
Glu-UL	ENSG00000053900	ANAPC4	4	rs1533133	25382683	T	C	0.470149	-0.0872972	0.0181607	7.56069e-06	0.0082821	0.0445178	FALSE
Glu-UL	ENSG00000288321		4	rs1448275	33048065	T	C	0.75	0.217221	0.0460343	1.05869e-05	0.00206239	0.0147681	FALSE
Glu-UL	ENSG00000169299	PGM2	4	rs3096465	37807197	A	T	0.253731	0.240861	0.0337138	4.69117e-10	4.01424e-06	6.6288e-05	FALSE
Glu-UL	ENSG00000174125	TLR1	4	rs73236617	38792239	C	G	0.164179	0.328756	0.0567122	1.45376e-07	0.000224436	0.00230802	FALSE
Glu-UL	ENSG00000249685		4	rs11729098	39232357	G	A	0.343284	-0.235443	0.042655	4.52458e-07	0.000541953	0.00484338	FALSE
Glu-UL	ENSG00000075539	FRYL	4	rs13141523	48787252	A	G	0.608209	0.0523217	0.0113501	1.59712e-05	0.00309112	0.0205098	TRUE
Glu-UL	ENSG00000287999		4	rs17051554	52562682	C	T	0.13806	-0.339988	0.0662907	2.1637e-06	0.000990563	0.00799295	FALSE
Glu-UL	ENSG00000300337		4	rs1384696	53024188	A	T	0.130597	-0.429079	0.091397	1.15964e-05	0.00457662	0.0278715	FALSE
Glu-UL	ENSG00000072201	LNX1	4	rs115101712	53583793	T	C	0.0671642	-0.388535	0.0743272	1.4644e-06	0.00138457	0.0105213	FALSE
Glu-UL	ENSG00000134852	CLOCK	4	rs6849883	55387515	G	T	0.384328	0.0784863	0.0139273	2.82339e-07	0.000296823	0.00293526	FALSE
Glu-UL	ENSG00000250075		4	rs7669803	67473081	C	T	0.869403	-0.262345	0.0447398	1.1023e-07	0.000107021	0.00124046	FALSE
Glu-UL	ENSG00000153802	TMPRSS11D	4	rs35769895	67714206	G	C	0.152985	0.395912	0.0638102	2.65012e-08	2.09857e-05	0.000289868	FALSE
Glu-UL	ENSG00000290400		4	rs2319658	67741216	T	C	0.182836	0.334154	0.0634614	1.25835e-06	0.000819402	0.00682564	FALSE
Glu-UL	ENSG00000138744	NAAA	4	rs6826085	75949076	C	T	0.376866	0.281019	0.0323407	5.25568e-13	3.91672e-09	1.31462e-07	FALSE
Glu-UL	ENSG00000163749	CCDC158	4	rs10023335	76437834	T	C	0.313433	-0.230049	0.0338534	2.12732e-09	3.8999e-06	6.48153e-05	FALSE
Glu-UL	ENSG00000138764	CCNG2	4	rs17002418	77185401	A	G	0.0746269	-0.429003	0.0479258	1.65396e-13	1.70649e-09	6.08445e-08	FALSE
Glu-UL	ENSG00000156234	CXCL13	4	rs79293130	77183038	T	C	0.0895522	-0.580549	0.0828129	8.39446e-10	1.64835e-06	2.98506e-05	FALSE
Glu-UL	ENSG00000145287	PLAC8	4	rs13138461	83271775	T	C	0.708955	0.221387	0.0336137	5.22939e-09	9.5175e-06	0.000143098	FALSE
Glu-UL	ENSG00000170509	HSD17B13	4	rs10433879	87309988	G	C	0.25	0.320296	0.0604849	1.11637e-06	0.000893685	0.00736111	FALSE
Glu-UL	ENSG00000255723		4	rs4574370	87381968	T	C	0.593284	-0.202058	0.0380009	1.02355e-06	0.000791044	0.00662691	FALSE
Glu-UL	ENSG00000198189	HSD17B11	4	rs7662528	87377108	T	C	0.589552	-0.145087	0.0290921	3.76883e-06	0.00266015	0.0181529	FALSE
Glu-UL	ENSG00000168785	TSPAN5	4	rs4699355	98599430	A	T	0.119403	-0.108107	0.023679	1.88553e-05	0.00893894	0.0473325	FALSE
Glu-UL	ENSG00000109323	MANBA	4	rs393223	102684759	G	A	0.634328	0.120177	0.0190946	1.81748e-08	1.59494e-05	0.000227312	FALSE
Glu-UL	ENSG00000248242		4	rs10026964	105076033	T	A	0.619403	0.431955	0.0686505	1.83039e-08	2.76365e-05	0.00037274	TRUE
Glu-UL	ENSG00000155011	DKK2	4	rs2726667	107612067	G	A	0.365672	0.217138	0.0332532	6.65577e-09	5.75431e-06	9.03079e-05	FALSE
Glu-UL	ENSG00000138801	PAPSS1	4	rs2074372	107720013	C	G	0.865672	0.133678	0.0244205	5.44499e-07	0.000327387	0.00320673	TRUE
Glu-UL	ENSG00000180245	RRH	4	rs6842245	109842774	C	T	0.791045	0.290791	0.0616003	1.05096e-05	0.00652173	0.0370256	FALSE
Glu-UL	ENSG00000288921		4	rs687299	118271336	G	C	0.552239	0.225601	0.0492187	1.76182e-05	0.0083957	0.0449908	FALSE
Glu-UL	ENSG00000299982		4	rs687299	118271336	G	C	0.552239	0.242196	0.0491468	4.74206e-06	0.0023461	0.0163675	FALSE
Glu-UL	ENSG00000297398		4	rs13119033	118382276	G	A	0.399254	0.272829	0.0463844	1.02246e-07	7.58359e-05	0.000919331	FALSE
Glu-UL	ENSG00000164099	PRSS12	4	rs11947394	118310516	T	C	0.276119	-0.239772	0.0455201	1.24871e-06	0.000593135	0.00519711	FALSE
Glu-UL	ENSG00000294020		4	rs11098500	119298084	T	A	0.309702	0.222406	0.0423537	1.33213e-06	0.000945638	0.00770893	FALSE
Glu-UL	ENSG00000291202		4	rs1480931	119474654	C	A	0.294776	0.662503	0.0475587	1.27548e-22	3.1808e-17	5.55521e-15	FALSE
Glu-UL	ENSG00000164111	ANXA5	4	rs12511308	121592394	A	T	0.466418	-0.196438	0.0418137	1.14545e-05	0.00962398	0.0499586	FALSE
Glu-UL	ENSG00000248863		4	rs35149971	139470914	G	C	0.298507	-0.329914	0.0322857	6.41329e-16	8.05183e-12	4.32125e-10	FALSE
Glu-UL	ENSG00000286896		4	rs697579	139623229	C	A	0.578358	-0.318927	0.0584164	5.77292e-07	0.00052982	0.00476387	TRUE
Glu-UL	ENSG00000145391	SETD7	4	rs697579	139623229	C	A	0.578358	-0.146434	0.0264833	4.35213e-07	0.000392029	0.00372309	TRUE
Glu-UL	ENSG00000109452	INPP4B	4	rs72719149	143122183	T	C	0.30597	0.300805	0.0332229	1.05158e-13	1.33417e-09	4.82374e-08	FALSE
Glu-UL	ENSG00000197465	GYPE	4	rs11735239	143689372	A	T	0.276119	-0.237107	0.045997	1.95191e-06	0.000695493	0.00596713	FALSE
Glu-UL	ENSG00000285713		4	rs12504213	144801156	G	T	0.0895522	-0.122746	0.0269216	1.92918e-05	0.00621425	0.0355152	FALSE
Glu-UL	ENSG00000120251	GRIA2	4	rs6840345	157665661	G	C	0.664179	0.0937539	0.0183701	2.38889e-06	0.00130525	0.0100221	TRUE
Glu-UL	ENSG00000164129	NPY5R	4	rs11735477	163471965	T	A	0.186567	0.284318	0.0564683	3.12667e-06	0.00179289	0.0131581	FALSE
Glu-UL	ENSG00000129116	PALLD	4	rs6819953	168493278	G	T	0.11194	0.193188	0.0409026	1.04101e-05	0.00679668	0.0382285	FALSE
Glu-UL	ENSG00000248174	LINC02268	4	rs75315518	174106759	C	T	0.134328	1.04851	0.0756105	1.63469e-22	1.72027e-17	3.22293e-15	FALSE
Glu-UL	ENSG00000164118	CEP44	4	rs34888351	174290036	T	A	0.496269	-0.0954173	0.0193941	4.89319e-06	0.0042419	0.0264425	FALSE
Glu-UL	ENSG00000164120	HPGD	4	rs1346271	174522855	C	G	0.380597	0.305248	0.0518741	1.01195e-07	0.000150132	0.00165454	TRUE
Glu-UL	ENSG00000109771	LRP2BP	4	rs6815168	185404275	T	C	0.100746	-0.374559	0.0698011	8.41317e-07	0.00111415	0.00876371	TRUE
Glu-UL	ENSG00000109794	FAM149A	4	rs13123385	186105758	T	C	0.141791	-0.158659	0.0325677	5.89551e-06	0.00813676	0.0439429	TRUE
Glu-UL	ENSG00000145476	CYP4V2	4	rs7663027	186191475	G	C	0.354478	-0.543414	0.0519589	2.26629e-16	1.13315e-11	5.95729e-10	TRUE
Glu-UL	ENSG00000164344	KLKB1	4	rs4253269	186242357	C	T	0.287313	0.322798	0.0591467	5.8193e-07	0.000967147	0.00784702	FALSE
Glu-UL	ENSG00000301147		4	rs56372422	189343665	T	A	0.94403	-2.44261	0.232846	1.97615e-16	3.71207e-10	1.47684e-08	FALSE
Glu-UL	ENSG00000063438	AHRR	5	rs11738699	196218	G	A	0.208955	-0.301086	0.060992	4.58899e-06	0.00273992	0.0186109	FALSE
Glu-UL	ENSG00000294384		5	rs4701724	6365576	T	C	0.526119	-0.358892	0.0460958	2.82747e-11	1.22424e-07	2.91337e-06	FALSE
Glu-UL	ENSG00000250490	LINC02145	5	rs4701724	6365576	T	C	0.526119	-0.281296	0.0400555	7.95895e-10	2.84077e-06	4.84635e-05	FALSE
Glu-UL	ENSG00000248131	LINC01194	5	rs6420018	12657946	C	G	0.235075	0.252565	0.0556138	2.06303e-05	0.00539882	0.0316084	FALSE
Glu-UL	ENSG00000039139	DNAH5	5	rs339961	14000444	T	G	0.391791	0.163238	0.0339277	7.43402e-06	0.0055268	0.032266	FALSE
Glu-UL	ENSG00000183580	FBXL7	5	rs7704277	15712963	T	C	0.615672	0.196856	0.0427677	1.63908e-05	0.00483233	0.029068	FALSE
Glu-UL	ENSG00000248150	LINC02150	5	rs17650129	16487221	G	T	0.197761	0.312608	0.0648709	7.22128e-06	0.00526715	0.0310487	FALSE
Glu-UL	ENSG00000303807		5	rs12656050	17142115	C	T	0.492537	-0.312059	0.055243	2.67269e-07	0.000323606	0.00317271	FALSE
Glu-UL	ENSG00000303861		5	rs55683003	31491710	T	A	0.951493	0.53132	0.108911	5.74283e-06	0.00469205	0.0284073	FALSE
Glu-UL	ENSG00000286543		5	rs12513577	34285561	C	A	0.906716	-0.695458	0.112091	2.65155e-08	6.96684e-05	0.000854619	FALSE
Glu-UL	ENSG00000112964	GHR	5	rs35500216	42521586	A	G	0.291045	0.328559	0.045393	3.11679e-10	3.88636e-07	8.34291e-06	TRUE
Glu-UL	ENSG00000172262	ZNF131	5	rs13171192	43102566	C	T	0.152985	-0.056641	0.0127089	2.82378e-05	0.00880022	0.046742	FALSE
Glu-UL	ENSG00000035499	DEPDC1B	5	rs16878165	60498997	T	C	0.0970149	-0.234029	0.0501239	1.27789e-05	0.00439741	0.0270842	FALSE
Glu-UL	ENSG00000049167	ERCC8	5	rs10071281	61088269	C	T	0.690298	0.0723001	0.0148408	5.89482e-06	0.00238472	0.0165696	FALSE
Glu-UL	ENSG00000086189	DIMT1	5	rs247231	62456260	C	G	0.41791	0.159611	0.0346515	1.61905e-05	0.00517247	0.0306086	FALSE
Glu-UL	ENSG00000183323	CCDC125	5	rs34862981	69303070	A	G	0.447761	0.182065	0.0273538	3.87743e-09	3.33553e-06	5.59773e-05	FALSE
Glu-UL	ENSG00000249437	NAIP	5	rs7446704	71366233	C	A	0.600746	0.293074	0.0512721	2.02865e-07	1.15821e-05	0.000171719	FALSE
Glu-UL	ENSG00000296380		5	rs7710143	71379903	A	G	0.686567	0.383342	0.0720837	1.02014e-06	6.60548e-05	0.00081829	FALSE
Glu-UL	ENSG00000285804		5	rs1217823	72098288	C	A	0.347015	-0.351133	0.0359749	4.72533e-15	5.61813e-11	2.60768e-09	TRUE
Glu-UL	ENSG00000176928	GCNT4	5	rs112612806	75288007	C	G	0.152985	-0.389136	0.0766316	2.64165e-06	0.00384994	0.0244579	FALSE
Glu-UL	ENSG00000113318	MSH3	5	rs1628627	80671443	A	T	0.25	-0.18927	0.0174978	4.83984e-17	3.29814e-12	1.97586e-10	FALSE
Glu-UL	ENSG00000152348	ATG10	5	rs74906189	81966104	A	G	0.220149	0.564983	0.0282337	5.05239e-32	1.62805e-25	1.67758e-22	FALSE
Glu-UL	ENSG00000186468	RPS23	5	rs226203	82274575	G	A	0.720149	0.25894	0.0535742	6.8339e-06	0.00843632	0.0451145	FALSE
Glu-UL	ENSG00000293465		5	rs226203	82274575	G	A	0.720149	-0.383244	0.0300215	1.36499e-20	1.14328e-15	1.49122e-13	FALSE
Glu-UL	ENSG00000248112		5	rs10462394	83058735	A	C	0.451493	1.26702	0.0748005	1.61404e-27	3.57094e-22	1.75218e-19	TRUE
Glu-UL	ENSG00000287862		5	rs6452769	88093210	G	A	0.264925	0.758331	0.0394404	6.41677e-31	6.29774e-25	5.40778e-22	TRUE
Glu-UL	ENSG00000081189	MEF2C	5	rs7700950	88941125	G	T	0.0634328	-0.260679	0.057808	2.32411e-05	0.00713277	0.0396001	FALSE
Glu-UL	ENSG00000164199	ADGRV1	5	rs171790	90520482	C	A	0.58209	0.200261	0.031189	1.05941e-08	1.49747e-05	0.000214616	FALSE
Glu-UL	ENSG00000185261	KIAA0825	5	rs2047318	94613899	C	A	0.208955	0.128227	0.0166875	4.42306e-11	1.37599e-07	3.21922e-06	FALSE
Glu-UL	ENSG00000198677	SKIC3	5	rs11949551	95601972	C	T	0.152985	0.122	0.0190154	1.08235e-08	1.40705e-05	0.000203632	FALSE
Glu-UL	ENSG00000173221	GLRX	5	rs8750	95814262	G	A	0.212687	0.329336	0.0466694	6.86255e-10	1.59934e-06	2.90652e-05	FALSE
Glu-UL	ENSG00000164307	ERAP1	5	rs2032890	96785448	A	C	0.261194	0.202572	0.0403852	3.36761e-06	0.00228544	0.0160311	FALSE
Glu-UL	ENSG00000250331	LINC01340	5	rs76849192	97183223	C	G	0.0559702	0.423177	0.0927697	1.91339e-05	0.00718992	0.0398102	TRUE
Glu-UL	ENSG00000250331	LINC01340	5	rs76849192	97183223	C	G	0.0559702	0.423177	0.0927697	1.91339e-05	0.00718992	0.0398102	TRUE
Glu-UL	ENSG00000173930	SLCO4C1	5	rs841922	102294992	T	G	0.63806	-0.700863	0.0563592	5.28726e-20	5.86829e-15	6.23384e-13	FALSE
Glu-UL	ENSG00000145730	PAM	5	rs187717	102764821	A	G	0.5	0.116536	0.0264761	3.46088e-05	0.00554536	0.0323377	FALSE
Glu-UL	ENSG00000297797		5	rs7707836	103563715	G	A	0.123134	0.389476	0.0703212	4.1915e-07	0.000373362	0.00358213	FALSE
Glu-UL	ENSG00000151422	FER	5	rs11741855	108724741	A	G	0.406716	0.0576965	0.0113887	2.76809e-06	0.00195316	0.0141036	FALSE
Glu-UL	ENSG00000286882		5	rs17161729	109324827	G	C	0.227612	0.617139	0.0543792	4.99256e-18	1.49454e-13	1.14075e-11	FALSE
Glu-UL	ENSG00000249476		5	rs246105	109337245	C	T	0.235075	0.645463	0.0511485	2.48353e-20	1.09533e-14	1.08524e-12	FALSE
Glu-UL	ENSG00000198961	PJA2	5	rs6873913	109306687	T	C	0.220149	0.138411	0.0195591	6.29808e-10	1.62403e-06	2.94619e-05	FALSE
Glu-UL	ENSG00000186952	TMEM232	5	rs4957910	110661287	G	T	0.25	0.254704	0.0234866	4.29341e-17	1.41314e-12	9.15809e-11	FALSE
Glu-UL	ENSG00000153037	SRP19	5	rs2707763	112773168	T	C	0.522388	-0.0942013	0.0198263	9.3508e-06	0.00600462	0.0345467	FALSE
Glu-UL	ENSG00000171444	MCC	5	rs6894937	113048099	C	T	0.466418	0.199274	0.0413829	7.31994e-06	0.00496069	0.0296414	TRUE
Glu-UL	ENSG00000248296		5	rs12516824	124636755	C	T	0.432836	0.541869	0.0579374	2.82637e-14	1.75977e-10	7.31173e-09	FALSE
Glu-UL	ENSG00000138829	FBN2	5	rs1363468	128665929	A	G	0.134328	0.301049	0.0631459	8.79092e-06	0.00484688	0.0291243	FALSE
Glu-UL	ENSG00000239642	MEIKIN	5	rs10066812	131661220	T	G	0.813433	-0.345951	0.0466634	1.44682e-10	2.14056e-07	4.79496e-06	FALSE
Glu-UL	ENSG00000224015		5	rs2550973	132175448	A	T	0.152985	-0.342268	0.0662742	1.87929e-06	0.000778653	0.00655509	FALSE
Glu-UL	ENSG00000131435	PDLIM4	5	rs12719454	132287991	G	T	0.630597	-0.233467	0.0454591	2.10472e-06	0.000935138	0.00764533	FALSE
Glu-UL	ENSG00000197208	SLC22A4	5	rs2243221	132667152	C	T	0.0820896	-0.269043	0.0585424	1.68409e-05	0.00612521	0.0351228	FALSE
Glu-UL	ENSG00000113621	TXNDC15	5	rs3733897	134887903	A	G	0.115672	0.801804	0.035406	1.58604e-35	2.2545e-29	7.74365e-26	FALSE
Glu-UL	ENSG00000031003	FAM13B	5	rs56002527	137589352	G	A	0.365672	-0.0559866	0.0114897	5.87115e-06	0.00211173	0.0150068	FALSE
Glu-UL	ENSG00000170464	DNAJC18	5	rs4315920	139409996	G	A	0.701493	-0.134736	0.0202309	3.81169e-09	5.92649e-06	9.22477e-05	TRUE
Glu-UL	ENSG00000171604	CXXC5	5	rs4912756	139691195	A	T	0.302239	-0.156339	0.0304019	2.05017e-06	0.000958418	0.00779461	FALSE
Glu-UL	ENSG00000146005	PSD2	5	rs60870216	139803222	C	G	0.287313	0.138062	0.0313573	3.44449e-05	0.00941503	0.0491712	FALSE
Glu-UL	ENSG00000158458	NRG2	5	rs265149	140022306	G	A	0.212687	0.160526	0.035665	2.39811e-05	0.00704869	0.0392613	FALSE
Glu-UL	ENSG00000213523	SRA1	5	rs11749712	140373797	T	A	0.447761	0.24248	0.0203593	4.69186e-19	1.03241e-14	1.03284e-12	FALSE
Glu-UL	ENSG00000204961	PCDHA9	5	rs269545	140952821	A	G	0.145522	-0.359591	0.05157	9.87678e-10	1.26507e-06	2.39445e-05	FALSE
Glu-UL	ENSG00000250120	PCDHA10	5	rs36095340	140861804	T	C	0.115672	-0.256187	0.0549078	1.29366e-05	0.0029075	0.019562	FALSE
Glu-UL	ENSG00000308869		5	rs252110	141959957	A	G	0.876866	-0.667708	0.0726054	5.61996e-14	6.23906e-10	2.39884e-08	TRUE
Glu-UL	ENSG00000187678	SPRY4	5	rs12655443	142088291	C	A	0.488806	0.283746	0.0567857	3.62992e-06	0.00293387	0.0196818	FALSE
Glu-UL	ENSG00000293852		5	rs17101607	144159025	G	C	0.164179	-0.272795	0.058362	1.25314e-05	0.0079396	0.0430814	FALSE
Glu-UL	ENSG00000183775	KCTD16	5	rs1428859	144379987	G	A	0.761194	-0.198132	0.0374089	1.11226e-06	0.000576038	0.00507319	FALSE
Glu-UL	ENSG00000133706	LARS1	5	rs13183171	146138425	A	G	0.190299	0.120085	0.0182766	5.59546e-09	9.74895e-06	0.000145588	FALSE
Glu-UL	ENSG00000164591	MYOZ3	5	rs10066581	150236118	A	G	0.843284	0.308848	0.0572566	7.51695e-07	0.000825449	0.00686491	FALSE
Glu-UL	ENSG00000291115		5	rs17800987	150943866	A	G	0.0895522	0.876868	0.0899121	4.89332e-15	6.59526e-11	3.00704e-09	FALSE
Glu-UL	ENSG00000145901	TNIP1	5	rs13160369	151072635	C	G	0.190299	0.178016	0.0322288	4.45515e-07	0.000492786	0.0044976	FALSE
Glu-UL	ENSG00000288081		5	rs187180	151468434	G	A	0.369403	0.546795	0.0531309	4.67327e-16	6.16894e-12	3.39927e-10	FALSE
Glu-UL	ENSG00000286749		5	rs6896664	151885713	A	G	0.268657	0.251236	0.0416945	5.61782e-08	8.38001e-05	0.00100641	FALSE
Glu-UL	ENSG00000310234		5	rs2926860	153831870	G	C	0.477612	0.680141	0.0566936	3.26525e-19	1.45907e-14	1.36678e-12	FALSE
Glu-UL	ENSG00000309402		5	rs2396999	154734554	A	T	0.869403	0.370222	0.0674469	5.12271e-07	0.000563473	0.00498383	FALSE
Glu-UL	ENSG00000285868		5	rs3822585	157479978	A	G	0.481343	-0.170645	0.0306755	3.79567e-07	0.000458648	0.00423478	FALSE
Glu-UL	ENSG00000135074	ADAM19	5	rs3822585	157479978	A	G	0.481343	-0.0876038	0.0183783	8.81861e-06	0.00588062	0.0340615	FALSE
Glu-UL	ENSG00000155858	LSM11	5	rs6882516	157755889	C	A	0.205224	0.18533	0.0339166	5.66379e-07	0.000612246	0.00533921	FALSE
Glu-UL	ENSG00000254186		5	rs299310	163483703	G	A	0.261194	-0.205346	0.0360087	2.14323e-07	0.000462412	0.00426571	FALSE
Glu-UL	ENSG00000040275	SPDL1	5	rs62376943	169279438	G	A	0.0671642	0.337407	0.060532	3.62761e-07	0.000575484	0.00507264	FALSE
Glu-UL	ENSG00000287814		5	rs75832233	172372478	C	A	0.0522388	1.22209	0.153834	1.40762e-11	2.51228e-07	5.56713e-06	FALSE
Glu-UL	ENSG00000113742	CPEB4	5	rs359454	173852109	A	T	0.208955	-0.083167	0.0167509	4.1091e-06	0.00426926	0.0265051	TRUE
Glu-UL	ENSG00000145911	N4BP3	5	rs7732936	178195340	C	T	0.186567	0.275363	0.0569757	6.84181e-06	0.00589046	0.0340993	FALSE
Glu-UL	ENSG00000291019	AACSP1	5	rs11249582	178834146	G	A	0.268657	-0.301445	0.0619223	5.97686e-06	0.00848797	0.0453171	FALSE
Glu-UL	ENSG00000304231		5	rs11740569	179714715	C	G	0.313433	0.199506	0.0315034	1.54004e-08	3.87289e-05	0.000505794	FALSE
Glu-UL	ENSG00000271727		6	rs9502452	694849	A	C	0.791045	-0.197297	0.0314254	1.9408e-08	4.06793e-05	0.000526594	FALSE
Glu-UL	ENSG00000272279		6	rs2816278	1523830	C	T	0.145522	-0.28073	0.0564075	3.92332e-06	0.00523929	0.0309026	TRUE
Glu-UL	ENSG00000164385	LINC01600	6	rs9501863	2623189	C	T	0.208955	0.273848	0.0385155	5.4436e-10	1.24924e-06	2.37062e-05	FALSE
Glu-UL	ENSG00000302483		6	rs160703	2784337	G	A	0.208955	-0.336445	0.0655665	2.1415e-06	0.00276238	0.0187264	FALSE
Glu-UL	ENSG00000180822	PSMG4	6	rs2807692	3232987	G	C	0.0970149	-0.187087	0.0264213	6.17961e-10	1.46835e-06	2.70666e-05	FALSE
Glu-UL	ENSG00000228793		6	rs226959	3727577	C	G	0.630597	0.409113	0.0609527	3.04758e-09	5.78636e-06	9.0614e-05	FALSE
Glu-UL	ENSG00000230648		6	rs3761787	4039241	G	A	0.764925	-0.217058	0.0351598	3.02085e-08	5.7895e-05	0.000726631	TRUE
Glu-UL	ENSG00000285216		6	rs1832098	8446667	C	G	0.470149	-0.252515	0.0264754	1.25397e-14	1.32961e-10	5.68489e-09	FALSE
Glu-UL	ENSG00000285219	HULC	6	rs1932277	8449438	A	T	0.559702	-0.293782	0.0323161	8.94468e-14	6.33358e-10	2.42612e-08	FALSE
Glu-UL	ENSG00000285219	HULC	6	rs1932277	8449438	A	T	0.559702	-0.293782	0.0323161	8.94468e-14	6.33358e-10	2.42612e-08	FALSE
Glu-UL	ENSG00000111846	GCNT2	6	rs669331	10554377	C	T	0.395522	-0.147212	0.0294431	3.58627e-06	0.003553	0.0228961	FALSE
Glu-UL	ENSG00000137210	TMEM14B	6	rs2009118	10817272	A	G	0.794776	0.111052	0.0169856	6.42744e-09	2.00603e-05	0.000278955	FALSE
Glu-UL	ENSG00000272162		6	rs518204	10829086	C	T	0.716418	0.211354	0.0311294	2.18229e-09	4.17066e-06	6.84323e-05	FALSE
Glu-UL	ENSG00000153157	SYCP2L	6	rs2018035	10758724	C	T	0.104478	-0.227488	0.0370796	3.54959e-08	4.58171e-05	0.000586473	FALSE
Glu-UL	ENSG00000247925		6	rs111238689	11096753	G	A	0.246269	-0.287533	0.0238816	2.72734e-19	1.16005e-14	1.13842e-12	FALSE
Glu-UL	ENSG00000111859	NEDD9	6	rs34801872	11210335	C	G	0.376866	0.132413	0.0274428	7.05295e-06	0.00582179	0.0338158	FALSE
Glu-UL	ENSG00000145979	TBC1D7	6	rs498338	13318633	G	A	0.242537	0.202687	0.026398	4.53896e-11	1.20186e-07	2.88005e-06	FALSE
Glu-UL	ENSG00000145979	TBC1D7	6	rs498338	13318633	G	A	0.242537	0.202687	0.026398	4.53896e-11	1.20186e-07	2.88005e-06	FALSE
Glu-UL	ENSG00000309730		6	rs4715639	13887003	A	G	0.473881	0.249723	0.0480753	1.66888e-06	0.00133248	0.0101856	FALSE
Glu-UL	ENSG00000286885		6	rs6916441	17604875	A	C	0.253731	-0.226507	0.0416074	6.14927e-07	0.000482384	0.00442224	FALSE
Glu-UL	ENSG00000286954		6	rs55666684	22208445	A	G	0.410448	-0.206895	0.044046	1.14834e-05	0.00927506	0.0486207	FALSE
Glu-UL	ENSG00000112293	GPLD1	6	rs12190816	24499901	C	T	0.287313	0.135429	0.0240798	2.95643e-07	0.000457786	0.00423096	FALSE
Glu-UL	ENSG00000112308	C6orf62	6	rs2143338	24683053	T	C	0.253731	0.217118	0.02747	1.68172e-11	7.80972e-08	1.9485e-06	FALSE
Glu-UL	ENSG00000026950	BTN3A1	6	rs9467722	26352338	T	C	0.429104	0.254297	0.043646	1.28728e-07	9.71898e-05	0.00114584	FALSE
Glu-UL	ENSG00000112763	BTN2A1	6	rs12208211	26565332	A	G	0.0970149	-0.217945	0.0426232	2.29945e-06	0.00112282	0.00881175	FALSE
Glu-UL	ENSG00000182952	HMGN4	6	rs2255070	26501549	C	G	0.436567	0.19291	0.0405527	9.1497e-06	0.00376326	0.024052	TRUE
Glu-UL	ENSG00000290474		6	rs4521582	26836003	A	G	0.608209	0.447008	0.0373283	3.57541e-19	4.23349e-14	3.6052e-12	FALSE
Glu-UL	ENSG00000124613	ZNF391	6	rs4713090	27383068	C	T	0.75	0.268746	0.0515974	1.57813e-06	0.000976447	0.00791624	FALSE
Glu-UL	ENSG00000302043		6	rs2056924	27722395	G	A	0.354478	-0.2508	0.0459129	5.70435e-07	0.000264706	0.00267993	FALSE
Glu-UL	ENSG00000197062	ZSCAN26	6	rs1150690	28197520	C	T	0.451493	-0.136212	0.0215472	1.61565e-08	1.99803e-05	0.000278218	FALSE
Glu-UL	ENSG00000187987	ZSCAN23	6	rs414745	28558878	A	C	0.358209	0.141893	0.0251431	2.73287e-07	0.000130736	0.00146269	FALSE
Glu-UL	ENSG00000290870		6	rs116706170	29940638	G	A	0.108209	0.68933	0.084094	4.61525e-12	5.33322e-08	1.40191e-06	FALSE
Glu-UL	ENSG00000310474		6	rs407238	29839124	C	G	0.641791	-0.378687	0.0476596	1.39866e-11	1.71361e-07	3.92388e-06	FALSE
Glu-UL	ENSG00000231074	HCG18	6	rs962899	30259034	C	G	0.25	-0.088367	0.0145246	4.40109e-08	8.73815e-05	0.00104698	TRUE
Glu-UL	ENSG00000231074	HCG18	6	rs962899	30259034	C	G	0.25	-0.088367	0.0145246	4.40109e-08	8.73815e-05	0.00104698	TRUE
Glu-UL	ENSG00000204536	CCHCR1	6	rs130068	31148469	G	A	0.447761	0.168975	0.032365	1.5024e-06	0.00270006	0.0183523	FALSE
Glu-UL	ENSG00000206344	HCG27	6	rs3131008	31130604	A	G	0.80597	0.357348	0.0571757	2.18715e-08	0.000104775	0.00122406	FALSE
Glu-UL	ENSG00000272501		6	rs9500877	31191459	T	C	0.190299	0.320807	0.0651202	4.77209e-06	0.00671513	0.0378732	FALSE
Glu-UL	ENSG00000204520	MICA	6	rs59727727	31362020	T	C	0.152985	0.387208	0.0655677	9.27197e-08	0.000409381	0.00385238	FALSE
Glu-UL	ENSG00000204428	LY6G5C	6	rs1266073	31699251	C	A	0.268657	-0.645527	0.0503498	1.08962e-20	2.77866e-14	2.42644e-12	FALSE
Glu-UL	ENSG00000204396	VWA7	6	rs2736426	31777507	C	T	0.529851	0.3963	0.0409861	7.04838e-15	5.72569e-10	2.2097e-08	FALSE
Glu-UL	ENSG00000299769		6	rs62404579	32408242	G	T	0.0858209	0.523923	0.104782	3.58318e-06	0.00807154	0.0436364	FALSE
Glu-UL	ENSG00000299747		6	rs28895061	32449616	C	T	0.182836	0.470757	0.0896537	1.33381e-06	0.00232402	0.0162391	FALSE
Glu-UL	ENSG00000204267	TAP2	6	rs1055559	32865009	C	T	0.914179	0.452307	0.0883222	2.22986e-06	0.00324642	0.0212663	FALSE
Glu-UL	ENSG00000124562	SNRPC	6	rs9296128	34777905	G	A	0.373134	-0.168924	0.0316471	9.42699e-07	0.000719668	0.00614385	FALSE
Glu-UL	ENSG00000112053	SLC26A8	6	rs851036	36018925	C	G	0.432836	0.183304	0.0342749	9.04486e-07	0.000585898	0.00513807	FALSE
Glu-UL	ENSG00000156711	MAPK13	6	rs851007	36096259	G	A	0.496269	-0.330108	0.0331039	1.87672e-15	1.33347e-11	6.90472e-10	FALSE
Glu-UL	ENSG00000112130	RNF8	6	rs2284923	37381144	C	T	0.477612	-0.170386	0.0213714	1.24213e-11	6.132e-08	1.57178e-06	FALSE
Glu-UL	ENSG00000183826	BTBD9	6	rs111624546	38605235	C	T	0.16791	0.0984255	0.0191194	2.00585e-06	0.00196626	0.0141783	FALSE
Glu-UL	ENSG00000164627	KIF6	6	rs80267165	39617080	T	C	0.0634328	0.701391	0.0980225	4.46923e-10	1.4854e-06	2.72348e-05	FALSE
Glu-UL	ENSG00000112576	CCND3	6	rs6917738	42057807	A	C	0.108209	-0.507713	0.0582823	4.77077e-13	3.83815e-09	1.30125e-07	FALSE
Glu-UL	ENSG00000112599	GUCA1B	6	rs2395805	42196101	A	T	0.593284	0.358719	0.0361124	2.21982e-15	3.10214e-11	1.50779e-09	FALSE
Glu-UL	ENSG00000170734	POLH	6	rs16896609	43622671	G	A	0.104478	0.129886	0.0236782	5.19842e-07	0.000504634	0.00457735	FALSE
Glu-UL	ENSG00000178233	TMEM151B	6	rs79067180	44292000	G	C	0.0559702	-0.280545	0.0536016	1.42681e-06	0.00158853	0.0118441	FALSE
Glu-UL	ENSG00000001561	ENPP4	6	rs7764113	45830296	A	G	0.600746	-0.148892	0.0325485	1.82347e-05	0.00846497	0.0452412	FALSE
Glu-UL	ENSG00000112796	ENPP5	6	rs9349345	46083205	G	A	0.350746	0.191974	0.0408116	1.11971e-05	0.00562673	0.0327751	FALSE
Glu-UL	ENSG00000180113	TDRD6	6	rs34964632	46680392	A	G	0.324627	-0.322016	0.045257	5.32181e-10	8.85095e-07	1.7405e-05	FALSE
Glu-UL	ENSG00000151917	BEND6	6	rs7760435	56969634	A	T	0.223881	-0.241584	0.0334682	3.39793e-10	4.70149e-07	9.87016e-06	FALSE
Glu-UL	ENSG00000146143	PRIM2	6	rs12199424	57414590	A	G	0.261194	0.0798113	0.0181425	3.49168e-05	0.00703623	0.0392332	FALSE
Glu-UL	ENSG00000288088		6	rs13210869	68576237	C	A	0.160448	-0.388116	0.0626667	2.77827e-08	3.88163e-05	0.00050625	TRUE
Glu-UL	ENSG00000243501		6	rs12529864	73284874	C	T	0.130597	0.345726	0.0658293	1.32843e-06	0.000845698	0.00702198	FALSE
Glu-UL	ENSG00000196586	MYO6	6	rs1280050	75827088	A	G	0.503731	0.136894	0.0198759	1.42977e-09	1.53114e-06	2.79189e-05	FALSE
Glu-UL	ENSG00000302932		6	rs1557160	77367839	T	C	0.619403	0.31151	0.0549999	2.51356e-07	0.000226741	0.00232708	FALSE
Glu-UL	ENSG00000298976		6	rs113237224	82887475	G	A	0.227612	0.515896	0.0623705	3.32462e-12	1.30763e-08	3.91691e-07	FALSE
Glu-UL	ENSG00000135315	CEP162	6	rs2324636	84119220	A	G	0.0783582	0.127283	0.0256231	4.06785e-06	0.00191301	0.013872	FALSE
Glu-UL	ENSG00000118432	CNR1	6	rs806368	88140381	T	C	0.160448	-0.152231	0.0306149	3.99084e-06	0.00353592	0.0228289	FALSE
Glu-UL	ENSG00000309618		6	rs9451129	89059439	A	G	0.787313	-0.133189	0.0265697	3.40978e-06	0.00214342	0.0151796	FALSE
Glu-UL	ENSG00000304803		6	rs7747353	90602120	C	A	0.701493	0.256062	0.0523494	5.46343e-06	0.00333747	0.0217659	FALSE
Glu-UL	ENSG00000286084		6	rs9486079	105404103	T	G	0.320896	0.239948	0.0326921	2.00076e-10	4.37932e-07	9.22814e-06	FALSE
Glu-UL	ENSG00000284999		6	rs72943438	106144961	G	A	0.115672	-0.333355	0.0665768	3.48708e-06	0.00497723	0.0296969	FALSE
Glu-UL	ENSG00000178409	BEND3	6	rs4946811	107099312	A	C	0.317164	0.167276	0.0291936	1.91656e-07	0.000251771	0.00256862	FALSE
Glu-UL	ENSG00000185250	PPIL6	6	rs13201430	109634847	C	T	0.429104	0.131823	0.0269039	5.2896e-06	0.00186486	0.013561	FALSE
Glu-UL	ENSG00000155085	AK9	6	rs12528774	109936786	A	T	0.462687	-0.0813395	0.0156984	1.75728e-06	0.000850127	0.00705307	FALSE
Glu-UL	ENSG00000298854		6	rs10434875	111028248	A	C	0.156716	0.466128	0.0775936	6.06581e-08	4.65467e-05	0.000593	FALSE
Glu-UL	ENSG00000173214	MFSD4B	6	rs145787392	111255468	T	G	0.682836	0.137963	0.0263484	1.41446e-06	0.000906494	0.00744812	FALSE
Glu-UL	ENSG00000196591	HDAC2	6	rs13216873	113962224	A	T	0.264925	0.0785071	0.0161601	6.21267e-06	0.00352698	0.0227873	FALSE
Glu-UL	ENSG00000178425	NT5DC1	6	rs9400888	116101371	C	T	0.496269	0.190279	0.0346038	4.92501e-07	0.00036695	0.00352719	TRUE
Glu-UL	ENSG00000300203		6	rs9400935	116597636	T	A	0.182836	-0.360114	0.0517825	1.07023e-09	1.86308e-06	3.30993e-05	FALSE
Glu-UL	ENSG00000111860	CEP85L	6	rs55892056	118674134	C	T	0.440298	-0.0779186	0.0169935	1.75169e-05	0.00694478	0.0388284	FALSE
Glu-UL	ENSG00000253194		6	rs4946371	118935483	A	G	0.414179	0.432832	0.0355428	1.53699e-19	4.5878e-15	5.02913e-13	FALSE
Glu-UL	ENSG00000111885	MAN1A1	6	rs13200922	119848270	A	G	0.227612	-0.251203	0.0560288	2.55878e-05	0.00903819	0.0477353	FALSE
Glu-UL	ENSG00000146350	TBC1D32	6	rs4458731	121221212	G	A	0.932836	-0.119337	0.0261392	1.88594e-05	0.00654603	0.0370821	TRUE
Glu-UL	ENSG00000294893		6	rs7749127	122829089	G	A	0.235075	0.411245	0.0541559	6.57501e-11	1.24909e-07	2.95204e-06	FALSE
Glu-UL	ENSG00000304495		6	rs73579724	125238531	A	G	0.0634328	-0.401482	0.0826639	6.24317e-06	0.00447393	0.0274735	FALSE
Glu-UL	ENSG00000111906	HDDC2	6	rs6931535	125278923	C	T	0.164179	-0.353996	0.0491521	3.64744e-10	6.23748e-07	1.26521e-05	FALSE
Glu-UL	ENSG00000299250		6	rs11556354	127343516	G	A	0.548507	0.105686	0.0142669	1.48508e-10	2.81252e-07	6.16615e-06	TRUE
Glu-UL	ENSG00000146376	ARHGAP18	6	rs3752536	129710070	T	C	0.843284	-0.24485	0.0491565	3.85943e-06	0.00450018	0.0275289	TRUE
Glu-UL	ENSG00000198945	L3MBTL3	6	rs6569648	130027974	C	T	0.794776	-0.13383	0.0233501	1.90408e-07	0.000261232	0.00265464	FALSE
Glu-UL	ENSG00000118514	ALDH8A1	6	rs9376072	134959381	G	C	0.429104	-0.388607	0.0396791	4.0858e-15	3.79917e-11	1.80403e-09	FALSE
Glu-UL	ENSG00000135541	AHI1	6	rs7750586	135506535	A	G	0.376866	-0.46921	0.0333358	7.21326e-23	9.09655e-18	1.7358e-15	TRUE
Glu-UL	ENSG00000051620	HEBP2	6	rs4896351	138400627	T	C	0.0895522	-0.441782	0.0570324	3.3656e-11	1.4282e-07	3.32952e-06	FALSE
Glu-UL	ENSG00000024862	CCDC28A	6	rs6570265	138708489	C	G	0.365672	-0.150069	0.0309847	6.57548e-06	0.00514974	0.0305317	FALSE
Glu-UL	ENSG00000146386	ABRACL	6	rs9376396	139028014	A	C	0.432836	0.131241	0.0261907	3.43454e-06	0.00307726	0.0204441	TRUE
Glu-UL	ENSG00000288551		6	rs1884364	146016681	C	G	0.313433	0.162746	0.0342652	9.41182e-06	0.00237917	0.0165422	FALSE
Glu-UL	ENSG00000112425	EPM2A	6	rs1737185	145663559	C	T	0.44403	0.13226	0.0192019	1.42713e-09	1.48461e-06	2.72348e-05	FALSE
Glu-UL	ENSG00000164506	STXBP5	6	rs499393	147182236	C	A	0.574627	-0.0660878	0.0137614	7.69315e-06	0.00399676	0.0251119	FALSE
Glu-UL	ENSG00000186625	KATNA1	6	rs141120557	149722244	C	A	0.0485075	-0.202354	0.0420527	7.41818e-06	0.00528843	0.0311315	FALSE
Glu-UL	ENSG00000131019	ULBP3	6	rs2010440	150063961	T	C	0.902985	-0.406445	0.0806024	3.03513e-06	0.00308266	0.0204668	FALSE
Glu-UL	ENSG00000074706	IPCEF1	6	rs6914988	154406986	A	G	0.541045	-0.194525	0.0385204	2.94933e-06	0.00227567	0.0159844	FALSE
Glu-UL	ENSG00000303608		6	rs12209018	159096027	C	A	0.104478	-0.328814	0.0670973	5.2737e-06	0.00423602	0.0264379	FALSE
Glu-UL	ENSG00000286533		6	rs1853259	159726409	A	G	0.175373	0.354424	0.0516298	1.57742e-09	3.01874e-06	5.1161e-05	TRUE
Glu-UL	ENSG00000276960		6	rs1084659	160742745	A	G	0.41791	0.269192	0.0429384	2.01607e-08	3.1056e-05	0.000414518	FALSE
Glu-UL	ENSG00000287558		6	rs783169	160753547	T	C	0.5	0.532994	0.0446159	4.03191e-19	1.60811e-14	1.47949e-12	FALSE
Glu-UL	ENSG00000112530	PACRG	6	rs2156257	162679678	G	T	0.11194	0.500667	0.0416923	3.10777e-19	3.36238e-14	2.88723e-12	FALSE
Glu-UL	ENSG00000298421		6	rs7381389	167440497	A	G	0.294776	0.411559	0.0569503	3.27657e-10	1.13655e-06	2.17683e-05	FALSE
Glu-UL	ENSG00000226194	LINC02519	6	rs4716385	169727512	G	T	0.0970149	0.393538	0.0629595	2.18122e-08	4.65573e-05	0.000593	FALSE
Glu-UL	ENSG00000285733		6	rs41265385	169667990	C	T	0.0895522	0.352644	0.0618329	2.13881e-07	0.000286748	0.00285205	FALSE
Glu-UL	ENSG00000231690	LINC00574	6	rs6459664	169780511	G	A	0.208955	-0.252528	0.0458716	4.80061e-07	0.000610912	0.00533473	FALSE
Glu-UL	ENSG00000112584	FAM120B	6	rs12196499	170326812	C	T	0.787313	0.0826669	0.0142548	1.43985e-07	0.000343546	0.00333017	FALSE
Glu-UL	ENSG00000261003		6	rs910426	170313953	T	C	0.940298	-0.453381	0.0844129	8.24898e-07	0.000736289	0.00625982	FALSE
Glu-UL	ENSG00000164828	SUN1	7	rs56335616	828184	A	G	0.175373	-0.0894795	0.0184791	6.60379e-06	0.00705269	0.0392613	FALSE
Glu-UL	ENSG00000310291		7	rs10277990	1180020	A	C	0.354478	0.279424	0.0538613	1.71299e-06	0.00204084	0.014624	FALSE
Glu-UL	ENSG00000164849	GPR146	7	rs2363285	1052008	C	T	0.608209	-0.324968	0.0518272	2.00784e-08	3.8862e-05	0.00050625	TRUE
Glu-UL	ENSG00000146540	C7orf50	7	rs74976697	1120869	C	T	0.156716	-0.120247	0.0186736	9.79059e-09	2.04232e-05	0.000283237	FALSE
Glu-UL	ENSG00000164880	INTS1	7	rs4720789	1465340	C	T	0.776119	-0.182185	0.028784	1.56283e-08	3.12651e-05	0.000416232	FALSE
Glu-UL	ENSG00000106266	SNX8	7	rs2301942	2354661	C	T	0.481343	0.325103	0.0260037	4.01978e-20	3.06532e-15	3.50953e-13	TRUE
Glu-UL	ENSG00000196204	RNF216P1	7	rs117967248	4998950	C	T	0.0746269	0.387745	0.0733126	1.14589e-06	0.00230269	0.0161302	FALSE
Glu-UL	ENSG00000164638	SLC29A4	7	rs6958051	5298006	G	A	0.25	0.17586	0.0253402	1.13917e-09	4.61097e-06	7.47222e-05	FALSE
Glu-UL	ENSG00000155034	FBXL18	7	rs10951956	5481837	G	A	0.145522	0.184813	0.0316248	1.19682e-07	0.000224717	0.00230862	FALSE
Glu-UL	ENSG00000290835		7	rs7786706	6707636	C	T	0.235075	-0.226072	0.0294558	4.60214e-11	2.16334e-07	4.82501e-06	FALSE
Glu-UL	ENSG00000169402	RSPH10B2	7	rs4476910	6845133	A	C	0.522388	-0.20985	0.0431616	6.12035e-06	0.00521107	0.030789	FALSE
Glu-UL	ENSG00000146574	CCZ1B	7	rs113745104	6827625	G	A	0.0634328	-0.501973	0.0707346	5.77317e-10	4.35579e-06	7.10176e-05	FALSE
Glu-UL	ENSG00000106392	C1GALT1	7	rs10246303	7246814	A	T	0.451493	0.164295	0.020983	2.32833e-11	1.43221e-07	3.33134e-06	FALSE
Glu-UL	ENSG00000230825	LINC03016	7	rs4724965	7267401	A	G	0.220149	0.690743	0.0638796	4.91387e-17	2.08312e-12	1.30091e-10	FALSE
Glu-UL	ENSG00000215018	COL28A1	7	rs4724995	7487556	C	T	0.802239	0.29941	0.052322	1.97601e-07	0.000499096	0.00454312	FALSE
Glu-UL	ENSG00000300984		7	rs11768526	12103769	G	A	0.175373	0.387518	0.0554175	9.06348e-10	5.16268e-06	8.2095e-05	FALSE
Glu-UL	ENSG00000146530	VWDE	7	rs74753576	12424300	G	A	0.126866	0.418884	0.0787406	1.0129e-06	0.00165931	0.0122918	TRUE
Glu-UL	ENSG00000226329		7	rs62449838	22860198	G	C	0.369403	-0.280358	0.0484447	1.51349e-07	0.000211867	0.00219189	FALSE
Glu-UL	ENSG00000122591	HYCC1	7	rs10248219	22959588	A	G	0.283582	-0.117764	0.0227453	1.78457e-06	0.00145053	0.0109821	FALSE
Glu-UL	ENSG00000136243	NUP42	7	rs6964665	23171733	G	A	0.380597	-0.176869	0.0260423	2.16292e-09	4.30116e-06	7.03495e-05	FALSE
Glu-UL	ENSG00000105928	GSDME	7	rs39455	25099390	C	T	0.264925	-0.101817	0.020101	2.77676e-06	0.00292242	0.0196434	FALSE
Glu-UL	ENSG00000301643		7	rs1229664	26399079	G	A	0.414179	-0.672361	0.0581707	2.05631e-18	7.35771e-14	5.92309e-12	TRUE
Glu-UL	ENSG00000180354	MTURN	7	rs6953710	30172172	C	T	0.425373	0.088546	0.0166269	9.90135e-07	0.00077054	0.00650272	TRUE
Glu-UL	ENSG00000305335		7	rs1558064	30603453	C	A	0.604478	-0.462745	0.0551459	1.95906e-12	1.21322e-08	3.64469e-07	FALSE
Glu-UL	ENSG00000241644	INMT	7	rs1074373	30577145	A	C	0.690298	-0.397517	0.0571502	1.06424e-09	2.3162e-06	4.01796e-05	FALSE
Glu-UL	ENSG00000180347	ITPRID1	7	rs2191337	31554173	G	T	0.145522	-0.323373	0.0628486	2.02707e-06	0.00203012	0.0145573	TRUE
Glu-UL	ENSG00000293076		7	rs17365780	32589789	T	C	0.13806	-0.130207	0.01872	1.06479e-09	2.74741e-06	4.70266e-05	FALSE
Glu-UL	ENSG00000293957		7	rs73098273	32828982	T	G	0.0634328	-0.309789	0.0592682	1.46706e-06	0.00107063	0.00847965	FALSE
Glu-UL	ENSG00000164610	RP9	7	rs11535141	32981197	G	C	0.776119	-0.139106	0.0301084	1.53609e-05	0.0079206	0.0430236	FALSE
Glu-UL	ENSG00000122507	BBS9	7	rs1050719	33605329	T	C	0.317164	0.155906	0.0149892	2.90451e-16	7.28488e-12	3.9508e-10	FALSE
Glu-UL	ENSG00000287249		7	rs170649	35035347	A	C	0.526119	0.119877	0.0246729	6.19854e-06	0.00393218	0.0248731	FALSE
Glu-UL	ENSG00000173852	DPY19L1	7	rs1637684	34972450	T	C	0.615672	0.174762	0.026381	4.43655e-09	7.62254e-06	0.000116362	FALSE
Glu-UL	ENSG00000287032		7	rs10280032	35637911	G	C	0.406716	0.1391	0.0259759	8.79744e-07	0.00092898	0.0076032	FALSE
Glu-UL	ENSG00000136250	AOAH	7	rs3807163	36869154	T	C	0.208955	-0.191061	0.0333472	1.91994e-07	0.000262761	0.00266659	FALSE
Glu-UL	ENSG00000086289	EPDR1	7	rs2722275	37948618	G	A	0.429104	0.226686	0.0398208	2.23323e-07	0.000266636	0.00269097	FALSE
Glu-UL	ENSG00000006715	VPS41	7	rs2189855	38731712	G	T	0.212687	-0.106192	0.0196115	6.9167e-07	0.000720772	0.00614818	FALSE
Glu-UL	ENSG00000136279	DBNL	7	rs2442390	43931305	C	A	0.0447761	0.363341	0.0615358	9.30777e-08	7.28981e-05	0.000888947	FALSE
Glu-UL	ENSG00000136271	DDX56	7	rs35585318	44852220	T	C	0.384328	0.102694	0.0223744	1.72177e-05	0.00836398	0.0448878	FALSE
Glu-UL	ENSG00000158683	PKD1L1	7	rs10281977	47923102	G	A	0.664179	-0.265864	0.0414601	1.09774e-08	2.54689e-05	0.000345313	FALSE
Glu-UL	ENSG00000132436	FIGNL1	7	rs11764792	50429143	C	T	0.492537	0.383334	0.0385822	2.19962e-15	3.46514e-11	1.66849e-09	FALSE
Glu-UL	ENSG00000249773		7	rs28895377	55833754	A	T	0.182836	0.233915	0.0483793	6.78834e-06	0.00381092	0.0242699	FALSE
Glu-UL	ENSG00000178665	ZNF713	7	rs6947698	55887300	G	C	0.402985	-0.212133	0.0295501	4.03685e-10	1.1512e-06	2.20079e-05	TRUE
Glu-UL	ENSG00000164776	PHKG1	7	rs55863006	56057061	C	T	0.223881	-0.190496	0.0407444	1.24741e-05	0.00506892	0.0301219	FALSE
Glu-UL	ENSG00000214652	ZNF727	7	rs639340	64360531	G	A	0.44403	-0.470798	0.0875655	8.06767e-07	0.000566189	0.00500356	FALSE
Glu-UL	ENSG00000308846		7	rs75574941	64377527	A	G	0.175373	-0.545175	0.119522	1.91553e-05	0.00787816	0.0428609	FALSE
Glu-UL	ENSG00000196247	ZNF107	7	rs13230561	64652935	G	A	0.402985	-0.221567	0.0292309	6.9861e-11	3.48342e-07	7.57257e-06	FALSE
Glu-UL	ENSG00000306252		7	rs4273745	64848308	C	A	0.451493	0.447973	0.0791977	2.59127e-07	0.000170919	0.00184225	FALSE
Glu-UL	ENSG00000198039	ZNF273	7	rs1965558	64860989	A	G	0.38806	0.425635	0.0444267	1.03897e-14	1.07514e-10	4.7547e-09	FALSE
Glu-UL	ENSG00000227113		7	rs10280883	65257000	T	C	0.455224	-0.323543	0.0417431	3.29768e-11	1.19144e-07	2.86174e-06	FALSE
Glu-UL	ENSG00000296823		7	rs35070250	65480039	G	A	0.391791	1.01183	0.0728689	1.52102e-22	4.3308e-17	7.10864e-15	FALSE
Glu-UL	ENSG00000296802		7	rs9638216	65001701	A	G	0.414179	-0.180397	0.0298042	5.01545e-08	4.5535e-05	0.000583587	FALSE
Glu-UL	ENSG00000295782		7	rs10280883	65257000	T	C	0.455224	-0.569365	0.0822276	1.21923e-09	7.21563e-07	1.444e-05	FALSE
Glu-UL	ENSG00000235421		7	rs35070250	65480039	G	A	0.391791	1.16777	0.0963268	1.93031e-19	3.22521e-15	3.61517e-13	FALSE
Glu-UL	ENSG00000169902	TPST1	7	rs2420827	66682114	G	A	0.395522	-0.0735217	0.0141919	1.76318e-06	0.000272713	0.00273889	TRUE
Glu-UL	ENSG00000179406	LINC00174	7	rs62470940	65995848	C	T	0.0746269	0.218319	0.0381471	1.9707e-07	4.15654e-05	0.000536717	FALSE
Glu-UL	ENSG00000284461		7	rs4078376	66325672	G	A	0.630597	0.162963	0.014656	1.32604e-17	3.90098e-13	2.77218e-11	FALSE
Glu-UL	ENSG00000154710	RABGEF1	7	rs778728	66361475	T	C	0.373134	-0.0722966	0.0127608	2.49591e-07	0.000105334	0.00122643	FALSE
Glu-UL	ENSG00000291154		7	rs113330369	67257384	C	T	0.171642	-0.135562	0.016253	2.44936e-12	2.73691e-08	7.64924e-07	FALSE
Glu-UL	ENSG00000165171	METTL27	7	rs6974378	73828809	T	C	0.723881	-0.560773	0.0596592	2.29949e-14	1.77767e-10	7.32702e-09	FALSE
Glu-UL	ENSG00000196275	GTF2IRD2	7	rs35830875	75040033	A	G	0.115672	0.228922	0.0458897	3.74849e-06	0.000854446	0.00707445	FALSE
Glu-UL	ENSG00000290951		7	rs794347	75511830	C	A	0.902985	-0.439732	0.0486408	1.11721e-13	7.69819e-10	2.91632e-08	FALSE
Glu-UL	ENSG00000223705	NSUN5P1	7	rs236651	75415552	A	G	0.365672	-0.391663	0.0602599	7.57504e-09	9.73682e-06	0.000145588	FALSE
Glu-UL	ENSG00000272391	POM121C	7	rs236671	75432140	G	A	0.354478	-0.133331	0.0131845	1.01594e-15	1.02975e-11	5.44145e-10	FALSE
Glu-UL	ENSG00000127946	HIP1	7	rs75030876	75616766	C	T	0.0634328	-0.1037	0.0212817	5.87207e-06	0.00314155	0.0207375	FALSE
Glu-UL	ENSG00000188372	ZP3	7	rs2949288	76545947	G	A	0.608209	0.242226	0.0488116	4.14868e-06	0.00186102	0.0135469	FALSE
Glu-UL	ENSG00000091073	DTX2	7	rs1628255	76481232	A	G	0.503731	-0.15475	0.0307934	3.24594e-06	0.00154664	0.011587	FALSE
Glu-UL	ENSG00000290873	LINC03009	7	rs1636645	76602279	T	C	0.593284	-0.304434	0.0247214	8.71736e-20	1.22938e-14	1.19507e-12	FALSE
Glu-UL	ENSG00000146707	POMZP3	7	rs1636645	76602279	T	C	0.593284	-0.197033	0.030983	1.3759e-08	1.92721e-05	0.000270182	FALSE
Glu-UL	ENSG00000296620		7	rs38709	76728521	A	G	0.511194	-0.235757	0.05112	1.58515e-05	0.006247	0.0356624	FALSE
Glu-UL	ENSG00000205482	SPDYE18	7	rs139866122	77008906	A	G	0.320896	0.273852	0.044733	3.75251e-08	5.33007e-05	0.000672244	FALSE
Glu-UL	ENSG00000186088	GSAP	7	rs4727381	77416640	A	G	0.626866	0.185788	0.0323941	1.87472e-07	0.000172758	0.00185625	TRUE
Glu-UL	ENSG00000127947	PTPN12	7	rs55860308	77616657	G	T	0.25	-0.106213	0.015146	8.31307e-10	2.18511e-06	3.82273e-05	FALSE
Glu-UL	ENSG00000214293	APTR	7	rs4727454	77663754	A	G	0.328358	0.139013	0.029422	1.03439e-05	0.00857734	0.0457383	FALSE
Glu-UL	ENSG00000019991	HGF	7	rs4728495	82070861	T	A	0.847015	0.300914	0.0619869	6.29918e-06	0.0082962	0.0445704	FALSE
Glu-UL	ENSG00000198822	GRM3	7	rs2299218	86706496	C	T	0.152985	0.194502	0.0368857	1.22061e-06	0.000669125	0.00578344	TRUE
Glu-UL	ENSG00000005471	ABCB4	7	rs2178658	87492706	G	T	0.287313	0.351542	0.0568774	2.93018e-08	2.02043e-05	0.00028058	FALSE
Glu-UL	ENSG00000223665		7	rs1209002	91813878	C	G	0.458955	0.140591	0.025034	3.05657e-07	0.000187461	0.0019874	FALSE
Glu-UL	ENSG00000127914	AKAP9	7	rs7806157	91972616	A	G	0.365672	-0.0743324	0.0154905	7.80636e-06	0.00269969	0.0183523	FALSE
Glu-UL	ENSG00000127980	PEX1	7	rs78318725	92513403	A	T	0.0559702	0.220119	0.0373539	9.77289e-08	6.17237e-05	0.000770929	FALSE
Glu-UL	ENSG00000070669	ASNS	7	rs1808248	97881682	C	T	0.526119	0.143608	0.0213289	2.78392e-09	4.46179e-06	7.26308e-05	FALSE
Glu-UL	ENSG00000284707		7	rs11971168	97963894	T	C	0.261194	-0.074792	0.0160677	1.34831e-05	0.00790645	0.0429694	FALSE
Glu-UL	ENSG00000205356	TECPR1	7	rs17169486	98253024	A	T	0.208955	-0.104866	0.0179889	1.2707e-07	0.000130452	0.00146109	FALSE
Glu-UL	ENSG00000164713	BRI3	7	rs6951479	98258809	G	A	0.615672	0.118709	0.0188948	1.90509e-08	2.62849e-05	0.000355908	FALSE
Glu-UL	ENSG00000146833	TRIM4	7	rs503115	99861521	T	C	0.58209	-0.0931472	0.0203538	1.81024e-05	0.00473514	0.0285835	FALSE
Glu-UL	ENSG00000106261	ZKSCAN1	7	rs57966707	100172833	A	T	0.253731	0.107505	0.0202065	1.01068e-06	0.000407981	0.00384881	FALSE
Glu-UL	ENSG00000166529	ZSCAN21	7	rs2293481	100102003	T	C	0.634328	-0.15654	0.0252989	2.84578e-08	2.42563e-05	0.000330611	TRUE
Glu-UL	ENSG00000292277		7	rs1628077	100203335	G	A	0.283582	0.293052	0.0622842	1.11479e-05	0.00377939	0.0241137	FALSE
Glu-UL	ENSG00000121716	PILRB	7	rs3991544	100322965	G	A	0.160448	0.365126	0.0293722	5.38932e-20	5.82304e-15	6.23384e-13	FALSE
Glu-UL	ENSG00000085514	PILRA	7	rs6962151	100430861	T	C	0.190299	0.285877	0.0351721	6.26243e-12	3.63065e-08	9.92336e-07	FALSE
Glu-UL	ENSG00000077080	ACTL6B	7	rs1052897	100643148	A	T	0.835821	-0.111175	0.0192939	1.67764e-07	0.000113821	0.0013046	FALSE
Glu-UL	ENSG00000160963	COL26A1	7	rs6947185	101398477	C	A	0.593284	-0.190866	0.0344126	4.05955e-07	0.000531624	0.00477176	FALSE
Glu-UL	ENSG00000160991	ORAI2	7	rs12669274	102436115	G	A	0.485075	0.135481	0.0249748	6.64527e-07	0.000447804	0.00415327	FALSE
Glu-UL	ENSG00000161036	LRWD1	7	rs3800987	102472533	G	A	0.559702	-0.208893	0.0363071	1.73894e-07	0.000107485	0.00124444	TRUE
Glu-UL	ENSG00000228049	POLR2J2	7	rs17132619	102749819	G	A	0.873134	-1.00897	0.0932389	4.74569e-17	1.12259e-12	7.32118e-11	FALSE
Glu-UL	ENSG00000161040	FBXL13	7	rs35850434	103352638	C	T	0.231343	0.139718	0.0315624	3.15528e-05	0.00900562	0.0475877	FALSE
Glu-UL	ENSG00000289956		7	rs148300669	103226031	T	G	0.0559702	-0.42536	0.0560157	6.57911e-11	1.80013e-07	4.09514e-06	TRUE
Glu-UL	ENSG00000091127	PUS7	7	rs6969426	105506703	G	A	0.126866	0.145016	0.0265785	5.85366e-07	0.000674155	0.00580824	FALSE
Glu-UL	ENSG00000146776	ATXN7L1	7	rs375981	105989710	G	A	0.850746	0.0763711	0.015816	6.95518e-06	0.00744064	0.0408689	FALSE
Glu-UL	ENSG00000181016	LSMEM1	7	rs6966318	112452802	T	C	0.75	-0.237695	0.0485127	5.29207e-06	0.00324354	0.0212609	FALSE
Glu-UL	ENSG00000135269	TES	7	rs1319886	116210408	T	C	0.533582	0.448193	0.0424752	1.51396e-16	2.16366e-12	1.34307e-10	TRUE
Glu-UL	ENSG00000304750		7	rs6466648	118185243	C	G	0.641791	-0.416647	0.0442788	2.20035e-14	9.11891e-11	4.06768e-09	FALSE
Glu-UL	ENSG00000233417		7	rs6960301	120248700	G	A	0.164179	0.459635	0.0647896	5.831e-10	5.79922e-07	1.19753e-05	FALSE
Glu-UL	ENSG00000048405	ZNF800	7	rs6467121	127336075	C	A	0.61194	0.109552	0.0190656	1.79287e-07	0.000159459	0.00174058	FALSE
Glu-UL	ENSG00000295686		7	rs12536382	127588674	C	T	0.391791	0.220657	0.0332867	4.35288e-09	5.82852e-06	9.09493e-05	TRUE
Glu-UL	ENSG00000165055	METTL2B	7	rs1053124	128501811	T	C	0.794776	-0.110049	0.0197784	3.77715e-07	0.000310687	0.00306061	FALSE
Glu-UL	ENSG00000242588		7	rs10266462	128600166	A	G	0.593284	-0.0799021	0.013162	4.65276e-08	6.31083e-05	0.000787268	FALSE
Glu-UL	ENSG00000273329		7	rs62490955	129606638	T	C	0.514925	-0.194852	0.0295255	4.94033e-09	8.52989e-06	0.000129256	FALSE
Glu-UL	ENSG00000240571		7	rs4731661	130130054	G	C	0.813433	-0.245332	0.0526621	1.32914e-05	0.00804135	0.043496	FALSE
Glu-UL	ENSG00000306749		7	rs7780021	131556326	G	A	0.302239	-0.150482	0.0201381	1.11873e-10	2.64426e-07	5.8345e-06	TRUE
Glu-UL	ENSG00000128567	PODXL	7	rs11763366	131552109	T	G	0.212687	-0.125028	0.0232852	8.30146e-07	0.00091627	0.00751709	FALSE
Glu-UL	ENSG00000146856	AGBL3	7	rs58576150	135000996	T	C	0.328358	-0.217643	0.0261847	2.78199e-12	1.37969e-08	4.12078e-07	FALSE
Glu-UL	ENSG00000105875	WDR91	7	rs292598	135208272	C	A	0.652985	0.139925	0.0266745	1.36179e-06	0.00121793	0.00941251	FALSE
Glu-UL	ENSG00000243317	STMP1	7	rs71539420	135622041	T	G	0.141791	0.303839	0.0295465	4.83955e-16	7.36695e-12	3.97439e-10	FALSE
Glu-UL	ENSG00000225559		7	rs6969282	138161855	G	T	0.0634328	0.61748	0.11736	1.27871e-06	0.00136426	0.0104089	TRUE
Glu-UL	ENSG00000105929	ATP6V0A4	7	rs58805695	138799271	T	A	0.119403	-0.327889	0.0575401	2.18075e-07	0.00027387	0.00274516	FALSE
Glu-UL	ENSG00000295212		7	rs6965588	138817672	G	A	0.11194	-0.27417	0.0546954	3.41182e-06	0.00330982	0.0216266	FALSE
Glu-UL	ENSG00000146963	LUC7L2	7	rs11764236	139433768	C	T	0.291045	-0.0910554	0.017829	2.35588e-06	0.00198696	0.0142975	FALSE
Glu-UL	ENSG00000257335	MGAM	7	rs12533304	141735636	T	C	0.462687	-0.423576	0.0407705	3.05823e-16	4.21556e-12	2.44034e-10	FALSE
Glu-UL	ENSG00000306674		7	rs35167798	149283204	T	C	0.108209	-0.522708	0.0836448	2.19513e-08	2.97639e-05	0.000399862	FALSE
Glu-UL	ENSG00000106617	PRKAG2	7	rs2374296	151929045	A	G	0.541045	0.120793	0.0237626	2.58715e-06	0.00275345	0.0186782	FALSE
Glu-UL	ENSG00000286565		7	rs62492977	152923987	A	T	0.257463	-0.316779	0.0389271	5.998e-12	2.93968e-08	8.14278e-07	FALSE
Glu-UL	ENSG00000126870	DYNC2I1	7	rs13243795	158917732	T	C	0.108209	0.130173	0.0233926	3.76788e-07	0.000328681	0.00321329	TRUE
Glu-UL	ENSG00000298006		7	rs11765725	158945026	C	T	0.141791	-0.451176	0.0807986	3.48395e-07	0.000302403	0.00298471	TRUE
Glu-UL	ENSG00000106018	VIPR2	7	rs76844436	159121231	G	A	0.134328	0.618587	0.135596	1.91047e-05	0.00820524	0.0442432	FALSE
Glu-UL	ENSG00000292979		8	rs7822515	206504	G	A	0.279851	-0.215721	0.0282761	5.62956e-11	5.51526e-07	1.14347e-05	FALSE
Glu-UL	ENSG00000180190	TDRP	8	rs56207915	495155	A	C	0.320896	-0.15143	0.0195734	3.51157e-11	4.78432e-07	9.99975e-06	FALSE
Glu-UL	ENSG00000104714	ERICH1	8	rs4735900	657161	T	C	0.511194	0.214093	0.0165595	7.02507e-21	3.53898e-15	3.92112e-13	FALSE
Glu-UL	ENSG00000282142		8	rs7463885	2728156	C	T	0.380597	-0.5447	0.089153	3.9497e-08	0.000108947	0.00125854	TRUE
Glu-UL	ENSG00000253853		8	rs13251661	2753610	C	T	0.466418	0.312247	0.0593047	1.26001e-06	0.00228431	0.0160311	FALSE
Glu-UL	ENSG00000254319	LINC03021	8	rs11136540	2736167	G	A	0.294776	-0.352163	0.0700835	3.2524e-06	0.00517458	0.0306086	FALSE
Glu-UL	ENSG00000104626	ERI1	8	rs13272451	9028673	G	T	0.455224	0.156118	0.0217519	4.06433e-10	2.36938e-06	4.09641e-05	FALSE
Glu-UL	ENSG00000253641	LINC03022	8	rs4840487	10481744	T	C	0.567164	-0.208597	0.0360068	1.47589e-07	0.000377133	0.00360488	FALSE
Glu-UL	ENSG00000253678		8	rs3750314	10428300	T	C	0.0820896	-0.273083	0.0455365	6.33225e-08	0.000189109	0.00199859	FALSE
Glu-UL	ENSG00000184647	PRSS55	8	rs56017720	10489752	G	A	0.0858209	2.55484	0.155829	1.13756e-26	5.80528e-19	1.61673e-16	TRUE
Glu-UL	ENSG00000290829		8	rs58602899	11991324	G	T	0.492537	0.364971	0.0454639	9.74342e-12	8.33378e-08	2.06923e-06	FALSE
Glu-UL	ENSG00000255052	FAM66D	8	rs147574312	12027990	A	C	0.347015	0.378158	0.0740384	2.35168e-06	0.0023175	0.0162119	FALSE
Glu-UL	ENSG00000250305	TRMT9B	8	rs1401470	12949453	T	C	0.402985	-0.172454	0.0307437	3.14019e-07	0.000453588	0.00420313	FALSE
Glu-UL	ENSG00000078674	PCM1	8	rs478420	17935344	G	A	0.58209	-0.143129	0.0116018	7.95163e-20	5.39348e-14	4.48191e-12	TRUE
Glu-UL	ENSG00000104763	ASAH1	8	rs35058339	17857309	G	A	0.104478	-0.19958	0.0382331	1.50734e-06	0.00223516	0.0157751	FALSE
Glu-UL	ENSG00000147408	CSGALNACT1	8	rs28558562	19601814	G	C	0.220149	0.197394	0.0410706	7.58209e-06	0.00922043	0.0485161	FALSE
Glu-UL	ENSG00000253164		8	rs55638716	20350124	C	G	0.104478	1.58494	0.103072	4.87566e-25	6.55582e-19	1.73212e-16	TRUE
Glu-UL	ENSG00000301347		8	rs4922160	20350272	T	G	0.108209	1.1934	0.115207	3.49194e-16	1.49218e-11	7.64964e-10	FALSE
Glu-UL	ENSG00000305102		8	rs7826924	21690801	C	T	0.44403	-0.453806	0.0687344	4.88034e-09	1.22797e-05	0.00017999	FALSE
Glu-UL	ENSG00000158863	FHIP2B	8	rs11786352	22579628	G	A	0.182836	0.146025	0.0312491	1.25909e-05	0.00946551	0.0493348	TRUE
Glu-UL	ENSG00000197181	PIWIL2	8	rs2290274	22356861	C	T	0.395522	-0.250698	0.0530992	1.0482e-05	0.00943647	0.0492582	FALSE
Glu-UL	ENSG00000285669		8	rs12548744	30184400	A	G	0.134328	0.168814	0.0337951	3.65208e-06	0.00287578	0.0193932	FALSE
Glu-UL	ENSG00000172728	FUT10	8	rs4617116	33478557	G	C	0.649254	-0.224625	0.032714	1.56646e-09	1.51829e-06	2.77391e-05	FALSE
Glu-UL	ENSG00000253642		8	rs28666638	33547797	T	C	0.0634328	0.45692	0.0904543	2.93232e-06	0.00134108	0.0102438	TRUE
Glu-UL	ENSG00000168575	SLC20A2	8	rs6980507	42527944	A	G	0.593284	-0.0661808	0.0144538	1.79422e-05	0.00616363	0.0353038	FALSE
Glu-UL	ENSG00000164808	SPIDR	8	rs10095466	47237754	G	T	0.309702	-0.0684847	0.012673	7.22425e-07	0.000136843	0.00152274	FALSE
Glu-UL	ENSG00000034239	CLXN	8	rs3750259	48735351	C	A	0.503731	-0.245493	0.0462053	1.04048e-06	0.000472019	0.00434268	TRUE
Glu-UL	ENSG00000289095		8	rs13252195	49877321	G	C	0.529851	-0.720763	0.0691557	2.65085e-16	1.91769e-12	1.21229e-10	FALSE
Glu-UL	ENSG00000167904	TMEM68	8	rs113929937	55966461	G	A	0.0634328	-0.238254	0.0462924	2.01551e-06	0.00121793	0.00941251	FALSE
Glu-UL	ENSG00000181195	PENK	8	rs1508092	56867752	G	C	0.436567	0.437472	0.0612728	4.78446e-10	7.23483e-07	1.44476e-05	FALSE
Glu-UL	ENSG00000285971		8	rs10090129	62257040	G	T	0.570895	-0.332919	0.0334518	2.04493e-15	4.4733e-11	2.10474e-09	FALSE
Glu-UL	ENSG00000137563	GGH	8	rs10435606	62887403	C	T	0.19403	-0.236007	0.0499167	1.0218e-05	0.00439646	0.0270842	FALSE
Glu-UL	ENSG00000297397		8	rs10096876	63343715	T	C	0.324627	0.208228	0.0458547	2.06591e-05	0.00896711	0.0474329	FALSE
Glu-UL	ENSG00000178125	PPP1R42	8	rs7010038	67443221	T	C	0.190299	0.251553	0.0519279	6.55122e-06	0.00121855	0.00941251	FALSE
Glu-UL	ENSG00000221947	XKR9	8	rs34042354	70818726	A	G	0.492537	0.823094	0.0498854	7.79043e-27	2.73856e-21	1.07362e-18	FALSE
Glu-UL	ENSG00000285579		8	rs34042354	70818726	A	G	0.492537	0.843545	0.0476184	1.05769e-28	8.02841e-23	4.86627e-20	FALSE
Glu-UL	ENSG00000254288		8	rs4385459	74184756	A	G	0.496269	0.276502	0.0552429	3.51258e-06	0.0023563	0.0164155	FALSE
Glu-UL	ENSG00000254349	MIR2052HG	8	rs10088057	74464938	G	A	0.675373	-0.228825	0.0409704	3.46734e-07	0.000336418	0.00327514	TRUE
Glu-UL	ENSG00000296852		8	rs2919932	78739707	G	A	0.309702	-0.363356	0.0316131	2.7013e-18	7.35271e-14	5.92309e-12	FALSE
Glu-UL	ENSG00000309889		8	rs6983483	78944134	T	C	0.283582	0.265351	0.0533493	3.96902e-06	0.00245498	0.0169322	FALSE
Glu-UL	ENSG00000254689	LINC02235	8	rs80271524	81766040	C	T	0.108209	0.329749	0.0603898	5.75481e-07	0.000395691	0.00375096	FALSE
Glu-UL	ENSG00000104497	SNX16	8	rs6987463	81801787	G	C	0.365672	0.132299	0.0264406	3.53425e-06	0.00182332	0.0133239	FALSE
Glu-UL	ENSG00000253778		8	rs2304789	86554965	C	T	0.339552	0.50929	0.0553883	5.65693e-14	4.72866e-10	1.85948e-08	FALSE
Glu-UL	ENSG00000104312	RIPK2	8	rs43133	89758441	A	T	0.406716	-0.201473	0.0437373	1.61747e-05	0.00654617	0.0370821	TRUE
Glu-UL	ENSG00000251136	PARAIL	8	rs184302	89704396	C	T	0.630597	-0.169769	0.0269942	1.85363e-08	1.96841e-05	0.000274837	FALSE
Glu-UL	ENSG00000104320	NBN	8	rs10100369	90118455	A	C	0.61194	0.114067	0.0218572	1.51556e-06	0.000814476	0.00679559	FALSE
Glu-UL	ENSG00000155100	OTUD6B	8	rs13255452	90570760	A	G	0.399254	0.102713	0.0236207	4.20342e-05	0.00917243	0.0483699	FALSE
Glu-UL	ENSG00000214954	LRRC69	8	rs12334299	91245431	G	A	0.0671642	0.625058	0.109531	2.10829e-07	0.000108933	0.00125854	FALSE
Glu-UL	ENSG00000147606	SLC26A7	8	rs10108620	91231453	C	A	0.0634328	0.743249	0.137505	7.18762e-07	0.000371445	0.00356706	FALSE
Glu-UL	ENSG00000302563		8	rs2514712	100192424	A	G	0.373134	0.370881	0.0614288	5.34437e-08	6.12277e-05	0.000765662	FALSE
Glu-UL	ENSG00000176406	RIMS2	8	rs16870588	103625054	C	G	0.179104	-0.136441	0.0251302	6.52231e-07	0.000503201	0.00456837	FALSE
Glu-UL	ENSG00000285982		8	rs67785072	103691270	G	A	0.253731	-0.170423	0.0325542	1.42023e-06	0.000982503	0.00795283	FALSE
Glu-UL	ENSG00000253796		8	rs28407429	109181154	C	T	0.328358	-0.572183	0.0448454	1.40243e-20	1.22893e-15	1.54429e-13	FALSE
Glu-UL	ENSG00000174417	TRHR	8	rs12681212	108966934	G	A	0.570895	-0.254177	0.0504916	3.13818e-06	0.00153982	0.0115562	TRUE
Glu-UL	ENSG00000147679	UTP23	8	rs67676723	116761748	C	A	0.108209	0.189083	0.0340674	3.99639e-07	0.00028942	0.00287129	FALSE
Glu-UL	ENSG00000286282		8	rs2071518	119423572	C	T	0.328358	-0.281165	0.0528807	1.02442e-06	0.000624701	0.00542754	FALSE
Glu-UL	ENSG00000136982	DSCC1	8	rs7825443	119859462	A	G	0.19403	-0.523277	0.0497852	1.80879e-16	5.64697e-12	3.17966e-10	FALSE
Glu-UL	ENSG00000155792	DEPTOR	8	rs955372	119871503	A	G	0.287313	0.15392	0.0307195	3.44073e-06	0.00209118	0.0149018	FALSE
Glu-UL	ENSG00000305490		8	rs11780771	124725992	A	C	0.578358	-0.442566	0.0510369	5.68657e-13	2.97971e-09	1.0408e-07	FALSE
Glu-UL	ENSG00000249816	LINC00964	8	rs11780771	124725992	A	C	0.578358	-0.33553	0.0389637	7.41498e-13	3.68581e-09	1.26598e-07	FALSE
Glu-UL	ENSG00000167653	PSCA	8	rs4736369	142670280	T	C	0.473881	0.650839	0.0713248	7.69571e-14	4.15276e-10	1.64581e-08	TRUE
Glu-UL	ENSG00000305126		8	rs13439114	143024892	G	A	0.58209	-0.265266	0.0365897	2.96234e-10	1.17088e-06	2.23427e-05	FALSE
Glu-UL	ENSG00000185730	ZNF696	8	rs2235115	143296014	C	G	0.414179	0.323947	0.0280268	2.05594e-18	2.11339e-13	1.52286e-11	FALSE
Glu-UL	ENSG00000204839	MROH6	8	rs9657360	143594692	C	T	0.738806	0.581862	0.0642087	1.01557e-13	8.68534e-10	3.2309e-08	FALSE
Glu-UL	ENSG00000147813	NAPRT	8	rs9657360	143594692	C	T	0.738806	0.523544	0.0701712	1.17674e-10	3.47472e-07	7.56963e-06	FALSE
Glu-UL	ENSG00000254812		8	rs4873809	143611897	C	T	0.313433	-0.26583	0.0512725	1.73475e-06	0.00161485	0.0120056	FALSE
Glu-UL	ENSG00000183309	ZNF623	8	rs7003244	143643267	A	G	0.593284	-0.121454	0.0225667	7.89144e-07	0.00113512	0.00889191	FALSE
Glu-UL	ENSG00000203499	IQANK1	8	rs7829793	143766477	C	T	0.697761	-0.379535	0.0528981	4.10686e-10	1.12743e-06	2.16337e-05	FALSE
Glu-UL	ENSG00000180921	FAM83H	8	rs12156265	143766586	G	A	0.511194	-0.233102	0.0399209	1.2211e-07	0.00016164	0.00176065	FALSE
Glu-UL	ENSG00000178209	PLEC	8	rs7155	143915294	A	G	0.522388	-0.164762	0.0289924	2.32427e-07	0.000205044	0.00213417	FALSE
Glu-UL	ENSG00000179698	WDR97	8	rs13264654	144120626	T	C	0.134328	0.615564	0.073302	1.90492e-12	4.86409e-09	1.56627e-07	FALSE
Glu-UL	ENSG00000071894	CPSF1	8	rs2280837	144395081	C	G	0.503731	-0.279232	0.0299968	3.42887e-14	1.25125e-10	5.39464e-09	FALSE
Glu-UL	ENSG00000294503		8	rs13277467	144799822	C	G	0.343284	-0.273414	0.0538621	2.66051e-06	0.000755549	0.00639718	FALSE
Glu-UL	ENSG00000310152		8	rs2722497	144755962	G	C	0.559702	0.373628	0.0456542	4.89375e-12	1.1383e-08	3.44981e-07	TRUE
Glu-UL	ENSG00000196378	ZNF34	8	rs2722497	144755962	G	C	0.559702	0.266696	0.041385	9.58916e-09	5.7264e-06	9.01675e-05	TRUE
Glu-UL	ENSG00000172785	ZNG1A	9	rs3008143	193737	C	T	0.585821	-0.293008	0.0349406	2.00637e-12	1.44004e-08	4.26393e-07	FALSE
Glu-UL	ENSG00000107104	KANK1	9	rs10974745	480701	C	G	0.578358	-0.215136	0.0385606	3.55258e-07	0.000612461	0.00533921	FALSE
Glu-UL	ENSG00000306202		9	rs1324205	2248103	G	C	0.828358	-0.541864	0.063878	1.30803e-12	9.41016e-09	2.88585e-07	FALSE
Glu-UL	ENSG00000290482		9	rs12379447	3141953	T	A	0.492537	0.307772	0.0602156	2.31887e-06	0.00216928	0.0153522	FALSE
Glu-UL	ENSG00000287759		9	rs62540578	4741387	C	G	0.488806	-0.297603	0.0593243	3.36055e-06	0.00426791	0.0265051	TRUE
Glu-UL	ENSG00000107077	KDM4C	9	rs62566026	6674672	C	A	0.104478	0.142675	0.0264586	7.56926e-07	0.00101288	0.0081028	FALSE
Glu-UL	ENSG00000286474		9	rs10809464	11408193	T	A	0.447761	0.369762	0.073741	3.38965e-06	0.00259963	0.017787	FALSE
Glu-UL	ENSG00000175893	ZDHHC21	9	rs4397504	14661220	A	C	0.179104	-0.162834	0.0253506	1.04868e-08	3.01646e-05	0.000404718	FALSE
Glu-UL	ENSG00000164946	FREM1	9	rs10961820	14990761	G	C	0.570895	-0.252038	0.043358	1.36053e-07	0.000530895	0.00476937	FALSE
Glu-UL	ENSG00000215237		9	rs12336840	15047871	A	G	0.414179	0.389248	0.0541244	3.81525e-10	1.31245e-06	2.47235e-05	FALSE
Glu-UL	ENSG00000291185		9	rs12684174	15035306	T	C	0.429104	-0.246981	0.0352613	8.61805e-10	2.23917e-06	3.91067e-05	FALSE
Glu-UL	ENSG00000164989	CCDC171	9	rs35971661	15813624	A	G	0.414179	-0.132676	0.0229434	1.54129e-07	0.000187077	0.00198731	FALSE
Glu-UL	ENSG00000044459	CNTLN	9	rs12003380	17135436	G	C	0.455224	0.0833903	0.0174281	8.22886e-06	0.00681494	0.0383103	TRUE
Glu-UL	ENSG00000147872	PLIN2	9	rs10756985	18749434	G	C	0.541045	-0.187583	0.0330537	2.3999e-07	0.000440432	0.00409226	FALSE
Glu-UL	ENSG00000147894	C9orf72	9	rs2282240	27572636	C	T	0.223881	-0.228368	0.037431	4.09654e-08	6.60716e-05	0.00081829	TRUE
Glu-UL	ENSG00000307594		9	rs17769936	27697402	T	A	0.145522	0.727679	0.0950242	4.96196e-11	5.07247e-07	1.05379e-05	FALSE
Glu-UL	ENSG00000107201	RIGI	9	rs4442231	32410852	T	C	0.854478	-0.255607	0.0496968	2.04271e-06	0.00175413	0.0129337	FALSE
Glu-UL	ENSG00000137074	APTX	9	rs3818644	33025115	A	C	0.660448	-0.141681	0.019843	4.77734e-10	1.44179e-06	2.68169e-05	TRUE
Glu-UL	ENSG00000165271	NOL6	9	rs4120127	33525449	G	A	0.231343	0.232683	0.0380826	3.94557e-08	6.35174e-05	0.000791413	FALSE
Glu-UL	ENSG00000221829	FANCG	9	rs1566594	34839541	T	G	0.958955	-0.506636	0.103977	5.87513e-06	0.00234238	0.0163526	FALSE
Glu-UL	ENSG00000288586		9	rs6476519	36066388	A	G	0.0634328	-0.439901	0.0909996	6.81276e-06	0.00459981	0.0279632	FALSE
Glu-UL	ENSG00000277027	RMRP	9	rs1538536	35665801	T	G	0.123134	0.997689	0.213772	1.28732e-05	0.00766826	0.0419626	FALSE
Glu-UL	ENSG00000198467	TPM2	9	rs1985474	35725988	C	T	0.272388	-0.388361	0.0588549	4.95835e-09	8.08768e-06	0.000122916	FALSE
Glu-UL	ENSG00000122694	GLIPR2	9	rs112776904	36137056	A	G	0.0485075	0.546668	0.0843757	8.27064e-09	1.26402e-05	0.000184748	TRUE
Glu-UL	ENSG00000122705	CLTA	9	rs10814347	36174240	G	C	0.0820896	-0.132479	0.0274515	7.03016e-06	0.003976	0.025012	FALSE
Glu-UL	ENSG00000165275	TRMT10B	9	rs7047441	37844750	C	T	0.16791	-0.163065	0.0302329	7.53195e-07	0.000728644	0.00620506	FALSE
Glu-UL	ENSG00000119125	GDA	9	rs10869088	72057503	G	A	0.447761	-0.273769	0.0572578	8.33868e-06	0.00438336	0.0270462	FALSE
Glu-UL	ENSG00000106733	NMRK1	9	rs3824348	75123635	A	T	0.350746	-0.349746	0.0423899	3.64399e-12	1.38873e-08	4.13578e-07	FALSE
Glu-UL	ENSG00000197969	VPS13A	9	rs62573225	77313256	G	A	0.0559702	-0.227943	0.0446348	2.35852e-06	0.00224396	0.0158191	FALSE
Glu-UL	ENSG00000156049	GNA14	9	rs7019961	78038528	C	G	0.619403	0.191031	0.0293038	6.97191e-09	1.08324e-05	0.000161068	FALSE
Glu-UL	ENSG00000308288		9	rs7038041	78327196	C	T	0.33209	0.184902	0.0298272	2.71147e-08	3.37366e-05	0.000446252	FALSE
Glu-UL	ENSG00000308267		9	rs4378035	78330400	A	C	0.358209	0.247848	0.0455396	6.18536e-07	0.000644495	0.0055901	FALSE
Glu-UL	ENSG00000309620		9	rs76358659	89306540	C	A	0.0746269	-0.289092	0.0485072	7.39619e-08	0.000102376	0.00120012	FALSE
Glu-UL	ENSG00000285907		9	rs3138499	89605006	A	C	0.458955	-0.671538	0.0575453	1.28619e-18	2.42348e-14	2.17149e-12	TRUE
Glu-UL	ENSG00000188312	CENPP	9	rs7860297	92325922	A	G	0.208955	0.417649	0.0214543	2.92866e-31	1.67195e-24	1.23058e-21	TRUE
Glu-UL	ENSG00000127081	ZNF484	9	rs11790332	92826690	T	C	0.19403	-0.220014	0.0370716	8.20609e-08	9.97049e-05	0.00117281	FALSE
Glu-UL	ENSG00000127084	FGD3	9	rs12353227	92968603	C	T	0.541045	-0.130096	0.0272013	8.29462e-06	0.0059968	0.0345402	FALSE
Glu-UL	ENSG00000290685		9	rs2995998	93332564	T	C	0.597015	0.234629	0.0293502	1.12982e-11	5.44714e-08	1.42821e-06	FALSE
Glu-UL	ENSG00000188938	FAM120AOS	9	rs55846141	93427679	G	A	0.104478	0.22085	0.0421446	1.3911e-06	0.00266394	0.0181547	FALSE
Glu-UL	ENSG00000148120	AOPEP	9	rs12339942	94659375	G	A	0.119403	-0.0935247	0.0204075	1.7671e-05	0.00764816	0.0418748	FALSE
Glu-UL	ENSG00000224848		9	rs10978594	96687008	C	T	0.119403	-0.8614	0.055898	4.30378e-25	1.18766e-19	3.82434e-17	TRUE
Glu-UL	ENSG00000136943	CTSV	9	rs34382632	97238797	C	G	0.440298	0.470171	0.04487	2.07874e-16	4.64449e-12	2.67363e-10	TRUE
Glu-UL	ENSG00000203279		9	rs3747496	97325063	A	G	0.485075	-0.631748	0.0433428	1.03001e-23	1.55049e-18	3.89675e-16	FALSE
Glu-UL	ENSG00000197816	CCDC180	9	rs74580438	97219561	G	A	0.518657	0.141026	0.0279242	2.94482e-06	0.00120322	0.00933608	FALSE
Glu-UL	ENSG00000236130	PTCSC2	9	rs12238579	97889776	G	C	0.402985	-0.226434	0.0427676	1.1206e-06	0.00102898	0.00821923	FALSE
Glu-UL	ENSG00000136932	TRMO	9	rs10119760	97862320	G	C	0.690298	-0.261642	0.0366328	4.73214e-10	1.73536e-06	3.1056e-05	FALSE
Glu-UL	ENSG00000095383	TBC1D2	9	rs10985720	98277336	A	G	0.208955	0.258375	0.0424815	4.43607e-08	7.49263e-05	0.000911521	FALSE
Glu-UL	ENSG00000165138	ANKS6	9	rs337581	98739385	C	T	0.746269	-0.103543	0.0210293	4.8211e-06	0.00515825	0.0305646	FALSE
Glu-UL	ENSG00000119509	INVS	9	rs1055187	99971016	T	C	0.328358	0.0994334	0.017173	1.4953e-07	8.82666e-05	0.00105635	FALSE
Glu-UL	ENSG00000136824	SMC2	9	rs10820616	104183710	G	A	0.649254	-0.150826	0.0274866	5.16082e-07	0.00048675	0.00445039	FALSE
Glu-UL	ENSG00000165029	ABCA1	9	rs2246293	104928557	C	G	0.429104	0.149473	0.0278023	8.07589e-07	0.00091784	0.00752398	TRUE
[truncated: 31 more rows]

## Sheet: Glu-DL
cell_type	ensembl_id	symbol	CHROM	SNP	POS	REF	ALT	AF	slope	slope_se	pval_nominal	pval_beta	qval	In_Peak
Glu-DL	ENSG00000272438		1	rs4970383	903175	C	A	0.261194	-0.448085	0.0662246	1.52748e-09	3.34873e-06	9.86472e-05	FALSE
Glu-DL	ENSG00000162585	FAAP20	1	rs2460002	2188394	A	G	0.708955	0.179174	0.0283781	1.14996e-08	1.73117e-05	0.000421865	FALSE
Glu-DL	ENSG00000142606	MMEL1	1	rs10797437	2607567	T	C	0.373134	0.441008	0.0819325	6.26726e-07	0.000701061	0.0101514	FALSE
Glu-DL	ENSG00000116198	CEP104	1	rs7534819	3844106	C	G	0.276119	-0.0966543	0.0191809	2.55725e-06	0.00371765	0.038894	FALSE
Glu-DL	ENSG00000130939	UBE4B	1	rs35316894	10143930	T	C	0.190299	-0.116204	0.0218608	8.27042e-07	0.000383083	0.00605132	FALSE
Glu-DL	ENSG00000177000	MTHFR	1	rs12569355	11863680	A	G	0.134328	0.184056	0.036595	2.65765e-06	0.00296163	0.0330003	FALSE
Glu-DL	ENSG00000037637	FBXO42	1	rs4661727	16242118	T	C	0.399254	-0.0900879	0.0171405	1.05814e-06	0.000952681	0.0130389	FALSE
Glu-DL	ENSG00000233421	LINC01783	1	rs1810999	16513981	A	G	0.537313	-0.351749	0.0710445	3.64021e-06	0.00170114	0.0211136	TRUE
Glu-DL	ENSG00000058453	CROCC	1	rs55779591	16980453	C	T	0.339552	0.214088	0.0377761	1.89523e-07	0.000112703	0.00212126	TRUE
Glu-DL	ENSG00000142794	NBPF3	1	rs10737456	21449628	G	A	0.511194	-0.209471	0.0406694	1.62764e-06	0.00248091	0.0286282	FALSE
Glu-DL	ENSG00000088280	ASAP3	1	rs61133598	23500985	A	C	0.175373	-0.310591	0.055342	2.39337e-07	0.000158785	0.00283716	FALSE
Glu-DL	ENSG00000001460	STPG1	1	rs2477303	24385859	T	A	0.227612	-0.525909	0.0620121	5.60738e-13	3.11592e-09	1.83128e-07	TRUE
Glu-DL	ENSG00000270605		1	rs9508	28237768	A	G	0.335821	-0.769295	0.0640152	4.23901e-20	1.57841e-15	3.00385e-13	FALSE
Glu-DL	ENSG00000204138	PHACTR4	1	rs2795321	28539198	A	G	0.36194	-0.0808506	0.0133778	3.75785e-08	4.30124e-05	0.000929179	FALSE
Glu-DL	ENSG00000168528	SERINC2	1	rs34278290	31410942	A	G	0.0783582	-0.329772	0.0664106	3.4346e-06	0.00162773	0.0203499	FALSE
Glu-DL	ENSG00000184389	A3GALT2	1	rs11554674	33324895	G	A	0.205224	0.600633	0.0798823	4.91843e-11	1.03387e-07	4.45881e-06	FALSE
Glu-DL	ENSG00000196182	STK40	1	rs72661613	35899180	A	G	0.0559702	-0.221219	0.0457826	5.84428e-06	0.00253197	0.0289941	FALSE
Glu-DL	ENSG00000134697	GNL2	1	rs2019918	37526058	C	T	0.406716	-0.140287	0.0278261	2.53188e-06	0.00194396	0.0235662	FALSE
Glu-DL	ENSG00000049089	COL9A2	1	rs115504008	40315505	A	C	0.257463	-0.666669	0.0788009	6.17425e-13	3.17079e-09	1.85444e-07	TRUE
Glu-DL	ENSG00000126091	ST3GAL3	1	rs4660257	43682497	T	C	0.279851	-0.106327	0.020646	1.63167e-06	0.00119661	0.0157483	FALSE
Glu-DL	ENSG00000243725	TTC4	1	rs12094622	54724125	G	T	0.0783582	0.616492	0.0798532	1.93911e-11	2.62758e-07	1.01297e-05	FALSE
Glu-DL	ENSG00000088035	ALG6	1	rs855301	63608409	C	T	0.738806	0.234911	0.0331435	3.55591e-10	1.04925e-06	3.42776e-05	FALSE
Glu-DL	ENSG00000300414		1	rs11208231	63507457	T	G	0.16791	-0.579399	0.0793567	1.33944e-10	4.22211e-07	1.54331e-05	TRUE
Glu-DL	ENSG00000142856	ITGB3BP	1	rs3009573	63438623	T	C	0.731343	-0.357453	0.0310444	4.16114e-19	1.0476e-14	1.72057e-12	FALSE
Glu-DL	ENSG00000118473	SGIP1	1	rs74435663	66533081	T	C	0.175373	0.121322	0.0192916	1.2837e-08	2.26702e-05	0.000531905	TRUE
Glu-DL	ENSG00000162595	DIRAS3	1	rs4926348	68504668	T	A	0.0895522	0.604384	0.113077	7.32707e-07	0.000596171	0.00885718	FALSE
Glu-DL	ENSG00000162620	LRRIQ3	1	rs532221	74236266	T	A	0.335821	-0.479179	0.0695741	8.83694e-10	1.33917e-06	4.28155e-05	FALSE
Glu-DL	ENSG00000254685	FPGT	1	rs1483793	74069446	A	G	0.477612	-0.237926	0.0358126	2.64946e-09	3.6625e-06	0.000106323	FALSE
Glu-DL	ENSG00000116783	TNNI3K	1	rs11210398	74015012	C	T	0.380597	0.200475	0.0242123	1.4343e-12	4.66716e-09	2.65197e-07	FALSE
Glu-DL	ENSG00000137960	GIPC2	1	rs1166710	77868944	T	A	0.227612	0.178766	0.0301238	6.03554e-08	4.33608e-05	0.000933342	FALSE
Glu-DL	ENSG00000122417	ODF2L	1	rs272491	86349005	C	T	0.302239	0.111993	0.0210941	8.49198e-07	0.000658453	0.00961569	FALSE
Glu-DL	ENSG00000307222		1	rs7547777	88995231	G	A	0.197761	-0.415921	0.0653778	9.30056e-09	2.79515e-05	0.000634703	FALSE
Glu-DL	ENSG00000162669	HFM1	1	rs281934	91348808	C	T	0.679105	-0.2171	0.0426069	2.03651e-06	0.0018536	0.0226772	FALSE
Glu-DL	ENSG00000097046	CDC7	1	rs12717798	91499389	T	C	0.36194	-0.290511	0.0365381	6.64773e-12	9.32371e-07	3.10517e-05	FALSE
Glu-DL	ENSG00000134201	GSTM5	1	rs929166	109712552	T	G	0.216418	-0.474484	0.0934919	2.21086e-06	0.00186161	0.0227288	TRUE
Glu-DL	ENSG00000163393	SLC22A15	1	rs2452551	115977336	C	T	0.328358	0.215625	0.0269701	5.41611e-12	3.63824e-08	1.75182e-06	TRUE
Glu-DL	ENSG00000131778	CHD1L	1	rs1890041	147242631	G	C	0.485075	-0.298281	0.0321502	1.33816e-14	1.85656e-10	1.45485e-08	TRUE
Glu-DL	ENSG00000285184		1	rs12022725	150028207	G	A	0.406716	-0.153343	0.0339202	1.9566e-05	0.00307016	0.0336467	FALSE
Glu-DL	ENSG00000310475		1	rs66773125	150202091	G	A	0.175373	0.414481	0.0811156	1.92155e-06	0.000528689	0.00800338	FALSE
Glu-DL	ENSG00000236427	CCDST	1	rs11588970	152202679	G	A	0.156716	-0.861916	0.106798	3.80894e-12	1.39382e-08	7.26568e-07	FALSE
Glu-DL	ENSG00000143294	PRCC	1	rs56163041	157047267	G	C	0.220149	-0.153513	0.0253829	3.68903e-08	7.24214e-05	0.00143358	FALSE
Glu-DL	ENSG00000132694	ARHGEF11	1	rs56163041	157047267	G	C	0.220149	-0.0726571	0.0145297	2.9856e-06	0.00277249	0.0313153	FALSE
Glu-DL	ENSG00000228560		1	rs10908714	159370563	T	A	0.477612	-0.455489	0.0760033	4.6825e-08	5.88345e-05	0.00120374	FALSE
Glu-DL	ENSG00000272668		1	rs34413912	159856858	C	T	0.33209	0.794105	0.0738853	1.40879e-17	2.9411e-13	3.87496e-11	FALSE
Glu-DL	ENSG00000272668		1	rs34413912	159856858	C	T	0.33209	0.794105	0.0738853	1.40879e-17	2.9411e-13	3.87496e-11	FALSE
Glu-DL	ENSG00000122218	COPA	1	rs1320569	159942539	C	G	0.951493	-0.24636	0.0505473	4.951e-06	0.00425392	0.0433691	FALSE
Glu-DL	ENSG00000270149		1	rs4656975	161014318	C	G	0.58209	-0.415146	0.0474557	1.60336e-13	9.10282e-10	5.93139e-08	FALSE
Glu-DL	ENSG00000283360		1	rs2165090	161487847	C	A	0.600746	0.332229	0.0690503	6.33713e-06	0.00339588	0.0364174	FALSE
Glu-DL	ENSG00000143147	GPR161	1	rs2902569	168148628	A	G	0.257463	-0.102458	0.0196002	1.18931e-06	0.00176476	0.0217904	FALSE
Glu-DL	ENSG00000143156	NME7	1	rs4529780	169336230	A	G	0.541045	-0.156728	0.0196634	6.06782e-12	4.87177e-08	2.2552e-06	FALSE
Glu-DL	ENSG00000116132	PRRX1	1	rs79334762	170672855	G	C	0.108209	1.46227	0.174134	8.28247e-13	2.3327e-08	1.1702e-06	FALSE
Glu-DL	ENSG00000162753	SLC9C2	1	rs61826814	173725120	T	G	0.0970149	0.505474	0.0624963	3.51018e-12	1.12679e-08	6.05811e-07	FALSE
Glu-DL	ENSG00000183831	ANKRD45	1	rs61826814	173725120	T	G	0.0970149	0.359035	0.0448743	5.2684e-12	1.69269e-08	8.5993e-07	FALSE
Glu-DL	ENSG00000296616		1	rs10912676	173740477	T	G	0.421642	0.488822	0.0689092	3.45963e-10	3.86373e-07	1.42098e-05	FALSE
Glu-DL	ENSG00000301599		1	rs566842	175881588	A	G	0.58209	0.3257	0.0549917	6.34802e-08	5.38456e-05	0.00111499	TRUE
Glu-DL	ENSG00000240021	TEX35	1	rs4650991	178542030	C	T	0.354478	0.258449	0.0482066	6.84646e-07	0.000507493	0.00772151	TRUE
Glu-DL	ENSG00000273384		1	rs6682815	178531974	T	C	0.38806	0.317261	0.0561938	2.07584e-07	0.000169851	0.00299914	TRUE
Glu-DL	ENSG00000116191	RALGPS2	1	rs4650998	178562715	G	A	0.507463	0.0854193	0.0181314	9.38837e-06	0.00422969	0.0431955	FALSE
Glu-DL	ENSG00000162782	TDRD5	1	rs1999068	179591583	T	C	0.272388	0.835401	0.0864845	2.23667e-15	6.52753e-11	5.71251e-09	TRUE
Glu-DL	ENSG00000143340	FAM163A	1	rs2504033	179733884	G	T	0.298507	0.857812	0.100744	4.78137e-13	7.89516e-09	4.40272e-07	TRUE
Glu-DL	ENSG00000198216	CACNA1E	1	rs10910908	181265873	A	G	0.455224	0.0910709	0.0173169	1.04421e-06	0.00105832	0.0141457	FALSE
Glu-DL	ENSG00000118197	DDX59	1	rs12140579	200655368	T	C	0.402985	-0.226262	0.0466978	5.54487e-06	0.00416136	0.0426795	FALSE
Glu-DL	ENSG00000143858	SYT2	1	rs6672257	202725099	G	C	0.787313	0.370073	0.0669543	3.42423e-07	0.000333224	0.00539888	FALSE
Glu-DL	ENSG00000058668	ATP2B4	1	rs28463360	203492255	C	G	0.455224	-0.219982	0.0293593	5.55006e-11	1.90649e-07	7.72222e-06	TRUE
Glu-DL	ENSG00000117335	CD46	1	rs7550273	207738834	G	C	0.36194	-0.145564	0.0211438	8.95092e-10	2.38395e-06	7.14554e-05	FALSE
Glu-DL	ENSG00000226251	LINC02608	1	rs11590672	212381921	C	G	0.223881	0.410315	0.0613285	2.14745e-09	4.01056e-06	0.000114993	FALSE
Glu-DL	ENSG00000234915		1	rs6659594	212357921	C	T	0.36194	0.327606	0.0619573	9.28435e-07	0.00101515	0.0136945	FALSE
Glu-DL	ENSG00000123685	BATF3	1	rs1995689	212696505	A	G	0.130597	0.656443	0.101872	6.46436e-09	9.81884e-06	0.000256476	FALSE
Glu-DL	ENSG00000143494	VASH2	1	rs6691872	213038108	C	A	0.529851	-0.193736	0.0237499	2.54136e-12	1.65672e-08	8.52495e-07	FALSE
Glu-DL	ENSG00000302746		1	rs10779608	213789719	C	T	0.11194	0.458313	0.0792016	1.13939e-07	0.000427395	0.00662901	FALSE
Glu-DL	ENSG00000196660	SLC30A10	1	rs2231734	219916010	A	C	0.358209	0.277053	0.0378031	1.17976e-10	9.92065e-07	3.27512e-05	FALSE
Glu-DL	ENSG00000286231		1	rs7514450	220817829	C	T	0.369403	0.337236	0.0653265	1.55179e-06	0.000884609	0.0123346	FALSE
Glu-DL	ENSG00000143819	EPHX1	1	rs111689693	225796826	C	G	0.197761	0.211525	0.0436585	5.55049e-06	0.00508255	0.0495422	FALSE
Glu-DL	ENSG00000243709	LEFTY1	1	rs80097623	225919635	C	T	0.0858209	-0.619756	0.091534	1.49594e-09	3.04453e-06	9.08015e-05	FALSE
Glu-DL	ENSG00000203685	STUM	1	rs2099380	226466551	G	A	0.100746	-0.244581	0.0398474	2.4907e-08	4.40649e-05	0.000946798	TRUE
Glu-DL	ENSG00000143801	PSEN2	1	rs2855562	226894149	G	A	0.563433	-0.276779	0.0287725	2.69709e-15	7.7078e-10	5.16269e-08	FALSE
Glu-DL	ENSG00000288674		1	rs2246221	226887701	G	A	0.541045	-0.373566	0.0508353	1.07776e-10	4.49699e-07	1.62399e-05	FALSE
Glu-DL	ENSG00000236975	LINC02814	1	rs241289	228788588	G	A	0.544776	-0.32132	0.0669608	6.66405e-06	0.00500634	0.0490039	FALSE
Glu-DL	ENSG00000116906	GNPAT	1	rs532163	231280655	A	G	0.466418	0.150172	0.0244296	2.39247e-08	3.90812e-05	0.000855039	FALSE
Glu-DL	ENSG00000285053		1	rs12730441	235334744	G	T	0.298507	-0.277265	0.0408245	1.36177e-09	4.15121e-05	0.000898388	FALSE
Glu-DL	ENSG00000162885	B3GALNT2	1	rs704720	235503886	A	G	0.462687	-0.114109	0.0232359	4.27385e-06	0.00329947	0.0356385	TRUE
Glu-DL	ENSG00000302268		1	rs2282369	236891499	A	G	0.634328	-0.409561	0.0717273	1.58074e-07	0.000240659	0.00409853	FALSE
Glu-DL	ENSG00000230015		1	rs3011431	240856745	T	C	0.817164	0.319577	0.0541885	7.07702e-08	0.000154097	0.00276163	FALSE
Glu-DL	ENSG00000179397	CATSPERE	1	rs3006017	244485680	A	G	0.522388	0.252459	0.0491628	1.73324e-06	0.00219814	0.0259152	FALSE
Glu-DL	ENSG00000203666	EFCAB2	1	rs76536940	244974779	C	T	0.123134	0.280173	0.0388602	2.03611e-10	5.20524e-07	1.84094e-05	FALSE
Glu-DL	ENSG00000162852	CNST	1	rs148817987	246634783	A	C	0.100746	0.159278	0.0292919	4.98387e-07	0.00152168	0.0193673	FALSE
Glu-DL	ENSG00000197472	ZNF695	1	rs61852625	247029123	G	A	0.0708955	-0.472568	0.0808339	8.82768e-08	0.000568497	0.00851994	FALSE
Glu-DL	ENSG00000305271		1	rs4542247	247165067	T	C	0.182836	-0.470811	0.0552959	4.79036e-13	4.383e-09	2.50237e-07	FALSE
Glu-DL	ENSG00000196418	ZNF124	1	rs12120049	247120966	T	C	0.242537	-0.18137	0.0250046	1.6669e-10	6.50263e-07	2.22751e-05	TRUE
Glu-DL	ENSG00000235749		1	rs28535274	247645251	A	T	0.432836	0.398943	0.0667417	5.00995e-08	0.000117719	0.00220529	FALSE
Glu-DL	ENSG00000203663	OR2L2	1	rs6664332	247965627	G	A	0.365672	0.597515	0.113003	9.28404e-07	0.000733106	0.0105012	FALSE
Glu-DL	ENSG00000304836		10	rs76557208	4824555	C	T	0.0746269	-0.4949	0.100265	3.86818e-06	0.00440723	0.0446198	FALSE
Glu-DL	ENSG00000108021	TASOR2	10	rs11259192	5684858	G	A	0.0970149	0.198711	0.0349576	1.76293e-07	0.000346178	0.00555024	TRUE
Glu-DL	ENSG00000226647		10	rs186963505	6051564	G	A	0.0634328	-0.566357	0.109578	1.51285e-06	0.00219825	0.0259152	FALSE
Glu-DL	ENSG00000148468	FAM171A1	10	rs11259580	15255143	T	C	0.242537	0.101371	0.0165106	2.47105e-08	0.00016483	0.00293208	TRUE
Glu-DL	ENSG00000148484	RSU1	10	rs7916048	16815184	T	C	0.574627	0.201827	0.0225162	5.83636e-14	8.0517e-10	5.36307e-08	FALSE
Glu-DL	ENSG00000107611	CUBN	10	rs3758418	17203639	G	C	0.369403	0.198263	0.0401278	3.79342e-06	0.00420854	0.0430162	FALSE
Glu-DL	ENSG00000204740	MALRD1	10	rs1332926	19487707	G	A	0.615672	-0.487936	0.0760091	7.20396e-09	1.58766e-05	0.000391671	FALSE
Glu-DL	ENSG00000307047		10	rs7913679	24301637	T	C	0.0746269	0.489341	0.0930833	1.053e-06	0.00153396	0.0194617	FALSE
Glu-DL	ENSG00000262412		10	rs12217860	27214889	C	T	0.615672	0.77068	0.0546926	4.60737e-24	1.38903e-18	4.89814e-16	FALSE
Glu-DL	ENSG00000301548		10	rs2780681	27223838	A	G	0.645522	0.425416	0.0703585	3.71323e-08	3.61801e-05	0.00080181	FALSE
Glu-DL	ENSG00000237128	LINC02652	10	rs61848475	28532515	G	A	0.253731	0.828234	0.0923931	5.81974e-14	3.03028e-10	2.2566e-08	TRUE
Glu-DL	ENSG00000197321	SVIL	10	rs34535212	29742568	G	A	0.216418	0.13506	0.0267146	2.39203e-06	0.00246032	0.0284454	FALSE
Glu-DL	ENSG00000216937	CCDC7	10	rs11009083	32784508	A	G	0.768657	-0.259096	0.0218769	9.31489e-20	1.2346e-14	1.97362e-12	FALSE
Glu-DL	ENSG00000287278		10	rs10827236	33324224	A	G	0.0970149	0.516193	0.0983034	1.07933e-06	0.00156098	0.0197418	FALSE
Glu-DL	ENSG00000148498	PARD3	10	rs10732429	34736645	A	T	0.645522	-0.214127	0.040238	8.07218e-07	0.00034426	0.00553282	FALSE
Glu-DL	ENSG00000189180	ZNF33A	10	rs1779053	37777664	T	A	0.0932836	-0.168653	0.0296217	1.6951e-07	6.49443e-05	0.00130655	FALSE
Glu-DL	ENSG00000290439	HSD17B7P2	10	rs2997792	38293965	G	A	0.533582	0.267452	0.0575194	1.19152e-05	0.00104983	0.0140793	FALSE
Glu-DL	ENSG00000215146		10	rs2505789	42461554	G	A	0.36194	0.751246	0.0703043	1.87833e-17	4.00172e-13	5.05035e-11	FALSE
Glu-DL	ENSG00000291065		10	rs2505811	42377385	G	C	0.365672	1.30206	0.104385	5.46133e-21	4.19544e-16	8.82473e-14	FALSE
Glu-DL	ENSG00000185904	LINC00839	10	rs2505811	42377385	G	C	0.365672	0.84866	0.112198	3.99632e-11	7.48044e-08	3.30946e-06	FALSE
Glu-DL	ENSG00000169826	CSGALNACT2	10	rs2503852	43209690	A	C	0.764925	-0.0965313	0.0189335	2.01189e-06	0.0020751	0.0249291	FALSE
Glu-DL	ENSG00000234504		10	rs117957541	44959607	G	C	0.104478	-0.522683	0.0849698	2.34837e-08	3.71302e-05	0.000819835	TRUE
Glu-DL	ENSG00000188234	AGAP4	10	rs4949013	45640858	C	A	0.682836	-0.159067	0.0358671	2.70934e-05	0.00370852	0.0388889	FALSE
Glu-DL	ENSG00000289143		10	rs769008	48182265	G	A	0.559702	0.405163	0.0679678	5.37687e-08	3.96078e-05	0.000863408	TRUE
Glu-DL	ENSG00000228566		10	rs60054940	63921356	G	A	0.134328	-0.353421	0.0769557	1.48602e-05	0.00438008	0.0444663	TRUE
Glu-DL	ENSG00000228566		10	rs60054940	63921356	G	A	0.134328	-0.353421	0.0769557	1.48602e-05	0.00438008	0.0444663	TRUE
Glu-DL	ENSG00000165730	STOX1	10	rs35879464	68848856	G	A	0.11194	0.464605	0.0759216	2.69938e-08	6.0359e-05	0.00122864	TRUE
Glu-DL	ENSG00000213551	DNAJC9	10	rs7086358	73240467	C	T	0.0970149	-0.206512	0.0448623	1.42591e-05	0.00154393	0.0195674	FALSE
Glu-DL	ENSG00000148600	CDHR1	10	rs7916271	84194464	C	T	0.533582	0.400489	0.0701508	1.58747e-07	0.000190377	0.0033176	TRUE
Glu-DL	ENSG00000272631		10	rs58334200	86753161	C	T	0.19403	-0.350101	0.0641498	4.58546e-07	0.000481938	0.00738896	FALSE
Glu-DL	ENSG00000107798	LIPA	10	rs304412	89427876	A	T	0.216418	-0.335839	0.0351065	3.46098e-15	8.82802e-11	7.45373e-09	FALSE
Glu-DL	ENSG00000138182	KIF20B	10	rs10881652	89744769	G	T	0.294776	-0.179448	0.0341883	1.08918e-06	0.000751689	0.0107417	FALSE
Glu-DL	ENSG00000165338	HECTD2	10	rs7911332	91394251	A	G	0.0559702	0.206144	0.0436238	8.87673e-06	0.00481138	0.0477136	FALSE
Glu-DL	ENSG00000138160	KIF11	10	rs12358677	92525050	C	G	0.208955	0.602707	0.0616202	1.2672e-15	2.12427e-11	2.02133e-09	FALSE
Glu-DL	ENSG00000077147	TM9SF3	10	rs12784975	96620380	T	C	0.175373	-0.164564	0.0311533	9.4864e-07	0.00100309	0.0136046	FALSE
Glu-DL	ENSG00000155265	GOLGA7B	10	rs11815020	97833686	T	C	0.108209	-0.217078	0.0424398	1.8813e-06	0.00156313	0.0197442	FALSE
Glu-DL	ENSG00000285932		10	rs3740078	99685834	A	C	0.309702	0.323391	0.0494605	4.24307e-09	2.21478e-05	0.00052097	TRUE
Glu-DL	ENSG00000075826	SEC31B	10	rs74210981	100527763	C	T	0.186567	-0.173048	0.0342687	2.44974e-06	0.00184802	0.022632	FALSE
Glu-DL	ENSG00000186862	PDZD7	10	rs11597056	101032154	C	A	0.152985	0.701149	0.0818831	3.81899e-13	2.22548e-09	1.33411e-07	TRUE
Glu-DL	ENSG00000138107	ACTR1A	10	rs12767131	102508869	T	C	0.279851	0.163177	0.031799	1.75915e-06	0.000921159	0.0127091	FALSE
Glu-DL	ENSG00000107957	SH3PXD2A	10	rs7901849	103924852	T	C	0.447761	-0.0746237	0.0135366	3.63932e-07	0.000326273	0.00531499	FALSE
Glu-DL	ENSG00000065621	GSTO2	10	rs568526	104273681	T	C	0.365672	-0.422473	0.0663895	9.22851e-09	1.51695e-05	0.000378115	FALSE
Glu-DL	ENSG00000119950	MXI1	10	rs1977830	110215282	T	C	0.276119	0.22851	0.0251606	3.34931e-14	2.04611e-10	1.57254e-08	FALSE
Glu-DL	ENSG00000203867	RBM20	10	rs71481106	110738678	G	A	0.130597	0.639974	0.116446	3.90604e-07	0.000414175	0.00645737	FALSE
Glu-DL	ENSG00000187164	SHTN1	10	rs7901788	117004075	T	C	0.268657	-0.125759	0.0175155	2.3342e-10	3.84855e-07	1.41975e-05	FALSE
Glu-DL	ENSG00000229272	LINC03036	10	rs690870	118994421	C	A	0.313433	-0.266467	0.0508282	1.11776e-06	0.00189065	0.023013	FALSE
Glu-DL	ENSG00000295480		10	rs196195	119764630	G	A	0.406716	1.82943	0.0856174	3.7303e-36	1.36505e-29	5.4554e-26	FALSE
Glu-DL	ENSG00000120008	WDR11	10	rs10886787	120856141	A	G	0.376866	-0.192996	0.0220462	1.55823e-13	1.39647e-09	8.72027e-08	FALSE
Glu-DL	ENSG00000293468		10	rs10887024	121928637	A	T	0.302239	-1.1517	0.0698173	2.24861e-28	1.26581e-20	6.89834e-18	TRUE
Glu-DL	ENSG00000308000		10	rs7069734	123981191	A	T	0.660448	-0.395359	0.0687179	1.31373e-07	0.000308933	0.00507388	FALSE
Glu-DL	ENSG00000188385	JAKMIP3	10	rs11592585	132141923	A	G	0.33209	0.116335	0.0237364	4.44282e-06	0.00495873	0.0487714	FALSE
Glu-DL	ENSG00000171811	CFAP46	10	rs11597534	132917575	G	A	0.432836	0.300105	0.0479127	1.43498e-08	1.96428e-05	0.000470071	FALSE
Glu-DL	ENSG00000130640	TUBGCP2	10	rs34466598	133318548	A	C	0.0634328	0.230531	0.0433685	8.27088e-07	0.000628945	0.00925622	TRUE
Glu-DL	ENSG00000214279	SCART1	10	rs10857716	133442823	C	T	0.320896	-0.356366	0.0616471	1.16861e-07	0.000140712	0.00256234	FALSE
Glu-DL	ENSG00000288107		10	rs10857716	133442823	C	T	0.320896	-0.504656	0.08181	2.17759e-08	2.63637e-05	0.000602068	FALSE
Glu-DL	ENSG00000177951	BET1L	11	rs11602951	202812	G	A	0.216418	0.386703	0.0682318	1.89359e-07	0.000219312	0.0037617	FALSE
Glu-DL	ENSG00000174915	PTDSS2	11	rs12785860	531224	A	G	0.402985	-0.154577	0.0223719	7.99575e-10	1.93223e-06	5.98612e-05	FALSE
Glu-DL	ENSG00000255108		11	rs7937502	845776	C	T	0.0447761	-0.605816	0.117594	1.61994e-06	0.00207324	0.0249291	FALSE
Glu-DL	ENSG00000110148	CCKBR	11	rs2682121	6328233	G	A	0.160448	0.505468	0.0924548	4.4047e-07	0.000451546	0.00697652	FALSE
Glu-DL	ENSG00000110171	TRIM3	11	rs7117425	6496581	T	G	0.541045	0.128771	0.0249672	1.58173e-06	0.00164837	0.0205437	FALSE
Glu-DL	ENSG00000254838	GVINP1	11	rs12288515	6920508	T	C	0.395522	-0.384224	0.0587431	4.19821e-09	7.03359e-06	0.000189593	FALSE
Glu-DL	ENSG00000291143		11	rs1466682	6926530	T	A	0.608209	0.421463	0.0471225	6.39974e-14	3.45572e-10	2.54185e-08	TRUE
Glu-DL	ENSG00000184933	OR6A2	11	rs12288515	6920508	T	C	0.395522	-0.370525	0.0611541	3.51699e-08	5.11133e-05	0.00107512	FALSE
Glu-DL	ENSG00000283415		11	rs1466682	6926530	T	A	0.608209	0.528038	0.0410238	9.31035e-22	1.88819e-16	4.38997e-14	TRUE
Glu-DL	ENSG00000133812	SBF2	11	rs4910070	9877587	T	C	0.477612	-0.0507868	0.0100109	2.22877e-06	0.00203781	0.0245573	FALSE
Glu-DL	ENSG00000286959		11	rs140872127	11798138	G	A	0.160448	-0.670092	0.0850047	9.11606e-12	3.42451e-08	1.66226e-06	FALSE
Glu-DL	ENSG00000287898		11	rs77889556	17476510	G	A	0.145522	0.508748	0.0939251	5.44173e-07	0.000486824	0.00745433	TRUE
Glu-DL	ENSG00000006071	ABCC8	11	rs985136	17476247	C	G	0.451493	0.252288	0.0344167	1.17147e-10	4.5333e-07	1.63218e-05	TRUE
Glu-DL	ENSG00000302464		11	rs3741202	18013045	G	C	0.58209	-1.19931	0.0788182	4.04504e-26	8.38596e-21	4.78776e-18	TRUE
Glu-DL	ENSG00000166800	LDHAL6A	11	rs3993291	18458192	T	C	0.339552	0.479356	0.0908325	9.68498e-07	0.000888552	0.0123587	FALSE
Glu-DL	ENSG00000309692		11	rs61881133	34919580	T	C	0.0559702	1.4164	0.268947	1.01292e-06	0.00244054	0.0282712	FALSE
Glu-DL	ENSG00000309708		11	rs61881133	34919580	T	C	0.0559702	0.706217	0.123565	1.54504e-07	0.000783547	0.0111144	FALSE
Glu-DL	ENSG00000149089	APIP	11	rs55672020	34884440	T	C	0.33209	0.537964	0.0342014	4.91862e-27	2.55867e-21	1.91731e-18	FALSE
Glu-DL	ENSG00000151348	EXT2	11	rs11037864	44107536	A	T	0.287313	-0.116006	0.0182438	9.43086e-09	2.3069e-05	0.000539151	FALSE
Glu-DL	ENSG00000294396		11	rs11601710	45367674	A	C	0.156716	-0.550609	0.108839	2.36066e-06	0.00233075	0.0271305	FALSE
Glu-DL	ENSG00000149187	CELF1	11	rs12224672	47478848	C	T	0.261194	-0.0853562	0.0163615	1.24145e-06	0.000500567	0.00763552	FALSE
Glu-DL	ENSG00000255240		11	rs78099239	58912443	C	T	0.104478	0.248008	0.0524725	8.84367e-06	0.00267543	0.0304335	FALSE
Glu-DL	ENSG00000303405		11	rs72914704	61132546	G	T	0.0783582	0.918978	0.122509	5.33516e-11	1.40269e-07	5.90087e-06	FALSE
Glu-DL	ENSG00000162174	ASRGL1	11	rs1043789	62393257	G	A	0.36194	-0.0987278	0.0199136	3.54413e-06	0.00361438	0.03818	FALSE
Glu-DL	ENSG00000149541	B3GAT3	11	rs71490396	62662091	A	T	0.227612	-0.208152	0.0427287	4.99773e-06	0.00277384	0.0313153	FALSE
Glu-DL	ENSG00000255432		11	rs10792355	62656384	C	G	0.746269	-0.404333	0.0688446	7.8607e-08	7.9062e-05	0.0015514	FALSE
Glu-DL	ENSG00000168056	LTBP3	11	rs12270054	65555077	C	T	0.227612	-0.188026	0.0308719	3.0641e-08	2.82117e-05	0.000638193	FALSE
Glu-DL	ENSG00000297007		11	rs67995174	65780418	C	G	0.175373	-0.395258	0.0514209	2.26545e-11	5.62834e-08	2.5658e-06	TRUE
Glu-DL	ENSG00000254470	AP5B1	11	rs504437	65725774	G	T	0.179104	-0.272384	0.0473562	1.32248e-07	0.000146576	0.00265062	FALSE
Glu-DL	ENSG00000172803	SNX32	11	rs566266	65806116	A	C	0.384328	0.227527	0.0240784	5.98323e-15	6.06405e-11	5.42571e-09	FALSE
Glu-DL	ENSG00000172613	RAD9A	11	rs72932714	67331152	C	T	0.0858209	-0.126889	0.0260232	4.90903e-06	0.00252707	0.0289934	FALSE
Glu-DL	ENSG00000132740	IGHMBP2	11	rs2508852	68860470	C	T	0.30597	0.195357	0.0372363	1.09993e-06	0.00173726	0.0215173	FALSE
Glu-DL	ENSG00000162341	TPCN2	11	rs3829241	69087895	G	A	0.395522	-0.176542	0.0287746	2.51916e-08	4.32768e-05	0.000933208	FALSE
Glu-DL	ENSG00000287725		11	rs7111999	69093190	G	A	0.492537	-0.440247	0.0678334	5.26121e-09	1.31594e-05	0.000334977	FALSE
Glu-DL	ENSG00000131626	PPFIA1	11	rs3133177	70274679	G	A	0.365672	-0.108096	0.0172047	1.31764e-08	3.23811e-05	0.00072431	FALSE
Glu-DL	ENSG00000137496	IL18BP	11	rs34607504	72205722	A	G	0.0858209	-0.47174	0.0758418	1.73781e-08	2.06303e-05	0.000489794	FALSE
Glu-DL	ENSG00000293324		11	rs61734374	74746011	A	G	0.298507	-0.278126	0.0387295	2.32003e-10	1.45622e-06	4.64342e-05	FALSE
Glu-DL	ENSG00000166435	XRRA1	11	rs12419113	74868704	A	C	0.298507	0.787952	0.0286666	2.30085e-44	9.47529e-37	1.13603e-32	FALSE
Glu-DL	ENSG00000074201	CLNS1A	11	rs67291795	77697832	C	T	0.134328	-0.229926	0.0340364	1.60405e-09	4.13708e-06	0.000118098	FALSE
Glu-DL	ENSG00000254459		11	rs10899404	77751747	C	T	0.246269	0.513056	0.0548549	9.40357e-15	4.89341e-11	4.51301e-09	FALSE
Glu-DL	ENSG00000245832	MIR4300HG	11	rs74525664	82681505	A	G	0.0895522	0.750034	0.0836464	5.75259e-14	1.382e-09	8.67507e-08	FALSE
Glu-DL	ENSG00000137501	SYTL2	11	rs2084080	85879322	G	A	0.152985	-0.296842	0.0574123	1.50175e-06	0.00106708	0.014231	FALSE
Glu-DL	ENSG00000309946		11	rs1452134	86422374	T	C	0.529851	0.251838	0.0340019	8.25419e-11	6.06789e-07	2.10856e-05	FALSE
Glu-DL	ENSG00000285835		11	rs12295107	88175568	G	A	0.123134	0.620008	0.112829	3.91891e-07	0.000412774	0.00644392	TRUE
Glu-DL	ENSG00000123892	RAB38	11	rs2226624	88379376	C	T	0.365672	0.281502	0.058347	6.01561e-06	0.00491494	0.0485398	TRUE
Glu-DL	ENSG00000297932		11	rs10830448	90220123	C	G	0.33209	-0.689306	0.0680778	2.53866e-16	6.14025e-12	6.69255e-10	FALSE
Glu-DL	ENSG00000250519		11	rs115269352	94299563	G	A	0.0522388	0.807347	0.142761	1.99465e-07	0.000178056	0.00312104	FALSE
Glu-DL	ENSG00000020922	MRE11	11	rs647484	94528089	C	G	0.671642	-0.188417	0.028563	3.27144e-09	5.977e-06	0.000163237	FALSE
Glu-DL	ENSG00000306211		11	rs10831415	95732995	A	G	0.406716	-0.702653	0.0800521	1.39717e-13	1.14955e-09	7.37031e-08	FALSE
Glu-DL	ENSG00000149231	CCDC82	11	rs11021552	96364768	C	T	0.123134	0.264803	0.0382537	7.54194e-10	1.84555e-06	5.77731e-05	TRUE
Glu-DL	ENSG00000254968	LINC02763	11	rs2125735	112633287	C	A	0.462687	-0.258358	0.0406883	9.81223e-09	1.08154e-05	0.000280671	FALSE
Glu-DL	ENSG00000110274	CEP164	11	rs516712	117321660	A	G	0.395522	0.114746	0.015907	2.00126e-10	6.59093e-07	2.24493e-05	FALSE
Glu-DL	ENSG00000278376		11	rs564091	118720384	G	A	0.873134	-0.377232	0.0767932	4.24939e-06	0.00225173	0.0263642	FALSE
Glu-DL	ENSG00000120451	SNX19	11	rs73022874	130861542	C	T	0.164179	0.24878	0.0367528	1.50795e-09	4.96213e-06	0.000138679	TRUE
Glu-DL	ENSG00000120647	CCDC77	12	rs9668495	389571	C	G	0.761194	0.245027	0.0405544	3.78606e-08	0.000851775	0.0119386	TRUE
Glu-DL	ENSG00000250770		12	rs887355	3366377	C	T	0.768657	0.54417	0.092751	8.07092e-08	0.000128031	0.00237619	TRUE
Glu-DL	ENSG00000291189		12	rs887355	3366377	C	T	0.768657	0.542206	0.0814102	2.46007e-09	6.65556e-06	0.000180944	TRUE
Glu-DL	ENSG00000010219	DYRK4	12	rs2884671	4617666	T	C	0.473881	0.345525	0.0650409	8.38106e-07	0.00101542	0.0136945	FALSE
Glu-DL	ENSG00000111652	COPS7A	12	rs2103397	6726319	A	G	0.712687	-0.209199	0.0387059	5.71348e-07	0.00113412	0.0150082	FALSE
Glu-DL	ENSG00000111664	GNB3	12	rs1047771	6831857	G	A	0.276119	-0.316837	0.0614422	1.58788e-06	0.00105956	0.0141464	FALSE
Glu-DL	ENSG00000139178	C1RL	12	rs73266762	7090574	T	C	0.0634328	0.746861	0.14832	2.59475e-06	0.00222434	0.0261457	FALSE
Glu-DL	ENSG00000237248	LINC00987	12	rs1805671	9010998	A	G	0.302239	-0.151925	0.0301409	2.54289e-06	0.00179633	0.0220893	FALSE
Glu-DL	ENSG00000295087		12	rs10843400	9318235	C	T	0.380597	-0.356926	0.0737493	5.66738e-06	0.00434572	0.0441923	FALSE
Glu-DL	ENSG00000260423	LINC02367	12	rs73047561	9339598	A	G	0.0820896	0.546041	0.0992878	3.84596e-07	0.000747017	0.0106877	FALSE
Glu-DL	ENSG00000284634		12	rs10844141	9594765	G	A	0.462687	-0.235042	0.0406696	1.17578e-07	0.000141741	0.00257484	FALSE
Glu-DL	ENSG00000295873		12	rs12423201	9279684	T	C	0.0746269	0.542531	0.094287	1.30989e-07	0.000276433	0.00460316	FALSE
Glu-DL	ENSG00000214776		12	rs7301615	9583033	C	G	0.559702	-1.53762	0.0834332	1.30526e-31	3.70108e-25	4.93043e-22	FALSE
Glu-DL	ENSG00000212127	TAS2R14	12	rs7962748	11026839	C	A	0.253731	-0.0736925	0.0133181	3.33906e-07	0.000374852	0.00593694	FALSE
Glu-DL	ENSG00000212127	TAS2R14	12	rs7962748	11026839	C	A	0.253731	-0.0736925	0.0133181	3.33906e-07	0.000374852	0.00593694	FALSE
Glu-DL	ENSG00000231887	PRH1	12	rs68186227	11119112	T	C	0.309702	-0.109365	0.0159053	9.30093e-10	2.37626e-06	7.14034e-05	FALSE
Glu-DL	ENSG00000275119		12	rs10772397	10986084	C	T	0.58209	-0.457973	0.0350452	3.91081e-22	4.06841e-17	1.10859e-14	FALSE
Glu-DL	ENSG00000247157	LINC01252	12	rs2416548	11171577	C	A	0.570895	-0.365452	0.0383013	3.88739e-15	7.26339e-11	6.26503e-09	TRUE
Glu-DL	ENSG00000296981		12	rs1863848	11176054	C	T	0.574627	-0.366082	0.0658411	2.98237e-07	0.000374137	0.00593694	FALSE
Glu-DL	ENSG00000165714	BORCS5	12	rs11054841	12356380	A	C	0.485075	-0.206673	0.0286183	1.928e-10	8.1385e-07	2.7409e-05	FALSE
Glu-DL	ENSG00000255670		12	rs56279058	12544528	T	C	0.201493	0.418385	0.0741352	2.09621e-07	0.000310469	0.00509213	FALSE
Glu-DL	ENSG00000139144	PIK3C2G	12	rs10770343	18261319	C	A	0.705224	0.425128	0.0640806	2.76305e-09	7.62311e-06	0.000203104	TRUE
Glu-DL	ENSG00000309085		12	rs10770343	18261319	C	A	0.705224	0.405361	0.0841639	6.21549e-06	0.00381152	0.0395996	TRUE
Glu-DL	ENSG00000118308	IRAG2	12	rs10771161	25044482	C	A	0.455224	-0.417976	0.0724379	1.2229e-07	0.000146905	0.00265256	FALSE
Glu-DL	ENSG00000013573	DDX11	12	rs2005898	31089784	T	C	0.455224	-1.05796	0.0785766	6.90606e-23	3.40672e-17	9.7249e-15	FALSE
Glu-DL	ENSG00000165966	PDZRN4	12	rs287048	41623661	T	A	0.779851	0.3482	0.0741476	9.9561e-06	0.00496785	0.048781	FALSE
Glu-DL	ENSG00000257239		12	rs10459288	41918266	A	C	0.589552	0.420683	0.0628058	2.07423e-09	3.28395e-06	9.6977e-05	FALSE
Glu-DL	ENSG00000134283	PPHLN1	12	rs11181414	42310263	T	C	0.152985	0.136061	0.027089	2.73126e-06	0.00186712	0.0227533	FALSE
Glu-DL	ENSG00000139168	ZCRB1	12	rs712115	42169904	A	T	0.608209	-0.243667	0.0481504	2.34531e-06	0.00192149	0.023341	FALSE
Glu-DL	ENSG00000269514		12	rs10875764	48189190	T	C	0.559702	-0.586564	0.0736744	6.32654e-12	2.51227e-08	1.23978e-06	FALSE
Glu-DL	ENSG00000110844	PRPF40B	12	rs1248365	49568784	G	A	0.690298	-0.091604	0.0181074	2.36042e-06	0.00109461	0.0145496	FALSE
Glu-DL	ENSG00000139624	CERS5	12	rs7301740	50126208	C	G	0.623134	-0.264788	0.0250485	3.1944e-17	8.34006e-13	1.01003e-10	FALSE
Glu-DL	ENSG00000066084	DIP2B	12	rs2302900	50205926	T	C	0.354478	-0.0824624	0.0140601	8.1407e-08	5.11027e-05	0.00107512	FALSE
Glu-DL	ENSG00000050438	SLC4A8	12	rs7131892	51456943	A	G	0.507463	-0.0916382	0.018196	2.5874e-06	0.00226509	0.0264682	FALSE
Glu-DL	ENSG00000111077	TNS2	12	rs11610008	53046798	C	T	0.55597	0.202672	0.0374451	5.53393e-07	0.000576749	0.00861132	TRUE
Glu-DL	ENSG00000139631	CSAD	12	rs113925811	52915148	C	A	0.152985	-0.163719	0.032724	2.95669e-06	0.00212999	0.0253599	FALSE
Glu-DL	ENSG00000123415	SMUG1	12	rs2233921	54182016	C	A	0.376866	0.396065	0.0418939	5.85698e-15	5.99462e-11	5.40391e-09	FALSE
Glu-DL	ENSG00000135424	ITGA7	12	rs7306191	55686380	T	G	0.522388	-0.273036	0.0467337	8.97216e-08	5.50216e-05	0.00113542	FALSE
Glu-DL	ENSG00000123427	EEF1AKMT3	12	rs1633360	57714269	C	T	0.570895	-0.270719	0.0521232	1.3644e-06	0.000821339	0.011558	FALSE
Glu-DL	ENSG00000288591		12	rs3741742	64879256	C	T	0.455224	-0.205199	0.0374286	4.13258e-07	0.000272542	0.00454467	FALSE
Glu-DL	ENSG00000156076	WIF1	12	rs1445440	64997101	C	T	0.104478	0.815793	0.144423	2.0515e-07	0.000199615	0.00345848	FALSE
Glu-DL	ENSG00000127311	HELB	12	rs12146757	66300695	T	C	0.492537	0.309218	0.0448482	8.54352e-10	2.21887e-06	6.73494e-05	FALSE
Glu-DL	ENSG00000127328	RAB3IP	12	rs1689465	69988678	A	G	0.776119	-0.188392	0.038931	5.68051e-06	0.00448217	0.0451206	TRUE
Glu-DL	ENSG00000166268	MYRFL	12	rs775462	69710168	A	G	0.104478	1.05429	0.118695	8.54408e-14	1.45557e-09	9.0372e-08	FALSE
Glu-DL	ENSG00000257815	PRANCR	12	rs79030725	70149099	G	A	0.13806	0.59706	0.0531057	1.44038e-18	7.55032e-14	1.10395e-11	TRUE
Glu-DL	ENSG00000251138	LINC02882	12	rs61932696	74484776	G	A	0.0783582	1.00164	0.128038	1.20464e-11	8.31617e-08	3.63891e-06	FALSE
Glu-DL	ENSG00000180481	GLIPR1L2	12	rs12369556	75379684	G	A	0.376866	-0.728766	0.0614812	8.89675e-20	3.07385e-15	5.48256e-13	FALSE
Glu-DL	ENSG00000257526		12	rs61057704	76302824	G	A	0.0597015	-0.578496	0.11769	4.19715e-06	0.00446931	0.045029	FALSE
Glu-DL	ENSG00000258084		12	rs80112013	78249652	T	C	0.0932836	0.517338	0.107682	6.51695e-06	0.00409602	0.0421174	TRUE
Glu-DL	ENSG00000198707	CEP290	12	rs2730487	88041768	T	C	0.891791	-0.185244	0.0400838	1.32949e-05	0.00290134	0.0324328	FALSE
Glu-DL	ENSG00000289384		12	rs114039518	88316373	C	T	0.108209	0.431602	0.0824957	1.16784e-06	0.000478529	0.00734609	FALSE
Glu-DL	ENSG00000011465	DCN	12	rs63670660	90687898	A	T	0.544776	-0.219761	0.0456968	6.39479e-06	0.00410878	0.0422124	FALSE
Glu-DL	ENSG00000136044	APPL2	12	rs935249	105187349	C	T	0.843284	-0.147777	0.0237304	1.68316e-08	3.15654e-05	0.000708711	FALSE
Glu-DL	ENSG00000295957		12	rs10861553	106059036	G	T	0.503731	-0.427756	0.0616923	7.16189e-10	1.99512e-06	6.15258e-05	FALSE
Glu-DL	ENSG00000075035	WSCD2	12	rs338168	108142081	C	T	0.727612	-0.366178	0.0758666	5.96854e-06	0.00443005	0.0447463	FALSE
Glu-DL	ENSG00000089022	MAPKAPK5	12	rs12300518	112127668	G	T	0.134328	-0.179822	0.0397728	1.95265e-05	0.00209657	0.0250865	FALSE
Glu-DL	ENSG00000151176	PLBD2	12	rs12825284	113358594	T	C	0.160448	-0.185125	0.0353729	1.15968e-06	0.00102673	0.0138158	TRUE
Glu-DL	ENSG00000176834	VSIG10	12	rs71452642	118265245	C	T	0.100746	-0.384593	0.0539179	2.89275e-10	2.40004e-05	0.000557411	FALSE
Glu-DL	ENSG00000111780		12	rs7295097	120585686	G	C	0.529851	-0.286806	0.0484413	6.40337e-08	0.000103967	0.00197231	FALSE
Glu-DL	ENSG00000157837	SPPL3	12	rs558275	120759088	A	G	0.634328	-0.0869557	0.0152915	1.74636e-07	0.00024505	0.00416149	FALSE
Glu-DL	ENSG00000308932		12	rs146770563	121201000	C	T	0.152985	0.532803	0.0986145	5.75987e-07	0.000523312	0.00793201	FALSE
Glu-DL	ENSG00000295862		12	rs59304889	121210783	A	C	0.152985	0.390442	0.0709867	3.83571e-07	0.000651889	0.00956644	TRUE
Glu-DL	ENSG00000139725	RHOF	12	rs1168671	121791942	C	T	0.716418	0.252838	0.038364	3.36136e-09	4.32208e-06	0.000122504	FALSE
Glu-DL	ENSG00000130921	MTRFR	12	rs58991895	123147820	C	G	0.0559702	0.472407	0.081099	9.66448e-08	6.51411e-05	0.00130822	FALSE
Glu-DL	ENSG00000111364	DDX55	12	rs5027860	123548272	A	G	0.156716	-0.173147	0.031882	5.12568e-07	0.0003363	0.00543402	FALSE
Glu-DL	ENSG00000249345	LINC02405	12	rs7308454	127121530	T	C	0.208955	0.336073	0.0656418	1.84481e-06	0.0020821	0.0249667	FALSE
Glu-DL	ENSG00000249345	LINC02405	12	rs7308454	127121530	T	C	0.208955	0.336073	0.0656418	1.84481e-06	0.0020821	0.0249667	FALSE
Glu-DL	ENSG00000286922		12	rs12366306	127505905	T	C	0.548507	-0.346526	0.0645519	6.65345e-07	0.000703933	0.0101712	FALSE
Glu-DL	ENSG00000111452	ADGRD1	12	rs884943	131137961	T	C	0.507463	0.25918	0.0525559	3.93647e-06	0.00495549	0.0487714	FALSE
Glu-DL	ENSG00000198598	MMP17	12	rs34515698	131840831	C	T	0.0820896	-0.325126	0.0654012	3.35828e-06	0.00376721	0.0393095	FALSE
Glu-DL	ENSG00000177084	POLE	12	rs10781634	132730003	C	T	0.328358	0.170075	0.0233421	1.43494e-10	7.71534e-07	2.6057e-05	TRUE
Glu-DL	ENSG00000132958	TPTE2	13	rs34172801	19894812	C	T	0.0970149	-0.451508	0.0771572	8.61626e-08	0.000104224	0.00197407	FALSE
Glu-DL	ENSG00000032742	IFT88	13	rs9509294	20600506	T	A	0.451493	-0.169788	0.0188947	5.25488e-14	4.76505e-10	3.40061e-08	FALSE
Glu-DL	ENSG00000289217		13	rs9550884	22928661	C	T	0.503731	0.308116	0.0591849	1.29817e-06	0.00203464	0.0245573	FALSE
Glu-DL	ENSG00000243008		13	rs2483398	24986614	T	C	0.38806	0.345077	0.0515715	2.13985e-09	1.74266e-05	0.000423804	FALSE
Glu-DL	ENSG00000151849	CENPJ	13	rs9507404	24760500	G	T	0.182836	-0.170446	0.0324897	1.10102e-06	0.0015584	0.01973	FALSE
Glu-DL	ENSG00000291041		13	rs61947521	24904700	T	C	0.156716	-0.309764	0.0418158	8.20693e-11	5.91347e-07	2.06102e-05	FALSE
Glu-DL	ENSG00000285935		13	rs2094499	26698365	C	T	0.615672	0.462797	0.0693436	2.3123e-09	4.5916e-06	0.000129531	TRUE
Glu-DL	ENSG00000289569		13	rs9508098	28633215	T	C	0.608209	-0.226815	0.0451752	2.7529e-06	0.0024218	0.0280812	FALSE
Glu-DL	ENSG00000139514	SLC7A1	13	rs4769764	29655827	C	T	0.216418	0.148904	0.0298043	3.04048e-06	0.00336946	0.036182	FALSE
Glu-DL	ENSG00000309792		13	rs202102	30324079	T	C	0.63806	0.193248	0.0386914	3.05821e-06	0.00347063	0.0369874	FALSE
Glu-DL	ENSG00000102781	KATNAL1	13	rs75114264	30402090	C	T	0.0597015	-0.205928	0.0414957	3.47627e-06	0.00441009	0.0446198	FALSE
Glu-DL	ENSG00000244754	N4BP2L2	13	rs2010997	32496369	G	A	0.402985	-0.0814674	0.0149607	4.82401e-07	0.000455453	0.00702783	FALSE
Glu-DL	ENSG00000083642	PDS5B	13	rs1207954	32405316	G	C	0.776119	0.0827039	0.0163249	2.29303e-06	0.00159091	0.0200148	FALSE
Glu-DL	ENSG00000230490		13	rs9538300	33676841	T	C	0.287313	0.453707	0.0662076	1.03307e-09	3.46371e-06	0.000101288	TRUE
Glu-DL	ENSG00000133119	RFC3	13	rs9563851	33854668	T	C	0.0671642	-0.316147	0.0618098	1.88229e-06	0.0016224	0.0203044	FALSE
Glu-DL	ENSG00000120669	SOHLH2	13	rs9547233	36312940	T	G	0.317164	0.656226	0.0810271	3.33841e-12	1.08888e-08	5.90727e-07	FALSE
Glu-DL	ENSG00000242715	CCDC169	13	rs2281865	36297627	G	A	0.33209	0.290099	0.0560446	1.46614e-06	0.00142728	0.0183019	TRUE
Glu-DL	ENSG00000120693	SMAD9	13	rs9566169	36918335	G	A	0.201493	0.256566	0.0489646	1.1301e-06	0.000997785	0.0135634	TRUE
Glu-DL	ENSG00000133110	POSTN	13	rs9576174	37101843	G	A	0.406716	-0.826784	0.10538	1.08391e-11	4.16566e-08	1.95906e-06	FALSE
Glu-DL	ENSG00000023516	AKAP11	13	rs146061909	42287486	G	A	0.242537	-0.145565	0.023645	2.299e-08	4.07494e-05	0.000884087	FALSE
Glu-DL	ENSG00000151773	CCDC122	13	rs12428112	43901685	C	A	0.488806	0.292232	0.0461404	1.05395e-08	2.02091e-05	0.000480746	FALSE
Glu-DL	ENSG00000273149		13	rs7998752	45311908	C	A	0.33209	-0.397972	0.0489108	2.79832e-12	4.93433e-08	2.27538e-06	TRUE
Glu-DL	ENSG00000123179	EBPL	13	rs1407636	49759746	G	T	0.253731	-0.344627	0.0425126	3.22175e-12	2.20533e-07	8.72628e-06	FALSE
Glu-DL	ENSG00000295839		13	rs59931782	49965738	C	T	0.145522	0.429237	0.0498529	3.06079e-13	8.07329e-09	4.48121e-07	FALSE
Glu-DL	ENSG00000150510	FAM124A	13	rs7983188	51257150	G	A	0.36194	-0.176255	0.0324066	4.95808e-07	0.000800323	0.0113153	FALSE
Glu-DL	ENSG00000281106	TMEM272	13	rs17076104	51919719	C	T	0.175373	-0.37242	0.0764871	5.0461e-06	0.00208239	0.0249667	FALSE
Glu-DL	ENSG00000273784		13	rs9563116	52727001	C	T	0.287313	0.330017	0.0681442	5.59601e-06	0.00461255	0.0462777	FALSE
Glu-DL	ENSG00000150361	KLHL1	13	rs9542290	70364248	C	T	0.216418	0.142267	0.0271415	1.12159e-06	0.00147986	0.0188752	TRUE
Glu-DL	ENSG00000188243	COMMD6	13	rs3812844	75549320	C	T	0.537313	0.292355	0.0551923	8.93107e-07	0.00151454	0.0192969	TRUE
Glu-DL	ENSG00000285902		13	rs1212082	79552633	G	A	0.373134	0.666482	0.0853691	1.29695e-11	1.21313e-07	5.17608e-06	FALSE
Glu-DL	ENSG00000229175	LINC00382	13	rs2783125	79583755	G	A	0.373134	0.423296	0.0708776	5.12439e-08	6.3204e-05	0.00127788	FALSE
Glu-DL	ENSG00000288016		13	rs11842675	84158075	T	C	0.0820896	-1.01441	0.195119	1.33612e-06	0.000719745	0.0103345	FALSE
Glu-DL	ENSG00000134874	DZIP1	13	rs12429385	95649682	A	G	0.130597	0.133443	0.0265695	2.73495e-06	0.00212007	0.0253172	FALSE
Glu-DL	ENSG00000092094	OSGEP	14	rs2275006	20452181	A	G	0.548507	0.223135	0.0247771	4.79228e-14	5.03457e-10	3.52992e-08	FALSE
Glu-DL	ENSG00000100804	PSMB5	14	rs8013143	23025068	A	G	0.328358	-0.402682	0.0431586	1.0459e-14	1.62563e-10	1.30808e-08	TRUE
Glu-DL	ENSG00000254692		14	rs8007272	24209082	A	G	0.104478	-0.453022	0.0633614	2.67826e-10	1.02137e-06	3.34582e-05	FALSE
Glu-DL	ENSG00000092108	SCFD1	14	rs7156431	30547346	C	G	0.343284	0.0970954	0.0148537	4.27345e-09	5.86521e-06	0.000160917	FALSE
Glu-DL	ENSG00000129521	EGLN3	14	rs10130238	34150498	C	T	0.149254	0.181962	0.0359397	2.32215e-06	0.00380453	0.0395612	FALSE
Glu-DL	ENSG00000258526		14	rs1950338	39435722	C	G	0.216418	-0.221313	0.017327	1.44199e-21	9.58431e-16	1.91517e-13	FALSE
Glu-DL	ENSG00000100504	PYGL	14	rs11627694	50977250	C	T	0.0410448	0.977293	0.169161	1.18595e-07	0.000177053	0.00310801	FALSE
Glu-DL	ENSG00000304191		14	rs61984158	51250693	G	A	0.164179	-0.499353	0.0661928	4.38353e-11	2.41683e-07	9.40122e-06	FALSE
Glu-DL	ENSG00000151812	SLC35F4	14	rs1950993	57771969	G	T	0.380597	0.488219	0.0582996	9.22592e-13	4.83473e-09	2.73423e-07	TRUE
Glu-DL	ENSG00000258289	CHURC1	14	rs10142379	64888228	A	G	0.242537	-0.229567	0.0411338	2.73079e-07	0.000561669	0.0084493	FALSE
Glu-DL	ENSG00000139998	RAB15	14	rs1957426	64888857	A	G	0.712687	0.160066	0.0321111	3.18143e-06	0.00315663	0.0344057	FALSE
Glu-DL	ENSG00000257759		14	rs1057127	70581841	C	T	0.205224	-0.220626	0.0435743	2.31995e-06	0.0029935	0.0332147	FALSE
Glu-DL	ENSG00000119599	DCAF4	14	rs11158985	72875234	A	T	0.175373	0.290291	0.053654	5.58175e-07	0.00214902	0.02546	FALSE
Glu-DL	ENSG00000140043	PTGR2	14	rs78113886	73835860	C	T	0.376866	-0.409772	0.0388875	3.73382e-17	3.27164e-12	3.6659e-10	FALSE
Glu-DL	ENSG00000119725	ZNF410	14	rs62006128	73949296	G	A	0.402985	0.164061	0.0320212	1.81734e-06	0.002145	0.02546	FALSE
Glu-DL	ENSG00000258454		14	rs11621985	76142124	G	T	0.600746	0.393505	0.0729196	5.91692e-07	0.000629206	0.00925622	FALSE
Glu-DL	ENSG00000119715	ESRRB	14	rs1900127	76196103	C	T	0.619403	0.424898	0.0610511	6.36457e-10	1.88111e-06	5.85804e-05	FALSE
Glu-DL	ENSG00000286437		14	rs2885625	76838406	A	G	0.0970149	0.760374	0.122559	1.86361e-08	3.79376e-05	0.000834587	FALSE
Glu-DL	ENSG00000100629	CEP128	14	rs10136404	80944955	G	A	0.645522	-0.121427	0.0216571	2.44853e-07	0.00017157	0.00302504	FALSE
Glu-DL	ENSG00000054983	GALC	14	rs78140438	87952269	C	T	0.182836	-0.392301	0.0334552	1.58537e-19	9.37016e-15	1.56032e-12	FALSE
Glu-DL	ENSG00000042317	SPATA7	14	rs35823815	88361089	G	A	0.179104	0.338707	0.0339076	4.79123e-16	9.4484e-12	1.00249e-09	FALSE
Glu-DL	ENSG00000258983		14	rs79579293	88355724	A	G	0.287313	0.83306	0.0732106	7.72125e-19	2.73083e-14	4.19757e-12	FALSE
Glu-DL	ENSG00000165929	TC2N	14	rs12589636	91821399	G	C	0.317164	0.460162	0.082268	2.59083e-07	0.00032108	0.00524464	FALSE
Glu-DL	ENSG00000176438	SYNE3	14	rs12431494	95527049	A	C	0.440298	0.595462	0.0764723	1.42587e-11	6.08485e-08	2.76341e-06	FALSE
Glu-DL	ENSG00000258702		14	rs75564413	96593254	G	A	0.115672	-0.542873	0.0784258	7.54768e-10	3.21432e-06	9.51553e-05	TRUE
Glu-DL	ENSG00000182218	HHIPL1	14	rs11160531	99606442	G	C	0.761194	0.423649	0.0426942	6.52929e-16	3.43428e-11	3.2168e-09	FALSE
Glu-DL	ENSG00000140105	WARS1	14	rs3736952	100330141	C	T	0.171642	0.250792	0.0351687	2.91697e-10	9.50632e-06	0.000249399	FALSE
Glu-DL	ENSG00000196663	TECPR2	14	rs8005966	102431374	A	G	0.0746269	-0.240088	0.0503167	7.41267e-06	0.00418547	0.0428312	FALSE
Glu-DL	ENSG00000075413	MARK3	14	rs28626081	103414413	C	G	0.38806	0.0983665	0.015024	4.07697e-09	7.58296e-06	0.000202484	FALSE
Glu-DL	ENSG00000258534		14	rs6576010	103883265	A	G	0.615672	0.449617	0.0716886	1.38395e-08	1.83458e-05	0.000444355	FALSE
Glu-DL	ENSG00000184990	SIVA1	14	rs1133044	104759642	C	G	0.156716	-0.337998	0.048581	6.43154e-10	9.52726e-06	0.000249403	FALSE
Glu-DL	ENSG00000258593		14	rs61995995	104877956	C	T	0.511194	-0.384147	0.0695974	3.53655e-07	0.000424739	0.00659634	FALSE
Glu-DL	ENSG00000294960		14	rs4983388	104851780	G	A	0.679105	-0.420417	0.0837313	2.75019e-06	0.00231689	0.0270216	FALSE
Glu-DL	ENSG00000307120		14	rs8010844	105087325	T	C	0.891791	-0.388308	0.0713929	4.95454e-07	0.000443248	0.00685715	TRUE
Glu-DL	ENSG00000299052		14	rs8021330	105536015	C	A	0.246269	0.402667	0.08021	2.75987e-06	0.000604921	0.00894286	FALSE
Glu-DL	ENSG00000259905	PWRN1	15	rs117354672	24563492	G	A	0.0746269	-0.546907	0.0946048	1.16749e-07	0.000207081	0.00358266	FALSE
Glu-DL	ENSG00000259905	PWRN1	15	rs117354672	24563492	G	A	0.0746269	-0.546907	0.0946048	1.16749e-07	0.000207081	0.00358266	FALSE
Glu-DL	ENSG00000182256	GABRG3	15	rs62003773	27448057	A	C	0.0634328	-0.277104	0.055077	2.63965e-06	0.00218013	0.0257577	FALSE
Glu-DL	ENSG00000291082	HERC2P9	15	rs8036234	28716985	G	A	0.123134	-0.357482	0.0582656	2.51876e-08	1.19419e-05	0.000307246	FALSE
Glu-DL	ENSG00000104059	ENTREP2	15	rs4489949	29621866	A	G	0.0634328	-0.329853	0.0658555	2.8896e-06	0.00320859	0.0348453	TRUE
Glu-DL	ENSG00000198690	FAN1	15	rs7171208	30906726	A	G	0.597015	0.168219	0.0297822	2.05429e-07	0.000196986	0.00342283	FALSE
Glu-DL	ENSG00000166922	SCG5	15	rs11635997	32641892	G	A	0.533582	0.23718	0.0295348	4.58989e-12	4.50282e-08	2.10063e-06	TRUE
Glu-DL	ENSG00000169857	AVEN	15	rs597172	33989155	C	A	0.779851	0.227013	0.027968	3.06898e-12	1.4246e-08	7.39403e-07	FALSE
Glu-DL	ENSG00000307201		15	rs71464878	34572034	A	C	0.141791	0.542143	0.110551	4.39256e-06	0.00283415	0.0318163	FALSE
Glu-DL	ENSG00000215252	GOLGA8B	15	rs12592118	34592677	C	G	0.488806	0.36072	0.0485389	7.35768e-11	2.03725e-07	8.16907e-06	FALSE
Glu-DL	ENSG00000128891	CCDC32	15	rs12913296	40552023	G	A	0.477612	-0.258373	0.0282254	2.39108e-14	6.43428e-10	4.3339e-08	FALSE
Glu-DL	ENSG00000285942		15	rs73404717	42505074	C	T	0.0522388	-0.33939	0.0657407	1.55022e-06	0.00115765	0.0153028	TRUE
Glu-DL	ENSG00000285080		15	rs540587	43185915	G	C	0.839552	0.310643	0.0335913	1.54039e-14	8.98125e-11	7.53007e-09	TRUE
Glu-DL	ENSG00000285117		15	rs4924709	43165534	A	C	0.876866	0.337554	0.0467849	1.98795e-10	5.26138e-07	1.84988e-05	FALSE
Glu-DL	ENSG00000185880	TRIM69	15	rs17588305	44729568	C	T	0.130597	-0.599356	0.0570356	4.27008e-17	1.09551e-11	1.12261e-09	TRUE
Glu-DL	ENSG00000273674		15	rs12904989	50969861	A	G	0.541045	0.219426	0.0346741	1.07892e-08	2.01932e-05	0.000480746	FALSE
Glu-DL	ENSG00000259240	MIR4713HG	15	rs12592889	51502975	G	A	0.507463	0.422574	0.049341	3.79152e-13	3.29224e-09	1.91612e-07	FALSE
Glu-DL	ENSG00000186417	GLDN	15	rs2445761	51323419	T	C	0.518657	-0.385014	0.0634586	3.39241e-08	3.85521e-05	0.000845004	TRUE
Glu-DL	ENSG00000259556		15	rs2448946	51890635	T	C	0.376866	-0.283483	0.0607574	1.11967e-05	0.00428073	0.0436054	FALSE
Glu-DL	ENSG00000069956	MAPK6	15	rs1035739	51962709	A	G	0.410448	-0.134354	0.0197967	1.39263e-09	3.72057e-06	0.000107447	FALSE
Glu-DL	ENSG00000069943	PIGB	15	rs8036244	55292572	T	G	0.406716	0.293517	0.0554176	8.9516e-07	0.00120671	0.0158638	FALSE
Glu-DL	ENSG00000069974	RAB27A	15	rs11639453	55293924	A	G	0.115672	0.290981	0.0501189	1.04969e-07	0.000241782	0.00411182	FALSE
Glu-DL	ENSG00000182718	ANXA2	15	rs11635314	60736287	C	T	0.145522	0.390748	0.0755764	1.50241e-06	0.00161424	0.0202658	FALSE
Glu-DL	ENSG00000259316		15	rs8040233	63987635	C	T	0.589552	-0.339486	0.065659	1.50119e-06	0.000818702	0.0115412	FALSE
Glu-DL	ENSG00000166839	ANKDD1A	15	rs869043	64878841	G	A	0.339552	0.221877	0.024484	3.67767e-14	1.83326e-10	1.44604e-08	FALSE
Glu-DL	ENSG00000274383		15	rs11637902	64986467	C	T	0.552239	-0.463094	0.0824989	2.38211e-07	0.000152827	0.00274298	FALSE
Glu-DL	ENSG00000166938	DIS3L	15	rs4776774	66280354	A	G	0.0634328	0.697636	0.0754782	1.57556e-14	3.87054e-09	2.23104e-07	FALSE
Glu-DL	ENSG00000137764	MAP2K5	15	rs12902812	67616941	G	A	0.242537	-0.0916753	0.016576	3.37636e-07	0.000308611	0.00507388	FALSE
Glu-DL	ENSG00000138621	PPCDC	15	rs78404800	74998371	C	T	0.0746269	0.232613	0.0390715	5.55616e-08	3.78086e-05	0.000833279	FALSE
Glu-DL	ENSG00000140367	UBE2Q2	15	rs9796550	75978097	A	G	0.425373	0.125245	0.0232134	5.94217e-07	0.000392877	0.00619785	FALSE
Glu-DL	ENSG00000169752	NRG4	15	rs4886747	75858740	G	A	0.787313	0.385345	0.0766546	2.68446e-06	0.001429	0.0183044	FALSE
Glu-DL	ENSG00000140386	SCAPER	15	rs7174096	76780059	A	G	0.503731	-0.0609211	0.0112565	5.54324e-07	0.000260574	0.00440019	FALSE
Glu-DL	ENSG00000259420		15	rs62009087	77540722	C	T	0.391791	0.213485	0.0397584	6.61584e-07	0.000884757	0.0123346	FALSE
Glu-DL	ENSG00000169684	CHRNA5	15	rs77434238	78544384	T	C	0.626866	-0.315312	0.0545787	1.18642e-07	0.000152708	0.00274298	FALSE
Glu-DL	ENSG00000188659	SAXO2	15	rs778808130	82313958	G	C	0.0485075	0.968406	0.103996	1.1395e-14	9.06647e-10	5.93139e-08	FALSE
Glu-DL	ENSG00000278662	GOLGA6L10	15	rs17507216	82558175	G	A	0.220149	-0.669088	0.090077	7.48102e-11	2.2353e-07	8.7869e-06	FALSE
Glu-DL	ENSG00000278662	GOLGA6L10	15	rs17507216	82558175	G	A	0.220149	-0.669088	0.090077	7.48102e-11	2.2353e-07	8.7869e-06	FALSE
Glu-DL	ENSG00000278662	GOLGA6L10	15	rs17507216	82558175	G	A	0.220149	-0.669088	0.090077	7.48102e-11	2.2353e-07	8.7869e-06	FALSE
Glu-DL	ENSG00000290945		15	rs879229335	82300349	T	A	0.358209	-0.16648	0.027725	4.45097e-08	5.3532e-05	0.00111041	FALSE
Glu-DL	ENSG00000290948		15	rs62011126	82412929	A	C	0.686567	0.277589	0.0488087	1.74094e-07	0.000169119	0.00299062	FALSE
Glu-DL	ENSG00000259805		15	rs1877241	82767076	G	A	0.791045	0.187329	0.038781	5.87904e-06	0.00277144	0.0313153	FALSE
Glu-DL	ENSG00000259986		15	rs716886	83047101	G	A	0.294776	-0.200157	0.0294347	1.31101e-09	3.49935e-06	0.000102081	FALSE
Glu-DL	ENSG00000290688		15	rs12595694	84147023	A	T	0.541045	0.420943	0.0657541	7.79103e-09	1.3355e-05	0.000338518	FALSE
Glu-DL	ENSG00000290689		15	rs62029647	84529327	C	T	0.201493	0.575753	0.0967656	5.64215e-08	5.83774e-05	0.00119848	FALSE
Glu-DL	ENSG00000259683		15	rs4494498	84148400	T	G	0.757463	-0.823617	0.0828168	5.88621e-16	1.72616e-11	1.65565e-09	FALSE
Glu-DL	ENSG00000259551		15	rs2563917	84395136	G	A	0.794776	-0.664023	0.0782084	5.35911e-13	5.81351e-09	3.27233e-07	FALSE
Glu-DL	ENSG00000310356		15	rs12901468	84164180	G	A	0.205224	0.924232	0.0915022	2.84747e-16	1.52086e-11	1.49461e-09	FALSE
Glu-DL	ENSG00000310306		15	rs2879974	84569230	C	A	0.783582	-0.38526	0.0635122	3.41077e-08	5.19553e-05	0.00108711	FALSE
Glu-DL	ENSG00000230373	GOLGA6L5P	15	rs12902672	84048234	G	A	0.223881	-0.518498	0.108882	7.69425e-06	0.00397872	0.0410521	FALSE
Glu-DL	ENSG00000183655	KLHL25	15	rs2614657	85769817	T	C	0.802239	-0.201254	0.0363191	3.22801e-07	0.000381633	0.00603636	FALSE
Glu-DL	ENSG00000289128		15	rs150293	89391586	G	A	0.317164	-0.133622	0.0240363	2.99406e-07	0.000291704	0.00482394	FALSE
Glu-DL	ENSG00000259713		15	rs11632393	89503223	C	T	0.287313	-0.653568	0.0756293	2.63898e-13	1.75532e-09	1.07374e-07	FALSE
Glu-DL	ENSG00000140534	TICRR	15	rs11632393	89503223	C	T	0.287313	-0.416556	0.0729387	1.57352e-07	0.000164142	0.00292418	FALSE
Glu-DL	ENSG00000260661		15	rs3743365	92394038	G	T	0.768657	-0.739719	0.0819954	4.44997e-14	4.82609e-10	3.42379e-08	TRUE
Glu-DL	ENSG00000309057		15	rs3743365	92394038	G	T	0.768657	-0.620144	0.0834861	7.47586e-11	3.32827e-07	1.247e-05	TRUE
Glu-DL	ENSG00000103852	TTC23	15	rs10152456	99270643	T	A	0.496269	-0.317552	0.0601809	9.71395e-07	0.00193952	0.0235361	FALSE
Glu-DL	ENSG00000183060	LYSMD4	15	rs35747287	99733402	G	C	0.675373	-0.495961	0.0462711	1.61281e-17	2.6132e-13	3.4812e-11	TRUE
Glu-DL	ENSG00000259363		15	rs9920179	99794001	C	A	0.141791	-0.492716	0.07945	1.88462e-08	5.34229e-05	0.00111007	FALSE
Glu-DL	ENSG00000270127		15	rs12460	100569613	G	A	0.55597	0.654406	0.0676656	2.11822e-15	1.40575e-11	1.39291e-09	FALSE
Glu-DL	ENSG00000140471	LINS1	15	rs36053285	100574435	T	C	0.406716	-0.42946	0.0345953	7.13361e-21	1.27946e-15	2.47418e-13	FALSE
Glu-DL	ENSG00000184254	ALDH1A3	15	rs7178773	100850469	G	A	0.473881	-0.450217	0.0682131	3.21926e-09	9.08018e-06	0.000239793	FALSE
Glu-DL	ENSG00000185418	TARS3	15	rs55653250	101716314	C	T	0.402985	0.173403	0.0261282	2.73419e-09	1.92395e-05	0.000462266	FALSE
Glu-DL	ENSG00000103148	NPRL3	16	rs2032509	106495	G	A	0.33209	-0.151672	0.0208936	1.62344e-10	4.0187e-06	0.000114993	FALSE
Glu-DL	ENSG00000129925	PGAP6	16	rs4470149	820735	T	C	0.514925	-0.193154	0.0394286	4.48355e-06	0.00404585	0.0416373	FALSE
Glu-DL	ENSG00000103245	CIAO3	16	rs2071951	733004	T	C	0.208955	0.279943	0.0455073	2.34613e-08	4.92071e-05	0.00103867	FALSE
Glu-DL	ENSG00000059122	FLYWCH1	16	rs9930148	2942113	T	C	0.567164	0.141963	0.0271556	1.18737e-06	0.00105543	0.0141228	FALSE
Glu-DL	ENSG00000262362		16	rs12709152	2989007	G	C	0.597015	0.378889	0.0503752	4.86526e-11	1.55119e-07	6.39104e-06	FALSE
Glu-DL	ENSG00000262312		16	rs12933120	3584745	C	A	0.108209	-0.454487	0.0913797	3.32683e-06	0.00300567	0.0332745	FALSE
Glu-DL	ENSG00000263105		16	rs887096	4180223	G	C	0.645522	-0.300505	0.0615353	4.76582e-06	0.00366223	0.0384484	FALSE
Glu-DL	ENSG00000140623	SEPTIN12	16	rs1982514	4795531	A	G	0.473881	0.473672	0.075032	1.15436e-08	5.82702e-05	0.00119833	TRUE
Glu-DL	ENSG00000267077		16	rs1982514	4795531	A	G	0.473881	0.309601	0.0609955	2.20499e-06	0.00417365	0.0427689	TRUE
Glu-DL	ENSG00000285952		16	rs56400014	4796532	G	A	0.41791	0.544861	0.0593278	2.07744e-14	2.17219e-10	1.64831e-08	FALSE
Glu-DL	ENSG00000234719	NPIPB2	16	rs393329	11976565	T	C	0.570895	-1.21842	0.0849012	1.52135e-24	4.9923e-19	2.06396e-16	TRUE
Glu-DL	ENSG00000103550	KNOP1	16	rs1016971	19707403	T	A	0.186567	0.287318	0.0408531	4.56253e-10	5.27861e-06	0.000146499	FALSE
Glu-DL	ENSG00000158486	DNAH3	16	rs12598129	21191158	C	T	0.19403	0.738098	0.0860934	3.63739e-13	1.16777e-09	7.44728e-08	FALSE
Glu-DL	ENSG00000290192		16	rs2379640	21378777	G	T	0.619403	-0.240101	0.0467365	1.71791e-06	0.00248558	0.0286545	FALSE
Glu-DL	ENSG00000243716	NPIPB5	16	rs8047148	22363509	G	A	0.764925	0.302623	0.0568621	8.05392e-07	0.000421404	0.00656155	FALSE
Glu-DL	ENSG00000262155	LINC02175	16	rs34225025	25029615	C	T	0.380597	-0.200501	0.0288376	6.56897e-10	3.72812e-06	0.000107447	FALSE
Glu-DL	ENSG00000296116		16	rs28589956	25344614	A	G	0.645522	0.340847	0.0617064	3.47586e-07	0.000516378	0.00784673	FALSE
Glu-DL	ENSG00000176476	SGF29	16	rs151321	28544269	C	T	0.559702	0.156162	0.0259683	4.28322e-08	2.47064e-05	0.000568551	FALSE
Glu-DL	ENSG00000196993	NPIPB9	16	rs2411440	28642202	C	T	0.421642	-0.387553	0.0758411	1.91915e-06	0.000862999	0.0120593	FALSE
Glu-DL	ENSG00000169203	NPIPB12	16	rs111359561	29576837	G	A	0.380597	-0.534547	0.0613753	1.92128e-13	1.71091e-09	1.05194e-07	FALSE
Glu-DL	ENSG00000275857		16	rs571146235	29593823	G	T	0.0447761	0.526037	0.0998294	1.00094e-06	0.000568194	0.00851994	FALSE
Glu-DL	ENSG00000169592	INO80E	16	rs8054556	29946895	G	A	0.41791	-0.211814	0.0385951	4.03521e-07	0.000257931	0.00436785	FALSE
Glu-DL	ENSG00000196118	CFAP119	16	rs72793342	30537031	G	A	0.197761	-0.312237	0.0673362	1.25186e-05	0.00252526	0.0289934	FALSE
Glu-DL	ENSG00000262950		16	rs2967291	49133118	G	A	0.291045	0.317213	0.0615237	1.59253e-06	0.00163174	0.0203788	FALSE
Glu-DL	ENSG00000155393	HEATR3	16	rs2058815	50024308	T	G	0.690298	0.16978	0.0339924	3.05774e-06	0.00415446	0.0426452	FALSE
Glu-DL	ENSG00000103479	RBL2	16	rs8056923	53403289	A	G	0.544776	-0.125597	0.0195575	7.12496e-09	1.09502e-05	0.000283557	FALSE
Glu-DL	ENSG00000303989		16	rs12447191	62165395	G	T	0.156716	0.542096	0.101943	8.20208e-07	0.000576246	0.00861132	FALSE
Glu-DL	ENSG00000089505	CMTM1	16	rs764946	66236441	C	G	0.160448	-0.32818	0.0645495	2.13155e-06	0.00153291	0.0194617	FALSE
Glu-DL	ENSG00000305455		16	rs12932078	69934824	A	G	0.735075	-0.479824	0.0532781	4.78397e-14	5.79244e-10	3.94591e-08	FALSE
Glu-DL	ENSG00000290890	PDPR2P	16	rs79469322	74694462	A	G	0.0559702	-0.497104	0.0903755	3.83217e-07	0.000406727	0.00635779	FALSE
Glu-DL	ENSG00000304089		16	rs13336493	74538674	T	C	0.298507	-0.356432	0.071193	2.91486e-06	0.00234846	0.0272837	FALSE
Glu-DL	ENSG00000065457	ADAT1	16	rs59343208	75552965	G	A	0.33209	0.191121	0.0392605	5.06699e-06	0.00306302	0.0336	FALSE
Glu-DL	ENSG00000186153	WWOX	16	rs36017005	78128196	T	G	0.149254	-0.243323	0.0306032	6.64863e-12	8.06701e-08	3.54282e-06	FALSE
Glu-DL	ENSG00000135698	MPHOSPH6	16	rs12448920	82161017	T	A	0.608209	0.182386	0.0228691	5.9377e-12	7.03493e-06	0.000189593	FALSE
Glu-DL	ENSG00000103168	TAF1C	16	rs4489992	84173237	C	G	0.492537	-0.222269	0.0379394	8.37023e-08	0.000334653	0.00541471	FALSE
Glu-DL	ENSG00000305404		16	rs396491	84490621	G	C	0.402985	0.348648	0.0617165	2.04659e-07	0.000784255	0.0111144	FALSE
Glu-DL	ENSG00000104731	KLHDC4	16	rs9934565	87730661	A	T	0.473881	0.370309	0.0260838	2.93201e-24	5.85836e-19	2.34128e-16	FALSE
Glu-DL	ENSG00000129993	CBFA2T3	16	rs871756	88902668	G	C	0.320896	-0.130437	0.0259244	2.63722e-06	0.00373862	0.0390793	FALSE
Glu-DL	ENSG00000185324	CDK10	16	rs258340	89624976	C	G	0.5	0.148135	0.0285871	1.43266e-06	0.00176251	0.0217851	FALSE
Glu-DL	ENSG00000158805	ZNF276	16	rs4785708	89730161	C	T	0.41791	-0.157708	0.0287911	4.21598e-07	0.000598925	0.00887611	FALSE
Glu-DL	ENSG00000075399	VPS9D1	16	rs62068372	89718699	T	C	0.186567	0.177103	0.0350783	2.45918e-06	0.00252679	0.0289934	FALSE
Glu-DL	ENSG00000141013	GAS8	16	rs77603042	90016831	A	G	0.0858209	0.558559	0.047144	9.12325e-20	5.49991e-14	8.24261e-12	FALSE
Glu-DL	ENSG00000187624	LIAT1	17	rs11150881	409513	A	G	0.246269	0.80091	0.0676622	9.59128e-20	3.51761e-15	6.1122e-13	TRUE
Glu-DL	ENSG00000141252	VPS53	17	rs11652657	535884	A	G	0.477612	-0.105504	0.0134735	1.16345e-11	7.75114e-08	3.41661e-06	FALSE
Glu-DL	ENSG00000167711	SERPINF2	17	rs73292928	1743858	G	A	0.212687	0.489889	0.0832079	7.38797e-08	0.000129706	0.00239984	FALSE
Glu-DL	ENSG00000108963	DPH1	17	rs2273981	2030087	G	A	0.708955	-0.197548	0.035016	2.11302e-07	0.000271482	0.00453964	TRUE
Glu-DL	ENSG00000167720	SRR	17	rs111335664	2339527	A	G	0.33209	-0.246694	0.0407671	3.63518e-08	6.49493e-05	0.00130655	FALSE
Glu-DL	ENSG00000196689	TRPV1	17	rs17634022	3605864	G	C	0.25	0.151822	0.0280057	5.33871e-07	0.000568224	0.00851994	FALSE
Glu-DL	ENSG00000129204	USP6	17	rs143649705	5250721	G	A	0.0820896	2.97964	0.247853	4.1556e-20	2.26113e-13	3.04603e-11	FALSE
Glu-DL	ENSG00000167840	ZNF232	17	rs143649705	5250721	G	A	0.0820896	1.14381	0.120814	5.49653e-15	6.19805e-11	5.46405e-09	FALSE
Glu-DL	ENSG00000256806	C17orf100	17	rs7226265	6652703	A	G	0.19403	0.76752	0.0721849	2.40035e-17	3.4227e-13	4.4125e-11	FALSE
Glu-DL	ENSG00000267532	MIR497HG	17	rs7225756	6990372	G	A	0.458955	0.127594	0.0224744	1.81621e-07	0.00029676	0.00489463	FALSE
Glu-DL	ENSG00000174282	ZBTB4	17	rs55894190	7479919	C	T	0.63806	0.105344	0.0193002	4.57317e-07	0.000572035	0.00856226	TRUE
Glu-DL	ENSG00000183914	DNAH2	17	rs839721	7736431	G	A	0.544776	0.246967	0.046849	9.91972e-07	0.000970673	0.0132549	FALSE
Glu-DL	ENSG00000109047	RCVRN	17	rs4668	9911106	T	C	0.645522	-0.706002	0.0652722	1.02654e-17	9.51043e-14	1.35744e-11	FALSE
Glu-DL	ENSG00000170222	ADPRM	17	rs56121112	10674256	A	C	0.488806	-0.31136	0.0630599	3.84314e-06	0.0033531	0.0360554	FALSE
Glu-DL	ENSG00000188803	SHISA6	17	rs12603807	11330584	T	C	0.25	0.219063	0.044492	4.06164e-06	0.00352427	0.0373929	TRUE
Glu-DL	ENSG00000266667		17	rs200768112	15540420	A	G	0.350746	-0.393486	0.050709	1.61577e-11	1.23671e-07	5.25796e-06	FALSE
Glu-DL	ENSG00000175106	TVP23C	17	rs143003089	15546581	C	G	0.0932836	-0.165205	0.0256471	6.53202e-09	1.27262e-05	0.000324639	FALSE
Glu-DL	ENSG00000214946	TBC1D26	17	rs163369	15665794	C	T	0.742537	0.516144	0.0775669	2.52709e-09	3.13082e-06	9.31434e-05	FALSE
Glu-DL	ENSG00000308416		17	rs7223313	16404937	G	A	0.182836	-0.407565	0.0714123	1.59944e-07	8.53892e-05	0.00166196	FALSE
Glu-DL	ENSG00000175061	SNHG29	17	rs12602853	16446409	G	A	0.402985	-0.132769	0.0227671	9.39619e-08	7.67012e-05	0.00150755	FALSE
Glu-DL	ENSG00000181350	LRRC75A	17	rs941411	16453772	T	A	0.294776	-0.192867	0.0294715	4.13391e-09	3.67248e-05	0.00081238	FALSE
Glu-DL	ENSG00000176974	SHMT1	17	rs4924750	18357439	C	G	0.287313	0.226555	0.0466835	5.37735e-06	0.00334189	0.0359995	FALSE
Glu-DL	ENSG00000273018	FAM106A	17	rs7225478	18619976	C	T	0.451493	1.25103	0.13159	4.56844e-15	7.14363e-11	6.20638e-09	FALSE
Glu-DL	ENSG00000273018	FAM106A	17	rs7225478	18619976	C	T	0.451493	1.25103	0.13159	4.56844e-15	7.14363e-11	6.20638e-09	FALSE
Glu-DL	ENSG00000304681		17	rs12939559	19463306	T	A	0.652985	-0.307686	0.0477902	6.62581e-09	5.78317e-06	0.00015903	TRUE
Glu-DL	ENSG00000266202		17	rs55820404	27934477	A	G	0.190299	0.471504	0.0820315	1.34504e-07	9.65808e-05	0.00184976	FALSE
Glu-DL	ENSG00000301334		17	rs9897022	28227749	C	T	0.227612	-0.721261	0.0494999	5.99583e-25	1.65738e-19	7.6427e-17	TRUE
Glu-DL	ENSG00000196535	MYO18A	17	rs546957695	28734613	G	A	0.0708955	-0.155219	0.0312979	3.52131e-06	0.00127852	0.0166617	FALSE
Glu-DL	ENSG00000176927	EFCAB5	17	rs3936006	29930642	A	G	0.529851	0.202699	0.0284117	2.87412e-10	2.10937e-07	8.40799e-06	TRUE
Glu-DL	ENSG00000108587	GOSR1	17	rs8067576	30117236	T	A	0.470149	-0.100886	0.0218303	1.3297e-05	0.00463874	0.0464627	TRUE
Glu-DL	ENSG00000214719		17	rs73269987	30790678	A	G	0.130597	0.227594	0.0371788	2.67501e-08	2.21608e-05	0.00052097	TRUE
Glu-DL	ENSG00000290928		17	rs216462	30568879	T	C	0.902985	0.117376	0.0204897	1.46064e-07	7.98578e-05	0.00156446	FALSE
Glu-DL	ENSG00000263603		17	rs75820649	30799402	C	T	0.0970149	-0.545298	0.0601293	3.56482e-14	2.5256e-10	1.89253e-08	FALSE
Glu-DL	ENSG00000176208	ATAD5	17	rs216454	30561716	T	G	0.623134	-0.1074	0.0222552	5.98697e-06	0.00138532	0.0178594	FALSE
Glu-DL	ENSG00000184060	ADAP2	17	rs3764420	30837136	A	G	0.0858209	0.594724	0.100562	6.59074e-08	3.33504e-05	0.00074322	FALSE
Glu-DL	ENSG00000141314	RHBDL3	17	rs12451338	32264510	G	A	0.447761	0.258862	0.0397012	4.60021e-09	4.71702e-06	0.000132757	TRUE
Glu-DL	ENSG00000274767		17	rs8072769	36464461	C	T	0.130597	-0.816682	0.155655	1.09846e-06	0.000556627	0.00838396	TRUE
Glu-DL	ENSG00000274512	TBC1D3L	17	rs9905265	38313511	C	G	0.809702	0.704988	0.131134	6.43887e-07	0.000462327	0.00712473	FALSE
Glu-DL	ENSG00000274512	TBC1D3L	17	rs9905265	38313511	C	G	0.809702	0.704988	0.131134	6.43887e-07	0.000462327	0.00712473	FALSE
Glu-DL	ENSG00000173801	JUP	17	rs4796702	41786667	T	C	0.664179	0.167353	0.0224009	6.14155e-11	1.31286e-07	5.56199e-06	TRUE
Glu-DL	ENSG00000198496	NBR2	17	rs8176215	43073766	A	T	0.455224	0.170257	0.0298446	1.61608e-07	0.000182877	0.00319619	FALSE
Glu-DL	ENSG00000067596	DHX8	17	rs9910994	43456462	A	T	0.253731	-0.146734	0.0271703	5.81635e-07	0.00186742	0.0227533	FALSE
Glu-DL	ENSG00000108852	MPP2	17	rs231519	43883683	T	C	0.891791	0.270968	0.0414802	4.356e-09	2.62509e-05	0.000600637	FALSE
Glu-DL	ENSG00000161692	DBF4B	17	rs11656000	44665157	T	C	0.16791	-0.392801	0.0611987	7.23567e-09	1.44122e-05	0.000359987	FALSE
Glu-DL	ENSG00000182963	GJC1	17	rs2586579	44839819	A	G	0.313433	0.259096	0.0335437	1.90503e-11	9.40959e-08	4.07277e-06	FALSE
Glu-DL	ENSG00000294432		17	rs7216522	45031337	A	G	0.421642	0.705783	0.0606486	2.37559e-19	2.24715e-14	3.54501e-12	FALSE
Glu-DL	ENSG00000267198		17	rs62063286	45964621	T	C	0.208955	0.62481	0.0728005	3.48258e-13	2.47426e-09	1.47587e-07	FALSE
Glu-DL	ENSG00000291175		17	rs242561	45949182	T	C	0.787313	0.402945	0.044922	5.66796e-14	1.00679e-09	6.48968e-08	TRUE
Glu-DL	ENSG00000285668		17	rs55974014	45680084	C	A	0.19403	1.55788	0.0823564	2.14915e-32	5.50598e-25	6.60136e-22	FALSE
Glu-DL	ENSG00000120071	KANSL1	17	rs28416808	45943852	C	T	0.212687	0.621475	0.0425288	5.02081e-25	1.86881e-19	8.2985e-17	FALSE
Glu-DL	ENSG00000305133		17	rs28439143	45910357	G	A	0.205224	3.89507	0.168758	1.30055e-38	1.51718e-30	9.09507e-27	FALSE
Glu-DL	ENSG00000305150		17	rs62061733	45941033	A	G	0.216418	0.954432	0.106347	5.54205e-14	3.79504e-10	2.7576e-08	TRUE
Glu-DL	ENSG00000305169		17	rs7210219	45941153	T	C	0.220149	1.06063	0.0962551	4.0315e-18	9.02077e-14	1.30306e-11	FALSE
Glu-DL	ENSG00000176681	LRRC37A	17	rs62054804	45837443	C	T	0.212687	0.921886	0.06895	1.03925e-22	9.03671e-18	2.92824e-15	FALSE
Glu-DL	ENSG00000228696	ARL17B	17	rs199516	46779119	C	T	0.802239	-1.9854	0.146836	5.38577e-23	3.58793e-18	1.22906e-15	FALSE
Glu-DL	ENSG00000228696	ARL17B	17	rs199516	46779119	C	T	0.802239	-1.9854	0.146836	5.38577e-23	3.58793e-18	1.22906e-15	FALSE
Glu-DL	ENSG00000228696	ARL17B	17	rs199516	46779119	C	T	0.802239	-1.9854	0.146836	5.38577e-23	3.58793e-18	1.22906e-15	FALSE
Glu-DL	ENSG00000260075	NSFP1	17	rs17698176	46742229	T	G	0.190299	1.12026	0.170785	3.86074e-09	2.35359e-06	7.09001e-05	FALSE
Glu-DL	ENSG00000238083	LRRC37A2	17	rs1819040	46142465	T	A	0.212687	1.06053	0.0739951	1.64604e-24	2.74616e-19	1.17589e-16	FALSE
Glu-DL	ENSG00000238083	LRRC37A2	17	rs1819040	46142465	T	A	0.212687	1.06053	0.0739951	1.64604e-24	2.74616e-19	1.17589e-16	FALSE
Glu-DL	ENSG00000073969	NSF	17	rs17698176	46742229	T	G	0.190299	0.220687	0.0444607	3.46248e-06	0.000974568	0.013293	FALSE
Glu-DL	ENSG00000262633		17	rs199528	46765770	C	T	0.186567	0.476422	0.0577815	1.68627e-12	5.99928e-09	3.36112e-07	FALSE
Glu-DL	ENSG00000259753		17	rs2056132	47256030	C	G	0.134328	-0.345606	0.0615817	2.39403e-07	0.000221747	0.00379803	FALSE
Glu-DL	ENSG00000178852	EFCAB13	17	rs3809863	47307646	C	T	0.41791	0.289781	0.0320853	4.24372e-14	5.46363e-10	3.78646e-08	FALSE
Glu-DL	ENSG00000253347		17	rs11079778	47545048	C	T	0.473881	0.179963	0.0354314	2.17481e-06	0.00259994	0.0296875	FALSE
Glu-DL	ENSG00000005884	ITGA3	17	rs2269771	50088006	A	C	0.873134	-0.175838	0.0337496	1.2767e-06	0.00137506	0.0177652	FALSE
Glu-DL	ENSG00000108423	TUBD1	17	rs72838873	59848696	G	A	0.145522	-0.224385	0.0479588	1.06505e-05	0.00503779	0.049212	FALSE
Glu-DL	ENSG00000008283	CYB561	17	rs111390602	62953479	A	G	0.309702	-0.23687	0.047537	3.20592e-06	0.000913127	0.0126419	FALSE
Glu-DL	ENSG00000279369		17	rs77374012	64088753	G	A	0.0522388	-0.479162	0.103153	1.21294e-05	0.00364457	0.03836	FALSE
Glu-DL	ENSG00000303765		17	rs41410147	64966066	C	T	0.0708955	1.17387	0.162247	1.81367e-10	4.18287e-07	1.53365e-05	TRUE
Glu-DL	ENSG00000168646	AXIN2	17	rs57360431	65999302	C	T	0.514925	-0.352202	0.0316354	2.38321e-18	5.86393e-14	8.67965e-12	FALSE
Glu-DL	ENSG00000266076		17	rs7222224	65999480	C	T	0.511194	-0.181564	0.0337968	6.5429e-07	0.00105175	0.0140892	FALSE
Glu-DL	ENSG00000154240	CEP112	17	rs12946940	65943881	T	C	0.425373	0.151368	0.0211471	2.58182e-10	6.26319e-07	2.15782e-05	FALSE
Glu-DL	ENSG00000196704	AMZ2	17	rs12451195	68208494	C	A	0.298507	0.324939	0.0381771	4.85905e-13	3.92477e-09	2.25147e-07	FALSE
Glu-DL	ENSG00000070540	WIPI1	17	rs888298	68448194	A	G	0.511194	-0.542458	0.0629512	2.96145e-13	1.4623e-09	9.0372e-08	FALSE
Glu-DL	ENSG00000141576	RNF157	17	rs8068624	76220658	T	A	0.358209	-0.126318	0.0231911	4.79546e-07	0.000472359	0.00726066	FALSE
Glu-DL	ENSG00000163597	SNHG16	17	rs4647887	76562724	A	G	0.38806	-0.339397	0.0421101	4.00538e-12	1.35684e-07	5.72807e-06	FALSE
Glu-DL	ENSG00000267065	LINC02080	17	rs62086057	76823146	A	G	0.0485075	0.847772	0.135214	1.39594e-08	3.52079e-05	0.000783159	FALSE
Glu-DL	ENSG00000167889	MGAT5B	17	rs12946881	76923130	C	T	0.488806	-0.0953734	0.0188913	2.46161e-06	0.00305947	0.0336	FALSE
Glu-DL	ENSG00000129657	SEC14L1	17	rs2945534	77082170	T	C	0.186567	0.136437	0.0262099	1.30056e-06	0.0035925	0.0380495	FALSE
Glu-DL	ENSG00000167280	ENGASE	17	rs73408686	79061551	T	C	0.365672	-0.345121	0.0658044	1.1079e-06	0.00162191	0.0203044	FALSE
Glu-DL	ENSG00000141519	CCDC40	17	rs3752042	80036614	C	A	0.126866	0.353613	0.0377609	8.90773e-15	1.64739e-10	1.31675e-08	TRUE
Glu-DL	ENSG00000171298	GAA	17	rs12450199	80102793	A	C	0.36194	-0.326134	0.0403666	3.65659e-12	2.91723e-08	1.42179e-06	FALSE
Glu-DL	ENSG00000173821	RNF213	17	rs62074445	80277897	C	T	0.16791	0.979387	0.105114	1.11109e-14	1.96437e-10	1.52933e-08	TRUE
Glu-DL	ENSG00000176108	CHMP6	17	rs8077507	81439757	G	A	0.238806	-0.230719	0.0469547	4.22667e-06	0.00495538	0.0487714	FALSE
Glu-DL	ENSG00000167363	FN3K	17	rs7217361	82752739	C	T	0.384328	-0.215266	0.0376522	1.53261e-07	0.000338565	0.00546327	TRUE
Glu-DL	ENSG00000175711	B3GNTL1	17	rs57923322	83051760	T	G	0.238806	-0.225465	0.047446	8.00158e-06	0.00487508	0.0483053	TRUE
Glu-DL	ENSG00000175711	B3GNTL1	17	rs57923322	83051760	T	G	0.238806	-0.225465	0.047446	8.00158e-06	0.00487508	0.0483053	TRUE
Glu-DL	ENSG00000168461	RAB31	18	rs78125864	9728163	T	C	0.104478	0.487229	0.0800027	3.0688e-08	5.2868e-05	0.00110236	FALSE
Glu-DL	ENSG00000154889	MPPE1	18	rs8097892	11905954	C	T	0.440298	-0.321004	0.0446539	2.24226e-10	1.65081e-06	5.2085e-05	FALSE
Glu-DL	ENSG00000267079		18	rs629550	11947185	A	C	0.447761	0.512794	0.0558047	2.02757e-14	8.33993e-10	5.49401e-08	TRUE
Glu-DL	ENSG00000267199		18	rs59992891	12440859	G	C	0.41791	-0.369261	0.0477532	1.83103e-11	6.73661e-08	3.00253e-06	FALSE
Glu-DL	ENSG00000134490	TMEM241	18	rs34799311	23427766	A	G	0.339552	0.125111	0.0215565	1.05839e-07	0.000343503	0.00552806	FALSE
Glu-DL	ENSG00000134775	FHOD3	18	rs56273536	36286623	C	A	0.384328	-0.0729926	0.0124526	8.25907e-08	0.000116544	0.0021867	FALSE
Glu-DL	ENSG00000134779	TPGS2	18	rs7226408	36791898	C	T	0.13806	0.271574	0.0452603	4.53761e-08	7.27399e-05	0.00143675	FALSE
Glu-DL	ENSG00000266957		18	rs62095427	47067850	G	A	0.0783582	0.54176	0.102433	9.23492e-07	0.000634873	0.00932814	FALSE
Glu-DL	ENSG00000167306	MYO5B	18	rs1790426	50121273	A	G	0.578358	0.127395	0.0246137	1.46887e-06	0.00135942	0.0175822	FALSE
Glu-DL	ENSG00000172175	MALT1	18	rs11152091	58731242	C	T	0.511194	0.144152	0.0240448	4.63981e-08	7.65543e-05	0.00150713	FALSE
Glu-DL	ENSG00000183287	CCBE1	18	rs4940888	59527864	G	T	0.283582	-0.232509	0.0451075	1.60159e-06	0.00213346	0.025376	FALSE
Glu-DL	ENSG00000297062		18	rs2366387	70494429	C	G	0.179104	0.380142	0.0666183	1.60585e-07	0.000224744	0.00384386	FALSE
Glu-DL	ENSG00000263655		18	rs7243038	74108019	G	A	0.13806	0.788981	0.115832	1.24534e-09	4.21205e-06	0.000119953	FALSE
Glu-DL	ENSG00000141665	FBXO15	18	rs1986529	74142451	G	T	0.141791	0.364951	0.0661435	3.56645e-07	0.000895487	0.012412	FALSE
Glu-DL	ENSG00000267127		18	rs6506799	80064971	G	A	0.708955	-0.383485	0.0386429	6.50015e-16	9.91052e-12	1.03323e-09	FALSE
Glu-DL	ENSG00000099822	HCN2	19	rs150088366	627431	C	G	0.0597015	0.460829	0.0878833	1.11247e-06	0.00192075	0.023341	FALSE
Glu-DL	ENSG00000160953	PWWP3A	19	rs34885619	1386890	C	T	0.619403	-0.130704	0.0231407	2.05472e-07	0.000365576	0.00582078	FALSE
Glu-DL	ENSG00000115266	APC2	19	rs2656877	1458918	G	A	0.563433	0.193567	0.0287626	1.79891e-09	5.97153e-06	0.000163237	FALSE
Glu-DL	ENSG00000074842	MYDGF	19	rs73920108	4660894	C	T	0.0597015	-0.482898	0.091673	1.00815e-06	0.00157892	0.0198848	TRUE
Glu-DL	ENSG00000223573	TINCR	19	rs274787	5912630	C	G	0.264925	0.319572	0.0603531	9.00435e-07	0.00134853	0.017479	FALSE
Glu-DL	ENSG00000076944	STXBP2	19	rs56262542	7632901	T	C	0.317164	0.3052	0.0607194	2.69132e-06	0.00335158	0.0360554	FALSE
Glu-DL	ENSG00000181029	TRAPPC5	19	rs7260586	7494700	T	C	0.548507	-0.248727	0.0463251	6.62648e-07	0.00102874	0.0138273	TRUE
Glu-DL	ENSG00000290088		19	rs4804820	7792062	T	C	0.649254	0.384922	0.0763983	2.56471e-06	0.00317536	0.0345179	FALSE
Glu-DL	ENSG00000142459	EVI5L	19	rs12972592	7876710	T	C	0.380597	0.119388	0.0158192	4.32107e-11	1.83176e-07	7.44465e-06	FALSE
Glu-DL	ENSG00000186994	KANK3	19	rs2927706	8312067	G	A	0.208955	0.607774	0.0737099	1.68427e-12	1.26885e-08	6.73133e-07	FALSE
Glu-DL	ENSG00000188000	OR7D2	19	rs73494602	9153725	G	A	0.0597015	0.736127	0.120301	2.7052e-08	3.61204e-05	0.00080181	FALSE
Glu-DL	ENSG00000188321	ZNF559	19	rs28384491	9324196	C	T	0.0895522	-0.390217	0.039625	9.27393e-16	1.58119e-11	1.54127e-09	TRUE
Glu-DL	ENSG00000174652	ZNF266	19	rs12150880	9306249	A	G	0.507463	0.179108	0.030018	5.2485e-08	5.87707e-05	0.00120374	FALSE
Glu-DL	ENSG00000287275		19	rs11086035	9435784	C	T	0.477612	-0.91473	0.0657931	1.03222e-23	7.55295e-19	2.84833e-16	TRUE
Glu-DL	ENSG00000196605	ZNF846	19	rs7256212	9604755	T	C	0.13806	-0.263855	0.0390721	1.62039e-09	3.42881e-06	0.000100512	FALSE
Glu-DL	ENSG00000196605	ZNF846	19	rs7256212	9604755	T	C	0.13806	-0.263855	0.0390721	1.62039e-09	3.42881e-06	0.000100512	FALSE
Glu-DL	ENSG00000142453	CARM1	19	rs4804505	10478746	T	G	0.0708955	0.190505	0.0401458	8.21393e-06	0.00491281	0.0485398	TRUE
Glu-DL	ENSG00000187266	EPOR	19	rs10413313	11740267	G	C	0.0559702	0.730393	0.137731	8.71161e-07	0.000930337	0.0127915	FALSE
Glu-DL	ENSG00000198429	ZNF69	19	rs4804175	11947721	C	T	0.440298	0.137457	0.0187918	1.25876e-10	2.28879e-07	8.93852e-06	FALSE
Glu-DL	ENSG00000197054	ZNF763	19	rs279260	11946276	T	C	0.11194	-0.480596	0.0932854	1.61912e-06	0.00210126	0.0251175	FALSE
Glu-DL	ENSG00000198342	ZNF442	19	rs279217	11877508	A	C	0.0597015	0.901659	0.182689	3.87453e-06	0.00135148	0.0174984	FALSE
Glu-DL	ENSG00000269755		19	rs2861419	12491203	C	G	0.503731	-0.319264	0.0367201	2.06079e-13	5.5923e-10	3.83134e-08	FALSE
Glu-DL	ENSG00000269693		19	rs4804721	12580032	G	A	0.563433	-0.208946	0.0242984	3.22093e-13	2.15245e-09	1.29682e-07	FALSE
Glu-DL	ENSG00000188033	ZNF490	19	rs4804721	12580032	G	A	0.563433	-0.166627	0.0287325	1.07962e-07	0.000128958	0.0023897	FALSE
Glu-DL	ENSG00000130475	FCHO1	19	rs36088365	17611050	C	T	0.0932836	-0.148124	0.0297082	3.16596e-06	0.00317557	0.0345179	FALSE
Glu-DL	ENSG00000130518	IQCN	19	rs10854164	18273520	T	C	0.391791	-0.33569	0.0472922	3.38946e-10	8.73918e-07	2.92675e-05	FALSE
Glu-DL	ENSG00000130517	PGPEP1	19	rs6512259	18336878	G	C	0.242537	-0.226255	0.0345953	4.21136e-09	1.88147e-05	0.000452968	FALSE
Glu-DL	ENSG00000294647		19	rs113980591	19454548	G	A	0.145522	0.831692	0.0951997	1.69442e-13	1.22747e-09	7.78661e-08	FALSE
Glu-DL	ENSG00000105717	PBX4	19	rs1529714	19682675	G	A	0.738806	0.10184	0.0212731	6.96808e-06	0.0030917	0.0338518	FALSE
Glu-DL	ENSG00000105708	ZNF14	19	rs56129543	19709666	G	C	0.339552	-0.196223	0.0277308	3.75016e-10	6.57051e-07	2.24435e-05	FALSE
Glu-DL	ENSG00000256771	ZNF253	19	rs55816500	19947630	A	T	0.253731	-0.146677	0.0274221	7.20863e-07	0.000704129	0.0101712	FALSE
Glu-DL	ENSG00000296159		19	rs247783	19756585	T	C	0.41791	0.271857	0.0580396	1.04338e-05	0.00441549	0.0446367	FALSE
Glu-DL	ENSG00000184635	ZNF93	19	rs7253407	19871222	C	T	0.298507	0.188809	0.0384271	4.23047e-06	0.00377631	0.0393703	FALSE
Glu-DL	ENSG00000291130		19	rs2545967	20412112	C	T	0.455224	-0.244876	0.0419016	8.90755e-08	9.3741e-05	0.00180692	FALSE
Glu-DL	ENSG00000269110		19	rs612578	20661070	A	G	0.246269	0.217039	0.0328492	3.12027e-09	7.2672e-06	0.000195358	TRUE
Glu-DL	ENSG00000182141	ZNF708	19	rs17680671	21393761	G	C	0.477612	0.171635	0.0217365	8.57508e-12	3.58594e-08	1.7336e-06	FALSE
Glu-DL	ENSG00000172687	ZNF738	19	rs2937157	21378003	G	A	0.958955	-0.619625	0.0826039	5.33956e-11	2.66514e-07	1.02415e-05	FALSE
Glu-DL	ENSG00000269237		19	rs4621113	21423627	G	T	0.477612	-0.472919	0.0367557	9.51631e-22	2.13165e-16	4.82213e-14	FALSE
Glu-DL	ENSG00000197013	ZNF429	19	rs1879235	21521785	A	G	0.212687	0.342401	0.044731	2.62788e-11	1.4782e-07	6.13246e-06	FALSE
Glu-DL	ENSG00000304629		19	rs10406870	21539485	A	G	0.220149	0.522395	0.0932213	2.47995e-07	0.000278297	0.00462777	FALSE
Glu-DL	ENSG00000268081		19	rs12985995	21540234	C	T	0.522388	-1.36546	0.124394	4.8926e-18	4.16078e-13	5.1964e-11	FALSE
Glu-DL	ENSG00000197134	ZNF257	19	rs12460058	22101729	G	A	0.152985	0.685323	0.10759	8.97821e-09	1.60356e-05	0.000394779	FALSE
Glu-DL	ENSG00000197360	ZNF98	19	rs1391581	22532455	T	G	0.541045	-0.706653	0.098549	2.436e-10	4.98539e-07	1.77365e-05	TRUE
Glu-DL	ENSG00000269416	LINC01224	19	rs684580	23457151	T	C	0.335821	0.386415	0.0690381	2.55092e-07	0.000176615	0.00310485	FALSE
Glu-DL	ENSG00000267575	LINC02987	19	rs759045	27765442	T	A	0.817164	0.344502	0.0461901	6.50431e-11	1.99192e-07	8.04109e-06	FALSE
Glu-DL	ENSG00000021488	SLC7A9	19	rs2287879	32858582	T	C	0.63806	0.420425	0.0641935	4.04025e-09	1.57117e-05	0.000388893	FALSE
Glu-DL	ENSG00000205209	SCGB2B2	19	rs73040297	34636493	A	G	0.19403	-0.154152	0.0308162	2.96499e-06	0.00221554	0.0260678	FALSE
Glu-DL	ENSG00000153902	LGI4	19	rs1688002	35136564	C	G	0.354478	-0.560163	0.0479885	2.02008e-19	5.24081e-15	8.8499e-13	FALSE
Glu-DL	ENSG00000307882		19	rs231237	35758620	G	A	0.406716	0.44752	0.0554042	3.68967e-12	1.29802e-08	6.85575e-07	TRUE
Glu-DL	ENSG00000294115		19	rs14100	36149867	T	C	0.932836	-0.450595	0.0862824	1.21415e-06	0.00138448	0.0178594	FALSE
Glu-DL	ENSG00000232677	LINC00665	19	rs58395495	36264416	G	C	0.197761	0.582575	0.0585324	5.67108e-16	1.69998e-11	1.6437e-09	FALSE
Glu-DL	ENSG00000186017	ZNF566	19	rs1227816	36765680	A	G	0.291045	0.125021	0.0256396	4.90772e-06	0.00209453	0.0250865	FALSE
Glu-DL	ENSG00000198453	ZNF568	19	rs1625963	36973734	T	G	0.608209	0.177227	0.0218176	2.98142e-12	1.66561e-08	8.53406e-07	TRUE
Glu-DL	ENSG00000226686	LINC01535	19	rs256744	37364586	A	G	0.563433	-0.242882	0.0391003	1.80223e-08	2.46413e-05	0.000568144	FALSE
Glu-DL	ENSG00000120784	ZFP30	19	rs73039029	37735165	T	C	0.410448	-0.0899133	0.0191931	1.04066e-05	0.0037174	0.038894	FALSE
Glu-DL	ENSG00000099338	CATSPERG	19	rs71354995	38301201	A	G	0.279851	0.129245	0.0252782	1.89736e-06	0.00156446	0.0197442	FALSE
Glu-DL	ENSG00000161243	FBXO27	19	rs57724551	39027075	C	T	0.235075	-0.243314	0.0504798	6.12578e-06	0.00462331	0.0463469	FALSE
Glu-DL	ENSG00000105202	FBL	19	rs45601936	39349979	A	G	0.104478	0.426934	0.0867133	4.06402e-06	0.0027933	0.0314757	FALSE
Glu-DL	ENSG00000197782	ZNF780A	19	rs2569656	40096924	T	C	0.13806	0.343765	0.0698458	4.09233e-06	0.00424915	0.0433573	FALSE
Glu-DL	ENSG00000160460	SPTBN4	19	rs62107867	40561531	T	C	0.179104	-0.0982168	0.0187594	1.1498e-06	0.00101829	0.0137177	FALSE
Glu-DL	ENSG00000159915	ZNF233	19	rs7249559	44320719	C	G	0.69403	0.241235	0.0458853	1.05161e-06	0.00223166	0.0261808	FALSE
Glu-DL	ENSG00000159917	ZNF235	19	rs2722749	44369319	C	T	0.160448	-0.175038	0.0326543	6.87376e-07	0.000781654	0.0111038	FALSE
Glu-DL	ENSG00000186567	CEACAM19	19	rs714948	44662645	A	C	0.902985	-0.314668	0.058862	7.29877e-07	0.000890413	0.0123703	FALSE
Glu-DL	ENSG00000204869	IGFL4	19	rs10413695	46048607	T	G	0.145522	0.454544	0.0824995	3.6868e-07	0.00177603	0.021907	FALSE
Glu-DL	ENSG00000105499	PLA2G4C	19	rs387021	48100380	G	A	0.25	0.306833	0.0615356	3.16227e-06	0.0034366	0.0367555	FALSE
Glu-DL	ENSG00000087074	PPP1R15A	19	rs595051	48875151	A	G	0.339552	0.308694	0.0627236	4.09665e-06	0.00315083	0.0343737	TRUE
Glu-DL	ENSG00000161618	ALDH16A1	19	rs7259560	49461916	A	T	0.365672	0.367391	0.0680187	5.79727e-07	0.000522352	0.00792748	FALSE
Glu-DL	ENSG00000039650	PNKP	19	rs2305917	49888042	C	T	0.309702	0.168352	0.0348445	5.85371e-06	0.00364741	0.03836	FALSE
Glu-DL	ENSG00000301908		19	rs12978973	50022997	A	G	0.268657	0.378592	0.070731	7.09842e-07	0.000927523	0.0127675	FALSE
Glu-DL	ENSG00000261341	SMIM47	19	rs10425724	50792601	C	A	0.391791	0.315837	0.059109	7.37621e-07	0.00123046	0.016123	FALSE
Glu-DL	ENSG00000198633	ZNF534	19	rs162124	52414337	G	A	0.75	-0.297489	0.0517621	1.34858e-07	0.000317265	0.00518939	FALSE
Glu-DL	ENSG00000213020	ZNF611	19	rs10419223	52735218	T	C	0.652985	0.180248	0.0215283	9.29897e-13	8.90716e-09	4.89871e-07	TRUE
Glu-DL	ENSG00000182986	ZNF320	19	rs3810115	52897507	C	A	0.440298	-0.298476	0.0346126	2.87643e-13	5.10052e-08	2.343e-06	TRUE
Glu-DL	ENSG00000160336	ZNF761	19	rs2865700	53426725	A	T	0.522388	-0.314934	0.044073	2.72869e-10	9.94327e-07	3.27512e-05	FALSE
Glu-DL	ENSG00000160336	ZNF761	19	rs2865700	53426725	A	T	0.522388	-0.314934	0.044073	2.72869e-10	9.94327e-07	3.27512e-05	FALSE
Glu-DL	ENSG00000167608	TMC4	19	rs653560	54173409	C	G	0.223881	0.503179	0.0706364	3.02003e-10	1.85941e-06	5.80554e-05	FALSE
Glu-DL	ENSG00000170889	RPS9	19	rs2304523	54207390	G	T	0.231343	-0.350863	0.0512339	1.05441e-09	1.38906e-05	0.000350611	FALSE
Glu-DL	ENSG00000167615	LENG8	19	rs7248412	54450707	G	A	0.358209	0.183566	0.0349263	1.05831e-06	0.00140322	0.018032	FALSE
Glu-DL	ENSG00000022556	NLRP2	19	rs514148	54963134	A	G	0.455224	0.768923	0.114564	1.95125e-09	4.87212e-06	0.000136801	FALSE
Glu-DL	ENSG00000129990	SYT5	19	rs11671059	55186815	T	C	0.164179	0.290803	0.0469258	1.92213e-08	5.18254e-05	0.00108629	FALSE
Glu-DL	ENSG00000286125		19	rs7255276	56747548	C	T	0.0485075	0.508148	0.0710992	2.71253e-10	1.9171e-06	5.95464e-05	FALSE
Glu-DL	ENSG00000306458		19	rs740400	57175436	C	T	0.123134	0.462255	0.0731085	1.10483e-08	2.07652e-05	0.000491052	FALSE
Glu-DL	ENSG00000083828	ZNF586	19	rs8104937	57798962	T	A	0.44403	-0.13682	0.0176646	1.72612e-11	6.67905e-08	2.98798e-06	FALSE
Glu-DL	ENSG00000176293	ZNF135	19	rs1544888	58059544	T	G	0.291045	0.152599	0.0314074	5.25733e-06	0.00384351	0.0398974	TRUE
Glu-DL	ENSG00000121413	ZSCAN18	19	rs295350	58085558	G	A	0.753731	0.171976	0.0348253	3.83216e-06	0.00301949	0.0333967	FALSE
Glu-DL	ENSG00000198131	ZNF544	19	rs171851	58247534	A	G	0.156716	-0.189945	0.0199852	4.62811e-15	7.6643e-11	6.51706e-09	FALSE
Glu-DL	ENSG00000268912		19	rs7409473	58427798	A	G	0.503731	-0.433924	0.0613141	3.73242e-10	5.67851e-07	1.9907e-05	FALSE
Glu-DL	ENSG00000035115	SH3YL1	2	rs59954796	494962	A	G	0.182836	-0.121215	0.0246182	4.05936e-06	0.00316452	0.0344603	FALSE
Glu-DL	ENSG00000223751		2	rs6725467	733622	G	A	0.242537	0.647791	0.0709421	2.65915e-14	3.8295e-10	2.76588e-08	FALSE
Glu-DL	ENSG00000227713		2	rs4854287	869815	T	C	0.470149	0.876969	0.0937426	9.31161e-15	1.2058e-10	9.90195e-09	FALSE
Glu-DL	ENSG00000237667	LINC01115	2	rs4854287	869815	T	C	0.470149	1.48355	0.12032	1.03836e-20	1.61521e-15	3.02585e-13	FALSE
Glu-DL	ENSG00000298835		2	rs4854287	869815	T	C	0.470149	1.21122	0.118756	1.79836e-16	5.31421e-12	5.84536e-10	FALSE
Glu-DL	ENSG00000172554	SNTG2	2	rs13402399	1022516	C	G	0.11194	0.45233	0.0894421	2.37669e-06	0.00226533	0.0264682	FALSE
Glu-DL	ENSG00000118004	COLEC11	2	rs2071639	3580793	C	A	0.123134	1.80388	0.0912414	9.72271e-34	8.80402e-28	2.1111e-24	FALSE
Glu-DL	ENSG00000115750	TAF1B	2	rs4668652	9920851	A	G	0.764925	-0.187346	0.025509	1.09897e-10	4.74521e-07	1.69828e-05	FALSE
Glu-DL	ENSG00000271952	LINC01954	2	rs34414864	10839362	G	T	0.369403	0.393214	0.0646964	3.23819e-08	7.47933e-05	0.00147488	FALSE
Glu-DL	ENSG00000151779	NBAS	2	rs4668908	15449166	G	T	0.671642	-0.113777	0.0152241	6.06642e-11	4.32738e-07	1.56865e-05	FALSE
Glu-DL	ENSG00000305536		2	rs703277	19461973	T	C	0.753731	-0.439629	0.0780176	2.17343e-07	0.0002825	0.00469116	TRUE
Glu-DL	ENSG00000173960	UBXN2A	2	rs4665244	23879821	A	G	0.656716	0.116751	0.0203174	1.35372e-07	0.000144343	0.00261418	FALSE
Glu-DL	ENSG00000163026	WDCP	2	rs7422570	23637306	G	A	0.145522	-0.376598	0.0782392	6.28723e-06	0.00333971	0.0359995	TRUE
Glu-DL	ENSG00000219626	FAM228B	2	rs11125393	24053866	T	C	0.268657	0.0755272	0.0146723	1.64763e-06	0.000938982	0.0128956	FALSE
Glu-DL	ENSG00000276087		2	rs34565113	24200207	G	T	0.552239	-0.27963	0.0479619	9.45159e-08	0.000114515	0.002152	FALSE
Glu-DL	ENSG00000186453	FAM228A	2	rs10469924	24193361	G	A	0.320896	0.191827	0.0401182	7.12718e-06	0.00344745	0.036838	FALSE
Glu-DL	ENSG00000138031	ADCY3	2	rs6723610	24839257	C	T	0.432836	-0.0836562	0.0153858	4.99188e-07	0.000374475	0.00593694	FALSE
Glu-DL	ENSG00000189350	TOGARAM2	2	rs74175081	28957257	G	A	0.16791	0.627258	0.0951735	3.35858e-09	1.40218e-05	0.000352439	FALSE
Glu-DL	ENSG00000172954	LCLAT1	2	rs1723175	30444834	C	T	0.231343	0.106049	0.0202473	1.13997e-06	0.00119648	0.0157483	FALSE
Glu-DL	ENSG00000230876	LINC00486	2	rs4952292	32761775	G	A	0.197761	0.234309	0.0396482	6.71466e-08	0.000136405	0.00250063	FALSE
Glu-DL	ENSG00000236854		2	rs6710617	32758900	G	A	0.212687	0.588415	0.0761219	1.85476e-11	2.42295e-07	9.40122e-06	FALSE
Glu-DL	ENSG00000049323	LTBP1	2	rs979050	32926975	T	C	0.544776	-0.212455	0.043196	4.14791e-06	0.00476301	0.0473122	TRUE
Glu-DL	ENSG00000171055	FEZ2	2	rs848605	36546117	G	A	0.33209	0.139442	0.0269081	1.43118e-06	0.00214848	0.02546	FALSE
Glu-DL	ENSG00000115841	RMDN2	2	rs74753841	37925698	C	G	0.242537	0.392207	0.037659	6.60032e-17	3.47894e-12	3.86208e-10	TRUE
Glu-DL	ENSG00000231367	LINC02613	2	rs35789272	38533032	G	T	0.164179	-0.369385	0.0683893	5.80031e-07	0.000652874	0.00956917	FALSE
Glu-DL	ENSG00000143924	EML4	2	rs6718562	42114274	G	C	0.145522	0.166347	0.0334304	3.29609e-06	0.00395728	0.0409281	TRUE
Glu-DL	ENSG00000152527	PLEKHH2	2	rs13387634	43723872	T	A	0.238806	0.444381	0.0819591	5.3195e-07	0.000713507	0.0102572	FALSE
Glu-DL	ENSG00000250565	ATP6V1E2	2	rs60154242	46535061	A	G	0.30597	0.313525	0.055758	2.28695e-07	0.00069536	0.010081	FALSE
Glu-DL	ENSG00000119878	CRIPT	2	rs6544906	46636733	A	C	0.492537	-0.316074	0.0329418	3.02684e-15	3.79934e-11	3.53116e-09	FALSE
Glu-DL	ENSG00000068724	TTC7A	2	rs13432591	46922671	A	G	0.115672	0.120669	0.0245142	4.08175e-06	0.0045736	0.0459638	FALSE
Glu-DL	ENSG00000119888	EPCAM	2	rs72810397	47361900	A	G	0.0708955	0.543719	0.108569	2.89743e-06	0.00360122	0.0381082	FALSE
Glu-DL	ENSG00000095002	MSH2	2	rs77129373	47348110	C	T	0.13806	0.138283	0.0273176	2.3309e-06	0.00271924	0.0308891	FALSE
Glu-DL	ENSG00000170802	FOXN2	2	rs79073127	48346756	G	C	0.156716	0.310737	0.0525067	6.47722e-08	0.000100422	0.00190809	FALSE
Glu-DL	ENSG00000242441	GTF2A1L	2	rs2140551	48595242	G	A	0.496269	0.32546	0.0643584	2.37897e-06	0.00259652	0.0296875	FALSE
Glu-DL	ENSG00000282890		2	rs2140551	48595242	G	A	0.496269	0.422311	0.0654878	6.32611e-09	2.13145e-05	0.000503048	FALSE
Glu-DL	ENSG00000228033		2	rs7561602	53208983	A	G	0.298507	0.352794	0.0675329	1.2057e-06	0.00132273	0.0171818	FALSE
Glu-DL	ENSG00000170634	ACYP2	2	rs11683741	53980411	T	C	0.317164	0.134669	0.0232134	1.07006e-07	0.000255033	0.00432489	FALSE
Glu-DL	ENSG00000290071		2	rs34564471	55149756	T	G	0.514925	0.4069	0.0689097	6.85691e-08	0.000123482	0.00229888	FALSE
Glu-DL	ENSG00000285755		2	rs80225324	58179405	A	G	0.0485075	-0.458247	0.0758014	3.73016e-08	5.14165e-05	0.0010796	FALSE
Glu-DL	ENSG00000237651	C2orf74	2	rs34279970	61145372	A	G	0.373134	0.278356	0.0494895	2.27174e-07	0.000289894	0.00480065	TRUE
Glu-DL	ENSG00000289410		2	rs72819359	61778681	A	C	0.104478	-0.520815	0.105738	4.03193e-06	0.00234372	0.027255	FALSE
Glu-DL	ENSG00000143951	WDPCP	2	rs73934749	63669117	T	C	0.0746269	0.179924	0.0282395	8.91597e-09	1.43825e-05	0.000359987	TRUE
Glu-DL	ENSG00000237638	LINC02245	2	rs13007943	64984288	G	T	0.0783582	0.283954	0.0357969	7.24713e-12	4.16666e-08	1.95906e-06	FALSE
Glu-DL	ENSG00000293332		2	rs7558354	65245682	C	T	0.339552	-0.266789	0.0461073	1.14125e-07	0.000162364	0.00289681	FALSE
Glu-DL	ENSG00000196975	ANXA4	2	rs12474819	69499702	T	A	0.425373	0.273442	0.0500529	4.4812e-07	0.000258406	0.00436974	FALSE
Glu-DL	ENSG00000293615		2	rs55974754	70115246	A	G	0.126866	-0.133667	0.0224567	5.58823e-08	6.01704e-05	0.00122689	FALSE
Glu-DL	ENSG00000303319		2	rs1473228	71589873	A	G	0.664179	0.322936	0.0645149	2.92619e-06	0.00446172	0.0449903	FALSE
Glu-DL	ENSG00000135638	EMX1	2	rs6759733	72989340	G	T	0.294776	0.189935	0.0348231	4.64877e-07	0.000230928	0.0039384	FALSE
Glu-DL	ENSG00000116127	ALMS1	2	rs62153182	73521718	C	G	0.164179	0.129282	0.0211198	2.67814e-08	2.56371e-05	0.000587713	FALSE
Glu-DL	ENSG00000290727	ALMS1P1	2	rs10170849	73520805	G	A	0.294776	0.305619	0.0579847	9.95476e-07	0.00067149	0.00977036	FALSE
Glu-DL	ENSG00000217702		2	rs2421752	74114488	A	G	0.179104	0.533682	0.0710931	5.20227e-11	8.96346e-08	3.89372e-06	FALSE
Glu-DL	ENSG00000309281		2	rs12366	74958729	G	T	0.373134	2.21457	0.118309	4.45626e-32	1.77498e-26	3.04014e-23	TRUE
Glu-DL	ENSG00000303999		2	rs2116045	82088055	G	A	0.738806	0.456932	0.07842	9.59585e-08	8.27664e-05	0.00161616	FALSE
Glu-DL	ENSG00000231781		2	rs1346859	82097849	T	C	0.742537	0.652795	0.0724285	4.63087e-14	4.98571e-10	3.51622e-08	TRUE
Glu-DL	ENSG00000068615	REEP1	2	rs9808316	86197416	C	T	0.473881	0.0952345	0.0128133	7.32649e-11	1.46061e-07	6.08052e-06	FALSE
Glu-DL	ENSG00000288734		2	rs12614739	88154311	C	T	0.134328	0.796336	0.139234	1.51845e-07	9.74342e-05	0.00186313	FALSE
Glu-DL	ENSG00000144026	ZNF514	2	rs3112998	95156702	A	G	0.529851	0.200247	0.0413358	5.56369e-06	0.000493869	0.00755256	FALSE
Glu-DL	ENSG00000233757	ZNF892	2	rs6725821	95232019	T	C	0.764925	0.144551	0.0249265	1.08035e-07	1.57316e-05	0.000388893	FALSE
Glu-DL	ENSG00000135976	ANKRD36	2	rs13009263	97556164	C	T	0.623134	0.194511	0.0198527	1.17173e-15	1.26565e-11	1.26453e-09	FALSE
Glu-DL	ENSG00000277701		2	rs7578377	97127587	G	A	0.712687	0.590902	0.0580729	2.01186e-16	2.3631e-12	2.77767e-10	FALSE
Glu-DL	ENSG00000196912	ANKRD36B	2	rs13009263	97556164	C	T	0.623134	-0.266724	0.0262126	2.00944e-16	2.64796e-12	3.05265e-10	FALSE
Glu-DL	ENSG00000241962		2	rs6728723	99100420	G	A	0.80597	-0.138226	0.0279937	3.83973e-06	0.00165403	0.0205928	FALSE
Glu-DL	ENSG00000135951	TSGA10	2	rs12987548	99095829	C	T	0.570895	0.32075	0.0259562	9.18538e-21	1.25394e-15	2.46459e-13	FALSE
Glu-DL	ENSG00000144218	AFF3	2	rs62147652	99933401	T	A	0.123134	0.135171	0.028629	9.01659e-06	0.00430426	0.0438078	FALSE
Glu-DL	ENSG00000232084	LINC01104	2	rs2871344	100222968	A	G	0.358209	0.327286	0.0618453	9.11763e-07	0.000657463	0.00961294	FALSE
Glu-DL	ENSG00000303047		2	rs17033287	106799307	C	T	0.0783582	-0.540024	0.10996	4.27028e-06	0.00306229	0.0336	FALSE
Glu-DL	ENSG00000309169		2	rs80108490	106887977	T	A	0.119403	-0.696896	0.0928859	5.30139e-11	1.6962e-07	6.91716e-06	FALSE
Glu-DL	ENSG00000115665	SLC5A7	2	rs2433718	107986975	A	G	0.794776	-0.556815	0.0876063	9.54768e-09	2.31143e-05	0.000539158	TRUE
Glu-DL	ENSG00000135968	GCC2	2	rs1474220	108450343	G	T	0.585821	-0.160635	0.0193627	1.32951e-12	1.10535e-08	5.96962e-07	FALSE
Glu-DL	ENSG00000153214	TMEM87B	2	rs4848984	112068501	G	A	0.559702	0.153234	0.0319972	6.92198e-06	0.00337091	0.036182	FALSE
Glu-DL	ENSG00000286904		2	rs10171979	112065743	C	A	0.682836	-0.344073	0.0672248	1.85646e-06	0.00100698	0.0136266	FALSE
Glu-DL	ENSG00000169629	RGPD8	2	rs3961919	112485744	G	A	0.455224	-0.187972	0.036502	1.63392e-06	0.00133779	0.0173586	FALSE
Glu-DL	ENSG00000309398		2	rs6737094	112644140	G	A	0.824627	0.549346	0.0846957	5.35606e-09	1.38003e-05	0.000349066	FALSE
Glu-DL	ENSG00000125618	PAX8	2	rs7421852	113232684	G	A	0.343284	-0.480126	0.0888219	5.69772e-07	0.000437528	0.0067774	FALSE
Glu-DL	ENSG00000136682	ZNG1B	2	rs2592466	113487922	T	C	0.223881	-0.332665	0.0442627	4.99346e-11	6.20663e-07	2.14449e-05	FALSE
Glu-DL	ENSG00000298065		2	rs7575653	117624007	T	C	0.880597	-1.18635	0.155008	2.64205e-11	8.61425e-08	3.75564e-06	FALSE
Glu-DL	ENSG00000297418		2	rs7589375	118085358	T	C	0.235075	0.390173	0.0632144	2.14361e-08	3.01619e-05	0.000679745	FALSE
Glu-DL	ENSG00000136717	BIN1	2	rs36085158	127112406	C	T	0.197761	-0.354363	0.0482327	1.08571e-10	3.6776e-07	1.36509e-05	FALSE
Glu-DL	ENSG00000286145		2	rs111820022	127291017	G	A	0.0932836	-0.51096	0.103596	3.92467e-06	0.00321233	0.0348543	FALSE
Glu-DL	ENSG00000286957		2	rs185083462	130308517	C	T	0.261194	0.322837	0.0662458	4.96149e-06	0.00248807	0.0286557	FALSE
Glu-DL	ENSG00000136699	SMPD4	2	rs11886689	129973557	T	C	0.0485075	-0.403169	0.0756697	7.85806e-07	0.000655716	0.0095991	FALSE
Glu-DL	ENSG00000293311	SMPD4BP	2	rs12988424	131492520	T	G	0.175373	-0.311113	0.0330336	6.93112e-15	5.2388e-11	4.79468e-09	TRUE
Glu-DL	ENSG00000287151	LINC03124	2	rs6720375	131682500	G	C	0.585821	0.327346	0.043298	4.06428e-11	5.27529e-08	2.41404e-06	TRUE
Glu-DL	ENSG00000227745		2	rs62165007	132256558	G	A	0.0970149	-0.99055	0.0991124	4.67903e-16	1.10637e-11	1.12413e-09	FALSE
Glu-DL	ENSG00000163046	ANKRD30BL	2	rs62165007	132256558	G	A	0.0970149	-0.797745	0.0590181	5.48596e-23	2.95259e-17	8.63411e-15	FALSE
Glu-DL	ENSG00000183840	GPR39	2	rs78889559	132355985	A	G	0.141791	0.33265	0.0615854	5.79468e-07	0.000399756	0.00627656	FALSE
Glu-DL	ENSG00000152128	TMEM163	2	rs666614	134532882	G	C	0.529851	-0.0989351	0.0210332	9.66118e-06	0.00435338	0.0442327	FALSE
Glu-DL	ENSG00000082258	CCNT2	2	rs1348793	134918338	T	C	0.264925	0.122591	0.0250826	4.69e-06	0.00166095	0.0206575	TRUE
Glu-DL	ENSG00000162947	LINC01931	2	rs1347718	150031043	A	C	0.324627	-0.360889	0.0721156	2.94126e-06	0.00172138	0.0213427	FALSE
Glu-DL	ENSG00000226383	LINC01876	2	rs146233246	156257695	G	A	0.283582	0.69854	0.0950486	1.0741e-10	3.30019e-07	1.24036e-05	FALSE
Glu-DL	ENSG00000153234	NR4A2	2	rs76117428	156111072	A	G	0.108209	0.289759	0.0611231	8.36823e-06	0.00387526	0.0401575	FALSE
Glu-DL	ENSG00000144283	PKP4	2	rs3771596	158537027	C	A	0.272388	0.14505	0.0263932	3.90858e-07	0.000469396	0.00722439	FALSE
Glu-DL	ENSG00000196151	WDSUB1	2	rs12692544	159225843	C	T	0.854478	-0.232934	0.04308	5.66169e-07	0.000692383	0.01005	TRUE
Glu-DL	ENSG00000154479	CFAP210	2	rs76487317	169658367	T	C	0.141791	-0.521433	0.0714737	1.37522e-10	1.06055e-06	3.45529e-05	FALSE
Glu-DL	ENSG00000213160	KLHL23	2	rs78319792	169707897	G	A	0.156716	-0.175727	0.0264494	2.64633e-09	8.09544e-06	0.00021521	FALSE
Glu-DL	ENSG00000213160	KLHL23	2	rs78319792	169707897	G	A	0.156716	-0.175727	0.0264494	2.64633e-09	8.09544e-06	0.00021521	FALSE
Glu-DL	ENSG00000077380	DYNC1I2	2	rs4668412	171763260	A	G	0.279851	0.12093	0.0227995	8.67619e-07	0.000773874	0.0110063	TRUE
Glu-DL	ENSG00000115844	DLX2	2	rs10930534	172210339	C	T	0.742537	-0.341995	0.0651916	1.1018e-06	0.002038	0.0245573	TRUE
Glu-DL	ENSG00000144306	SCRN3	2	rs41270193	174398242	C	T	0.268657	-0.24086	0.0404113	5.39735e-08	0.000212162	0.00366	FALSE
Glu-DL	ENSG00000018510	AGPS	2	rs58483300	177385000	T	A	0.104478	-0.134923	0.0287192	9.88054e-06	0.00458333	0.0460231	FALSE
Glu-DL	ENSG00000187231	SESTD1	2	rs10188759	179128039	C	G	0.261194	-0.079534	0.0140689	2.01234e-07	0.000269372	0.00452847	FALSE
Glu-DL	ENSG00000162992	NEUROD1	2	rs115583150	181416842	T	C	0.0597015	0.561763	0.108624	1.49396e-06	0.00112782	0.0149414	FALSE
Glu-DL	ENSG00000188738	FSIP2	2	rs13387015	185410772	T	C	0.19403	0.541829	0.114582	8.76402e-06	0.00252601	0.0289934	FALSE
Glu-DL	ENSG00000138448	ITGAV	2	rs13006571	186628237	A	G	0.742537	-0.223925	0.0429325	1.24736e-06	0.000584953	0.0087013	TRUE
Glu-DL	ENSG00000293899		2	rs11683340	188330611	A	G	0.0522388	0.558028	0.104905	8.14341e-07	0.001448	0.0184884	TRUE
Glu-DL	ENSG00000288866		2	rs7560722	189388196	C	T	0.951493	-1.23061	0.239607	1.72755e-06	0.00340996	0.0365032	FALSE
Glu-DL	ENSG00000151689	INPP1	2	rs1972288	190215024	A	G	0.227612	0.302899	0.0509782	5.84692e-08	7.0556e-05	0.00140519	FALSE
Glu-DL	ENSG00000138378	STAT4	2	rs35339956	191261668	C	T	0.276119	-0.454937	0.0717003	1.00193e-08	1.43008e-05	0.000358699	FALSE
Glu-DL	ENSG00000128641	MYO1B	2	rs35596292	191246890	C	T	0.276119	-0.213104	0.0406887	1.14129e-06	0.000923117	0.0127214	TRUE
Glu-DL	ENSG00000118997	DNAH7	2	rs1519605	196176085	C	T	0.690298	0.267888	0.0477908	2.46301e-07	0.000122436	0.00228295	FALSE
Glu-DL	ENSG00000065413	ANKRD44	2	rs6434920	197246949	C	G	0.335821	0.104581	0.016992	2.31425e-08	1.81801e-05	0.000441233	FALSE
Glu-DL	ENSG00000115524	SF3B1	2	rs8539	197497294	T	C	0.727612	-0.131741	0.0277246	8.01012e-06	0.0027665	0.0313153	FALSE
Glu-DL	ENSG00000162971	TYW5	2	rs796364	199851396	C	A	0.820895	0.266691	0.0418556	8.90228e-09	2.54072e-05	0.00058356	TRUE
Glu-DL	ENSG00000273209		2	rs7592801	202047965	T	C	0.514925	-0.340462	0.0667862	2.01711e-06	0.00124211	0.0162401	FALSE
Glu-DL	ENSG00000163596	ICA1L	2	rs72928613	202974905	T	A	0.0932836	-0.139238	0.0237467	8.19433e-08	4.89042e-05	0.0010341	FALSE
Glu-DL	ENSG00000138400	MDH1B	2	rs12476420	206808031	C	T	0.201493	0.47691	0.0815195	8.67321e-08	0.000111009	0.00209397	FALSE
Glu-DL	ENSG00000188674	C2orf80	2	rs6739379	208175419	A	T	0.347015	0.199786	0.0395456	2.42704e-06	0.00194596	0.0235666	TRUE
Glu-DL	ENSG00000227769		2	rs34732883	214809647	C	T	0.656716	0.992611	0.0764967	5.87094e-22	8.8018e-17	2.18845e-14	TRUE
Glu-DL	ENSG00000079246	XRCC5	2	rs7576830	216096472	T	C	0.623134	0.0712894	0.0138899	1.75219e-06	0.00185753	0.0227021	FALSE
Glu-DL	ENSG00000260804	LINC01963	2	rs72956701	216244876	G	A	0.0522388	1.05954	0.142824	7.81384e-11	2.21369e-07	8.73054e-06	FALSE
Glu-DL	ENSG00000308081		2	rs13406710	220826908	C	T	0.16791	0.375912	0.0759556	3.66954e-06	0.00286876	0.0321447	FALSE
Glu-DL	ENSG00000116120	FARSB	2	rs1438620	222173742	A	G	0.399254	0.107859	0.0225909	7.32838e-06	0.00504731	0.0492387	FALSE
Glu-DL	ENSG00000181798	LINC00471	2	rs28685161	231514081	C	T	0.272388	-0.44258	0.0518543	4.34896e-13	1.67909e-08	8.56651e-07	TRUE
Glu-DL	ENSG00000130147	SH3BP4	2	rs12997096	234679344	T	G	0.507463	-0.457011	0.055618	1.92412e-12	1.08682e-08	5.90727e-07	TRUE
Glu-DL	ENSG00000144504	ANKMY1	2	rs3821348	240524036	C	A	0.205224	0.182969	0.0302869	3.79847e-08	6.30189e-05	0.00127628	FALSE
Glu-DL	ENSG00000006607	FARP2	2	rs10195106	241427987	C	T	0.798507	0.238603	0.0249846	3.73606e-15	6.18026e-11	5.46405e-09	FALSE
Glu-DL	ENSG00000154252	GAL3ST2	2	rs6756901	241767686	A	G	0.55597	0.396623	0.0640735	1.98182e-08	2.44601e-05	0.000566143	FALSE
Glu-DL	ENSG00000233806	LINC01237	2	rs62193115	241830235	C	T	0.197761	-0.240009	0.0416736	1.28099e-07	0.000139461	0.00254886	FALSE
Glu-DL	ENSG00000233806	LINC01237	2	rs62193115	241830235	C	T	0.197761	-0.240009	0.0416736	1.28099e-07	0.000139461	0.00254886	FALSE
Glu-DL	ENSG00000196476	C20orf96	20	rs3827149	276225	G	A	0.701493	0.268659	0.050711	8.90109e-07	0.000962545	0.0131589	FALSE
Glu-DL	ENSG00000101282	RSPO4	20	rs7348188	1118311	C	G	0.0820896	-0.794282	0.119573	2.66113e-09	7.39749e-06	0.000197973	TRUE
Glu-DL	ENSG00000286787		20	rs55878704	1099817	C	T	0.0895522	-0.445822	0.0777689	1.43514e-07	0.000399757	0.00627656	FALSE
Glu-DL	ENSG00000296607		20	rs9575	1445748	C	T	0.384328	0.351343	0.0442245	6.84852e-12	1.11623e-07	4.77961e-06	FALSE
Glu-DL	ENSG00000101236	RNF24	20	rs34969280	4091293	A	G	0.503731	0.067561	0.0120782	2.58872e-07	0.000583685	0.0087009	TRUE
Glu-DL	ENSG00000226995	LINC00658	20	rs3810569	5498007	C	T	0.16791	-0.40777	0.0725978	2.34704e-07	0.000296794	0.00489463	FALSE
Glu-DL	ENSG00000132669	RIN2	20	rs12625484	19767092	C	T	0.205224	-0.363958	0.0456163	5.84206e-12	2.81839e-08	1.38487e-06	FALSE
Glu-DL	ENSG00000297073		20	rs6046818	20365534	T	C	0.179104	0.433824	0.0899893	6.10593e-06	0.00378484	0.0394249	FALSE
Glu-DL	ENSG00000125804	FAM182A	20	rs6107130	26008348	C	A	0.395522	-0.57485	0.0629419	2.63722e-14	1.98842e-10	1.53807e-08	FALSE
Glu-DL	ENSG00000198547	C20orf203	20	rs111774061	32634971	G	A	0.242537	0.183074	0.0383687	7.41571e-06	0.00418687	0.0428312	FALSE
Glu-DL	ENSG00000100991	TRPC4AP	20	rs2050652	35145377	G	A	0.264925	-0.103931	0.0184485	2.18649e-07	9.92629e-05	0.00189507	TRUE
Glu-DL	ENSG00000125991	ERGIC3	20	rs2277862	35564866	C	T	0.164179	0.293901	0.0389698	4.42788e-11	1.66029e-06	5.22465e-05	FALSE
Glu-DL	ENSG00000149639	MTCL2	20	rs1146263	36860165	T	C	0.466418	0.0997016	0.0123211	3.44805e-12	1.44293e-08	7.45686e-07	FALSE
Glu-DL	ENSG00000101353	MROH8	20	rs77938357	37243848	G	C	0.190299	-0.275537	0.0530219	1.34871e-06	0.000917556	0.0126739	TRUE
Glu-DL	ENSG00000149633	KIAA1755	20	rs6123522	38260619	T	G	0.216418	0.558745	0.082178	1.31596e-09	2.2023e-06	6.70161e-05	TRUE
Glu-DL	ENSG00000224635		20	rs1626465	38403608	T	C	0.261194	0.746327	0.0825896	4.14553e-14	1.76357e-10	1.40028e-08	FALSE
Glu-DL	ENSG00000286100		20	rs6031847	44885562	C	T	0.33209	-1.08499	0.0813463	1.1975e-22	4.21981e-18	1.40537e-15	TRUE
Glu-DL	ENSG00000101104	PABPC1L	20	rs4931	44901593	A	C	0.347015	-0.362547	0.0478313	3.71626e-11	1.65804e-07	6.78463e-06	FALSE
Glu-DL	ENSG00000158470	B4GALT5	20	rs6091023	49662640	C	T	0.529851	-0.105097	0.0167683	1.40975e-08	2.64753e-05	0.000603468	FALSE
Glu-DL	ENSG00000271774		20	rs4474938	53557968	C	T	0.712687	-0.369249	0.070297	1.07186e-06	0.001444	0.018457	FALSE
Glu-DL	ENSG00000259723		20	rs6097480	53560021	G	A	0.716418	-0.891127	0.084387	3.36192e-17	4.49908e-13	5.56097e-11	FALSE
Glu-DL	ENSG00000171940	ZNF217	20	rs6097480	53560021	G	A	0.716418	-0.272667	0.0532705	1.85434e-06	0.00282997	0.0317991	FALSE
Glu-DL	ENSG00000228340	MIR646HG	20	rs2025050	60140164	C	T	0.511194	-0.529953	0.105688	2.82537e-06	0.00261096	0.0297801	FALSE
Glu-DL	ENSG00000228340	MIR646HG	20	rs2025050	60140164	C	T	0.511194	-0.529953	0.105688	2.82537e-06	0.00261096	0.0297801	FALSE
Glu-DL	ENSG00000228340	MIR646HG	20	rs2025050	60140164	C	T	0.511194	-0.529953	0.105688	2.82537e-06	0.00261096	0.0297801	FALSE
Glu-DL	ENSG00000149679	CABLES2	20	rs2427323	62406099	A	G	0.541045	0.203709	0.0409713	3.34836e-06	0.00488817	0.048395	FALSE
Glu-DL	ENSG00000101187	SLCO4A1	20	rs6122141	62642365	G	C	0.585821	0.449176	0.0483543	1.26761e-14	1.17206e-10	9.69128e-09	TRUE
Glu-DL	ENSG00000101190	TCFL5	20	rs6010772	62865936	T	C	0.279851	0.256274	0.0447528	1.47367e-07	0.00050643	0.00771513	FALSE
Glu-DL	ENSG00000196700	ZNF512B	20	rs817325	63963816	A	G	0.55597	-0.417824	0.0322198	6.07968e-22	5.48667e-17	1.46182e-14	FALSE
Glu-DL	ENSG00000232855		21	rs2776210	28896236	A	G	0.716418	-0.306396	0.0443355	7.94353e-10	2.0504e-06	6.2712e-05	FALSE
Glu-DL	ENSG00000156273	BACH1	21	rs9981313	29458073	T	G	0.36194	0.149248	0.0234859	9.59397e-09	1.52994e-05	0.000380564	FALSE
Glu-DL	ENSG00000156273	BACH1	21	rs9981313	29458073	T	G	0.36194	0.149248	0.0234859	9.59397e-09	1.52994e-05	0.000380564	FALSE
Glu-DL	ENSG00000159200	RCAN1	21	rs8129272	34542324	G	A	0.126866	0.225197	0.0459206	4.39161e-06	0.00404443	0.0416373	FALSE
Glu-DL	ENSG00000142197	DOP1B	21	rs4817774	36112344	T	G	0.384328	-0.103177	0.0203433	2.24099e-06	0.0032276	0.0349883	FALSE
Glu-DL	ENSG00000159256	MORC3	21	rs8184901	36339429	A	T	0.634328	-0.0884819	0.0180618	4.48365e-06	0.00393715	0.0407636	FALSE
Glu-DL	ENSG00000159267	HLCS	21	rs1892915	36989963	T	C	0.809702	0.274638	0.0331454	1.39484e-12	1.33591e-08	7.02492e-07	TRUE
Glu-DL	ENSG00000182670	TTC3	21	rs1543750	37074618	A	G	0.470149	0.0739542	0.0106582	7.00129e-10	1.59866e-06	5.07064e-05	FALSE
Glu-DL	ENSG00000182093	GET1	21	rs2837006	39400510	T	C	0.649254	-0.392996	0.0302299	5.27215e-22	5.73119e-17	1.49378e-14	FALSE
Glu-DL	ENSG00000225218		21	rs2001521	42812070	T	A	0.145522	0.56462	0.0833597	1.47907e-09	4.50129e-06	0.000127283	FALSE
Glu-DL	ENSG00000160200	CBS	21	rs234731	43029279	G	A	0.369403	-0.607178	0.0937925	5.66214e-09	1.04458e-05	0.000272258	FALSE
Glu-DL	ENSG00000160200	CBS	21	rs234731	43029279	G	A	0.369403	-0.607178	0.0937925	5.66214e-09	1.04458e-05	0.000272258	FALSE
Glu-DL	ENSG00000160221	GATD3	21	rs13047030	44057275	A	G	0.164179	1.04243	0.0980147	2.37037e-17	3.95979e-13	5.05035e-11	FALSE
Glu-DL	ENSG00000295969		21	rs12627022	45033229	G	A	0.190299	-0.542564	0.0991671	4.33123e-07	0.000597866	0.00887137	FALSE
Glu-DL	ENSG00000173638	SLC19A1	21	rs2838951	45509806	G	C	0.585821	-0.187013	0.0350148	7.44793e-07	0.000855321	0.0119659	FALSE
Glu-DL	ENSG00000160282	FTCD	21	rs8133205	46179366	C	T	0.19403	-0.810434	0.10533	2.18817e-11	2.50466e-07	9.6869e-06	FALSE
Glu-DL	ENSG00000160284	SPATC1L	21	rs2877135	46174838	C	T	0.25	-0.64492	0.0853989	4.22604e-11	2.24538e-07	8.79767e-06	FALSE
Glu-DL	ENSG00000160285	LSS	21	rs2839175	46258243	T	C	0.309702	0.154342	0.0288138	6.98298e-07	0.000915531	0.0126606	FALSE
Glu-DL	ENSG00000160294	MCM3AP	21	rs11701802	46516736	A	G	0.503731	-0.107406	0.0176372	3.07419e-08	6.5465e-05	0.00131252	FALSE
Glu-DL	ENSG00000243156	MICAL3	22	rs5746493	17914806	C	T	0.33209	0.104587	0.0140676	7.25664e-11	1.60747e-07	6.60021e-06	TRUE
Glu-DL	ENSG00000273032	DGCR5	22	rs56326510	19137870	A	C	0.33209	0.0861072	0.0188509	1.63405e-05	0.00306054	0.0336	FALSE
Glu-DL	ENSG00000305663		22	rs9619753	20437534	G	A	0.261194	0.341811	0.0618535	3.44028e-07	0.00034627	0.00555024	TRUE
Glu-DL	ENSG00000207751		22	rs62235099	21689620	G	A	0.391791	-0.356831	0.0392354	3.15802e-14	1.24952e-10	1.01912e-08	FALSE
Glu-DL	ENSG00000100027	YPEL1	22	rs861811	21706156	C	T	0.130597	-0.155096	0.0270926	1.48491e-07	6.33378e-05	0.00127842	FALSE
Glu-DL	ENSG00000272733		22	rs6003823	23649233	C	T	0.410448	-0.416445	0.0802379	1.38522e-06	0.00128309	0.0167031	FALSE
Glu-DL	ENSG00000189269	DRICH1	22	rs4997837	23632677	C	G	0.38806	-0.306213	0.0591584	1.46652e-06	0.00157656	0.019876	FALSE
Glu-DL	ENSG00000228315	GUSBP11	22	rs12170464	23695119	T	G	0.190299	0.116757	0.0183747	9.6182e-09	1.71005e-05	0.00041842	FALSE
Glu-DL	ENSG00000273295		22	rs5751776	23924767	A	C	0.574627	0.847805	0.0514734	2.48584e-28	6.79777e-23	6.26933e-20	FALSE
Glu-DL	ENSG00000099974	DDTL	22	rs5751776	23924767	A	C	0.574627	-0.71471	0.0630149	9.14816e-19	2.42967e-14	3.78317e-12	FALSE
Glu-DL	ENSG00000290199		22	rs5751776	23924767	A	C	0.574627	1.46279	0.0674583	1.27977e-36	5.66492e-29	1.69798e-25	FALSE
Glu-DL	ENSG00000099991	CABIN1	22	rs6004044	24025718	G	A	0.212687	0.120987	0.024301	3.25991e-06	0.00305285	0.0336	FALSE
Glu-DL	ENSG00000100024	UPB1	22	rs12168879	24457705	C	T	0.541045	-0.449117	0.0663166	1.48555e-09	2.14964e-06	6.558e-05	FALSE
Glu-DL	ENSG00000226471		22	rs6005867	28769132	T	C	0.291045	-0.354909	0.0531444	2.26869e-09	3.6216e-06	0.000105391	FALSE
Glu-DL	ENSG00000225465	RFPL1S	22	rs12484859	29448895	A	G	0.16791	0.182377	0.0241253	4.07797e-11	1.40937e-07	5.90822e-06	FALSE
Glu-DL	ENSG00000100065	CARD10	22	rs9607469	37523260	G	A	0.205224	-0.548539	0.0869342	1.17033e-08	1.60729e-05	0.000394888	FALSE
Glu-DL	ENSG00000100106	TRIOBP	22	rs4254591	37908851	G	T	0.343284	-0.126246	0.0212852	6.12064e-08	6.6903e-05	0.00133688	FALSE
Glu-DL	ENSG00000100139	MICALL1	22	rs5756828	37821054	G	C	0.507463	0.141908	0.0286546	3.62221e-06	0.00480283	0.0476682	FALSE
Glu-DL	ENSG00000184949	FAM227A	22	rs6001199	38692759	C	T	0.30597	0.317634	0.0261285	2.26271e-20	7.71565e-16	1.5679e-13	FALSE
Glu-DL	ENSG00000176177	ENTHD1	22	rs9611183	39467726	T	C	0.130597	0.386723	0.0814721	8.1706e-06	0.00395987	0.0409281	FALSE
Glu-DL	ENSG00000205704	SMIM45	22	rs2269665	41981874	G	A	0.0970149	-0.503633	0.101165	3.26434e-06	0.00179059	0.0220413	FALSE
Glu-DL	ENSG00000183066	WBP2NL	22	rs5758623	42170308	G	C	0.406716	0.355443	0.0426818	1.14694e-12	8.48894e-09	4.69021e-07	FALSE
Glu-DL	ENSG00000281538		22	rs5751229	42149230	G	A	0.223881	0.414965	0.0662197	1.4167e-08	2.85601e-05	0.000644857	FALSE
Glu-DL	ENSG00000280011		22	rs3788608	44245706	G	A	0.104478	0.828523	0.128318	6.10184e-09	2.07305e-05	0.000491052	TRUE
Glu-DL	ENSG00000100376	FAM118A	22	rs136564	45368994	T	C	0.119403	0.61205	0.0458719	1.17322e-22	1.904e-16	4.38997e-14	FALSE
Glu-DL	ENSG00000128408	RIBC2	22	rs5765364	45440841	C	T	0.309702	-0.333469	0.0616302	5.57292e-07	0.000760591	0.0108431	FALSE
Glu-DL	ENSG00000130638	ATXN10	22	rs11705057	45744575	G	C	0.0970149	-0.132494	0.0229541	1.21238e-07	0.00018887	0.00329613	FALSE
Glu-DL	ENSG00000100426	ZBED4	22	rs28488933	49946107	T	C	0.30597	-0.111339	0.0178867	1.70273e-08	3.93256e-05	0.00085882	FALSE
Glu-DL	ENSG00000144455	SUMF1	3	rs4685744	4361853	C	T	0.496269	0.269053	0.026847	4.11542e-16	8.35061e-12	8.9392e-10	FALSE
Glu-DL	ENSG00000144455	SUMF1	3	rs4685744	4361853	C	T	0.496269	0.269053	0.026847	4.11542e-16	8.35061e-12	8.9392e-10	FALSE
Glu-DL	ENSG00000189229		3	rs7431647	6496656	A	G	0.242537	0.882076	0.117286	4.87901e-11	2.11086e-07	8.40799e-06	FALSE
Glu-DL	ENSG00000196220	SRGAP3	3	rs73126664	9362966	C	G	0.152985	0.10738	0.0222859	6.16685e-06	0.00504046	0.049212	TRUE
Glu-DL	ENSG00000171148	TADA3	3	rs293794	9761943	A	G	0.175373	0.264602	0.0543552	5.06706e-06	0.00345046	0.036838	FALSE
Glu-DL	ENSG00000240288	GHRLOS	3	rs242730	10276858	A	G	0.36194	0.407803	0.0583415	5.54883e-10	2.27179e-06	6.87815e-05	FALSE
Glu-DL	ENSG00000144712	CAND2	3	rs9870269	12811951	T	G	0.619403	0.170751	0.0278782	2.63721e-08	0.000140674	0.00256234	FALSE
Glu-DL	ENSG00000154764	WNT7A	3	rs12492620	13825758	A	G	0.242537	0.214085	0.0358592	5.17012e-08	9.56055e-05	0.00183695	FALSE
Glu-DL	ENSG00000131379	C3orf20	3	rs2053017	14660765	G	A	0.395522	-0.52413	0.0678455	1.89436e-11	7.03508e-08	3.12395e-06	FALSE
Glu-DL	ENSG00000131370	SH3BP5	3	rs2688668	15272091	G	A	0.589552	0.145097	0.0200386	1.76612e-10	1.21831e-06	3.90557e-05	TRUE
Glu-DL	ENSG00000131386	GALNT15	3	rs7641891	16142231	C	T	0.447761	0.433494	0.0586211	8.71154e-11	3.47024e-07	1.29212e-05	FALSE
Glu-DL	ENSG00000163576	EFHB	3	rs11128927	19946945	G	C	0.36194	1.06238	0.0814451	4.3459e-22	7.21299e-17	1.83999e-14	TRUE
Glu-DL	ENSG00000163491	NEK10	3	rs35903173	27246260	T	C	0.201493	-0.171297	0.036008	7.84137e-06	0.00379039	0.0394484	FALSE
Glu-DL	ENSG00000206559	ZCWPW2	3	rs74878093	28367053	C	T	0.470149	-0.138245	0.0282413	4.54997e-06	0.00310001	0.0339118	FALSE
Glu-DL	ENSG00000168026	TTC21A	3	rs74833943	38881542	A	C	0.123134	-0.24419	0.0379457	6.71508e-09	2.40363e-05	0.000557411	FALSE
Glu-DL	ENSG00000287780		3	rs59685908	39417278	T	C	0.25	0.418339	0.0871841	6.6719e-06	0.00397449	0.0410439	FALSE
Glu-DL	ENSG00000010282	HHATL	3	rs2290973	42696805	G	A	0.488806	-0.248409	0.0493923	2.66004e-06	0.0030556	0.0336	FALSE
Glu-DL	ENSG00000244607	CCDC13	3	rs10865923	42771147	G	C	0.276119	-0.270394	0.0530326	2.01022e-06	0.00153048	0.0194587	FALSE
Glu-DL	ENSG00000196345	ZKSCAN7	3	rs6769288	44629738	G	A	0.276119	-0.24604	0.0404685	3.21094e-08	0.000166121	0.00294195	FALSE
Glu-DL	ENSG00000144792	ZNF660	3	rs12491435	44424463	C	G	0.291045	0.190992	0.0375489	2.11159e-06	0.000952292	0.0130389	FALSE
Glu-DL	ENSG00000164048	ZNF589	3	rs9819094	48278068	C	T	0.320896	0.103674	0.019349	6.93635e-07	0.000174621	0.00307432	FALSE
Glu-DL	ENSG00000004534	RBM6	3	rs7613875	49934081	C	A	0.574627	-0.0611065	0.0114138	7.06379e-07	0.000218693	0.00375884	FALSE
Glu-DL	ENSG00000055955	ITIH4	3	rs4687556	52856459	T	C	0.802239	0.310421	0.0543502	1.57051e-07	0.000150785	0.00271445	FALSE
Glu-DL	ENSG00000272305		3	rs2336723	53072031	T	C	0.615672	0.958669	0.0708906	5.33831e-23	2.35193e-17	7.13169e-15	FALSE
Glu-DL	ENSG00000163933	RFT1	3	rs2581829	53099510	A	G	0.641791	0.214031	0.0357755	4.89829e-08	7.24597e-05	0.00143358	FALSE
Glu-DL	ENSG00000180376	CCDC66	3	rs73079863	56527328	G	A	0.455224	0.106009	0.0173371	2.75868e-08	4.61906e-05	0.000981914	FALSE
Glu-DL	ENSG00000295019		3	rs55692656	58397447	A	T	0.343284	-0.361186	0.0748674	6.02202e-06	0.00361125	0.03818	FALSE
Glu-DL	ENSG00000277855		3	rs6549407	71787413	C	T	0.152985	-0.346037	0.0668407	1.46132e-06	0.00253017	0.0289941	FALSE
Glu-DL	ENSG00000242516	LINC00960	3	rs2875284	75675658	A	G	0.574627	-0.942801	0.0579016	5.26237e-28	5.98948e-22	5.12932e-19	FALSE
Glu-DL	ENSG00000113966	ARL6	3	rs10222570	97636185	C	T	0.0970149	0.344229	0.0710455	5.54615e-06	0.00212733	0.0253599	FALSE
Glu-DL	ENSG00000154175	ABI3BP	3	rs9818993	101158575	G	A	0.701493	1.10418	0.103118	1.69432e-17	6.46235e-13	7.90612e-11	FALSE
Glu-DL	ENSG00000182504	CEP97	3	rs13092067	102205863	C	T	0.0932836	-0.158185	0.0324472	4.92592e-06	0.00218059	0.0257577	TRUE
Glu-DL	ENSG00000176040	TMPRSS7	3	rs3749310	112011699	G	A	0.496269	-0.828188	0.0803337	1.07714e-16	2.58321e-12	3.00691e-10	FALSE
Glu-DL	ENSG00000114529	C3orf52	3	rs9813351	112012215	G	C	0.5	-0.411156	0.0628159	4.1118e-09	6.84582e-06	0.000185696	FALSE
Glu-DL	ENSG00000144857	BOC	3	rs79231157	113212058	T	G	0.376866	0.448884	0.0561529	5.44102e-12	2.29043e-08	1.15382e-06	TRUE
Glu-DL	ENSG00000144847	IGSF11	3	rs6776910	119217544	A	G	0.0634328	0.7884	0.108847	1.74711e-10	6.30001e-07	2.16429e-05	FALSE
Glu-DL	ENSG00000293512	BTNL12P	3	rs114872182	119944933	G	A	0.0559702	2.08963	0.237758	1.32415e-13	2.86755e-08	1.40328e-06	FALSE
Glu-DL	ENSG00000121542	SEC22A	3	rs62262565	123227935	C	T	0.160448	-0.209903	0.03631	1.16803e-07	0.000165421	0.00293388	FALSE
Glu-DL	ENSG00000160145	KALRN	3	rs1373930	124419762	C	T	0.425373	0.0617379	0.0124776	3.68695e-06	0.00178126	0.021949	FALSE
Glu-DL	ENSG00000304694		3	rs73190614	125601425	G	A	0.0522388	-0.67525	0.0705123	3.302e-15	7.36697e-11	6.30898e-09	FALSE
Glu-DL	ENSG00000284624		3	rs3116052	125772584	A	G	0.686567	-0.235729	0.0429436	4.01561e-07	0.000406482	0.00635779	FALSE
Glu-DL	ENSG00000241288	LINC02614	3	rs11919548	126040089	C	T	0.276119	-0.374966	0.0430055	1.83721e-13	2.08482e-09	1.26242e-07	FALSE
Glu-DL	ENSG00000300950		3	rs12634109	125977245	G	A	0.257463	-0.581842	0.085674	1.36346e-09	2.94279e-06	8.79859e-05	FALSE
Glu-DL	ENSG00000132394	EEFSEC	3	rs2955102	128146667	A	G	0.216418	-0.112451	0.019567	1.3499e-07	0.000148266	0.00267311	FALSE
Glu-DL	ENSG00000163902	RPN1	3	rs9842276	128666422	G	C	0.705224	-0.952756	0.0544991	4.74317e-30	3.16181e-24	3.44621e-21	FALSE
Glu-DL	ENSG00000004399	PLXND1	3	rs9832275	129611076	T	C	0.0932836	0.370339	0.0776363	7.45214e-06	0.00323679	0.0350221	FALSE
Glu-DL	ENSG00000113971	NPHP3	3	rs11709184	132722963	G	A	0.205224	-0.235495	0.0429398	4.09994e-07	0.00031726	0.00518939	TRUE
Glu-DL	ENSG00000291042		3	rs11713994	133693038	G	A	0.108209	-0.302463	0.0518468	9.30986e-08	0.000121186	0.00226315	FALSE
Glu-DL	ENSG00000288700		3	rs9836401	134618055	C	T	0.641791	0.152382	0.024324	1.42804e-08	1.69876e-05	0.000416507	TRUE
Glu-DL	ENSG00000168917	SLC35G2	3	rs4038076	136822270	T	C	0.671642	-0.334468	0.0461107	1.66611e-10	3.20952e-07	1.21007e-05	FALSE
Glu-DL	ENSG00000158186	MRAS	3	rs1199334	138372298	A	G	0.776119	-0.242127	0.0314313	2.09727e-11	4.72085e-08	2.19381e-06	FALSE
Glu-DL	ENSG00000155893	PXYLP1	3	rs12486843	141246214	G	A	0.541045	-0.181181	0.0274867	3.3453e-09	8.73928e-06	0.000231812	FALSE
Glu-DL	ENSG00000287045		3	rs1916638	142693382	C	T	0.223881	-0.234272	0.0409718	1.5284e-07	0.000126078	0.00234356	TRUE
Glu-DL	ENSG00000120742	SERP1	3	rs2049227	150628684	T	C	0.354478	0.18813	0.0322343	9.20785e-08	0.000178748	0.0031286	FALSE
Glu-DL	ENSG00000197980	LEKR1	3	rs6783162	156886315	T	C	0.847015	-0.442341	0.0723215	2.73771e-08	3.25389e-05	0.000726485	FALSE
Glu-DL	ENSG00000118855	MFSD1	3	rs1548093	158821697	A	G	0.212687	-0.166544	0.0320209	1.3245e-06	0.000766798	0.0109186	FALSE
Glu-DL	ENSG00000169251	NMD3	3	rs7640874	160954829	T	A	0.358209	-0.106961	0.019777	5.63044e-07	0.000289734	0.00480065	FALSE
Glu-DL	ENSG00000244706		3	rs9824464	167918111	T	C	0.712687	-0.563072	0.0788082	2.73979e-10	3.37259e-07	1.25967e-05	FALSE
Glu-DL	ENSG00000075651	PLD1	3	rs12486090	171796285	A	C	0.119403	0.819667	0.116903	5.03062e-10	1.18664e-06	3.81426e-05	FALSE
Glu-DL	ENSG00000144959	NCEH1	3	rs62281198	172715895	T	C	0.80597	0.414233	0.0622186	2.4874e-09	3.8422e-06	0.00011047	FALSE
Glu-DL	ENSG00000197584	KCNMB2	3	rs12495955	178749831	A	G	0.347015	0.29157	0.0492173	6.30891e-08	5.22299e-05	0.00109095	TRUE
Glu-DL	ENSG00000188729	OSTN	3	rs1454692	191197168	T	A	0.339552	0.684296	0.112364	3.07122e-08	4.57111e-05	0.000975178	FALSE
Glu-DL	ENSG00000041802	LSG1	3	rs80006830	194680473	G	A	0.160448	0.354534	0.0464055	2.81335e-11	1.41726e-07	5.92059e-06	FALSE
Glu-DL	ENSG00000289929		3	rs111801697	195600362	A	G	0.190299	-0.746583	0.0830468	5.15985e-14	5.90546e-10	4.00017e-08	FALSE
Glu-DL	ENSG00000176945	MUC20	3	rs2641733	195731834	A	G	0.847015	-0.506036	0.0880644	1.35449e-07	0.000197918	0.00343405	FALSE
Glu-DL	ENSG00000161217	PCYT1A	3	rs13062703	196343409	A	T	0.115672	-0.181086	0.034454	1.05801e-06	0.0016472	0.0205437	FALSE
Glu-DL	ENSG00000119227	PIGZ	3	rs76347663	196962524	A	G	0.134328	-0.283711	0.0568655	3.12573e-06	0.003005	0.0332745	FALSE
Glu-DL	ENSG00000291091		3	rs4857529	197579306	A	G	0.682836	-0.120806	0.024841	5.16544e-06	0.0034043	0.0364751	FALSE
Glu-DL	ENSG00000286909		3	rs7628440	197649031	T	G	0.279851	-0.318912	0.0657965	5.50776e-06	0.00399501	0.0411848	FALSE
Glu-DL	ENSG00000250312	ZNF718	4	rs11730821	135134	A	C	0.220149	0.318289	0.0293035	8.31864e-18	1.61294e-13	2.19753e-11	FALSE
Glu-DL	ENSG00000186777	ZNF732	4	rs61794999	238578	T	A	0.145522	-0.419594	0.0882059	7.84788e-06	0.0024542	0.0284019	FALSE
Glu-DL	ENSG00000272927		4	rs73058406	662092	C	G	0.134328	-0.584036	0.0901019	5.45606e-09	1.07398e-05	0.000279315	FALSE
Glu-DL	ENSG00000178222	RNF212	4	rs12233733	1064488	C	T	0.19403	-0.425693	0.075308	2.01635e-07	0.000670759	0.00977036	FALSE
Glu-DL	ENSG00000163945	UVSSA	4	rs28545482	1193115	C	T	0.108209	0.348704	0.0562948	1.94624e-08	3.82818e-05	0.000840618	FALSE
Glu-DL	ENSG00000125388	GRK4	4	rs3021146	2956459	A	G	0.33209	-0.210619	0.0159533	2.16875e-22	3.08282e-16	6.72023e-14	FALSE
Glu-DL	ENSG00000290888		4	rs35239356	4159879	C	T	0.0820896	0.805471	0.107259	5.13615e-11	2.03181e-07	8.16907e-06	FALSE
Glu-DL	ENSG00000310372		4	rs12645336	6632104	T	C	0.0858209	-0.574305	0.063727	4.65286e-14	1.54517e-07	6.38817e-06	FALSE
Glu-DL	ENSG00000288075		4	rs6857841	9369171	C	T	0.242537	0.464013	0.0425673	6.95205e-18	1.13659e-13	1.58738e-11	FALSE
Glu-DL	ENSG00000287117		4	rs6842656	9690426	G	C	0.246269	0.380431	0.0295006	8.36512e-22	2.88266e-16	6.40027e-14	FALSE
Glu-DL	ENSG00000307260		4	rs11934095	11882638	A	G	0.279851	0.468595	0.0854989	4.16222e-07	0.000330933	0.005369	FALSE
Glu-DL	ENSG00000304274		4	rs4270584	15599176	A	G	0.358209	0.459077	0.0763903	4.35699e-08	6.06507e-05	0.00123249	FALSE
Glu-DL	ENSG00000288606		4	rs74867378	16093884	T	C	0.0559702	0.629218	0.119882	1.08982e-06	0.00100185	0.0136032	FALSE
Glu-DL	ENSG00000152990	ADGRA3	4	rs358258	22789722	T	C	0.675373	0.118575	0.0248587	7.45811e-06	0.0045542	0.0458072	FALSE
Glu-DL	ENSG00000038210	PI4K2B	4	rs62411565	25157768	A	T	0.123134	-0.389267	0.0525288	8.10543e-11	2.69283e-07	1.03149e-05	FALSE
Glu-DL	ENSG00000304023		4	rs1973603	25304041	T	A	0.287313	-0.439616	0.0787881	2.74542e-07	0.000302118	0.00497559	FALSE
Glu-DL	ENSG00000299908		4	rs12641528	38994764	A	G	0.134328	-0.342084	0.0642016	7.84932e-07	0.00112011	0.0148556	FALSE
Glu-DL	ENSG00000249685		4	rs3796509	39108566	G	T	0.548507	0.288473	0.0582217	3.58778e-06	0.00275083	0.0312024	FALSE
Glu-DL	ENSG00000163288	GABRB1	4	rs28438881	47027816	T	A	0.533582	-0.168036	0.0345975	5.29522e-06	0.00232558	0.0270966	FALSE
Glu-DL	ENSG00000072201	LNX1	4	rs11737139	53483170	G	C	0.746269	-0.19027	0.034231	3.00356e-07	0.000356121	0.00569291	FALSE
Glu-DL	ENSG00000138744	NAAA	4	rs6843072	75933375	C	T	0.58209	0.24442	0.0401535	3.10951e-08	0.000137925	0.00252464	FALSE
Glu-DL	ENSG00000163749	CCDC158	4	rs4447885	76501018	A	G	0.410448	-0.259512	0.0424433	2.76171e-08	6.64788e-05	0.00133062	FALSE
Glu-DL	ENSG00000138764	CCNG2	4	rs59757896	77182051	G	A	0.0820896	-0.373219	0.0581892	7.38322e-09	1.24384e-05	0.000317973	FALSE
Glu-DL	ENSG00000138759	FRAS1	4	rs72657073	78368056	A	T	0.279851	-0.282228	0.0608235	1.23681e-05	0.00494492	0.0487714	TRUE
Glu-DL	ENSG00000138640	FAM13A	4	rs1513819	89159786	T	G	0.615672	0.152201	0.0313486	5.33272e-06	0.00352336	0.0373929	FALSE
Glu-DL	ENSG00000109323	MANBA	4	rs9994654	102997908	A	C	0.16791	-0.194138	0.0320341	3.49441e-08	3.02361e-05	0.000680138	FALSE
Glu-DL	ENSG00000169836	TACR3	4	rs233981	103751190	C	G	0.279851	-0.413097	0.0721955	1.50232e-07	9.97536e-05	0.00190141	FALSE
Glu-DL	ENSG00000248242		4	rs10026964	105076033	T	A	0.619403	0.597862	0.0859556	6.48803e-10	1.15548e-06	3.73411e-05	TRUE
Glu-DL	ENSG00000287290		4	rs72914146	117300849	A	G	0.0485075	-0.637505	0.134409	8.28819e-06	0.00468897	0.0467406	FALSE
Glu-DL	ENSG00000291202		4	rs7696875	119401203	G	T	0.291045	0.540149	0.0591135	2.58277e-14	3.71384e-10	2.71505e-08	FALSE
Glu-DL	ENSG00000248863		4	rs1843943	139277955	C	T	0.272388	-0.326389	0.0398628	2.20464e-12	3.7468e-08	1.78972e-06	FALSE
Glu-DL	ENSG00000145391	SETD7	4	rs697579	139623229	C	A	0.578358	-0.171994	0.0259106	2.71741e-09	5.2483e-06	0.000145996	TRUE
Glu-DL	ENSG00000294159		4	rs7699206	146418755	A	G	0.548507	0.260422	0.0493171	9.55784e-07	0.00067263	0.00977509	TRUE
Glu-DL	ENSG00000137460	FHDC1	4	rs56738224	152891396	G	T	0.41791	0.246083	0.0477994	1.64335e-06	0.0012702	0.0165713	FALSE
Glu-DL	ENSG00000145428	RNF175	4	rs10010771	153896280	C	T	0.529851	-0.139293	0.0290065	6.57348e-06	0.00496664	0.048781	FALSE
Glu-DL	ENSG00000164114	MAP9	4	rs6851250	155373769	T	C	0.294776	-0.145024	0.0290355	3.05701e-06	0.00247429	0.0285793	FALSE
Glu-DL	ENSG00000109756	RAPGEF2	4	rs78311165	159102892	C	G	0.298507	-0.103487	0.0168344	2.39027e-08	2.46236e-05	0.000568144	TRUE
Glu-DL	ENSG00000198948	MFAP3L	4	rs11726547	169949686	C	G	0.518657	-0.251333	0.0534729	9.7966e-06	0.00489364	0.0484092	FALSE
Glu-DL	ENSG00000198948	MFAP3L	4	rs11726547	169949686	C	G	0.518657	-0.251333	0.0534729	9.7966e-06	0.00489364	0.0484092	FALSE
Glu-DL	ENSG00000248174	LINC02268	4	rs75315518	174106759	C	T	0.134328	1.08443	0.101235	1.66236e-17	3.05569e-13	3.98217e-11	FALSE
Glu-DL	ENSG00000109771	LRP2BP	4	rs112017996	185389059	T	C	0.115672	-0.459618	0.0674533	1.23163e-09	5.63665e-06	0.000155715	FALSE
Glu-DL	ENSG00000145476	CYP4V2	4	rs7663027	186191475	G	C	0.354478	-0.468483	0.06576	3.01158e-10	3.42193e-06	0.000100512	TRUE
Glu-DL	ENSG00000290316		4	rs62350518	186197204	C	T	0.197761	0.360727	0.0691449	1.24111e-06	0.00289314	0.0323876	FALSE
Glu-DL	ENSG00000301147		4	rs56372422	189343665	T	A	0.94403	-3.35355	0.243451	1.79285e-23	1.82569e-15	3.31651e-13	FALSE
Glu-DL	ENSG00000286753		5	rs4478286	5300161	G	A	0.630597	0.143068	0.0287104	3.20222e-06	0.00362747	0.0382846	FALSE
Glu-DL	ENSG00000294384		5	rs4701724	6365576	T	C	0.526119	-0.354514	0.057737	2.46688e-08	6.08343e-05	0.00123413	FALSE
Glu-DL	ENSG00000250490	LINC02145	5	rs271399	6368408	G	A	0.447761	0.327176	0.0649097	2.54292e-06	0.00323948	0.0350221	FALSE
Glu-DL	ENSG00000248131	LINC01194	5	rs6887002	12662780	A	G	0.171642	1.46605	0.114708	1.39177e-21	4.53422e-16	9.37289e-14	FALSE
Glu-DL	ENSG00000309532		5	rs2270915	32786283	A	G	0.238806	-0.651518	0.0765502	4.86739e-13	2.7548e-09	1.62702e-07	TRUE
Glu-DL	ENSG00000152582	SPEF2	5	rs284770	35425080	C	T	0.865672	-0.31798	0.0648838	4.44937e-06	0.00352236	0.0373929	FALSE
Glu-DL	ENSG00000112964	GHR	5	rs116642278	42264417	T	C	0.0671642	0.493666	0.107699	1.53695e-05	0.00374774	0.0391405	FALSE
Glu-DL	ENSG00000164181	ELOVL7	5	rs377321	60555913	G	C	0.514925	0.26563	0.0538395	3.90175e-06	0.00204394	0.0246041	FALSE
Glu-DL	ENSG00000086189	DIMT1	5	rs247262	62406901	T	C	0.578358	-0.260223	0.0424868	2.63811e-08	3.97471e-05	0.000864873	FALSE
Glu-DL	ENSG00000123219	CENPK	5	rs33394	65483117	G	A	0.597015	0.225979	0.0481682	1.01349e-05	0.00466835	0.0467203	TRUE
Glu-DL	ENSG00000183323	CCDC125	5	rs68083627	69301072	C	T	0.473881	0.191656	0.0273738	5.26573e-10	5.88014e-07	2.05538e-05	FALSE
Glu-DL	ENSG00000296380		5	rs7710143	71379903	A	G	0.686567	0.501481	0.0846589	6.32479e-08	5.47077e-06	0.000151481	FALSE
Glu-DL	ENSG00000214944	ARHGEF28	5	rs952995	73745959	A	G	0.708955	0.691191	0.0694391	5.64753e-16	8.15031e-12	8.80339e-10	TRUE
Glu-DL	ENSG00000152359	POC5	5	rs6893029	75671374	G	C	0.175373	-0.351875	0.0677479	1.36403e-06	0.00125579	0.0164012	FALSE
Glu-DL	ENSG00000113318	MSH3	5	rs1232027	80619201	G	A	0.30597	-0.142458	0.0221086	6.47243e-09	1.20536e-05	0.000309456	FALSE
Glu-DL	ENSG00000172497	ACOT12	5	rs35657180	81427874	T	A	0.220149	-0.337548	0.0628305	6.53901e-07	0.000819186	0.0115412	FALSE
Glu-DL	ENSG00000152348	ATG10	5	rs178957	82120486	A	G	0.190299	0.457227	0.0394963	3.13359e-19	1.08084e-14	1.75118e-12	FALSE
Glu-DL	ENSG00000293465		5	rs226203	82274575	G	A	0.720149	-0.349658	0.044022	6.90352e-12	4.32896e-08	2.02741e-06	FALSE
Glu-DL	ENSG00000248112		5	rs7722924	83060223	T	C	0.455224	1.18912	0.0770284	1.62356e-26	6.3038e-21	3.80897e-18	FALSE
Glu-DL	ENSG00000289462		5	rs10068637	88613076	T	A	0.276119	-0.311677	0.0629984	3.69476e-06	0.000893891	0.0124042	FALSE
Glu-DL	ENSG00000287862		5	rs6452769	88093210	G	A	0.264925	0.511889	0.0507808	3.13e-16	3.16467e-12	3.57949e-10	TRUE
Glu-DL	ENSG00000250049		5	rs77009124	91637775	A	G	0.0597015	-0.573504	0.110297	1.33234e-06	0.00140698	0.018061	FALSE
Glu-DL	ENSG00000185261	KIAA0825	5	rs13156960	94749983	T	G	0.141791	0.141559	0.0211667	2.17278e-09	5.21641e-06	0.000145446	FALSE
Glu-DL	ENSG00000173221	GLRX	5	rs6556883	95816381	A	G	0.761194	0.305232	0.053643	1.7205e-07	0.000130855	0.00240995	FALSE
Glu-DL	ENSG00000173930	SLCO4C1	5	rs4639187	102423715	G	A	0.656716	0.329602	0.0634359	1.3533e-06	0.000727274	0.0104301	FALSE
Glu-DL	ENSG00000297797		5	rs13157247	103553609	C	G	0.134328	0.594076	0.107286	3.28235e-07	0.000373012	0.0059313	FALSE
Glu-DL	ENSG00000286882		5	rs33730	109337054	T	A	0.399254	0.32336	0.0689912	1.03131e-05	0.00500478	0.0490039	FALSE
Glu-DL	ENSG00000249476		5	rs17161729	109324827	G	C	0.227612	0.50284	0.063222	6.56645e-12	6.20441e-08	2.80707e-06	FALSE
Glu-DL	ENSG00000186952	TMEM232	5	rs463718	110708137	G	A	0.731343	-0.167497	0.0280629	5.20453e-08	4.45884e-05	0.000956331	FALSE
Glu-DL	ENSG00000134986	NREP	5	rs495647	111748472	C	A	0.0970149	0.273342	0.0555223	4.07059e-06	0.00299151	0.0332147	TRUE
Glu-DL	ENSG00000251076		5	rs56927888	112580434	A	G	0.0932836	-0.494008	0.0999821	3.79078e-06	0.00313465	0.0342595	FALSE
Glu-DL	ENSG00000129595	EPB41L4A	5	rs7722291	112326159	A	T	0.182836	0.340421	0.054144	1.29246e-08	2.2891e-05	0.000536035	FALSE
Glu-DL	ENSG00000239642	MEIKIN	5	rs7724769	131619250	C	T	0.820895	-0.60446	0.065319	1.49578e-14	9.83756e-11	8.19075e-09	FALSE
Glu-DL	ENSG00000072682	P4HA2	5	rs157577	132227878	G	C	0.69403	-0.237741	0.050252	8.68868e-06	0.00303419	0.0334974	TRUE
Glu-DL	ENSG00000113621	TXNDC15	5	rs3733897	134887903	A	G	0.115672	0.906304	0.0468034	4.19521e-33	4.79513e-27	9.58181e-24	FALSE
Glu-DL	ENSG00000152377	SPOCK1	5	rs10072339	137307889	G	A	0.186567	0.123238	0.0265811	1.25525e-05	0.00494727	0.0487714	FALSE
Glu-DL	ENSG00000146005	PSD2	5	rs60870216	139803222	C	G	0.287313	0.112071	0.0221399	2.33178e-06	0.00100422	0.0136046	FALSE
Glu-DL	ENSG00000213523	SRA1	5	rs11749712	140373797	T	A	0.447761	0.225073	0.028481	8.32329e-12	2.43867e-08	1.21321e-06	FALSE
Glu-DL	ENSG00000283155		5	rs2878916	140591932	T	A	0.279851	0.597875	0.0872757	1.04423e-09	9.16498e-07	3.0608e-05	FALSE
Glu-DL	ENSG00000204961	PCDHA9	5	rs11749013	140859624	G	C	0.126866	-0.312964	0.060665	1.57352e-06	0.000756262	0.0107942	FALSE
Glu-DL	ENSG00000308869		5	rs351251	142007593	G	C	0.86194	-0.594368	0.0748232	6.877e-12	6.41974e-08	2.89357e-06	FALSE
Glu-DL	ENSG00000133706	LARS1	5	rs62371946	146125017	G	A	0.201493	0.122042	0.0238898	1.93106e-06	0.00161878	0.0203015	FALSE
Glu-DL	ENSG00000291115		5	rs12659118	150945060	T	C	0.0858209	0.951896	0.11787	3.71665e-12	2.51276e-08	1.23978e-06	FALSE
Glu-DL	ENSG00000288081		5	rs187180	151468434	G	A	0.369403	0.513809	0.0553577	1.31385e-14	1.36191e-10	1.10328e-08	FALSE
Glu-DL	ENSG00000310234		5	rs10041141	153718094	T	C	0.473881	0.615207	0.0735426	9.62179e-13	3.64096e-09	2.10884e-07	FALSE
Glu-DL	ENSG00000285868		5	rs138718099	157419219	A	G	0.473881	-0.264256	0.0416865	1.02818e-08	4.73887e-05	0.0010056	FALSE
Glu-DL	ENSG00000135074	ADAM19	5	rs72811372	157595467	G	A	0.0970149	-0.207534	0.039167	8.86973e-07	0.00104007	0.013964	TRUE
Glu-DL	ENSG00000204767	INSYN2B	5	rs10043693	170185864	A	G	0.291045	-0.398696	0.0792657	2.65401e-06	0.00299473	0.0332147	FALSE
Glu-DL	ENSG00000160867	FGFR4	5	rs353491	177005946	C	G	0.473881	0.308704	0.0584663	9.5787e-07	0.000790468	0.0111892	TRUE
Glu-DL	ENSG00000169223	LMAN2	5	rs4976688	177357438	T	C	0.309702	-0.150493	0.0303038	3.42767e-06	0.00438803	0.0445093	TRUE
Glu-DL	ENSG00000164385	LINC01600	6	rs9501863	2623189	C	T	0.208955	0.235969	0.0428611	3.75257e-07	0.00280318	0.0315573	FALSE
Glu-DL	ENSG00000180822	PSMG4	6	rs2808004	3233107	T	C	0.0895522	-0.223858	0.0350817	8.54108e-09	1.86725e-05	0.000451356	FALSE
Glu-DL	ENSG00000228793		6	rs4959863	3717537	C	A	0.574627	0.441046	0.0862684	1.90041e-06	0.00183379	0.0225037	FALSE
Glu-DL	ENSG00000285216		6	rs1832098	8446667	C	G	0.470149	-0.208992	0.0252811	1.52498e-12	3.72919e-08	1.78844e-06	FALSE
Glu-DL	ENSG00000285219	HULC	6	rs1832098	8446667	C	G	0.470149	-0.288697	0.0392845	1.07614e-10	1.99622e-06	6.15258e-05	FALSE
Glu-DL	ENSG00000285219	HULC	6	rs1832098	8446667	C	G	0.470149	-0.288697	0.0392845	1.07614e-10	1.99622e-06	6.15258e-05	FALSE
Glu-DL	ENSG00000137210	TMEM14B	6	rs1233845	10845843	A	T	0.589552	0.0972541	0.0131186	7.9974e-11	9.90781e-07	3.27512e-05	FALSE
Glu-DL	ENSG00000272162		6	rs518204	10829086	C	T	0.716418	0.159768	0.0266634	4.70272e-08	0.000211131	0.00364747	FALSE
Glu-DL	ENSG00000153157	SYCP2L	6	rs518204	10829086	C	T	0.716418	0.146308	0.0284826	1.72194e-06	0.00212898	0.0253599	FALSE
Glu-DL	ENSG00000247925		6	rs9468452	11121760	A	G	0.25	-0.304918	0.0336522	3.69907e-14	9.98073e-10	6.46829e-08	TRUE
Glu-DL	ENSG00000234427		6	rs6910363	11809134	G	A	0.421642	0.352075	0.0728861	5.87795e-06	0.00468675	0.0467406	FALSE
Glu-DL	ENSG00000303988		6	rs4602719	13295270	T	C	0.865672	-0.384905	0.0681804	2.07977e-07	0.00054198	0.00817363	FALSE
Glu-DL	ENSG00000145979	TBC1D7	6	rs538190	13327545	T	C	0.25	0.164495	0.0325463	2.40609e-06	0.00139138	0.0179182	FALSE
Glu-DL	ENSG00000145979	TBC1D7	6	rs538190	13327545	T	C	0.25	0.164495	0.0325463	2.40609e-06	0.00139138	0.0179182	FALSE
Glu-DL	ENSG00000112293	GPLD1	6	rs2322458	24521676	T	C	0.294776	0.149726	0.0300859	3.28705e-06	0.00475095	0.0472315	FALSE
Glu-DL	ENSG00000112308	C6orf62	6	rs56056726	24678219	G	C	0.208955	0.265386	0.035718	7.40973e-11	2.70654e-07	1.03343e-05	FALSE
Glu-DL	ENSG00000026950	BTN3A1	6	rs12214031	26376400	T	C	0.432836	0.252043	0.052299	6.14366e-06	0.00290259	0.0324328	TRUE
Glu-DL	ENSG00000290474		6	rs9348736	26951100	A	C	0.108209	-0.668625	0.0623057	1.52012e-17	1.41335e-12	1.69452e-10	FALSE
Glu-DL	ENSG00000124613	ZNF391	6	rs13217798	27414801	A	T	0.723881	0.30759	0.0549547	2.55066e-07	0.000329794	0.00536504	FALSE
Glu-DL	ENSG00000198315	ZKSCAN8	6	rs17336532	28575487	C	T	0.235075	0.181823	0.0297317	2.74787e-08	1.8762e-05	0.000452607	FALSE
Glu-DL	ENSG00000197062	ZSCAN26	6	rs13408	28244970	G	A	0.447761	-0.155974	0.0220209	3.63256e-10	1.10416e-06	3.5779e-05	FALSE
Glu-DL	ENSG00000187987	ZSCAN23	6	rs2531806	28449375	C	A	0.496269	0.222424	0.0281794	8.69617e-12	9.98329e-07	3.27929e-05	FALSE
Glu-DL	ENSG00000290870		6	rs72492279	29817045	C	A	0.130597	0.742889	0.124676	5.43684e-08	9.61253e-05	0.00184398	FALSE
Glu-DL	ENSG00000280128		6	rs2023476	30261806	G	C	0.242537	-0.238358	0.0394986	3.90897e-08	0.00039996	0.00627656	FALSE
Glu-DL	ENSG00000231074	HCG18	6	rs2023476	30261806	G	C	0.242537	-0.133284	0.021433	1.74862e-08	7.20174e-05	0.00142955	FALSE
Glu-DL	ENSG00000231074	HCG18	6	rs2023476	30261806	G	C	0.242537	-0.133284	0.021433	1.74862e-08	7.20174e-05	0.00142955	FALSE
Glu-DL	ENSG00000204536	CCHCR1	6	rs2894186	31239091	G	C	0.391791	0.265863	0.0426949	1.68511e-08	8.21843e-05	0.00160741	FALSE
Glu-DL	ENSG00000204531	POU5F1	6	rs3130533	31241011	A	T	0.399254	0.316005	0.0561974	2.28544e-07	0.0007124	0.0102536	FALSE
Glu-DL	ENSG00000204428	LY6G5C	6	rs707920	31661319	T	C	0.272388	-0.636019	0.0648881	1.14972e-15	4.5905e-10	3.29566e-08	FALSE
Glu-DL	ENSG00000204396	VWA7	6	rs2736426	31777507	C	T	0.529851	0.291414	0.0574651	2.24685e-06	0.0029881	0.0332147	FALSE
Glu-DL	ENSG00000299747		6	rs13218331	32443585	A	C	0.175373	0.837229	0.133013	1.25315e-08	4.52971e-05	0.000968069	FALSE
Glu-DL	ENSG00000291111		6	rs3116984	33133302	T	G	0.242537	1.11108	0.0961631	3.46878e-19	1.33777e-13	1.84358e-11	FALSE
Glu-DL	ENSG00000156711	MAPK13	6	rs851005	36101712	A	G	0.5	-0.374083	0.0540948	7.78431e-10	3.72271e-06	0.000107447	FALSE
Glu-DL	ENSG00000112130	RNF8	6	rs2284923	37381144	C	T	0.477612	-0.164308	0.0300767	4.4835e-07	0.00293542	0.0327386	FALSE
Glu-DL	ENSG00000164627	KIF6	6	rs307479	39737435	A	G	0.929105	-0.692146	0.108082	7.71915e-09	1.9425e-05	0.00046579	FALSE
Glu-DL	ENSG00000290034		6	rs7748777	41166068	G	A	0.5	-0.436104	0.0638479	1.14329e-09	2.0257e-06	6.21152e-05	FALSE
Glu-DL	ENSG00000112576	CCND3	6	rs60905160	42046259	C	T	0.152985	0.327777	0.0585655	2.55501e-07	0.000270059	0.00452847	FALSE
Glu-DL	ENSG00000112599	GUCA1B	6	rs2395803	42190858	A	C	0.589552	0.376266	0.0559718	1.85987e-09	4.94853e-06	0.000138622	FALSE
Glu-DL	ENSG00000178233	TMEM151B	6	rs79067180	44292000	G	C	0.0559702	-0.285978	0.0527607	5.35761e-07	0.000841043	0.0118214	FALSE
Glu-DL	ENSG00000286417		6	rs111810959	44741723	C	A	0.313433	0.403864	0.0685637	7.29876e-08	9.47672e-05	0.00182376	FALSE
Glu-DL	ENSG00000196284	SUPT3H	6	rs9395084	45252438	T	C	0.309702	-0.122822	0.0236813	1.40619e-06	0.000709643	0.0102262	FALSE
Glu-DL	ENSG00000180113	TDRD6	6	rs953062	46658616	A	G	0.347015	-0.362582	0.0768969	9.24139e-06	0.0046791	0.0467406	FALSE
Glu-DL	ENSG00000137269	LRRC1	6	rs4518484	53741314	G	T	0.320896	0.221838	0.0342872	5.75422e-09	1.21358e-05	0.000310901	FALSE
Glu-DL	ENSG00000082293	COL19A1	6	rs2487426	69858208	T	A	0.462687	-0.25013	0.045439	3.7636e-07	0.000330567	0.005369	FALSE
Glu-DL	ENSG00000112305	SMAP1	6	rs75138122	71090280	T	C	0.0559702	-0.226113	0.0464675	5.10662e-06	0.0033178	0.0358043	FALSE
Glu-DL	ENSG00000298699		6	rs9343820	78770741	T	A	0.458955	-0.188942	0.0376396	2.76417e-06	0.00197426	0.0238853	FALSE
Glu-DL	ENSG00000298976		6	rs7744090	82903540	G	T	0.179104	0.587393	0.0918492	8.02196e-09	9.13337e-06	0.000240668	FALSE
Glu-DL	ENSG00000135315	CEP162	6	rs62418662	84104785	A	G	0.149254	0.14061	0.0280371	2.81596e-06	0.00140261	0.018032	FALSE
Glu-DL	ENSG00000111886	GABRR2	6	rs9294432	89310248	C	T	0.492537	0.427154	0.0657787	5.17569e-09	1.14405e-05	0.000295614	FALSE
Glu-DL	ENSG00000287578		6	rs12209764	95937174	C	G	0.324627	0.286198	0.0491395	9.70108e-08	0.000111078	0.00209397	FALSE
Glu-DL	ENSG00000286084		6	rs9486079	105404103	T	G	0.320896	0.315487	0.0440729	2.57648e-10	4.82235e-07	1.72075e-05	FALSE
Glu-DL	ENSG00000178409	BEND3	6	rs4946810	107099066	A	C	0.324627	0.207989	0.0379756	4.22894e-07	0.000620158	0.00915683	FALSE
Glu-DL	ENSG00000185250	PPIL6	6	rs3799842	109471826	T	C	0.496269	0.154402	0.027693	2.7946e-07	0.000494561	0.00755351	FALSE
Glu-DL	ENSG00000253194		6	rs9387621	118973412	C	T	0.429104	0.349546	0.0473754	9.40454e-11	3.73172e-07	1.3809e-05	FALSE
Glu-DL	ENSG00000111879	FAM184A	6	rs113320639	118977986	A	G	0.141791	-0.212942	0.0388841	4.23949e-07	0.000357823	0.0057125	FALSE
Glu-DL	ENSG00000111906	HDDC2	6	rs9482622	125268655	G	A	0.0783582	-0.564954	0.0940518	4.40995e-08	0.000133396	0.00244921	FALSE
Glu-DL	ENSG00000299250		6	rs12203812	127296671	A	T	0.563433	0.0850022	0.018135	1.03053e-05	0.0036622	0.0384484	FALSE
Glu-DL	ENSG00000198945	L3MBTL3	6	rs6569648	130027974	C	T	0.794776	-0.22217	0.0413129	6.3947e-07	0.0005842	0.0087009	FALSE
Glu-DL	ENSG00000118514	ALDH8A1	6	rs4896120	134972374	C	G	0.496269	-0.418193	0.0533866	1.14826e-11	2.16871e-07	8.60979e-06	FALSE
Glu-DL	ENSG00000135541	AHI1	6	rs7759971	135425746	C	T	0.384328	-0.435301	0.0294698	2.5833e-25	5.51166e-20	2.87311e-17	FALSE
Glu-DL	ENSG00000270638		6	rs62437862	145301986	C	T	0.0858209	-0.518079	0.116087	2.43775e-05	0.0046799	0.0467406	FALSE
Glu-DL	ENSG00000112425	EPM2A	6	rs6570699	145599596	G	A	0.552239	-0.223017	0.0272568	2.26441e-12	9.44754e-09	5.17217e-07	FALSE
Glu-DL	ENSG00000152822	GRM1	6	rs10457055	145537321	C	T	0.0932836	0.282179	0.0622601	1.87208e-05	0.00323724	0.0350221	FALSE
Glu-DL	ENSG00000164506	STXBP5	6	rs6920901	147108162	C	T	0.608209	-0.0970516	0.0187428	1.45515e-06	0.000948431	0.0130105	FALSE
Glu-DL	ENSG00000286533		6	rs2758316	159644342	A	G	0.626866	-0.333083	0.0501702	2.70431e-09	1.39508e-05	0.00035139	FALSE
Glu-DL	ENSG00000276960		6	rs783178	160748707	C	T	0.511194	0.316794	0.0629664	2.64027e-06	0.001848	0.022632	FALSE
Glu-DL	ENSG00000287558		6	rs59754710	160766818	C	A	0.511194	0.578001	0.0422725	2.78482e-23	9.50859e-18	3.00007e-15	TRUE
Glu-DL	ENSG00000231863		6	rs598306	160936724	A	G	0.735075	-0.30777	0.0569467	5.72054e-07	0.00062457	0.00921062	FALSE
Glu-DL	ENSG00000026297	RNASET2	6	rs3823208	166934358	T	C	0.328358	-0.17267	0.0318626	5.38192e-07	0.000709389	0.0102262	FALSE
Glu-DL	ENSG00000298421		6	rs3934912	167443249	G	C	0.466418	-0.514697	0.0704128	1.2881e-10	6.08505e-07	2.10856e-05	TRUE
Glu-DL	ENSG00000125337	KIF25	6	rs10945460	168015592	C	T	0.100746	0.806723	0.130418	2.0209e-08	8.70826e-05	0.00168943	FALSE
Glu-DL	ENSG00000226194	LINC02519	6	rs80267898	169640210	G	A	0.0671642	0.602216	0.111659	5.99324e-07	0.00109809	0.0145797	TRUE
Glu-DL	ENSG00000112584	FAM120B	6	rs6934743	170387297	A	G	0.69403	0.094076	0.0160571	8.3592e-08	0.000140839	0.00256234	FALSE
Glu-DL	ENSG00000146540	C7orf50	7	rs74652290	1050473	G	A	0.160448	-0.133243	0.0230223	1.13494e-07	0.000192054	0.00334197	TRUE
Glu-DL	ENSG00000106266	SNX8	7	rs2398661	2353997	C	A	0.488806	0.432436	0.0293904	3.28934e-25	1.08783e-19	5.21696e-17	TRUE
Glu-DL	ENSG00000291037		7	rs57342527	5146856	C	T	0.242537	0.432327	0.0751867	1.33244e-07	0.000269848	0.00452847	FALSE
Glu-DL	ENSG00000164638	SLC29A4	7	rs4720572	5301709	T	C	0.324627	0.200154	0.0306921	4.57762e-09	1.71736e-05	0.000419352	FALSE
Glu-DL	ENSG00000290835		7	rs6967414	6710127	G	A	0.182836	-0.242002	0.0399388	3.51021e-08	9.1834e-05	0.00177301	FALSE
Glu-DL	ENSG00000146574	CCZ1B	7	rs113745104	6827625	G	A	0.0634328	-0.46088	0.0850041	5.32225e-07	0.0035688	0.0378319	FALSE
Glu-DL	ENSG00000106392	C1GALT1	7	rs6463656	7204550	C	T	0.432836	0.223976	0.0330623	1.47209e-09	1.56138e-05	0.000387579	FALSE
Glu-DL	ENSG00000230825	LINC03016	7	rs4724965	7267401	A	G	0.220149	0.848623	0.08461	3.96263e-16	1.02313e-11	1.05747e-09	FALSE
Glu-DL	ENSG00000300984		7	rs13235527	12099294	G	T	0.160448	0.366052	0.0725205	2.4713e-06	0.00385727	0.0400056	FALSE
Glu-DL	ENSG00000105849	POLR1F	7	rs67156140	19463206	T	C	0.0597015	-0.510065	0.102585	3.34646e-06	0.00363105	0.0382887	FALSE
Glu-DL	ENSG00000136243	NUP42	7	rs1881201	23154394	C	T	0.585821	0.205477	0.0339608	3.649e-08	9.03585e-05	0.00174733	FALSE
Glu-DL	ENSG00000105926	PALS2	7	rs28681433	24431930	A	G	0.705224	0.118093	0.0226449	1.25119e-06	0.00169768	0.0210925	FALSE
Glu-DL	ENSG00000301643		7	rs1229659	26397154	G	A	0.384328	-0.388177	0.0636289	2.93162e-08	4.07776e-05	0.000884087	FALSE
Glu-DL	ENSG00000281039		7	rs111415208	30655772	A	G	0.0708955	-0.223806	0.0445859	2.76546e-06	0.00468988	0.0467406	FALSE
Glu-DL	ENSG00000305335		7	rs10237725	30519000	C	T	0.589552	-0.370496	0.0728776	2.1346e-06	0.002037	0.0245573	FALSE
Glu-DL	ENSG00000122507	BBS9	7	rs1050719	33605329	T	C	0.317164	0.15198	0.0163435	1.21045e-14	2.26811e-10	1.71027e-08	FALSE
Glu-DL	ENSG00000164619	BMPER	7	rs315864	33887546	A	G	0.533582	0.317026	0.0441173	2.27024e-10	4.65878e-07	1.67234e-05	TRUE
Glu-DL	ENSG00000291133		7	rs35860852	35083943	C	T	0.0783582	-0.401813	0.066906	4.43288e-08	8.3699e-05	0.00163171	FALSE
Glu-DL	ENSG00000287032		7	rs12113848	35619684	A	G	0.25	0.201833	0.0405307	3.24573e-06	0.00302254	0.0333995	FALSE
Glu-DL	ENSG00000006715	VPS41	7	rs2286104	38739697	G	A	0.201493	-0.150589	0.0248826	3.62398e-08	0.000107812	0.00203881	FALSE
Glu-DL	ENSG00000158683	PKD1L1	7	rs9648569	47910268	C	T	0.514925	-0.429261	0.0594157	1.90163e-10	1.64067e-06	5.19016e-05	FALSE
Glu-DL	ENSG00000132436	FIGNL1	7	rs12719030	50417375	T	C	0.485075	0.395839	0.0529437	5.97975e-11	4.30961e-07	1.56865e-05	FALSE
Glu-DL	ENSG00000154978	VOPP1	7	rs815966	55488935	T	C	0.350746	0.0967469	0.0201707	6.72273e-06	0.00439682	0.0445607	FALSE
Glu-DL	ENSG00000249773		7	rs6972799	55863620	A	G	0.511194	0.179403	0.0343001	1.17473e-06	0.000885828	0.0123352	FALSE
Glu-DL	ENSG00000178665	ZNF713	7	rs57153841	55927400	G	A	0.279851	0.281917	0.0363253	1.6065e-11	6.58893e-08	2.95871e-06	FALSE
Glu-DL	ENSG00000146731	CCT6A	7	rs4927	56061818	A	G	0.0485075	-0.499282	0.0822139	3.30776e-08	5.72253e-05	0.00117886	FALSE
Glu-DL	ENSG00000214652	ZNF727	7	rs10280161	64357393	A	G	0.626866	0.611893	0.115036	8.15192e-07	0.000529845	0.00800814	FALSE
Glu-DL	ENSG00000287985		7	rs10949890	64310738	G	C	0.246269	0.37539	0.0752286	3.11542e-06	0.0017407	0.0215377	FALSE
Glu-DL	ENSG00000197008	ZNF138	7	rs78251807	64833331	A	G	0.0858209	-0.216893	0.0451462	6.51865e-06	0.00470607	0.0468631	FALSE
Glu-DL	ENSG00000306252		7	rs6942993	64850974	C	T	0.514925	-0.512485	0.0715729	2.55282e-10	5.24503e-07	1.84956e-05	FALSE
Glu-DL	ENSG00000198039	ZNF273	7	rs13236784	64878489	G	A	0.38806	0.465819	0.0386377	3.56001e-20	4.20585e-14	6.38301e-12	FALSE
Glu-DL	ENSG00000152926	ZNF117	7	rs55887902	64947347	G	C	0.100746	0.226813	0.0481568	9.43401e-06	0.00290771	0.0324598	TRUE
Glu-DL	ENSG00000152926	ZNF117	7	rs55887902	64947347	G	C	0.100746	0.226813	0.0481568	9.43401e-06	0.00290771	0.0324598	TRUE
Glu-DL	ENSG00000227113		7	rs34346758	65047766	G	A	0.391791	0.44811	0.0810145	3.36734e-07	0.00013062	0.00240933	FALSE
Glu-DL	ENSG00000296823		7	rs34346758	65047766	G	A	0.391791	1.18375	0.0768236	1.82772e-26	6.28176e-21	3.80897e-18	FALSE
Glu-DL	ENSG00000295782		7	rs7781762	65484964	C	A	0.429104	-0.879425	0.091629	2.98814e-15	9.66701e-12	1.01668e-09	FALSE
Glu-DL	ENSG00000235421		7	rs4386866	65488764	C	T	0.604478	-1.31832	0.10106	4.33038e-22	2.37933e-17	7.13169e-15	FALSE
Glu-DL	ENSG00000284461		7	rs12672638	66738014	G	T	0.376866	-0.12149	0.0170195	2.82286e-10	5.14915e-07	1.82649e-05	FALSE
Glu-DL	ENSG00000154710	RABGEF1	7	rs73139978	66824601	G	A	0.11194	0.11324	0.0227886	3.38698e-06	0.000991755	0.0134967	FALSE
Glu-DL	ENSG00000291154		7	rs11769278	67267995	G	A	0.156716	-0.134019	0.0198231	1.56501e-09	5.67133e-06	0.000156313	TRUE
Glu-DL	ENSG00000009950	MLXIPL	7	rs2178026	73647689	C	G	0.0858209	1.23958	0.121645	1.876e-16	1.66068e-12	1.97134e-10	TRUE
Glu-DL	ENSG00000165171	METTL27	7	rs35558014	73808747	C	T	0.731343	-0.590512	0.0795149	7.53372e-11	6.97065e-07	2.36754e-05	FALSE
Glu-DL	ENSG00000290951		7	rs236650	75415153	T	C	0.742537	-0.362359	0.0485901	6.53026e-11	7.33441e-07	2.48405e-05	TRUE
Glu-DL	ENSG00000223705	NSUN5P1	7	rs236671	75432140	G	A	0.354478	-0.429671	0.0649211	2.96729e-09	4.29879e-06	0.000122133	FALSE
Glu-DL	ENSG00000272391	POM121C	7	rs236667	75425615	C	A	0.365672	-0.119378	0.0197466	3.72859e-08	0.00278851	0.0314513	FALSE
Glu-DL	ENSG00000188372	ZP3	7	rs6963784	76502495	C	G	0.369403	-0.295432	0.0578151	1.92001e-06	0.00116628	0.0153999	TRUE
Glu-DL	ENSG00000290873	LINC03009	7	rs1064143	76626135	G	A	0.604478	-0.30976	0.0232766	1.36595e-22	4.04987e-17	1.10859e-14	FALSE
Glu-DL	ENSG00000146707	POMZP3	7	rs1636645	76602279	T	C	0.593284	-0.319923	0.0472634	1.50849e-09	6.20233e-06	0.000169006	FALSE
Glu-DL	ENSG00000135205	CCDC146	7	rs1799122	76646342	A	G	0.208955	-0.151878	0.0306988	3.69513e-06	0.00239904	0.0278443	FALSE
Glu-DL	ENSG00000186088	GSAP	7	rs7808180	77418465	C	A	0.634328	0.280683	0.0487899	1.3163e-07	0.000132807	0.00244214	FALSE
Glu-DL	ENSG00000127947	PTPN12	7	rs12531933	77671171	G	A	0.339552	-0.102512	0.0166787	2.40125e-08	5.33103e-05	0.00110965	FALSE
Glu-DL	ENSG00000135218	CD36	7	rs37934	80335358	A	G	0.235075	-0.300937	0.0612677	4.25745e-06	0.00348368	0.0370935	TRUE
Glu-DL	ENSG00000198822	GRM3	7	rs701332	86648318	T	C	0.164179	0.149917	0.0244547	2.57403e-08	2.37808e-05	0.000553629	FALSE
Glu-DL	ENSG00000223665		7	rs4729011	91886105	G	A	0.507463	0.194919	0.0289434	1.76173e-09	2.34789e-06	7.09001e-05	FALSE
Glu-DL	ENSG00000244055		7	rs10953071	92500083	T	A	0.880597	-0.243723	0.0509178	6.98712e-06	0.00217785	0.0257577	FALSE
Glu-DL	ENSG00000004766	VPS50	7	rs9886010	93330222	C	A	0.376866	0.0970395	0.0176995	4.12931e-07	0.000339431	0.00546987	FALSE
Glu-DL	ENSG00000158560	DYNC1I1	7	rs41278815	95827886	C	T	0.164179	-0.148759	0.0267716	3.02639e-07	0.000400724	0.00628033	FALSE
Glu-DL	ENSG00000279067		7	rs6950250	96224525	G	A	0.182836	-0.342046	0.0701025	4.8465e-06	0.00276798	0.0313153	FALSE
Glu-DL	ENSG00000070669	ASNS	7	rs187338551	97815645	C	T	0.152985	-0.252691	0.0407475	1.88636e-08	7.15952e-05	0.00142353	FALSE
Glu-DL	ENSG00000166529	ZSCAN21	7	rs7778571	100067194	A	G	0.223881	0.207374	0.0383777	5.74522e-07	0.000268611	0.00452316	FALSE
Glu-DL	ENSG00000221838	AP4M1	7	rs7809835	99989892	T	C	0.91791	0.289777	0.0602421	6.36717e-06	0.0021356	0.0253762	FALSE
Glu-DL	ENSG00000121716	PILRB	7	rs113387325	100315523	G	T	0.152985	0.409498	0.0330228	7.57432e-21	1.66519e-15	3.0715e-13	FALSE
Glu-DL	ENSG00000085514	PILRA	7	rs6962151	100430861	T	C	0.190299	0.25296	0.0350495	1.96799e-10	8.21859e-07	2.76012e-05	FALSE
Glu-DL	ENSG00000205307	SAP25	7	rs56307653	100521692	T	C	0.0708955	0.606955	0.109346	3.10131e-07	0.000272221	0.00454467	FALSE
Glu-DL	ENSG00000267368	UPK3BL1	7	rs10254446	102737562	G	A	0.738806	-0.435892	0.0822461	8.82736e-07	0.000394588	0.00621666	FALSE
Glu-DL	ENSG00000228049	POLR2J2	7	rs10253734	102744147	T	C	0.869403	-1.09778	0.0836293	3.02114e-22	8.94405e-17	2.18845e-14	FALSE
Glu-DL	ENSG00000289956		7	rs6975450	103371062	G	A	0.0597015	-0.555411	0.0630102	1.17371e-13	1.32504e-09	8.36132e-08	FALSE
Glu-DL	ENSG00000128536	CDHR3	7	rs193795	105981066	G	T	0.425373	-0.149332	0.0247556	3.94884e-08	5.95202e-05	0.0012157	FALSE
Glu-DL	ENSG00000135269	TES	7	rs1319886	116210408	T	C	0.533582	0.5908	0.0661821	6.93368e-14	5.56328e-10	3.83134e-08	TRUE
Glu-DL	ENSG00000077063	CTTNBP2	7	rs757038	118025882	A	G	0.514925	-0.114698	0.0203676	2.20683e-07	8.93163e-05	0.00172997	FALSE
Glu-DL	ENSG00000304750		7	rs6466648	118185243	C	G	0.641791	-0.473022	0.0696185	1.34421e-09	1.18635e-06	3.81426e-05	FALSE
Glu-DL	ENSG00000233417		7	rs62470550	120371840	A	G	0.0932836	0.436385	0.0949767	1.47389e-05	0.00272063	0.0308891	FALSE
Glu-DL	ENSG00000292309		7	rs146048977	128327719	C	T	0.108209	-0.39884	0.0824155	5.67486e-06	0.002861	0.0320877	FALSE
Glu-DL	ENSG00000242588		7	rs117260885	128543232	A	G	0.104478	0.114007	0.0226147	2.53452e-06	0.00182118	0.0223718	FALSE
Glu-DL	ENSG00000280828		7	rs17537088	128387695	T	C	0.119403	-0.557133	0.105883	1.03252e-06	0.000977906	0.0133233	TRUE
Glu-DL	ENSG00000135253	KCP	7	rs56167726	128920848	C	T	0.208955	0.574649	0.0704774	2.58547e-12	1.14926e-08	6.15134e-07	FALSE
Glu-DL	ENSG00000306749		7	rs7780021	131556326	G	A	0.302239	-0.137005	0.0225901	3.42717e-08	4.80022e-05	0.00101682	TRUE
Glu-DL	ENSG00000146856	AGBL3	7	rs74990069	135010318	T	G	0.324627	-0.20124	0.0344541	9.03268e-08	0.000100332	0.00190809	FALSE
Glu-DL	ENSG00000286458		7	rs1962205	135091509	G	T	0.518657	-0.213772	0.0370327	1.21048e-07	0.000266908	0.00450081	FALSE
Glu-DL	ENSG00000243317	STMP1	7	rs4294134	135608380	A	G	0.847015	-0.233747	0.0463799	2.54954e-06	0.00223388	0.0261808	FALSE
Glu-DL	ENSG00000257335	MGAM	7	rs1285955	141891545	A	G	0.559702	0.440896	0.0608036	1.68477e-10	2.86297e-07	1.0894e-05	FALSE
Glu-DL	ENSG00000187260	WDR86	7	rs28665356	151423712	T	C	0.268657	0.213991	0.0308758	7.25952e-10	2.01158e-06	6.18403e-05	FALSE
Glu-DL	ENSG00000286565		7	rs1860711	152929047	T	G	0.436567	-0.406938	0.0497897	2.36093e-12	1.23807e-08	6.59722e-07	FALSE
Glu-DL	ENSG00000298006		7	rs10275341	158917951	A	G	0.156716	-0.489532	0.0921673	8.41857e-07	0.00101099	0.0136653	TRUE
Glu-DL	ENSG00000292979		8	rs7822515	206504	G	A	0.279851	-0.189727	0.0339534	2.65272e-07	0.00500689	0.0490039	FALSE
Glu-DL	ENSG00000180190	TDRP	8	rs1075035	508148	G	C	0.227612	-0.1736	0.0294889	7.40665e-08	0.000321829	0.00524972	FALSE
Glu-DL	ENSG00000104714	ERICH1	8	rs1669681	656117	G	A	0.391791	-0.235599	0.0203096	2.80952e-19	1.13863e-13	1.58738e-11	FALSE
Glu-DL	ENSG00000104728	ARHGEF10	8	rs17756505	1859098	C	T	0.354478	0.153521	0.0231098	2.65583e-09	8.91299e-06	0.000235898	TRUE
Glu-DL	ENSG00000290357		8	rs7820625	7028389	T	A	0.347015	0.351125	0.0687291	1.92883e-06	0.00349972	0.0372313	TRUE
Glu-DL	ENSG00000104626	ERI1	8	rs7387360	9064954	C	T	0.455224	0.186753	0.0311196	4.52023e-08	0.000130333	0.00240773	FALSE
Glu-DL	ENSG00000261451		8	rs56331218	10432180	T	G	0.869403	-0.331971	0.0613551	5.57655e-07	0.00123359	0.0161464	FALSE
Glu-DL	ENSG00000253641	LINC03022	8	rs4840487	10481744	T	C	0.567164	-0.216382	0.0315493	1.00657e-09	7.31837e-06	0.000196293	FALSE
Glu-DL	ENSG00000184647	PRSS55	8	rs56017720	10489752	G	A	0.0858209	2.69022	0.145893	1.25645e-31	1.62485e-23	1.62342e-20	TRUE
Glu-DL	ENSG00000290829		8	rs35401001	12007612	G	A	0.485075	0.290286	0.0604929	6.66276e-06	0.00503815	0.049212	FALSE
Glu-DL	ENSG00000078674	PCM1	8	rs478420	17935344	G	A	0.58209	-0.139533	0.0169392	1.75024e-12	4.07436e-08	1.93846e-06	TRUE
Glu-DL	ENSG00000104763	ASAH1	8	rs12155668	18067642	C	T	0.473881	-0.247888	0.0269312	1.88624e-14	5.45442e-10	3.78646e-08	FALSE
Glu-DL	ENSG00000104613	INTS10	8	rs60369789	19821406	C	T	0.141791	-0.122359	0.0241349	2.259e-06	0.00471346	0.0468977	FALSE
Glu-DL	ENSG00000253164		8	rs55638716	20350124	C	G	0.104478	2.37481	0.138243	1.535e-29	6.86074e-22	5.48376e-19	TRUE
Glu-DL	ENSG00000301347		8	rs55638716	20350124	C	G	0.104478	2.2555	0.168791	1.07473e-22	1.28052e-16	3.07055e-14	TRUE
Glu-DL	ENSG00000197181	PIWIL2	8	rs4871992	22288872	G	A	0.402985	-0.409186	0.0622234	3.58507e-09	1.14886e-05	0.000296218	FALSE
Glu-DL	ENSG00000120896	SORBS3	8	rs28479396	22419341	G	A	0.253731	0.375253	0.0659342	1.71128e-07	0.000228285	0.00389887	FALSE
Glu-DL	ENSG00000134013	LOXL2	8	rs17696480	23401864	G	A	0.208955	-0.178442	0.0347747	1.75995e-06	0.00220939	0.026021	FALSE
Glu-DL	ENSG00000253875		8	rs60510630	27481682	C	T	0.0559702	-0.541099	0.10746	2.5961e-06	0.00259899	0.0296875	FALSE
Glu-DL	ENSG00000172728	FUT10	8	rs2676415	33473094	T	C	0.813433	-0.284058	0.0594766	7.28487e-06	0.00266584	0.0303532	TRUE
Glu-DL	ENSG00000085788	DDHD2	8	rs59498392	38402915	C	G	0.231343	0.129812	0.0241853	6.67509e-07	0.000530339	0.00800814	TRUE
Glu-DL	ENSG00000168575	SLC20A2	8	rs62510967	42586231	C	G	0.41791	-0.0947421	0.0187165	2.33179e-06	0.0015971	0.0200716	FALSE
Glu-DL	ENSG00000034239	CLXN	8	rs6985412	48677496	A	G	0.761194	-0.383361	0.0760125	2.51326e-06	0.00117087	0.0154434	FALSE
Glu-DL	ENSG00000289095		8	rs17676077	49873924	C	A	0.529851	-0.662895	0.0744462	7.707e-14	2.12321e-10	1.62141e-08	FALSE
Glu-DL	ENSG00000253260		8	rs10110581	59778648	G	A	0.712687	-0.446624	0.0888564	2.69172e-06	0.000852368	0.0119386	FALSE
Glu-DL	ENSG00000285971		8	rs9298062	62246134	T	C	0.597015	-0.541911	0.0428862	2.647e-21	3.6233e-16	7.75737e-14	FALSE
Glu-DL	ENSG00000253734	LINC01289	8	rs790566	63708815	T	C	0.764925	0.620412	0.0807167	2.26994e-11	4.15596e-08	1.95906e-06	FALSE
Glu-DL	ENSG00000221947	XKR9	8	rs34042354	70818726	A	G	0.492537	0.764528	0.0488247	6.56082e-27	3.81178e-21	2.6883e-18	FALSE
Glu-DL	ENSG00000285579		8	rs13255886	70653719	G	T	0.496269	0.7655	0.0522796	4.43596e-25	7.83982e-19	2.84833e-16	FALSE
Glu-DL	ENSG00000040341	STAU2	8	rs6989868	73279116	T	C	0.0932836	-0.103443	0.0193746	7.50446e-07	0.00066598	0.00971377	FALSE
Glu-DL	ENSG00000254349	MIR2052HG	8	rs10097802	74447977	G	A	0.686567	-0.286295	0.0583886	4.40532e-06	0.00282048	0.0317223	FALSE
Glu-DL	ENSG00000296852		8	rs2919917	78745028	T	C	0.324627	-0.356288	0.0405078	1.28351e-13	8.2775e-10	5.48301e-08	FALSE
Glu-DL	ENSG00000253778		8	rs2304789	86554965	C	T	0.339552	0.628548	0.0774086	3.02668e-12	1.3471e-08	7.0528e-07	FALSE
Glu-DL	ENSG00000251136	PARAIL	8	rs218899	89717279	G	A	0.626866	-0.242051	0.0307456	9.5635e-12	2.3796e-08	1.18875e-06	FALSE
Glu-DL	ENSG00000302563		8	rs2514686	100129639	T	C	0.406716	0.485474	0.0774486	1.40522e-08	1.31899e-05	0.000335041	FALSE
Glu-DL	ENSG00000253796		8	rs2926250	109319217	C	T	0.33209	-0.498898	0.0587399	5.28648e-13	2.08403e-09	1.26242e-07	FALSE
Glu-DL	ENSG00000286937		8	rs2927873	113449229	A	G	0.197761	0.391491	0.0774613	2.40772e-06	0.000842439	0.0118271	FALSE
Glu-DL	ENSG00000286282		8	rs61100635	119407970	A	G	0.235075	-0.394018	0.0685708	1.35477e-07	0.000120075	0.00224591	TRUE
Glu-DL	ENSG00000136982	DSCC1	8	rs7815122	119856782	G	T	0.190299	-0.618371	0.0506972	1.88401e-20	4.01212e-15	6.87187e-13	TRUE
Glu-DL	ENSG00000305490		8	rs11780771	124725992	A	C	0.578358	-0.479031	0.0656433	1.36242e-10	4.33066e-07	1.56865e-05	FALSE
Glu-DL	ENSG00000167653	PSCA	8	rs4736369	142670280	T	C	0.473881	0.588445	0.086931	1.50729e-09	3.20343e-06	9.50675e-05	TRUE
Glu-DL	ENSG00000305126		8	rs13439114	143024892	G	A	0.58209	-0.277691	0.0536151	1.44766e-06	0.00121771	0.0159908	FALSE
Glu-DL	ENSG00000185730	ZNF696	8	rs2235115	143296014	C	G	0.414179	0.319344	0.0376412	5.52584e-13	2.17477e-08	1.10018e-06	FALSE
Glu-DL	ENSG00000204839	MROH6	8	rs2305496	143577779	C	A	0.145522	-0.748852	0.102494	1.30833e-10	3.09292e-07	1.16979e-05	TRUE
Glu-DL	ENSG00000147813	NAPRT	8	rs10112966	143601764	C	T	0.742537	0.726127	0.0719537	2.97043e-16	2.79659e-12	3.19329e-10	FALSE
Glu-DL	ENSG00000203499	IQANK1	8	rs62526404	143771614	A	G	0.33209	0.304176	0.0468214	5.11375e-09	9.28306e-06	0.000244076	TRUE
Glu-DL	ENSG00000180921	FAM83H	8	rs13252381	143740421	C	T	0.507463	-0.428999	0.0576393	6.98631e-11	2.87129e-07	1.0894e-05	TRUE
Glu-DL	ENSG00000305900		8	rs73375129	143876108	A	G	0.145522	-0.636541	0.128822	3.78671e-06	0.00261302	0.0297801	FALSE
Glu-DL	ENSG00000178209	PLEC	8	rs6558406	143917935	T	C	0.548507	-0.144352	0.0288529	2.95667e-06	0.00223181	0.0261808	FALSE
Glu-DL	ENSG00000179698	WDR97	8	rs13264654	144120626	T	C	0.134328	0.54496	0.0794204	9.92203e-10	1.47459e-06	4.68952e-05	FALSE
Glu-DL	ENSG00000235173	HGH1	8	rs111281369	144210989	C	T	0.0932836	-0.534172	0.104387	1.86422e-06	0.00107625	0.0143374	TRUE
Glu-DL	ENSG00000071894	CPSF1	8	rs2291135	144399893	C	T	0.488806	0.293045	0.0348458	7.81618e-13	2.60862e-09	1.54831e-07	FALSE
Glu-DL	ENSG00000310152		8	rs2954657	144791647	C	T	0.58209	0.563951	0.0581046	1.80136e-15	2.78368e-11	2.62794e-09	FALSE
Glu-DL	ENSG00000196378	ZNF34	8	rs2958514	144793212	T	A	0.578358	0.285762	0.0538625	8.62764e-07	0.000348576	0.00557974	FALSE
Glu-DL	ENSG00000306202		9	rs2376225	2244446	G	A	0.865672	-0.558197	0.0970593	1.32649e-07	0.000270681	0.00453256	FALSE
Glu-DL	ENSG00000106686	SPATA6L	9	rs7035489	4671443	C	T	0.376866	0.198267	0.0320467	2.01072e-08	4.60467e-05	0.000980592	FALSE
Glu-DL	ENSG00000107077	KDM4C	9	rs11795183	6785359	T	A	0.328358	-0.131445	0.0196402	2.12613e-09	7.03694e-06	0.000189593	FALSE
Glu-DL	ENSG00000286474		9	rs10756218	11274206	C	T	0.559702	-0.628902	0.10444	4.13468e-08	0.000142273	0.00258059	FALSE
Glu-DL	ENSG00000164946	FREM1	9	rs7042782	14952714	A	C	0.593284	-0.354775	0.0544925	4.80377e-09	1.99013e-05	0.000475309	FALSE
Glu-DL	ENSG00000291185		9	rs4553007	14992111	G	C	0.570895	-0.289156	0.0454972	9.56478e-09	2.80837e-05	0.000636497	FALSE
Glu-DL	ENSG00000164989	CCDC171	9	rs2382532	15687848	G	A	0.402985	0.137987	0.023416	7.22071e-08	8.61772e-05	0.00167458	FALSE
Glu-DL	ENSG00000044459	CNTLN	9	rs12003380	17135436	G	C	0.455224	0.131269	0.0212317	2.04755e-08	3.23703e-05	0.00072431	TRUE
Glu-DL	ENSG00000147894	C9orf72	9	rs10812605	27510362	C	T	0.58209	-0.212004	0.0372355	1.69475e-07	0.000423414	0.0065843	TRUE
Glu-DL	ENSG00000307594		9	rs72712252	27697531	C	T	0.141791	0.766441	0.106826	2.3907e-10	1.0672e-06	3.46751e-05	FALSE
Glu-DL	ENSG00000107201	RIGI	9	rs641741	32496627	C	T	0.630597	-0.208332	0.032737	9.21776e-09	4.48961e-05	0.000961212	FALSE
[truncated: 34 more rows]

## Sheet: GABA
cell_type	ensembl_id	symbol	CHROM	SNP	POS	REF	ALT	AF	slope	slope_se	pval_nominal	pval_beta	qval	In_Peak
[truncated: 1,128 more rows]

[truncated: 16 more sheets: NPC, MG, OPC, Endo-Peri, Glu-UL-0, Glu-UL-1, Glu-UL-2, Glu-DL-0, Glu-DL-1, Glu-DL-2, GABA-0, GABA-1, GABA-2, NPC-0, NPC-1, NPC-2]
